# Supplementary material for: A structure map for AB2 type 2D materials using high-throughput DFT calculations
Source: Royal Society of Chemistry journal article supplement (doi:10.1039/d0ma00999g), 2021-01-01
Supplement: d0ma00999g1.pdf [file d0ma00999g1.pdf]

## Supplemental information 1

The space-group, lattice parameters, relative energy and spin magnetic moment are shown in the following tables. These tables are classified by the space-groups:  $P\bar{3}m1(164)$ ,  $P2_1/m(11)$ ,  $P4mmm(123)$ ,  $C2/m(12)$ ,  $P\bar{6}m2(187)$ ,  $Amm2(38)$ ,  $Cmmm(65)$ , Memory structures, Planar structures, Distorted planar structures.

T, H, and P represent the types of initial structures. X means the structure is not in the group “three stable structures” mentioned in the paper. The order of THP represents their stability. For example, “PTX” means the planar type initial structure is the most stable, the 1T type one is the second stable, and the 1H type one is much more unstable than the others. In other words, X means a structure whose relative energy exceed 0.03 Hartree ( $\approx 0.82$  eV) per the unit cell including 12 atoms. The space-groups of the obtained final structures for each initial states are also shown. The definitions of relative energies  $\Delta E_1$  and  $\Delta E_2$  are as follows:  $\Delta E_1 = E_{\text{the second stable structure}} - E_{\text{the most stable structure}}$ , and  $\Delta E_2 = E_{\text{the third stable structure}} - E_{\text{the most stable structure}}$ .

Table 1: List of  $P\bar{3}m1(164)$ 

| species           | Initial structure indices |                   | space group       |       |       | lattice parameters |                |       |       |       |                |                   | relative energy   |      | spin moment |     |     |
|-------------------|---------------------------|-------------------|-------------------|-------|-------|--------------------|----------------|-------|-------|-------|----------------|-------------------|-------------------|------|-------------|-----|-----|
|                   | T                         | H                 | P                 | a [Å] | b [Å] | c [Å]              | $\gamma$ [deg] | a [Å] | b [Å] | c [Å] | $\gamma$ [deg] | $\Delta E_1$ [eV] | $\Delta E_2$ [eV] | T    | H           | P   |     |
| LiAl <sub>2</sub> | HTX                       | $P\bar{3}m1(164)$ | —                 | 5.46  | 5.45  | 59.9               | 60.0           | 5.45  | 5.45  | 60.0  | —              | 0.046             | 3.644             | 0.0  | 0.0         | —   | —   |
| BeCa <sub>2</sub> | PTH                       | $P\bar{3}m1(164)$ | $P\bar{3}m1(164)$ | 8.62  | 8.62  | 58.8               | 59.9           | 7.77  | 7.76  | 59.9  | 60.2           | 0.020             | 0.231             | 0.0  | 0.0         | 0.0 | 0.0 |
| BeGe <sub>2</sub> | HTX                       | $P\bar{3}m1(164)$ | —                 | 7.45  | 7.45  | 59.9               | 41.5           | 7.70  | 7.69  | 41.5  | —              | 0.675             | 1.290             | 0.0  | 0.0         | —   | —   |
| BeRb <sub>2</sub> | THX                       | $P\bar{3}m1(164)$ | —                 | 10.74 | 10.74 | 56.9               | 49.0           | 10.59 | 10.59 | 49.0  | —              | 0.542             | 2.225             | 0.0  | 0.0         | —   | —   |
| BeTe <sub>2</sub> | TPX                       | $P\bar{3}m1(164)$ | $P\bar{1}(2)$     | 7.05  | 7.05  | 56.5               | —              | —     | —     | —     | 67.0           | 0.282             | 1.756             | 0.0  | 0.0         | —   | —   |
| BeCs <sub>2</sub> | TPX                       | $P\bar{3}m1(164)$ | —                 | 10.99 | 10.99 | 59.2               | 50.2           | 11.24 | 11.25 | 50.2  | —              | 0.787             | 2.815             | 0.0  | 0.0         | —   | —   |
| BeBa <sub>2</sub> | PTH                       | $P\bar{3}m1(164)$ | $P\bar{3}m1(164)$ | 10.03 | 10.03 | 57.0               | 58.2           | 8.97  | 8.96  | 58.2  | 58.8           | 0.007             | 0.278             | 0.0  | 0.0         | 0.0 | 0.0 |
| BeAl <sub>2</sub> | HTX                       | $P\bar{3}m1(164)$ | —                 | 6.13  | 6.10  | 54.9               | 55.7           | 6.08  | 6.09  | 55.7  | —              | 0.104             | 0.949             | 0.0  | 0.0         | —   | —   |
| BePb <sub>2</sub> | PTH                       | $P\bar{3}m1(164)$ | $P\bar{3}m1(164)$ | 8.34  | 8.34  | 59.2               | —              | 7.87  | 7.87  | 52.1  | —              | 0.102             | 0.416             | 0.0  | 0.0         | —   | —   |
| BmG <sub>2</sub>  | TPX                       | $P\bar{3}m1(164)$ | $P\bar{3}m1(164)$ | 7.45  | 7.43  | 55.6               | —              | —     | —     | —     | 55.8           | 0.003             | 1.172             | 0.0  | 0.0         | —   | —   |
| BSi <sub>2</sub>  | TPX                       | $P\bar{3}m1(164)$ | $P2_1/m(11)$      | 6.43  | 6.42  | 60.0               | —              | —     | —     | —     | 89.9           | 0.443             | 1.111             | 0.0  | —           | —   | —   |
| BK <sub>2</sub>   | THX                       | $P\bar{3}m1(164)$ | —                 | 10.11 | 10.12 | 57.7               | 52.3           | 9.22  | 9.21  | 52.3  | —              | 0.565             | 2.933             | 11.1 | 3.4         | —   | —   |
| BTi <sub>2</sub>  | PTH                       | $P\bar{3}m1(164)$ | $P\bar{1}(1)$     | 6.16  | 6.17  | 60.1               | —              | 5.12  | 5.12  | 59.6  | 36.3           | 0.451             | 3.307             | 0.0  | 0.0         | —   | —   |
| BNi <sub>2</sub>  | THX                       | $P\bar{3}m1(164)$ | —                 | 5.27  | 5.27  | 59.6               | —              | —     | —     | —     | —              | 0.413             | 4.629             | 0.0  | 0.0         | —   | —   |
| BGe <sub>2</sub>  | TXX                       | $P\bar{3}m1(164)$ | —                 | 6.71  | 6.71  | 60.0               | —              | —     | —     | —     | —              | 0.916             | 1.964             | 0.0  | —           | —   | —   |
| BRb <sub>2</sub>  | TXX                       | $P\bar{3}m1(164)$ | —                 | 10.45 | 10.46 | 58.3               | —              | —     | —     | —     | —              | 2.549             | 3.286             | 11.0 | —           | —   | —   |
| BY <sub>2</sub>   | TXX                       | $P\bar{3}m1(164)$ | —                 | 7.71  | 7.70  | 59.8               | —              | —     | —     | —     | —              | 1.297             | 3.219             | 0.0  | —           | —   | —   |
| BNb <sub>2</sub>  | TXX                       | $P\bar{3}m1(164)$ | —                 | 6.32  | 6.31  | 59.9               | —              | —     | —     | —     | —              | 4.132             | 13.651            | 0.0  | —           | —   | —   |
| BPd <sub>2</sub>  | THX                       | $P\bar{3}m1(164)$ | —                 | 5.87  | 5.87  | 60.0               | 59.9           | 5.73  | 5.73  | 59.9  | —              | 0.724             | 3.647             | 0.0  | 0.0         | —   | —   |
| BSn <sub>2</sub>  | TXX                       | $P\bar{3}m1(164)$ | —                 | 7.36  | 7.36  | 60.0               | —              | —     | —     | —     | —              | 1.261             | 2.480             | 0.0  | —           | —   | —   |
| BBa <sub>2</sub>  | PTH                       | $P\bar{3}m1(164)$ | $P\bar{3}m1(164)$ | 9.32  | 9.29  | 58.0               | —              | 9.19  | 9.25  | 59.1  | —              | 0.012             | 1.120             | 4.2  | —           | —   | 4.2 |
| BHF <sub>2</sub>  | HTX                       | $P\bar{3}m1(164)$ | —                 | 6.59  | 6.59  | 60.0               | —              | 6.32  | 6.33  | 53.9  | —              | 0.060             | 2.799             | 0.0  | 0.0         | —   | —   |
| BTa <sub>2</sub>  | TXX                       | $P\bar{3}m1(164)$ | —                 | 6.25  | 6.25  | 60.0               | —              | —     | —     | —     | —              | 1.487             | 4.771             | 0.0  | —           | —   | —   |
| BW <sub>2</sub>   | THX                       | $P\bar{3}m1(164)$ | —                 | 6.16  | 6.16  | 60.0               | —              | 5.77  | 5.77  | 59.9  | —              | 0.647             | 4.847             | 0.0  | 0.0         | —   | —   |
| BIr <sub>2</sub>  | THX                       | $P\bar{3}m1(164)$ | —                 | 5.43  | 5.43  | 60.0               | —              | 5.46  | 5.46  | 60.0  | —              | 0.226             | 13.691            | 0.0  | 0.0         | —   | —   |
| BPt <sub>2</sub>  | THX                       | $P\bar{3}m1(164)$ | —                 | 5.71  | 5.72  | 60.0               | —              | 5.68  | 5.69  | 60.0  | —              | 0.524             | 2.810             | 0.0  | 0.0         | —   | —   |
| CBe <sub>2</sub>  | PTH                       | $P\bar{3}m1(164)$ | $Pmmn(59)$        | 5.95  | 5.95  | 60.0               | —              | —     | —     | —     | 58.4           | 2.292             | 3.812             | 0.0  | —           | —   | 0.0 |
| CMg <sub>2</sub>  | TXX                       | $P\bar{3}m1(164)$ | —                 | 7.16  | 7.16  | 59.6               | —              | —     | —     | —     | —              | 2.292             | 3.812             | 0.0  | —           | —   | —   |
| CK <sub>2</sub>   | TXX                       | $P\bar{3}m1(164)$ | —                 | 9.26  | 9.28  | 58.4               | —              | —     | —     | —     | —              | 1.062             | 2.497             | 8.0  | —           | —   | —   |
| CCa <sub>2</sub>  | TXX                       | $P\bar{3}m1(164)$ | —                 | 7.94  | 7.94  | 58.9               | —              | —     | —     | —     | —              | 1.278             | 3.176             | 0.0  | —           | —   | —   |
| CTi <sub>2</sub>  | TXX                       | $P\bar{3}m1(164)$ | —                 | 6.10  | 6.11  | 60.0               | —              | —     | —     | —     | —              | 4.952             | 12.161            | 7.7  | —           | —   | —   |
| CV <sub>2</sub>   | TXX                       | $P\bar{3}m1(164)$ | —                 | 5.76  | 5.77  | 60.0               | —              | —     | —     | —     | —              | 3.652             | 4.154             | 0.0  | —           | —   | —   |
| CCr <sub>2</sub>  | THX                       | $P\bar{3}m1(164)$ | —                 | 5.62  | 5.65  | 59.8               | —              | 5.27  | 5.26  | 59.8  | —              | 0.352             | 7.427             | 0.0  | 0.0         | —   | —   |
| CNi <sub>2</sub>  | TXX                       | $P\bar{3}m1(164)$ | —                 | 5.80  | 5.80  | 59.7               | —              | —     | —     | —     | —              | 2.230             | 2.701             | 0.0  | —           | —   | —   |
| CGe <sub>2</sub>  | THX                       | $P\bar{3}m1(164)$ | —                 | 6.25  | 6.26  | 60.0               | —              | 6.19  | 6.19  | 60.0  | —              | 0.382             | 1.232             | 0.0  | 0.0         | —   | —   |
| CPd <sub>2</sub>  | TXX                       | $P\bar{3}m1(164)$ | —                 | 9.55  | 9.56  | 58.4               | —              | —     | —     | —     | —              | 0.985             | 2.050             | 8.1  | —           | —   | —   |
| CY <sub>2</sub>   | THX                       | $P\bar{3}m1(164)$ | —                 | 7.10  | 7.11  | 60.1               | —              | 7.10  | 7.11  | 60.1  | —              | 0.003             | 5.500             | 0.0  | 0.0         | —   | —   |
| CNb <sub>2</sub>  | TXX                       | $P\bar{3}m1(164)$ | —                 | 6.25  | 6.26  | 60.0               | —              | —     | —     | —     | —              | 3.403             | 8.561             | 0.0  | —           | —   | —   |
| CAg <sub>2</sub>  | HTX                       | $P\bar{3}m1(164)$ | —                 | 6.42  | 6.43  | 59.6               | —              | 6.13  | 6.11  | 59.7  | —              | 0.322             | 0.848             | 0.0  | 0.0         | —   | —   |
| CCs <sub>2</sub>  | PTH                       | $P\bar{3}m1(164)$ | $P\bar{3}m1(164)$ | 9.98  | 9.99  | 58.0               | —              | —     | —     | —     | 59.7           | 0.035             | 0.996             | 8.1  | —           | —   | 8.1 |
| CBa <sub>2</sub>  | TXX                       | $P\bar{3}m1(164)$ | —                 | 8.49  | 8.49  | 59.8               | —              | —     | —     | —     | —              | 1.533             | 2.727             | 0.0  | —           | —   | —   |
| CHF <sub>2</sub>  | TXX                       | $P\bar{3}m1(164)$ | —                 | 6.42  | 6.43  | 60.1               | —              | —     | —     | —     | —              | 6.411             | 8.695             | 0.0  | —           | —   | —   |
| CTa <sub>2</sub>  | TPX                       | $P\bar{3}m1(164)$ | $P\bar{1}(2)$     | 6.16  | 6.16  | 59.9               | —              | —     | —     | —     | —              | 0.107             | 3.898             | 0.0  | —           | —   | 0.0 |
| CPb <sub>2</sub>  | THX                       | $P\bar{3}m1(164)$ | —                 | 7.28  | 7.29  | 59.9               | —              | 7.15  | 7.16  | 59.8  | 54.3           | 0.592             | 3.316             | 0.0  | 0.0         | —   | —   |
| NLi <sub>2</sub>  | TPX                       | $P\bar{3}m1(164)$ | $P\bar{3}m1(164)$ | 6.31  | 6.33  | 59.6               | —              | —     | —     | —     | —              | 0.001             | 1.793             | 4.0  | —           | —   | 4.0 |
| NNa <sub>2</sub>  | PTH                       | $P\bar{3}m1(164)$ | $P\bar{3}m1(164)$ | 7.55  | 7.57  | 59.3               | —              | —     | —     | —     | —              | 0.044             | 1.432             | 4.0  | —           | —   | 4.0 |
| NK <sub>2</sub>   | TPX                       | $P\bar{3}m1(164)$ | —                 | 8.68  | 8.68  | 58.5               | —              | —     | —     | —     | —              | 0.972             | 3.156             | 4.0  | —           | —   | —   |
| NCa <sub>2</sub>  | TXX                       | $P\bar{3}m1(164)$ | —                 | 7.22  | 7.22  | 60.0               | —              | —     | —     | —     | —              | 2.863             | 3.023             | 0.0  | —           | —   | —   |
| NTi <sub>2</sub>  | TXX                       | $P\bar{3}m1(164)$ | —                 | 5.93  | 5.95  | 60.1               | —              | —     | —     | —     | —              | 3.872             | 9.483             | 4.7  | —           | —   | —   |
| NV <sub>2</sub>   | TXX                       | $P\bar{3}m1(164)$ | —                 | 5.75  | 5.76  | 60.0               | —              | —     | —     | —     | —              | 1.010             | 1.398             | 0.0  | —           | —   | —   |
| NCr <sub>2</sub>  | THX                       | $P\bar{3}m1(164)$ | —                 | 5.67  | 5.67  | 60.7               | —              | 5.25  | 5.22  | 59.6  | 33.3           | 0.144             | 3.984             | 7.2  | 0.0         | —   | —   |
| NNi <sub>2</sub>  | TPX                       | $P\bar{3}m1(164)$ | $Cmmm(65)$        | 5.64  | 5.65  | 59.5               | —              | —     | —     | —     | —              | 0.040             | 0.850             | 0.0  | —           | —   | 0.0 |
| NRb <sub>2</sub>  | TXX                       | $P\bar{3}m1(164)$ | —                 | 9.12  | 9.12  | 57.1               | —              | —     | —     | —     | —              | 0.850             | 1.934             | 4.1  | —           | —   | —   |
| NSr <sub>2</sub>  | TXX                       | $P\bar{3}m1(164)$ | —                 | 7.71  | 7.71  | 60.0               | —              | —     | —     | —     | —              | 2.541             | 4.094             | 0.0  | —           | —   | —   |
| NY <sub>2</sub>   | THX                       | $P\bar{3}m1(164)$ | —                 | 6.89  | 6.90  | 60.1               | —              | 6.89  | 6.89  | 60.0  | —              | 0.002             | 7.381             | 0.0  | 0.0         | —   | —   |
| NZr <sub>2</sub>  | TXX                       | $P\bar{3}m1(164)$ | —                 | 6.46  | 6.48  | 60.1               | —              | —     | —     | —     | —              | 3.576             | 9.888             | 0.0  | —           | —   | —   |

(Continued on next page)

(Continued from previous page)

Table 1: List of  $P\bar{3}m1(164)$ 

| species           | Initial structure indices | space group       |                   |                   | lattice parameters |       |       |                |       |       | relative energy |                |                   | spin moment       |      |     |      |
|-------------------|---------------------------|-------------------|-------------------|-------------------|--------------------|-------|-------|----------------|-------|-------|-----------------|----------------|-------------------|-------------------|------|-----|------|
|                   |                           | T                 | H                 | P                 | a [Å]              | b [Å] | c [Å] | $\gamma$ [deg] | a [Å] | b [Å] | c [Å]           | $\gamma$ [deg] | $\Delta E_1$ [eV] | $\Delta E_2$ [eV] | T    | H   | P    |
| NNb <sub>2</sub>  | THX                       | $P\bar{3}m1(164)$ | $P\bar{6}m2(187)$ | —                 | 6.29               | 6.29  | 6.29  | 60.1           | 5.86  | 5.84  | 59.9            | —              | 0.283             | 4.541             | 0.0  | 0.0 | —    |
| NCs <sub>2</sub>  | TPX                       | $P\bar{3}m1(164)$ | —                 | $P\bar{3}m1(164)$ | 9.48               | 9.47  | 56.1  | 60.1           | 9.40  | 9.14  | 58.2            | —              | 0.029             | 1.020             | 4.1  | —   | 4.0  |
| NHf <sub>2</sub>  | TXX                       | $P\bar{3}m1(164)$ | —                 | —                 | 6.34               | 6.36  | 60.1  | 60.1           | —     | —     | —               | —              | 3.563             | 4.401             | 0.0  | —   | —    |
| NTa <sub>2</sub>  | HTX                       | $P\bar{3}m1(164)$ | $P\bar{6}m2(187)$ | —                 | 6.16               | 6.17  | 60.0  | 60.0           | 5.79  | 5.78  | 59.9            | —              | 0.657             | 2.060             | 0.0  | —   | —    |
| NPb <sub>2</sub>  | HTP                       | $P\bar{3}m1(164)$ | $Cm(8)$           | —                 | 6.97               | 6.97  | 59.6  | 61.1           | 6.82  | 7.08  | 61.1            | —              | 0.027             | 0.306             | 0.0  | —   | —    |
| OLi <sub>2</sub>  | TXX                       | $P\bar{3}m1(164)$ | —                 | —                 | 6.19               | 6.21  | 60.0  | 60.0           | —     | —     | —               | —              | 1.274             | 3.622             | 0.0  | —   | —    |
| ONa <sub>2</sub>  | TPX                       | $P\bar{3}m1(164)$ | —                 | —                 | 7.52               | 7.53  | 59.4  | —              | —     | —     | —               | —              | 0.756             | 2.577             | 0.0  | —   | —    |
| OMg <sub>2</sub>  | PTX                       | $P\bar{3}m1(164)$ | —                 | —                 | 6.14               | 6.14  | 59.2  | —              | —     | —     | —               | —              | 0.770             | 1.747             | 0.0  | —   | —    |
| OK <sub>2</sub>   | TPX                       | $P\bar{3}m1(164)$ | —                 | —                 | 8.26               | 8.27  | 59.3  | —              | —     | —     | —               | —              | 0.294             | 1.823             | 0.0  | —   | —    |
| OSc <sub>2</sub>  | TXX                       | $P\bar{3}m1(164)$ | —                 | —                 | 6.38               | 6.39  | 60.0  | —              | —     | —     | —               | —              | 0.915             | 3.979             | 4.8  | —   | —    |
| OTi <sub>2</sub>  | HTX                       | $P\bar{3}m1(164)$ | $P\bar{6}m2(187)$ | —                 | 5.96               | 5.98  | 59.9  | —              | 5.60  | 5.60  | 59.9            | —              | 0.164             | 1.350             | 0.0  | —   | —    |
| OV <sub>2</sub>   | HTP                       | $P\bar{3}m1(164)$ | $P\bar{6}m2(187)$ | —                 | 5.32               | 5.30  | 59.9  | —              | 5.32  | 5.31  | 59.1            | —              | 0.555             | 0.671             | 0.0  | —   | —    |
| OCr <sub>2</sub>  | HTP                       | $P\bar{3}m1(164)$ | $P\bar{6}m2(187)$ | —                 | 5.74               | 5.73  | 59.9  | —              | 5.08  | 5.08  | 59.8            | —              | 0.403             | 0.650             | 0.0  | —   | —    |
| OFe <sub>2</sub>  | PHT                       | $P\bar{3}m1(164)$ | $P\bar{6}m2(187)$ | —                 | 5.37               | 5.37  | 59.8  | —              | 5.33  | 5.32  | 59.8            | —              | 0.083             | 0.553             | 26.4 | —   | 24.2 |
| ORb <sub>2</sub>  | TXX                       | $P\bar{3}m1(164)$ | —                 | —                 | 8.36               | 8.36  | —     | —              | —     | —     | —               | —              | 1.533             | 1.866             | 0.0  | —   | —    |
| ONb <sub>2</sub>  | HTX                       | $P\bar{3}m1(164)$ | $P\bar{6}m2(187)$ | —                 | 5.84               | 5.85  | 57.8  | —              | 5.83  | 5.83  | 58.3            | —              | 0.242             | 1.484             | 0.0  | —   | —    |
| OLn <sub>2</sub>  | THX                       | $P\bar{3}m1(164)$ | $P\bar{6}m2(187)$ | —                 | 6.64               | 6.63  | 60.2  | —              | 6.60  | 6.58  | 60.2            | —              | 0.488             | 2.401             | 0.0  | —   | —    |
| OCs <sub>2</sub>  | PTX                       | $C2/m(12)$        | —                 | —                 | 9.81               | 9.81  | 50.4  | —              | —     | —     | —               | —              | 0.733             | 1.339             | 0.0  | —   | —    |
| OTl <sub>2</sub>  | THX                       | $P\bar{3}m1(164)$ | $P\bar{6}m2(187)$ | —                 | 7.40               | 7.39  | 58.7  | —              | 7.17  | 7.16  | 59.4            | —              | 0.417             | 1.002             | 0.0  | —   | —    |
| FNa <sub>2</sub>  | PTH                       | $P\bar{3}m1(164)$ | $P\bar{6}m2(187)$ | —                 | 7.04               | 7.03  | 59.0  | —              | 6.84  | 6.85  | 59.1            | —              | 0.347             | 0.787             | 0.0  | —   | —    |
| FK <sub>2</sub>   | PTH                       | $P\bar{3}m1(164)$ | $P\bar{6}m2(187)$ | —                 | 8.42               | 8.42  | 56.0  | —              | 8.30  | 8.30  | 55.6            | —              | 0.070             | 0.574             | 0.0  | —   | —    |
| FRb <sub>2</sub>  | PTH                       | $P\bar{3}m1(164)$ | $C2/m(12)$        | —                 | 8.94               | 8.93  | 55.3  | —              | 10.25 | 10.22 | 46.2            | —              | 0.007             | 0.138             | 0.0  | —   | —    |
| FCd <sub>2</sub>  | THX                       | $P\bar{3}m1(164)$ | $P\bar{6}m2(187)$ | —                 | 6.19               | 6.19  | 60.2  | —              | 6.26  | 6.25  | 56.7            | —              | 0.085             | 1.061             | 0.0  | —   | —    |
| FLn <sub>2</sub>  | THX                       | $P\bar{3}m1(164)$ | $P\bar{6}m2(187)$ | —                 | 6.56               | 6.56  | —     | —              | 6.54  | 6.54  | 60.1            | —              | 0.072             | 1.818             | 0.0  | —   | —    |
| FTl <sub>2</sub>  | THX                       | $P\bar{3}m1(164)$ | $P\bar{6}m2(187)$ | —                 | 7.19               | 7.19  | 58.3  | —              | 7.08  | 7.07  | 59.0            | —              | 0.183             | 2.788             | 0.0  | —   | —    |
| NaN <sub>2</sub>  | THP                       | $P\bar{3}m1(164)$ | $P\bar{6}m2(187)$ | —                 | 8.21               | 8.27  | 59.1  | —              | 7.59  | 7.59  | 56.0            | —              | 0.466             | 0.542             | 20.0 | —   | 20.0 |
| MgF <sub>2</sub>  | PTX                       | $P\bar{3}m1(164)$ | —                 | —                 | 6.29               | 6.29  | 59.8  | —              | —     | —     | —               | —              | 0.003             | 3.879             | 0.0  | —   | —    |
| MgCl <sub>2</sub> | TPX                       | $P\bar{3}m1(164)$ | —                 | —                 | 7.42               | 7.42  | 59.5  | —              | —     | —     | —               | —              | 0.049             | 2.430             | 0.0  | —   | —    |
| MgBr <sub>2</sub> | TPX                       | $P\bar{3}m1(164)$ | —                 | —                 | 7.81               | 7.82  | 59.5  | —              | —     | —     | —               | —              | 0.005             | 2.072             | 0.0  | —   | —    |
| MgI <sub>2</sub>  | THX                       | $P\bar{3}m1(164)$ | $P\bar{3}m1(164)$ | —                 | 8.44               | 8.45  | 59.5  | —              | 8.44  | 8.44  | 59.5            | —              | 0.002             | 1.141             | 0.0  | —   | —    |
| AlO <sub>2</sub>  | TXX                       | $P\bar{3}m1(164)$ | —                 | —                 | 5.71               | 5.71  | 64.4  | —              | —     | —     | —               | —              | 2.061             | 2.775             | 4.0  | —   | —    |
| AlAl <sub>2</sub> | THX                       | $P\bar{3}m1(164)$ | $P4/mmm(123)$     | —                 | 5.51               | 5.51  | 62.7  | —              | 5.48  | 5.48  | 87.5            | —              | 0.676             | 6.286             | 0.0  | —   | —    |
| SiO <sub>2</sub>  | THP                       | $P\bar{3}m1(164)$ | $P\bar{3}m1(164)$ | —                 | 5.41               | 5.41  | 60.0  | —              | 5.41  | 5.41  | 60.0            | —              | 0.010             | 0.562             | 0.0  | —   | —    |
| SiS <sub>2</sub>  | THX                       | $P\bar{3}m1(164)$ | $P\bar{4}m2(115)$ | —                 | 6.62               | 6.62  | 60.0  | —              | 9.57  | 6.78  | 45.1            | —              | 0.016             | 2.884             | 0.0  | —   | —    |
| SiCa <sub>2</sub> | PTX                       | $P\bar{3}m1(164)$ | —                 | —                 | 9.44               | 9.44  | 59.8  | —              | —     | —     | —               | —              | 0.000             | 2.665             | 0.0  | —   | —    |
| SiSr <sub>2</sub> | PTX                       | $P\bar{3}m1(164)$ | —                 | —                 | 9.90               | 9.90  | 59.6  | —              | —     | —     | —               | —              | 0.003             | 2.382             | 0.0  | —   | —    |
| SiLi <sub>2</sub> | TPX                       | $P\bar{3}m1(164)$ | —                 | —                 | 8.37               | 8.37  | 60.4  | —              | —     | —     | —               | —              | 0.482             | 0.976             | 0.0  | —   | —    |
| SiCs <sub>2</sub> | PTX                       | $P\bar{3}m1(164)$ | —                 | —                 | 11.81              | 11.79 | 58.3  | —              | —     | —     | —               | —              | 0.013             | 1.126             | 8.0  | —   | 8.0  |
| SiBa <sub>2</sub> | PTX                       | $P\bar{3}m1(164)$ | —                 | —                 | 10.28              | 10.27 | 59.0  | —              | —     | —     | —               | —              | 0.013             | 1.590             | 0.0  | —   | —    |
| SiPb <sub>2</sub> | HPT                       | $P\bar{3}m1(164)$ | $P\bar{6}m2(187)$ | —                 | 8.80               | 8.80  | 58.1  | —              | 8.38  | 8.38  | 57.9            | —              | 0.653             | 0.740             | 0.0  | —   | —    |
| PS <sub>2</sub>   | TXX                       | $P\bar{3}m1(164)$ | —                 | —                 | 6.59               | 6.59  | 60.0  | —              | —     | —     | —               | —              | 1.396             | 1.559             | 0.0  | —   | —    |
| PK <sub>2</sub>   | PTX                       | $P\bar{3}m1(164)$ | —                 | —                 | 10.24              | 10.24 | 58.2  | —              | —     | —     | —               | —              | 0.031             | 1.049             | 4.0  | —   | 4.0  |
| PCa <sub>2</sub>  | PTX                       | $P\bar{3}m1(164)$ | —                 | —                 | 8.42               | 8.42  | 59.9  | —              | —     | —     | —               | —              | 0.082             | 1.612             | 0.0  | —   | —    |
| PFe <sub>2</sub>  | THX                       | $P\bar{3}m1(164)$ | $P\bar{6}m2(187)$ | —                 | 7.94               | 7.94  | 60.0  | —              | 5.69  | 5.67  | 59.9            | —              | 0.202             | 1.151             | 18.0 | —   | —    |
| PSe <sub>2</sub>  | TXX                       | $P\bar{3}m1(164)$ | —                 | —                 | 6.99               | 6.99  | 60.0  | —              | —     | —     | —               | —              | 0.943             | 2.920             | 0.0  | —   | —    |
| PRb <sub>2</sub>  | TPX                       | $P\bar{3}m1(164)$ | —                 | —                 | 10.75              | 10.76 | 58.1  | —              | —     | —     | —               | —              | 0.295             | 0.931             | 4.0  | —   | 4.0  |
| PSr <sub>2</sub>  | PTX                       | $P\bar{3}m1(164)$ | —                 | —                 | 8.94               | 8.94  | 59.4  | —              | —     | —     | —               | —              | 0.005             | 1.668             | 0.0  | —   | —    |
| PY <sub>2</sub>   | TPX                       | $P\bar{3}m1(164)$ | —                 | —                 | 7.63               | 7.63  | 60.0  | —              | —     | —     | —               | —              | 0.037             | 2.802             | 0.0  | —   | —    |
| PSn <sub>2</sub>  | THX                       | $P\bar{3}m1(164)$ | $P\bar{6}m2(187)$ | —                 | 7.39               | 7.39  | 59.6  | —              | 7.52  | 7.52  | 59.9            | —              | 0.222             | 1.592             | 0.0  | —   | —    |
| PTe <sub>2</sub>  | TXX                       | $P\bar{3}m1(164)$ | —                 | —                 | 7.50               | 7.51  | 59.8  | —              | —     | —     | —               | —              | 1.708             | 1.971             | 0.0  | —   | —    |
| PCs <sub>2</sub>  | PTX                       | $P\bar{3}m1(164)$ | —                 | —                 | 11.24              | 11.25 | 58.4  | —              | —     | —     | —               | —              | 0.013             | 0.944             | 4.0  | —   | 4.0  |
| PBa <sub>2</sub>  | PTX                       | $P\bar{3}m1(164)$ | —                 | —                 | 9.32               | 9.31  | 59.4  | —              | —     | —     | —               | —              | 0.103             | 1.678             | 0.0  | —   | —    |
| PTl <sub>2</sub>  | TPH                       | $P\bar{3}m1(164)$ | $P\bar{6}m2(187)$ | —                 | 8.73               | 8.73  | 59.5  | —              | 8.33  | 8.33  | 59.3            | —              | 0.359             | 0.726             | 0.0  | —   | —    |
| PPb <sub>2</sub>  | THX                       | $P\bar{3}m1(164)$ | $P\bar{6}m2(187)$ | —                 | 7.71               | 7.72  | 59.6  | —              | 7.93  | 7.92  | 59.4            | —              | 0.271             | 1.080             | 0.0  | —   | —    |
| SLi <sub>2</sub>  | TPX                       | $P\bar{3}m1(164)$ | —                 | —                 | 7.89               | 7.87  | 59.8  | —              | —     | —     | —               | —              | 0.025             | 2.651             | 0.0  | —   | —    |
| SNa <sub>2</sub>  | PTX                       | $P\bar{3}m1(164)$ | —                 | —                 | 9.01               | 9.02  | 59.5  | —              | —     | —     | —               | —              | 0.033             | 2.464             | 0.0  | —   | —    |
| SK <sub>2</sub>   | PTX                       | $P\bar{3}m1(164)$ | —                 | —                 | 10.17              | 10.17 | 57.5  | —              | —     | —     | —               | —              | 0.063             | 1.948             | 0.0  | —   | —    |

(Continued on next page)

Table 1: List of  $P\bar{3}m1(164)$ 

| species | Initial structure indices | space group       |                   |                   | lattice parameters |       |       |                |       |       | relative energy |                |                   | spin moment       |      |      |      |
|---------|---------------------------|-------------------|-------------------|-------------------|--------------------|-------|-------|----------------|-------|-------|-----------------|----------------|-------------------|-------------------|------|------|------|
|         |                           | T                 | H                 | P                 | a [Å]              | b [Å] | c [Å] | $\gamma$ [deg] | a [Å] | b [Å] | c [Å]           | $\gamma$ [deg] | $\Delta E_1$ [eV] | $\Delta E_2$ [eV] | T    | H    | P    |
| SCa2    | THX                       | $P\bar{3}m1(164)$ | $P\bar{6}m2(187)$ | —                 | 7.82               | 7.81  | 60.0  | 59.8           | 7.73  | 7.73  | 7.73            | 59.8           | 0.798             | 2.382             | 0.4  | 0.0  | —    |
| SSc2    | TPH                       | $P\bar{3}m1(164)$ | $P\bar{6}m2(187)$ | $P\bar{3}m1(156)$ | 7.04               | 7.03  | 60.0  | 60.0           | 6.79  | 6.79  | 6.79            | 60.0           | 0.224             | 0.717             | 0.0  | 0.0  | 0.0  |
| SIRb2   | PTX                       | $P\bar{3}m1(164)$ | —                 | $P\bar{3}m1(164)$ | 10.37              | 10.37 | 59.1  | 59.1           | —     | —     | —               | —              | 0.019             | 1.635             | 0.0  | 0.0  | 0.0  |
| SSr2    | TXX                       | $P\bar{3}m1(164)$ | —                 | —                 | 8.35               | 8.35  | 59.7  | 59.7           | —     | —     | —               | —              | 0.977             | 2.337             | 0.0  | —    | —    |
| SV2     | PTX                       | $P\bar{3}m1(164)$ | —                 | $P1(2)$           | 7.49               | 7.49  | 59.9  | 59.9           | —     | —     | —               | —              | 0.273             | 1.130             | 0.0  | 0.0  | 0.0  |
| SSn2    | TPH                       | $P\bar{3}m1(164)$ | $P\bar{6}m2(187)$ | $P1(1)$           | 7.14               | 7.16  | 59.7  | 59.7           | 7.02  | 7.02  | 7.02            | 59.1           | 0.037             | 0.309             | 0.0  | 0.0  | 0.0  |
| SCs2    | PTX                       | $P\bar{3}m1(164)$ | —                 | $P\bar{3}m1(164)$ | 10.67              | 10.69 | 58.8  | 58.8           | —     | —     | —               | —              | 0.020             | 1.312             | 0.0  | 0.0  | 0.0  |
| SBa2    | TXX                       | $P\bar{3}m1(164)$ | —                 | —                 | 8.84               | 8.84  | 59.6  | 59.6           | —     | —     | —               | —              | 1.845             | 2.529             | 0.0  | —    | —    |
| STl2    | TPH                       | $P\bar{3}m1(164)$ | $P\bar{6}m2(187)$ | $P\bar{3}m1(164)$ | 8.54               | 8.54  | 59.0  | 59.0           | 8.33  | 8.33  | 8.33            | 59.4           | 0.008             | 0.169             | 0.0  | 0.0  | 0.0  |
| SPb2    | PHT                       | $P\bar{3}m1(164)$ | $Pmnm(59)$        | $P2_1/m(11)$      | 7.45               | 7.44  | 59.7  | 59.7           | 7.54  | 6.88  | 56.4            | 56.4           | 0.289             | 0.527             | 0.0  | 0.0  | 0.0  |
| ClK2    | TPH                       | $P\bar{3}m1(164)$ | $P\bar{6}m2(187)$ | $P2_1/m(11)$      | 9.24               | 9.26  | 57.9  | 57.9           | 9.08  | 9.10  | 57.3            | 57.3           | 0.130             | 0.236             | 0.0  | 0.0  | 0.0  |
| ClC2    | THX                       | $P\bar{3}m1(164)$ | $P\bar{6}m2(187)$ | —                 | 7.63               | 7.62  | 59.7  | 59.7           | 7.59  | 7.59  | 7.59            | 59.7           | 0.303             | 1.497             | 0.0  | 0.0  | —    |
| ClRb2   | THP                       | $P\bar{3}m1(164)$ | $P\bar{6}m2(187)$ | $P1(1)$           | 8.25               | 8.23  | 58.0  | 58.0           | 9.69  | 9.71  | 56.6            | 56.6           | 0.278             | 0.393             | 0.0  | 0.0  | 0.0  |
| ClSr2   | THX                       | $P\bar{3}m1(164)$ | $P\bar{6}m2(187)$ | —                 | 8.25               | 8.24  | 59.6  | 59.6           | 8.33  | 8.33  | 8.33            | 57.7           | 0.343             | 2.532             | 0.0  | 0.0  | —    |
| ClY2    | HPT                       | $P\bar{3}m1(164)$ | $P\bar{6}m2(187)$ | $P2_1,2_1,2(18)$  | 7.08               | 7.08  | 60.1  | 60.1           | 7.05  | 7.04  | 60.1            | 60.1           | 0.622             | 0.748             | 0.0  | 0.0  | 0.0  |
| ClIn2   | THP                       | $P\bar{3}m1(164)$ | $P\bar{6}m2(187)$ | $P1(1)$           | 7.02               | 7.02  | 60.6  | 60.6           | 6.97  | 6.98  | 60.4            | 60.4           | 0.043             | 0.467             | 0.0  | 0.0  | 0.0  |
| ClCs2   | TPH                       | $P\bar{3}m1(164)$ | $Amm2(38)$        | $P1(1)$           | 10.58              | 10.58 | 56.8  | 56.8           | 10.64 | 10.65 | 54.1            | 54.1           | 0.183             | 0.436             | 0.0  | 0.0  | 0.0  |
| ClBa2   | TPH                       | $P\bar{3}m1(164)$ | $P\bar{6}m2(187)$ | $Pmna(53)$        | 8.71               | 8.71  | 59.9  | 59.9           | 8.57  | 8.57  | 8.57            | 59.8           | 0.026             | 0.085             | 0.0  | 0.0  | 0.9  |
| ClTl2   | THX                       | $P\bar{3}m1(164)$ | $Amm2(38)$        | —                 | 7.71               | 7.69  | 57.7  | 57.7           | 7.69  | 7.67  | 7.67            | 55.8           | 0.235             | 2.120             | 0.0  | 0.0  | —    |
| KN2     | TPX                       | $P\bar{3}m1(164)$ | —                 | $P6/mmm(191)$     | 9.79               | 10.30 | 58.5  | 58.5           | —     | —     | —               | —              | 0.006             | 1.103             | 20.0 | —    | 20.0 |
| CaF2    | PTX                       | $P\bar{3}m1(164)$ | —                 | $P\bar{3}m1(164)$ | 7.24               | 7.25  | 60.0  | 60.0           | —     | —     | —               | —              | 0.028             | 3.153             | 0.0  | 0.0  | 0.0  |
| CaCl2   | PTX                       | $P\bar{3}m1(164)$ | —                 | $P\bar{3}m1(164)$ | 8.29               | 8.29  | 60.0  | 60.0           | —     | —     | —               | —              | 0.001             | 1.980             | 0.0  | 0.0  | 0.0  |
| CaBr2   | PTX                       | $P\bar{3}m1(164)$ | —                 | $P\bar{3}m1(164)$ | 8.62               | 8.61  | 59.4  | 59.4           | —     | —     | —               | —              | 0.005             | 1.548             | 0.0  | 0.0  | 0.0  |
| CaI2    | PTX                       | $P\bar{3}m1(164)$ | —                 | $P\bar{3}m1(164)$ | 9.13               | 9.14  | 59.4  | 59.4           | —     | —     | —               | —              | 0.005             | 1.259             | 0.0  | 0.0  | 0.0  |
| ScBr2   | HTX                       | $P\bar{3}m1(164)$ | $P\bar{6}m2(187)$ | —                 | 7.61               | 7.61  | 59.4  | 59.4           | 7.43  | 7.42  | 7.42            | 59.9           | 0.156             | 2.274             | 0.0  | 3.8  | —    |
| ScTe2   | PTX                       | $P\bar{3}m1(164)$ | $P\bar{6}m2(187)$ | $P1(2)$           | 7.92               | 7.54  | 58.5  | 58.5           | —     | —     | —               | —              | 0.464             | 2.029             | 0.0  | 0.0  | 0.0  |
| ScI2    | THX                       | $P\bar{3}m1(164)$ | $P\bar{6}m2(187)$ | —                 | 8.16               | 8.16  | 59.9  | 59.9           | 8.00  | 7.99  | 8.00            | 59.9           | 0.125             | 0.956             | 0.0  | 3.7  | —    |
| TiS2    | TXX                       | $P\bar{3}m1(164)$ | —                 | —                 | 6.80               | 6.79  | 60.0  | 60.0           | —     | —     | —               | —              | 1.138             | 1.607             | 0.0  | —    | —    |
| TiSe2   | TPH                       | $P\bar{3}m1(164)$ | —                 | $P\bar{3}m1(164)$ | 7.01               | 6.99  | 59.8  | 59.8           | —     | —     | —               | —              | 0.001             | 1.296             | 0.0  | 0.0  | 0.0  |
| TiTe2   | PTX                       | $P\bar{3}m1(164)$ | —                 | $P\bar{3}m1(164)$ | 7.51               | 7.50  | 59.8  | 59.8           | —     | —     | —               | —              | 0.046             | 1.148             | 0.0  | 0.0  | 0.0  |
| VF2     | PTX                       | $P\bar{3}m1(164)$ | —                 | $P\bar{3}m1(164)$ | 6.43               | 6.45  | 60.0  | 60.0           | —     | —     | —               | —              | 0.014             | 2.829             | 12.0 | —    | 12.0 |
| VS2     | HPT                       | $P\bar{3}m1(164)$ | $P\bar{6}m2(187)$ | $P\bar{3}m1(164)$ | 6.35               | 6.34  | 59.9  | 59.9           | 6.34  | 6.34  | 6.34            | 60.0           | 0.327             | 0.329             | 1.9  | 3.7  | 1.9  |
| VCl2    | PTX                       | $P\bar{3}m1(164)$ | —                 | $P\bar{3}m1(164)$ | 7.21               | 7.21  | 59.8  | 59.8           | —     | —     | —               | —              | 0.001             | 1.961             | 12.0 | —    | 12.0 |
| VSe2    | HPT                       | $P\bar{3}m1(164)$ | $P\bar{6}m2(187)$ | —                 | 6.61               | 6.61  | 59.9  | 59.9           | 6.64  | 6.63  | 6.63            | 60.0           | 0.333             | 0.335             | 2.3  | 3.9  | 2.3  |
| VBr2    | TPX                       | $P\bar{3}m1(164)$ | —                 | $P\bar{3}m1(164)$ | 7.58               | 7.58  | 60.0  | 60.0           | —     | —     | —               | —              | 0.007             | 1.825             | 12.0 | —    | 12.0 |
| VI2     | TXX                       | $P\bar{3}m1(164)$ | —                 | —                 | 8.17               | 8.18  | 59.9  | 59.9           | —     | —     | —               | —              | 1.407             | 3.176             | 12.0 | —    | —    |
| CrO2    | HPT                       | $P\bar{3}m1(164)$ | $P\bar{6}m2(187)$ | —                 | 5.74               | 5.73  | 60.0  | 60.0           | 5.23  | 5.23  | 5.23            | 60.0           | 0.416             | 0.437             | 8.0  | 0.0  | 8.0  |
| CrSe2   | TPH                       | $P\bar{3}m1(164)$ | $P\bar{6}m2(187)$ | $P2_1/m(11)$      | 6.86               | 6.81  | 59.5  | 59.5           | 6.76  | 6.75  | 59.8            | 59.8           | 0.016             | 0.811             | 8.6  | 8.0  | 8.6  |
| CrCs2   | THX                       | $P\bar{3}m1(164)$ | $Amm2(38)$        | —                 | 11.35              | 11.40 | 58.3  | 58.3           | 11.95 | 11.92 | 11.92           | 48.4           | 0.599             | 2.505             | 22.1 | 21.2 | —    |
| MnO2    | PTX                       | $P\bar{3}m1(164)$ | —                 | $P\bar{3}m1(164)$ | 5.75               | 5.75  | 60.0  | 60.0           | —     | —     | —               | —              | 0.014             | 4.768             | 12.0 | —    | 12.0 |
| MnF2    | TPX                       | $P\bar{3}m1(164)$ | —                 | $P\bar{3}m1(164)$ | 6.73               | 6.73  | 59.8  | 59.8           | —     | —     | —               | —              | 0.004             | 2.553             | 20.0 | —    | 20.0 |
| MnS2    | PTX                       | $P\bar{3}m1(164)$ | —                 | $P\bar{3}m1(164)$ | 6.70               | 6.71  | 60.1  | 60.1           | —     | —     | —               | —              | 0.003             | 1.757             | 11.8 | —    | 11.8 |
| MnCl2   | TXX                       | $P\bar{3}m1(164)$ | —                 | —                 | 7.45               | 7.46  | 59.8  | 59.8           | —     | —     | —               | —              | 0.942             | 1.647             | 20.0 | —    | —    |
| MnSe2   | TXX                       | $P\bar{3}m1(164)$ | —                 | —                 | 7.02               | 7.03  | 60.0  | 60.0           | —     | —     | —               | —              | 1.765             | 2.984             | 11.5 | —    | —    |
| MnBr2   | TXX                       | $P\bar{3}m1(164)$ | —                 | —                 | 7.79               | 7.80  | 59.8  | 59.8           | —     | —     | —               | —              | 0.941             | 1.621             | 20.0 | —    | —    |
| MnAu2   | HTX                       | $P\bar{3}m1(164)$ | $P4/mmm(123)$     | —                 | 5.96               | 5.96  | 59.3  | 59.3           | 6.68  | 6.68  | 6.68            | 52.5           | 0.711             | 3.227             | 17.2 | 18.0 | —    |
| FeO2    | PTX                       | $P\bar{3}m1(164)$ | —                 | $P\bar{3}m1(164)$ | 5.58               | 5.58  | 60.0  | 60.0           | —     | —     | —               | —              | 0.005             | 3.965             | 8.0  | 8.0  | 8.0  |
| FeF2    | TPH                       | $P\bar{3}m1(164)$ | $P\bar{6}m2(187)$ | $P\bar{3}m1(164)$ | 6.35               | 6.39  | 59.6  | 59.6           | 5.85  | 5.86  | 59.7            | 59.7           | 0.001             | 0.566             | 16.0 | 16.0 | 16.0 |
| FeS2    | THX                       | $P\bar{3}m1(164)$ | $P\bar{6}m2(187)$ | —                 | 6.37               | 6.40  | 60.2  | 60.2           | 6.31  | 6.30  | 6.30            | 60.0           | 0.666             | 1.421             | 7.1  | 5.9  | —    |
| CoO2    | TPX                       | $P\bar{3}m1(164)$ | —                 | $P\bar{3}m1(164)$ | 5.65               | 5.64  | 59.7  | 59.7           | —     | —     | —               | —              | 0.010             | 5.514             | 3.3  | 3.3  | 3.3  |
| CoF2    | PTX                       | $P\bar{3}m1(164)$ | —                 | $P\bar{3}m1(164)$ | 6.30               | 6.30  | 59.3  | 59.3           | —     | —     | —               | —              | 0.032             | 2.104             | 12.0 | —    | 12.0 |
| CoBr2   | TXX                       | $P\bar{3}m1(164)$ | —                 | $P\bar{3}m1(164)$ | 7.47               | 7.48  | 59.6  | 59.6           | —     | —     | —               | —              | 1.436             | 2.428             | 11.9 | —    | —    |
| NiB2    | THX                       | $P\bar{3}m1(164)$ | $P4/mmm(123)$     | —                 | 7.41               | 6.38  | 29.8  | 29.8           | 5.12  | 7.26  | 44.9            | 44.9           | 0.315             | 6.864             | 0.0  | 0.0  | —    |
| NiO2    | THX                       | $P\bar{3}m1(164)$ | $P\bar{3}m1(164)$ | —                 | 5.67               | 5.67  | 59.7  | 59.7           | 5.69  | 5.67  | 59.8            | 59.8           | 0.002             | 2.454             | 0.0  | 0.0  | —    |
| NiS2    | TXX                       | $P\bar{3}m1(164)$ | —                 | —                 | 6.72               | 6.72  | 59.7  | 59.7           | —     | —     | —               | —              | 1.559             | 1.922             | 0.0  | —    | —    |
| NiSe2   | HPT                       | $P\bar{3}m1(164)$ | $P\bar{6}m2(187)$ | —                 | 7.47               | 7.51  | 59.4  | 59.4           | 6.82  | 6.85  | 59.7            | 59.7           | 0.008             | 0.030             | 0.0  | 0.0  | 0.0  |
| NiSe2   | PTX                       | $P\bar{3}m1(164)$ | —                 | $P\bar{3}m1(164)$ | 7.16               | 7.18  | 58.9  | 58.9           | —     | —     | —               | —              | 0.016             | 1.992             | 0.0  | —    | 0.0  |

(Continued on next page)

(Continued from previous page)

Table 1: List of  $P\bar{3}m1(164)$ 

| species           | Initial structure indices | space group       |                   |   | lattice parameters |       |       |                |                |                | relative energy   |                   |       | spin moment |     |     |
|-------------------|---------------------------|-------------------|-------------------|---|--------------------|-------|-------|----------------|----------------|----------------|-------------------|-------------------|-------|-------------|-----|-----|
|                   |                           | T                 | H                 | P | a [Å]              | b [Å] | c [Å] | $\gamma$ [deg] | $\gamma$ [deg] | $\gamma$ [deg] | $\Delta E_1$ [eV] | $\Delta E_2$ [eV] | T     | H           | P   |     |
| NiBr <sub>2</sub> | TXX                       | $P\bar{3}m1(164)$ | -                 | - | 7.40               | 7.39  | 59.6  | -              | -              | -              | 1.535             | 1.574             | 8.0   | -           | -   | -   |
| NiY <sub>2</sub>  | TPX                       | $P\bar{3}m1(164)$ | -                 | - | 8.04               | 8.08  | 59.7  | -              | -              | -              | 0.002             | 0.841             | 0.0   | -           | -   | 0.0 |
| NiI <sub>2</sub>  | TXX                       | $P\bar{3}m1(164)$ | -                 | - | 7.96               | 7.95  | 59.6  | -              | -              | -              | 2.497             | 3.016             | 7.8   | -           | -   | -   |
| GeO <sub>2</sub>  | THX                       | $P\bar{3}m1(164)$ | $P\bar{3}m1(164)$ | - | 5.81               | 5.81  | 60.0  | 60.0           | -              | -              | 0.005             | 2.317             | 0.0   | 0.0         | -   | -   |
| GeMg <sub>2</sub> | P <sub>3</sub> TX         | $P\bar{3}m1(164)$ | -                 | - | 8.89               | 8.90  | 59.6  | -              | -              | -              | 9.01              | 8.04              | 8.04  | 0.0         | 0.0 | 0.0 |
| GeCl <sub>2</sub> | TPX                       | $P\bar{3}m1(164)$ | -                 | - | 7.86               | 7.86  | 60.6  | -              | -              | -              | 8.29              | 8.29              | 8.29  | 0.0         | 0.0 | 0.0 |
| GeCa <sub>2</sub> | P <sub>3</sub> TX         | $P\bar{3}m1(164)$ | -                 | - | 9.50               | 9.50  | 59.6  | -              | -              | -              | 9.43              | 9.44              | 9.44  | 0.0         | 0.0 | 0.0 |
| GeSe <sub>2</sub> | HTX                       | $P\bar{3}m1(164)$ | $C222(21)$        | - | 7.28               | 7.28  | 59.7  | 78.8           | -              | -              | 8.16              | 7.06              | 7.06  | 0.0         | 0.0 | 0.0 |
| GeBr <sub>2</sub> | P <sub>3</sub> TX         | $P\bar{3}m1(164)$ | -                 | - | 8.10               | 8.10  | 60.6  | -              | -              | -              | 9.86              | 9.87              | 9.87  | 0.0         | 0.0 | 0.0 |
| GeSr <sub>2</sub> | P <sub>3</sub> TX         | $P\bar{3}m1(164)$ | -                 | - | 9.92               | 9.92  | 59.6  | -              | -              | -              | 0.761             | 0.863             | 0.0   | 0.0         | 0.0 | 0.0 |
| GeCd <sub>2</sub> | HTX                       | $P\bar{3}m1(164)$ | $Amm2(38)$        | - | 9.08               | 9.08  | 59.8  | 38.0           | -              | -              | 9.44              | 9.40              | 9.40  | 0.0         | 0.0 | 0.0 |
| GeTe <sub>2</sub> | TPX                       | $P\bar{3}m1(164)$ | -                 | - | 7.84               | 7.84  | 59.0  | -              | -              | -              | 10.16             | 11.60             | 11.60 | 8.0         | 5.3 | 8.0 |
| GeCs <sub>2</sub> | P <sub>3</sub> TH         | $P\bar{3}m1(164)$ | $Amm2(38)$        | - | 11.87              | 11.83 | 58.2  | 48.6           | -              | -              | 6.59              | 10.23             | 10.23 | 0.0         | 0.0 | 0.0 |
| GeBa <sub>2</sub> | P <sub>3</sub> TX         | $P\bar{3}m1(164)$ | -                 | - | 10.28              | 10.28 | 59.2  | -              | -              | -              | 8.71              | 8.73              | 8.73  | 0.0         | 0.0 | 0.0 |
| AsS <sub>2</sub>  | TPX                       | $P\bar{3}m1(164)$ | -                 | - | 7.00               | 7.01  | 59.5  | -              | -              | -              | 9.13              | 9.21              | 9.21  | 0.0         | 0.0 | 0.0 |
| AsCa <sub>2</sub> | P <sub>3</sub> TX         | $P\bar{3}m1(164)$ | -                 | - | 8.66               | 8.68  | 59.8  | -              | -              | -              | 10.35             | 10.34             | 10.34 | 0.0         | 0.0 | 0.0 |
| AsSe <sub>2</sub> | TXX                       | $P\bar{3}m1(164)$ | -                 | - | 7.33               | 7.34  | 59.3  | -              | -              | -              | 1.290             | 1.502             | 0.0   | -           | -   | -   |
| AsSr <sub>2</sub> | P <sub>3</sub> TX         | $P\bar{3}m1(164)$ | -                 | - | 9.11               | 9.12  | 60.0  | -              | -              | -              | 0.071             | 0.233             | 0.0   | 0.0         | 0.0 | 0.0 |
| AsPd <sub>2</sub> | H <sub>3</sub> TP         | $C2/m(12)$        | $Pmn21(31)$       | - | 8.55               | 8.54  | 40.6  | 65.1           | -              | -              | 11.44             | 11.32             | 11.32 | 4.0         | -   | 4.0 |
| AsSn <sub>2</sub> | P <sub>3</sub> TH         | $P\bar{3}m1(164)$ | $P3m1(164)$       | - | 7.43               | 7.39  | 59.4  | 59.2           | -              | -              | 8.60              | 8.60              | 8.60  | 0.0         | 0.0 | 0.0 |
| AsTe <sub>2</sub> | TXX                       | $P\bar{3}m1(164)$ | -                 | - | 7.81               | 7.78  | 58.8  | -              | -              | -              | 7.95              | 9.70              | 9.70  | 0.0         | 0.0 | 0.0 |
| AsCs <sub>2</sub> | TPX                       | $P\bar{3}m1(164)$ | -                 | - | 11.37              | 11.31 | 59.6  | -              | -              | -              | 8.00              | 7.99              | 7.99  | 0.0         | 0.0 | 0.0 |
| AsBa <sub>2</sub> | TPX                       | $P\bar{3}m1(164)$ | -                 | - | 9.46               | 9.52  | 60.2  | -              | -              | -              | 10.72             | 10.71             | 10.71 | 0.0         | 0.0 | 0.0 |
| AsI <sub>2</sub>  | TPX                       | $P\bar{3}m1(164)$ | -                 | - | 8.32               | 8.31  | 59.8  | -              | -              | -              | 8.53              | 8.53              | 8.53  | 0.0         | 0.0 | 0.0 |
| SeNa <sub>2</sub> | TXX                       | $P\bar{3}m1(164)$ | -                 | - | 9.39               | 9.40  | 59.6  | -              | -              | -              | 7.39              | 7.38              | 7.38  | 0.0         | 0.0 | 0.0 |
| SeS <sub>2</sub>  | P <sub>3</sub> TX         | $P\bar{3}m1(164)$ | -                 | - | 7.14               | 7.14  | 60.3  | -              | -              | -              | 7.98              | 7.97              | 7.97  | 0.0         | 0.0 | 0.0 |
| SeK <sub>2</sub>  | P <sub>3</sub> TX         | $P\bar{3}m1(164)$ | -                 | - | 10.65              | 10.65 | 57.2  | -              | -              | -              | 9.50              | 8.02              | 8.02  | 0.0         | 0.0 | 0.0 |
| SeCa <sub>2</sub> | THX                       | $P\bar{3}m1(164)$ | $P\bar{6}m2(187)$ | - | 8.06               | 8.06  | 60.0  | 59.8           | -              | -              | 10.35             | 10.34             | 10.34 | 0.0         | 0.0 | 0.0 |
| SeSe <sub>2</sub> | TXX                       | $P\bar{3}m1(164)$ | -                 | - | 7.47               | 7.47  | 60.3  | -              | -              | -              | 0.534             | 1.206             | 0.0   | -           | -   | -   |
| SeRb <sub>2</sub> | TPX                       | $P\bar{3}m1(164)$ | -                 | - | 10.88              | 10.87 | 58.8  | -              | -              | -              | 0.859             | 2.830             | 0.0   | -           | -   | -   |
| SeSr <sub>2</sub> | THX                       | $P\bar{3}m1(164)$ | $P\bar{6}m2(187)$ | - | 8.59               | 8.58  | 59.5  | 59.4           | -              | -              | 10.72             | 10.71             | 10.71 | 0.0         | 0.0 | 0.0 |
| SeY <sub>2</sub>  | H <sub>3</sub> TP         | $P\bar{3}m1(164)$ | $P\bar{6}m2(187)$ | - | 7.66               | 7.65  | 60.0  | 60.6           | -              | -              | 8.63              | 8.63              | 8.63  | 0.0         | 0.0 | 0.0 |
| SeIn <sub>2</sub> | HTX                       | $P\bar{3}m1(164)$ | $P\bar{6}m2(187)$ | - | 8.13               | 8.11  | 60.6  | -              | -              | -              | 7.53              | 7.53              | 7.53  | 0.0         | 0.0 | 0.0 |
| SeCs <sub>2</sub> | TPX                       | $P\bar{3}m1(164)$ | -                 | - | 11.22              | 11.19 | 58.8  | -              | -              | -              | 11.06             | 11.04             | 11.04 | 0.0         | 0.0 | 0.0 |
| SeBa <sub>2</sub> | TXX                       | $P\bar{3}m1(164)$ | -                 | - | 9.11               | 9.10  | 59.5  | -              | -              | -              | 11.06             | 11.04             | 11.04 | 0.0         | 0.0 | 0.0 |
| SeTi <sub>2</sub> | P <sub>3</sub> TH         | $P\bar{3}m1(164)$ | $P\bar{6}m2(187)$ | - | 9.00               | 9.00  | 58.8  | 58.1           | -              | -              | 8.99              | 8.98              | 8.98  | 0.0         | 0.0 | 0.0 |
| BrK <sub>2</sub>  | THP                       | $P\bar{3}m1(164)$ | $P\bar{6}m2(187)$ | - | 9.59               | 9.57  | 58.4  | 56.4           | -              | -              | 11.19             | 11.15             | 11.15 | 0.0         | 0.0 | 0.0 |
| BrCa <sub>2</sub> | THP                       | $P\bar{3}m1(164)$ | $P\bar{6}m2(187)$ | - | 7.79               | 7.79  | 59.7  | 60.0           | -              | -              | 8.92              | 8.92              | 8.92  | 0.0         | 0.0 | 0.0 |
| BrRb <sub>2</sub> | THP                       | $P\bar{3}m1(164)$ | $Amm2(38)$        | - | 10.19              | 10.17 | 58.1  | 56.1           | -              | -              | 11.31             | 11.73             | 11.73 | 0.0         | 0.0 | 0.0 |
| BrSr <sub>2</sub> | THX                       | $P\bar{3}m1(164)$ | $P\bar{6}m2(187)$ | - | 8.38               | 8.38  | 59.6  | 59.7           | -              | -              | 13.20             | 13.24             | 13.24 | 0.0         | 0.0 | 0.0 |
| BrCs <sub>2</sub> | THP                       | $P\bar{3}m1(164)$ | $P\bar{6}m2(187)$ | - | 10.65              | 10.61 | 59.4  | 57.1           | -              | -              | 9.87              | 8.39              | 8.39  | 0.0         | 0.0 | 0.0 |
| BrBa <sub>2</sub> | HTX                       | $P\bar{3}m1(164)$ | $P\bar{6}m2(187)$ | - | 8.85               | 8.85  | 59.8  | 59.7           | -              | -              | 16.99             | 16.99             | 16.99 | 0.0         | 0.0 | 0.0 |
| BrTi <sub>2</sub> | PTH                       | $P\bar{3}m1(164)$ | $Amm2(38)$        | - | 7.88               | 7.87  | 58.6  | 54.7           | -              | -              | 7.81              | 7.82              | 7.82  | 0.0         | 0.0 | 0.0 |
| RbK <sub>2</sub>  | TPX                       | $P\bar{3}m1(164)$ | -                 | - | 16.29              | 16.29 | 59.5  | -              | -              | -              | 8.92              | 8.92              | 8.92  | 0.0         | 0.0 | 0.0 |
| SrF <sub>2</sub>  | TPX                       | $P\bar{3}m1(164)$ | -                 | - | 7.82               | 7.83  | 60.1  | -              | -              | -              | 9.61              | 9.61              | 9.61  | 0.0         | 0.0 | 0.0 |
| SrCl <sub>2</sub> | P <sub>3</sub> TX         | $P\bar{3}m1(164)$ | -                 | - | 8.93               | 8.93  | 59.9  | -              | -              | -              | 7.86              | 7.88              | 7.88  | 0.0         | 0.0 | 0.0 |
| SrBr <sub>2</sub> | P <sub>3</sub> TX         | $P\bar{3}m1(164)$ | -                 | - | 9.18               | 9.19  | 59.9  | -              | -              | -              | 8.33              | 8.34              | 8.34  | 0.0         | 0.0 | 0.0 |
| SrI <sub>2</sub>  | P <sub>3</sub> TX         | $P\bar{3}m1(164)$ | -                 | - | 9.74               | 9.74  | 59.1  | -              | -              | -              | 0.872             | 2.041             | 0.0   | -           | -   | -   |
| YF <sub>2</sub>   | HPX                       | -                 | $P\bar{6}m2(187)$ | - | -                  | -     | -     | -              | -              | -              | 6.85              | 6.85              | 6.85  | 0.0         | 4.0 | 3.6 |
| YBr <sub>2</sub>  | HP <sub>3</sub> T         | $P\bar{3}m1(164)$ | $P\bar{6}m2(187)$ | - | 7.91               | 7.90  | 58.4  | 60.0           | -              | -              | 7.77              | 7.77              | 7.77  | 0.0         | 3.9 | 0.9 |
| YI <sub>2</sub>   | HP <sub>3</sub> T         | $P\bar{3}m1(164)$ | $P\bar{6}m2(187)$ | - | 8.39               | 8.39  | 58.9  | 59.6           | -              | -              | 8.25              | 8.25              | 8.25  | 0.0         | 3.7 | 0.8 |
| ZrS <sub>2</sub>  | TXX                       | $P\bar{3}m1(164)$ | -                 | - | 7.38               | 7.38  | 59.9  | -              | -              | -              | -                 | -                 | -     | 0.0         | -   | -   |
| ZrSe <sub>2</sub> | TXX                       | $P\bar{3}m1(164)$ | -                 | - | 7.95               | 7.94  | 59.9  | -              | -              | -              | -                 | -                 | -     | 0.0         | -   | -   |
| ZrTe <sub>2</sub> | TXX                       | $P\bar{3}m1(164)$ | -                 | - | 6.77               | 6.77  | 60.0  | 59.7           | -              | -              | 6.13              | 7.70              | 7.70  | 0.0         | 0.0 | 0.0 |
| NbS <sub>2</sub>  | HP <sub>3</sub> T         | $P\bar{3}m1(164)$ | $P\bar{6}m2(187)$ | - | 6.96               | 6.96  | 59.9  | 60.0           | -              | -              | 6.35              | 6.85              | 6.85  | 0.0         | 0.0 | 0.0 |
| NbSe <sub>2</sub> | HP <sub>3</sub> T         | $P\bar{3}m1(164)$ | $P\bar{6}m2(187)$ | - | 6.96               | 6.96  | 59.9  | 60.0           | -              | -              | 6.35              | 6.85              | 6.85  | 0.0         | 0.0 | 0.0 |
| TcI <sub>2</sub>  | TXX                       | $P\bar{3}m1(164)$ | -                 | - | 8.19               | 8.19  | 57.3  | -              | -              | -              | 2.457             | 3.271             | 4.0   | -           | -   | -   |

(Continued on next page)

(Continued from previous page)

Table 1: List of  $P\bar{3}m1(164)$ 

| species           | Initial structure indices | space group       |   |   | lattice parameters |       |       |                |       |       | relative energy |                |                   | spin moment       |       |       |     |
|-------------------|---------------------------|-------------------|---|---|--------------------|-------|-------|----------------|-------|-------|-----------------|----------------|-------------------|-------------------|-------|-------|-----|
|                   |                           | T                 | H | P | a [Å]              | b [Å] | c [Å] | $\gamma$ [deg] | a [Å] | b [Å] | c [Å]           | $\gamma$ [deg] | $\Delta E_1$ [eV] | $\Delta E_2$ [eV] | T     | H     | P   |
| RuCl <sub>2</sub> | TXX                       | $P\bar{3}m1(164)$ | - | - | 7.24               | 7.24  | 59.9  | -              | -     | -     | -               | 3.699          | 4.041             | 0.0               | 0.0   | -     | -   |
| RuBr <sub>2</sub> | TXX                       | $P\bar{3}m1(164)$ | - | - | 7.63               | 7.63  | 59.9  | -              | -     | -     | -               | 1.206          | 4.004             | 0.0               | 0.0   | -     | -   |
| RhO <sub>2</sub>  | TPX                       | $P\bar{3}m1(164)$ | - | - | 6.17               | 6.16  | 59.9  | -              | -     | -     | -               | 0.026          | 4.539             | 0.0               | 0.0   | -     | 0.0 |
| RhY <sub>2</sub>  | PTX                       | $P\bar{3}m1(164)$ | - | - | 8.22               | 8.23  | 59.9  | -              | -     | -     | -               | 10.37          | 8.57              | 0.0               | 0.0   | -     | 0.0 |
| RhI <sub>2</sub>  | THX                       | $P\bar{3}m1(164)$ | - | - | 8.07               | 8.07  | 60.0  | -              | -     | -     | -               | 8.08           | 8.08              | 59.9              | 33.8  | 3.5   | 3.5 |
| PdO <sub>2</sub>  | HTP                       | $P\bar{3}m1(164)$ | - | - | 6.20               | 6.19  | 59.8  | -              | -     | -     | -               | 6.18           | 6.18              | 60.1              | 0.004 | 0.009 | 0.0 |
| PdF <sub>2</sub>  | PTH                       | $P\bar{3}m1(164)$ | - | - | 6.83               | 6.84  | 59.9  | -              | -     | -     | -               | 6.98           | 6.98              | 72.0              | 0.177 | 0.237 | 8.0 |
| PdS <sub>2</sub>  | TXX                       | $P\bar{3}m1(164)$ | - | - | 7.14               | 7.14  | 60.0  | -              | -     | -     | -               | 8.88           | 8.88              | 2.958             | 0.0   | 0.0   | -   |
| PdCl <sub>2</sub> | HITX                      | $P\bar{3}m1(164)$ | - | - | 7.48               | 7.48  | 59.9  | -              | -     | -     | -               | 8.56           | 8.54              | 47.4              | 0.753 | 3.561 | 8.0 |
| PdK <sub>2</sub>  | HP T                      | $P\bar{3}m1(164)$ | - | - | 10.58              | 10.59 | 57.8  | -              | -     | -     | -               | 10.26          | 10.28             | 59.7              | 0.480 | 0.512 | 0.0 |
| PdCa <sub>2</sub> | P T X                     | $P\bar{3}m1(164)$ | - | - | 8.53               | 8.54  | 59.8  | -              | -     | -     | -               | 8.51           | 8.52              | 60.0              | 0.006 | 1.685 | 0.0 |
| PdSe <sub>2</sub> | HPT                       | $P\bar{3}m1(164)$ | - | - | 7.99               | 7.97  | 59.6  | -              | -     | -     | -               | 7.97           | 7.95              | 60.0              | 0.376 | 0.382 | 0.0 |
| PdSe <sub>2</sub> | TXX                       | $P\bar{3}m1(164)$ | - | - | 7.51               | 7.51  | 59.8  | -              | -     | -     | -               | 6.91           | 6.93              | 60.1              | 0.841 | 4.700 | 0.0 |
| PdBr <sub>2</sub> | PHT                       | $P\bar{3}m1(164)$ | - | - | 7.84               | 7.84  | 59.8  | -              | -     | -     | -               | 8.63           | 8.63              | 49.7              | 0.020 | 0.475 | 7.9 |
| PdRb <sub>2</sub> | P T X                     | $P\bar{3}m1(164)$ | - | - | 10.86              | 10.89 | 58.4  | -              | -     | -     | -               | 10.62          | 10.64             | 60.2              | 0.019 | 1.091 | 0.0 |
| PdSr <sub>2</sub> | TXX                       | $P\bar{3}m1(164)$ | - | - | 9.14               | 9.14  | 59.2  | -              | -     | -     | -               | 6.98           | 8.06              | 90.0              | 2.115 | 4.412 | 0.0 |
| PdTe <sub>2</sub> | TPX                       | $P\bar{3}m1(164)$ | - | - | 8.08               | 8.08  | 59.8  | -              | -     | -     | -               | -              | -                 | 0.025             | 2.028 | 0.0   | 0.0 |
| PdCs <sub>2</sub> | TXX                       | $P\bar{3}m1(164)$ | - | - | 10.85              | 10.91 | 59.8  | -              | -     | -     | -               | -              | -                 | 0.882             | 2.308 | 0.0   | -   |
| PdTi <sub>2</sub> | HTP                       | $P\bar{3}m1(164)$ | - | - | 8.85               | 8.83  | 56.7  | -              | -     | -     | -               | 8.37           | 8.29              | 44.7              | 0.489 | 0.506 | 0.0 |
| PdAl <sub>2</sub> | TPH                       | $P\bar{3}m1(164)$ | - | - | 9.05               | 9.05  | 60.0  | -              | -     | -     | -               | 8.48           | 8.48              | 36.2              | 0.025 | 0.098 | 0.0 |
| AgCa <sub>2</sub> | THX                       | $P\bar{3}m1(164)$ | - | - | 8.98               | 8.97  | 59.5  | -              | -     | -     | -               | 7.78           | 7.80              | 60.9              | 0.101 | 1.069 | 0.0 |
| AgSr <sub>2</sub> | TXX                       | $P\bar{3}m1(164)$ | - | - | 9.53               | 9.53  | 59.8  | -              | -     | -     | -               | -              | -                 | 0.860             | 4.582 | 0.0   | -   |
| AgCs <sub>2</sub> | TPH                       | $P\bar{3}m1(164)$ | - | - | 11.02              | 11.02 | 60.0  | -              | -     | -     | -               | 10.98          | 10.94             | 54.6              | 0.267 | 0.523 | 0.0 |
| AgBa <sub>2</sub> | TPX                       | $P\bar{3}m1(164)$ | - | - | 9.97               | 9.96  | 59.7  | -              | -     | -     | -               | 9.87           | 10.08             | 58.9              | 0.019 | 1.129 | 0.0 |
| CdF <sub>2</sub>  | P T X                     | $P\bar{3}m1(164)$ | - | - | 7.15               | 7.15  | 59.8  | -              | -     | -     | -               | 7.17           | 7.18              | 59.8              | 0.031 | 2.285 | 0.0 |
| CdCl <sub>2</sub> | HTP                       | $P\bar{3}m1(164)$ | - | - | 7.91               | 7.91  | 58.7  | -              | -     | -     | -               | 7.83           | 7.83              | 59.7              | 0.006 | 0.771 | 0.0 |
| CdBr <sub>2</sub> | TXX                       | $P\bar{3}m1(164)$ | - | - | 8.21               | 8.21  | 58.9  | -              | -     | -     | -               | -              | -                 | 0.874             | 1.427 | 0.0   | -   |
| CdBa <sub>2</sub> | HPT                       | $P\bar{3}m1(164)$ | - | - | 10.64              | 10.61 | 56.1  | -              | -     | -     | -               | 9.24           | 9.19              | 58.5              | 0.497 | 0.549 | 0.0 |
| InO <sub>2</sub>  | TPX                       | $P\bar{3}m1(164)$ | - | - | 6.67               | 6.69  | 65.5  | -              | -     | -     | -               | 7.17           | 6.69              | 57.8              | 0.154 | 1.285 | 4.0 |
| InPd <sub>2</sub> | PXX                       | $P\bar{3}m1(164)$ | - | - | -                  | -     | -     | -              | -     | -     | -               | 8.97           | 9.04              | 59.4              | 3.730 | 4.080 | 0.0 |
| SuO <sub>2</sub>  | PXX                       | $P\bar{3}m1(164)$ | - | - | -                  | -     | -     | -              | -     | -     | -               | 6.18           | 6.19              | 60.1              | 2.221 | 2.222 | 0.0 |
| SuS <sub>2</sub>  | TXX                       | $P\bar{3}m1(164)$ | - | - | 7.46               | 7.46  | 60.0  | -              | -     | -     | -               | -              | -                 | 1.498             | 3.010 | 0.0   | -   |
| SuCa <sub>2</sub> | TPH                       | $P\bar{3}m1(164)$ | - | - | 10.12              | 10.12 | 60.0  | -              | -     | -     | -               | 7.62           | 10.79             | 44.8              | 0.018 | 0.590 | 0.0 |
| SuBr <sub>2</sub> | TPX                       | $P\bar{3}m1(164)$ | - | - | 8.77               | 8.77  | 59.9  | -              | -     | -     | -               | 8.88           | 8.41              | 75.8              | 0.806 | 1.045 | 0.0 |
| SuSr <sub>2</sub> | TPX                       | $P\bar{3}m1(164)$ | - | - | 10.51              | 10.53 | 60.0  | -              | -     | -     | -               | 10.49          | 10.54             | 60.1              | 0.070 | 2.162 | 0.0 |
| SuI <sub>2</sub>  | P T X                     | $P\bar{3}m1(164)$ | - | - | 9.18               | 9.18  | 59.7  | -              | -     | -     | -               | 9.14           | 9.12              | 59.8              | 0.004 | 0.937 | 0.0 |
| SuBa <sub>2</sub> | TPX                       | $P\bar{3}m1(164)$ | - | - | 10.86              | 10.91 | 59.6  | -              | -     | -     | -               | 10.95          | 10.84             | 59.7              | 0.029 | 1.678 | 0.0 |
| SbS <sub>2</sub>  | TPX                       | $P\bar{3}m1(164)$ | - | - | 7.58               | 7.58  | 59.7  | -              | -     | -     | -               | 12.71          | 6.94              | 63.5              | 0.467 | 2.805 | 0.0 |
| SbK <sub>2</sub>  | HPX                       | $P\bar{3}m1(164)$ | - | - | -                  | -     | -     | -              | -     | -     | 10.75           | 11.36          | 43.9              | 0.737             | 0.960 | -     | 0.0 |
| SbSe <sub>2</sub> | TXX                       | $P\bar{3}m1(164)$ | - | - | 7.84               | 7.84  | 59.6  | -              | -     | -     | -               | -              | -                 | 0.925             | 2.376 | 0.0   | -   |
| SbTe <sub>2</sub> | TXX                       | $P\bar{3}m1(164)$ | - | - | 8.33               | 8.32  | 58.5  | -              | -     | -     | -               | -              | -                 | 1.259             | 1.772 | 0.0   | -   |
| SbBa <sub>2</sub> | TXX                       | $P\bar{3}m1(164)$ | - | - | 10.03              | 10.07 | 59.9  | -              | -     | -     | -               | 9.11           | 9.13              | 59.5              | 1.313 | 6.828 | 0.0 |
| TeLi <sub>2</sub> | P T X                     | $P\bar{3}m1(164)$ | - | - | 9.17               | 9.17  | 59.3  | -              | -     | -     | -               | 10.21          | 10.21             | 59.4              | 0.038 | 1.715 | 0.0 |
| TeNa <sub>2</sub> | TPX                       | $P\bar{3}m1(164)$ | - | - | 10.19              | 10.20 | 59.5  | -              | -     | -     | -               | 10.21          | 10.21             | 59.4              | 0.005 | 2.006 | 0.0 |
| TeS <sub>2</sub>  | TXX                       | $P\bar{3}m1(164)$ | - | - | 7.71               | 7.71  | 59.8  | -              | -     | -     | -               | 11.19          | 11.20             | 59.7              | 2.292 | 2.634 | 0.0 |
| TeK <sub>2</sub>  | TPX                       | $P\bar{3}m1(164)$ | - | - | 11.31              | 11.33 | 58.6  | -              | -     | -     | -               | -              | -                 | 0.013             | 1.709 | 0.0   | -   |
| TeSe <sub>2</sub> | TXX                       | $P\bar{3}m1(164)$ | - | - | 7.97               | 7.97  | 59.8  | -              | -     | -     | -               | -              | -                 | 0.931             | 2.325 | 0.0   | -   |
| TeRb <sub>2</sub> | TPX                       | $P\bar{3}m1(164)$ | - | - | 11.86              | 11.88 | 58.1  | -              | -     | -     | -               | 11.64          | 11.67             | 59.6              | 0.032 | 1.515 | 0.0 |
| TeSr <sub>2</sub> | THX                       | $P\bar{3}m1(164)$ | - | - | 8.91               | 8.95  | 60.3  | -              | -     | -     | -               | 8.94           | 8.88              | 59.3              | 0.500 | 2.067 | 0.0 |
| TeTe <sub>2</sub> | TXX                       | $P\bar{3}m1(164)$ | - | - | 8.57               | 8.57  | 59.3  | -              | -     | -     | -               | -              | -                 | 1.102             | 1.829 | 0.0   | -   |
| TeCs <sub>2</sub> | TXX                       | $P\bar{3}m1(164)$ | - | - | 12.04              | 12.14 | 59.4  | -              | -     | -     | -               | -              | -                 | 1.228             | 2.144 | 0.0   | -   |
| TeTi <sub>2</sub> | HPT                       | $P\bar{3}m1(164)$ | - | - | 9.79               | 9.80  | 58.4  | -              | -     | -     | -               | 9.76           | 9.77              | 58.2              | 0.032 | 0.034 | 0.0 |
| ISr <sub>2</sub>  | THX                       | $P\bar{3}m1(164)$ | - | - | 8.54               | 8.55  | 59.8  | -              | -     | -     | -               | 8.57           | 8.57              | 59.0              | 0.115 | 1.645 | 0.0 |
| ICs <sub>2</sub>  | THP                       | $P\bar{3}m1(164)$ | - | - | 10.99              | 10.96 | 58.9  | -              | -     | -     | -               | 11.22          | 11.18             | 55.7              | 0.245 | 0.271 | 0.0 |
| CsCs <sub>2</sub> | P T X                     | $P\bar{3}m1(164)$ | - | - | 18.62              | 18.63 | 58.2  | -              | -     | -     | -               | 12.27          | 12.09             | 74.1              | 0.027 | 2.081 | 0.0 |
| BaF <sub>2</sub>  | TPX                       | $P\bar{3}m1(164)$ | - | - | 8.52               | 8.53  | 59.3  | -              | -     | -     | -               | 8.09           | 8.53              | 58.4              | 0.025 | 2.175 | 0.0 |
| BaCl <sub>2</sub> | TPX                       | $P\bar{3}m1(164)$ | - | - | 9.70               | 9.73  | 59.5  | -              | -     | -     | -               | 9.55           | 9.31              | 59.0              | 0.213 | 1.705 | 0.0 |

(Continued on next page)

(Continued from previous page)

Table 1: List of  $P\bar{3}m1(164)$ 

| species           | structure indices | space group |   |                        | lattice parameters |       |       |                |       |       | relative energy |                |                   | spin moment       |     |     |
|-------------------|-------------------|-------------|---|------------------------|--------------------|-------|-------|----------------|-------|-------|-----------------|----------------|-------------------|-------------------|-----|-----|
|                   |                   | T           | H | P                      | a [Å]              | b [Å] | c [Å] | $\gamma$ [deg] | a [Å] | b [Å] | c [Å]           | $\gamma$ [deg] | $\Delta E_1$ [eV] | $\Delta E_2$ [eV] | T   | H   |
| BaBr <sub>2</sub> | P3m1(164)         | -           | - | P3m1(164)              | 10.03              | 10.02 | 59.4  | -              | 9.92  | 9.91  | 59.9            | 0.009          | 1.318             | 0.0               | 0.0 | 0.0 |
| BaI <sub>2</sub>  | P3m1(164)         | -           | - | P3m1(164)              | 10.50              | 10.51 | 59.1  | -              | 10.35 | 10.34 | 59.8            | 0.012          | 0.973             | 0.0               | 0.0 | 0.0 |
| HfS <sub>2</sub>  | P3m1(164)         | -           | - | -                      | 7.30               | 7.29  | 59.8  | -              | -     | -     | -               | 1.150          | 2.406             | 0.0               | -   | -   |
| HfSe <sub>2</sub> | P3m1(164)         | -           | - | P3m1(164)              | 7.49               | 7.48  | 60.0  | -              | 7.49  | 7.48  | 60.0            | 0.001          | 1.854             | 0.0               | 0.0 | 0.0 |
| HfTe <sub>2</sub> | P3m1(164)         | -           | - | P3m1(164)              | 7.91               | 7.91  | 60.0  | -              | 7.90  | 7.90  | 60.0            | 0.005          | 1.351             | 0.0               | 0.0 | 0.0 |
| TaN <sub>2</sub>  | P3m1(164)         | -           | - | -                      | 6.32               | 6.32  | 60.0  | -              | -     | -     | -               | 1.284          | 5.132             | 3.7               | -   | -   |
| TaSe <sub>2</sub> | P3m1(164)         | P6m2(187)   | - | C2/m(12)               | 6.76               | 6.76  | 60.1  | 6.68           | 6.68  | 6.68  | 60.0            | 0.242          | 0.728             | 0.0               | 0.0 | 0.0 |
| TaS <sub>2</sub>  | P3m1(164)         | P6m2(187)   | - | P3m1(164)              | 7.00               | 7.00  | 59.8  | 6.94           | 6.94  | 6.94  | 60.0            | 0.282          | 0.284             | 0.0               | 0.0 | 0.0 |
| OsBr <sub>2</sub> | P3m1(164)         | Cm(8)       | - | -                      | 7.70               | 7.70  | 60.0  | 7.15           | 7.16  | -     | 55.5            | 0.714          | 5.472             | 0.0               | 0.0 | 0.0 |
| OsI <sub>2</sub>  | P3m1(164)         | -           | - | -                      | 8.13               | 8.13  | 60.1  | -              | -     | -     | -               | 2.659          | 5.434             | 0.0               | -   | -   |
| IrO <sub>2</sub>  | P3m1(164)         | -           | - | P3m1(164)              | 6.35               | 6.37  | 55.1  | -              | 6.29  | 6.29  | 60.4            | 0.059          | 2.606             | 0.0               | 0.0 | 0.0 |
| IrSc <sub>2</sub> | P3m1(164)         | -           | - | P3m1(164)              | 7.97               | 7.96  | 59.7  | -              | 7.93  | 7.93  | 60.0            | 0.002          | 1.432             | 0.0               | 0.0 | 0.0 |
| IrSr <sub>2</sub> | P3m1(164)         | P4/mmm(123) | - | -                      | 8.93               | 8.95  | 59.5  | 7.46           | 10.57 | 44.9  | -               | 0.362          | 1.981             | 0.0               | 0.0 | 0.0 |
| IrY <sub>2</sub>  | P3m1(164)         | -           | - | C2/m(12)               | 8.37               | 8.37  | 59.6  | -              | 7.75  | 9.08  | 50.1            | 0.156          | 2.223             | 0.0               | 0.0 | 0.0 |
| IrZr <sub>2</sub> | P3m1(164)         | P4/mmm(123) | - | P3m1(164)              | 8.28               | 8.25  | 60.0  | 8.47           | 5.99  | 45.0  | 59.9            | 0.648          | 0.649             | 0.0               | 0.0 | 0.0 |
| IrIn <sub>2</sub> | P3m1(164)         | Amnm2(38)   | - | P3m1(164)              | 8.28               | 8.27  | 60.2  | 8.14           | 8.15  | 43.4  | 60.5            | 0.330          | 0.337             | 0.0               | 0.0 | 0.0 |
| IrI <sub>2</sub>  | P3m1(164)         | -           | - | -                      | 8.10               | 8.10  | 59.8  | -              | 8.18  | 8.18  | -               | 1.852          | 2.785             | 0.0               | -   | -   |
| IrB <sub>2</sub>  | P3m1(164)         | -           | - | -                      | 9.28               | 9.29  | 59.5  | -              | -     | -     | -               | 0.965          | 2.130             | 0.0               | -   | -   |
| IrTi <sub>2</sub> | P3m1(164)         | Pm(6)       | - | P3m1(164)              | 8.66               | 8.63  | 59.2  | 8.32           | 8.40  | 44.5  | -               | 0.682          | 0.691             | 0.0               | 0.0 | 0.0 |
| PtO <sub>2</sub>  | P3m1(164)         | -           | - | P3m1(164)              | 6.30               | 6.30  | 60.1  | -              | 6.31  | 6.31  | 60.0            | 0.002          | 4.501             | 0.0               | 0.0 | 0.0 |
| PtS <sub>2</sub>  | P3m1(164)         | -           | - | P3m1(164)              | 7.20               | 7.20  | 60.0  | -              | 7.20  | 7.20  | 60.0            | 0.007          | 2.936             | 0.0               | 0.0 | 0.0 |
| PtK <sub>2</sub>  | P3m1(164)         | -           | - | Pmmn(59)               | 10.23              | 10.22 | 59.1  | -              | 9.82  | 10.05 | 59.2            | 0.380          | 1.658             | 0.0               | 0.0 | 0.0 |
| PtSe <sub>2</sub> | P3m1(164)         | P6m2(187)   | - | P3m1(164)              | 8.13               | 8.11  | 59.0  | 7.26           | 7.28  | 60.1  | 59.7            | 0.019          | 0.447             | 0.0               | 0.0 | 0.0 |
| PtGa <sub>2</sub> | P3m1(164)         | Amnm2(38)   | - | -                      | 8.10               | 8.10  | 59.8  | 7.80           | 7.78  | 41.5  | -               | 0.189          | 2.943             | 0.0               | 0.0 | 0.0 |
| PtSb <sub>2</sub> | P3m1(164)         | -           | - | -                      | 7.53               | 7.53  | 60.1  | -              | -     | -     | -               | 3.643          | 5.429             | 0.0               | -   | -   |
| PtRB <sub>2</sub> | P3m1(164)         | -           | - | Pmmn(59)               | 10.62              | 10.61 | 58.8  | -              | 10.24 | 10.23 | 60.6            | 0.306          | 1.460             | 0.0               | 0.0 | 0.0 |
| PtSr <sub>2</sub> | P3m1(164)         | -           | - | -                      | 9.07               | 9.07  | 59.5  | -              | 2.234 | 5.942 | 0.0             | 2.234          | 5.942             | 0.0               | -   | -   |
| PtY <sub>2</sub>  | P3m1(164)         | P6m2(187)   | - | P3m1(164)              | 8.43               | 8.45  | 60.0  | 7.69           | 7.75  | 59.7  | 60.1            | 0.002          | 0.602             | 0.0               | 0.0 | 0.0 |
| PtIn <sub>2</sub> | P3m1(164)         | Amnm2(38)   | - | -                      | 8.56               | 8.53  | 60.2  | 8.10           | 8.10  | 42.5  | -               | 0.408          | 3.977             | 0.0               | 0.0 | 0.0 |
| PtTe <sub>2</sub> | P3m1(164)         | -           | - | P3m1(164)              | 8.06               | 8.06  | 60.0  | -              | 8.07  | 8.07  | 59.9            | 0.033          | 3.900             | 0.0               | 0.0 | 0.0 |
| PtCs <sub>2</sub> | P3m1(164)         | -           | - | -                      | 10.67              | 10.67 | 60.0  | 10.67          | 10.67 | 60.0  | -               | 0.038          | 0.939             | 0.0               | 0.0 | 0.0 |
| PtHg <sub>2</sub> | P3m1(164)         | Amnm2(38)   | - | -                      | 8.73               | 8.72  | 59.8  | 8.89           | 8.87  | 38.3  | -               | 0.655          | 1.251             | 0.0               | 0.0 | 0.0 |
| PtTi <sub>2</sub> | P3m1(164)         | Amnm2(38)   | - | P2 <sub>1</sub> /m(11) | 8.73               | 8.72  | 58.9  | 8.37           | 8.39  | 43.6  | 58.9            | 0.035          | 0.093             | 0.0               | 0.0 | 0.0 |
| PtBi <sub>2</sub> | P3m1(164)         | Amnm2(38)   | - | P3m1(164)              | 8.76               | 8.68  | 58.8  | 7.10           | 8.60  | 52.6  | -               | 0.545          | 0.554             | 0.0               | 0.0 | 0.0 |
| AuAl <sub>2</sub> | P3m1(164)         | -           | - | P3m1(164)              | 8.87               | 8.88  | 59.9  | -              | 8.88  | 8.88  | 60.0            | 0.008          | 0.908             | 0.0               | 0.0 | 0.0 |
| AuK <sub>2</sub>  | P3m1(164)         | Amnm2(38)   | - | P1(2)                  | 9.75               | 9.76  | 59.6  | 10.01          | 10.08 | 50.6  | 51.1            | 0.142          | 0.621             | 0.0               | 0.0 | 0.0 |
| AuCa <sub>2</sub> | P3m1(164)         | -           | - | P3m1(164)              | 8.88               | 8.88  | 59.2  | -              | 8.79  | 8.78  | 59.9            | 0.007          | 0.922             | 0.0               | 0.0 | 0.0 |
| AuSe <sub>2</sub> | P3m1(164)         | P6m2(187)   | - | P3m1(164)              | 8.70               | 8.65  | 55.4  | 6.98           | 6.98  | 60.0  | 56.4            | 0.216          | 0.241             | 0.0               | 0.0 | 0.0 |
| AuS <sub>2</sub>  | P3m1(164)         | Pmm2(25)    | - | C2/m(12)               | 7.62               | 7.61  | 60.0  | 7.83           | 11.25 | 44.2  | 66.3            | 0.426          | 0.545             | 0.0               | 0.0 | 0.0 |
| AuRb <sub>2</sub> | P3m1(164)         | Amnm2(38)   | - | P2 <sub>1</sub> /m(11) | 10.14              | 10.17 | 60.1  | 10.04          | 10.00 | 55.1  | 40.8            | 0.437          | 0.491             | 0.0               | 0.0 | 0.0 |
| AuSr <sub>2</sub> | P3m1(164)         | -           | - | -                      | 9.34               | 9.35  | 59.4  | -              | -     | -     | -               | 1.124          | 1.688             | 0.0               | -   | -   |
| AuIn <sub>2</sub> | P3m1(164)         | Pmm2(25)    | - | -                      | 7.33               | 7.31  | 61.8  | 7.13           | 7.03  | 51.4  | -               | 0.403          | 1.982             | 0.0               | 0.0 | 0.0 |
| AuSb <sub>2</sub> | P3m1(164)         | Pc(7)       | - | -                      | 8.60               | 8.57  | 59.3  | 9.04           | 9.05  | 44.3  | -               | 0.171          | 1.440             | 0.0               | 0.0 | 0.0 |
| AuTe <sub>2</sub> | P3m1(164)         | -           | - | P2 <sub>1</sub> /m(11) | 8.11               | 8.10  | 59.9  | -              | 10.47 | 10.47 | 61.3            | 0.024          | 0.917             | 0.0               | 0.0 | 0.0 |
| AuCs <sub>2</sub> | P3m1(164)         | Amnm2(38)   | - | P1(2)                  | 10.73              | 10.72 | 59.6  | 10.62          | 10.69 | 55.1  | 37.9            | 0.621          | 0.654             | 0.0               | 0.0 | 0.0 |
| AuHg <sub>2</sub> | P3m1(164)         | Amnm2(38)   | - | -                      | 9.44               | 9.43  | 58.5  | 9.11           | 9.09  | 36.8  | -               | 0.323          | 0.914             | 0.0               | 0.0 | 0.0 |
| AuBi <sub>2</sub> | P3m1(164)         | Amnm2(38)   | - | P1(1)                  | 8.89               | 8.88  | 57.7  | 9.23           | 9.23  | 45.5  | 46.1            | 0.112          | 0.325             | 0.0               | 0.0 | 0.0 |
| HgF <sub>2</sub>  | P3m1(164)         | -           | - | P3m1(164)              | 7.45               | 7.46  | 59.4  | -              | 7.45  | 7.45  | 59.6            | 0.001          | 1.882             | 0.0               | 0.0 | 0.0 |
| HgCl <sub>2</sub> | P3m1(164)         | C2/m(12)    | - | -                      | 8.21               | 8.22  | 57.2  | 9.88           | 8.34  | 53.0  | -               | 0.350          | 1.827             | 0.0               | 0.0 | 0.0 |
| HgCa <sub>2</sub> | P3m1(164)         | P6m2(187)   | - | P2 <sub>1</sub> /m(11) | 7.78               | 7.78  | 60.0  | 8.01           | 7.99  | 59.8  | 59.8            | 0.167          | 0.272             | 0.0               | 0.0 | 0.0 |
| HgSr <sub>2</sub> | P3m1(164)         | P6m2(187)   | - | P1(2)                  | 9.00               | 8.90  | 59.5  | 8.75           | 8.70  | 59.2  | 56.6            | 0.022          | 0.108             | 0.0               | 0.0 | 0.0 |
| HgCs <sub>2</sub> | P3m1(164)         | -           | - | -                      | 11.55              | 11.43 | 57.4  | -              | -     | -     | -               | 1.902          | 3.325             | 0.0               | -   | -   |
| TlI <sub>2</sub>  | P3m1(164)         | -           | - | P1(2)                  | 9.18               | 9.17  | 57.7  | -              | 10.73 | 11.54 | 71.8            | 0.527          | 1.204             | 0.0               | 0.0 | 0.0 |
| PbO <sub>2</sub>  | P3m1(164)         | -           | - | P3m1(164)              | 6.88               | 6.88  | 60.0  | -              | 6.88  | 6.88  | 59.9            | 0.006          | 4.286             | 0.0               | 0.0 | 0.0 |
| PbF <sub>2</sub>  | P3m1(164)         | -           | - | P3m1(164)              | 8.05               | 8.06  | 59.8  | -              | 8.06  | 8.07  | 59.6            | 0.013          | 1.893             | 0.0               | 0.0 | 0.0 |
| PbCl <sub>2</sub> | P3m1(164)         | -           | - | Pmmn(59)               | 8.81               | 8.81  | 59.9  | -              | 8.99  | 8.70  | 58.2            | 0.336          | 1.116             | 0.0               | 0.0 | 0.0 |
| PbCa <sub>2</sub> | P3m1(164)         | -           | - | P3m1(164)              | 10.26              | 10.26 | 59.7  | -              | 10.22 | 10.21 | 60.0            | 0.006          | 2.093             | 0.0               | 0.0 | 0.0 |

(Continued on next page)

Table 1: List of  $P\bar{3}m1(164)$ 

| species           | Initial structure indices |                   | space group       |                   |       | lattice parameters |       |                |       |       |                | relative energy   |                   | spin moment           |     |     |
|-------------------|---------------------------|-------------------|-------------------|-------------------|-------|--------------------|-------|----------------|-------|-------|----------------|-------------------|-------------------|-----------------------|-----|-----|
|                   | PTX                       | T                 | H                 | P                 | T     | H                  |       |                | P     |       |                | $\Delta E_1$ [eV] | $\Delta E_2$ [eV] | [ $\mu_B$ /unit cell] |     |     |
|                   |                           |                   |                   |                   |       | a [Å]              | b [Å] | $\gamma$ [deg] | a [Å] | b [Å] | $\gamma$ [deg] |                   |                   | T                     | H   | P   |
| PbBr <sub>2</sub> | PTX                       | $P\bar{3}m1(164)$ | -                 | $P\bar{3}m1(164)$ | 8.94  | 8.94               | 60.2  | -              | 8.94  | 8.94  | 59.9           | 0.004             | 0.939             | 0.0                   | -   | 0.0 |
| PbSr <sub>2</sub> | PTX                       | $P\bar{3}m1(164)$ | -                 | $P\bar{3}m1(164)$ | 10.69 | 10.68              | 59.7  | -              | 10.64 | 10.63 | 59.9           | 0.004             | 1.946             | 0.0                   | -   | 0.0 |
| PbI <sub>2</sub>  | PTX                       | $P\bar{3}m1(164)$ | -                 | $P\bar{3}m1(164)$ | 9.33  | 9.33               | 59.4  | -              | 9.26  | 9.26  | 60.0           | 0.002             | 0.862             | 0.0                   | -   | 0.0 |
| PbBa <sub>2</sub> | PTX                       | $P\bar{3}m1(164)$ | -                 | $P\bar{3}m1(164)$ | 11.06 | 11.04              | 59.4  | -              | 10.96 | 10.94 | 59.7           | 0.007             | 1.629             | 0.0                   | -   | 0.0 |
| BiAl <sub>2</sub> | PHT                       | $P\bar{3}m1(164)$ | $P\bar{6}m2(187)$ | $P6/mmm(191)$     | 8.84  | 8.84               | 59.7  | 8.63           | 8.60  | 58.5  | 10.25          | 0.564             | 0.719             | 0.0                   | 0.0 | 0.0 |
| BiS <sub>2</sub>  | PTX                       | $P\bar{3}m1(164)$ | -                 | $P2_1/m(11)$      | 7.87  | 7.86               | 59.6  | -              | 9.95  | 8.55  | 63.7           | 0.397             | 2.636             | 0.0                   | -   | 0.0 |
| BiTe <sub>2</sub> | THX                       | $P\bar{3}m1(164)$ | $P1(1)$           | -                 | 8.59  | 8.59               | 56.1  | 9.56           | 10.21 | 51.3  | -              | 0.370             | 0.993             | 0.0                   | 0.0 | -   |
| BiBa <sub>2</sub> | TPX                       | $P\bar{3}m1(164)$ | -                 | $P2_1/m(11)$      | 10.20 | 10.20              | 59.7  | -              | 10.36 | 10.18 | 60.7           | 0.022             | 1.152             | 0.0                   | -   | 0.0 |



Table 2: List of  $P2_1/m(11)$ 

| species           | Initial structure indices |   | space group |   |                   | lattice parameters |       |       |                |       |       | relative energy |                | spin moment       |                   |      |       |       |      |     |
|-------------------|---------------------------|---|-------------|---|-------------------|--------------------|-------|-------|----------------|-------|-------|-----------------|----------------|-------------------|-------------------|------|-------|-------|------|-----|
|                   | T                         | H | T           | H | P                 | a [Å]              | b [Å] | c [Å] | $\gamma$ [deg] | a [Å] | b [Å] | c [Å]           | $\gamma$ [deg] | $\Delta E_1$ [eV] | $\Delta E_2$ [eV] | T    | H     | P     |      |     |
| BeZr <sub>2</sub> | PXX                       | - | -           | - | $P2_1/m(11)$      | -                  | -     | -     | -              | 6.05  | 8.11  | -               | 41.6           | 1.302             | 2.180             | -    | -     | -     | 0.0  |     |
| BeTa <sub>2</sub> | HXX                       | - | -           | - | $P2_1/m(11)$      | 6.43               | 6.42  | 60.0  | -              | 6.35  | 5.61  | -               | 55.3           | 7.349             | 8.785             | -    | 0.0   | -     | -    |     |
| BSi <sub>2</sub>  | P3m1(164)                 | - | -           | - | $P2_1/m(11)$      | 6.43               | 6.42  | 60.0  | -              | 7.80  | 7.16  | -               | 89.9           | 0.443             | 1.111             | 0.0  | 0.0   | -     | -    |     |
| BCr <sub>2</sub>  | HPX                       | - | -           | - | $P2_1/m(11)$      | 6.30               | 6.31  | 60.1  | -              | 5.02  | 6.08  | -               | 49.1           | 0.558             | 2.198             | -    | 0.0   | -     | 0.0  |     |
| BMn <sub>2</sub>  | TXX                       | - | -           | - | $P\bar{6}m2(187)$ | 5.51               | 5.51  | 60.0  | -              | 5.47  | 5.47  | -               | 60.0           | 1.940             | 5.815             | 27.5 | 0.0   | -     | -    |     |
| BRh <sub>2</sub>  | $P2_1/m(11)$              | - | -           | - | $Pmm2(25)$        | 5.50               | 5.41  | 59.4  | -              | 5.48  | 5.42  | -               | 59.6           | 0.015             | 0.267             | 0.0  | 0.0   | -     | 0.0  |     |
| BOs <sub>2</sub>  | $P2_1/m(11)$              | - | -           | - | $Pmm2(25)$        | 7.22               | 6.86  | 58.1  | -              | 6.80  | 6.80  | -               | 52.1           | 0.517             | 11.452            | 0.0  | 0.0   | -     | -    |     |
| CCd <sub>2</sub>  | $P2_1/m(11)$              | - | -           | - | $Pmn2_1(31)$      | 6.97               | 6.97  | 59.6  | -              | 6.82  | 7.08  | -               | 61.1           | 0.027             | 2.386             | 0.0  | 0.0   | -     | -    |     |
| NPb <sub>2</sub>  | HPT                       | - | -           | - | $Cm(8)$           | 5.17               | 4.95  | 58.5  | -              | 6.13  | 6.13  | -               | 60.0           | 1.114             | 3.420             | 0.0  | 0.0   | -     | -    |     |
| OBs <sub>2</sub>  | TXX                       | - | -           | - | $P\bar{6}m2(187)$ | 6.46               | 6.45  | 57.9  | -              | 6.13  | 6.13  | -               | 60.0           | 0.613             | 1.683             | 0.0  | 0.0   | -     | -    |     |
| OZr <sub>2</sub>  | THX                       | - | -           | - | $P\bar{6}m2(187)$ | 6.79               | 6.55  | 50.1  | -              | -     | -     | -               | -              | 1.871             | 7.775             | 0.0  | -     | -     | -    |     |
| OMo <sub>2</sub>  | TXX                       | - | -           | - | -                 | -                  | -     | -     | -              | -     | -     | -               | -              | 2.125             | 2.135             | -    | -     | -     | 0.0  |     |
| OBa <sub>2</sub>  | PXX                       | - | -           | - | $P2_1/m(11)$      | -                  | -     | -     | -              | 9.20  | 9.19  | -               | 59.2           | 1.255             | 2.135             | -    | -     | -     | 0.0  |     |
| OPt <sub>2</sub>  | PXX                       | - | -           | - | $P2_1/m(11)$      | -                  | -     | -     | -              | 7.29  | 7.30  | -               | 98.4           | 1.894             | 1.908             | -    | -     | -     | 0.0  |     |
| OAu <sub>2</sub>  | THP                       | - | -           | - | $P2_1/m(11)$      | 6.46               | 6.46  | 54.4  | -              | 6.45  | 6.46  | -               | 54.6           | 0.035             | 0.733             | 0.0  | 0.0   | -     | 0.0  |     |
| AlSb <sub>2</sub> | HPT                       | - | -           | - | $Pmn2_1(31)$      | 10.18              | 8.75  | 44.0  | -              | 8.25  | 8.26  | -               | 59.2           | 0.176             | 0.251             | 0.0  | 0.0   | -     | 0.0  |     |
| AlHg <sub>2</sub> | THP                       | - | -           | - | $P\bar{6}m2(187)$ | 8.03               | 8.04  | 44.1  | -              | 7.97  | 7.84  | -               | 44.3           | 0.042             | 0.795             | 0.0  | 0.0   | -     | 0.0  |     |
| SiPd <sub>2</sub> | HPT                       | - | -           | - | $Pc(7)$           | 7.11               | 7.08  | 48.2  | -              | 6.11  | 6.11  | -               | 59.7           | 0.083             | 0.668             | 0.0  | 0.0   | -     | 0.0  |     |
| SiCs <sub>2</sub> | PXX                       | - | -           | - | $P\bar{6}m2(187)$ | 11.81              | 11.79 | 58.3  | -              | 7.03  | 7.40  | -               | 58.4           | 0.013             | 1.126             | 8.0  | 0.0   | -     | 8.0  |     |
| PSi <sub>2</sub>  | PXX                       | - | -           | - | -                 | -                  | -     | -     | -              | -     | -     | -               | -              | 1.687             | 4.190             | -    | -     | -     | 0.0  |     |
| PSc <sub>2</sub>  | PXX                       | - | -           | - | $P2_1/m(11)$      | 7.57               | 7.30  | 61.2  | -              | 7.55  | 7.30  | -               | 61.2           | 0.000             | 2.459             | 0.0  | -     | -     | 0.0  |     |
| PTi <sub>2</sub>  | PXX                       | - | -           | - | $P2_1/m(11)$      | 6.91               | 6.13  | 63.4  | -              | -     | -     | -               | -              | 0.856             | 3.023             | -    | -     | -     | 0.0  |     |
| PV <sub>2</sub>   | TXX                       | - | -           | - | -                 | -                  | -     | -     | -              | 6.76  | 7.40  | -               | 56.7           | 3.931             | 5.400             | 0.0  | -     | -     | 27.4 |     |
| PCr <sub>2</sub>  | TPX                       | - | -           | - | $Pmmn(59)$        | 7.17               | 7.04  | 60.5  | -              | -     | -     | -               | -              | 0.187             | 2.486             | 27.8 | -     | -     | -    |     |
| PMn <sub>2</sub>  | TXX                       | - | -           | - | -                 | 6.78               | 6.77  | 57.9  | -              | -     | -     | -               | -              | 2.465             | 6.119             | 23.4 | -     | -     | -    |     |
| PCo <sub>2</sub>  | TXX                       | - | -           | - | -                 | 6.46               | 6.46  | 47.9  | -              | -     | -     | -               | -              | 2.829             | 4.078             | 7.8  | -     | -     | -    |     |
| PNi <sub>2</sub>  | PXX                       | - | -           | - | $P2_1/m(11)$      | 6.63               | 6.63  | 58.5  | -              | -     | -     | -               | -              | 0.214             | 2.323             | 0.0  | 0.0   | -     | 0.0  |     |
| PGe <sub>2</sub>  | PHT                       | - | -           | - | $P\bar{6}m2(187)$ | 6.75               | 6.75  | 59.4  | -              | 7.03  | 7.40  | -               | 58.4           | 0.002             | 0.320             | 0.0  | 0.0   | -     | 0.0  |     |
| PSr <sub>2</sub>  | PXX                       | - | -           | - | $Cm(8)$           | 8.94               | 8.94  | 59.4  | -              | -     | -     | -               | -              | 0.005             | 1.668             | 0.0  | -     | -     | 0.0  |     |
| PNb <sub>2</sub>  | TXX                       | - | -           | - | $P2_1/m(11)$      | 6.68               | 7.58  | 63.8  | -              | -     | -     | -               | -              | 2.057             | 4.823             | 0.0  | -     | -     | -    |     |
| PMo <sub>2</sub>  | TXX                       | - | -           | - | -                 | 7.24               | 7.24  | 49.2  | -              | -     | -     | -               | -              | 3.085             | 3.334             | 0.0  | -     | -     | -    |     |
| PTc <sub>2</sub>  | TXX                       | - | -           | - | -                 | 7.10               | 5.63  | 66.6  | -              | -     | -     | -               | -              | 3.599             | 7.906             | 0.0  | -     | -     | -    |     |
| PRu <sub>2</sub>  | TXX                       | - | -           | - | -                 | 7.02               | 7.02  | 47.1  | -              | -     | -     | -               | -              | 1.103             | 4.425             | 0.0  | -     | -     | -    |     |
| PRh <sub>2</sub>  | PXX                       | - | -           | - | $Pmmn(59)$        | 7.21               | 6.95  | 58.7  | -              | 9.06  | 7.11  | -               | 38.3           | 0.760             | 1.307             | 0.0  | -     | -     | 0.0  |     |
| PPd <sub>2</sub>  | PXX                       | - | -           | - | $P\bar{1}(2)$     | 7.19               | 7.19  | 60.5  | -              | 7.29  | 7.27  | -               | 56.1           | 0.089             | 1.098             | 0.0  | -     | -     | 0.0  |     |
| PHf <sub>2</sub>  | PXX                       | - | -           | - | $P2_1/m(11)$      | 7.69               | 7.70  | 52.4  | -              | 7.83  | 6.91  | -               | 63.8           | 0.077             | 1.660             | 0.0  | -     | -     | 0.0  |     |
| PPt <sub>2</sub>  | HPT                       | - | -           | - | $Pc(7)$           | 6.86               | 6.86  | 49.2  | -              | 6.44  | 6.44  | -               | 53.1           | 0.060             | 0.541             | 0.0  | 0.0   | -     | 0.0  |     |
| SBe <sub>2</sub>  | PXX                       | - | -           | - | $P2_1/m(11)$      | -                  | -     | -     | -              | -     | -     | -               | -              | 2.333             | 4.987             | -    | -     | -     | 0.0  |     |
| STi <sub>2</sub>  | PXX                       | - | -           | - | $P2_1/m(11)$      | 6.56               | 7.28  | 63.1  | -              | -     | -     | -               | -              | 0.289             | 0.527             | 0.0  | 0.0   | -     | 0.0  |     |
| SV <sub>2</sub>   | PXX                       | - | -           | - | $P2_1/m(11)$      | 6.89               | 6.89  | 53.0  | -              | -     | -     | -               | -              | 0.008             | 5.997             | 0.0  | -     | -     | 0.0  |     |
| SZr <sub>2</sub>  | PXX                       | - | -           | - | $P2_1/m(11)$      | 7.45               | 7.44  | 59.7  | -              | 7.97  | 7.04  | -               | 63.8           | 1.250             | 2.169             | -    | -     | -     | 0.0  |     |
| SPb <sub>2</sub>  | PHT                       | - | -           | - | $Pmmn(59)$        | -                  | -     | -     | -              | 7.54  | 6.88  | -               | 56.4           | 10.21             | 10.26             | 43.9 | 0.289 | 0.527 | 0.0  | 0.0 |
| SBi <sub>2</sub>  | PXX                       | - | -           | - | $P2_1/m(11)$      | -                  | -     | -     | -              | 9.73  | 10.66 | -               | 56.2           | 1.536             | 1.745             | -    | -     | -     | 0.0  |     |
| ClK <sub>2</sub>  | TPH                       | - | -           | - | $P2_1/m(11)$      | 9.24               | 9.26  | 57.9  | -              | 9.08  | 9.10  | -               | 57.3           | 0.130             | 0.236             | 0.0  | 0.0   | -     | 0.0  |     |
| TiCl <sub>2</sub> | HPX                       | - | -           | - | $P\bar{6}m2(187)$ | -                  | -     | -     | -              | 6.55  | 6.55  | -               | 59.9           | 0.179             | 1.369             | -    | -     | -     | 0.0  |     |
| TiBr <sub>2</sub> | HPT                       | - | -           | - | $P\bar{6}m2(187)$ | 7.36               | 7.64  | 58.7  | -              | 6.94  | 6.93  | -               | 60.0           | 0.670             | 0.720             | 7.8  | 0.0   | -     | 0.0  |     |
| VO <sub>2</sub>   | TPX                       | - | -           | - | $P2_1/m(11)$      | 5.77               | 5.77  | 60.6  | -              | 7.19  | 7.26  | -               | 43.1           | 0.555             | 1.228             | 4.0  | 0.0   | -     | 4.0  |     |
| VY <sub>2</sub>   | PTH                       | - | -           | - | $Pmmmm(47)$       | 9.96               | 7.04  | 44.8  | -              | 6.99  | 9.84  | -               | 44.7           | 0.366             | 0.558             | 9.8  | 6.2   | -     | 0.0  |     |
| VTe <sub>2</sub>  | PTH                       | - | -           | - | $P\bar{6}m2(187)$ | 7.42               | 7.45  | 57.1  | -              | 7.26  | 7.25  | -               | 59.9           | 0.062             | 0.215             | 5.3  | 4.0   | -     | 5.5  |     |
| CrK <sub>2</sub>  | HXX                       | - | -           | - | $P2_1/m(11)$      | -                  | -     | -     | -              | 8.68  | 10.18 | -               | 53.9           | 1.711             | 3.942             | -    | -     | -     | 20.3 |     |
| CrCa <sub>2</sub> | THX                       | - | -           | - | $P4/mmm(123)$     | 7.62               | 8.88  | 54.4  | -              | 7.42  | 10.52 | -               | 44.9           | 0.640             | 8.018             | 16.0 | 17.7  | -     | -    |     |
| CrSe <sub>2</sub> | TPH                       | - | -           | - | $P\bar{6}m2(187)$ | 6.86               | 6.81  | 59.5  | -              | 6.76  | 6.75  | -               | 59.8           | 0.016             | 0.811             | 8.6  | 8.0   | -     | 8.6  |     |
| CrBa <sub>2</sub> | PXX                       | - | -           | - | $P2_1/m(11)$      | -                  | -     | -     | -              | 8.70  | 9.16  | -               | 58.2           | 1.423             | 2.977             | -    | -     | -     | 0.0  |     |
| MnCa <sub>2</sub> | TPH                       | - | -           | - | $P\bar{1}(2)$     | 7.55               | 8.78  | 54.5  | -              | 7.37  | 10.46 | -               | 44.7           | 0.441             | 0.589             | 14.7 | 17.2  | -     | 14.8 |     |
| MnSc <sub>2</sub> | PHT                       | - | -           | - | $P2_1/m(11)$      | 6.56               | 8.25  | 53.2  | -              | 6.30  | 8.92  | -               | 44.9           | 0.107             | 0.154             | 5.8  | 0.0   | -     | 5.1  |     |
| CoSe <sub>2</sub> | TPX                       | - | -           | - | $P2_1/m(11)$      | 7.00               | 7.04  | 53.3  | -              | 6.68  | 6.82  | -               | 52.7           | 0.153             | 1.557             | 0.0  | -     | -     | 0.0  |     |
| CoZr <sub>2</sub> | PXX                       | - | -           | - | $P2_1/m(11)$      | -                  | -     | -     | -              | 7.79  | 6.52  | -               | 52.6           | 2.502             | 2.631             | -    | -     | -     | 0.0  |     |

(Continued on next page)

(Continued from previous page)

Table 2: List of  $P_{21}/m(11)$ 

| species           | Initial structure indices | space group    |                   |                | lattice parameters |       |       |                |       |       | relative energy |                |                   | spin moment       |      |      |     |
|-------------------|---------------------------|----------------|-------------------|----------------|--------------------|-------|-------|----------------|-------|-------|-----------------|----------------|-------------------|-------------------|------|------|-----|
|                   |                           | T              | H                 | P              | a [Å]              | b [Å] | c [Å] | $\gamma$ [deg] | a [Å] | b [Å] | c [Å]           | $\gamma$ [deg] | $\Delta E_1$ [eV] | $\Delta E_2$ [eV] | T    | H    | P   |
| NiSn <sub>2</sub> | HTP                       | $P_{21}/m(11)$ | $Pmmm(47)$        | $P1(2)$        | 8.32               | 6.49  | 7.04  | 49.5           | 6.70  | 8.17  | 8.17            | 52.9           | 0.383             | 0.556             | 0.0  | 0.0  | 0.0 |
| GaCa <sub>2</sub> | PTH                       | $P4/mmm(123)$  | $P4/mmm(123)$     | $P_{21}/m(11)$ | 7.31               | 10.40 | 10.38 | 7.30           | 7.60  | 8.94  | 8.94            | 53.3           | 0.226             | 0.265             | 0.0  | 0.0  | 0.0 |
| GeCr <sub>2</sub> | THX                       | $P_{21}/m(11)$ | $P4/mmm(123)$     | $P_{21}/m(11)$ | 7.43               | 7.87  | 8.44  | 44.8           | 5.95  | 8.44  | 8.44            | 44.8           | 0.593             | 2.554             | 31.9 | 32.5 | —   |
| GePd <sub>2</sub> | PTH                       | $P_{21}/m(11)$ | $P6m2(187)$       | $P_{21}/m(11)$ | 7.57               | 7.59  | 6.11  | 59.9           | 6.11  | 6.11  | 6.11            | 59.9           | 0.230             | 0.630             | 0.0  | 0.0  | 0.0 |
| GeAu <sub>2</sub> | THX                       | $P_{21}/m(11)$ | $Pmn2_1(31)$      | $P_{21}/m(11)$ | 7.84               | 7.85  | 7.78  | 42.5           | 7.78  | 7.78  | 7.78            | 42.5           | 0.120             | 1.981             | 0.0  | 0.0  | 0.0 |
| AsSc <sub>2</sub> | TPX                       | $P_{21}/m(11)$ | —                 | $P_{21}/m(11)$ | 7.89               | 7.47  | 6.13  | 61.3           | 7.97  | 7.52  | 7.52            | 61.6           | 0.008             | 2.161             | 0.0  | 0.0  | 0.0 |
| AsV <sub>2</sub>  | TXX                       | $P_{21}/m(11)$ | —                 | $P_{21}/m(11)$ | 6.21               | 6.96  | 62.8  | —              | —     | —     | —               | —              | 7.718             | 8.634             | 0.0  | —    | —   |
| AsSr <sub>2</sub> | PTH                       | $P_{21}/m(11)$ | —                 | $P_{21}/m(11)$ | 9.11               | 9.12  | 60.0  | —              | 9.13  | 9.21  | 9.21            | 59.6           | 0.033             | 1.587             | 0.0  | —    | 1.8 |
| AsZr <sub>2</sub> | TPX                       | $P_{21}/m(11)$ | —                 | $P_{21}/m(11)$ | 8.17               | 8.22  | 51.8  | —              | 7.26  | 8.15  | 8.15            | 63.3           | 0.078             | 2.960             | 0.0  | —    | 0.0 |
| AsBa <sub>2</sub> | TPX                       | $P_{21}/m(11)$ | —                 | $P_{21}/m(11)$ | 9.46               | 9.52  | 60.2  | —              | 9.67  | 9.56  | 9.56            | 59.2           | 0.018             | 1.636             | 0.0  | —    | 0.1 |
| AsHf <sub>2</sub> | PTH                       | $P_{21}/m(11)$ | —                 | $P_{21}/m(11)$ | 6.99               | 8.10  | 64.3  | —              | 8.14  | 8.16  | 8.16            | 50.3           | 0.155             | 2.724             | 0.0  | —    | 0.0 |
| SeLi <sub>2</sub> | TPX                       | $P_{21}/m(11)$ | —                 | $P_{21}/m(11)$ | 8.32               | 8.31  | 59.8  | —              | 8.33  | 8.31  | 8.31            | 59.8           | 0.043             | 2.199             | 0.0  | —    | 0.0 |
| SeSe <sub>2</sub> | TPH                       | $P_{21}/m(11)$ | $P\bar{6}m2(187)$ | $P_{21}/m(11)$ | 8.11               | 8.12  | 52.2  | 60.0           | 6.98  | 6.97  | 6.97            | 60.0           | 0.003             | 0.776             | 0.0  | —    | 0.0 |
| SeY <sub>2</sub>  | HTP                       | $P_{21}/m(11)$ | $P\bar{6}m2(187)$ | $P_{21}/m(11)$ | 7.66               | 7.65  | 60.0  | 59.9           | 7.39  | 7.38  | 7.38            | 59.9           | 0.058             | 0.150             | 0.0  | —    | 0.0 |
| SeZr <sub>2</sub> | PTH                       | $P_{21}/m(11)$ | —                 | $P_{21}/m(11)$ | 8.16               | 8.15  | 52.1  | —              | 7.17  | 8.16  | 8.16            | 63.9           | 0.023             | 3.252             | 0.0  | —    | 0.0 |
| SeSn <sub>2</sub> | PTH                       | $P_{21}/m(11)$ | —                 | $P1(1)$        | 7.46               | 7.46  | 59.0  | —              | 8.39  | 9.21  | 9.21            | 80.6           | 0.327             | 0.868             | 0.0  | —    | 0.0 |
| SePb <sub>2</sub> | PHT                       | $P_{21}/m(11)$ | $Pmnm(59)$        | $P_{21}/m(11)$ | 7.94               | 7.94  | 57.5  | 55.9           | 7.02  | 7.77  | 7.77            | 55.9           | 0.379             | 0.517             | 0.0  | —    | 0.0 |
| BrLi <sub>2</sub> | TPH                       | $C2/m(12)$     | $Pc(7)$           | $P_{21}/m(11)$ | 7.43               | 7.77  | 57.0  | 72.0           | 6.71  | 6.66  | 6.66            | 89.9           | 0.103             | 0.215             | 0.0  | —    | 0.0 |
| BrK <sub>2</sub>  | THP                       | $P_{21}/m(11)$ | $P\bar{6}m2(187)$ | $P_{21}/m(11)$ | 9.59               | 9.57  | 58.4  | 56.4           | 9.58  | 9.55  | 9.55            | 90.5           | 0.245             | 0.281             | 0.0  | —    | 0.0 |
| BrRb <sub>2</sub> | THP                       | $P_{21}/m(11)$ | $Amm2(38)$        | $P_{21}/m(11)$ | 10.19              | 10.17 | 58.1  | 56.1           | 10.14 | 10.12 | 10.12           | 56.1           | 0.241             | 0.304             | 0.0  | —    | 0.0 |
| BrSn <sub>2</sub> | PTH                       | $P_{21}/m(11)$ | —                 | $Pm(6)$        | 6.19               | 6.18  | 71.5  | —              | 9.74  | 7.25  | 7.25            | 67.7           | 0.121             | 1.408             | 0.0  | —    | 0.0 |
| BrHf <sub>2</sub> | THP                       | $P_{21}/m(11)$ | —                 | $Pm(6)$        | 6.60               | 6.70  | 59.5  | 60.3           | 6.59  | 6.58  | 6.58            | 49.6           | 0.551             | 0.623             | 0.0  | —    | 0.0 |
| RbCa <sub>2</sub> | HXX                       | —              | —                 | —              | —                  | —     | —     | 16.3           | 14.39 | 15.13 | 16.3            | —              | 7.929             | 7.954             | —    | —    | —   |
| ZrCl <sub>2</sub> | HTP                       | $P_{21}/m(11)$ | $P\bar{6}m2(187)$ | $P_{21}/m(11)$ | 7.11               | 6.71  | 61.8  | 60.1           | 6.84  | 6.84  | 6.84            | 60.1           | 0.436             | 0.440             | 0.0  | —    | 0.0 |
| ZrBr <sub>2</sub> | HTP                       | $P_{21}/m(11)$ | $P\bar{6}m2(187)$ | $P_{21}/m(11)$ | 7.01               | 7.40  | 61.6  | 60.1           | 7.13  | 7.13  | 7.13            | 56.3           | 0.024             | 0.028             | 0.0  | —    | 0.0 |
| ZrI <sub>2</sub>  | TPH                       | $P_{21}/m(11)$ | $P\bar{6}m2(187)$ | $P_{21}/m(11)$ | 7.57               | 7.88  | 61.3  | 60.0           | 7.69  | 7.69  | 7.69            | 61.3           | 0.035             | 0.337             | 0.0  | —    | 0.0 |
| NbCa <sub>2</sub> | THX                       | $P_{21}/m(11)$ | $Pmna(51)$        | —              | 6.86               | 10.30 | 48.0  | 46.5           | 6.92  | 10.11 | 10.11           | 46.5           | 0.468             | 14.491            | 0.0  | —    | —   |
| NbRu <sub>2</sub> | TXX                       | $P_{21}/m(11)$ | —                 | —              | 9.02               | 7.79  | 30.2  | —              | —     | —     | —               | —              | 2.016             | 2.038             | 0.0  | —    | —   |
| NbTe <sub>2</sub> | HTX                       | $P_{21}/m(11)$ | $P\bar{6}m2(187)$ | $P_{21}/m(11)$ | 7.52               | 7.51  | 54.3  | 60.0           | 7.40  | 7.40  | 7.40            | 60.0           | 0.124             | 1.416             | 0.0  | —    | 0.0 |
| MoP <sub>2</sub>  | PXX                       | —              | —                 | —              | —                  | —     | —     | —              | —     | —     | —               | —              | —                 | —                 | —    | —    | —   |
| MoTe <sub>2</sub> | THP                       | $P_{21}/m(11)$ | $P\bar{6}m2(187)$ | $P_{21}/m(11)$ | 7.29               | 7.28  | 57.3  | 60.1           | 7.16  | 7.16  | 7.16            | 63.6           | 1.389             | 3.230             | —    | —    | 0.0 |
| RuO <sub>2</sub>  | TPX                       | $P_{21}/m(11)$ | —                 | $P_{21}/m(11)$ | 6.19               | 5.77  | 57.7  | —              | 6.14  | 6.91  | 6.91            | 57.0           | 0.006             | 0.064             | 0.0  | —    | 0.0 |
| RuP <sub>2</sub>  | PHT                       | $P_{21}/m(11)$ | $Pmnm(59)$        | $Pmnm(59)$     | 7.89               | 7.89  | 43.4  | 45.9           | 7.58  | 7.59  | 7.59            | 57.6           | 0.066             | 3.979             | 0.0  | —    | 0.0 |
| RuS <sub>2</sub>  | TPX                       | $P_{21}/m(11)$ | $C2/m(12)$        | $C2/m(12)$     | 6.94               | 6.60  | 58.3  | —              | 7.58  | 8.04  | 8.04            | 68.5           | 0.004             | 0.305             | 0.0  | —    | 0.0 |
| RuCa <sub>2</sub> | TXX                       | $P_{21}/m(11)$ | —                 | —              | 8.83               | 7.22  | 52.3  | —              | —     | 6.57  | 6.57            | 58.3           | 0.210             | 3.164             | 0.0  | —    | —   |
| RuSe <sub>2</sub> | TXX                       | $P_{21}/m(11)$ | —                 | —              | 7.22               | 6.86  | 58.2  | —              | —     | —     | —               | —              | 1.040             | 1.344             | 0.0  | —    | —   |
| RuTe <sub>2</sub> | PTH                       | $P_{21}/m(11)$ | —                 | $P_{21}/m(11)$ | 7.30               | 7.69  | 58.3  | —              | 7.33  | 7.72  | 7.72            | 57.9           | 0.017             | 1.365             | 0.0  | —    | 0.0 |
| RuOs <sub>2</sub> | TXX                       | $P_{21}/m(11)$ | —                 | $P_{21}/m(11)$ | 8.36               | 8.36  | 37.6  | —              | —     | —     | —               | —              | 2.201             | 2.763             | 0.0  | —    | —   |
| RhY <sub>2</sub>  | PTH                       | $P_{21}/m(11)$ | $P\bar{6}m2(187)$ | $P_{21}/m(11)$ | 8.22               | 8.23  | 59.9  | —              | 10.37 | 8.57  | 8.57            | 33.8           | 2.801             | 5.282             | 0.0  | —    | —   |
| CdCa <sub>2</sub> | PTH                       | $C2/m(12)$     | $P\bar{6}m2(187)$ | $P_{21}/m(11)$ | 8.05               | 8.07  | 59.1  | 59.5           | 7.91  | 7.90  | 7.90            | 54.1           | 0.438             | 0.706             | 0.0  | —    | 0.0 |
| InS <sub>2</sub>  | PXX                       | —              | —                 | —              | —                  | —     | —     | —              | —     | —     | —               | —              | —                 | —                 | —    | —    | —   |
| InTe <sub>2</sub> | HTP                       | $C2/m(12)$     | $C222(21)$        | $P_{21}/m(11)$ | 8.51               | 8.50  | 47.8  | 46.2           | 8.53  | 8.53  | 8.53            | 46.2           | 0.058             | 0.390             | 0.0  | —    | 0.0 |
| SnCl <sub>2</sub> | TPX                       | $P_{21}/m(11)$ | —                 | $P_{21}/m(11)$ | 8.91               | 8.91  | 57.2  | —              | 8.90  | 9.24  | 9.24            | 68.7           | 0.058             | 0.390             | 0.0  | —    | 0.0 |
| SnCr <sub>2</sub> | HTX                       | $P_{21}/m(11)$ | $C2/m(12)$        | $P_{21}/m(11)$ | 8.19               | 8.23  | 45.0  | —              | 7.40  | 8.91  | 8.91            | 57.1           | 0.024             | 1.262             | 0.0  | —    | 0.0 |
| TeLi <sub>2</sub> | PTH                       | $P_{21}/m(11)$ | —                 | $P_{21}/m(11)$ | 9.17               | 9.17  | 59.3  | —              | —     | —     | —               | —              | 0.589             | 1.785             | 34.3 | —    | —   |
| TeCa <sub>2</sub> | THX                       | $P_{21}/m(11)$ | $P\bar{6}m2(187)$ | $P_{21}/m(11)$ | 8.45               | 9.16  | 62.8  | —              | 8.41  | 9.13  | 9.13            | 59.5           | 0.038             | 1.715             | 0.0  | —    | 0.0 |
| TeSe <sub>2</sub> | TPX                       | —              | —                 | —              | —                  | —     | —     | —              | —     | —     | —               | —              | —                 | —                 | —    | —    | —   |
| TeTe <sub>2</sub> | HPT                       | $P_{21}/m(11)$ | $P\bar{6}m2(187)$ | $P_{21}/m(11)$ | 7.64               | 8.55  | 63.8  | 59.7           | 8.41  | 8.37  | 8.37            | 59.7           | 0.767             | 0.919             | 0.0  | —    | —   |
| IK <sub>2</sub>   | TPH                       | $P_{21}/m(11)$ | $P\bar{6}m2(187)$ | $P_{21}/m(11)$ | 9.79               | 9.80  | 58.4  | 58.4           | 9.28  | 9.32  | 9.32            | 58.4           | 0.032             | 0.034             | 0.0  | —    | 0.0 |
| CsTi <sub>2</sub> | TPX                       | $C2/m(12)$     | $P\bar{6}m2(187)$ | $P_{21}/m(11)$ | 9.84               | 9.86  | 59.0  | 56.2           | 10.00 | 9.98  | 9.98            | 90.0           | 0.041             | 0.189             | 0.0  | —    | 0.0 |
| HfF <sub>2</sub>  | HTP                       | $P_{21}/m(11)$ | —                 | $P_{21}/m(11)$ | 15.60              | 15.58 | 41.9  | 41.8           | 15.61 | 15.60 | 15.60           | 41.8           | 0.041             | 4.172             | 0.0  | —    | 0.0 |
| HfCl <sub>2</sub> | HTP                       | $P_{21}/m(11)$ | $P\bar{6}m2(187)$ | $P_{21}/m(11)$ | 6.99               | 6.98  | 50.7  | 59.9           | 6.08  | 6.08  | 6.08            | 64.7           | 0.463             | 0.726             | 0.0  | —    | 0.0 |
| HfBr <sub>2</sub> | HTP                       | $P_{21}/m(11)$ | $P\bar{6}m2(187)$ | $P_{21}/m(11)$ | 6.57               | 6.98  | 61.8  | 60.2           | 6.69  | 6.69  | 6.69            | 56.1           | 0.536             | 0.536             | 0.0  | —    | 0.0 |
| HfI <sub>2</sub>  | TPH                       | $P_{21}/m(11)$ | $P\bar{6}m2(187)$ | $P_{21}/m(11)$ | 6.88               | 7.28  | 61.8  | 60.1           | 6.99  | 6.99  | 6.99            | 56.4           | 0.001             | 0.039             | 0.0  | —    | 0.0 |
| TaAs <sub>2</sub> | PTH                       | $C2/m(12)$     | $P\bar{6}m2(187)$ | $P_{21}/m(11)$ | 7.59               | 7.84  | 59.7  | 59.8           | 7.56  | 7.56  | 7.56            | 57.3           | 0.231             | 0.516             | 0.0  | —    | 0.0 |
| TaAs <sub>2</sub> | TPX                       | $P_{21}/m(11)$ | —                 | $P_{21}/m(11)$ | 7.58               | 7.59  | 51.6  | —              | —     | —     | —               | —              | 0.173             | 1.714             | 0.0  | —    | 0.0 |
| TaTe <sub>2</sub> | PTH                       | $P_{21}/m(11)$ | $P\bar{6}m2(187)$ | $C2/m(12)$     | 7.50               | 7.50  | 54.7  | 59.9           | 7.44  | 7.43  | 7.43            | 55.4           | 0.111             | 0.115             | 0.0  | —    | 0.0 |
| TaBi <sub>2</sub> | TPX                       | $C2/m(12)$     | —                 | $P_{21}/m(11)$ | 7.10               | 7.11  | 53.7  | —              | 8.00  | 8.00  | 8.00            | 47.9           | 0.322             | 5.303             | 0.0  | —    | 0.0 |

(Continued on next page)

Table 2: List of  $P2_1/m(11)$ 

| species           | Initial structure indices | space group   |                   |               | lattice parameters |       |       |                |       |       | relative energy |                |                   | spin moment       |     |     |     |
|-------------------|---------------------------|---------------|-------------------|---------------|--------------------|-------|-------|----------------|-------|-------|-----------------|----------------|-------------------|-------------------|-----|-----|-----|
|                   |                           | T             | H                 | P             | a [Å]              | b [Å] | c [Å] | $\gamma$ [deg] | a [Å] | b [Å] | c [Å]           | $\gamma$ [deg] | $\Delta E_1$ [eV] | $\Delta E_2$ [eV] | T   | H   | P   |
| WP <sub>2</sub>   | PXX                       | -             | -                 | $P2_1/m(11)$  | -                  | -     | -     | -              | 7.13  | 6.50  | -               | 62.8           | 1.196             | 3.803             | -   | -   | 0.0 |
| WSr <sub>2</sub>  | HPT                       | $P2_1/m(11)$  | $P\bar{1}(2)$     | $P2_1/m(11)$  | 8.17               | 7.80  | 58.5  | 53.0           | 8.23  | 9.00  | 53.0            | 58.2           | 0.192             | 0.208             | 0.0 | 0.0 | 0.0 |
| WTe <sub>2</sub>  | TPH                       | $P2_1/m(11)$  | $P\bar{6}m2(187)$ | $P2_1/m(11)$  | 7.05               | 7.27  | 61.0  | 60.0           | 7.27  | 7.18  | 60.0            | 61.0           | 0.004             | 0.473             | 0.0 | 0.0 | 0.0 |
| ReBi <sub>2</sub> | TPX                       | $P2_1/m(11)$  | -                 | $P\bar{1}(2)$ | 7.38               | 7.37  | 54.4  | -              | 7.37  | -     | -               | -              | 0.382             | 1.551             | 0.0 | -   | 0.0 |
| OsS <sub>2</sub>  | TPX                       | $P2_1/m(11)$  | -                 | $P2_1/m(11)$  | 6.63               | 7.11  | 57.6  | -              | 7.11  | -     | -               | 54.2           | 0.005             | 3.611             | 0.0 | -   | 0.0 |
| OsSe <sub>2</sub> | TPX                       | $P2_1/m(11)$  | -                 | $P2_1/m(11)$  | 6.87               | 7.37  | 57.6  | -              | 7.37  | -     | -               | 57.6           | 0.005             | 3.117             | 0.0 | -   | 0.0 |
| OsTe <sub>2</sub> | TPX                       | $P2_1/m(11)$  | -                 | $C2/m(12)$    | 7.80               | 7.32  | 57.8  | -              | 7.79  | -     | -               | 57.6           | 0.221             | 3.032             | 0.0 | -   | 0.0 |
| IrAl <sub>2</sub> | THX                       | $P2_1/m(11)$  | $Pmmm(47)$        | -             | 8.48               | 6.52  | 49.5  | -              | 8.80  | 6.84  | 39.0            | -              | 0.307             | 2.068             | 0.0 | 0.0 | -   |
| IrCa <sub>2</sub> | PHX                       | $P2_1/m(11)$  | $P4/mmm(123)$     | $P2_1/m(11)$  | 7.25               | 8.03  | 56.3  | -              | 6.95  | 9.83  | 45.0            | 52.8           | 0.250             | 2.053             | -   | 0.0 | 0.0 |
| IrSb <sub>2</sub> | TXX                       | $P2_1/m(11)$  | -                 | -             | 8.73               | 8.72  | 58.9  | -              | 8.37  | 8.39  | 43.6            | -              | 0.937             | 1.265             | 0.0 | -   | -   |
| PtTi <sub>2</sub> | PHT                       | $P3m1(164)$   | $Amm2(38)$        | $P2_1/m(11)$  | 7.39               | 8.04  | 57.0  | -              | 7.24  | 7.22  | 60.0            | 57.0           | 0.005             | 0.093             | 0.0 | 0.0 | 0.0 |
| PtPb <sub>2</sub> | TPH                       | $P2_1/m(11)$  | $P\bar{6}(174)$   | $P2_1/m(11)$  | 9.75               | 7.58  | 48.7  | -              | 7.50  | 10.43 | 42.6            | -              | 0.005             | 0.141             | 0.0 | 0.0 | 0.0 |
| AuNa <sub>2</sub> | THX                       | $P2_1/m(11)$  | $Cmmm(65)$        | -             | 10.14              | 10.17 | 60.1  | -              | 10.04 | 10.00 | 55.1            | -              | 0.527             | 3.404             | 0.0 | 0.0 | -   |
| AuRb <sub>2</sub> | THP                       | $P3m1(164)$   | $Amm2(38)$        | $P2_1/m(11)$  | 8.11               | 8.10  | 59.9  | -              | 8.01  | 7.99  | 59.8            | 61.3           | 0.024             | 0.917             | 0.0 | -   | 0.0 |
| AuTe <sub>2</sub> | TPX                       | $P3m1(164)$   | -                 | $P2_1/m(11)$  | 7.78               | 9.09  | 54.1  | -              | 8.60  | 12.17 | 45.0            | 59.8           | 0.167             | 0.272             | 0.0 | 0.0 | 0.0 |
| HgCa <sub>2</sub> | THP                       | $P2_1/m(11)$  | $P\bar{6}m2(187)$ | $P3m1(164)$   | 10.50              | 13.65 | 30.6  | -              | 8.60  | 12.17 | 45.0            | 52.3           | 0.492             | 1.832             | -   | 0.0 | 0.0 |
| TiBa <sub>2</sub> | HPX                       | -             | $P4/mmm(123)$     | $P2_1/m(11)$  | 7.87               | 7.86  | 59.6  | -              | 8.60  | 12.17 | 45.0            | 50.1           | 0.606             | 6.198             | 0.0 | -   | 0.0 |
| BiSi <sub>2</sub> | P <sub>2</sub> TX         | $P\bar{1}(2)$ | -                 | $P2_1/m(11)$  | 9.36               | 8.46  | 63.0  | -              | 9.48  | 8.47  | 55.8            | 63.7           | 0.397             | 2.636             | 0.0 | -   | 0.0 |
| BiS <sub>2</sub>  | P <sub>2</sub> TX         | $P3m1(164)$   | -                 | $P2_1/m(11)$  | 10.20              | 10.20 | 59.7  | -              | 10.36 | 10.18 | 60.7            | 60.7           | 0.022             | 1.152             | 0.0 | -   | 0.0 |
| BiY <sub>2</sub>  | TPX                       | $P2_1/m(11)$  | -                 | $Cm(8)$       | 9.36               | 8.46  | 63.0  | -              | 9.48  | 8.47  | 55.8            | 63.7           | 0.397             | 2.636             | 0.0 | -   | 0.0 |
| BiBa <sub>2</sub> | TPX                       | $P3m1(164)$   | -                 | $P2_1/m(11)$  | 10.20              | 10.20 | 59.7  | -              | 10.36 | 10.18 | 60.7            | 60.7           | 0.022             | 1.152             | 0.0 | -   | 0.0 |

Table 3: List of  $P4mmm(123)$ 

| species           | Initial structure indices | space group |                   |   | lattice parameters |       |       |                |       |       | relative energy |                | spin moment       |                   |      |      |      |     |
|-------------------|---------------------------|-------------|-------------------|---|--------------------|-------|-------|----------------|-------|-------|-----------------|----------------|-------------------|-------------------|------|------|------|-----|
|                   |                           | T           | H                 | P | a [Å]              | b [Å] | c [Å] | $\gamma$ [deg] | a [Å] | b [Å] | c [Å]           | $\gamma$ [deg] | $\Delta E_1$ [eV] | $\Delta E_2$ [eV] | T    | H    | P    |     |
| LiIn <sub>2</sub> | HXX                       | -           | $P4/mmm(123)$     | - | 6.38               | 9.07  | 43.7  | -              | -     | -     | -               | 1.741          | 2.532             | -                 | 0.0  | -    | -    |     |
| LiSn <sub>2</sub> | HXX                       | -           | $P4/mmm(123)$     | - | 8.75               | 6.47  | 42.0  | -              | -     | -     | -               | 3.741          | 3.823             | -                 | 0.0  | -    | -    |     |
| LiBa <sub>2</sub> | HXX                       | -           | $P4/mmm(123)$     | - | 12.24              | 8.58  | 44.8  | -              | -     | -     | -               | 1.109          | 6.245             | -                 | 0.0  | -    | -    |     |
| LiHg <sub>2</sub> | HXX                       | -           | $P4/mmm(123)$     | - | 6.35               | 9.05  | 44.4  | -              | -     | -     | -               | 1.491          | 1.549             | -                 | 0.0  | -    | -    |     |
| BeSe <sub>2</sub> | HPX                       | -           | $P\bar{1}(2)$     | - | 6.24               | 8.83  | 45.1  | -              | -     | 6.32  | 7.48            | 0.259          | 0.904             | -                 | 0.0  | 2.3  | -    |     |
| BeMn <sub>2</sub> | HXX                       | -           | $P4/mmm(123)$     | - | 7.38               | 5.24  | 45.2  | -              | -     | -     | -               | 0.953          | 8.523             | -                 | 29.3 | -    | -    |     |
| BeAg <sub>2</sub> | THX                       | -           | $P4/mmm(123)$     | - | 8.01               | 5.65  | 44.8  | -              | -     | -     | -               | 0.552          | 5.148             | -                 | 0.0  | 0.0  | -    |     |
| MgSc <sub>2</sub> | HXX                       | -           | $P4/mmm(123)$     | - | -                  | -     | -     | -              | -     | -     | -               | 3.061          | 9.615             | -                 | 0.0  | 0.0  | -    |     |
| AlAl <sub>2</sub> | THX                       | -           | $P4/mmm(123)$     | - | 5.51               | 5.51  | 62.7  | -              | -     | -     | -               | 0.676          | 6.286             | -                 | 0.0  | 0.0  | -    |     |
| AlCu <sub>2</sub> | HPX                       | -           | $P\bar{1}(2)$     | - | 10.35              | 7.31  | 45.0  | -              | -     | 9.17  | 7.55            | 0.024          | 2.832             | -                 | 0.0  | 0.0  | 0.0  |     |
| AlSc <sub>2</sub> | HXX                       | -           | $P4/mmm(123)$     | - | 8.77               | 6.20  | 45.0  | -              | -     | -     | -               | 1.330          | 1.376             | -                 | 0.0  | 0.0  | -    |     |
| AlY <sub>2</sub>  | HXX                       | -           | $P4/mmm(123)$     | - | 9.56               | 6.76  | 45.1  | -              | -     | -     | -               | 0.888          | 4.155             | -                 | 0.0  | 0.0  | -    |     |
| AlRh <sub>2</sub> | PHX                       | -           | $P4/mmm(123)$     | - | 7.78               | 5.50  | 45.0  | -              | -     | 6.78  | 7.81            | 0.265          | 1.125             | -                 | 0.0  | 0.0  | 0.0  |     |
| AlAg <sub>2</sub> | THX                       | -           | $P4/mmm(123)$     | - | 7.19               | 8.24  | 43.0  | -              | -     | -     | -               | 0.366          | 3.429             | -                 | 0.0  | 0.0  | -    |     |
| AlBa <sub>2</sub> | HPX                       | -           | $P4/mmm(123)$     | - | -                  | -     | -     | -              | -     | 9.58  | 10.87           | 0.688          | 2.324             | -                 | 0.0  | 0.0  | 0.0  |     |
| AlPt <sub>2</sub> | THX                       | -           | $P4/mmm(123)$     | - | 8.00               | 5.65  | 44.7  | -              | -     | -     | -               | 0.212          | 6.625             | -                 | 0.0  | 0.0  | -    |     |
| AlAu <sub>2</sub> | THX                       | -           | $P4/mmm(123)$     | - | 8.03               | 6.92  | 43.7  | -              | -     | -     | -               | 0.701          | 2.688             | -                 | 0.0  | 0.0  | -    |     |
| KCl <sub>2</sub>  | THX                       | -           | $P4/mmm(123)$     | - | 8.54               | 12.06 | 45.0  | -              | -     | -     | -               | 0.294          | 1.368             | -                 | 0.0  | 0.0  | -    |     |
| KBr <sub>2</sub>  | PTX                       | -           | $P4/mmm(123)$     | - | 9.94               | 9.94  | 53.0  | -              | -     | -     | -               | 0.683          | 1.014             | -                 | 4.0  | -    | 0.0  |     |
| CaO <sub>2</sub>  | PHX                       | -           | $P\bar{6}m2(187)$ | - | -                  | -     | -     | -              | -     | 7.49  | 7.48            | 60.6           | 0.615             | 7.585             | -    | 0.0  | 0.0  | 0.0 |
| CaS <sub>2</sub>  | PHX                       | -           | $P\bar{6}m2(187)$ | - | -                  | -     | -     | -              | -     | 9.02  | 9.01            | 58.4           | 0.388             | 7.064             | -    | 0.0  | 0.0  | 0.0 |
| CaSe <sub>2</sub> | THX                       | -           | $P\bar{6}m2(187)$ | - | 8.00               | 11.36 | 44.9  | -              | -     | 9.37  | 9.38            | 58.2           | 0.335             | 1.768             | -    | 0.0  | 0.0  | 0.0 |
| ScCa <sub>2</sub> | HTX                       | -           | $P4/mmm(123)$     | - | 7.35               | 10.44 | 44.6  | -              | -     | 7.32  | 10.32           | 45.2           | 0.003             | 9.863             | -    | 0.0  | 0.0  | -   |
| ScSc <sub>2</sub> | HXX                       | -           | $P4/mmm(123)$     | - | -                  | -     | -     | -              | -     | 6.56  | 9.28            | 45.0           | 5.445             | 12.533            | -    | 0.0  | 0.0  | -   |
| ScAg <sub>2</sub> | HTX                       | -           | $P4/mmm(123)$     | - | 6.11               | 8.71  | 44.6  | -              | -     | 6.10  | 8.67            | 44.7           | 0.005             | 6.321             | -    | 0.0  | 0.0  | -   |
| ScIn <sub>2</sub> | HXX                       | -           | $P4/mmm(123)$     | - | -                  | -     | -     | -              | -     | 6.75  | 9.55            | 45.2           | 5.359             | 5.523             | -    | 0.0  | 0.0  | -   |
| ScPt <sub>2</sub> | THX                       | -           | $Cmme(67)$        | - | 8.24               | 10.28 | 29.8  | -              | -     | 5.91  | 8.33            | 45.1           | 0.742             | 6.458             | -    | 0.0  | 0.0  | -   |
| ScAu <sub>2</sub> | HTX                       | -           | $P4/mmm(123)$     | - | 8.12               | 6.79  | 51.1  | -              | -     | 6.47  | 9.14            | 44.9           | 0.019             | 4.427             | -    | 0.0  | 0.0  | -   |
| ScHg <sub>2</sub> | THX                       | -           | $P\bar{6}m2(187)$ | - | 6.60               | 9.37  | 44.8  | -              | -     | 7.03  | 6.76            | 58.3           | 0.457             | 3.630             | -    | 0.0  | 0.0  | -   |
| ScBi <sub>2</sub> | THP                       | -           | $P4/mmm(123)$     | - | 11.21              | 8.36  | 40.9  | -              | -     | 8.35  | 11.21           | 41.0           | 0.028             | 0.076             | -    | 0.0  | 0.0  | 0.0 |
| TiBe <sub>2</sub> | THP                       | -           | $P4/mmm(123)$     | - | 5.26               | 7.31  | 43.8  | -              | -     | 7.30  | 5.26            | 43.9           | 0.027             | 0.467             | -    | 0.0  | 0.0  | 0.0 |
| TiMg <sub>2</sub> | THX                       | -           | $P4/mmm(123)$     | - | 6.14               | 8.75  | 44.4  | -              | -     | 6.04  | 8.60            | 44.5           | 0.025             | 10.966            | -    | 0.0  | 0.0  | -   |
| TiAl <sub>2</sub> | HTX                       | -           | $Pnma(51)$        | - | 9.02               | 6.93  | 39.8  | -              | -     | 8.08  | 5.57            | 43.5           | 0.695             | 8.486             | -    | 0.0  | 0.0  | -   |
| TiCu <sub>2</sub> | HTX                       | -           | $Pnma(51)$        | - | 10.20              | 7.09  | 45.9  | -              | -     | 10.33 | 7.30            | 44.9           | 0.530             | 11.273            | -    | 8.6  | 9.6  | -   |
| TiIn <sub>2</sub> | THX                       | -           | $P4/mmm(123)$     | - | 6.24               | 8.81  | 45.0  | -              | -     | 9.05  | 6.39            | 45.2           | 0.062             | 8.034             | -    | 0.0  | 0.0  | -   |
| TiHf <sub>2</sub> | PHX                       | -           | $P4/mmm(123)$     | - | -                  | -     | -     | -              | -     | 6.01  | 8.51            | 45.0           | 0.179             | 6.492             | -    | 0.0  | 0.0  | 0.0 |
| TiTi <sub>2</sub> | HTX                       | -           | $Cmnm(65)$        | - | 6.71               | 9.49  | 44.8  | -              | -     | 9.77  | 7.01            | 43.5           | 0.061             | 6.409             | -    | 0.0  | 0.0  | -   |
| VBe <sub>2</sub>  | PXX                       | -           | $P4/mmm(123)$     | - | 4.80               | 6.81  | 44.4  | -              | -     | 6.81  | 4.81            | 44.8           | 0.003             | 9.537             | -    | 0.0  | 0.0  | -   |
| VSc <sub>2</sub>  | THX                       | -           | $P4/mmm(123)$     | - | 5.89               | 8.37  | 44.3  | -              | -     | 5.88  | 8.31            | 44.9           | 0.228             | 1.508             | -    | 0.0  | 0.0  | -   |
| VTi <sub>2</sub>  | THX                       | -           | $P4/mmm(123)$     | - | 5.79               | 8.22  | 44.9  | -              | -     | 5.77  | 8.22            | 44.6           | 0.023             | 4.235             | -    | 0.0  | 0.0  | -   |
| VNi <sub>2</sub>  | PTH                       | -           | $P4/mmm(123)$     | - | 9.96               | 7.04  | 44.8  | -              | -     | 6.99  | 9.84            | 44.7           | 0.366             | 0.558             | -    | 9.8  | 6.2  | 0.0 |
| VY <sub>2</sub>   | TPH                       | -           | $P4/mmm(123)$     | - | 6.31               | 8.91  | 45.0  | -              | -     | 6.30  | 8.91            | 45.1           | 0.001             | 0.004             | -    | 0.0  | 0.0  | 0.0 |
| VZr <sub>2</sub>  | PHX                       | -           | $P4/mmm(123)$     | - | 6.26               | 9.01  | 43.8  | -              | -     | 6.92  | 9.80            | 44.9           | 0.758             | 4.917             | -    | 12.5 | 0.5  | -   |
| VPb <sub>2</sub>  | THX                       | -           | $P4/mmm(123)$     | - | 6.35               | 8.44  | 41.2  | -              | -     | 6.25  | 8.95            | 44.1           | 0.060             | 5.738             | -    | 14.8 | 14.8 | -   |
| CrMg <sub>2</sub> | THX                       | -           | $P4/mmm(123)$     | - | 7.62               | 8.88  | 54.4  | -              | -     | 5.94  | 8.41            | 45.0           | 0.040             | 5.287             | -    | 0.0  | 0.0  | -   |
| CrAl <sub>2</sub> | THX                       | -           | $P4/mmm(123)$     | - | 6.42               | 9.09  | 44.9  | -              | -     | 7.42  | 10.52           | 44.9           | 0.640             | 8.018             | -    | 17.7 | 17.7 | -   |
| CrCr <sub>2</sub> | PHT                       | -           | $P4/mmm(123)$     | - | 6.42               | 9.09  | 45.0  | -              | -     | 8.00  | 5.65            | 44.9           | 0.209             | 0.213             | -    | 7.0  | 7.0  | 0.0 |
| CrMn <sub>2</sub> | HXX                       | -           | $P4/mmm(123)$     | - | -                  | -     | -     | -              | -     | 8.00  | 5.65            | 44.9           | 11.904            | 16.133            | -    | 23.7 | -    | -   |
| CrGa <sub>2</sub> | THX                       | -           | $P4/mmm(123)$     | - | 5.95               | 8.45  | 44.8  | -              | -     | 5.97  | 8.46            | 44.7           | 0.039             | 5.490             | -    | 10.4 | 10.3 | -   |
| CrSr <sub>2</sub> | PHX                       | -           | $P4/mmm(123)$     | - | -                  | -     | -     | -              | -     | 7.97  | 11.30           | 44.9           | 0.577             | 1.952             | -    | 19.1 | 17.3 | -   |
| CrY <sub>2</sub>  | HTP                       | -           | $P4/mmm(123)$     | - | 8.81               | 6.98  | 53.0  | -              | -     | 6.86  | 9.72            | 44.9           | 0.498             | 0.712             | -    | 7.6  | 6.1  | 7.8 |
| CrZr <sub>2</sub> | PHT                       | -           | $P4/mmm(123)$     | - | 8.68               | 6.38  | 45.3  | -              | -     | 6.29  | 8.64            | 46.4           | 0.094             | 0.119             | -    | 0.0  | 0.0  | 0.0 |
| CrSh <sub>2</sub> | HXX                       | -           | $P4/mmm(123)$     | - | -                  | -     | -     | -              | -     | 8.80  | 6.45            | 42.3           | 4.969             | 7.754             | -    | 14.5 | -    | -   |
| CrHf <sub>2</sub> | HXX                       | -           | $P4/mmm(123)$     | - | 6.24               | 8.82  | 45.0  | -              | -     | 6.24  | 8.82            | 45.0           | 2.721             | 5.543             | -    | 0.0  | 0.0  | -   |
| MnBe <sub>2</sub> | THX                       | -           | $Cmnm(65)$        | - | 5.15               | 7.25  | 45.2  | -              | -     | 4.60  | 7.51            | 35.3           | 0.801             | 7.736             | -    | 7.7  | 7.0  | -   |
| MnCa <sub>2</sub> | TPH                       | -           | $P4/mmm(123)$     | - | 7.55               | 8.78  | 54.5  | -              | -     | 7.37  | 10.46           | 44.7           | 0.441             | 0.589             | -    | 14.7 | 14.8 | -   |

(Continued on next page)

Table 3: List of  $P4mmm(123)$ 

| species           | Initial structure indices | space group   |               |               | lattice parameters |       |       |                |       |       | relative energy |                |                   | spin moment       |      |      |      |
|-------------------|---------------------------|---------------|---------------|---------------|--------------------|-------|-------|----------------|-------|-------|-----------------|----------------|-------------------|-------------------|------|------|------|
|                   |                           | T             | H             | P             | a [Å]              | b [Å] | c [Å] | $\gamma$ [deg] | a [Å] | b [Å] | c [Å]           | $\gamma$ [deg] | $\Delta E_1$ [eV] | $\Delta E_2$ [eV] | T    | H    | P    |
| MnS <sub>2</sub>  | PHT                       | $P1(2)$       | $P4/mmm(123)$ | $P2_1/m(11)$  | 6.56               | 8.25  | 53.2  | 44.9           | 6.81  | 8.28  | 52.2            | 0.107          | 0.154             | 5.8               | 0.0  | 5.1  |      |
| MnMn <sub>2</sub> | HXX                       | —             | $P4/mmm(123)$ | —             | 5.56               | 7.87  | 45.0  | 45.0           | —     | —     | —               | 9.663          | 13.770            | —                 | 27.3 | —    |      |
| MnZr <sub>2</sub> | THP                       | $P4/mmm(123)$ | $P4/mmm(123)$ | $P1(2)$       | 6.23               | 8.86  | 44.6  | 45.1           | 6.83  | 6.35  | 58.3            | 0.015          | 0.188             | 0.0               | 0.0  | 0.0  |      |
| MnIn <sub>2</sub> | HTX                       | $P4/mmm(123)$ | $P4/mmm(123)$ | —             | 6.36               | 9.06  | 45.4  | 45.3           | —     | —     | —               | 0.000          | 4.674             | 15.2              | 15.2 | —    |      |
| MnAu <sub>2</sub> | HTX                       | $P3m1(164)$   | $P4/mmm(123)$ | —             | 5.96               | 5.96  | 59.3  | 52.5           | —     | —     | —               | 0.711          | 3.227             | 17.2              | 18.0 | —    |      |
| MnPb <sub>2</sub> | PHX                       | —             | $P4/mmm(123)$ | $P4/mmm(123)$ | 7.37               | 5.21  | 45.0  | 43.5           | 7.18  | 7.84  | 62.6            | 0.124          | 3.399             | —                 | 15.7 | 15.9 |      |
| FeBe <sub>2</sub> | HTX                       | $P4/mmm(123)$ | $P4/mmm(123)$ | —             | 7.29               | 5.15  | 45.0  | 45.0           | —     | —     | —               | 0.475          | 9.512             | 0.0               | 5.0  | —    |      |
| FeAl <sub>2</sub> | HTX                       | $P4/mmm(123)$ | $P4/mmm(123)$ | —             | 5.68               | 8.05  | 45.0  | 45.0           | —     | —     | —               | 0.092          | 7.347             | 0.0               | 1.8  | —    |      |
| FeSe <sub>2</sub> | THX                       | $P4/mmm(123)$ | $P4/mmm(123)$ | —             | 6.20               | 8.77  | 45.1  | 44.9           | —     | —     | —               | 0.002          | 1.286             | 0.0               | 0.0  | —    |      |
| CoAl <sub>2</sub> | THX                       | $P4/mmm(123)$ | $P4/mmm(123)$ | —             | 5.72               | 7.87  | 43.2  | 45.7           | —     | —     | —               | 0.020          | 6.863             | 0.0               | 0.0  | —    |      |
| NiBe <sub>2</sub> | THX                       | $P3m1(164)$   | $P4/mmm(123)$ | —             | 7.41               | 6.38  | 29.8  | 44.9           | —     | —     | —               | 0.315          | 6.864             | 0.0               | 0.0  | —    |      |
| NiHg <sub>2</sub> | HXX                       | —             | $P4/mmm(123)$ | —             | 8.51               | 5.99  | 43.8  | 43.8           | —     | —     | —               | 3.814          | 3.885             | —                 | 0.0  | —    |      |
| GaCa <sub>2</sub> | PTH                       | $P4/mmm(123)$ | $P4/mmm(123)$ | $P2_1/m(11)$  | 7.31               | 10.40 | 44.8  | 44.6           | 7.60  | 8.94  | 53.3            | 0.226          | 0.265             | 0.0               | 0.0  | 0.0  |      |
| GaCr <sub>2</sub> | TXX                       | $P4/mmm(123)$ | —             | —             | 6.04               | 8.64  | 43.3  | —              | —     | —     | —               | 0.958          | 5.749             | 33.7              | —    | —    |      |
| GaMn <sub>2</sub> | HXX                       | —             | $P4/mmm(123)$ | —             | —                  | —     | —     | —              | —     | —     | —               | 3.209          | 4.275             | —                 | 31.7 | —    |      |
| GaY <sub>2</sub>  | PHX                       | —             | $P4/mmm(123)$ | $C2/m(12)$    | 5.78               | 8.35  | 41.9  | 44.9           | 8.50  | 9.40  | 46.9            | 0.142          | 2.547             | —                 | 0.0  | 0.0  |      |
| GeCr <sub>2</sub> | THX                       | —             | $P4/mmm(123)$ | —             | 7.43               | 7.87  | 58.0  | 44.8           | —     | —     | —               | 0.593          | 2.554             | 31.9              | 32.5 | —    |      |
| RbF <sub>2</sub>  | THX                       | $P2_1/m(11)$  | $P4/mmm(123)$ | —             | 7.81               | 11.09 | 44.7  | 57.0           | —     | —     | —               | 0.508          | 1.140             | 4.0               | 4.0  | —    |      |
| RbCl <sub>2</sub> | THX                       | $P4/mmm(123)$ | $P6m2(187)$   | —             | 8.99               | 12.73 | 45.1  | 56.7           | —     | —     | —               | 0.349          | 1.122             | 4.0               | 4.0  | —    |      |
| RbBr <sub>2</sub> | THX                       | $P4/mmm(123)$ | $P6m2(187)$   | —             | 9.35               | 13.21 | 44.9  | 57.6           | —     | —     | —               | 0.346          | 1.251             | 4.0               | 4.0  | —    |      |
| RbI <sub>2</sub>  | PTH                       | $P4/mmm(123)$ | —             | —             | 9.83               | 13.90 | 45.4  | —              | 13.39 | 13.96 | 65.6            | 0.748          | 1.166             | 4.0               | —    | 0.0  |      |
| SrS <sub>2</sub>  | PXX                       | —             | —             | —             | —                  | —     | —     | —              | 8.10  | 11.48 | 45.0            | 0.837          | 7.807             | —                 | —    | 0.0  |      |
| YN <sub>2</sub>   | PXX                       | —             | —             | —             | —                  | —     | —     | —              | 7.32  | 7.31  | 53.3            | 1.584          | 13.358            | —                 | —    | 0.0  |      |
| YP <sub>2</sub>   | HPX                       | —             | —             | —             | —                  | —     | —     | —              | 8.52  | 7.76  | 63.5            | 0.602          | 1.434             | —                 | —    | 0.0  |      |
| YAs <sub>2</sub>  | HXX                       | —             | $P4/mmm(123)$ | —             | 8.65               | 11.78 | 41.7  | 41.9           | —     | —     | —               | 2.041          | 2.109             | —                 | 0.0  | —    |      |
| ZrMg <sub>2</sub> | THX                       | —             | $P4/mmm(123)$ | —             | 6.58               | 9.37  | 42.1  | 44.9           | —     | —     | —               | 1.262          | 14.651            | 0.0               | —    | —    |      |
| ZrC <sub>2</sub>  | THX                       | $P4/mmm(123)$ | $P4/mmm(123)$ | —             | 7.16               | 10.14 | 45.0  | 44.9           | 10.16 | 7.18  | 44.9            | 0.017          | 13.243            | 0.0               | 0.0  | —    |      |
| ZrP <sub>2</sub>  | TPH                       | $P4/mmm(123)$ | $P4/mmm(123)$ | $P4/mmm(123)$ | 8.79               | 6.31  | 42.6  | 43.9           | 6.97  | 6.98  | 50.3            | 0.238          | 0.516             | 0.0               | 0.0  | 0.0  |      |
| ZrIn <sub>2</sub> | HPT                       | $P4/mmm(123)$ | $Pnma(51)$    | $P4/mmm(123)$ | 6.32               | 8.90  | 45.2  | 42.0           | 6.58  | 9.34  | 44.9            | 0.014          | 0.372             | 0.0               | 0.0  | 0.0  |      |
| ZrAu <sub>2</sub> | HTX                       | $P4/mmm(123)$ | $P4/mmm(123)$ | —             | 8.64               | 6.12  | 45.1  | 45.0           | —     | —     | —               | 0.009          | 7.649             | 0.0               | 0.0  | —    |      |
| ZrTi <sub>2</sub> | THX                       | $P4/mmm(123)$ | $Pnma(51)$    | —             | 9.89               | 7.07  | 43.7  | 41.4           | —     | —     | —               | 0.755          | 9.882             | 0.0               | 0.0  | —    |      |
| NbBe <sub>2</sub> | THX                       | $P4/mmm(123)$ | $P4/mmm(123)$ | —             | 7.84               | 5.43  | 43.8  | 43.7           | —     | —     | —               | 0.001          | 4.217             | 0.0               | 0.0  | —    |      |
| MoMn <sub>2</sub> | THX                       | $P4/mmm(123)$ | $P4/mmm(123)$ | —             | 6.15               | 8.72  | 43.9  | 45.0           | —     | —     | —               | 0.406          | 12.003            | 26.2              | 26.1 | —    |      |
| TcTi <sub>2</sub> | HXX                       | —             | $P4/mmm(123)$ | —             | —                  | —     | —     | —              | 8.64  | 6.11  | 45.0            | —              | 2.445             | 2.569             | —    | —    | —    |
| TcMn <sub>2</sub> | THX                       | $P4/mmm(123)$ | $P4/mmm(123)$ | —             | 8.44               | 5.97  | 44.9  | 45.4           | —     | —     | —               | 0.042          | 11.865            | 29.7              | 12.6 | —    |      |
| TcY <sub>2</sub>  | HXX                       | —             | $P4/mmm(123)$ | —             | —                  | —     | —     | —              | 9.74  | 6.89  | 45.0            | —              | 1.260             | 1.275             | —    | —    | —    |
| RuSe <sub>2</sub> | HPX                       | —             | $P4/mmm(123)$ | —             | —                  | —     | —     | —              | 6.40  | 9.05  | 45.0            | —              | 0.053             | 1.564             | —    | —    | 0.0  |
| RuTi <sub>2</sub> | HXX                       | —             | $P4/mmm(123)$ | —             | —                  | —     | —     | —              | 5.93  | 8.40  | 44.6            | —              | 0.919             | 1.873             | —    | —    | 0.0  |
| RuMn <sub>2</sub> | HXX                       | —             | $P4/mmm(123)$ | —             | —                  | —     | —     | —              | 8.41  | 5.93  | 44.4            | —              | 2.015             | 11.563            | —    | —    | —    |
| RuY <sub>2</sub>  | HPX                       | —             | $P4/mmm(123)$ | —             | —                  | —     | —     | —              | 6.79  | 9.60  | 45.0            | —              | 0.414             | 1.389             | —    | —    | 0.0  |
| RhLi <sub>2</sub> | PTH                       | $P4/mmm(123)$ | $P4/mmm(123)$ | $C2/m(12)$    | 5.54               | 7.85  | 45.2  | 45.1           | 8.98  | 7.56  | 50.4            | 0.133          | 0.149             | 0.0               | 0.0  | 0.0  |      |
| RhAu <sub>2</sub> | HXX                       | —             | $P4/mmm(123)$ | —             | —                  | —     | —     | —              | 7.96  | 5.61  | 44.3            | —              | 5.785             | 5.794             | —    | —    | 0.0  |
| RhHg <sub>2</sub> | TXX                       | $P4/mmm(123)$ | —             | —             | 6.61               | 9.22  | 43.2  | 43.2           | —     | —     | —               | —              | 1.278             | 6.618             | 0.0  | —    | —    |
| PdAg <sub>2</sub> | HXX                       | —             | $P4/mmm(123)$ | —             | —                  | —     | —     | —              | 5.83  | 8.37  | 43.3            | —              | 6.189             | 6.315             | —    | —    | —    |
| AgSe <sub>2</sub> | TPH                       | $C2/m(12)$    | $P4/mmm(123)$ | $C2/m(12)$    | 9.29               | 6.62  | 57.6  | 45.0           | 9.30  | 6.64  | 57.5            | 0.003          | 0.219             | 0.0               | 0.0  | 0.0  |      |
| CdK <sub>2</sub>  | HXX                       | —             | $P4/mmm(123)$ | —             | —                  | —     | —     | —              | 8.43  | 11.95 | 44.6            | —              | 1.278             | 2.679             | —    | —    | —    |
| CdY <sub>2</sub>  | PHT                       | $C2/m(12)$    | $P4/mmm(123)$ | $C2/m(12)$    | 9.02               | 9.89  | 46.7  | 45.0           | 10.05 | 7.29  | 56.9            | 0.040          | 0.730             | 0.0               | 0.0  | 1.5  |      |
| InLi <sub>2</sub> | HTX                       | $P4/mmm(123)$ | $P4/mmm(123)$ | —             | 6.32               | 9.04  | 45.6  | 45.0           | —     | —     | —               | —              | 0.051             | 4.573             | 0.0  | —    | —    |
| InCa <sub>2</sub> | TXX                       | $P4/mmm(123)$ | —             | —             | 7.57               | 10.75 | 44.6  | —              | —     | —     | —               | —              | 1.123             | 6.594             | 0.0  | —    | —    |
| InSe <sub>2</sub> | HXX                       | —             | $P4/mmm(123)$ | —             | —                  | —     | —     | —              | 6.65  | 9.46  | 45.0            | —              | 3.680             | 6.339             | —    | —    | —    |
| InCr <sub>2</sub> | HXX                       | —             | $P4/mmm(123)$ | —             | —                  | —     | —     | —              | 6.11  | 8.63  | 45.1            | —              | 1.595             | 2.770             | —    | —    | 35.6 |
| InY <sub>2</sub>  | HXX                       | —             | $P4/mmm(123)$ | —             | —                  | —     | —     | —              | 6.81  | 9.62  | 45.1            | —              | 2.618             | 3.690             | —    | —    | —    |
| InBa <sub>2</sub> | HXX                       | —             | $P4/mmm(123)$ | —             | —                  | —     | —     | —              | 8.51  | 12.04 | 45.1            | —              | 2.067             | 2.487             | —    | —    | —    |
| SnCa <sub>2</sub> | TPH                       | $P3m1(164)$   | $P4/mmm(123)$ | $P3m1(164)$   | 10.12              | 10.12 | 60.0  | 44.8           | 10.11 | 10.11 | 60.0            | 0.018          | 0.590             | 0.0               | 0.0  | 0.0  |      |
| CsBr <sub>2</sub> | TXX                       | $P4/mmm(123)$ | —             | —             | 9.84               | 13.95 | 45.2  | —              | —     | —     | —               | 0.919          | 1.134             | 4.0               | —    | —    |      |
| CsI <sub>2</sub>  | PTH                       | $P4/mmm(123)$ | —             | —             | 10.42              | 14.74 | 44.9  | —              | —     | —     | —               | 0.796          | 1.746             | 4.0               | —    | —    |      |

(Continued on next page)

Table 3: List of  $P4mmm(123)$ 

| species           | Initial structure indices | space group   |               |               | lattice parameters |       |                |       |       |                | relative energy   |                   |                                   | spin moment |      |     |     |
|-------------------|---------------------------|---------------|---------------|---------------|--------------------|-------|----------------|-------|-------|----------------|-------------------|-------------------|-----------------------------------|-------------|------|-----|-----|
|                   |                           | T             | H             | P             | T                  |       |                | H     |       |                | $\Delta E_1$ [eV] | $\Delta E_2$ [eV] | spin moment [ $\mu_B$ /unit cell] |             |      |     |     |
|                   |                           |               |               |               | a [Å]              | b [Å] | $\gamma$ [deg] | a [Å] | b [Å] | $\gamma$ [deg] |                   |                   | T                                 | H           | P    |     |     |
| BaSe <sub>2</sub> | PHX                       | -             | $P6m2(187)$   | $P4/mmm(123)$ | -                  | 10.15 | 10.14          | 60.1  | 9.65  | 9.65           | 53.2              | 0.814             | 8.564                             | -           | 0.0  | 0.0 | 0.0 |
| BaSe <sub>2</sub> | PTX                       | $P4/mmm(123)$ | -             | $P4/mmm(123)$ | 8.90               | 12.61 | 45.0           | 8.91  | 12.62 | 45.0           | 0.022             | 0.868             | 0.0                               | -           | -    | 0.0 | 0.0 |
| BaTe <sub>2</sub> | TPX                       | $P4/mmm(123)$ | -             | $P4/mmm(123)$ | 9.43               | 13.37 | 44.8           | 9.43  | 13.37 | 44.8           | 0.004             | 1.146             | 0.0                               | -           | -    | 0.0 | 0.0 |
| HfBe <sub>2</sub> | PHX                       | -             | $P4/mmm(123)$ | $Cmm2(35)$    | -                  | -     | -              | 6.93  | 7.58  | 46.5           | 0.718             | 3.790             | -                                 | 0.0         | 0.0  | -   | -   |
| HfCa <sub>2</sub> | THX                       | $P4/mmm(123)$ | $P4/mmm(123)$ | -             | 9.97               | 7.05  | 45.0           | 8.00  | 5.79  | 43.7           | -                 | 0.011             | 13.950                            | 0.0         | 0.0  | -   | -   |
| HfY <sub>2</sub>  | THX                       | $P4/mmm(123)$ | $P4/mmm(123)$ | -             | 10.14              | 7.15  | 44.6           | 9.39  | 6.75  | 45.8           | -                 | 0.502             | 5.011                             | 0.0         | 2.5  | -   | -   |
| HfTi <sub>2</sub> | THX                       | $P4/mmm(123)$ | $P4/mmm(123)$ | -             | 9.49               | 6.71  | 44.9           | 6.72  | 9.51  | 44.9           | -                 | 0.018             | 9.804                             | 0.0         | 0.0  | -   | -   |
| TaBe <sub>2</sub> | $Pmm2(25)$                | -             | $P4/mmm(123)$ | $P4/mmm(123)$ | 8.54               | 9.17  | 21.4           | 5.47  | 7.80  | 44.5           | -                 | 0.199             | 5.207                             | 0.0         | 0.0  | -   | -   |
| TaY <sub>2</sub>  | HXX                       | -             | $P4/mmm(123)$ | -             | 6.98               | 9.88  | -              | 6.98  | 9.88  | 44.9           | -                 | 0.849             | 4.248                             | -           | 0.0  | -   | -   |
| ReSe <sub>2</sub> | PHT                       | $P4/mmm(123)$ | $P4/mmm(123)$ | $P4/mmm(123)$ | 6.49               | 9.16  | 45.0           | 6.48  | 9.17  | 45.0           | -                 | 0.001             | 0.001                             | 0.0         | 0.0  | 0.0 | 0.0 |
| ReTi <sub>2</sub> | HXX                       | -             | $P4/mmm(123)$ | -             | 6.12               | 8.66  | 45.0           | 6.12  | 8.66  | 45.0           | -                 | 2.452             | 3.638                             | -           | 0.0  | -   | -   |
| OsBe <sub>2</sub> | HXX                       | -             | $P4/mmm(123)$ | -             | 5.72               | 8.07  | 44.9           | 5.72  | 8.07  | 44.9           | -                 | 2.085             | 7.582                             | -           | 0.0  | -   | -   |
| OsS <sub>2</sub>  | HXX                       | -             | $P4/mmm(123)$ | -             | 9.06               | 6.40  | 45.0           | 9.06  | 6.40  | 45.0           | -                 | 1.942             | 5.550                             | -           | 0.0  | -   | -   |
| OsTi <sub>2</sub> | HPX                       | -             | $P4/mmm(123)$ | $P4/mmm(123)$ | -                  | 5.96  | 8.44           | 44.7  | 5.96  | 8.44           | 44.7              | 6.66              | 5.97                              | 63.4        | -    | 0.0 | 0.0 |
| OsMn <sub>2</sub> | HXX                       | -             | $P4/mmm(123)$ | -             | 8.30               | 5.87  | 45.0           | 8.30  | 5.87  | 45.0           | -                 | 1.335             | 12.451                            | -           | 32.3 | -   | -   |
| IrBe <sub>2</sub> | HXX                       | -             | $P4/mmm(123)$ | -             | 5.65               | 8.00  | 45.0           | 5.65  | 8.00  | 45.0           | -                 | 3.811             | 6.232                             | -           | 0.0  | -   | -   |
| IrMg <sub>2</sub> | HXX                       | -             | $P4/mmm(123)$ | -             | 9.00               | 6.35  | 44.8           | 9.00  | 6.35  | 44.8           | -                 | 3.230             | 10.834                            | -           | 0.0  | -   | -   |
| IrCo <sub>2</sub> | PHX                       | -             | $P4/mmm(123)$ | $P2_1/m(11)$  | -                  | 6.95  | 9.83           | 45.0  | 6.95  | 9.83           | 45.0              | 8.85              | 7.32                              | 52.8        | -    | 0.0 | 0.0 |
| IrSr <sub>2</sub> | HXX                       | $P3m1(164)$   | $P4/mmm(123)$ | -             | 8.93               | 8.95  | 59.5           | 7.46  | 10.57 | 44.9           | -                 | 0.362             | 1.981                             | 0.0         | 0.0  | -   | -   |
| IrZr <sub>2</sub> | HXX                       | $P3m1(164)$   | $P4/mmm(123)$ | -             | 8.28               | 8.25  | 60.0           | 8.47  | 5.99  | 45.0           | -                 | 0.648             | 0.649                             | 0.0         | 0.0  | -   | -   |
| AuSn <sub>2</sub> | HXX                       | -             | $P4/mmm(123)$ | -             | -                  | -     | -              | 6.49  | 8.83  | 42.3           | -                 | 2.861             | 2.870                             | -           | 0.0  | -   | -   |
| AuPb <sub>2</sub> | HXX                       | -             | $P4/mmm(123)$ | -             | -                  | -     | -              | 7.20  | 10.40 | 43.9           | -                 | 0.933             | 0.981                             | -           | 0.0  | -   | -   |
| HgLi <sub>2</sub> | HXX                       | -             | $P4/mmm(123)$ | -             | -                  | -     | -              | 6.66  | 9.44  | 44.7           | -                 | 1.596             | 3.332                             | -           | 0.0  | -   | -   |
| TiCa <sub>2</sub> | HPX                       | -             | $P4/mmm(123)$ | $C2/m(12)$    | -                  | 7.66  | 10.85          | 45.0  | 7.66  | 10.85          | 45.0              | 9.88              | 8.16                              | 51.4        | -    | 0.0 | 0.0 |
| TlBa <sub>2</sub> | HPX                       | -             | $P4/mmm(123)$ | $P2_1/m(11)$  | -                  | 8.60  | 12.17          | 45.0  | 8.60  | 12.17          | 45.0              | 0.492             | 1.832                             | -           | 0.0  | 0.0 | 0.0 |

Table 4: List of  $C2/m(12)$ 

| species           | Initial structure indices | space group   |                   |            | lattice parameters |       |       |                |       |       | relative energy |                | spin moment       |                   |      |      |   |
|-------------------|---------------------------|---------------|-------------------|------------|--------------------|-------|-------|----------------|-------|-------|-----------------|----------------|-------------------|-------------------|------|------|---|
|                   |                           | T             | H                 | P          | a [Å]              | b [Å] | c [Å] | $\gamma$ [deg] | a [Å] | b [Å] | c [Å]           | $\gamma$ [deg] | $\Delta E_1$ [eV] | $\Delta E_2$ [eV] | T    | H    | P |
|                   |                           | $C2/m(12)$    | $Amm2(38)$        | $C2/m(12)$ | 6.15               | 6.61  | 56.9  | 39.3           | 6.60  | 6.17  | 57.5            | 0.152          | 3.972             | 0.0               | 0.0  | 0.0  |   |
| LiMg <sub>2</sub> | THX                       | $C2/m(12)$    | $Amm2(38)$        | —          | 7.49               | 7.49  | 39.3  | 7.47           | 7.46  | 39.7  | —               | 0.581          | 4.407             | 0.0               | 0.0  | —    |   |
| BeSe <sub>2</sub> | PXX                       | $C2/m(12)$    | $Amm2(38)$        | —          | —                  | —     | —     | —              | —     | —     | —               | 2.049          | 3.159             | —                 | —    | 0.0  |   |
| BeRu <sub>2</sub> | TXX                       | $C2/m(12)$    | —                 | —          | 8.70               | 7.49  | 30.6  | —              | —     | —     | —               | 1.128          | 9.799             | 0.0               | —    | —    |   |
| BeRh <sub>2</sub> | THX                       | $C2/m(12)$    | $P\bar{6}m2(187)$ | —          | 6.32               | 5.43  | 49.5  | 5.32           | 5.32  | 59.8  | —               | 0.239          | 1.681             | 0.0               | 0.0  | —    |   |
| BeIn <sub>2</sub> | HTX                       | $C2/m(12)$    | $P1(1)$           | —          | 6.90               | 7.89  | 50.3  | 6.92           | 5.95  | 61.2  | —               | 0.494          | 6.038             | 0.0               | 0.0  | —    |   |
| BeRe <sub>2</sub> | TXX                       | $C2/m(12)$    | —                 | —          | 6.98               | 6.98  | 41.2  | —              | —     | —     | —               | 1.327          | 3.902             | 0.0               | —    | —    |   |
| BBe <sub>2</sub>  | TXX                       | $C2/m(12)$    | —                 | —          | 4.04               | 5.97  | 59.4  | —              | —     | —     | —               | 1.451          | 1.965             | 0.0               | —    | —    |   |
| BB <sub>2</sub>   | THX                       | $C2/m(12)$    | $Amm2(38)$        | —          | 5.12               | 5.68  | 33.6  | 5.37           | 4.94  | 35.3  | —               | 0.713          | 1.914             | 0.0               | 0.0  | —    |   |
| BAl <sub>2</sub>  | HTX                       | $C2/m(12)$    | $Amm2(38)$        | —          | 6.48               | 6.65  | 59.2  | 6.66           | 6.34  | 45.2  | —               | 0.492          | 2.832             | 0.0               | 0.0  | —    |   |
| BP <sub>2</sub>   | TXX                       | $C2/m(12)$    | —                 | —          | 7.19               | 7.19  | 52.4  | —              | —     | —     | —               | 3.719          | 4.235             | 0.0               | —    | —    |   |
| NBe <sub>2</sub>  | TPX                       | $C2/m(12)$    | —                 | —          | 4.94               | 4.95  | 64.7  | —              | —     | —     | —               | 0.427          | 2.340             | 0.0               | —    | 0.0  |   |
| OCs <sub>2</sub>  | PXX                       | $C2/m(12)$    | —                 | —          | 9.81               | 9.81  | 50.4  | —              | —     | —     | —               | 0.733          | 1.339             | 0.0               | —    | 0.0  |   |
| FRb <sub>2</sub>  | PXX                       | $P3m1(164)$   | —                 | —          | 8.94               | 8.93  | 55.9  | 10.25          | 10.22 | 46.2  | —               | 0.007          | 0.138             | 0.0               | 0.0  | —    |   |
| NaCl <sub>2</sub> | PXX                       | $C2/m(12)$    | —                 | —          | 8.40               | 10.16 | 51.8  | —              | —     | —     | —               | 0.731          | 0.955             | 4.0               | —    | 2.0  |   |
| MgRh <sub>2</sub> | THX                       | $C2/m(12)$    | $Amm2(38)$        | —          | 9.63               | 9.64  | 33.2  | 9.07           | 9.07  | 33.3  | —               | 0.102          | 1.958             | 3.6               | 0.0  | —    |   |
| MgBa <sub>2</sub> | PXX                       | $C2/m(12)$    | $Amm2(38)$        | —          | 11.05              | 8.90  | 51.5  | 8.84           | 8.86  | 59.6  | —               | 0.101          | 0.322             | 0.0               | 0.0  | 0.0  |   |
| AlBe <sub>2</sub> | TXX                       | $C2/m(12)$    | —                 | —          | 6.08               | 6.96  | 42.4  | —              | —     | —     | —               | 2.495          | 3.435             | 0.0               | —    | —    |   |
| AlF <sub>2</sub>  | HTX                       | $C2/m(12)$    | $P1(1)$           | —          | 6.76               | 5.18  | 59.3  | 6.79           | 5.75  | 65.4  | —               | 0.168          | 2.742             | 0.0               | 0.0  | —    |   |
| AlK <sub>2</sub>  | HTX                       | $C2/m(12)$    | $Pnma(51)$        | —          | 11.42              | 10.98 | 43.8  | 9.37           | 9.78  | 61.1  | —               | 0.706          | 6.459             | 0.0               | 0.0  | —    |   |
| AlGe <sub>2</sub> | HTX                       | $C2/m(12)$    | $Pc(7)$           | —          | 8.95               | 8.97  | 36.6  | 8.00           | 8.07  | 46.4  | —               | 0.389          | 5.203             | 0.0               | 0.0  | —    |   |
| AlSe <sub>2</sub> | TXX                       | $C2/m(12)$    | —                 | —          | 7.29               | 7.29  | 49.9  | —              | —     | —     | —               | 2.444          | 2.936             | 0.0               | —    | —    |   |
| AlRb <sub>2</sub> | THX                       | $C2/m(12)$    | $Cmmm(65)$        | —          | 11.40              | 11.84 | 44.1  | 10.18          | 13.18 | 40.0  | —               | 0.424          | 5.631             | 0.0               | 0.0  | —    |   |
| AlRu <sub>2</sub> | HXX                       | $C2/m(12)$    | $C2/m(12)$        | —          | —                  | —     | —     | 7.72           | 6.69  | 43.7  | —               | 7.612          | 8.751             | —                 | —    | —    |   |
| AlRh <sub>2</sub> | PHX                       | —             | $P4/mmm(123)$     | —          | 8.03               | 6.92  | 43.7  | 5.85           | 8.32  | 46.1  | —               | 0.701          | 2.688             | 0.0               | 0.0  | —    |   |
| AlPd <sub>2</sub> | THX                       | $C2/m(12)$    | $P\bar{6}m2(187)$ | —          | 6.96               | 5.63  | 53.2  | 5.88           | 5.88  | 59.9  | —               | 0.287          | 1.642             | 0.0               | 0.0  | —    |   |
| AlAg <sub>2</sub> | THX                       | $C2/m(12)$    | $P4/mmm(123)$     | —          | 7.19               | 8.24  | 43.0  | 5.82           | 8.36  | 44.1  | —               | 0.366          | 3.429             | 0.0               | 0.0  | —    |   |
| AlB <sub>2</sub>  | HPX                       | —             | $P4/mmm(123)$     | —          | —                  | —     | —     | 11.80          | 8.34  | 45.0  | —               | 0.688          | 2.324             | —                 | —    | —    |   |
| AlHf <sub>2</sub> | TXX                       | $C2/m(12)$    | —                 | —          | 7.70               | 7.69  | 45.9  | —              | —     | —     | —               | 2.870          | 4.085             | 0.0               | —    | —    |   |
| AlIr <sub>2</sub> | HXX                       | —             | $C2/m(12)$        | —          | —                  | —     | —     | 7.81           | 6.82  | 42.6  | —               | 1.127          | 6.685             | —                 | —    | —    |   |
| AlAu <sub>2</sub> | THX                       | $C2/m(12)$    | $P4/mmm(123)$     | —          | 8.03               | 6.92  | 43.7  | 5.85           | 8.32  | 46.1  | —               | 0.701          | 2.688             | 0.0               | 0.0  | —    |   |
| SiN <sub>2</sub>  | TPX                       | $C2/m(12)$    | —                 | —          | 9.31               | 9.86  | 43.7  | —              | —     | —     | —               | 0.679          | 1.723             | 0.0               | —    | —    |   |
| SiZr <sub>2</sub> | HPT                       | $C2/m(12)$    | $Cmmm(65)$        | —          | 7.94               | 8.03  | 59.0  | 5.96           | 7.48  | 51.1  | —               | 0.030          | 0.736             | 0.0               | 0.0  | —    |   |
| SiPt <sub>2</sub> | THX                       | $C2/m(12)$    | $P\bar{6}m2(187)$ | —          | 6.46               | 6.49  | 52.7  | 5.96           | 6.44  | 57.4  | —               | 0.390          | 1.688             | 0.0               | 0.0  | —    |   |
| SiPb <sub>2</sub> | HPT                       | $P3m1(164)$   | —                 | —          | 8.80               | 8.80  | 58.1  | 8.38           | 8.38  | 57.9  | —               | 0.653          | 0.740             | 0.0               | 0.0  | —    |   |
| PNLi <sub>2</sub> | TXX                       | $C2/m(12)$    | —                 | —          | 8.24               | 8.01  | 42.9  | —              | —     | —     | —               | 1.238          | 3.853             | 0.0               | —    | —    |   |
| PNa <sub>2</sub>  | TXX                       | $C2/m(12)$    | —                 | —          | 9.39               | 9.01  | 43.0  | —              | —     | —     | —               | 0.865          | 2.517             | 0.0               | —    | —    |   |
| PCa <sub>2</sub>  | TPX                       | $P3m1(164)$   | —                 | —          | 8.42               | 8.42  | 59.9  | —              | —     | —     | —               | 0.082          | 1.612             | 0.0               | —    | —    |   |
| PCd <sub>2</sub>  | HPX                       | —             | $Aem2(39)$        | —          | —                  | —     | —     | 7.24           | 7.25  | 63.0  | —               | 0.400          | 1.789             | 0.0               | 0.0  | —    |   |
| KSe <sub>2</sub>  | PXX                       | $C2/m(12)$    | —                 | —          | 12.40              | 12.43 | 41.7  | —              | —     | —     | —               | 0.111          | 1.459             | —                 | —    | —    |   |
| CaSi <sub>2</sub> | TPX                       | $C2/m(12)$    | —                 | —          | 11.52              | 11.52 | 39.0  | —              | —     | —     | —               | 0.400          | 1.789             | 0.0               | 0.0  | —    |   |
| CaGe <sub>2</sub> | TPX                       | $C2/m(12)$    | $Pnmm(59)$        | —          | 11.48              | 11.48 | 40.7  | —              | —     | —     | —               | 0.030          | 0.736             | 0.0               | 0.0  | —    |   |
| CaSn <sub>2</sub> | PXX                       | $C2/m(12)$    | $Pnmm(59)$        | —          | 11.94              | 11.94 | 44.0  | —              | —     | —     | —               | 0.007          | 4.591             | 0.0               | 0.0  | —    |   |
| CaTe <sub>2</sub> | THX                       | $C2/m(12)$    | $P\bar{6}m2(187)$ | —          | 11.55              | 9.01  | 49.8  | 9.86           | 9.90  | 59.2  | —               | 0.053          | 4.749             | 0.0               | 0.0  | —    |   |
| CaHg <sub>2</sub> | HPT                       | $C2/m(12)$    | $Amm2(38)$        | —          | 11.48              | 11.50 | 37.9  | 10.67          | 10.75 | 41.0  | —               | 0.410          | 2.140             | 0.0               | 0.0  | —    |   |
| ScN <sub>2</sub>  | PXX                       | —             | —                 | —          | —                  | —     | —     | —              | —     | —     | —               | 0.088          | 0.094             | 0.0               | 0.0  | —    |   |
| ScO <sub>2</sub>  | PXX                       | —             | —                 | —          | —                  | —     | —     | —              | —     | —     | —               | 1.883          | 14.128            | —                 | —    | —    |   |
| ScCl <sub>2</sub> | HTX                       | $C2/m(12)$    | $P\bar{6}m2(187)$ | —          | 7.28               | 7.28  | 59.7  | 7.11           | 7.11  | 59.9  | —               | 0.085          | 2.970             | 0.7               | 3.7  | —    |   |
| ScAu <sub>2</sub> | HTX                       | $C2/m(12)$    | $P4/mmm(123)$     | —          | 8.12               | 6.79  | 51.1  | 6.47           | 9.14  | 44.9  | —               | 0.019          | 4.427             | 0.0               | 0.0  | —    |   |
| TiBi <sub>2</sub> | PXX                       | $P\bar{1}(2)$ | —                 | —          | 7.59               | 8.85  | 39.9  | —              | —     | —     | —               | 0.501          | 2.761             | 0.0               | —    | —    |   |
| VAs <sub>2</sub>  | HTX                       | $C2/m(12)$    | $P\bar{6}m2(187)$ | —          | 8.60               | 8.63  | 42.2  | 7.50           | 7.48  | 59.8  | —               | 0.205          | 1.563             | 5.1               | 4.0  | —    |   |
| VSr <sub>2</sub>  | TXX                       | $C2/m(12)$    | —                 | —          | 7.76               | 10.28 | 48.5  | —              | —     | —     | —               | 2.329          | 2.557             | 1.4               | —    | —    |   |
| VSb <sub>2</sub>  | PXX                       | $C2/m(12)$    | $Amm2(38)$        | —          | 9.16               | 9.17  | 43.4  | 8.88           | 8.90  | 43.6  | —               | 0.058          | 0.300             | 8.3               | 10.3 | 8.4  |   |
| VPb <sub>2</sub>  | PHX                       | —             | $P4/mmm(123)$     | —          | —                  | —     | —     | 6.92           | 9.80  | 44.9  | —               | 0.758          | 4.917             | —                 | —    | —    |   |
| VBi <sub>2</sub>  | PXX                       | $C2/m(12)$    | $Amm2(38)$        | —          | 9.46               | 9.46  | 42.2  | 9.12           | 9.13  | 44.1  | —               | 0.004          | 0.007             | 9.9               | 10.4 | 10.0 |   |
| CrBr <sub>2</sub> | THX                       | $C2/m(12)$    | $Cmmm(65)$        | —          | 8.07               | 8.07  | 53.5  | 8.02           | 8.02  | 53.5  | —               | 0.554          | 2.069             | 16.0              | 6.0  | —    |   |
| CrY <sub>2</sub>  | HTP                       | $C2/m(12)$    | $P4/mmm(123)$     | —          | 8.81               | 6.98  | 53.0  | 6.86           | 9.72  | 44.9  | —               | 0.498          | 0.712             | 7.6               | 16.1 | 7.8  |   |

(Continued on next page)

Table 4: List of  $C2/m(12)$ 

| species           | Initial structure indices | space group       |                   |   | lattice parameters |       |         |       |       |         | relative energy   |                   |       | spin moment |      |  |
|-------------------|---------------------------|-------------------|-------------------|---|--------------------|-------|---------|-------|-------|---------|-------------------|-------------------|-------|-------------|------|--|
|                   |                           | T                 | H                 | P | a [Å]              | b [Å] | c [deg] | a [Å] | b [Å] | c [deg] | $\Delta E_1$ [eV] | $\Delta E_2$ [eV] | T     | H           | P    |  |
|                   |                           |                   |                   |   |                    |       |         |       |       |         |                   |                   |       |             |      |  |
| CrRu <sub>2</sub> | HXX                       | -                 | -                 | - | 8.68               | 8.68  | 53.8    | 6.88  | 7.84  | 41.6    | 1.187             | 5.058             | 16.0  | 16.0        | -    |  |
| CrI <sub>2</sub>  | HTX                       | $C2/m(12)$        | $C2/m(12)$        | - | 9.44               | 8.68  | 42.1    | 9.27  | 8.57  | 54.6    | 0.001             | 3.470             | 14.2  | 14.6        | 14.2 |  |
| CrBi <sub>2</sub> | HPT                       | $C2/m(12)$        | $C2/m(12)$        | - | 8.01               | 9.44  | 42.7    | 7.33  | 9.30  | 42.3    | 0.055             | 0.058             | 10.0  | 12.0        | 0.0  |  |
| MnP <sub>2</sub>  | PHT                       | $C2/m(12)$        | $C2/m(12)$        | - | 5.59               | 8.01  | 36.8    | 7.33  | 7.36  | 58.7    | 4.107             | 4.694             | 0.0   | 0.0         | 0.0  |  |
| FeB <sub>2</sub>  | TXH                       | -                 | -                 | - | 7.74               | 7.75  | 42.3    | 7.31  | 7.34  | 50.7    | 0.161             | 0.538             | 6.3   | 8.1         | 1.9  |  |
| FeP <sub>2</sub>  | PTH                       | $P\bar{1}(2)$     | $P\bar{1}(2)$     | - | 8.04               | 8.10  | 43.2    | 7.62  | 7.64  | 50.7    | 0.444             | 7.230             | 7.7   | 9.2         | -    |  |
| FeAs <sub>2</sub> | THX                       | $C2/m(12)$        | $C2/m(12)$        | - | 6.60               | 6.60  | 59.7    | 6.60  | 6.58  | 59.7    | 3.152             | 0.674             | 3.9   | 8.0         | 2.0  |  |
| FeSe <sub>2</sub> | PTH                       | $C2/m(12)$        | $C2/m(12)$        | - | 5.89               | 5.61  | 44.4    | -     | -     | -       | 2.261             | 7.289             | -     | -           | 0.0  |  |
| FeTe <sub>2</sub> | PXX                       | -                 | -                 | - | 6.43               | 7.81  | 51.7    | -     | -     | -       | 0.000             | 2.055             | 0.0   | 0.0         | 0.0  |  |
| CoC <sub>2</sub>  | TXH                       | $C2/m(12)$        | $C2/m(12)$        | - | 8.38               | 8.39  | 35.6    | 8.23  | 8.24  | 35.8    | 0.363             | 0.833             | 5.0   | 6.3         | -    |  |
| CoHf <sub>2</sub> | TPX                       | $C2/m(12)$        | $C2/m(12)$        | - | 7.54               | 7.82  | 40.9    | 7.62  | 7.67  | 40.8    | 0.405             | 0.553             | 0.0   | 0.0         | 0.0  |  |
| CoIr <sub>2</sub> | HTX                       | $P\bar{1}(2)$     | $Pc(7)$           | - | 8.09               | 7.79  | 43.3    | 7.94  | 7.94  | 41.8    | 0.030             | 2.912             | 0.0   | 0.0         | 0.0  |  |
| NiP <sub>2</sub>  | HPT                       | $C2/m(12)$        | $C2/m(12)$        | - | 6.43               | 8.31  | 54.4    | -     | -     | -       | 0.023             | 1.233             | 0.0   | 0.0         | 0.0  |  |
| NiAs <sub>2</sub> | HTX                       | $C2/m(12)$        | $C2/m(12)$        | - | 8.49               | 8.49  | 34.7    | 8.41  | 8.44  | 34.6    | 8.69              | 0.300             | 0.0   | 0.0         | 2.6  |  |
| NiHf <sub>2</sub> | PTH                       | $C2/m(12)$        | $C2/m(12)$        | - | -                  | -     | -       | -     | -     | -       | 6.10              | 3.154             | 3.531 | -           | 0.0  |  |
| NiRu <sub>2</sub> | HPT                       | $C2/m(12)$        | $C2/m(12)$        | - | 8.55               | 8.54  | 40.6    | 7.03  | 9.96  | 44.9    | 0.142             | 2.547             | -     | 0.0         | 0.0  |  |
| GaY <sub>2</sub>  | PHX                       | -                 | $P4/mmm(123)$     | - | 7.43               | 7.77  | 57.0    | 6.71  | 6.66  | 72.0    | 8.60              | 0.242             | 0.782 | 0.0         | 0.0  |  |
| AsPd <sub>2</sub> | HTP                       | $C2/m(12)$        | $Pmm2_1(31)$      | - | 12.31              | 12.31 | 37.3    | -     | -     | -       | 12.47             | 12.48             | 0.0   | 0.0         | 0.0  |  |
| BrLi <sub>2</sub> | TPH                       | $C2/m(12)$        | $Pc(7)$           | - | 11.14              | 11.14 | 37.4    | -     | -     | -       | 11.31             | 11.31             | 0.0   | 0.0         | 0.0  |  |
| SrSi <sub>2</sub> | TPX                       | $C2/m(12)$        | -                 | - | 12.13              | 12.13 | 39.3    | -     | -     | -       | 12.45             | 12.45             | 0.0   | 0.0         | 0.0  |  |
| SrP <sub>2</sub>  | TPX                       | $C2/m(12)$        | $C2/m(12)$        | - | 12.68              | 12.68 | 42.2    | 12.52 | 11.36 | 24.8    | 3.379             | 4.365             | 0.0   | 0.0         | 0.0  |  |
| SrGe <sub>2</sub> | TPX                       | $C2/m(12)$        | $C2/m(12)$        | - | 12.83              | 12.83 | 43.5    | -     | -     | -       | 0.389             | 4.638             | 0.0   | 0.0         | 0.0  |  |
| SrIn <sub>2</sub> | HXX                       | -                 | $C2/m(12)$        | - | 10.75              | 10.75 | 42.9    | -     | -     | -       | 3.184             | 3.324             | -     | 0.0         | 0.0  |  |
| SrSb <sub>2</sub> | TPX                       | $C2/m(12)$        | $C2/m(12)$        | - | 7.91               | 7.90  | 58.4    | 7.77  | 7.77  | 59.6    | 10.61             | 0.387             | 4.699 | 0.0         | 0.0  |  |
| SrPb <sub>2</sub> | TPX                       | $P\bar{3}m1(164)$ | $P\bar{3}m1(164)$ | - | 8.39               | 8.39  | 58.9    | 8.25  | 8.25  | 59.6    | 8.33              | 0.339             | 0.601 | 0.0         | 0.0  |  |
| YO <sub>2</sub>   | PXX                       | -                 | $C2/m(12)$        | - | 6.21               | 6.18  | 60.2    | 6.01  | 5.96  | 60.4    | 9.25              | 0.404             | 3.838 | 0.0         | 0.0  |  |
| YS <sub>2</sub>   | PXX                       | -                 | $C2/m(12)$        | - | 6.96               | 6.96  | 59.9    | 6.95  | 6.94  | 60.0    | 6.49              | 0.916             | 0.927 | -           | 0.0  |  |
| YG <sub>2</sub>   | TPX                       | $C2/m(12)$        | $C2/m(12)$        | - | 7.07               | 7.08  | 54.3    | -     | -     | -       | 0.651             | 1.777             | 0.0   | 0.0         | 0.0  |  |
| YB <sub>2</sub>   | HPT                       | $P\bar{3}m1(164)$ | $P\bar{6}m2(187)$ | - | 8.81               | 8.81  | 49.2    | 8.21  | 8.21  | 52.9    | 6.13              | 0.379             | 0.410 | 0.0         | 0.0  |  |
| YI <sub>2</sub>   | HPT                       | $P\bar{3}m1(164)$ | $P\bar{6}m2(187)$ | - | 9.19               | 9.19  | 42.4    | 8.32  | 8.31  | 54.8    | 6.35              | 0.171             | 0.417 | 0.0         | 0.0  |  |
| ZrHf <sub>2</sub> | HPX                       | -                 | $C2/m(12)$        | - | 8.92               | 8.92  | 50.9    | 7.84  | 7.94  | 59.2    | 8.09              | 0.312             | 4.848 | 0.0         | 0.0  |  |
| ZrPb <sub>2</sub> | PXX                       | -                 | $C2/m(12)$        | - | 9.33               | 9.33  | 51.8    | 8.96  | 8.97  | 54.0    | 0.198             | 0.176             | 16.0  | 16.0        | 16.0 |  |
| NbO <sub>2</sub>  | THX                       | $C2/m(12)$        | $P\bar{6}m2(187)$ | - | 8.15               | 8.89  | 35.1    | 7.50  | 9.08  | 38.3    | 0.638             | 7.676             | 0.0   | 0.0         | -    |  |
| NbS <sub>2</sub>  | HPT                       | $P\bar{3}m1(164)$ | $P\bar{6}m2(187)$ | - | 6.94               | 6.60  | 58.3    | -     | -     | -       | 0.269             | 2.477             | 15.9  | 16.0        | -    |  |
| NbSe <sub>2</sub> | HPX                       | $P\bar{3}m1(164)$ | $P\bar{6}m2(187)$ | - | 7.53               | 8.24  | 34.8    | 6.46  | 7.59  | 46.1    | 0.278             | 0.964             | 0.0   | 0.0         | -    |  |
| NbB <sub>2</sub>  | TPX                       | $C2/m(12)$        | $C2/m(12)$        | - | 8.15               | 8.15  | 42.9    | 7.56  | 7.56  | 45.0    | 0.488             | 0.844             | 0.0   | 0.0         | 0.0  |  |
| MoCl <sub>2</sub> | PTH                       | $C2/m(12)$        | $C2/m(12)$        | - | 8.15               | 8.15  | 42.9    | 7.56  | 7.56  | 45.0    | 3.319             | 7.440             | 0.0   | 0.0         | 0.0  |  |
| MoBr <sub>2</sub> | THX                       | $C2/m(12)$        | $C2/m(12)$        | - | 6.94               | 6.60  | 58.3    | -     | -     | -       | 4.418             | 5.983             | 0.0   | 0.0         | -    |  |
| MoSb <sub>2</sub> | HTX                       | $C2/m(12)$        | $P\bar{6}m2(187)$ | - | 7.53               | 8.24  | 34.8    | 6.46  | 7.59  | 46.1    | 4.664             | 5.141             | 0.0   | 0.0         | 0.0  |  |
| Mol <sub>2</sub>  | THX                       | $C2/m(12)$        | $C2/m(12)$        | - | 8.15               | 8.15  | 42.9    | 7.56  | 7.56  | 45.0    | 0.210             | 3.164             | 0.0   | 0.0         | 0.0  |  |
| TcSi <sub>2</sub> | THX                       | $C2/m(12)$        | $C2/m(12)$        | - | 6.83               | 6.84  | 59.9    | 6.54  | 7.64  | 48.8    | 0.177             | 0.237             | 8.0   | 3.9         | 0.0  |  |
| TcTa <sub>2</sub> | THX                       | $C2/m(12)$        | $C2/m(12)$        | - | -                  | -     | -       | -     | -     | -       | 3.293             | 3.299             | -     | 0.0         | -    |  |
| RuC <sub>2</sub>  | PXX                       | -                 | $C2/m(12)$        | - | 8.93               | 8.93  | 54.1    | 8.87  | 8.87  | 42.2    | 0.077             | 5.364             | 0.0   | 0.0         | -    |  |
| RuN <sub>2</sub>  | PXX                       | -                 | $C2/m(12)$        | - | 8.93               | 8.93  | 54.1    | 8.87  | 8.87  | 42.2    | 0.077             | 5.364             | 0.0   | 0.0         | -    |  |
| RuS <sub>2</sub>  | TPX                       | $P2_1/m(11)$      | $C2/m(12)$        | - | 8.15               | 9.42  | 30.0    | -     | -     | -       | 0.418             | 1.389             | 0.0   | 0.0         | 0.0  |  |
| RuV <sub>2</sub>  | THX                       | $C2/m(12)$        | $C2/m(12)$        | - | 8.15               | 9.42  | 30.0    | -     | -     | -       | 4.418             | 5.983             | 0.0   | 0.0         | -    |  |
| RuY <sub>2</sub>  | HPX                       | $C2/m(12)$        | $C2/m(12)$        | - | 8.15               | 9.42  | 30.0    | -     | -     | -       | 4.418             | 5.983             | 0.0   | 0.0         | -    |  |
| RuTe <sub>2</sub> | TXH                       | $C2/m(12)$        | $C2/m(12)$        | - | 8.15               | 9.42  | 30.0    | -     | -     | -       | 4.418             | 5.983             | 0.0   | 0.0         | -    |  |
| RuTa <sub>2</sub> | HTX                       | $C2/m(12)$        | $C2/m(12)$        | - | 8.15               | 9.42  | 30.0    | -     | -     | -       | 4.418             | 5.983             | 0.0   | 0.0         | -    |  |
| RhLi <sub>2</sub> | PTH                       | $P4/mmm(123)$     | $P4/mmm(123)$     | - | 5.54               | 7.85  | 45.2    | 5.54  | 7.84  | 45.1    | 0.133             | 0.149             | 0.0   | 0.0         | 0.0  |  |
| RhG <sub>2</sub>  | THX                       | $C2/m(12)$        | $C2/m(12)$        | - | 7.96               | 7.94  | 42.9    | 7.56  | 7.56  | 45.0    | 0.346             | 4.161             | 0.0   | 0.0         | 0.0  |  |
| RhAs <sub>2</sub> | PXX                       | $C2/m(12)$        | $C2/m(12)$        | - | 6.83               | 6.84  | 59.9    | 6.54  | 7.64  | 48.8    | 0.177             | 0.237             | 8.0   | 3.9         | 0.0  |  |
| PdF <sub>2</sub>  | PTH                       | $P3m1(164)$       | $C2/m(12)$        | - | -                  | -     | -       | -     | -     | -       | 0.177             | 0.237             | 8.0   | 3.9         | 0.0  |  |
| PdAl <sub>2</sub> | HXX                       | $C2/m(12)$        | $C2/m(12)$        | - | -                  | -     | -       | -     | -     | -       | 0.177             | 0.237             | 8.0   | 3.9         | 0.0  |  |
| PdZr <sub>2</sub> | HXX                       | $C2/m(12)$        | $C2/m(12)$        | - | -                  | -     | -       | -     | -     | -       | 0.177             | 0.237             | 8.0   | 3.9         | 0.0  |  |
| PdSb <sub>2</sub> | THX                       | $C2/m(12)$        | $C2/m(12)$        | - | 8.93               | 8.93  | 54.1    | 8.87  | 8.87  | 42.2    | 0.077             | 5.364             | 0.0   | 0.0         | -    |  |

(Continued on next page)



Table 4: List of  $C2/m(12)$ 

| species           | Initial structure indices | space group  |               |            | lattice parameters |       |                |       |       |                | relative energy   |                   |                       | spin moment |        |      |      |      |
|-------------------|---------------------------|--------------|---------------|------------|--------------------|-------|----------------|-------|-------|----------------|-------------------|-------------------|-----------------------|-------------|--------|------|------|------|
|                   |                           | T            | H             | P          | T                  |       |                | H     |       |                | $\Delta E_1$ [eV] | $\Delta E_2$ [eV] | [ $\mu_B$ /unit cell] |             |        |      |      |      |
|                   |                           |              |               |            | a [Å]              | b [Å] | $\gamma$ [deg] | a [Å] | b [Å] | $\gamma$ [deg] |                   |                   | T                     | H           | P      |      |      |      |
| PdI <sub>2</sub>  | THP                       | $C2/m(12)$   | $Cmnm(65)$    | $P1(2)$    | 10.07              | 10.07 | 45.5           | 8.96  | 8.96  | 51.8           | 14.21             | 7.29              | 75.9                  | 0.153       | 0.225  | 0.0  | 0.0  | 0.0  |
| PdPt <sub>2</sub> | TPX                       | $C2/m(12)$   | —             | $Pmmm(59)$ | 9.36               | 9.36  | 33.0           | —     | —     | —              | 9.04              | 9.03              | 57.0                  | 0.607       | 0.845  | 0.0  | —    | 0.0  |
| PdHg <sub>2</sub> | HTX                       | $C2/m(12)$   | $Pmmm(47)$    | —          | 8.86               | 8.87  | 40.0           | 7.61  | 7.61  | 37.8           | 9.41              | 9.42              | 44.6                  | 0.741       | 2.403  | 0.0  | 0.0  | —    |
| PdTi <sub>2</sub> | HTP                       | $P3m1(164)$  | $P1(2)$       | —          | 8.85               | 8.83  | 56.7           | 8.37  | 8.29  | 44.7           | 9.41              | 9.42              | 44.6                  | 0.489       | 0.506  | 0.0  | 0.0  | —    |
| AgF <sub>2</sub>  | HTX                       | $C2/m(12)$   | $P1(2)$       | —          | 7.74               | 7.75  | 50.8           | 11.61 | 11.31 | 34.2           | —                 | —                 | —                     | 0.309       | 1.359  | 3.7  | 0.0  | —    |
| AgCl <sub>2</sub> | THP                       | $C2/m(12)$   | $Cmnm(65)$    | —          | 8.35               | 8.34  | 52.2           | 8.09  | 8.09  | 54.0           | 12.12             | 12.12             | 36.2                  | 0.354       | 0.505  | 3.0  | 2.8  | 0.0  |
| AgK <sub>2</sub>  | THX                       | $C2/m(12)$   | $P4/mmm(123)$ | —          | 10.05              | 10.04 | 56.1           | 10.08 | 10.29 | 50.5           | —                 | —                 | —                     | 0.348       | 2.338  | 0.0  | 0.0  | —    |
| AgSc <sub>2</sub> | TPH                       | $C2/m(12)$   | $P4/mmm(123)$ | —          | 9.29               | 6.62  | 57.6           | 6.51  | 9.21  | 45.0           | 9.30              | 6.64              | 57.5                  | 0.003       | 0.219  | 0.0  | 0.0  | 0.0  |
| AgMn <sub>2</sub> | THX                       | $C2/m(12)$   | $P1(1)$       | —          | 8.19               | 5.68  | 57.8           | 7.79  | 8.67  | 39.0           | —                 | —                 | —                     | 0.126       | 6.400  | 33.0 | 34.4 | —    |
| AgPd <sub>2</sub> | PXX                       | —            | —             | —          | —                  | —     | —              | —     | —     | —              | 10.12             | 5.58              | 46.0                  | 1.479       | 3.669  | —    | —    | 0.0  |
| AgIn <sub>2</sub> | HXX                       | $C2/m(12)$   | $C2/m(12)$    | —          | 9.23               | 9.23  | 50.7           | 8.95  | 7.89  | 42.5           | —                 | —                 | —                     | 2.390       | 3.107  | —    | —    | 0.0  |
| AgI <sub>2</sub>  | THP                       | $C2/m(12)$   | $C2/m(12)$    | —          | 8.87               | 9.45  | 43.8           | 9.35  | 9.35  | 50.1           | 10.18             | 14.09             | 66.1                  | 0.005       | 0.026  | 0.0  | 0.0  | 0.0  |
| AgPb <sub>2</sub> | TXX                       | $C2/m(12)$   | —             | —          | 11.38              | 11.29 | 34.1           | —     | —     | —              | —                 | —                 | —                     | 1.367       | 1.829  | 0.0  | —    | —    |
| CdP <sub>2</sub>  | TXX                       | $C2/m(12)$   | —             | —          | 8.05               | 8.07  | 59.1           | 7.91  | 7.90  | 59.5           | 7.80              | 9.10              | 54.1                  | 0.438       | 0.706  | 0.0  | 0.0  | 0.0  |
| CdCa <sub>2</sub> | PTH                       | $C2/m(12)$   | $P6m2(187)$   | —          | 9.02               | 9.89  | 46.7           | 9.81  | 6.93  | 45.0           | 10.05             | 7.29              | 56.9                  | 0.040       | 0.730  | 0.0  | 0.0  | 1.5  |
| CdY <sub>2</sub>  | PHT                       | $C2/m(12)$   | $P4/mmm(123)$ | —          | 10.32              | 10.33 | 31.8           | 10.31 | 8.33  | 34.1           | —                 | —                 | —                     | 0.203       | 3.136  | 0.0  | 0.0  | —    |
| CdPd <sub>2</sub> | HTX                       | $C2/m(12)$   | $Pmmm(47)$    | —          | 10.64              | 10.61 | 56.1           | 9.24  | 9.19  | 58.5           | 10.29             | 10.26             | 60.1                  | 0.497       | 0.549  | 0.0  | 0.0  | 0.0  |
| CdBa <sub>2</sub> | HPT                       | $C2/m(12)$   | $P6m2(187)$   | —          | 9.39               | 9.40  | 41.4           | 9.32  | 9.26  | 40.5           | —                 | —                 | —                     | 0.451       | 2.846  | 0.0  | 0.0  | —    |
| CdTi <sub>2</sub> | THX                       | $C2/m(12)$   | $P4/mmm(123)$ | —          | 12.89              | 12.88 | 39.4           | 9.20  | 9.20  | 58.2           | —                 | —                 | —                     | 0.525       | 2.600  | 0.0  | 0.0  | —    |
| CdBi <sub>2</sub> | THX                       | $C2/m(12)$   | $P6m2(187)$   | —          | 11.36              | 10.25 | 48.2           | 10.39 | 9.49  | 57.2           | 10.57             | 10.48             | 51.1                  | 0.234       | 0.567  | 0.0  | 0.0  | 0.0  |
| InK <sub>2</sub>  | HPT                       | $C2/m(12)$   | $Pmma(51)$    | —          | 10.64              | 10.63 | 31.5           | —     | —     | —              | —                 | —                 | —                     | 1.117       | 5.256  | 0.0  | —    | —    |
| InTi <sub>2</sub> | TXX                       | $C2/m(12)$   | —             | —          | 10.66              | 10.65 | 31.1           | —     | —     | —              | —                 | —                 | —                     | 3.078       | 3.226  | 0.0  | —    | —    |
| InV <sub>2</sub>  | TXX                       | $C2/m(12)$   | —             | —          | 8.51               | 8.50  | 47.8           | 8.53  | 8.53  | 46.2           | 9.24              | 9.24              | 68.7                  | 0.058       | 0.390  | 0.0  | 0.0  | 0.0  |
| InTe <sub>2</sub> | HPT                       | $C2/m(12)$   | $C222(21)$    | —          | 8.19               | 9.23  | 45.0           | 7.40  | 8.58  | 44.3           | —                 | —                 | —                     | 0.589       | 1.785  | 34.3 | 33.5 | —    |
| SnCr <sub>2</sub> | HTX                       | $P2_1/m(11)$ | $C2/m(12)$    | —          | 9.29               | 8.28  | 60.5           | —     | —     | —              | 9.38              | 9.31              | 59.7                  | 0.075       | 1.341  | 0.0  | —    | 1.4  |
| SbCa <sub>2</sub> | TPX                       | $C2/m(12)$   | —             | —          | 9.82               | 9.78  | 60.4           | —     | —     | —              | 9.78              | 9.90              | 59.3                  | 0.004       | 1.210  | 0.0  | —    | 0.0  |
| SbSr <sub>2</sub> | TPX                       | $C2/m(12)$   | —             | —          | 13.71              | 13.70 | 40.2           | —     | —     | —              | 11.90             | 12.37             | 39.3                  | 0.598       | 1.834  | 0.0  | —    | 0.0  |
| CsSe <sub>2</sub> | PTX                       | $C2/m(12)$   | —             | —          | 15.79              | 15.78 | 43.4           | —     | —     | —              | 15.56             | 15.55             | 45.8                  | 0.040       | 4.966  | 14.0 | —    | 13.4 |
| CsY <sub>2</sub>  | PTX                       | $C2/m(12)$   | —             | —          | 15.03              | 15.01 | 41.2           | —     | —     | —              | 15.17             | 15.15             | 40.9                  | 0.504       | 0.543  | 0.0  | 0.0  | 0.0  |
| CsIn <sub>2</sub> | HPT                       | $C2/m(12)$   | $P1(1)$       | —          | 14.54              | 14.54 | 41.5           | 13.63 | 12.06 | —              | 14.33             | 14.36             | 45.4                  | 0.384       | 1.809  | 0.0  | —    | 0.0  |
| CsTe <sub>2</sub> | TPX                       | $C2/m(12)$   | —             | —          | 15.60              | 15.58 | 41.9           | —     | —     | —              | 15.61             | 15.60             | 41.8                  | 0.041       | 4.172  | 0.0  | —    | 0.0  |
| CsBi <sub>2</sub> | TPX                       | $C2/m(12)$   | —             | —          | 15.08              | 15.10 | 35.0           | —     | —     | —              | —                 | —                 | —                     | 1.192       | 4.126  | 0.0  | —    | —    |
| BaY <sub>2</sub>  | TXX                       | $C2/m(12)$   | —             | —          | 14.17              | 14.16 | 30.4           | —     | —     | —              | —                 | —                 | —                     | 4.497       | 11.981 | 0.0  | —    | —    |
| BaPd <sub>2</sub> | TPX                       | $C2/m(12)$   | —             | —          | 11.56              | 11.56 | 46.8           | —     | —     | —              | 11.61             | 11.62             | 48.4                  | 0.173       | 1.447  | 0.0  | —    | 0.0  |
| BaPb <sub>2</sub> | TPX                       | $C2/m(12)$   | $Cmnm(65)$    | —          | 13.51              | 13.52 | 42.2           | —     | —     | —              | 13.58             | 13.58             | 44.3                  | 0.021       | 4.013  | 0.0  | —    | 0.0  |
| HfAu <sub>2</sub> | PTH                       | $C2/m(12)$   | $P6m2(187)$   | —          | 7.59               | 7.84  | 59.7           | 7.56  | 7.56  | 59.8           | 7.76              | 7.75              | 57.3                  | 0.231       | 0.516  | 0.0  | 0.0  | 0.0  |
| TaO <sub>2</sub>  | THX                       | $C2/m(12)$   | $P6m2(187)$   | —          | 7.35               | 6.29  | 50.1           | 6.18  | 6.19  | 60.1           | 6.01              | 6.00              | 60.2                  | 0.239       | 0.595  | 0.0  | 0.0  | 0.0  |
| TaS <sub>2</sub>  | HPT                       | $P3m1(164)$  | $P6m2(187)$   | —          | 6.76               | 6.76  | 60.1           | 6.68  | 6.68  | 60.0           | 6.57              | 7.69              | 50.1                  | 0.242       | 0.728  | 0.0  | 0.0  | 0.0  |
| TaIn <sub>2</sub> | PXX                       | —            | —             | —          | —                  | —     | —              | —     | —     | —              | 6.69              | 6.07              | 45.2                  | 2.749       | 2.836  | —    | —    | 0.0  |
| TaTe <sub>2</sub> | PTH                       | $P2_1/m(11)$ | $P6m2(187)$   | —          | 7.50               | 7.50  | 54.7           | 7.44  | 7.43  | 59.9           | —                 | —                 | —                     | 0.111       | 0.115  | 0.0  | 0.0  | 0.0  |
| TaBi <sub>2</sub> | TPX                       | $C2/m(12)$   | —             | —          | 7.10               | 7.11  | 53.7           | —     | —     | —              | 8.00              | 8.00              | 47.9                  | 0.322       | 5.303  | 0.0  | —    | 0.0  |
| WBr <sub>2</sub>  | HPT                       | $C2/m(12)$   | $Cmnm(65)$    | —          | 9.46               | 9.46  | 47.9           | 8.60  | 8.57  | 53.1           | 7.67              | 14.49             | 74.5                  | 0.039       | 0.356  | 15.9 | 15.9 | 0.0  |
| WTe <sub>2</sub>  | HPT                       | $C2/m(12)$   | $P1(2)$       | —          | 9.13               | 8.16  | 32.9           | 8.94  | 7.45  | 38.0           | 6.10              | 8.07              | 59.2                  | 0.614       | 0.738  | 0.0  | 0.0  | 0.0  |
| ReSi <sub>2</sub> | TXX                       | $C2/m(12)$   | —             | —          | 8.56               | 8.56  | 40.3           | —     | —     | —              | —                 | —                 | —                     | 0.861       | 1.573  | 0.0  | —    | —    |
| ReSe <sub>2</sub> | TPX                       | $C2/m(12)$   | —             | —          | 6.86               | 6.67  | 60.3           | —     | —     | —              | —                 | —                 | —                     | 0.093       | 2.313  | 0.0  | —    | 0.0  |
| ReCs <sub>2</sub> | TXX                       | $C2/m(12)$   | —             | —          | 10.91              | 11.87 | 45.3           | —     | —     | —              | —                 | —                 | —                     | 10.951      | 11.154 | 6.0  | —    | —    |
| OsNb <sub>2</sub> | HTX                       | $C2/m(12)$   | $Pmmm(47)$    | —          | 7.80               | 8.64  | 46.1           | 9.59  | 7.60  | 37.6           | —                 | —                 | —                     | 0.293       | 2.822  | 0.0  | 0.0  | —    |
| OsTe <sub>2</sub> | TPX                       | $P2_1/m(11)$ | —             | —          | 7.99               | 7.32  | 57.8           | —     | —     | —              | 7.79              | 7.32              | 57.6                  | 0.221       | 3.032  | 0.0  | —    | 0.0  |
| OsBa <sub>2</sub> | PXX                       | —            | —             | —          | 6.08               | 6.12  | 59.9           | —     | —     | —              | 10.04             | 9.05              | 47.4                  | 1.409       | 3.666  | —    | —    | 2.5  |
| IrN <sub>2</sub>  | TPX                       | $C2/m(12)$   | —             | —          | 8.37               | 8.37  | 59.6           | —     | —     | —              | 6.12              | 6.09              | 50.9                  | 0.001       | 1.903  | 0.0  | —    | 0.0  |
| IrY <sub>2</sub>  | PTX                       | $P3m1(164)$  | —             | —          | 8.37               | 8.37  | 59.6           | —     | —     | —              | 7.75              | 9.08              | 50.1                  | 0.156       | 2.223  | 0.0  | —    | 0.0  |
| IrHf <sub>2</sub> | PXX                       | —            | —             | —          | —                  | —     | —              | —     | —     | —              | 6.66              | 8.17              | 52.1                  | 1.216       | 1.762  | —    | —    | 0.0  |
| PtAl <sub>2</sub> | HXX                       | —            | $C2/m(12)$    | —          | —                  | —     | —              | 7.62  | 6.51  | 46.1           | —                 | —                 | —                     | 2.256       | 2.423  | —    | —    | 0.0  |
| PtP <sub>2</sub>  | TPH                       | $C2/m(12)$   | $Pm(6)$       | —          | 7.99               | 7.99  | 53.2           | 7.78  | 7.73  | 51.1           | 7.98              | 7.98              | 53.4                  | 0.007       | 0.282  | 0.0  | 0.0  | 0.0  |
| PtV <sub>2</sub>  | PXX                       | —            | —             | —          | —                  | —     | —              | —     | —     | —              | 7.51              | 6.20              | 45.1                  | 3.050       | 5.944  | —    | —    | 0.0  |

(Continued on next page)

Table 4: List of  $C2/m(12)$ 

| species           | Initial structure indices | space group |             |          | lattice parameters |          |          |      |                   |                   | relative energy |       |       | spin moment                |       |       |       |       |       |
|-------------------|---------------------------|-------------|-------------|----------|--------------------|----------|----------|------|-------------------|-------------------|-----------------|-------|-------|----------------------------|-------|-------|-------|-------|-------|
|                   |                           | T           | H           |          | T                  | H        |          | P    | $\Delta E_1$ [eV] | $\Delta E_2$ [eV] | T               | H     | P     | $ \mu_B/\text{unit cell} $ |       |       |       |       |       |
|                   |                           |             | C2/m(12)    | C2/m(12) |                    | C2/m(12) | C2/m(12) |      |                   |                   |                 |       |       |                            | a [Å] | b [Å] | c [Å] | a [Å] | b [Å] |
| PtAs <sub>2</sub> | TPX                       | C2/m(12)    | Am2(38)     | C2/m(12) | 8.31               | 8.31     | 8.32     | 8.32 | 8.32              | 53.4              | 53.4            | 8.31  | 8.31  | 8.31                       | 0.052 | 0.125 | 0.0   | 0.0   | 0.0   |
| PtZr <sub>2</sub> | PXX                       | -           | -           | -        | -                  | -        | -        | -    | -                 | -                 | -               | -     | -     | -                          | 1.498 | 3.438 | -     | -     | 0.0   |
| PtRu <sub>2</sub> | THP                       | C2/m(12)    | Am2(38)     | C2/m(12) | 9.42               | 9.42     | 9.04     | 9.04 | 9.04              | 33.1              | 33.1            | 8.68  | 8.68  | 8.68                       | 0.224 | 0.255 | 5.8   | 0.0   | 0.0   |
| PtRh <sub>2</sub> | TXX                       | C2/m(12)    | -           | C2/m(12) | 9.23               | 9.23     | 33.5     | 33.5 | 33.5              | 33.5              | 33.5            | 8.86  | 8.86  | 8.86                       | 1.102 | 3.120 | 0.0   | -     | 0.0   |
| Pt <sub>2</sub>   | THX                       | C2/m(12)    | Cmmm(65)    | C2/m(12) | 10.27              | 10.31    | 44.7     | 44.7 | 9.81              | 44.7              | 47.3            | -     | -     | -                          | 0.019 | 2.617 | 0.0   | 0.0   | -     |
| PtHf <sub>2</sub> | TXX                       | C2/m(12)    | -           | C2/m(12) | 6.43               | 8.63     | 56.0     | 56.0 | 33.1              | 33.1              | 33.2            | -     | -     | -                          | 1.333 | 2.460 | 0.0   | -     | -     |
| PtIr <sub>2</sub> | HXX                       | C2/m(12)    | Am2(38)     | C2/m(12) | 9.25               | 9.25     | 33.1     | 33.1 | 9.09              | 33.2              | 33.2            | -     | -     | -                          | 0.235 | 1.098 | 0.0   | 0.0   | -     |
| PtAu <sub>2</sub> | HXX                       | C2/m(12)    | C2/m(12)    | C2/m(12) | 7.88               | 6.77     | 44.4     | 44.4 | 7.88              | 44.4              | 44.4            | -     | -     | -                          | 3.958 | 3.996 | -     | 0.0   | -     |
| AuO <sub>2</sub>  | PTH                       | C2/m(12)    | C2/m(12)    | C2/m(12) | 6.93               | 6.93     | 53.9     | 53.9 | 6.14              | 53.9              | 66.7            | 6.91  | 6.91  | 6.91                       | 0.278 | 0.371 | 3.3   | 4.0   | 0.0   |
| AuP <sub>2</sub>  | TPX                       | P2/m(10)    | -           | C2/m(12) | 11.09              | 7.68     | 46.9     | 46.9 | -                 | -                 | -               | 9.01  | 9.00  | 9.00                       | 0.664 | 1.583 | 0.0   | -     | 0.0   |
| AuCl <sub>2</sub> | THP                       | C2/m(12)    | Cmmm(65)    | C2/m(12) | 9.06               | 9.08     | 47.6     | 47.6 | 8.19              | 47.6              | 53.3            | 14.73 | 7.34  | 7.34                       | 0.056 | 0.313 | 3.2   | 3.1   | 0.0   |
| AuSe <sub>2</sub> | HTP                       | C2/m(12)    | P6m2(187)   | C2/m(12) | 8.70               | 8.65     | 55.4     | 55.4 | 6.98              | 55.4              | 60.0            | 8.68  | 8.60  | 8.60                       | 0.216 | 0.241 | 0.0   | 0.0   | 0.0   |
| AuCr <sub>2</sub> | HXX                       | -           | C2/m(12)    | C2/m(12) | -                  | -        | 42.8     | 42.8 | 8.58              | 42.8              | 42.8            | -     | -     | -                          | 3.104 | 3.114 | -     | 36.8  | -     |
| AuGa <sub>2</sub> | THX                       | C2/m(12)    | Am2(38)     | C2/m(12) | 8.84               | 8.84     | 35.9     | 35.9 | 8.86              | 35.9              | 35.7            | -     | -     | -                          | 0.157 | 0.838 | 0.0   | 0.0   | -     |
| AuSe <sub>2</sub> | HPT                       | P3m1(164)   | Pmm2(25)    | C2/m(12) | 7.62               | 7.61     | 60.0     | 60.0 | 7.83              | 60.0              | 44.2            | 9.54  | 9.89  | 9.89                       | 0.426 | 0.545 | 0.0   | 0.0   | 0.0   |
| AuBr <sub>2</sub> | THX                       | C2/m(12)    | Cmmm(65)    | C2/m(12) | 9.13               | 9.14     | 49.1     | 49.1 | 8.48              | 49.1              | 53.4            | -     | -     | -                          | 0.020 | 0.853 | 0.0   | 0.0   | -     |
| AuY <sub>2</sub>  | HPT                       | C2/m(12)    | P6m2(187)   | C2/m(12) | 9.06               | 9.01     | 55.0     | 55.0 | 7.58              | 55.0              | 60.2            | 9.01  | 8.97  | 8.97                       | 0.274 | 0.282 | 0.0   | 0.0   | 0.0   |
| AuPd <sub>2</sub> | THX                       | C2/m(12)    | Am2(38)     | C2/m(12) | 9.68               | 9.67     | 32.9     | 32.9 | 9.40              | 32.9              | 33.5            | -     | -     | -                          | 0.742 | 2.001 | 0.0   | 0.0   | -     |
| AuI <sub>2</sub>  | THX                       | C2/m(12)    | Cmmm(65)    | C2/m(12) | 9.66               | 9.68     | 48.9     | 48.9 | 9.12              | 48.9              | 52.3            | -     | -     | -                          | 0.111 | 0.875 | 0.0   | 0.0   | -     |
| HgCl <sub>2</sub> | HTX                       | P3m1(164)   | C2/m(12)    | C2/m(12) | 8.21               | 8.22     | 57.2     | 57.2 | 9.88              | 57.2              | 53.0            | -     | -     | -                          | 0.350 | 1.827 | 0.0   | 0.0   | -     |
| HgSe <sub>2</sub> | PHX                       | -           | C2/m(12)    | P1(1)    | -                  | -        | -        | -    | 8.58              | -                 | 86.4            | 11.54 | 9.97  | 9.97                       | 0.539 | 4.257 | -     | 0.0   | 0.0   |
| HgBr <sub>2</sub> | THX                       | C2/m(12)    | C2/m(12)    | C2/m(12) | 8.49               | 9.57     | 54.9     | 54.9 | 8.43              | 54.9              | 68.4            | -     | -     | -                          | 0.079 | 0.926 | 0.0   | 0.0   | -     |
| HgI <sub>2</sub>  | HTX                       | C2/m(12)    | P4m2(115)   | C2/m(12) | 10.21              | 9.10     | 54.9     | 54.9 | 9.01              | 54.9              | 87.1            | -     | -     | -                          | 0.295 | 1.328 | 0.0   | 0.0   | -     |
| HgBa <sub>2</sub> | PHX                       | -           | P6m2(187)   | C2/m(12) | -                  | -        | 38.3     | 38.3 | 9.26              | -                 | 58.8            | 8.96  | 11.04 | 11.04                      | 0.760 | 1.059 | -     | 0.0   | 0.0   |
| HgBi <sub>2</sub> | THX                       | C2/m(12)    | -           | C2/m(12) | 13.27              | 13.23    | -        | -    | 7.66              | -                 | 45.0            | -     | -     | -                          | 2.268 | 3.304 | 0.0   | -     | -     |
| TlCa <sub>2</sub> | HPX                       | -           | P4/mmm(123) | C2/m(12) | -                  | -        | -        | -    | -                 | -                 | -               | 9.88  | 8.16  | 8.16                       | 0.389 | 1.984 | -     | 0.0   | 0.0   |
| TlSr <sub>2</sub> | PXX                       | -           | -           | C2/m(12) | -                  | -        | -        | -    | -                 | -                 | -               | 8.58  | 10.54 | 10.54                      | 1.108 | 1.465 | -     | -     | 0.0   |
| PbSc <sub>2</sub> | PXX                       | -           | -           | C2/m(12) | -                  | -        | -        | -    | -                 | -                 | -               | 8.07  | 6.17  | 6.17                       | 2.664 | 6.488 | -     | -     | 0.0   |
| BiCa <sub>2</sub> | TPX                       | C2/m(12)    | -           | C2/m(12) | 9.52               | 9.42     | 59.6     | 59.6 | -                 | -                 | -               | 9.41  | 9.44  | 9.44                       | 0.001 | 1.141 | 0.0   | -     | 0.0   |
| BiSr <sub>2</sub> | TPX                       | C2/m(12)    | -           | C2/m(12) | 10.03              | 9.93     | 59.8     | 59.8 | -                 | -                 | -               | 9.92  | 10.01 | 10.01                      | 0.009 | 1.115 | 0.0   | -     | 0.0   |

Table 5: List of  $P\bar{6}m2(187)$ 

| species           | Initial structure indices | space group       |                   |                   | lattice parameters |       |         |       |       |         |                   | relative energy   |      | spin moment |      |  |
|-------------------|---------------------------|-------------------|-------------------|-------------------|--------------------|-------|---------|-------|-------|---------|-------------------|-------------------|------|-------------|------|--|
|                   |                           | T                 | H                 | P                 | a [Å]              | b [Å] | c [deg] | a [Å] | b [Å] | c [deg] | $\Delta E_1$ [eV] | $\Delta E_2$ [eV] | T    | H           | P    |  |
| LiAl <sub>2</sub> | HXX                       | $P\bar{3}m1(164)$ | $P\bar{6}m2(187)$ | —                 | 5.46               | 5.45  | 59.9    | 5.45  | 5.45  | 60.0    | 0.046             | 3.644             | 0.0  | 0.0         | —    |  |
| LiAg <sub>2</sub> | HXX                       | —                 | $P\bar{6}m2(187)$ | —                 | —                  | 5.83  | 59.9    | 5.83  | 5.84  | 59.9    | 3.253             | 3.264             | —    | 0.0         | —    |  |
| LiBe <sub>2</sub> | HXX                       | $Cmmm(65)$        | $P\bar{6}m2(187)$ | —                 | 4.24               | 4.73  | 56.1    | 4.39  | 4.39  | 120.0   | 0.167             | 6.772             | 0.0  | 0.0         | —    |  |
| BeP <sub>2</sub>  | HXX                       | —                 | $P\bar{6}m2(187)$ | —                 | —                  | 6.79  | 60.0    | 6.79  | 6.79  | 60.0    | 1.270             | 1.864             | —    | 0.0         | —    |  |
| BeCa <sub>2</sub> | PTH                       | $P\bar{3}m1(164)$ | $P\bar{6}m2(187)$ | $P\bar{3}m1(164)$ | 8.62               | 8.62  | 58.8    | 7.77  | 7.76  | 59.9    | 8.32              | 8.33              | 60.2 | 0.0         | 0.0  |  |
| BeRh <sub>2</sub> | THX                       | $C2/m(12)$        | $P\bar{6}m2(187)$ | —                 | 6.32               | 5.43  | 49.5    | 5.32  | 5.32  | 59.8    | 0.239             | 1.681             | 0.0  | 0.0         | 0.0  |  |
| BeSb <sub>2</sub> | HXX                       | —                 | $P\bar{6}m2(187)$ | —                 | —                  | 7.71  | 59.2    | 7.71  | 7.71  | 59.2    | 1.290             | 1.822             | —    | 0.0         | —    |  |
| BeBa <sub>2</sub> | PTH                       | $P\bar{3}m1(164)$ | $P\bar{6}m2(187)$ | $P\bar{3}m1(164)$ | 10.03              | 10.03 | 57.0    | 8.97  | 8.96  | 58.2    | 9.87              | 9.85              | 58.8 | 0.0         | 0.0  |  |
| BePt <sub>2</sub> | HXX                       | —                 | $P\bar{6}m2(187)$ | —                 | —                  | 5.51  | 60.0    | 5.51  | 5.52  | 60.0    | 1.509             | 11.273            | —    | 0.0         | —    |  |
| BeAu <sub>2</sub> | HXX                       | $P\bar{3}m1(164)$ | $P\bar{6}m2(187)$ | —                 | 6.13               | 6.10  | 54.9    | 6.08  | 6.09  | 55.7    | 0.104             | 0.949             | 0.0  | 0.0         | —    |  |
| BNi <sub>2</sub>  | THX                       | —                 | $P\bar{6}m2(187)$ | $P1(1)$           | 5.27               | 5.27  | 59.6    | 7.90  | 7.89  | 59.7    | 8.65              | 8.01              | 47.7 | 0.0         | 0.0  |  |
| BRu <sub>2</sub>  | HXX                       | —                 | $P\bar{6}m2(187)$ | —                 | —                  | 5.57  | 60.0    | 5.57  | 5.58  | 60.0    | 1.003             | 1.062             | —    | 0.0         | —    |  |
| BRh <sub>2</sub>  | TPH                       | $P2_1/m(11)$      | $P\bar{6}m2(187)$ | $P2_1/m(11)$      | 5.51               | 5.51  | 60.0    | 5.47  | 5.47  | 60.0    | 0.015             | 0.267             | 0.0  | 0.0         | 0.0  |  |
| BPd <sub>2</sub>  | THX                       | $P\bar{3}m1(164)$ | $P\bar{6}m2(187)$ | —                 | 5.87               | 5.87  | 60.0    | 5.73  | 5.73  | 59.9    | 0.724             | 3.647             | 0.0  | 0.0         | —    |  |
| BW <sub>2</sub>   | HXX                       | $P\bar{3}m1(164)$ | $P\bar{6}m2(187)$ | —                 | 6.16               | 6.16  | 60.0    | 5.77  | 5.77  | 59.9    | 0.647             | 4.847             | 0.0  | 0.0         | —    |  |
| BRe <sub>2</sub>  | HXX                       | —                 | $P\bar{6}m2(187)$ | —                 | —                  | 5.66  | 60.0    | 5.66  | 5.66  | 60.0    | 4.914             | 7.263             | —    | 0.0         | —    |  |
| Blr <sub>2</sub>  | THX                       | $P\bar{3}m1(164)$ | $P\bar{6}m2(187)$ | —                 | 5.43               | 5.43  | 60.0    | 5.46  | 5.46  | 60.0    | 0.226             | 13.691            | 0.0  | 0.0         | —    |  |
| BPt <sub>2</sub>  | THX                       | $P\bar{3}m1(164)$ | $P\bar{6}m2(187)$ | —                 | 5.71               | 5.72  | 60.0    | 5.68  | 5.69  | 60.0    | 0.524             | 2.810             | 0.0  | 0.0         | —    |  |
| CCr <sub>2</sub>  | THX                       | $P\bar{3}m1(164)$ | $P\bar{6}m2(187)$ | —                 | 5.62               | 5.65  | 59.8    | 5.27  | 5.26  | 59.8    | 0.352             | 7.427             | 0.0  | 0.0         | —    |  |
| CGe <sub>2</sub>  | THX                       | $P\bar{3}m1(164)$ | $P\bar{6}m2(187)$ | —                 | 6.25               | 6.26  | 60.0    | 6.19  | 6.19  | 60.0    | 0.382             | 1.232             | 0.0  | 0.0         | —    |  |
| CMo <sub>2</sub>  | HXX                       | —                 | $P\bar{6}m2(187)$ | —                 | —                  | 5.73  | 59.6    | 5.73  | 5.71  | 59.6    | 0.933             | 6.554             | —    | 0.0         | —    |  |
| CRu <sub>2</sub>  | HXX                       | —                 | $P\bar{6}m2(187)$ | —                 | —                  | 5.55  | 59.5    | 5.55  | 5.56  | 59.5    | 1.540             | 3.671             | —    | 0.0         | —    |  |
| CAG <sub>2</sub>  | HXX                       | $P\bar{3}m1(164)$ | $P\bar{6}m2(187)$ | —                 | 6.42               | 6.43  | 59.6    | 6.13  | 6.11  | 59.7    | 0.322             | 0.848             | 0.0  | 0.0         | —    |  |
| CW <sub>2</sub>   | HXX                       | —                 | $P\bar{6}m2(187)$ | —                 | —                  | 5.72  | 59.8    | 5.72  | 5.71  | 59.8    | 1.818             | 3.061             | —    | 0.0         | —    |  |
| CRe <sub>2</sub>  | HXX                       | —                 | $P\bar{6}m2(187)$ | —                 | —                  | 5.58  | 60.0    | 5.58  | 5.57  | 60.0    | 1.894             | 5.864             | —    | 0.0         | —    |  |
| CPb <sub>2</sub>  | THX                       | $P\bar{3}m1(164)$ | $P\bar{6}m2(187)$ | —                 | 7.28               | 7.29  | 59.9    | 7.15  | 7.16  | 59.8    | 0.592             | 3.316             | 0.0  | 0.0         | —    |  |
| NCr <sub>2</sub>  | THX                       | $P\bar{3}m1(164)$ | $P\bar{6}m2(187)$ | —                 | 5.67               | 5.67  | 60.7    | 5.25  | 5.22  | 59.6    | 0.144             | 3.984             | 7.2  | 0.0         | —    |  |
| NNb <sub>2</sub>  | THX                       | $P\bar{3}m1(164)$ | $P\bar{6}m2(187)$ | —                 | 6.16               | 6.29  | 60.1    | 5.86  | 5.84  | 59.9    | 0.283             | 4.541             | 0.0  | 0.0         | —    |  |
| NTa <sub>2</sub>  | HXX                       | $P\bar{3}m1(164)$ | $P\bar{6}m2(187)$ | —                 | 6.16               | 6.17  | 60.0    | 5.78  | 5.78  | 59.9    | 0.657             | 2.060             | 0.0  | 0.0         | —    |  |
| OTi <sub>2</sub>  | HXX                       | $P\bar{3}m1(164)$ | $P\bar{6}m2(187)$ | —                 | 5.96               | 5.98  | 59.9    | 5.60  | 5.60  | 59.9    | 0.164             | 1.350             | 0.0  | 0.0         | —    |  |
| OV <sub>2</sub>   | HTP                       | $P\bar{3}m1(164)$ | $P\bar{6}m2(187)$ | $P2/c(13)$        | 5.32               | 5.30  | 59.9    | 5.32  | 5.31  | 59.1    | 10.12             | 8.59              | 28.5 | 0.0         | 0.0  |  |
| OCr <sub>2</sub>  | HTP                       | $P\bar{3}m1(164)$ | $P\bar{6}m2(187)$ | $P2/c(13)$        | 5.74               | 5.73  | 59.9    | 5.08  | 5.08  | 59.8    | 10.96             | 10.98             | 28.8 | 0.0         | 31.9 |  |
| OFe <sub>2</sub>  | PTH                       | $P\bar{3}m1(164)$ | $P\bar{6}m2(187)$ | $Cmmm(65)$        | 5.37               | 5.37  | 59.8    | 5.33  | 5.32  | 59.8    | 10.08             | 10.07             | 30.6 | 25.4        | 24.2 |  |
| OZr <sub>2</sub>  | THX                       | —                 | $P\bar{6}m2(187)$ | —                 | 6.46               | 6.45  | 57.9    | 6.13  | 6.13  | 60.0    | 0.613             | 1.683             | 0.0  | 0.0         | —    |  |
| ONb <sub>2</sub>  | THX                       | —                 | $P\bar{6}m2(187)$ | —                 | 5.84               | 5.85  | 57.8    | 5.83  | 5.83  | 58.3    | 0.242             | 1.484             | 0.0  | 0.0         | —    |  |
| ONi <sub>2</sub>  | THX                       | —                 | $P\bar{6}m2(187)$ | —                 | 6.64               | 6.63  | 60.2    | 6.60  | 6.58  | 60.2    | 0.488             | 2.401             | 0.0  | 0.0         | —    |  |
| OTl <sub>2</sub>  | THX                       | —                 | $P\bar{6}m2(187)$ | —                 | 7.40               | 7.39  | 58.7    | 7.17  | 7.16  | 59.4    | 0.417             | 1.002             | 0.0  | 0.0         | —    |  |
| FNi <sub>2</sub>  | PTH                       | $P\bar{3}m1(164)$ | $P\bar{6}m2(187)$ | $Cmmm(65)$        | 7.04               | 7.03  | 59.0    | 6.84  | 6.85  | 59.1    | 13.89             | 13.93             | 26.9 | 0.0         | 0.0  |  |
| FK <sub>2</sub>   | PTH                       | $P\bar{3}m1(164)$ | $P\bar{6}m2(187)$ | $Cmmm(65)$        | 8.42               | 8.42  | 56.0    | 8.30  | 8.30  | 55.6    | 16.17             | 16.20             | 27.0 | 0.0         | 0.0  |  |
| FCd <sub>2</sub>  | THX                       | $P\bar{3}m1(164)$ | $P\bar{6}m2(187)$ | —                 | 6.19               | 6.19  | 58.3    | 6.26  | 6.25  | 56.7    | —                 | —                 | 0.0  | 0.0         | —    |  |
| FIn <sub>2</sub>  | THX                       | $P\bar{3}m1(164)$ | $P\bar{6}m2(187)$ | —                 | 6.56               | 6.56  | 60.2    | 6.54  | 6.54  | 60.1    | —                 | —                 | 0.0  | 0.0         | —    |  |
| FTl <sub>2</sub>  | THX                       | $P\bar{3}m1(164)$ | $P\bar{6}m2(187)$ | —                 | 7.19               | 7.19  | 58.3    | 7.08  | 7.07  | 59.0    | —                 | —                 | 0.0  | 0.0         | —    |  |
| NaN <sub>2</sub>  | THP                       | $P\bar{3}m1(164)$ | $P\bar{6}m2(187)$ | $Cmmm(65)$        | 8.21               | 8.27  | 59.1    | 7.59  | 7.59  | 56.0    | 10.65             | 10.56             | 44.8 | 0.0         | 20.0 |  |
| MgO <sub>2</sub>  | HPX                       | —                 | $P\bar{6}m2(187)$ | $P2/c(13)$        | —                  | —     | —       | 6.61  | 6.63  | 59.7    | 7.91              | 5.99              | 47.3 | —           | 0.0  |  |
| AlPd <sub>2</sub> | THX                       | $C2/m(12)$        | $P\bar{6}m2(187)$ | —                 | 6.96               | 5.63  | 53.2    | 5.88  | 5.88  | 59.9    | 0.056             | 4.414             | —    | 0.0         | —    |  |
| AlSb <sub>2</sub> | HTP                       | $P1(2)$           | $P\bar{6}m2(187)$ | $P2_1/m(11)$      | 10.18              | 8.75  | 44.0    | 8.25  | 8.26  | 59.2    | 10.29             | 8.07              | 50.1 | 0.0         | 0.0  |  |
| AlPt <sub>2</sub> | THX                       | $P4/nmm(123)$     | $P\bar{6}m2(187)$ | —                 | 8.00               | 5.65  | 44.7    | 5.81  | 5.82  | 60.1    | 0.176             | 0.251             | 0.0  | 0.0         | —    |  |
| SiGe <sub>2</sub> | HXX                       | —                 | $P\bar{6}m2(187)$ | —                 | —                  | 7.45  | 60.0    | 7.45  | 7.45  | 60.0    | 0.902             | 1.448             | —    | 0.0         | —    |  |
| SiPd <sub>2</sub> | HTP                       | $P2_1/m(11)$      | $P\bar{6}m2(187)$ | $P2_1/m(11)$      | 7.11               | 7.08  | 48.2    | 6.11  | 6.11  | 59.7    | 7.15              | 7.20              | 59.7 | 0.0         | 0.0  |  |
| SiSn <sub>2</sub> | HPX                       | —                 | $P\bar{6}m2(187)$ | $P1(2)$           | —                  | —     | —       | 8.03  | 8.04  | 59.5    | 8.18              | 8.04              | 61.6 | 0.0         | 0.0  |  |
| SiPt <sub>2</sub> | THX                       | $C2/m(12)$        | $P\bar{6}m2(187)$ | —                 | 6.46               | 6.49  | 52.7    | 5.96  | 6.44  | 57.4    | —                 | —                 | 0.0  | 0.0         | —    |  |
| SiPb <sub>2</sub> | HPT                       | $P\bar{3}m1(164)$ | $P\bar{6}m2(187)$ | $C2/m(12)$        | 8.80               | 8.80  | 58.1    | 8.38  | 8.38  | 57.9    | 8.09              | 9.08              | 55.7 | 0.0         | 0.0  |  |
| PFe <sub>2</sub>  | THX                       | $P\bar{3}m1(164)$ | $P\bar{6}m2(187)$ | —                 | 7.94               | 7.94  | 60.0    | 5.69  | 5.67  | 59.9    | 0.202             | 1.151             | 18.0 | 11.8        | —    |  |
| PGe <sub>2</sub>  | PTH                       | $P2_1/m(11)$      | $P\bar{6}m2(187)$ | $Cm(8)$           | 6.75               | 6.75  | 59.4    | 7.03  | 7.40  | 58.4    | 8.92              | 8.89              | 52.0 | 0.0         | 0.0  |  |
| PSn <sub>2</sub>  | THX                       | $P\bar{3}m1(164)$ | $P\bar{6}m2(187)$ | —                 | 7.39               | 7.39  | 59.6    | 7.52  | 7.52  | 59.9    | 0.222             | 1.592             | 0.0  | 0.0         | —    |  |
| PTl <sub>2</sub>  | TPH                       | $P\bar{3}m1(164)$ | $P\bar{6}m2(187)$ | $P1(2)$           | 8.73               | 8.73  | 59.5    | 8.33  | 8.33  | 59.3    | 9.18              | 7.67              | 76.7 | 0.0         | 0.0  |  |

(Continued on next page)

Table 5: List of  $P\bar{6}m2(187)$ 

| species           | Initial structure indices | space group       |                   |                   | lattice parameters |       |         |       |       |         | relative energy   |                   |                         | spin moment |      |  |
|-------------------|---------------------------|-------------------|-------------------|-------------------|--------------------|-------|---------|-------|-------|---------|-------------------|-------------------|-------------------------|-------------|------|--|
|                   |                           | T                 | H                 | P                 | a [Å]              | b [Å] | T [deg] | a [Å] | b [Å] | H [deg] | $\Delta E_1$ [eV] | $\Delta E_2$ [eV] | T [ $\mu_B$ /unit cell] | H           | P    |  |
| PPb <sub>2</sub>  | THX                       | $P\bar{3}m1(164)$ | $P\bar{6}m2(187)$ | —                 | 7.71               | 7.72  | 59.6    | 7.93  | 7.92  | 59.4    | —                 | —                 | 1.080                   | 0.0         | —    |  |
| SCa <sub>2</sub>  | THX                       | $P\bar{3}m1(164)$ | $P\bar{6}m2(187)$ | —                 | 7.82               | 7.81  | 60.0    | 7.73  | 7.73  | 59.8    | —                 | —                 | 0.798                   | 2.382       | —    |  |
| SSc <sub>2</sub>  | TPH                       | $P\bar{3}m1(164)$ | $P\bar{6}m2(187)$ | $P\bar{3}m1(156)$ | 7.04               | 7.03  | 60.0    | 6.79  | 6.79  | 60.0    | —                 | —                 | 0.224                   | 0.717       | 0.0  |  |
| SSn <sub>2</sub>  | TPH                       | $P\bar{3}m1(164)$ | $P\bar{6}m2(187)$ | $P1(1)$           | 7.14               | 7.16  | 59.7    | 7.02  | 7.02  | 59.1    | 60.2              | 60.2              | 0.037                   | 0.309       | 0.0  |  |
| STl <sub>2</sub>  | TPH                       | $P\bar{3}m1(164)$ | $P\bar{6}m2(187)$ | $P\bar{3}m1(164)$ | 8.54               | 8.54  | 59.0    | 8.33  | 8.33  | 59.4    | 85.7              | 85.7              | 0.008                   | 0.169       | 0.0  |  |
| ClK <sub>2</sub>  | TPH                       | $P\bar{3}m1(164)$ | $P\bar{6}m2(187)$ | $P2_1/m(11)$      | 9.24               | 9.26  | 57.9    | 9.08  | 9.10  | 57.3    | 10.37             | 10.65             | 0.130                   | 0.236       | 0.0  |  |
| ClCa <sub>2</sub> | THX                       | $P\bar{3}m1(164)$ | $P\bar{6}m2(187)$ | $P1(1)$           | 7.63               | 7.62  | 59.7    | 7.59  | 7.59  | 59.7    | —                 | —                 | 0.303                   | 1.497       | 0.0  |  |
| ClRb <sub>2</sub> | THP                       | $P\bar{3}m1(164)$ | $P\bar{6}m2(187)$ | $P1(1)$           | 9.82               | 9.83  | 58.0    | 9.69  | 9.71  | 56.6    | 11.98             | 11.99             | 0.278                   | 0.393       | 0.0  |  |
| ClSr <sub>2</sub> | THX                       | $P\bar{3}m1(164)$ | $P\bar{6}m2(187)$ | —                 | 8.25               | 8.24  | 59.6    | 8.33  | 8.33  | 57.7    | —                 | —                 | 0.343                   | 2.532       | 0.0  |  |
| ClY <sub>2</sub>  | HPT                       | $P\bar{3}m1(164)$ | $P\bar{6}m2(187)$ | $P2_12_12(18)$    | 7.08               | 7.08  | 60.1    | 7.05  | 7.04  | 60.4    | 8.72              | 8.72              | 0.622                   | 0.748       | 0.0  |  |
| ClIn <sub>2</sub> | THP                       | $P\bar{3}m1(164)$ | $P\bar{6}m2(187)$ | $P1(1)$           | 7.02               | 7.02  | 60.6    | 6.97  | 6.98  | 60.4    | 10.11             | 7.62              | 0.043                   | 0.467       | 0.0  |  |
| ClBa <sub>2</sub> | TPH                       | $P\bar{3}m1(164)$ | $P\bar{6}m2(187)$ | $Pmna(53)$        | 8.71               | 8.71  | 59.9    | 8.57  | 8.57  | 59.8    | 12.62             | 7.36              | 0.026                   | 0.085       | 0.0  |  |
| KF <sub>2</sub>   | THX                       | $P4mm(99)$        | $P\bar{6}m2(187)$ | —                 | 7.36               | 10.45 | 44.6    | 8.83  | 8.81  | 56.8    | —                 | —                 | 0.434                   | 1.186       | 4.0  |  |
| KCl <sub>2</sub>  | THX                       | $P4/mmm(123)$     | $P\bar{6}m2(187)$ | —                 | 8.54               | 12.06 | 45.0    | 10.13 | 10.20 | 57.7    | —                 | —                 | 0.294                   | 1.368       | 4.0  |  |
| CaO <sub>2</sub>  | PHX                       | —                 | $P\bar{6}m2(187)$ | $P4/mmm(123)$     | —                  | —     | —       | 7.49  | 7.48  | 60.6    | 6.41              | 7.17              | 0.615                   | 7.585       | 0.0  |  |
| CaS <sub>2</sub>  | PHX                       | —                 | $P\bar{6}m2(187)$ | $P4/mmm(123)$     | —                  | —     | —       | 9.02  | 9.01  | 58.4    | 8.58              | 7.66              | 0.388                   | 7.064       | 0.0  |  |
| CaSe <sub>2</sub> | THX                       | $P4/mmm(123)$     | $P\bar{6}m2(187)$ | —                 | 8.00               | 11.36 | 44.9    | 9.37  | 9.38  | 58.2    | —                 | —                 | 0.335                   | 1.768       | 0.0  |  |
| CaTe <sub>2</sub> | THX                       | $C2/m(12)$        | $P\bar{6}m2(187)$ | —                 | 11.55              | 9.01  | 49.8    | 9.86  | 9.90  | 59.2    | —                 | —                 | 0.410                   | 2.140       | 0.0  |  |
| ScF <sub>2</sub>  | PHX                       | —                 | $P\bar{6}m2(187)$ | $P\bar{1}(2)$     | —                  | —     | —       | 6.28  | 6.29  | 60.0    | 6.30              | 6.83              | 0.652                   | 0.827       | 4.0  |  |
| ScCl <sub>2</sub> | HTX                       | $C2/m(12)$        | $P\bar{6}m2(187)$ | —                 | 7.28               | 7.28  | 59.7    | 7.11  | 7.11  | 59.9    | —                 | —                 | 0.085                   | 2.970       | 0.7  |  |
| SeBr <sub>2</sub> | HTX                       | $P\bar{3}m1(164)$ | $P\bar{6}m2(187)$ | —                 | 7.61               | 7.61  | 59.4    | 7.43  | 7.42  | 59.9    | —                 | —                 | 0.156                   | 2.274       | 0.0  |  |
| ScCl <sub>2</sub> | THX                       | $P\bar{3}m1(164)$ | $P\bar{6}m2(187)$ | —                 | 8.16               | 8.16  | 59.9    | 8.00  | 7.99  | 59.9    | —                 | —                 | 0.125                   | 0.956       | 0.0  |  |
| SeHg <sub>2</sub> | THX                       | $P4/mmm(123)$     | $P\bar{6}m2(187)$ | —                 | 6.60               | 9.37  | 44.8    | 7.03  | 6.76  | 58.3    | —                 | —                 | 0.457                   | 3.630       | 0.0  |  |
| TiN <sub>2</sub>  | HXX                       | —                 | $P\bar{6}m2(187)$ | —                 | —                  | —     | —       | 6.50  | 6.52  | 60.3    | —                 | —                 | 1.634                   | 7.641       | —    |  |
| TiF <sub>2</sub>  | HXX                       | —                 | $P\bar{6}m2(187)$ | —                 | —                  | —     | —       | 5.70  | 5.69  | 60.0    | —                 | —                 | 2.451                   | 2.491       | —    |  |
| TiCl <sub>2</sub> | HPX                       | —                 | $P\bar{6}m2(187)$ | $P2_1/m(11)$      | —                  | —     | —       | 6.55  | 6.55  | 59.9    | 6.51              | 6.71              | 0.179                   | 1.369       | —    |  |
| TiBr <sub>2</sub> | HPT                       | $P2_1/m(11)$      | $P\bar{6}m2(187)$ | —                 | 7.36               | 7.64  | 58.7    | 6.94  | 6.93  | 60.0    | 9.56              | 6.77              | 0.670                   | 0.720       | 0.0  |  |
| VF <sub>2</sub>   | PHX                       | —                 | $P\bar{6}m2(187)$ | $P1(1)$           | —                  | —     | —       | 7.25  | 7.25  | 60.0    | 7.26              | 6.71              | 0.214                   | 1.818       | —    |  |
| VSe <sub>2</sub>  | HPT                       | $P\bar{3}m1(164)$ | $P\bar{6}m2(187)$ | $P\bar{3}m1(164)$ | 6.35               | 6.34  | 59.9    | 6.34  | 6.34  | 60.0    | 6.34              | 6.34              | 0.327                   | 0.329       | 1.9  |  |
| VAs <sub>2</sub>  | HTX                       | $C2/m(12)$        | $P\bar{6}m2(187)$ | —                 | 8.60               | 8.63  | 42.2    | 7.50  | 7.48  | 59.8    | —                 | —                 | 0.205                   | 1.563       | 5.1  |  |
| VSe <sub>2</sub>  | HPT                       | $P\bar{3}m1(164)$ | $P\bar{6}m2(187)$ | $P\bar{3}m1(164)$ | 6.61               | 6.61  | 59.9    | 6.64  | 6.63  | 59.9    | 6.61              | 6.60              | 0.333                   | 0.335       | 2.3  |  |
| VTe <sub>2</sub>  | PTH                       | $P2_1/m(11)$      | $P\bar{6}m2(187)$ | $P2_1/m(11)$      | 7.42               | 7.45  | 57.1    | 7.26  | 7.25  | 59.9    | 7.49              | 7.50              | 0.062                   | 0.215       | 5.3  |  |
| CrO <sub>2</sub>  | HPT                       | $P\bar{3}m1(164)$ | $P\bar{6}m2(187)$ | $P\bar{3}m1(164)$ | 5.74               | 5.73  | 60.0    | 5.23  | 5.23  | 60.0    | 5.73              | 5.73              | 0.416                   | 0.437       | 8.0  |  |
| CrS <sub>2</sub>  | HXX                       | —                 | $P\bar{6}m2(187)$ | —                 | —                  | —     | —       | 6.08  | 6.08  | 59.9    | —                 | —                 | 1.347                   | 1.351       | —    |  |
| CrSe <sub>2</sub> | TPH                       | $P2_1/m(11)$      | $P\bar{6}m2(187)$ | $P\bar{3}m1(164)$ | 6.86               | 6.81  | 59.5    | 6.76  | 6.75  | 59.8    | 6.81              | 6.87              | 0.016                   | 0.811       | 8.6  |  |
| MnP <sub>2</sub>  | PHT                       | $C2/m(12)$        | $P\bar{6}m2(187)$ | $C2/m(12)$        | 8.01               | 8.01  | 42.7    | 7.33  | 7.36  | 58.7    | 6.80              | 6.61              | 0.219                   | 0.766       | 10.0 |  |
| FeF <sub>2</sub>  | TPH                       | $P\bar{3}m1(164)$ | $P\bar{6}m2(187)$ | $P\bar{3}m1(164)$ | 6.35               | 6.39  | 59.6    | 5.85  | 5.86  | 59.7    | 6.33              | 6.34              | 0.001                   | 0.566       | 16.0 |  |
| FeS <sub>2</sub>  | THX                       | $P\bar{3}m1(164)$ | $P\bar{6}m2(187)$ | —                 | 6.37               | 6.40  | 60.2    | 6.31  | 6.30  | 60.0    | —                 | —                 | 0.666                   | 1.421       | 7.1  |  |
| FeSe <sub>2</sub> | PTH                       | $C2/m(12)$        | $P\bar{6}m2(187)$ | $Cm(8)$           | 6.60               | 6.60  | 59.7    | 6.60  | 6.58  | 59.7    | 6.63              | 6.71              | 0.037                   | 0.674       | 3.9  |  |
| FePd <sub>2</sub> | HTX                       | $Cmnm(65)$        | $P\bar{6}m2(187)$ | —                 | 5.54               | 8.18  | 41.8    | 5.48  | 5.48  | 59.9    | —                 | —                 | 0.217                   | 1.393       | 15.4 |  |
| GeGe <sub>2</sub> | HPT                       | $P\bar{3}m1(164)$ | $P\bar{6}m2(187)$ | $P\bar{3}m1(164)$ | 7.47               | 7.51  | 59.4    | 6.82  | 6.85  | 59.7    | 7.46              | 7.49              | 0.008                   | 0.030       | 0.0  |  |
| GePd <sub>2</sub> | PTH                       | —                 | $P\bar{6}m2(187)$ | $P1(1)$           | —                  | —     | —       | 7.72  | 7.73  | 60.0    | 8.18              | 6.15              | 0.126                   | 1.722       | —    |  |
| GeSn <sub>2</sub> | PTH                       | $P2_1/m(11)$      | $P\bar{6}m2(187)$ | $P2_1/m(11)$      | 7.57               | 7.59  | 45.3    | 6.11  | 6.11  | 59.9    | 5.78              | 7.27              | 0.230                   | 0.630       | 0.0  |  |
| GePt <sub>2</sub> | HXX                       | —                 | $P\bar{6}m2(187)$ | —                 | —                  | —     | —       | 8.21  | 8.23  | 60.0    | —                 | —                 | 0.915                   | 1.077       | —    |  |
| SeCa <sub>2</sub> | THX                       | $P\bar{3}m1(164)$ | $P\bar{6}m2(187)$ | —                 | 8.06               | 8.06  | 60.0    | 8.00  | 7.99  | 59.8    | —                 | —                 | 0.534                   | 1.206       | 0.0  |  |
| SeSr <sub>2</sub> | THX                       | $P2_1/m(11)$      | $P\bar{6}m2(187)$ | $P2_1/m(11)$      | 8.11               | 8.12  | 52.2    | 6.98  | 6.97  | 60.0    | 8.12              | 8.12              | 0.003                   | 0.776       | 0.0  |  |
| SeY <sub>2</sub>  | THX                       | $P\bar{3}m1(164)$ | $P\bar{6}m2(187)$ | —                 | 8.59               | 8.58  | 59.5    | 8.53  | 8.53  | 59.4    | —                 | —                 | 0.726                   | 2.660       | 0.0  |  |
| SeZn <sub>2</sub> | HPT                       | $P\bar{3}m1(164)$ | $P\bar{6}m2(187)$ | $P2_1/m(11)$      | 7.66               | 7.65  | 60.0    | 7.39  | 7.38  | 59.9    | 7.53              | 8.63              | 0.058                   | 0.150       | 0.0  |  |
| SeTl <sub>2</sub> | HTX                       | $P\bar{3}m1(164)$ | $P\bar{6}m2(187)$ | —                 | 8.13               | 8.11  | 60.6    | 7.98  | 7.97  | 60.6    | —                 | —                 | 0.285                   | 2.427       | 0.0  |  |
| BrK <sub>2</sub>  | PTH                       | $P\bar{3}m1(164)$ | $P\bar{6}m2(187)$ | $P\bar{3}m1(164)$ | 9.00               | 9.00  | 58.8    | 8.70  | 8.70  | 58.1    | 8.99              | 8.98              | 0.005                   | 0.055       | 0.0  |  |
| BrCa <sub>2</sub> | THP                       | $P\bar{3}m1(164)$ | $P\bar{6}m2(187)$ | $P2_1/m(11)$      | 9.59               | 9.57  | 58.4    | 9.58  | 9.55  | 56.4    | 11.19             | 11.15             | 0.245                   | 0.281       | 0.0  |  |
| BrSr <sub>2</sub> | THX                       | $P\bar{3}m1(164)$ | $P\bar{6}m2(187)$ | —                 | 7.79               | 7.79  | 59.7    | 7.77  | 7.77  | 59.7    | —                 | —                 | 0.200                   | 2.747       | 0.0  |  |
| BrBa <sub>2</sub> | THX                       | $P\bar{3}m1(164)$ | $P\bar{6}m2(187)$ | $P4m2(115)$       | 8.38               | 8.38  | 59.6    | 8.30  | 8.30  | 59.7    | —                 | —                 | 0.198                   | 1.454       | 0.0  |  |
| RbBa <sub>2</sub> | HPT                       | $P\bar{3}m1(164)$ | $P\bar{6}m2(187)$ | —                 | 10.65              | 10.61 | 59.4    | 10.61 | 10.59 | 59.4    | 13.20             | 13.24             | 0.309                   | 0.629       | 0.0  |  |
| RbF <sub>2</sub>  | THX                       | $P4/mmm(123)$     | $P\bar{6}m2(187)$ | —                 | 8.85               | 8.85  | 59.8    | 8.72  | 8.72  | 59.7    | —                 | —                 | 0.055                   | 3.475       | 0.0  |  |
|                   |                           |                   |                   |                   | 7.81               | 11.09 | 44.7    | 9.37  | 9.36  | 57.0    | —                 | —                 | 0.508                   | 1.140       | 4.0  |  |

(Continued on next page)

(Continued from previous page)

Table 5: List of  $P\bar{6}m2(187)$ 

| species           | Initial structure indices | space group       |                   |               | lattice parameters |       |       |                |       |       | relative energy |                |                   | spin moment       |     |     |     |
|-------------------|---------------------------|-------------------|-------------------|---------------|--------------------|-------|-------|----------------|-------|-------|-----------------|----------------|-------------------|-------------------|-----|-----|-----|
|                   |                           | T                 | H                 | P             | a [Å]              | b [Å] | c [Å] | $\gamma$ [deg] | a [Å] | b [Å] | c [Å]           | $\gamma$ [deg] | $\Delta E_1$ [eV] | $\Delta E_2$ [eV] | T   | H   | P   |
| RbCl <sub>2</sub> | THX                       | $P4/mmm(123)$     | $P\bar{6}m2(187)$ | —             | 8.99               | 12.73 | 45.1  | 56.7           | 10.87 | 10.87 | 56.7            | —              | 0.349             | 1.122             | 4.0 | 4.0 | —   |
| RbBr <sub>2</sub> | THX                       | $P4/mmm(123)$     | $P\bar{6}m2(187)$ | —             | 9.35               | 13.21 | 44.9  | 57.6           | 11.82 | 11.16 | 57.6            | —              | 0.346             | 1.251             | 4.0 | 4.0 | —   |
| SrSe <sub>2</sub> | HXX                       | —                 | $P\bar{6}m2(187)$ | —             | 9.99               | 9.99  | 57.9  | 57.9           | 9.99  | 9.99  | 57.9            | —              | 2.071             | 5.736             | —   | 0.0 | —   |
| SrAu <sub>2</sub> | TPH                       | $P6/mmm(191)$     | $P\bar{6}m2(187)$ | $Cmnm(65)$    | 10.80              | 10.84 | 60.1  | 60.0           | 8.49  | 8.59  | 60.0            | 53.5           | 0.060             | 0.644             | 0.0 | 0.0 | —   |
| YFe <sub>2</sub>  | HPX                       | —                 | $P\bar{6}m2(187)$ | $P3m1(164)$   | 6.85               | 6.85  | 60.0  | 60.0           | 6.85  | 6.85  | 60.0            | 60.1           | 0.756             | 0.865             | 4.0 | 3.6 | —   |
| YCl <sub>2</sub>  | HPX                       | —                 | $P\bar{6}m2(187)$ | $P3m1(156)$   | 7.53               | 7.52  | 59.8  | 59.8           | 7.53  | 7.52  | 59.8            | 60.0           | 0.685             | 0.867             | 3.9 | 0.0 | —   |
| YBr <sub>2</sub>  | HPT                       | $P\bar{3}m1(164)$ | $P\bar{6}m2(187)$ | —             | 7.91               | 7.90  | 58.4  | —              | 7.77  | 7.77  | 59.6            | 60.4           | 0.601             | 0.698             | 0.0 | 3.9 | 0.9 |
| YI <sub>2</sub>   | HPT                       | $P3m1(164)$       | $P\bar{6}m2(187)$ | $C2/m(12)$    | 8.39               | 8.39  | 58.9  | —              | 8.25  | 8.25  | 59.6            | 60.3           | 0.339             | 0.412             | 0.0 | 3.7 | 0.8 |
| ZrN <sub>2</sub>  | HPX                       | —                 | $P\bar{6}m2(187)$ | $P1(1)$       | 7.01               | 7.04  | 60.2  | 60.2           | 7.01  | 7.04  | 60.2            | 69.1           | 0.260             | 7.170             | 0.0 | 0.0 | 0.0 |
| ZrF <sub>2</sub>  | HXX                       | —                 | $P\bar{6}m2(187)$ | —             | —                  | —     | —     | —              | 8.23  | 6.23  | 60.0            | —              | 0.876             | 0.892             | —   | 0.0 | —   |
| ZrP <sub>2</sub>  | HXX                       | —                 | $P\bar{6}m2(187)$ | —             | —                  | —     | —     | —              | 8.14  | 8.13  | 59.8            | —              | 1.562             | 9.368             | —   | 0.0 | —   |
| ZrCl <sub>2</sub> | HTP                       | $P2_1/m(11)$      | $P\bar{6}m2(187)$ | $P2_1/m(11)$  | 7.11               | 6.71  | 61.8  | 60.1           | 6.84  | 6.84  | 60.1            | 56.3           | 0.436             | 0.440             | 0.0 | 0.0 | 0.0 |
| ZrBr <sub>2</sub> | HTP                       | $P2_1/m(11)$      | $P\bar{6}m2(187)$ | $P2_1/m(11)$  | 7.01               | 7.40  | 61.6  | 60.1           | 7.13  | 7.13  | 60.1            | 56.6           | 0.024             | 0.028             | 0.0 | 0.0 | 0.0 |
| ZrI <sub>2</sub>  | TPH                       | $P2_1/m(11)$      | $P\bar{6}m2(187)$ | $P2_1/m(11)$  | 7.57               | 7.88  | 61.3  | 60.0           | 7.69  | 7.69  | 60.0            | 61.3           | 0.035             | 0.337             | 0.0 | 0.0 | 0.0 |
| NbO <sub>2</sub>  | THX                       | $C2/m(12)$        | $P\bar{6}m2(187)$ | —             | 6.21               | 6.18  | 60.2  | 60.4           | 6.01  | 5.96  | 60.4            | —              | 0.651             | 1.777             | 0.0 | 0.0 | —   |
| NbP <sub>2</sub>  | THX                       | $P1(2)$           | $P\bar{6}m2(187)$ | —             | 7.57               | 7.86  | 44.9  | —              | 7.80  | 7.80  | 57.8            | —              | 0.163             | 1.567             | 0.0 | 0.0 | —   |
| NbS <sub>2</sub>  | HPT                       | $P3m1(164)$       | $P\bar{6}m2(187)$ | $C2/m(12)$    | 6.77               | 6.77  | 60.0  | —              | 6.72  | 6.73  | 59.7            | 55.4           | 0.379             | 0.410             | 0.0 | 0.0 | 0.0 |
| NbSe <sub>2</sub> | HPT                       | $P3m1(164)$       | $P\bar{6}m2(187)$ | $C2/m(12)$    | 6.96               | 6.96  | 59.9  | —              | 6.95  | 6.94  | 60.0            | 74.3           | 0.171             | 0.417             | 0.0 | 0.0 | 0.0 |
| NbTe <sub>2</sub> | HTX                       | $P2_1/m(11)$      | $P\bar{6}m2(187)$ | —             | 7.52               | 7.51  | 54.3  | —              | 7.40  | 7.40  | 60.0            | —              | 0.124             | 1.416             | 0.0 | 0.0 | —   |
| MoO <sub>2</sub>  | HXX                       | —                 | $P\bar{6}m2(187)$ | —             | —                  | —     | —     | —              | 5.69  | 5.68  | 60.0            | —              | 2.347             | 2.376             | —   | 0.0 | —   |
| MoS <sub>2</sub>  | HXX                       | —                 | $P\bar{6}m2(187)$ | —             | —                  | —     | —     | —              | 6.39  | 6.39  | 60.0            | —              | 2.625             | 3.668             | —   | 0.0 | —   |
| MoSe <sub>2</sub> | HXX                       | —                 | $P\bar{6}m2(187)$ | —             | —                  | —     | —     | —              | 6.65  | 6.65  | 60.1            | —              | 1.444             | 1.489             | —   | 0.0 | —   |
| MoSb <sub>2</sub> | HXX                       | $C2/m(12)$        | $P\bar{6}m2(187)$ | —             | 9.19               | 9.19  | 42.4  | —              | 7.84  | 7.94  | 59.2            | —              | 0.638             | 7.676             | 0.0 | 0.0 | —   |
| MoTe <sub>2</sub> | THP                       | $P2_1/m(11)$      | $P\bar{6}m2(187)$ | $P2_1/m(11)$  | 7.29               | 7.28  | 57.3  | —              | 7.16  | 7.16  | 60.1            | 57.0           | 0.006             | 0.064             | 0.0 | 0.0 | 0.0 |
| TcN <sub>2</sub>  | PTH                       | $P1(1)$           | $P\bar{6}m2(187)$ | $Pc(7)$       | 6.34               | 6.09  | 59.0  | —              | 5.74  | 5.75  | 60.1            | 6.22           | 0.406             | 0.515             | 0.0 | 0.3 | 0.0 |
| TcSb <sub>2</sub> | HXX                       | —                 | $P\bar{6}m2(187)$ | —             | —                  | —     | —     | —              | 6.65  | 6.65  | 60.0            | —              | 3.596             | 11.384            | —   | 0.0 | —   |
| TcBi <sub>2</sub> | PHX                       | —                 | $P\bar{6}m2(187)$ | $P1(2)$       | —                  | —     | —     | —              | 6.89  | 6.88  | 60.1            | 46.4           | 0.659             | 4.313             | —   | 0.0 | 0.0 |
| RuPd <sub>2</sub> | HXX                       | —                 | $P\bar{6}m2(187)$ | —             | —                  | —     | —     | —              | 5.51  | 5.51  | 59.8            | —              | 6.269             | 7.276             | —   | 0.0 | —   |
| RhIn <sub>2</sub> | HXX                       | —                 | $P\bar{6}m2(187)$ | —             | —                  | —     | —     | —              | 6.43  | 6.38  | 58.1            | —              | 1.550             | 1.883             | —   | 0.0 | —   |
| PdSc <sub>2</sub> | HPT                       | $P3m1(164)$       | $P\bar{6}m2(187)$ | $P3m1(164)$   | 7.99               | 7.97  | 59.6  | —              | 6.91  | 6.93  | 60.1            | 60.0           | 0.376             | 0.382             | 0.0 | 0.0 | 0.0 |
| PdIn <sub>2</sub> | HXX                       | —                 | $P\bar{6}m2(187)$ | —             | —                  | —     | —     | —              | 6.36  | 6.35  | 60.1            | —              | 1.708             | 1.943             | —   | 0.0 | —   |
| PdAu <sub>2</sub> | HXX                       | —                 | $P\bar{6}m2(187)$ | —             | —                  | —     | —     | —              | 5.72  | 5.71  | 59.6            | —              | 5.169             | 5.185             | —   | 0.0 | —   |
| CdC <sub>3</sub>  | PTH                       | $C2/m(12)$        | $P\bar{6}m2(187)$ | $P2_1/m(11)$  | 8.05               | 8.07  | 59.1  | —              | 7.91  | 7.90  | 59.5            | 54.1           | 0.438             | 0.706             | 0.0 | 0.0 | 0.0 |
| CdBa <sub>2</sub> | HPT                       | $C2/m(12)$        | $P\bar{6}m2(187)$ | $P3m1(164)$   | 10.64              | 10.61 | 56.1  | —              | 9.24  | 9.19  | 58.5            | 60.1           | 0.497             | 0.549             | 0.0 | 0.0 | 0.0 |
| CdB <sub>2</sub>  | THX                       | $C2/m(12)$        | $P\bar{6}m2(187)$ | —             | 12.89              | 12.88 | 39.4  | —              | 9.20  | 9.20  | 58.2            | —              | 0.525             | 2.600             | 0.0 | 0.0 | —   |
| InTl <sub>2</sub> | HXX                       | —                 | $P\bar{6}m2(187)$ | —             | —                  | —     | —     | —              | 6.94  | 6.95  | 59.9            | —              | 3.251             | 4.456             | —   | 0.0 | —   |
| SnPb <sub>2</sub> | PHX                       | —                 | $P\bar{6}m2(187)$ | $P1(2)$       | —                  | —     | —     | —              | 9.08  | 9.09  | 59.6            | 49.2           | 0.438             | 1.695             | —   | 0.0 | 0.0 |
| TeCa <sub>2</sub> | THX                       | $P2_1/m(11)$      | $P\bar{6}m2(187)$ | —             | 8.45               | 9.16  | 62.8  | —              | 8.41  | 8.37  | 59.7            | —              | 0.767             | 0.919             | 0.0 | 0.0 | —   |
| TeSr <sub>2</sub> | THX                       | $P3m1(164)$       | $P\bar{6}m2(187)$ | $P2_1/m(11)$  | 8.91               | 8.95  | 60.3  | —              | 8.94  | 8.88  | 59.3            | —              | 0.500             | 2.067             | 0.0 | 0.0 | —   |
| TeTl <sub>2</sub> | HPT                       | $P3m1(164)$       | $P\bar{6}m2(187)$ | $P1(2)$       | 9.79               | 9.80  | 58.4  | —              | 9.28  | 9.32  | 58.4            | 58.2           | 0.032             | 0.034             | 0.0 | 0.0 | 0.0 |
| IK <sub>2</sub>   | TPH                       | $P2_1/m(11)$      | $P\bar{6}m2(187)$ | —             | 9.84               | 9.86  | 59.0  | —              | 10.00 | 9.98  | 56.2            | 90.0           | 0.041             | 0.189             | 0.0 | 0.0 | 0.0 |
| IST <sub>2</sub>  | THX                       | $P3m1(164)$       | $P\bar{6}m2(187)$ | —             | 8.54               | 8.55  | 59.8  | —              | 8.57  | 8.57  | 59.0            | —              | 0.115             | 1.645             | 0.0 | 0.0 | —   |
| BaN <sub>2</sub>  | HXX                       | —                 | $P\bar{6}m2(187)$ | —             | —                  | —     | —     | —              | 9.18  | 9.23  | 60.7            | —              | 19.750            | 19.780            | —   | 3.8 | —   |
| BaS <sub>2</sub>  | PHX                       | $P2_1/m(11)$      | $P\bar{6}m2(187)$ | $P4/mmm(123)$ | —                  | —     | —     | —              | 10.15 | 10.14 | 60.1            | 53.2           | 0.814             | 8.564             | —   | 0.0 | 0.0 |
| HfF <sub>2</sub>  | HTP                       | $P1(2)$           | $P\bar{6}m2(187)$ | $Pm(6)$       | 6.99               | 6.98  | 50.7  | —              | 6.08  | 6.08  | 59.9            | 64.7           | 0.463             | 0.726             | 0.0 | 0.0 | 0.0 |
| HfP <sub>2</sub>  | THX                       | —                 | $P\bar{6}m2(187)$ | —             | 8.16               | 7.93  | 48.6  | —              | 8.03  | 8.02  | 59.5            | —              | 0.106             | 1.575             | 0.0 | 0.0 | —   |
| HfCl <sub>2</sub> | HTP                       | $P2_1/m(11)$      | $P\bar{6}m2(187)$ | $P2_1/m(11)$  | 6.57               | 6.98  | 61.8  | —              | 6.69  | 6.69  | 60.2            | 56.1           | 0.536             | 0.536             | 0.0 | 0.0 | 0.0 |
| HfBr <sub>2</sub> | TPH                       | $P2_1/m(11)$      | $P\bar{6}m2(187)$ | $P2_1/m(11)$  | 6.88               | 7.28  | 61.8  | —              | 6.99  | 6.99  | 60.1            | 56.4           | 0.001             | 0.039             | 0.0 | 0.0 | 0.0 |
| HfI <sub>2</sub>  | PTH                       | $C2/m(12)$        | $P\bar{6}m2(187)$ | $P2_1/m(11)$  | 7.59               | 7.84  | 59.7  | —              | 7.56  | 7.56  | 59.8            | 57.3           | 0.231             | 0.516             | 0.0 | 0.0 | 0.0 |
| HfAu <sub>2</sub> | THX                       | $C2/m(12)$        | $P\bar{6}m2(187)$ | —             | 7.35               | 6.29  | 50.1  | —              | 6.18  | 6.19  | 60.1            | —              | 0.297             | 7.760             | 0.0 | 0.0 | —   |
| TaO <sub>2</sub>  | TPH                       | $C2/m(12)$        | $P\bar{6}m2(187)$ | $Pmnm(59)$    | 6.14               | 6.13  | 60.0  | —              | 5.95  | 5.92  | 60.4            | 60.2           | 0.239             | 0.595             | 0.0 | 0.0 | 0.0 |
| TaS <sub>2</sub>  | HTP                       | $P3m1(164)$       | $P\bar{6}m2(187)$ | $C2/m(12)$    | 6.76               | 6.76  | 60.1  | —              | 6.68  | 6.68  | 60.0            | 50.1           | 0.242             | 0.728             | 0.0 | 0.0 | 0.0 |
| TaSe <sub>2</sub> | HPT                       | $P3m1(164)$       | $P\bar{6}m2(187)$ | $P3m1(164)$   | 7.00               | 7.00  | 59.8  | —              | 6.94  | 6.94  | 60.0            | 59.9           | 0.282             | 0.284             | 0.0 | 0.0 | 0.0 |
| TaTe <sub>2</sub> | PTH                       | $P2_1/m(11)$      | $P\bar{6}m2(187)$ | $C2/m(12)$    | 7.50               | 7.50  | 54.7  | —              | 7.44  | 7.43  | 59.9            | 55.4           | 0.111             | 0.115             | 0.0 | 0.0 | 0.0 |
| WO <sub>2</sub>   | HXX                       | —                 | $P\bar{6}m2(187)$ | —             | —                  | —     | —     | —              | 5.70  | 5.70  | 60.0            | —              | 2.620             | 2.722             | —   | 0.0 | —   |
| WS <sub>2</sub>   | HXX                       | —                 | $P\bar{6}m2(187)$ | —             | —                  | —     | —     | —              | 6.40  | 6.40  | 60.0            | —              | 2.345             | 4.115             | —   | 0.0 | —   |
| WAs <sub>2</sub>  | HXX                       | —                 | $P\bar{6}m2(187)$ | —             | 7.39               | 7.43  | 60.2  | —              | 7.39  | 7.43  | 60.2            | —              | 2.084             | 10.262            | —   | 0.0 | —   |

(Continued on next page)



Table 6: List of *Amm2*(38)

| species           | Initial structure indices | space group         |                  | lattice parameters  |       |       |       |                |       |       |       |                |                   | relative energy   |      | spin moment |      |  |
|-------------------|---------------------------|---------------------|------------------|---------------------|-------|-------|-------|----------------|-------|-------|-------|----------------|-------------------|-------------------|------|-------------|------|--|
|                   |                           | T                   | H                | P                   | a [Å] | b [Å] | c [Å] | $\gamma$ [deg] | a [Å] | b [Å] | c [Å] | $\gamma$ [deg] | $\Delta E_1$ [eV] | $\Delta E_2$ [eV] | T    | H           | P    |  |
| LiLi <sub>2</sub> | HTX                       | <i>Cmmm</i> (65)    | <i>Amm2</i> (38) | —                   | 5.97  | 7.76  | 49.0  | 6.03           | 6.52  | 57.8  | —     | —              | 0.160             | 4.548             | 0.0  | 0.0         | —    |  |
| LiMg <sub>2</sub> | THX                       | <i>C2/m</i> (12)    | <i>Amm2</i> (38) | —                   | 6.15  | 6.61  | 56.9  | 6.60           | 6.17  | 57.5  | —     | —              | 0.152             | 3.972             | 0.0  | 0.0         | —    |  |
| LiCs <sub>2</sub> | HXX                       | —                   | <i>Amm2</i> (38) | —                   | —     | —     | —     | 12.59          | 12.52 | 46.3  | —     | —              | 0.865             | 1.607             | —    | 0.0         | —    |  |
| BeMg <sub>2</sub> | THX                       | <i>P1</i> (2)       | <i>Amm2</i> (38) | —                   | 6.15  | 7.68  | 52.1  | 6.11           | 6.31  | 60.8  | —     | —              | 0.494             | 6.478             | 0.0  | 0.0         | —    |  |
| BeSi <sub>2</sub> | HTX                       | <i>C2/m</i> (12)    | <i>Amm2</i> (38) | —                   | 7.49  | 7.49  | 39.3  | 7.47           | 7.46  | 39.7  | —     | —              | 0.581             | 4.407             | 0.0  | 0.0         | —    |  |
| BeGe <sub>2</sub> | HTX                       | <i>P3m1</i> (164)   | <i>Amm2</i> (38) | —                   | 7.45  | 7.45  | 59.9  | 7.70           | 7.69  | 41.5  | —     | —              | 0.675             | 1.290             | 0.0  | 0.0         | —    |  |
| BeRb <sub>2</sub> | THX                       | <i>P3m1</i> (164)   | <i>Amm2</i> (38) | —                   | 10.74 | 10.74 | 56.9  | 10.59          | 10.59 | 49.0  | —     | —              | 0.542             | 2.225             | 0.0  | 0.0         | —    |  |
| BeAs <sub>2</sub> | THX                       | <i>P4/mmm</i> (123) | <i>Amm2</i> (38) | —                   | 8.01  | 5.65  | 44.8  | 6.20           | 5.67  | 56.2  | —     | —              | 0.552             | 5.148             | 0.0  | 0.0         | —    |  |
| BeCs <sub>2</sub> | THX                       | <i>P3m1</i> (164)   | <i>Amm2</i> (38) | —                   | 10.99 | 10.99 | 59.2  | 11.24          | 11.25 | 50.2  | —     | —              | 0.787             | 2.815             | 0.0  | 0.0         | —    |  |
| BePb <sub>2</sub> | PTH                       | <i>P3m1</i> (164)   | <i>Amm2</i> (38) | <i>P3m1</i> (164)   | 8.34  | 8.34  | 59.2  | 7.87           | 7.87  | 52.1  | —     | —              | 0.012             | 0.416             | 0.0  | 0.0         | 0.0  |  |
| BB <sub>2</sub>   | THX                       | <i>C2/m</i> (12)    | <i>Amm2</i> (38) | —                   | 5.12  | 5.68  | 33.6  | 5.37           | 4.94  | 35.3  | —     | —              | 0.713             | 1.914             | 0.0  | 0.0         | —    |  |
| BA <sub>2</sub>   | HTX                       | <i>C2/m</i> (12)    | <i>Amm2</i> (38) | —                   | 6.48  | 6.65  | 59.2  | 6.66           | 6.34  | 45.2  | —     | —              | 0.492             | 2.832             | 0.0  | 0.0         | —    |  |
| BK <sub>2</sub>   | THX                       | <i>P3m1</i> (164)   | <i>Amm2</i> (38) | —                   | 10.11 | 10.12 | 57.7  | 9.22           | 9.21  | 52.3  | —     | —              | 0.565             | 2.933             | 11.1 | 3.4         | —    |  |
| MgRb <sub>2</sub> | THX                       | <i>C2/m</i> (12)    | <i>Amm2</i> (38) | —                   | 9.63  | 9.64  | 33.2  | 9.07           | 9.07  | 33.3  | —     | —              | 0.102             | 1.958             | 3.6  | 0.0         | —    |  |
| MgSn <sub>2</sub> | HXX                       | —                   | <i>Amm2</i> (38) | —                   | —     | —     | —     | 9.89           | 9.95  | 37.1  | —     | —              | 1.742             | 2.456             | —    | 0.0         | —    |  |
| MgBa <sub>2</sub> | PTH                       | <i>C2/m</i> (12)    | <i>Amm2</i> (38) | <i>P1</i> (2)       | 11.05 | 8.90  | 51.5  | 8.84           | 8.86  | 59.6  | 12.04 | 11.07          | 0.101             | 0.322             | 0.0  | 0.0         | 0.0  |  |
| AlSn <sub>2</sub> | HXX                       | —                   | <i>Amm2</i> (38) | —                   | —     | —     | —     | 8.68           | 8.68  | 45.5  | —     | —              | 1.491             | 5.250             | —    | 0.0         | —    |  |
| AlPb <sub>2</sub> | HXX                       | —                   | <i>Amm2</i> (38) | —                   | —     | —     | —     | 8.86           | 8.86  | 46.7  | —     | —              | 1.361             | 2.072             | —    | 0.0         | —    |  |
| SiO <sub>2</sub>  | THP                       | <i>P3m1</i> (164)   | <i>Amm2</i> (38) | <i>Amm2</i> (38)    | 5.41  | 5.41  | 60.0  | 5.41           | 5.41  | 60.0  | 8.79  | 4.95           | 0.010             | 0.562             | 0.0  | 0.0         | 0.0  |  |
| SiCl <sub>2</sub> | TPH                       | <i>P1</i> (2)       | <i>Amm2</i> (38) | <i>P1</i> (2)       | 7.11  | 9.49  | 72.3  | 8.64           | 8.69  | 86.9  | 8.82  | 9.42           | 0.153             | 0.713             | 0.0  | 0.0         | 0.0  |  |
| SiK <sub>2</sub>  | HXX                       | —                   | <i>Amm2</i> (38) | —                   | —     | —     | —     | 9.75           | 10.41 | 46.2  | —     | —              | 3.611             | 3.632             | —    | 0.0         | —    |  |
| SiRb <sub>2</sub> | HXX                       | —                   | <i>Amm2</i> (38) | —                   | —     | —     | —     | 10.13          | 10.81 | 46.4  | —     | —              | 3.591             | 5.384             | —    | 0.0         | —    |  |
| Si <sub>2</sub>   | HPT                       | <i>P1</i> (1)       | <i>Amm2</i> (38) | <i>P1</i> (2)       | 7.91  | 9.57  | 75.7  | 7.96           | 9.56  | 64.8  | 9.98  | 12.93          | 0.019             | 0.038             | 0.0  | 0.0         | 0.0  |  |
| ClSn <sub>2</sub> | PHX                       | —                   | <i>Amm2</i> (38) | <i>P1</i> (1)       | —     | —     | —     | 6.81           | 6.81  | 59.8  | 8.91  | 9.05           | 0.211             | 1.219             | —    | 0.0         | 0.0  |  |
| ClCs <sub>2</sub> | TPH                       | <i>P3m1</i> (164)   | <i>Amm2</i> (38) | <i>P1</i> (1)       | 10.58 | 10.58 | 56.8  | 10.64          | 10.65 | 54.1  | 11.64 | 10.89          | 0.183             | 0.436             | 0.0  | 0.0         | 0.0  |  |
| ClTi <sub>2</sub> | THX                       | <i>P2m1</i> (164)   | <i>Amm2</i> (38) | —                   | 7.71  | 7.69  | 57.7  | 7.69           | 7.67  | 55.8  | —     | —              | 0.235             | 2.120             | 0.0  | 0.0         | —    |  |
| KI <sub>2</sub>   | TPH                       | <i>P2/c</i> (13)    | <i>Amm2</i> (38) | <i>P2/m</i> (10)    | 10.94 | 10.95 | 53.3  | 11.37          | 11.37 | 56.3  | 13.32 | 13.26          | 0.171             | 0.227             | 4.0  | 4.0         | 0.0  |  |
| KBa <sub>2</sub>  | HXX                       | —                   | <i>Amm2</i> (38) | —                   | —     | —     | —     | 14.40          | 14.44 | 34.8  | —     | —              | 1.099             | 1.172             | —    | 0.0         | —    |  |
| CaHg <sub>2</sub> | HPT                       | <i>C2/m</i> (12)    | <i>Amm2</i> (38) | <i>P6/mmm</i> (191) | 11.48 | 11.50 | 37.9  | 10.67          | 10.75 | 41.0  | 10.98 | 10.99          | 0.088             | 0.094             | 0.0  | 0.0         | 0.0  |  |
| Vb <sub>2</sub>   | PTH                       | <i>C2/m</i> (12)    | <i>Amm2</i> (38) | <i>C2/m</i> (12)    | 9.16  | 9.17  | 43.4  | 8.88           | 8.90  | 43.6  | 9.19  | 9.18           | 0.058             | 0.300             | 8.3  | 10.3        | 8.4  |  |
| VBi <sub>2</sub>  | PTH                       | <i>C2/m</i> (12)    | <i>Amm2</i> (38) | <i>C2/m</i> (12)    | 9.46  | 9.46  | 42.2  | 9.12           | 9.13  | 44.1  | 9.48  | 9.46           | 0.004             | 0.007             | 9.9  | 10.4        | 10.0 |  |
| CrCs <sub>2</sub> | THX                       | <i>P3m1</i> (164)   | <i>Amm2</i> (38) | —                   | 11.35 | 11.40 | 58.3  | 11.95          | 11.92 | 48.4  | —     | —              | 0.599             | 2.505             | 22.1 | 21.2        | —    |  |
| CrBi <sub>2</sub> | HPT                       | <i>C2/m</i> (12)    | <i>Amm2</i> (38) | <i>C2/m</i> (12)    | 9.44  | 9.44  | 42.3  | 9.27           | 9.30  | 42.3  | 9.44  | 9.46           | 0.055             | 0.058             | 14.2 | 14.6        | 14.2 |  |
| FeP <sub>2</sub>  | PTH                       | <i>C2/m</i> (12)    | <i>Amm2</i> (38) | <i>P1</i> (2)       | 7.74  | 7.75  | 42.3  | 7.31           | 7.34  | 50.7  | 7.38  | 7.68           | 0.161             | 0.538             | 6.3  | 8.1         | 1.9  |  |
| FeAs <sub>2</sub> | THX                       | <i>C2/m</i> (12)    | <i>Amm2</i> (38) | —                   | 8.04  | 8.10  | 43.2  | 7.62           | 7.64  | 50.7  | —     | —              | 0.444             | 7.230             | 7.7  | 9.2         | —    |  |
| CoIr <sub>2</sub> | HTX                       | <i>C2/m</i> (12)    | <i>Amm2</i> (38) | —                   | 8.38  | 8.39  | 35.6  | 8.23           | 8.24  | 35.8  | —     | —              | 0.363             | 0.833             | 5.0  | 6.3         | —    |  |
| NiAs <sub>2</sub> | HTX                       | <i>C2/m</i> (12)    | <i>Amm2</i> (38) | —                   | 8.09  | 7.79  | 43.3  | 7.94           | 7.94  | 41.8  | —     | —              | 0.030             | 2.912             | 0.0  | 0.0         | —    |  |
| NiIr <sub>2</sub> | HPT                       | <i>C2/m</i> (12)    | <i>Amm2</i> (38) | <i>Pmnm</i> (59)    | 8.49  | 8.49  | 34.7  | 8.41           | 8.44  | 34.6  | 8.69  | 8.69           | 0.275             | 0.300             | 0.0  | 0.0         | 2.6  |  |
| NiBi <sub>2</sub> | HXX                       | —                   | <i>Amm2</i> (38) | —                   | —     | —     | —     | 8.51           | 6.89  | 50.3  | —     | —              | 1.937             | 1.956             | —    | 0.0         | —    |  |
| GaSn <sub>2</sub> | HXX                       | —                   | <i>Amm2</i> (38) | —                   | —     | —     | —     | 9.90           | 9.94  | 36.7  | —     | —              | 3.145             | 5.782             | —    | 0.2         | —    |  |
| GeAl <sub>2</sub> | HXX                       | —                   | <i>Amm2</i> (38) | —                   | —     | —     | —     | 8.11           | 8.10  | 39.7  | —     | —              | 1.794             | 2.666             | —    | 0.0         | —    |  |
| GeK <sub>2</sub>  | HXX                       | —                   | <i>Amm2</i> (38) | —                   | —     | —     | —     | 10.57          | 9.90  | 46.0  | —     | —              | 2.766             | 3.054             | —    | 0.0         | —    |  |
| GeRb <sub>2</sub> | HXX                       | —                   | <i>Amm2</i> (38) | —                   | —     | —     | —     | 10.96          | 10.28 | 46.3  | —     | —              | 2.719             | 4.539             | —    | 0.0         | —    |  |
| GeCd <sub>2</sub> | HTX                       | <i>P3m1</i> (164)   | <i>Amm2</i> (38) | —                   | 9.08  | 9.08  | 59.8  | 8.87           | 8.84  | 38.0  | —     | —              | 0.761             | 0.863             | 0.0  | 0.0         | —    |  |
| GeCs <sub>2</sub> | PTH                       | <i>P3m1</i> (164)   | <i>Amm2</i> (38) | <i>P3m1</i> (164)   | 11.87 | 11.83 | 58.2  | 11.13          | 11.12 | 48.6  | 11.60 | 11.60          | 0.015             | 0.776             | 8.0  | 5.3         | 8.0  |  |
| BrRb <sub>2</sub> | PTH                       | <i>P3m1</i> (164)   | <i>Amm2</i> (38) | <i>P2/m</i> (11)    | 10.19 | 10.17 | 58.1  | 10.14          | 10.12 | 56.1  | 11.31 | 11.73          | 0.241             | 0.304             | 0.0  | 0.0         | 0.0  |  |
| BrTi <sub>2</sub> | PTH                       | <i>P3m1</i> (164)   | <i>Amm2</i> (38) | <i>P1</i> (2)       | 7.88  | 7.87  | 58.6  | 8.04           | 8.06  | 54.7  | 9.87  | 8.39           | 0.056             | 0.449             | 0.0  | 0.0         | 0.0  |  |
| RbSr <sub>2</sub> | HTP                       | <i>P6/mmm</i> (191) | <i>Amm2</i> (38) | <i>P6/mmm</i> (191) | 15.62 | 15.61 | 60.1  | 16.32          | 16.39 | 30.0  | 15.95 | 15.95          | 0.754             | 0.786             | 0.0  | 0.0         | 0.0  |  |
| RbBa <sub>2</sub> | HXX                       | —                   | <i>Amm2</i> (38) | —                   | —     | —     | —     | 15.30          | 15.34 | 33.0  | —     | —              | 0.831             | 0.907             | —    | 0.0         | —    |  |
| SrSr <sub>2</sub> | HXX                       | —                   | <i>Amm2</i> (38) | —                   | —     | —     | —     | 8.55           | 14.45 | 31.6  | —     | —              | 6.433             | 6.440             | —    | 0.0         | —    |  |
| MoTi <sub>2</sub> | HXX                       | —                   | <i>Amm2</i> (38) | —                   | —     | —     | —     | 8.14           | 9.52  | 27.5  | —     | —              | 12.878            | 12.901            | —    | 0.0         | —    |  |
| TcSi <sub>2</sub> | THX                       | <i>C2/m</i> (12)    | <i>Amm2</i> (38) | —                   | 8.59  | 8.59  | 40.4  | 7.47           | 7.49  | 51.3  | —     | —              | 0.278             | 0.964             | 0.0  | 0.0         | —    |  |
| TcP <sub>2</sub>  | HXX                       | —                   | <i>Amm2</i> (38) | —                   | —     | —     | —     | 7.28           | 7.28  | 52.2  | —     | —              | 1.228             | 1.912             | —    | 0.0         | —    |  |
| RhGa <sub>2</sub> | THX                       | <i>C2/m</i> (12)    | <i>Amm2</i> (38) | —                   | 7.96  | 7.94  | 42.9  | 7.56           | 7.50  | 45.0  | —     | —              | 0.346             | 4.161             | 0.0  | 0.0         | —    |  |
| PdAs <sub>2</sub> | HXX                       | —                   | <i>Amm2</i> (38) | —                   | —     | —     | —     | 9.09           | 8.78  | 37.4  | —     | —              | 2.195             | 7.320             | —    | 0.0         | —    |  |
| PdSb <sub>2</sub> | THX                       | <i>C2/m</i> (12)    | <i>Amm2</i> (38) | —                   | 8.93  | 8.93  | 54.1  | 8.87           | 8.87  | 42.2  | —     | —              | 0.077             | 5.364             | 0.0  | 0.0         | —    |  |
| PdIr <sub>2</sub> | PHX                       | —                   | <i>Amm2</i> (38) | <i>Pmnm</i> (59)    | —     | —     | —     | 9.21           | 9.21  | 32.4  | 8.73  | 8.72           | 0.795             | 1.191             | —    | 0.0         | 0.0  |  |

(Continued on next page)

Table 6: List of  $Amm2(38)$ 

| species           | Initial structure indices | space group       |            |                   | lattice parameters |       |       |                |       |       | relative energy |                |                   | spin moment       |      |      |
|-------------------|---------------------------|-------------------|------------|-------------------|--------------------|-------|-------|----------------|-------|-------|-----------------|----------------|-------------------|-------------------|------|------|
|                   |                           | T                 | H          | P                 | a [Å]              | b [Å] | c [Å] | $\gamma$ [deg] | a [Å] | b [Å] | c [Å]           | $\gamma$ [deg] | $\Delta E_1$ [eV] | $\Delta E_2$ [eV] | T    | H    |
| PdTi <sub>2</sub> | HTP                       | $P\bar{3}m1(164)$ | $Amm2(38)$ | $C2/m(12)$        | 8.85               | 8.83  | 56.7  | 44.7           | 9.41  | 9.42  | 44.6            | 0.489          | 0.506             | 0.0               | 0.0  | 0.0  |
| AgAl <sub>2</sub> | TPH                       | $P\bar{3}m1(164)$ | $Amm2(38)$ | $P6/mmm(191)$     | 9.05               | 9.05  | 60.0  | 36.2           | 8.48  | 8.48  | 60.0            | 0.025          | 0.098             | 0.0               | 0.0  | 0.0  |
| AgK <sub>2</sub>  | THX                       | $C2/m(12)$        | $Amm2(38)$ | -                 | 10.05              | 10.04 | 56.1  | 50.5           | 10.08 | 10.29 | 50.5            | 0.348          | 2.338             | 0.0               | 0.0  | 0.0  |
| PtAg <sub>2</sub> | THX                       | $P\bar{3}m1(164)$ | $Amm2(38)$ | -                 | 8.98               | 8.97  | 59.5  | 7.8            | 7.78  | 7.80  | 60.9            | 0.101          | 1.069             | 0.0               | 0.0  | 0.0  |
| AgCs <sub>2</sub> | TPH                       | $P\bar{3}m1(164)$ | $Amm2(38)$ | $Cm(8)$           | 11.02              | 11.02 | 60.0  | 54.6           | 10.98 | 10.94 | 54.6            | 0.267          | 0.523             | 0.0               | 0.0  | 0.0  |
| AgBi <sub>2</sub> | THX                       | $P\bar{1}(2)$     | $Amm2(38)$ | -                 | 13.84              | 9.79  | 39.2  | 42.9           | 9.49  | 9.48  | 42.9            | 0.078          | 0.890             | 0.0               | 0.0  | 0.0  |
| CdGe <sub>2</sub> | HXX                       | -                 | $Amm2(38)$ | -                 | -                  | -     | -     | 36.9           | 9.22  | 9.22  | 36.9            | 1.601          | 1.654             | 0.0               | 0.0  | 0.0  |
| CdSn <sub>2</sub> | HXX                       | -                 | $Amm2(38)$ | -                 | -                  | -     | -     | 37.6           | 9.63  | 9.78  | 37.6            | 1.492          | 2.923             | 0.0               | 0.0  | 0.0  |
| CdTi <sub>2</sub> | THX                       | $C2/m(12)$        | $Amm2(38)$ | $Cm(8)$           | 9.39               | 9.40  | 41.4  | 40.5           | 9.32  | 9.26  | 40.5            | 0.451          | 2.846             | 0.0               | 0.0  | 0.0  |
| InAl <sub>2</sub> | PHX                       | -                 | $Amm2(38)$ | -                 | -                  | -     | -     | 35.3           | 9.28  | 9.28  | 35.3            | 2.065          | 3.373             | 0.0               | 0.0  | 0.0  |
| InIn <sub>2</sub> | HXX                       | -                 | $Amm2(38)$ | -                 | -                  | -     | -     | 37.4           | 9.65  | 9.57  | 37.4            | 2.288          | 2.307             | 0.0               | 0.0  | 0.0  |
| SnK <sub>2</sub>  | HXX                       | -                 | $Amm2(38)$ | -                 | -                  | -     | -     | 45.0           | 10.55 | 11.48 | 45.0            | 2.089          | 2.307             | 0.0               | 0.0  | 0.0  |
| SnRb <sub>2</sub> | HXX                       | -                 | $Amm2(38)$ | -                 | -                  | -     | -     | 45.6           | 10.89 | 11.68 | 45.6            | 1.481          | 2.099             | 0.0               | 0.0  | 0.0  |
| SnIn <sub>2</sub> | HXX                       | -                 | $Amm2(38)$ | -                 | -                  | -     | -     | 39.1           | 9.54  | 9.31  | 39.1            | 0.694          | 1.499             | 0.0               | 0.0  | 0.0  |
| SbLi <sub>2</sub> | THX                       | $P\bar{1}(2)$     | $Amm2(38)$ | -                 | 9.10               | 9.50  | 41.1  | 41.5           | 9.25  | 9.22  | 41.5            | 0.694          | 2.421             | 0.0               | 0.0  | 0.0  |
| SbRb <sub>2</sub> | HXX                       | -                 | $Amm2(38)$ | -                 | -                  | -     | -     | 45.7           | 10.78 | 11.48 | 45.7            | 1.195          | 2.554             | 0.0               | 0.0  | 0.0  |
| SbIn <sub>2</sub> | HXX                       | -                 | $Amm2(38)$ | -                 | -                  | -     | -     | 43.2           | 9.02  | 9.00  | 43.2            | 0.937          | 3.263             | 0.0               | 0.0  | 0.0  |
| SbCs <sub>2</sub> | HXX                       | -                 | $Amm2(38)$ | -                 | -                  | -     | -     | 44.4           | 11.27 | 11.95 | 44.4            | 1.231          | 1.308             | 0.0               | 0.0  | 0.0  |
| SbTi <sub>2</sub> | HPX                       | -                 | $Amm2(38)$ | $P2/c(13)$        | -                  | -     | -     | 41.1           | 9.69  | 9.65  | 41.1            | 0.209          | 1.189             | 0.0               | 0.0  | 0.0  |
| IRb <sub>2</sub>  | HPX                       | -                 | $Amm2(38)$ | $P1(1)$           | -                  | -     | -     | 55.9           | 10.57 | 10.55 | 55.9            | 0.072          | 0.937             | 0.0               | 0.0  | 0.0  |
| ICs <sub>2</sub>  | THP                       | $P\bar{3}m1(164)$ | $Amm2(38)$ | $P1(1)$           | 10.99              | 10.96 | 58.9  | 55.7           | 11.22 | 11.18 | 55.7            | 0.245          | 0.271             | 0.0               | 0.0  | 0.0  |
| CsN <sub>2</sub>  | TPH                       | $P2/c(13)$        | $Amm2(38)$ | $Pmma(51)$        | 10.96              | 10.42 | 61.7  | 55.0           | 10.37 | 10.34 | 55.0            | 0.169          | 0.689             | 20.0              | 20.0 | 20.0 |
| CsF <sub>2</sub>  | HPX                       | -                 | $Amm2(38)$ | $Cmmm(65)$        | -                  | -     | -     | 34.5           | 10.12 | 10.13 | 55.1            | 0.512          | 1.732             | 4.0               | 4.0  | 4.0  |
| BaCa <sub>2</sub> | HXX                       | -                 | $Amm2(38)$ | -                 | -                  | -     | -     | 35.6           | 13.20 | 13.23 | 34.5            | 1.951          | 1.981             | 0.0               | 0.0  | 0.0  |
| BaSr <sub>2</sub> | HXX                       | -                 | $Amm2(38)$ | -                 | -                  | -     | -     | 35.6           | 13.70 | 13.69 | 35.6            | 1.993          | 2.024             | 0.0               | 0.0  | 0.0  |
| BaCs <sub>2</sub> | HXX                       | -                 | $Amm2(38)$ | -                 | -                  | -     | -     | 35.9           | 15.57 | 15.52 | 35.9            | 1.937          | 2.001             | 0.0               | 0.0  | 0.0  |
| BaBa <sub>2</sub> | HXX                       | -                 | $Amm2(38)$ | -                 | -                  | -     | -     | 34.9           | 14.13 | 14.12 | 34.9            | 2.303          | 2.377             | 0.0               | 0.0  | 0.0  |
| OsMg <sub>2</sub> | HXX                       | -                 | $Amm2(38)$ | -                 | -                  | -     | -     | 44.6           | 9.01  | 6.25  | 44.6            | 1.045          | 12.251            | 0.0               | 0.0  | 0.0  |
| IrIn <sub>2</sub> | HPT                       | $P\bar{3}m1(164)$ | $Amm2(38)$ | $P\bar{3}m1(164)$ | 8.28               | 8.27  | 60.2  | 43.4           | 8.14  | 8.15  | 43.4            | 0.330          | 0.337             | 0.0               | 0.0  | 0.0  |
| PtGa <sub>2</sub> | HTX                       | $P\bar{3}m1(164)$ | $Amm2(38)$ | -                 | 8.10               | 8.10  | 59.8  | 41.5           | 7.80  | 7.78  | 41.5            | 0.189          | 2.943             | 0.0               | 0.0  | 0.0  |
| PtAs <sub>2</sub> | TPH                       | $C2/m(12)$        | $Amm2(38)$ | $C2/m(12)$        | 8.31               | 8.31  | 53.4  | 40.4           | 8.32  | 8.32  | 40.4            | 0.052          | 0.125             | 0.0               | 0.0  | 0.0  |
| PtRu <sub>2</sub> | THP                       | $C2/m(12)$        | $Amm2(38)$ | $Pmmm(59)$        | 9.42               | 9.42  | 33.1  | 33.5           | 9.04  | 9.04  | 33.5            | 0.224          | 0.255             | 5.8               | 5.8  | 5.8  |
| PtIn <sub>2</sub> | HTX                       | $P\bar{3}m1(164)$ | $Amm2(38)$ | -                 | 8.56               | 8.53  | 60.2  | 42.5           | 8.10  | 8.10  | 42.5            | 0.408          | 3.977             | 0.0               | 0.0  | 0.0  |
| PtIr <sub>2</sub> | HTX                       | $C2/m(12)$        | $Amm2(38)$ | -                 | 9.25               | 9.25  | 33.1  | 33.2           | 9.09  | 9.10  | 33.2            | 0.235          | 1.098             | 0.0               | 0.0  | 0.0  |
| PtHg <sub>2</sub> | HTX                       | $P\bar{3}m1(164)$ | $Amm2(38)$ | -                 | 8.73               | 8.72  | 59.8  | 38.3           | 8.89  | 8.87  | 38.3            | 0.655          | 1.251             | 0.0               | 0.0  | 0.0  |
| PtTi <sub>2</sub> | PHT                       | $P\bar{3}m1(164)$ | $Amm2(38)$ | $P2_1/m(11)$      | 8.73               | 8.72  | 58.9  | 43.6           | 8.37  | 8.39  | 43.6            | 0.035          | 0.093             | 0.0               | 0.0  | 0.0  |
| PtBi <sub>2</sub> | HPT                       | $P\bar{3}m1(164)$ | $Amm2(38)$ | $P\bar{3}m1(164)$ | 8.76               | 8.68  | 58.8  | 52.6           | 8.70  | 8.60  | 52.6            | 0.545          | 0.554             | 0.0               | 0.0  | 0.0  |
| AuK <sub>2</sub>  | PTH                       | $P\bar{3}m1(164)$ | $Amm2(38)$ | $P1(2)$           | 9.75               | 9.76  | 59.6  | 50.6           | 10.01 | 10.08 | 50.6            | 0.142          | 0.621             | 0.0               | 0.0  | 0.0  |
| AuGa <sub>2</sub> | THX                       | $C2/m(12)$        | $Amm2(38)$ | -                 | 8.84               | 8.84  | 35.9  | 35.7           | 8.86  | 8.82  | 35.7            | 0.157          | 0.838             | 0.0               | 0.0  | 0.0  |
| AuGe <sub>2</sub> | HXX                       | -                 | $Amm2(38)$ | -                 | -                  | -     | -     | 36.1           | 8.91  | 8.89  | 36.1            | 0.908          | 0.962             | 0.0               | 0.0  | 0.0  |
| AuRb <sub>2</sub> | THP                       | $P\bar{3}m1(164)$ | $Amm2(38)$ | $P2_1/m(11)$      | 10.14              | 10.17 | 60.1  | 55.1           | 10.04 | 10.00 | 55.1            | 0.437          | 0.491             | 0.0               | 0.0  | 0.0  |
| AuPd <sub>2</sub> | THX                       | $C2/m(12)$        | $Amm2(38)$ | -                 | 9.68               | 9.67  | 32.9  | 33.5           | 9.40  | 9.42  | 33.5            | 0.742          | 2.001             | 0.0               | 0.0  | 0.0  |
| AuAg <sub>2</sub> | PTH                       | $P6/mmm(191)$     | $Amm2(38)$ | $P6/mmm(191)$     | 9.75               | 9.75  | 59.9  | 35.8           | 9.14  | 9.10  | 35.8            | 0.028          | 0.460             | 0.0               | 0.0  | 0.0  |
| AuCs <sub>2</sub> | THP                       | $P\bar{3}m1(164)$ | $Amm2(38)$ | $P1(2)$           | 10.73              | 10.72 | 59.6  | 55.1           | 10.62 | 10.69 | 55.1            | 0.621          | 0.654             | 0.0               | 0.0  | 0.0  |
| AuHg <sub>2</sub> | HTX                       | $P\bar{3}m1(164)$ | $Amm2(38)$ | -                 | 9.44               | 9.43  | 58.5  | 36.8           | 9.11  | 9.09  | 36.8            | 0.323          | 0.914             | 0.0               | 0.0  | 0.0  |
| AuBi <sub>2</sub> | HPT                       | $P\bar{3}m1(164)$ | $Amm2(38)$ | $P1(1)$           | 8.89               | 8.88  | 57.7  | 45.5           | 9.23  | 9.23  | 45.5            | 0.112          | 0.325             | 0.0               | 0.0  | 0.0  |
| HgSn <sub>2</sub> | HPX                       | $Amm2(38)$        | $Amm2(38)$ | $Pm(6)$           | -                  | -     | -     | 46.2           | 9.70  | 9.71  | 38.1            | 0.567          | 1.287             | 0.0               | 0.0  | 0.0  |
| TlIn <sub>2</sub> | HPX                       | -                 | $Amm2(38)$ | $Cm(8)$           | -                  | -     | -     | 58.4           | 6.97  | 6.64  | 58.4            | 4.448          | 4.086             | 0.0               | 0.0  | 0.0  |
| PbRb <sub>2</sub> | HXX                       | -                 | $Amm2(38)$ | -                 | -                  | -     | -     | 46.2           | 10.96 | 11.95 | 46.2            | 1.818          | 3.099             | 0.0               | 0.0  | 0.0  |
| PbIn <sub>2</sub> | HXX                       | -                 | $Amm2(38)$ | -                 | -                  | -     | -     | 38.4           | 9.90  | 9.90  | 38.4            | 1.235          | 1.498             | 0.0               | 0.0  | 0.0  |
| BiLi <sub>2</sub> | THX                       | $P\bar{1}(2)$     | $Amm2(38)$ | -                 | 10.13              | 9.04  | 39.2  | 41.8           | 9.50  | 9.45  | 41.8            | 0.802          | 2.355             | 0.0               | 0.0  | 0.0  |
| BiIn <sub>2</sub> | HXX                       | -                 | $Amm2(38)$ | -                 | -                  | -     | -     | 42.6           | 9.32  | 9.28  | 42.6            | 1.375          | 2.254             | 0.0               | 0.0  | 0.0  |
| BiHg <sub>2</sub> | HXX                       | -                 | $Amm2(38)$ | -                 | -                  | -     | -     | 33.0           | 10.97 | 10.95 | 33.0            | 0.957          | 1.721             | 0.0               | 0.0  | 0.0  |
| BiTi <sub>2</sub> | HXX                       | -                 | $Amm2(38)$ | -                 | -                  | -     | -     | 41.5           | 9.88  | 9.86  | 41.5            | 1.495          | 1.525             | 0.0               | 0.0  | 0.0  |



Table 7: List of  $Cmnm(65)$ 

| species           | Initial structure indices | space group   |             |            | lattice parameters |       |       |                |       |       | relative energy |                | spin moment       |                   |      |      |
|-------------------|---------------------------|---------------|-------------|------------|--------------------|-------|-------|----------------|-------|-------|-----------------|----------------|-------------------|-------------------|------|------|
|                   |                           | T             | H           | P          | a [Å]              | b [Å] | c [Å] | $\gamma$ [deg] | a [Å] | b [Å] | c [Å]           | $\gamma$ [deg] | $\Delta E_1$ [eV] | $\Delta E_2$ [eV] | T    | H    |
| LiLi <sub>2</sub> | HXX                       | $Cmnm(65)$    | $Amm2(38)$  | —          | 5.97               | 7.76  | 49.0  | 6.03           | 6.52  | 57.8  | —               | 0.160          | 4.548             | 0.0               | 0.0  | —    |
| LiCd <sub>2</sub> | HXX                       | $Cmnm(65)$    | $Cmnm(65)$  | —          | —                  | —     | —     | 6.00           | 9.16  | 40.2  | —               | 2.170          | 2.316             | —                 | 0.0  | —    |
| BeBe <sub>2</sub> | HXX                       | $Cmnm(65)$    | $P6m2(187)$ | —          | 4.24               | 4.73  | 56.1  | 4.39           | 4.39  | 120.0 | —               | 0.167          | 6.772             | 0.0               | 0.0  | —    |
| NNi <sub>2</sub>  | TPX                       | $P3m1(164)$   | —           | $Cmnm(65)$ | 5.64               | 5.65  | 59.5  | —              | —     | —     | 9.50            | 0.040          | 0.850             | 0.0               | 0.0  | 0.0  |
| OMg <sub>2</sub>  | PHT                       | $P3m1(164)$   | —           | $Cmnm(65)$ | 6.14               | 6.14  | 59.2  | —              | —     | —     | 10.08           | 0.070          | 1.747             | 0.0               | 0.0  | 0.0  |
| OFe <sub>2</sub>  | PHT                       | $P3m1(164)$   | —           | $Cmnm(65)$ | 5.37               | 5.37  | 59.8  | —              | —     | —     | 10.07           | 0.083          | 0.553             | 26.4              | 25.4 | 24.2 |
| FLi <sub>2</sub>  | PHX                       | —             | $P6m2(187)$ | —          | —                  | —     | —     | 5.33           | 5.32  | 59.8  | —               | 0.134          | 1.185             | —                 | 0.0  | 0.0  |
| FNAl <sub>2</sub> | PTH                       | $P3m1(164)$   | —           | $Cmnm(65)$ | 7.04               | 7.03  | 59.0  | —              | —     | —     | 11.48           | 0.347          | 0.787             | 0.0               | 0.0  | 0.0  |
| FK <sub>2</sub>   | PTH                       | $P3m1(164)$   | —           | $Cmnm(65)$ | 8.42               | 8.42  | 56.0  | —              | —     | —     | 13.89           | 0.070          | 0.574             | 0.0               | 0.0  | 0.0  |
| FRb <sub>2</sub>  | PTH                       | $P3m1(164)$   | —           | $Cmnm(65)$ | 8.94               | 8.93  | 55.9  | —              | —     | —     | 16.17           | 0.007          | 0.138             | 0.0               | 0.0  | 0.0  |
| NaN <sub>2</sub>  | THP                       | $P3m1(164)$   | —           | $Cmnm(65)$ | 8.21               | 8.27  | 59.1  | —              | —     | —     | 17.12           | 0.466          | 0.542             | 20.0              | 20.0 | 20.0 |
| NaSi <sub>2</sub> | TPX                       | $Cmnm(65)$    | —           | $Cmnm(65)$ | 12.29              | 12.29 | 36.3  | —              | —     | —     | 10.65           | 0.281          | 6.475             | 0.0               | 0.0  | 0.0  |
| NaAl <sub>2</sub> | HXX                       | —             | $Cmnm(65)$  | —          | —                  | —     | —     | 5.81           | 9.01  | 38.3  | —               | 1.783          | 1.787             | —                 | 0.0  | —    |
| AlRb <sub>2</sub> | THX                       | $C2/m(12)$    | —           | $Cmnm(65)$ | 11.40              | 11.84 | 44.1  | —              | —     | —     | 10.18           | 0.424          | 5.631             | 0.0               | 0.0  | —    |
| SiC <sub>2</sub>  | HXX                       | —             | $Cmnm(65)$  | —          | —                  | —     | —     | 4.84           | 6.22  | 49.9  | —               | 2.504          | 5.007             | —                 | 0.0  | —    |
| SiZr <sub>2</sub> | HPT                       | —             | $Cmnm(65)$  | —          | 7.94               | 8.03  | 59.0  | —              | —     | —     | 6.72            | 0.030          | 0.736             | 0.0               | 0.0  | 0.0  |
| CaCr <sub>2</sub> | HXX                       | —             | $Cmnm(65)$  | —          | —                  | —     | —     | 5.96           | 7.48  | 51.1  | —               | 3.709          | 3.723             | —                 | 36.4 | —    |
| CaRb <sub>2</sub> | HXX                       | —             | $Cmnm(65)$  | —          | —                  | —     | —     | 6.42           | 10.52 | 34.3  | —               | 3.612          | 3.733             | —                 | 0.0  | —    |
| CaSr <sub>2</sub> | HXX                       | —             | $Cmnm(65)$  | —          | —                  | —     | —     | 8.12           | 11.93 | 42.7  | —               | 5.908          | 6.058             | —                 | 0.0  | —    |
| CaSb <sub>2</sub> | HXX                       | —             | $Cmnm(65)$  | —          | —                  | —     | —     | 9.52           | 11.96 | 36.0  | —               | 1.402          | 4.121             | —                 | 0.0  | —    |
| CaBa <sub>2</sub> | HXX                       | —             | $Cmnm(65)$  | —          | —                  | —     | —     | 8.41           | 13.79 | 34.9  | —               | 5.809          | 6.597             | —                 | 0.0  | —    |
| SeCr <sub>2</sub> | HXX                       | —             | $Cmnm(65)$  | —          | —                  | —     | —     | 6.02           | 9.89  | 34.7  | —               | 5.287          | 8.769             | —                 | 32.2 | —    |
| SeGe <sub>2</sub> | HXX                       | —             | $Cmnm(65)$  | —          | —                  | —     | —     | 7.97           | 10.15 | 38.2  | —               | 2.631          | 2.774             | —                 | 0.0  | —    |
| TiTi <sub>2</sub> | HTX                       | $P4/mmm(123)$ | —           | $Cmnm(65)$ | 6.71               | 9.49  | 44.8  | —              | —     | —     | 7.01            | 0.061          | 6.409             | 0.0               | 0.0  | —    |
| VB <sub>2</sub>   | HPX                       | —             | $Cmnm(65)$  | —          | —                  | —     | —     | 6.29           | 7.98  | 37.9  | —               | 8.06           | 2.263             | —                 | 0.0  | 4.0  |
| VV <sub>2</sub>   | HXX                       | —             | $Cmnm(65)$  | —          | —                  | —     | —     | 8.01           | 5.10  | 35.3  | —               | 6.097          | 19.320            | —                 | 0.0  | —    |
| VCD <sub>2</sub>  | HTX                       | $Cmnm(65)$    | —           | $Cmnm(65)$ | 6.93               | 9.05  | 39.6  | —              | —     | —     | 8.64            | 0.725          | 8.211             | 0.0               | 0.0  | —    |
| CrBr <sub>2</sub> | THX                       | $C2/m(12)$    | —           | $Cmnm(65)$ | 8.07               | 8.07  | 53.5  | —              | —     | —     | 8.02            | 0.554          | 2.069             | 16.0              | 16.0 | —    |
| MnBe <sub>2</sub> | HTX                       | $P4/mmm(123)$ | —           | $Cmnm(65)$ | 5.15               | 7.25  | 45.2  | —              | —     | —     | 4.60            | 0.801          | 7.736             | 7.7               | 0.0  | —    |
| MnB <sub>2</sub>  | PXX                       | —             | —           | $Cmnm(65)$ | —                  | —     | —     | —              | —     | —     | —               | 1.841          | 4.105             | —                 | 11.0 | —    |
| FePd <sub>2</sub> | HTX                       | $Cmnm(65)$    | $P6m2(187)$ | —          | 5.54               | 8.18  | 41.8  | —              | —     | —     | 5.48            | 0.217          | 1.393             | 15.4              | 15.7 | —    |
| AsRb <sub>2</sub> | HXX                       | —             | $Cmnm(65)$  | —          | —                  | —     | —     | 9.67           | 12.74 | 36.5  | —               | 2.480          | 2.557             | —                 | 0.0  | —    |
| Se <sub>2</sub>   | HTX                       | $P1(2)$       | —           | $Cmnm(65)$ | 7.92               | 10.24 | 76.2  | —              | —     | —     | 9.54            | 0.078          | 0.890             | 0.0               | 0.0  | —    |
| RbAu <sub>2</sub> | PXX                       | $Cmnm(65)$    | —           | $Cmnm(65)$ | 13.37              | 13.42 | 46.9  | —              | —     | —     | —               | 13.40          | 13.44             | 46.8              | 0.0  | 0.0  |
| SrB <sub>2</sub>  | TPX                       | $Cmnm(65)$    | —           | $Cmnm(65)$ | 10.86              | 10.88 | 34.3  | —              | —     | —     | —               | 10.88          | 10.87             | 34.2              | 0.0  | 0.0  |
| SrP <sub>2</sub>  | TPX                       | $C2/m(12)$    | —           | $Cmnm(65)$ | 11.14              | 11.14 | 37.4  | —              | —     | —     | —               | 11.31          | 11.31             | 43.7              | 0.0  | 0.0  |
| SrK <sub>2</sub>  | HXX                       | —             | $Cmnm(65)$  | —          | —                  | —     | —     | 14.81          | 8.76  | 32.3  | —               | 4.385          | 4.424             | —                 | 0.0  | —    |
| SrCa <sub>2</sub> | HXX                       | —             | $Cmnm(65)$  | —          | —                  | —     | —     | 7.90           | 13.16 | 34.6  | —               | 6.178          | 6.180             | —                 | 0.0  | —    |
| SrCe <sub>2</sub> | TPX                       | $C2/m(12)$    | —           | $Cmnm(65)$ | 12.13              | 12.13 | 39.3  | —              | —     | —     | 12.45           | 0.256          | 4.014             | 0.0               | 0.0  | —    |
| SrSn <sub>2</sub> | TPX                       | $C2/m(12)$    | —           | $Cmnm(65)$ | 12.68              | 12.68 | 42.2  | —              | —     | —     | 13.25           | 0.389          | 4.638             | 0.0               | 0.0  | —    |
| SrSb <sub>2</sub> | HXX                       | —             | $Cmnm(65)$  | —          | —                  | —     | —     | 10.03          | 12.61 | 36.5  | —               | 1.128          | 3.870             | —                 | 0.0  | —    |
| SrBa <sub>2</sub> | HXX                       | —             | $Cmnm(65)$  | —          | —                  | —     | —     | 8.63           | 14.42 | 33.6  | —               | 6.319          | 6.612             | —                 | 0.0  | —    |
| SrAu <sub>2</sub> | TPH                       | $P6/mmm(191)$ | —           | $Cmnm(65)$ | 10.80              | 10.84 | 60.1  | —              | —     | —     | 11.38           | 0.060          | 0.644             | 0.0               | 0.0  | 0.0  |
| SrPb <sub>2</sub> | TPX                       | $C2/m(12)$    | —           | $Cmnm(65)$ | 12.83              | 12.83 | 43.5  | —              | —     | —     | 12.72           | 0.402          | 3.960             | 0.0               | 0.0  | 0.0  |
| YB <sub>2</sub>   | TPX                       | $Cmnm(65)$    | —           | $Cmnm(65)$ | 9.96               | 9.96  | 37.0  | —              | —     | —     | 9.95            | 0.002          | 9.924             | 0.0               | 0.0  | —    |
| ZrCr <sub>2</sub> | HXX                       | —             | $Cmnm(65)$  | —          | —                  | —     | —     | 6.06           | 9.42  | 39.0  | —               | 7.350          | 13.581            | —                 | 29.3 | —    |
| ZrBi <sub>2</sub> | PXX                       | —             | —           | $Cmnm(65)$ | —                  | —     | —     | —              | —     | —     | —               | 8.00           | 6.69              | —                 | 0.0  | —    |
| MoBe <sub>2</sub> | HTX                       | $Cmnm(65)$    | $Pmm2(25)$  | —          | 5.16               | 8.03  | 38.9  | —              | —     | —     | 8.81            | 0.355          | 6.371             | 0.0               | 0.0  | —    |
| MoCl <sub>2</sub> | PTH                       | $C2/m(12)$    | —           | $Cmnm(65)$ | 8.81               | 8.81  | 49.2  | —              | —     | —     | 7.99            | 0.039          | 0.176             | 16.0              | 16.0 | 16.0 |
| MoBr <sub>2</sub> | THP                       | $C2/m(12)$    | —           | $Cmnm(65)$ | 8.92               | 8.92  | 50.9  | —              | —     | —     | 14.76           | 0.198          | 0.629             | 16.0              | 16.0 | 16.0 |
| MoI <sub>2</sub>  | THX                       | $C2/m(12)$    | —           | $Cmnm(65)$ | 9.33               | 9.33  | 51.8  | —              | —     | —     | —               | 0.269          | 2.477             | 15.9              | 16.0 | —    |
| RhB <sub>2</sub>  | TPX                       | $Pmmn(59)$    | —           | $Cmnm(65)$ | 7.53               | 7.53  | 48.0  | —              | —     | —     | 7.97            | 0.399          | 8.642             | 0.0               | 0.0  | —    |
| RhF <sub>2</sub>  | PXX                       | —             | —           | $Cmnm(65)$ | —                  | —     | —     | —              | —     | —     | —               | 2.132          | 4.657             | —                 | 4.0  | —    |
| PdB <sub>2</sub>  | PTH                       | $Cmnm(65)$    | —           | $Cmnm(65)$ | 8.13               | 8.13  | 44.4  | —              | —     | —     | 8.13            | 0.013          | 0.016             | 0.0               | 0.0  | 0.0  |
| PdCl <sub>2</sub> | HTX                       | $P3m1(164)$   | —           | $Cmnm(65)$ | 7.48               | 7.48  | 59.9  | —              | —     | —     | —               | 0.753          | 3.561             | 8.0               | 0.0  | —    |
| PdBr <sub>2</sub> | PHT                       | $P3m1(164)$   | —           | $Cmnm(65)$ | 7.84               | 7.84  | 59.8  | —              | —     | —     | 15.26           | 0.020          | 0.475             | 7.9               | 0.0  | 0.0  |
| PdI <sub>2</sub>  | THP                       | $C2/m(12)$    | —           | $Cmnm(65)$ | 10.07              | 10.07 | 45.5  | —              | —     | —     | 8.96            | 0.153          | 0.225             | 0.0               | 0.0  | 0.0  |

(Continued on next page)

Table 7: List of  $Cm\bar{m}m(65)$ 

| species           | Initial structure indices | space group      |                  |                  | lattice parameters |       |       |                |       |       | relative energy |                | spin moment       |                   |      |      |
|-------------------|---------------------------|------------------|------------------|------------------|--------------------|-------|-------|----------------|-------|-------|-----------------|----------------|-------------------|-------------------|------|------|
|                   |                           | T                | H                | P                | a [Å]              | b [Å] | c [Å] | $\gamma$ [deg] | a [Å] | b [Å] | c [Å]           | $\gamma$ [deg] | $\Delta E_1$ [eV] | $\Delta E_2$ [eV] | T    | H    |
| AgBr <sub>2</sub> | $Cm\bar{m}m(65)$          | $P1(1)$          | $Cm\bar{m}m(65)$ | $Cm\bar{m}m(65)$ | 8.90               | 8.90  | 40.6  | 31.9           | 8.88  | 8.89  | 40.6            | 0.222          | 0.245             | 0.0               | 0.0  | 0.0  |
| AgCl <sub>2</sub> | THP                       | $Cm\bar{m}m(65)$ | $Cm\bar{m}m(65)$ | $Cm\bar{m}m(65)$ | 8.35               | 8.34  | 52.2  | 54.0           | 12.12 | 12.12 | 36.2            | 0.354          | 0.505             | 3.0               | 2.8  | 0.0  |
| ImNa <sub>2</sub> | THX                       | $Pmma(51)$       | $Pmma(51)$       | $Cm\bar{m}m(65)$ | 8.86               | 11.40 | 38.1  | 37.7           | 8.85  | 11.33 | —               | 0.056          | 3.600             | 0.0               | 0.0  | —    |
| SnCs <sub>2</sub> | HXX                       | $Cm\bar{m}m(65)$ | $Cm\bar{m}m(65)$ | $Cm\bar{m}m(65)$ | —                  | —     | —     | 39.4           | 10.34 | 13.50 | —               | 2.435          | 2.463             | —                 | 0.0  | —    |
| CsF <sub>2</sub>  | —                         | $Amm2(38)$       | $Amm2(38)$       | $Cm\bar{m}m(65)$ | —                  | —     | —     | 55.1           | 11.40 | 9.82  | —               | 0.512          | 1.732             | —                 | 4.0  | 4.0  |
| CsAl <sub>2</sub> | PTX                       | $Cm\bar{m}m(65)$ | $Cm\bar{m}m(65)$ | $Cm\bar{m}m(65)$ | 15.07              | 15.07 | 36.6  | —              | 14.58 | 14.59 | 37.7            | 0.159          | 6.625             | 0.0               | 0.0  | 0.0  |
| CsCa <sub>2</sub> | TPX                       | $P6/mmm(191)$    | $P6/mmm(191)$    | $Cm\bar{m}m(65)$ | 15.19              | 15.20 | 58.9  | —              | 15.56 | 15.57 | 56.4            | 0.044          | 3.461             | 0.0               | 0.0  | 0.0  |
| CsCr <sub>2</sub> | PTX                       | $Cm\bar{m}m(65)$ | $Cm\bar{m}m(65)$ | $Cm\bar{m}m(65)$ | 14.19              | 14.18 | 46.0  | —              | 14.19 | 14.19 | 46.0            | 0.016          | 3.209             | 42.2              | —    | 42.1 |
| CsSr <sub>2</sub> | TPX                       | $P6/mmm(191)$    | $P6/mmm(191)$    | $Cm\bar{m}m(65)$ | 16.14              | 16.13 | 59.2  | —              | 16.59 | 16.57 | 56.7            | 0.069          | 3.214             | 0.0               | 0.0  | 0.0  |
| CsY <sub>2</sub>  | PTX                       | $C2/m(12)$       | $C2/m(12)$       | $Cm\bar{m}m(65)$ | 15.79              | 15.78 | 43.4  | —              | 15.56 | 15.55 | 44.8            | 0.040          | 4.966             | 14.0              | —    | 13.4 |
| CsAg <sub>2</sub> | PTX                       | $Cm\bar{m}m(65)$ | $Cm\bar{m}m(65)$ | $Cm\bar{m}m(65)$ | 14.23              | 14.22 | 44.8  | —              | 14.23 | 14.25 | 44.8            | 0.028          | 3.849             | 0.0               | 0.0  | 0.0  |
| CsIn <sub>2</sub> | HTP                       | $P1(1)$          | $P1(1)$          | $Cm\bar{m}m(65)$ | 15.03              | 15.01 | 41.2  | 43.9           | 15.17 | 15.15 | 40.9            | 0.504          | 0.543             | 0.0               | 0.0  | 0.0  |
| CsTe <sub>2</sub> | TPX                       | $C2/m(12)$       | $C2/m(12)$       | $Cm\bar{m}m(65)$ | 14.54              | 14.54 | 41.5  | —              | 14.33 | 14.36 | 45.4            | 0.384          | 1.809             | 0.0               | 0.0  | 0.0  |
| CsAu <sub>2</sub> | PTX                       | $Cm\bar{m}m(65)$ | $Cm\bar{m}m(65)$ | $Cm\bar{m}m(65)$ | 13.95              | 13.95 | 45.0  | —              | 13.95 | 13.96 | 45.0            | 0.002          | 4.896             | 0.0               | 0.0  | 0.0  |
| CsPb <sub>2</sub> | TPX                       | $P\bar{1}(2)$    | $P\bar{1}(2)$    | $Cm\bar{m}m(65)$ | 15.50              | 15.51 | 37.4  | —              | 15.45 | 15.45 | 38.3            | 0.152          | 4.817             | 0.0               | 0.0  | 0.0  |
| BaK <sub>2</sub>  | HXX                       | $Cm\bar{m}m(65)$ | $Cm\bar{m}m(65)$ | $Cm\bar{m}m(65)$ | —                  | —     | —     | 32.4           | 15.14 | 8.97  | —               | 5.288          | 5.295             | —                 | 0.0  | —    |
| BaCr <sub>2</sub> | PTH                       | $Pm\bar{m}m(47)$ | $Pm\bar{m}m(47)$ | $Cm\bar{m}m(65)$ | 12.36              | 12.35 | 51.8  | —              | 10.35 | 12.66 | 34.6            | 0.012          | 0.318             | 40.8              | —    | 40.8 |
| BaRb <sub>2</sub> | HXX                       | $Cm\bar{m}m(65)$ | $Cm\bar{m}m(65)$ | $Cm\bar{m}m(65)$ | —                  | —     | —     | 46.8           | 9.25  | 11.07 | 52.8            | 4.754          | 4.775             | —                 | 0.0  | —    |
| BaPd <sub>2</sub> | TPX                       | $C2/m(12)$       | $C2/m(12)$       | $Cm\bar{m}m(65)$ | 11.56              | 11.56 | —     | —              | 10.96 | 13.78 | —               | 0.173          | 1.447             | 0.0               | 0.0  | —    |
| BaSb <sub>2</sub> | HXX                       | $Cm\bar{m}m(65)$ | $Cm\bar{m}m(65)$ | $Cm\bar{m}m(65)$ | 13.51              | 13.52 | 42.2  | —              | 11.61 | 11.62 | 48.4            | 2.519          | 4.322             | 0.0               | 0.0  | —    |
| BaPb <sub>2</sub> | TXX                       | $C2/m(12)$       | $C2/m(12)$       | $Cm\bar{m}m(65)$ | 8.41               | 6.60  | 50.4  | —              | 13.58 | 13.58 | 44.3            | 0.021          | 4.013             | 0.0               | 0.0  | —    |
| HfBi <sub>2</sub> | WBe <sub>2</sub>          | $Pm(6)$          | $Pm(6)$          | $Cm\bar{m}m(65)$ | 7.49               | 8.17  | 23.4  | —              | —     | —     | —               | 2.365          | 4.070             | 0.0               | 0.0  | —    |
| WB <sub>2</sub>   | HTP                       | $C2/m(12)$       | $C2/m(12)$       | $Cm\bar{m}m(65)$ | 9.46               | 9.46  | 47.9  | —              | 5.20  | 8.09  | 38.9            | 0.512          | 3.976             | 0.0               | 0.0  | —    |
| ReB <sub>2</sub>  | THP                       | $P2/m(13)$       | $P2/m(13)$       | $Cm\bar{m}m(65)$ | 7.83               | 6.85  | 44.1  | —              | 8.60  | 8.57  | 53.1            | 0.039          | 0.356             | 15.9              | 15.9 | 15.9 |
| IrBr <sub>2</sub> | HXX                       | $Cm\bar{m}m(65)$ | $Cm\bar{m}m(65)$ | $Cm\bar{m}m(65)$ | —                  | —     | —     | —              | 5.75  | 5.83  | 59.6            | 0.213          | 0.278             | 0.0               | 0.0  | 4.3  |
| PtBe <sub>2</sub> | HXX                       | $Cm\bar{m}m(65)$ | $Cm\bar{m}m(65)$ | $Cm\bar{m}m(65)$ | —                  | —     | —     | —              | 7.41  | 9.03  | 52.7            | 1.219          | 1.663             | —                 | 0.0  | —    |
| PtB <sub>2</sub>  | TPX                       | $P1(1)$          | $Cm\bar{m}m(65)$ | $Cm\bar{m}m(65)$ | 8.01               | 8.01  | 45.8  | —              | 6.41  | 8.39  | 40.2            | 2.567          | 2.855             | —                 | 0.0  | —    |
| PtCl <sub>2</sub> | PTH                       | $Cm\bar{m}m(65)$ | $Pmma(53)$       | $Cm\bar{m}m(65)$ | 10.87              | 10.48 | 36.1  | —              | 8.74  | 8.63  | 47.1            | 0.008          | 10.620            | 0.0               | 0.0  | 0.0  |
| PtNb <sub>2</sub> | PHX                       | $P\bar{1}(2)$    | $Cm\bar{m}m(65)$ | $Cm\bar{m}m(65)$ | —                  | —     | —     | —              | 9.95  | 8.57  | 34.2            | 0.189          | 0.364             | 0.0               | 0.0  | 0.0  |
| Pt <sub>2</sub>   | THX                       | $C2/m(12)$       | $Cm\bar{m}m(65)$ | $Cm\bar{m}m(65)$ | 10.27              | 10.31 | 44.7  | —              | 9.81  | 9.74  | 47.3            | 0.019          | 2.617             | 0.0               | 0.0  | —    |
| AuNa <sub>2</sub> | THX                       | $P2_1/m(11)$     | $Cm\bar{m}m(65)$ | $Cm\bar{m}m(65)$ | 9.75               | 7.58  | 48.7  | —              | 7.50  | 10.43 | 42.6            | 0.527          | 3.404             | 0.0               | 0.0  | —    |
| AuCl <sub>2</sub> | THP                       | $C2/m(12)$       | $Cm\bar{m}m(65)$ | $Cm\bar{m}m(65)$ | 9.06               | 9.08  | 47.6  | —              | 8.19  | 8.16  | 53.3            | 0.056          | 0.313             | 3.2               | 3.1  | 0.0  |
| AuBr <sub>2</sub> | THX                       | $C2/m(12)$       | $Cm\bar{m}m(65)$ | $Cm\bar{m}m(65)$ | 9.13               | 9.14  | 49.1  | —              | 8.48  | 8.48  | 53.4            | 0.020          | 0.853             | 0.0               | 0.0  | —    |
| AuI <sub>2</sub>  | THX                       | $C2/m(12)$       | $Cm\bar{m}m(65)$ | $Cm\bar{m}m(65)$ | 9.66               | 9.68  | 48.9  | —              | 9.12  | 9.12  | 52.3            | 0.111          | 0.875             | 0.0               | 0.0  | —    |
| PbCs <sub>2</sub> | HXX                       | $Cm\bar{m}m(65)$ | $Cm\bar{m}m(65)$ | $Cm\bar{m}m(65)$ | —                  | —     | —     | —              | 10.34 | 13.60 | 40.1            | 2.093          | 3.761             | —                 | 0.0  | —    |

Table 8: List of Memory structures

| species           | Initial structure indices | space group       |                  |                   | lattice parameters |       |       |                |       |       | relative energy |                | spin moment       |                   |     |     |     |
|-------------------|---------------------------|-------------------|------------------|-------------------|--------------------|-------|-------|----------------|-------|-------|-----------------|----------------|-------------------|-------------------|-----|-----|-----|
|                   |                           | T                 | H                | P                 | a [Å]              | b [Å] | c [Å] | $\gamma$ [deg] | a [Å] | b [Å] | c [Å]           | $\gamma$ [deg] | $\Delta E_1$ [eV] | $\Delta E_2$ [eV] | T   | H   | P   |
| BeB <sub>2</sub>  | PXX                       | -                 | -                | <i>Pmnm</i> (59)  | -                  | -     | -     | -              | 6.03  | 6.01  | 60.1            | 1.909          | 2.423             | -                 | -   | -   | 0.0 |
| CoB <sub>2</sub>  | PXX                       | -                 | -                | <i>Pmmm</i> (59)  | -                  | -     | -     | -              | 6.68  | 6.69  | 53.2            | 1.582          | 1.617             | -                 | -   | -   | 0.0 |
| SrAl <sub>2</sub> | PXX                       | -                 | -                | <i>P6mm</i> (183) | -                  | -     | -     | -              | 9.20  | 9.20  | 60.0            | 3.037          | 8.347             | -                 | -   | -   | 0.0 |
| ZrB <sub>2</sub>  | PHT                       | <i>P2/c</i> (13)  | <i>P2/c</i> (13) | <i>P2/c</i> (13)  | 8.79               | 8.74  | 41.0  | 8.78           | 8.74  | 8.76  | 41.1            | 0.003          | 0.004             | 0.0               | 0.0 | 0.0 | 0.0 |
| PdIr <sub>2</sub> | PHX                       | -                 | <i>Amm2</i> (38) | <i>Pmmm</i> (59)  | -                  | -     | -     | 9.21           | 9.21  | 8.72  | 32.4            | 0.795          | 1.191             | -                 | -   | -   | 0.0 |
| CsAl <sub>2</sub> | PTX                       | -                 | -                | <i>Cmme</i> (67)  | 15.07              | 15.07 | 36.6  | -              | 14.58 | 14.59 | 37.7            | 0.159          | 6.625             | 0.0               | 0.0 | -   | 0.0 |
| AuIr <sub>2</sub> | PTX                       | <i>Pmmm</i> (65)  | -                | <i>Pmmm</i> (59)  | 8.35               | 8.87  | 57.9  | -              | 8.38  | 8.37  | 63.9            | 0.161          | 2.445             | 0.0               | 0.0 | -   | 0.0 |
| HgPt <sub>2</sub> | PTX                       | <i>P6mm</i> (183) | -                | <i>Pmmm</i> (59)  | 9.18               | 9.18  | 60.0  | -              | 9.20  | 9.14  | 60.2            | 0.055          | 2.866             | 0.0               | 0.0 | -   | 0.0 |
| PbBe <sub>2</sub> | PTX                       | <i>P6mm</i> (183) | -                | <i>P6mm</i> (183) | 8.03               | 8.03  | 60.0  | -              | 8.03  | 8.03  | 60.0            | 0.000          | 6.908             | 0.0               | 0.0 | -   | 0.0 |

Table 9: List of Planar structures

| species           | Initial structure indices | space group         |                     | lattice parameters |       |       |                |       |       | relative energy |                | spin moment       |                   |     |     |     |     |
|-------------------|---------------------------|---------------------|---------------------|--------------------|-------|-------|----------------|-------|-------|-----------------|----------------|-------------------|-------------------|-----|-----|-----|-----|
|                   |                           | T                   | H                   | a [Å]              | b [Å] | c [Å] | $\gamma$ [deg] | a [Å] | b [Å] | c [Å]           | $\gamma$ [deg] | $\Delta E_1$ [eV] | $\Delta E_2$ [eV] | T   | H   | P   |     |
| CaHg <sub>2</sub> | HPT                       | <i>C2/m</i> (12)    | <i>Amm2</i> (38)    | 11.48              | 11.50 | 37.9  | 10.67          | 10.75 | 41.0  | 10.98           | 10.99          | 0.088             | 0.094             | 0.0 | 0.0 | 0.0 | 0.0 |
| CdAg <sub>2</sub> | PXX                       | -                   | -                   | -                  | -     | -     | -              | -     | -     | 9.96            | 9.96           | 1.025             | 1.245             | -   | -   | -   | -   |
| InOs <sub>2</sub> | PXX                       | -                   | -                   | -                  | -     | -     | -              | -     | -     | 8.97            | 8.96           | 7.610             | 8.673             | -   | -   | -   | -   |
| AuBe <sub>2</sub> | PXX                       | -                   | -                   | -                  | -     | -     | -              | -     | -     | 8.17            | 8.16           | 2.167             | 5.488             | -   | -   | -   | -   |
| AuAg <sub>2</sub> | PTH                       | <i>P6/mmm</i> (191) | <i>Amm2</i> (38)    | 9.75               | 9.75  | 59.9  | 9.14           | 9.10  | 35.8  | 9.75            | 9.75           | 0.028             | 0.460             | 0.0 | 0.0 | 0.0 | 0.0 |
| HgBe <sub>2</sub> | PHT                       | <i>P6/mmm</i> (191) | <i>P6/mmm</i> (191) | 8.29               | 8.29  | 60.0  | 8.29           | 8.29  | 60.0  | 8.29            | 8.30           | 0.016             | 0.018             | 0.0 | 0.0 | 0.0 | 0.0 |
| HgAg <sub>2</sub> | PTX                       | <i>P6/mmm</i> (191) | -                   | 10.01              | 10.02 | 59.7  | -              | -     | -     | 10.01           | 10.01          | 0.055             | 1.936             | 0.0 | -   | -   | -   |
| TlBe <sub>2</sub> | PTH                       | <i>P6/mmm</i> (191) | <i>P6/mmm</i> (191) | 8.40               | 8.40  | 60.0  | 8.39           | 8.39  | 60.0  | 8.40            | 8.40           | 0.005             | 0.006             | 0.0 | 0.0 | 0.0 | 0.0 |

Table 10: List of Distorted planar structures

| species           | Initial structure indices | space group         |                   |                     | lattice parameters |       |         | relative energy |       |         | spin moment       |                   |      |      |      |
|-------------------|---------------------------|---------------------|-------------------|---------------------|--------------------|-------|---------|-----------------|-------|---------|-------------------|-------------------|------|------|------|
|                   |                           | T                   | H                 | P                   | a [Å]              | b [Å] | γ [deg] | a [Å]           | b [Å] | γ [deg] | $\Delta E_1$ [eV] | $\Delta E_2$ [eV] | T    | H    | P    |
| KN <sub>2</sub>   | TPX                       | <i>F3m1</i> (164)   | —                 | <i>P6/mmm</i> (191) | 9.79               | 10.30 | 58.5    | 10.07           | 10.07 | 61.7    | 0.006             | 1.103             | 20.0 | —    | 20.0 |
| VB <sub>2</sub>   | HPX                       | —                   | <i>Cmmm</i> (65)  | <i>Cmmm</i> (65)    | —                  | —     | —       | 6.29            | 7.98  | 37.9    | 0.806             | 2.263             | —    | 0.0  | 4.0  |
| MnB <sub>2</sub>  | PXX                       | —                   | —                 | <i>Cmmm</i> (65)    | —                  | —     | —       | —               | —     | —       | 1.841             | 4.105             | —    | —    | 11.0 |
| RbN <sub>2</sub>  | TPX                       | <i>P2/c</i> (13)    | —                 | <i>P6/mmm</i> (191) | 10.37              | 10.37 | 57.5    | —               | —     | —       | 0.029             | 0.851             | 20.0 | —    | 20.0 |
| RbSr <sub>2</sub> | HTP                       | <i>P6/mmm</i> (191) | <i>Amm2</i> (38)  | <i>P6/mmm</i> (191) | 15.62              | 15.61 | 60.1    | 16.32           | 16.39 | 30.0    | 0.754             | 0.786             | 0.0  | 0.0  | 0.0  |
| SrAu <sub>2</sub> | TPH                       | <i>P6/mmm</i> (191) | <i>P6m2</i> (187) | <i>Cmmm</i> (65)    | 10.80              | 10.84 | 60.1    | 8.49            | 8.59  | 60.0    | 0.060             | 0.644             | 0.0  | 0.0  | 0.0  |
| YB <sub>2</sub>   | TPX                       | <i>Cmmm</i> (65)    | —                 | <i>Cmmm</i> (65)    | 9.96               | 9.96  | 37.0    | —               | —     | —       | 0.002             | 9.924             | 0.0  | —    | 0.0  |
| RhB <sub>2</sub>  | TPX                       | <i>Pmmm</i> (59)    | —                 | <i>Cmmm</i> (65)    | 7.53               | 7.53  | 48.0    | —               | —     | —       | 0.399             | 8.642             | 0.0  | —    | 0.0  |
| PdB <sub>2</sub>  | PTH                       | <i>Cmmm</i> (65)    | <i>Cmmm</i> (65)  | <i>Cmmm</i> (65)    | 8.13               | 8.13  | 44.4    | 8.13            | 8.13  | 44.4    | 0.013             | 0.016             | 0.0  | 0.0  | 0.0  |
| AgAl <sub>2</sub> | TPH                       | <i>F3m1</i> (164)   | <i>Amm2</i> (38)  | <i>P6/mmm</i> (191) | 9.05               | 9.05  | 60.0    | 8.48            | 8.48  | 36.2    | 0.025             | 0.098             | 0.0  | 0.0  | 0.0  |
| InMn <sub>2</sub> | PXX                       | —                   | —                 | <i>P6/mmm</i> (191) | —                  | —     | —       | —               | —     | —       | 2.572             | 2.657             | —    | —    | 22.2 |
| InAu <sub>2</sub> | TPX                       | <i>P6/mmm</i> (191) | —                 | <i>P6/mmm</i> (191) | 9.88               | 9.87  | 60.1    | —               | —     | —       | 0.001             | 1.107             | 0.0  | —    | 0.0  |
| CsF <sub>2</sub>  | HPX                       | —                   | <i>Amm2</i> (38)  | <i>Cmmm</i> (65)    | —                  | —     | —       | 10.12           | 10.13 | 55.1    | 0.512             | 1.732             | —    | 4.0  | 4.0  |
| CsCa <sub>2</sub> | TPX                       | <i>P6/mmm</i> (191) | —                 | <i>Cmmm</i> (65)    | 15.19              | 15.20 | 58.9    | —               | —     | —       | 0.044             | 3.461             | 0.0  | —    | 0.0  |
| CsSr <sub>2</sub> | TPX                       | <i>P6/mmm</i> (191) | —                 | <i>Cmmm</i> (65)    | 16.14              | 16.13 | 59.2    | —               | —     | —       | 0.069             | 3.214             | 0.0  | —    | 0.0  |
| CsIn <sub>2</sub> | HTP                       | <i>C2/m</i> (12)    | —                 | <i>Cmmm</i> (65)    | 15.03              | 15.01 | 41.2    | —               | —     | —       | 0.504             | 0.543             | 0.0  | —    | 0.0  |
| CsTe <sub>2</sub> | TPX                       | <i>C2/m</i> (12)    | —                 | <i>Cmmm</i> (65)    | 14.54              | 14.54 | 41.5    | 13.63           | 12.06 | 43.9    | 0.384             | 1.809             | 0.0  | —    | 0.0  |
| CsCs <sub>2</sub> | PTH                       | <i>F3m1</i> (164)   | —                 | <i>P6/mmm</i> (191) | 18.62              | 18.63 | 58.2    | —               | —     | —       | 0.012             | 2.081             | 0.0  | —    | 0.0  |
| BaCr <sub>2</sub> | PTH                       | <i>Cmmm</i> (65)    | <i>Pmmm</i> (47)  | <i>Cmmm</i> (65)    | 12.36              | 12.35 | 51.8    | 10.35           | 12.66 | 34.6    | 0.213             | 0.318             | 40.8 | 38.5 | 40.8 |
| ReB <sub>2</sub>  | THP                       | <i>P2/c</i> (13)    | <i>Pnma</i> (51)  | <i>Cmmm</i> (65)    | 7.83               | 6.85  | 44.1    | 5.75            | 5.83  | 59.6    | 0.213             | 0.278             | 0.0  | 0.0  | 4.3  |
| PtB <sub>2</sub>  | TPX                       | <i>Cmmm</i> (65)    | —                 | <i>Cmmm</i> (65)    | 8.01               | 8.01  | 45.8    | —               | —     | —       | 0.008             | 10.620            | 0.0  | —    | 0.0  |
| BiAl <sub>2</sub> | PHT                       | <i>F3m1</i> (164)   | <i>P6m2</i> (187) | <i>P6/mmm</i> (191) | 8.84               | 8.84  | 59.7    | 8.63            | 8.60  | 58.5    | 0.564             | 0.719             | 0.0  | 0.0  | 0.0  |
