# Supplementary material for: A structure map for AB2 type 2D materials using high-throughput DFT calculations
Source: Royal Society of Chemistry journal article supplement (doi:10.1039/d0ma00999g), 2021-01-01
Supplement: d0ma00999g2.pdf [file d0ma00999g2.pdf]

## Supplemental information 2

The space-group, lattice parameters, relative energy and spin magnetic moment are shown in the following tables. T, H, and P represent the types of initial structures. X means the structure is not in the group “three stable structures” mentioned in the paper. The order of THP represents their stability. For example, “PTX” means the planar type initial structure is the most stable, the 1T type one is the second stable, and the 1H type one is much more unstable than the others. In other words, X represents a structure whose relative energy exceed 0.03 Hartree ( $\approx 0.82$  eV) per the unit cell including 12 atoms. The space-groups of the obtained final structures for each initial states are also shown. The definitions of relative energies  $\Delta E_1$  and  $\Delta E_2$  are as follows:  $\Delta E_1 = E_{\text{the second stable structure}} - E_{\text{the most stable structure}}$ , and  $\Delta E_2 = E_{\text{the third stable structure}} - E_{\text{the most stable structure}}$ .

Table 1: List of stable structures

| species           | Initial structure indices | space group       |                              |                              | lattice parameters |       |       |                |       |       | relative energy |                | spin moment       |                   |      |     |
|-------------------|---------------------------|-------------------|------------------------------|------------------------------|--------------------|-------|-------|----------------|-------|-------|-----------------|----------------|-------------------|-------------------|------|-----|
|                   |                           | T                 | H                            | P                            | a [Å]              | b [Å] | c [Å] | $\gamma$ [deg] | a [Å] | b [Å] | c [Å]           | $\gamma$ [deg] | $\Delta E_1$ [eV] | $\Delta E_2$ [eV] | T    | H   |
| LiLi <sub>2</sub> | HfX                       | <i>Cmcm</i> (65)  | <i>Amn</i> 2(38)             | —                            | 5.97               | 7.76  | 49.0  | 6.03           | 6.52  | 57.8  | —               | 0.160          | 4.548             | 0.0               | 0.0  | —   |
| LiMg <sub>2</sub> | THX                       | <i>C2/m</i> (12)  | <i>Amn</i> 2(38)             | —                            | 6.15               | 6.61  | 56.9  | 6.60           | 6.17  | 57.5  | —               | 0.152          | 3.972             | 0.0               | 0.0  | —   |
| LiAl <sub>2</sub> | HfX                       | <i>P3m</i> 1(164) | <i>P6m</i> 2(187)            | —                            | 5.46               | 5.45  | 59.9  | 5.45           | 5.45  | 60.0  | —               | 0.046          | 3.644             | 0.0               | 0.0  | —   |
| LiCl <sub>2</sub> | PXX                       | —                 | —                            | <i>P2/m</i> (10)             | —                  | —     | —     | 9.13           | 11.15 | 55.1  | —               | 1.509          | 1.725             | —                 | —    | 0.0 |
| LiSc <sub>2</sub> | PXX                       | —                 | —                            | <i>Pnma</i> (51)             | —                  | —     | —     | 7.23           | 7.23  | 52.5  | —               | 3.306          | 3.363             | —                 | —    | 0.0 |
| LiMn <sub>2</sub> | HXX                       | —                 | —                            | —                            | —                  | —     | —     | —              | —     | —     | —               | 2.707          | 5.736             | —                 | 32.3 | —   |
| LiAg <sub>2</sub> | HXX                       | —                 | <i>P1</i> (2)                | —                            | —                  | —     | —     | 7.75           | 10.43 | 29.6  | —               | 3.253          | 3.264             | —                 | —    | —   |
| LiCd <sub>2</sub> | HXX                       | —                 | <i>P6m</i> 2(187)            | —                            | —                  | —     | —     | 5.83           | 5.84  | 59.9  | —               | 2.170          | 2.316             | —                 | —    | —   |
| LiIn <sub>2</sub> | HXX                       | —                 | <i>Cmcm</i> (65)             | —                            | —                  | —     | —     | 6.00           | 9.16  | 40.2  | —               | 1.741          | 2.532             | —                 | —    | —   |
| LiSn <sub>2</sub> | HXX                       | —                 | <i>P4/mmm</i> (123)          | —                            | —                  | —     | —     | 6.58           | 9.07  | 43.7  | —               | 3.741          | 3.823             | —                 | —    | —   |
| LiCs <sub>2</sub> | HXX                       | —                 | <i>P4/mmm</i> (123)          | —                            | —                  | —     | —     | 8.75           | 6.47  | 42.0  | —               | 0.865          | 1.607             | —                 | —    | —   |
| LiBa <sub>2</sub> | HXX                       | —                 | <i>Amn</i> 2(38)             | —                            | —                  | —     | —     | 12.59          | 12.52 | 46.3  | —               | 1.109          | 6.245             | —                 | —    | —   |
| LiHg <sub>2</sub> | HXX                       | —                 | <i>P4/mmm</i> (123)          | —                            | —                  | —     | —     | 12.24          | 8.58  | 44.8  | —               | 1.491          | 1.549             | —                 | —    | —   |
| LiBi <sub>2</sub> | HXX                       | —                 | <i>P4/mmm</i> (123)          | —                            | —                  | —     | —     | 6.35           | 9.05  | 44.4  | —               | 1.327          | 1.585             | —                 | —    | —   |
| BeBe <sub>2</sub> | HfX                       | <i>Cmcm</i> (65)  | <i>Pnma</i> (51)             | —                            | 4.24               | 4.73  | 56.1  | 4.39           | 4.39  | 120.0 | —               | 0.167          | 6.772             | 0.0               | 0.0  | —   |
| BeB <sub>2</sub>  | PXX                       | —                 | <i>P6m</i> 2(187)            | <i>Pmnm</i> (59)             | —                  | —     | —     | 6.03           | 6.01  | 60.1  | —               | 1.909          | 2.423             | —                 | —    | 0.0 |
| BeO <sub>2</sub>  | HXX                       | —                 | —                            | —                            | —                  | —     | —     | 5.58           | 5.74  | 60.2  | —               | 1.771          | 1.878             | —                 | 2.0  | —   |
| BeMg <sub>2</sub> | THX                       | —                 | <i>P1</i> (1)                | —                            | —                  | —     | —     | 6.11           | 6.31  | 60.8  | —               | 0.494          | 6.478             | 0.0               | 0.0  | —   |
| BeAl <sub>2</sub> | HXX                       | —                 | <i>Amn</i> 2(38)             | —                            | 6.15               | 7.08  | 52.1  | 5.30           | 5.45  | 59.0  | —               | 1.429          | 3.864             | —                 | —    | —   |
| BeSi <sub>2</sub> | HfX                       | <i>C2/m</i> (12)  | <i>Amn</i> 2(38)             | —                            | 7.49               | 7.49  | 39.3  | 7.47           | 7.46  | 39.7  | —               | 0.581          | 4.407             | 0.0               | 0.0  | —   |
| BeP <sub>2</sub>  | HXX                       | —                 | <i>P6m</i> 2(187)            | —                            | —                  | —     | —     | 6.79           | 6.79  | 60.0  | —               | 1.270          | 1.864             | —                 | —    | —   |
| BeCl <sub>2</sub> | PHX                       | —                 | <i>C2</i> (5)                | <i>P1</i> (1)                | —                  | —     | —     | 7.15           | 7.16  | 78.3  | —               | 0.065          | 3.706             | —                 | —    | 0.0 |
| BeK <sub>2</sub>  | PXX                       | —                 | <i>P4m</i> 2(115)            | <i>Pccm</i> (49)             | —                  | —     | —     | 6.68           | 6.68  | 86.6  | —               | 0.457          | 3.017             | —                 | —    | 0.0 |
| BeCa <sub>2</sub> | PTH                       | <i>P3m</i> 1(164) | <i>P6m</i> 2(187)            | <i>P3m</i> 1(164)            | 8.62               | 8.62  | 58.8  | 6.24           | 8.83  | 45.1  | —               | 2.140          | 4.508             | —                 | —    | 0.0 |
| BeSe <sub>2</sub> | HPX                       | —                 | <i>P4/mmm</i> (123)          | <i>P1</i> (2)                | —                  | —     | —     | 5.68           | 7.25  | 38.3  | —               | 0.259          | 0.904             | —                 | —    | 2.3 |
| BeV <sub>2</sub>  | HXX                       | —                 | <i>Pbcm</i> (57)             | —                            | 6.78               | 6.78  | 24.9  | —              | —     | —     | —               | 2.015          | 3.622             | —                 | —    | —   |
| BeCr <sub>2</sub> | THX                       | <i>Cm</i> (8)     | —                            | —                            | —                  | —     | —     | 7.38           | 5.24  | 45.2  | —               | 0.953          | 8.523             | —                 | 1.8  | —   |
| BeMn <sub>2</sub> | HXX                       | —                 | <i>P4/mmm</i> (123)          | —                            | 7.45               | 7.45  | 59.9  | 7.70           | 7.69  | 41.5  | —               | 0.675          | 1.290             | —                 | 29.3 | —   |
| BeGe <sub>2</sub> | HfX                       | <i>P3m</i> 1(164) | <i>Amn</i> 2(38)             | —                            | 10.74              | 10.74 | 56.9  | 10.59          | 10.59 | 49.0  | —               | 2.049          | 3.159             | —                 | —    | 0.0 |
| BeSe <sub>2</sub> | PXX                       | —                 | <i>Amn</i> 2(38)             | <i>C2/m</i> (12)             | —                  | —     | —     | 6.88           | 8.22  | 38.5  | —               | 0.542          | 2.225             | —                 | —    | —   |
| BeRb <sub>2</sub> | THX                       | <i>P3m</i> 1(164) | <i>Amn</i> 2(38)             | —                            | —                  | —     | —     | —              | —     | —     | —               | 1.302          | 2.180             | —                 | —    | 0.0 |
| BeZr <sub>2</sub> | PXX                       | —                 | —                            | <i>P2<sub>1</sub>/m</i> (11) | —                  | —     | —     | 8.70           | 7.49  | 30.6  | —               | 0.481          | 1.048             | —                 | —    | 0.0 |
| BeMo <sub>2</sub> | HPX                       | —                 | <i>P1</i> (2)                | <i>P1</i> (2)                | —                  | —     | —     | 8.70           | 7.49  | 30.6  | —               | 1.128          | 9.799             | —                 | —    | —   |
| BeRu <sub>2</sub> | TXX                       | —                 | —                            | —                            | 8.70               | 7.49  | 30.6  | —              | —     | —     | —               | 1.128          | 9.799             | —                 | —    | —   |
| BeRh <sub>2</sub> | THX                       | <i>C2/m</i> (12)  | <i>P6m</i> 2(187)            | —                            | 6.32               | 5.43  | 49.5  | 5.32           | 5.32  | 59.8  | —               | 0.239          | 1.681             | —                 | —    | —   |
| BeAg <sub>2</sub> | THX                       | <i>C2/m</i> (12)  | <i>Amn</i> 2(38)             | —                            | 8.01               | 5.65  | 44.8  | 6.20           | 5.67  | 56.2  | —               | 0.552          | 5.148             | —                 | —    | —   |
| BeIn <sub>2</sub> | HfX                       | <i>C2/m</i> (12)  | <i>P1</i> (1)                | —                            | 6.90               | 7.89  | 50.3  | 6.92           | 5.95  | 61.2  | —               | 0.494          | 6.038             | —                 | —    | —   |
| BeSb <sub>2</sub> | HXX                       | —                 | <i>P6m</i> 2(187)            | —                            | —                  | —     | —     | 7.71           | 7.71  | 59.2  | —               | 1.290          | 1.822             | —                 | —    | —   |
| BeTe <sub>2</sub> | TPX                       | <i>P3m</i> 1(164) | —                            | <i>P1</i> (2)                | 7.05               | 7.05  | 56.5  | —              | —     | —     | —               | 0.282          | 1.756             | —                 | —    | 0.0 |
| BeI <sub>2</sub>  | HXX                       | —                 | <i>C222</i> (21)             | —                            | —                  | —     | —     | 7.77           | 10.22 | 49.1  | —               | 2.537          | 3.411             | —                 | —    | —   |
| BeCs <sub>2</sub> | THX                       | <i>P3m</i> 1(164) | <i>Amn</i> 2(38)             | —                            | 10.99              | 10.99 | 59.2  | 11.24          | 11.25 | 50.2  | —               | 0.787          | 2.815             | —                 | —    | —   |
| BeBa <sub>2</sub> | PTH                       | <i>P3m</i> 1(164) | <i>P6m</i> 2(187)            | <i>P3m</i> 1(164)            | 10.03              | 10.03 | 57.0  | 8.97           | 8.96  | 58.2  | —               | 0.007          | 0.278             | —                 | —    | 0.0 |
| BeHf <sub>2</sub> | HXX                       | —                 | <i>P4mm</i> (99)             | —                            | —                  | —     | —     | 7.98           | 5.64  | 45.0  | —               | 1.142          | 1.145             | —                 | —    | —   |
| BeTa <sub>2</sub> | HXX                       | —                 | <i>P2<sub>1</sub>/m</i> (11) | —                            | —                  | —     | —     | 6.35           | 5.61  | 55.3  | —               | 7.349          | 8.785             | —                 | —    | —   |
| BeW <sub>2</sub>  | HXX                       | —                 | <i>P1</i> (2)                | —                            | —                  | —     | —     | 7.34           | 8.14  | 37.4  | —               | 1.613          | 1.652             | —                 | —    | —   |
| BeRe <sub>2</sub> | TXX                       | —                 | —                            | —                            | 6.98               | 6.98  | 41.2  | —              | —     | —     | —               | 1.327          | 3.902             | —                 | —    | —   |
| BePt <sub>2</sub> | HXX                       | —                 | <i>P6m</i> 2(187)            | —                            | —                  | —     | —     | 5.51           | 5.52  | 60.0  | —               | 1.509          | 11.273            | —                 | —    | —   |
| BeAu <sub>2</sub> | HfX                       | <i>P3m</i> 1(164) | <i>P6m</i> 2(187)            | —                            | 6.13               | 6.10  | 54.9  | 6.08           | 6.09  | 55.7  | —               | 0.104          | 0.949             | —                 | —    | —   |
| BeTi <sub>2</sub> | HfX                       | <i>P1</i> (1)     | —                            | —                            | 6.29               | 8.79  | 48.2  | 7.00           | 6.15  | 59.0  | —               | 0.040          | 4.767             | —                 | —    | —   |
| BePb <sub>2</sub> | PTH                       | <i>P3m</i> 1(164) | <i>Amn</i> 2(38)             | <i>P3m</i> 1(164)            | 8.34               | 8.34  | 59.2  | 7.87           | 7.87  | 52.1  | —               | 0.012          | 0.416             | —                 | —    | 0.0 |
| BeBi <sub>2</sub> | HPX                       | —                 | <i>P6m</i> 2(187)            | <i>P1</i> (1)                | —                  | —     | —     | 7.90           | 7.89  | 59.7  | —               | 0.342          | 1.070             | —                 | —    | 0.0 |
| BB <sub>2</sub>   | TXX                       | —                 | —                            | —                            | 4.04               | 5.97  | 59.4  | —              | —     | —     | —               | 1.451          | 1.965             | —                 | —    | —   |
| BB <sub>2</sub>   | THX                       | <i>C2/m</i> (12)  | <i>Amn</i> 2(38)             | —                            | 5.12               | 5.68  | 33.6  | 5.37           | 4.94  | 35.3  | —               | 0.713          | 1.914             | —                 | —    | —   |
| BF <sub>2</sub>   | TPX                       | —                 | —                            | —                            | 6.80               | 8.63  | 68.0  | —              | —     | —     | —               | 1.761          | 4.861             | —                 | —    | —   |
| BMg <sub>2</sub>  | TPX                       | <i>P3m</i> 1(164) | —                            | <i>P3m</i> 1(164)            | 7.45               | 7.43  | 55.6  | —              | —     | —     | —               | 0.003          | 1.172             | —                 | —    | 0.0 |
| BAl <sub>2</sub>  | HfX                       | <i>C2/m</i> (12)  | <i>Amn</i> 2(38)             | —                            | 6.48               | 6.65  | 59.2  | 6.66           | 6.34  | 45.2  | —               | 0.492          | 2.832             | —                 | —    | —   |
| BSi <sub>2</sub>  | TPX                       | <i>P3m</i> 1(164) | —                            | <i>P2<sub>1</sub>/m</i> (11) | 6.43               | 6.42  | 60.0  | —              | —     | —     | —               | 0.443          | 1.111             | —                 | —    | 0.0 |

(Continued on next page)

Table 1: List of stable structures

| species           | Initial structure indices | space group                  |                              |                              | lattice parameters |       |       |                |       |       | relative energy |                | spin moment |              |              |                |        |      |                            |     |     |
|-------------------|---------------------------|------------------------------|------------------------------|------------------------------|--------------------|-------|-------|----------------|-------|-------|-----------------|----------------|-------------|--------------|--------------|----------------|--------|------|----------------------------|-----|-----|
|                   |                           | T                            | H                            | P                            | T                  |       |       | H              |       |       | P               |                |             | $\Delta E_1$ | $\Delta E_2$ | T              | H      | P    |                            |     |     |
|                   |                           | a [Å]                        | b [Å]                        | c [Å]                        | a [Å]              | b [Å] | c [Å] | $\gamma$ [deg] | a [Å] | b [Å] | c [Å]           | $\gamma$ [deg] | a [Å]       | b [Å]        | c [Å]        | $\gamma$ [deg] | [eV]   | [eV] | $[\mu_B/\text{unit cell}]$ |     |     |
| BP <sub>2</sub>   | TXX                       | <i>C2/m</i> (12)             | —                            | —                            | 7.19               | 7.19  | 52.4  | —              | —     | —     | —               | —              | —           | —            | —            | 3.719          | 4.235  | 0.0  | —                          | —   |     |
| BCL <sub>2</sub>  | HXX                       | —                            | <i>P1</i> (1)                | —                            | —                  | —     | —     | 8.10           | 7.03  | 79.3  | —               | —              | —           | —            | —            | 5.713          | 5.724  | —    | —                          | 0.0 |     |
| BK <sub>2</sub>   | THX                       | <i>P3m1</i> (164)            | <i>Amm2</i> (38)             | —                            | 10.11              | 10.12 | 57.7  | —              | 9.22  | 9.21  | 52.3            | —              | —           | —            | —            | 0.565          | 2.933  | 11.1 | 3.4                        | —   |     |
| BTi <sub>2</sub>  | PTX                       | <i>P3m1</i> (164)            | —                            | <i>P1</i> (1)                | 6.16               | 6.17  | 60.1  | —              | —     | —     | —               | —              | —           | —            | —            | 0.451          | 3.307  | 0.0  | —                          | 0.0 |     |
| BCr <sub>2</sub>  | HPX                       | —                            | <i>P2<sub>1</sub>/m</i> (10) | <i>P2<sub>1</sub>/m</i> (11) | —                  | —     | —     | 5.02           | 6.08  | 49.1  | —               | —              | —           | —            | —            | 0.558          | 2.198  | —    | —                          | 0.0 |     |
| BMn <sub>2</sub>  | TXX                       | <i>P2<sub>1</sub>/m</i> (11) | —                            | —                            | 6.30               | 6.31  | 60.1  | —              | —     | —     | —               | —              | —           | —            | —            | 1.940          | 5.815  | 27.5 | —                          | —   |     |
| BNi <sub>2</sub>  | THX                       | <i>P3m1</i> (164)            | <i>P6m2</i> (187)            | —                            | 5.27               | 5.27  | 59.6  | —              | 5.12  | 5.12  | 59.6            | —              | —           | —            | —            | 0.413          | 4.629  | 0.0  | 0.0                        | —   |     |
| BGe <sub>2</sub>  | TXX                       | <i>P3m1</i> (164)            | —                            | —                            | 6.71               | 6.71  | 60.0  | —              | —     | —     | —               | —              | —           | —            | —            | 0.916          | 1.964  | 0.0  | —                          | —   |     |
| BSe <sub>2</sub>  | HFX                       | <i>P1</i> (1)                | <i>Cm</i> (8)                | —                            | 8.00               | 6.40  | 49.8  | —              | 6.32  | 6.18  | 77.4            | —              | —           | —            | —            | 0.665          | 5.197  | 0.0  | 0.0                        | —   |     |
| BBR <sub>2</sub>  | TXX                       | <i>P1</i> (1)                | —                            | —                            | 9.54               | 7.93  | 73.5  | —              | —     | —     | —               | —              | —           | —            | —            | 3.011          | 3.019  | 0.0  | —                          | —   |     |
| BBRb <sub>2</sub> | TXX                       | <i>P3m1</i> (164)            | —                            | —                            | 10.45              | 10.46 | 58.3  | —              | —     | —     | —               | —              | —           | —            | —            | 2.549          | 3.286  | 11.0 | —                          | —   |     |
| BSr <sub>2</sub>  | PXX                       | —                            | —                            | <i>P1</i> (2)                | —                  | —     | —     | —              | —     | —     | —               | —              | —           | —            | —            | 1.297          | 3.219  | 0.0  | —                          | —   |     |
| BY <sub>2</sub>   | TXX                       | <i>P3m1</i> (164)            | —                            | —                            | 7.71               | 7.70  | 59.8  | —              | —     | —     | —               | —              | —           | —            | —            | 1.297          | 3.219  | 0.0  | —                          | —   |     |
| BNb <sub>2</sub>  | TXX                       | <i>P3m1</i> (164)            | —                            | —                            | 6.32               | 6.31  | 59.9  | —              | —     | —     | —               | —              | —           | —            | —            | 4.132          | 13.651 | 0.0  | —                          | —   |     |
| BRu <sub>2</sub>  | HXX                       | —                            | —                            | —                            | —                  | —     | —     | 5.57           | 5.58  | —     | —               | —              | —           | —            | —            | 1.003          | 1.062  | —    | —                          | 0.0 |     |
| BRb <sub>2</sub>  | TPH                       | <i>P2<sub>1</sub>/m</i> (11) | <i>P6m2</i> (187)            | —                            | 5.51               | 5.51  | 60.0  | —              | 5.47  | 5.47  | 60.0            | —              | —           | —            | —            | 0.015          | 0.267  | 0.0  | 0.0                        | 0.0 |     |
| BFd <sub>2</sub>  | THX                       | <i>P3m1</i> (164)            | <i>P6m2</i> (187)            | —                            | 5.87               | 5.87  | 60.0  | —              | 5.73  | 5.73  | 59.9            | —              | —           | —            | —            | 0.724          | 3.647  | 0.0  | 0.0                        | —   |     |
| BAG <sub>2</sub>  | TXX                       | <i>Pmma</i> (51)             | —                            | —                            | 5.42               | 6.23  | 54.3  | —              | —     | —     | —               | —              | —           | —            | —            | 5.683          | 7.225  | 0.0  | —                          | —   |     |
| BCd <sub>2</sub>  | THX                       | <i>P1</i> (2)                | <i>Pc</i> (7)                | —                            | 7.21               | 6.78  | 47.1  | —              | 6.65  | 7.14  | 48.1            | —              | —           | —            | —            | 0.767          | 6.092  | 0.0  | 0.0                        | —   |     |
| BSn <sub>2</sub>  | TXX                       | <i>P3m1</i> (164)            | —                            | —                            | 7.36               | 7.36  | 60.0  | —              | —     | —     | —               | —              | —           | —            | —            | 1.261          | 2.480  | 0.0  | —                          | —   |     |
| BSb <sub>2</sub>  | HXX                       | —                            | <i>Cm</i> (8)                | —                            | —                  | —     | —     | 7.20           | 8.84  | 51.6  | —               | —              | —           | —            | —            | 1.994          | 2.447  | —    | —                          | 0.0 |     |
| BBa <sub>2</sub>  | PTX                       | <i>P3m1</i> (164)            | —                            | <i>P3m1</i> (164)            | 9.32               | 9.29  | 58.0  | —              | 6.32  | 6.33  | 53.9            | —              | —           | —            | —            | 0.012          | 1.120  | 4.2  | —                          | 4.2 |     |
| BHF <sub>2</sub>  | HFX                       | <i>P3m1</i> (164)            | —                            | <i>Cm</i> (8)                | 6.59               | 6.59  | 60.0  | —              | 6.32  | 6.33  | 53.9            | —              | —           | —            | —            | 0.060          | 2.799  | 0.0  | 0.0                        | —   |     |
| BTa <sub>2</sub>  | TXX                       | <i>P3m1</i> (164)            | —                            | —                            | 6.25               | 6.25  | 60.0  | —              | —     | —     | —               | —              | —           | —            | —            | 1.487          | 4.771  | 0.0  | —                          | —   |     |
| BW <sub>2</sub>   | HFX                       | <i>P3m1</i> (164)            | —                            | —                            | 6.16               | 6.16  | 60.0  | —              | 5.77  | 5.77  | 59.9            | —              | —           | —            | —            | 0.647          | 4.847  | 0.0  | 0.0                        | —   |     |
| BRe <sub>2</sub>  | HXX                       | —                            | <i>P6m2</i> (187)            | —                            | —                  | —     | —     | 5.66           | 5.66  | 60.0  | —               | —              | —           | —            | —            | 4.914          | 7.263  | —    | —                          | 0.0 |     |
| BOs <sub>2</sub>  | HFX                       | <i>P2<sub>1</sub>/m</i> (11) | <i>Pmm2</i> (25)             | —                            | 5.50               | 5.41  | 59.4  | —              | 5.46  | 5.42  | 59.6            | —              | —           | —            | —            | 0.517          | 11.452 | 0.0  | 0.0                        | —   |     |
| BIr <sub>2</sub>  | THX                       | <i>P3m1</i> (164)            | <i>P6m2</i> (187)            | —                            | 5.43               | 5.43  | 60.0  | —              | 5.48  | 5.46  | 60.0            | —              | —           | —            | —            | 0.226          | 13.691 | 0.0  | 0.0                        | —   |     |
| BPt <sub>2</sub>  | THX                       | <i>P3m1</i> (164)            | <i>P6m2</i> (187)            | —                            | 5.71               | 5.72  | 60.0  | —              | 5.68  | 5.69  | 60.0            | —              | —           | —            | —            | 0.524          | 2.810  | 0.0  | 0.0                        | —   |     |
| BAu <sub>2</sub>  | PXX                       | —                            | —                            | <i>P4/mbm</i> (127)          | —                  | —     | —     | —              | —     | —     | —               | —              | —           | —            | —            | 1.297          | 1.488  | —    | —                          | 0.0 |     |
| BBi <sub>2</sub>  | PXX                       | —                            | —                            | —                            | —                  | —     | —     | —              | —     | —     | —               | —              | —           | —            | —            | 0.982          | 1.241  | —    | —                          | 0.0 |     |
| CB <sub>2</sub>   | PTX                       | <i>P3m1</i> (164)            | —                            | <i>Pmmn</i> (59)             | 5.95               | 5.95  | 60.0  | —              | —     | —     | —               | —              | —           | —            | —            | 0.101          | 5.950  | 0.0  | —                          | 0.0 |     |
| CC <sub>2</sub>   | TPX                       | <i>P1</i> (2)                | —                            | <i>P1</i> (1)                | 5.21               | 5.53  | 36.1  | —              | 4.27  | 4.94  | 30.1            | —              | —           | —            | —            | 0.085          | 3.588  | 0.0  | —                          | 0.0 |     |
| CMg <sub>2</sub>  | HXX                       | —                            | <i>Cm</i> (8)                | —                            | —                  | —     | —     | —              | —     | —     | —               | —              | —           | —            | —            | 4.542          | 4.575  | —    | —                          | 0.0 |     |
| CSi <sub>2</sub>  | TXX                       | <i>P3m1</i> (164)            | —                            | —                            | 7.16               | 7.16  | 59.6  | —              | —     | —     | —               | —              | —           | —            | —            | 2.292          | 3.812  | 0.0  | —                          | —   |     |
| CP <sub>2</sub>   | HXX                       | —                            | —                            | —                            | —                  | —     | —     | —              | 5.87  | 5.85  | 60.9            | —              | —           | —            | —            | 1.045          | 5.705  | —    | —                          | 0.0 |     |
| CS <sub>2</sub>   | PXX                       | —                            | <i>P1</i> (1)                | —                            | —                  | —     | —     | —              | —     | —     | —               | —              | —           | —            | —            | 2.451          | 2.971  | —    | —                          | 0.0 |     |
| CK <sub>2</sub>   | TXX                       | —                            | —                            | —                            | 9.26               | 9.28  | 58.4  | —              | —     | —     | —               | —              | —           | —            | —            | 1.062          | 2.497  | 8.0  | —                          | —   |     |
| CCa <sub>2</sub>  | TXX                       | <i>P3m1</i> (164)            | —                            | —                            | 7.94               | 7.94  | 58.9  | —              | —     | —     | —               | —              | —           | —            | —            | 1.278          | 3.176  | 0.0  | —                          | —   |     |
| CTi <sub>2</sub>  | TXX                       | <i>P3m1</i> (164)            | —                            | —                            | 6.10               | 6.11  | 60.0  | —              | —     | —     | —               | —              | —           | —            | —            | 4.952          | 12.161 | 7.7  | —                          | —   |     |
| CV <sub>2</sub>   | TXX                       | <i>P3m1</i> (164)            | —                            | —                            | 5.76               | 5.77  | 60.0  | —              | —     | —     | —               | —              | —           | —            | —            | 3.652          | 4.154  | 0.0  | —                          | —   |     |
| CCr <sub>2</sub>  | THX                       | <i>P3m1</i> (164)            | <i>P6m2</i> (187)            | —                            | 5.62               | 5.65  | 59.8  | —              | 5.27  | 5.26  | 59.8            | —              | —           | —            | —            | 0.352          | 7.427  | 0.0  | 0.0                        | —   |     |
| CNi <sub>2</sub>  | TXX                       | <i>P3m1</i> (164)            | —                            | —                            | 5.80               | 5.80  | 59.7  | —              | —     | —     | —               | —              | —           | —            | —            | 2.230          | 2.701  | 0.0  | —                          | —   |     |
| CGe <sub>2</sub>  | THX                       | <i>P3m1</i> (164)            | <i>P6m2</i> (187)            | —                            | 6.25               | 6.26  | 60.0  | —              | 6.19  | 6.19  | 60.0            | —              | —           | —            | —            | 0.382          | 1.232  | 0.0  | 0.0                        | —   |     |
| CBR <sub>2</sub>  | PTH                       | <i>P1</i> (1)                | <i>Pmm2</i> (31)             | —                            | 8.51               | 8.37  | 66.6  | —              | 8.16  | 8.17  | 72.3            | —              | —           | —            | —            | 0.047          | 0.084  | 0.0  | 0.0                        | 0.0 |     |
| CRb <sub>2</sub>  | TXX                       | <i>P3m1</i> (164)            | <i>P3m1</i> (164)            | —                            | 9.55               | 9.56  | 58.4  | —              | —     | —     | —               | —              | —           | —            | —            | 0.985          | 2.050  | 8.1  | —                          | —   |     |
| CY <sub>2</sub>   | THX                       | <i>P3m1</i> (164)            | —                            | —                            | 7.10               | 7.11  | 60.1  | —              | 7.10  | 7.11  | 60.1            | —              | —           | —            | —            | 0.003          | 5.500  | 0.0  | 0.0                        | —   |     |
| CNb <sub>2</sub>  | TXX                       | <i>P3m1</i> (164)            | <i>P6m2</i> (187)            | —                            | 6.25               | 6.26  | 60.0  | —              | —     | —     | —               | —              | —           | —            | —            | 3.403          | 8.561  | 0.0  | —                          | —   |     |
| CMo <sub>2</sub>  | HXX                       | —                            | —                            | —                            | —                  | —     | —     | —              | 5.73  | 5.71  | 59.6            | —              | —           | —            | —            | 0.933          | 6.554  | —    | —                          | 0.0 |     |
| CTe <sub>2</sub>  | PXX                       | —                            | <i>P6m2</i> (187)            | —                            | —                  | —     | —     | —              | —     | —     | —               | —              | —           | —            | —            | 1.540          | 3.671  | —    | —                          | 0.0 |     |
| CRu <sub>2</sub>  | HXX                       | —                            | —                            | —                            | —                  | —     | —     | —              | 5.55  | 5.56  | 59.5            | —              | —           | —            | —            | —              | —      | —    | —                          | —   | 0.0 |
| CPd <sub>2</sub>  | TXX                       | <i>P3m1</i> (164)            | <i>P6m2</i> (187)            | —                            | 6.24               | 6.24  | 59.9  | —              | —     | —     | —               | —              | —           | —            | —            | 1.217          | 1.591  | 0.0  | —                          | —   |     |
| CAg <sub>2</sub>  | HFX                       | <i>P3m1</i> (164)            | —                            | —                            | 6.42               | 6.43  | 59.6  | —              | 6.13  | 6.11  | 59.7            | —              | —           | —            | —            | 0.322          | 0.848  | 0.0  | 0.0                        | —   |     |
| CCd <sub>2</sub>  | THX                       | <i>P2<sub>1</sub>/m</i> (11) | <i>Pmm2</i> (31)             | —                            | 7.22               | 6.86  | 58.1  | —              | 6.80  | 6.80  | 52.1            | —              | —           | —            | —            | 0.346          | 2.386  | 0.0  | 0.0                        | —   |     |
| CCs <sub>2</sub>  | PTX                       | <i>P3m1</i> (164)            | —                            | <i>P3m1</i> (164)            | 9.98               | 9.99  | 58.0  | —              | —     | —     | —               | —              | —           | —            | —            | 0.035          | 0.996  | 8.1  | —                          | 8.1 |     |
| CBa <sub>2</sub>  | TXX                       | <i>P3m1</i> (164)            | —                            | —                            | 8.49               | 8.49  | 59.8  | —              | —     | —     | —               | —              | —           | —            | —            | 1.533          | 2.727  | 0.0  | —                          | —   |     |

(Continued on next page)

Table 1: List of stable structures

| species          | Initial structure |                                | space group                    |                   |       | lattice parameters |                |       |       |                |                   | relative energy   |       | spin moment |      |       |       |
|------------------|-------------------|--------------------------------|--------------------------------|-------------------|-------|--------------------|----------------|-------|-------|----------------|-------------------|-------------------|-------|-------------|------|-------|-------|
|                  | indices           | T                              | H                              | P                 | T     |                    |                | H     |       |                | $\Delta E_1$ [eV] | $\Delta E_2$ [eV] | T     | H           | P    |       |       |
|                  |                   |                                |                                |                   | a [Å] | b [Å]              | $\gamma$ [deg] | a [Å] | b [Å] | $\gamma$ [deg] |                   |                   |       |             |      | a [Å] | b [Å] |
| CH <sub>2</sub>  | TXX               | <i>P</i> 3m1(164)              | —                              | —                 | 6.42  | 6.43               | 60.1           | —     | —     | —              | —                 | —                 | 6.411 | 8.695       | 0.0  | —     | —     |
| C1a <sub>2</sub> | TPX               | <i>P</i> 3m1(164)              | —                              | —                 | 6.16  | 6.16               | 59.9           | —     | —     | —              | —                 | —                 | 0.107 | 3.898       | 0.0  | —     | 0.0   |
| CW <sub>2</sub>  | HXX               | —                              | <i>P</i> 6m2(187)              | —                 | —     | —                  | —              | —     | —     | —              | —                 | —                 | 1.818 | 3.061       | —    | 0.0   | —     |
| CR <sub>e2</sub> | HXX               | —                              | <i>P</i> 6m2(187)              | —                 | —     | —                  | —              | —     | —     | —              | —                 | —                 | 1.894 | 5.864       | —    | 0.0   | —     |
| CP <sub>t2</sub> | HXX               | —                              | <i>C</i> m(8)                  | —                 | —     | —                  | —              | —     | —     | —              | —                 | —                 | 1.432 | 2.786       | —    | 0.0   | —     |
| CT <sub>12</sub> | TXX               | —                              | —                              | —                 | 7.80  | 7.80               | 59.6           | —     | —     | —              | —                 | —                 | 1.855 | 2.813       | 0.0  | —     | —     |
| CP <sub>b2</sub> | THX               | <i>P</i> 3m1(164)              | <i>P</i> 6m2(187)              | —                 | 7.28  | 7.29               | 59.9           | —     | —     | —              | —                 | —                 | 0.592 | 3.316       | 0.0  | 0.0   | —     |
| CB <sub>12</sub> | HXX               | —                              | <i>C</i> m(8)                  | —                 | —     | —                  | —              | —     | —     | —              | —                 | —                 | 3.044 | 7.253       | —    | 0.0   | —     |
| NLi <sub>2</sub> | TPX               | <i>P</i> 3m1(164)              | —                              | <i>P</i> 3m1(164) | 6.31  | 6.33               | 59.6           | —     | —     | —              | —                 | —                 | 0.001 | 1.793       | 4.0  | 4.0   | —     |
| NBe <sub>2</sub> | TPX               | <i>C</i> 2/m(12)               | —                              | —                 | 4.94  | 4.95               | 64.7           | —     | —     | —              | —                 | —                 | 0.427 | 2.340       | 0.0  | —     | 0.0   |
| NC <sub>2</sub>  | PXX               | —                              | —                              | —                 | —     | —                  | —              | —     | —     | —              | —                 | —                 | 5.134 | 10.406      | —    | —     | 0.0   |
| NNa <sub>2</sub> | PTX               | <i>P</i> 3m1(164)              | —                              | <i>P</i> 3m1(164) | 7.55  | 7.57               | 59.3           | —     | —     | —              | —                 | —                 | 0.044 | 1.432       | 4.0  | 4.0   | —     |
| NAl <sub>2</sub> | HXX               | —                              | <i>P</i> mm2 <sub>1</sub> (31) | —                 | —     | —                  | —              | —     | —     | —              | —                 | —                 | 3.125 | 4.334       | —    | 0.0   | —     |
| NSi <sub>2</sub> | HTP               | <i>P</i> c(7)                  | —                              | —                 | 5.53  | 5.65               | 60.7           | —     | —     | —              | —                 | —                 | 0.007 | 0.722       | 0.0  | 0.0   | 0.0   |
| NK <sub>2</sub>  | TXX               | <i>P</i> 3m1(164)              | —                              | —                 | 8.68  | 8.68               | 58.5           | —     | —     | —              | —                 | —                 | 0.972 | 3.156       | 4.0  | —     | —     |
| NCa <sub>2</sub> | TXX               | <i>P</i> 3m1(164)              | —                              | —                 | 7.22  | 7.22               | 60.0           | —     | —     | —              | —                 | —                 | 2.863 | 3.023       | 0.0  | —     | —     |
| NTi <sub>2</sub> | TXX               | <i>P</i> 3m1(164)              | —                              | —                 | 5.93  | 5.95               | 60.1           | —     | —     | —              | —                 | —                 | 3.872 | 9.483       | 4.7  | —     | —     |
| NV <sub>2</sub>  | TXX               | <i>P</i> 3m1(164)              | —                              | —                 | 5.75  | 5.76               | 60.0           | —     | —     | —              | —                 | —                 | 1.010 | 1.398       | 0.0  | —     | —     |
| NCr <sub>2</sub> | THX               | <i>P</i> 3m1(164)              | <i>P</i> 6m2(187)              | —                 | 5.67  | 5.67               | 60.7           | —     | —     | —              | —                 | —                 | 0.144 | 3.984       | 7.2  | 0.0   | —     |
| NNi <sub>2</sub> | TPX               | <i>P</i> 3m1(164)              | —                              | —                 | 5.64  | 5.65               | 59.5           | —     | —     | —              | —                 | —                 | 0.040 | 0.850       | 0.0  | —     | 0.0   |
| NRb <sub>2</sub> | TXX               | <i>P</i> 3m1(164)              | —                              | —                 | 9.12  | 9.12               | 57.1           | —     | —     | —              | —                 | —                 | 0.850 | 1.934       | 4.1  | —     | —     |
| NSr <sub>2</sub> | TXX               | <i>P</i> 3m1(164)              | —                              | —                 | 7.71  | 7.71               | 60.0           | —     | —     | —              | —                 | —                 | 2.841 | 4.094       | 0.0  | —     | —     |
| NY <sub>2</sub>  | THX               | <i>P</i> 3m1(164)              | <i>P</i> 3m1(164)              | —                 | 6.89  | 6.90               | 60.1           | —     | —     | —              | —                 | —                 | 0.002 | 7.381       | 0.0  | 0.0   | —     |
| NZr <sub>2</sub> | TXX               | <i>P</i> 3m1(164)              | —                              | —                 | 6.46  | 6.48               | 60.1           | —     | —     | —              | —                 | —                 | 3.576 | 9.888       | 0.0  | —     | —     |
| NNb <sub>2</sub> | THX               | <i>P</i> 3m1(164)              | <i>P</i> 6m2(187)              | —                 | 6.29  | 6.29               | 60.1           | —     | —     | —              | —                 | —                 | 0.283 | 4.541       | 0.0  | —     | —     |
| NPd <sub>2</sub> | PXX               | —                              | —                              | —                 | —     | —                  | —              | —     | —     | —              | —                 | —                 | 2.012 | 2.055       | —    | —     | 0.0   |
| NCs <sub>2</sub> | TPX               | <i>P</i> 3m1(164)              | —                              | —                 | 9.48  | 9.47               | 56.1           | —     | —     | —              | —                 | —                 | 0.029 | 1.020       | 4.1  | —     | 4.0   |
| NHf <sub>2</sub> | TXX               | <i>P</i> 3m1(164)              | —                              | —                 | 6.34  | 6.36               | 60.1           | —     | —     | —              | —                 | —                 | 3.563 | 4.401       | 0.0  | —     | —     |
| NIa <sub>2</sub> | HTX               | —                              | <i>P</i> 6m2(187)              | —                 | 6.16  | 6.17               | 60.0           | —     | —     | —              | —                 | —                 | 0.657 | 2.060       | 0.0  | 0.0   | —     |
| NOs <sub>2</sub> | HXX               | —                              | <i>P</i> mc2 <sub>1</sub> (26) | —                 | —     | —                  | —              | —     | —     | —              | —                 | —                 | 2.289 | 3.111       | —    | —     | —     |
| NIr <sub>2</sub> | HXX               | —                              | <i>P</i> mm2 <sub>1</sub> (31) | —                 | —     | —                  | —              | —     | —     | —              | —                 | —                 | 1.975 | 4.578       | —    | —     | —     |
| NPt <sub>2</sub> | HXX               | —                              | <i>P</i> mm2 <sub>1</sub> (31) | —                 | —     | —                  | —              | —     | —     | —              | —                 | —                 | 1.617 | 2.099       | —    | —     | —     |
| NF <sub>b2</sub> | HTP               | <i>P</i> 3m1(164)              | <i>C</i> m(8)                  | —                 | 6.97  | 6.97               | 59.6           | —     | —     | —              | —                 | —                 | 0.027 | 0.306       | 0.0  | 0.0   | 0.0   |
| NBi <sub>2</sub> | HTP               | <i>P</i> 1(1)                  | <i>P</i> c(7)                  | —                 | 7.90  | 6.84               | 53.8           | —     | —     | —              | —                 | —                 | 0.405 | 0.811       | 0.0  | 0.0   | 0.0   |
| OLi <sub>2</sub> | TXX               | <i>P</i> 3m1(164)              | —                              | —                 | 6.19  | 6.21               | 60.0           | —     | —     | —              | —                 | —                 | 1.274 | 3.622       | 0.0  | —     | —     |
| OB <sub>e2</sub> | TXX               | —                              | —                              | —                 | 5.17  | 4.95               | 58.5           | —     | —     | —              | —                 | —                 | 1.114 | 3.420       | 0.0  | —     | —     |
| ONa <sub>2</sub> | TPX               | —                              | —                              | —                 | 7.52  | 7.53               | 59.4           | —     | —     | —              | —                 | —                 | 0.756 | 2.577       | 0.0  | —     | —     |
| OMg <sub>2</sub> | PTX               | <i>P</i> 3m1(164)              | —                              | —                 | 6.14  | 6.14               | 59.2           | —     | —     | —              | —                 | —                 | 0.770 | 1.747       | 0.0  | —     | —     |
| OAl <sub>2</sub> | HXX               | —                              | <i>P</i> mm2 <sub>1</sub> (31) | —                 | —     | —                  | —              | —     | —     | —              | —                 | —                 | 2.374 | 2.973       | —    | 0.0   | —     |
| OSi <sub>2</sub> | PXX               | —                              | —                              | —                 | —     | —                  | —              | —     | —     | —              | —                 | —                 | 1.102 | 2.497       | —    | —     | 0.0   |
| OK <sub>2</sub>  | TPX               | <i>P</i> 3m1(164)              | —                              | —                 | 8.26  | 8.27               | 59.3           | —     | —     | —              | —                 | —                 | 0.294 | 1.823       | 0.0  | —     | —     |
| OCa <sub>2</sub> | PXX               | —                              | —                              | —                 | —     | —                  | —              | —     | —     | —              | —                 | —                 | 1.945 | 2.182       | —    | —     | 0.0   |
| OSc <sub>2</sub> | TXX               | —                              | —                              | —                 | 6.38  | 6.39               | 60.0           | —     | —     | —              | —                 | —                 | 0.915 | 3.979       | 4.8  | —     | —     |
| OTi <sub>2</sub> | HTX               | <i>P</i> 3m1(164)              | <i>P</i> 6m2(187)              | —                 | 5.96  | 5.98               | 59.9           | —     | —     | —              | —                 | —                 | 0.164 | 1.350       | 0.0  | 0.0   | —     |
| OV <sub>2</sub>  | HTP               | <i>P</i> 3m1(164)              | —                              | —                 | 5.32  | 5.30               | 59.9           | —     | —     | —              | —                 | —                 | 0.555 | 0.671       | 0.0  | 0.0   | —     |
| OCr <sub>2</sub> | HTP               | <i>P</i> 3m1(164)              | <i>P</i> 6m2(187)              | —                 | 5.74  | 5.73               | 59.9           | —     | —     | —              | —                 | —                 | 0.403 | 0.650       | 29.1 | 0.0   | 31.9  |
| OF <sub>e2</sub> | PHT               | <i>P</i> 3m1(164)              | <i>P</i> 6m2(187)              | —                 | 5.37  | 5.37               | 59.8           | —     | —     | —              | —                 | —                 | 0.083 | 0.553       | 26.4 | 25.4  | 24.2  |
| ORB <sub>2</sub> | TXX               | <i>P</i> 3m1(164)              | —                              | —                 | 8.36  | 8.36               | 59.7           | —     | —     | —              | —                 | —                 | 1.533 | 1.866       | 0.0  | —     | —     |
| OSr <sub>2</sub> | PXX               | —                              | —                              | —                 | —     | —                  | —              | —     | —     | —              | —                 | —                 | 1.619 | 2.157       | —    | —     | 0.0   |
| OY <sub>2</sub>  | PXX               | —                              | —                              | —                 | —     | —                  | —              | —     | —     | —              | —                 | —                 | 0.988 | 0.991       | —    | —     | 0.0   |
| OZr <sub>2</sub> | THX               | <i>P</i> 2 <sub>1</sub> /m(11) | <i>P</i> 6m2(187)              | —                 | 6.46  | 6.45               | 57.9           | —     | —     | —              | —                 | —                 | 0.613 | 1.683       | 0.0  | 0.0   | —     |
| ONb <sub>2</sub> | HTX               | <i>P</i> 3m1(164)              | <i>P</i> 6m2(187)              | —                 | 5.84  | 5.85               | 57.8           | —     | —     | —              | —                 | —                 | 0.242 | 1.484       | 0.0  | 0.0   | —     |
| OMo <sub>2</sub> | TXX               | <i>P</i> 2 <sub>1</sub> /m(11) | —                              | —                 | 6.79  | 6.55               | 50.1           | —     | —     | —              | —                 | —                 | 1.871 | 7.775       | 0.0  | —     | —     |
| ORu <sub>2</sub> | HPX               | —                              | <i>P</i> 1(1)                  | —                 | —     | —                  | —              | —     | —     | —              | —                 | —                 | 0.143 | 0.846       | —    | —     | 0.0   |
| OLn <sub>2</sub> | THX               | <i>P</i> 3m1(164)              | <i>P</i> 6m2(187)              | —                 | 6.64  | 6.63               | 60.2           | —     | —     | —              | —                 | —                 | 0.488 | 2.401       | 0.0  | 0.0   | —     |
| OCs <sub>2</sub> | PTX               | <i>C</i> 2/m(12)               | —                              | —                 | 9.81  | 9.81               | 50.4           | —     | —     | —              | —                 | —                 | 0.733 | 1.339       | 0.0  | —     | 0.0   |
| OBa <sub>2</sub> | PXX               | —                              | —                              | —                 | —     | —                  | —              | —     | —     | —              | —                 | —                 | 2.125 | 2.135       | —    | —     | 0.0   |

(Continued on next page)

Table 1: List of stable structures

| species           | Initial structure indices | space group            |       |                        | lattice parameters |       |       |                |       |       | relative energy |                |                   | spin moment           |      |      |      |
|-------------------|---------------------------|------------------------|-------|------------------------|--------------------|-------|-------|----------------|-------|-------|-----------------|----------------|-------------------|-----------------------|------|------|------|
|                   |                           | T                      | H     | P                      | T                  |       |       | H              |       |       | P               |                |                   | [ $\mu_B$ /unit cell] |      |      |      |
|                   |                           | a [Å]                  | b [Å] | c [Å]                  | a [Å]              | b [Å] | c [Å] | $\gamma$ [deg] | a [Å] | b [Å] | c [Å]           | $\gamma$ [deg] | $\Delta E_1$ [eV] | $\Delta E_2$ [eV]     | T    | H    | P    |
| OH <sub>2</sub>   | PXX                       | —                      | —     | P1(1)                  | —                  | —     | —     | 5.03           | 8.37  | 91.0  | —               | 2.913          | 3.990             | —                     | —    | —    | 0.0  |
| OTa <sub>2</sub>  | PXX                       | —                      | —     | P1(1)                  | —                  | —     | —     | 7.81           | 7.79  | 59.9  | —               | 0.937          | 1.474             | —                     | —    | —    | 0.0  |
| OP <sub>2</sub>   | PHX                       | —                      | —     | P1(1)                  | —                  | —     | —     | 8.22           | 5.88  | 57.5  | —               | 0.128          | 2.842             | —                     | —    | 0.0  | 0.0  |
| OPt <sub>2</sub>  | PXX                       | —                      | —     | P2 <sub>1</sub> /m(11) | —                  | —     | —     | 7.29           | 7.30  | 98.4  | —               | 1.894          | 1.908             | —                     | —    | —    | 0.0  |
| OAl <sub>2</sub>  | THP                       | P2 <sub>1</sub> /m(11) | —     | —                      | 6.46               | 6.46  | 54.4  | 6.45           | 6.46  | 54.6  | —               | 0.035          | 0.733             | 0.0                   | 0.0  | 0.0  | 0.0  |
| OTl <sub>2</sub>  | THX                       | P3m1(164)              | —     | —                      | 7.40               | 7.39  | 58.7  | 7.17           | 7.16  | 59.4  | —               | 0.417          | 1.002             | 0.0                   | 0.0  | —    | —    |
| OPb <sub>2</sub>  | TXX                       | C222(21)               | —     | —                      | 7.28               | 6.85  | 57.6  | —              | —     | —     | —               | 1.078          | 4.459             | 0.0                   | —    | —    | —    |
| FLi <sub>2</sub>  | PHX                       | Pmmn(59)               | —     | —                      | —                  | —     | —     | 4.92           | 4.92  | 73.3  | —               | 0.134          | 1.185             | —                     | —    | —    | 0.0  |
| FNi <sub>2</sub>  | PTH                       | P6mm(65)               | —     | —                      | 7.04               | 7.03  | 59.0  | 6.84           | 6.85  | 59.1  | —               | 0.347          | 0.787             | 0.0                   | 0.0  | 0.0  | 0.0  |
| FK <sub>2</sub>   | P3m1(164)                 | P6mm(187)              | —     | —                      | 8.42               | 8.42  | 56.0  | 8.30           | 8.30  | 55.6  | —               | 0.070          | 0.574             | 0.0                   | 0.0  | 0.0  | 0.0  |
| FRb <sub>2</sub>  | PTH                       | C2/m(12)               | —     | —                      | 8.94               | 8.93  | 55.9  | 10.25          | 10.22 | 46.2  | —               | 0.007          | 0.138             | 0.0                   | 0.0  | 0.0  | 0.0  |
| FSr <sub>2</sub>  | HTX                       | P1(1)                  | —     | —                      | 8.16               | 9.88  | 54.2  | 8.63           | 8.62  | 60.6  | —               | 0.101          | 1.923             | 0.0                   | 0.0  | —    | —    |
| FCd <sub>2</sub>  | THX                       | P3m1(164)              | —     | —                      | 6.19               | 6.19  | 58.3  | 6.26           | 6.25  | 56.7  | —               | 0.085          | 1.061             | 0.0                   | 0.0  | —    | —    |
| FIn <sub>2</sub>  | THX                       | P6mm(187)              | —     | —                      | 6.56               | 6.56  | 60.2  | 6.54           | 6.54  | 60.1  | —               | 0.072          | 1.818             | 0.0                   | 0.0  | —    | —    |
| FTa <sub>2</sub>  | PXX                       | P6mm(187)              | —     | —                      | —                  | —     | —     | 5.99           | 5.71  | 62.9  | —               | 10.357         | 10.429            | —                     | —    | —    | 0.0  |
| FAu <sub>2</sub>  | PTH                       | Pmmn(59)               | —     | —                      | 4.95               | 4.95  | 72.4  | 5.86           | 4.96  | 53.7  | —               | 0.662          | 0.666             | 0.0                   | 0.0  | 0.0  | 0.0  |
| FTl <sub>2</sub>  | THX                       | P3m1(164)              | —     | —                      | 7.19               | 7.19  | 58.3  | 7.08           | 7.07  | 59.0  | —               | 0.183          | 2.788             | 0.0                   | 0.0  | —    | —    |
| NaN <sub>2</sub>  | THP                       | P6mm(187)              | —     | —                      | 8.21               | 8.27  | 59.1  | 7.59           | 7.59  | 56.0  | —               | 0.466          | 0.542             | 20.0                  | 20.0 | 20.0 | 20.0 |
| NaSi <sub>2</sub> | TPX                       | Cmmmm(65)              | —     | —                      | 12.29              | 12.29 | 36.3  | —              | —     | —     | —               | 0.281          | 6.475             | 0.0                   | —    | —    | —    |
| NaCl <sub>2</sub> | PTX                       | C2/m(12)               | —     | —                      | 8.40               | 10.16 | 51.8  | —              | —     | —     | —               | 0.731          | 0.955             | 4.0                   | —    | —    | 2.0  |
| NaGe <sub>2</sub> | HXX                       | Cmme(67)               | —     | —                      | —                  | —     | —     | 11.17          | 10.02 | 25.7  | —               | 2.678          | 3.000             | —                     | —    | —    | —    |
| NaBr <sub>2</sub> | PXX                       | —                      | —     | —                      | —                  | —     | —     | —              | —     | —     | —               | 1.067          | 1.295             | —                     | —    | —    | 0.0  |
| NaI <sub>2</sub>  | PXX                       | —                      | —     | —                      | —                  | —     | —     | —              | —     | —     | —               | 0.969          | 1.287             | —                     | —    | —    | 0.0  |
| NaAu <sub>2</sub> | HXX                       | —                      | —     | —                      | —                  | —     | —     | 5.81           | 9.01  | 38.3  | —               | 1.783          | 1.787             | —                     | —    | —    | 0.0  |
| MgO <sub>2</sub>  | HPX                       | Cmmmm(65)              | —     | —                      | —                  | —     | —     | 6.61           | 6.63  | 59.7  | —               | 0.056          | 4.414             | —                     | —    | —    | 0.0  |
| MgF <sub>2</sub>  | PTX                       | P2/c(13)               | —     | —                      | 6.29               | 6.29  | 59.8  | —              | —     | —     | —               | 0.003          | 3.879             | 0.0                   | —    | —    | 0.0  |
| MgSi <sub>2</sub> | HXX                       | P3m1(164)              | —     | —                      | —                  | —     | —     | 9.92           | 7.60  | 38.3  | —               | 1.732          | 2.165             | —                     | —    | —    | 0.0  |
| MgCl <sub>2</sub> | PTX                       | Pmma(51)               | —     | —                      | 7.42               | 7.42  | 59.5  | —              | —     | —     | —               | 0.049          | 2.430             | 0.0                   | —    | —    | 0.0  |
| MgSc <sub>2</sub> | HXX                       | P4/mmm(123)            | —     | —                      | —                  | —     | —     | 6.73           | 9.54  | 44.8  | —               | 3.061          | 9.615             | —                     | —    | —    | 0.0  |
| MgGe <sub>2</sub> | HXX                       | Pmma(51)               | —     | —                      | —                  | —     | —     | 10.26          | 8.38  | 33.9  | —               | 1.749          | 3.081             | —                     | —    | —    | 0.0  |
| MgBr <sub>2</sub> | TPX                       | —                      | —     | —                      | 7.81               | 7.82  | 59.5  | —              | —     | —     | —               | 0.005          | 2.072             | 0.0                   | —    | —    | 0.0  |
| MgRh <sub>2</sub> | THX                       | C2/m(12)               | —     | —                      | 9.63               | 9.64  | 33.2  | 9.07           | 9.07  | 33.3  | —               | 0.102          | 1.958             | 3.6                   | —    | —    | 0.0  |
| MgIn <sub>2</sub> | HXX                       | Amn(38)                | —     | —                      | —                  | —     | —     | 10.52          | 8.51  | 35.3  | —               | 2.379          | 2.923             | —                     | —    | —    | 0.0  |
| MgSn <sub>2</sub> | HXX                       | Pmmn(47)               | —     | —                      | —                  | —     | —     | 9.89           | 9.95  | 37.1  | —               | 1.742          | 2.456             | —                     | —    | —    | 0.0  |
| MgI <sub>2</sub>  | THX                       | Amn(38)                | —     | —                      | —                  | —     | —     | 8.44           | 8.44  | 59.5  | —               | 0.002          | 1.141             | —                     | —    | —    | 0.0  |
| MgBa <sub>2</sub> | PTH                       | P3m1(164)              | —     | —                      | 8.44               | 8.45  | 59.5  | 8.84           | 8.86  | 59.6  | —               | 0.101          | 0.322             | 0.0                   | 0.0  | 0.0  | 0.0  |
| MgI <sub>2</sub>  | HXX                       | Amn(38)                | —     | —                      | 11.05              | 8.90  | 51.5  | 9.92           | 9.91  | 28.9  | —               | 5.421          | 6.766             | —                     | —    | —    | 0.0  |
| AlBe <sub>2</sub> | TXX                       | Cm(8)                  | —     | —                      | 6.08               | 6.96  | 42.4  | —              | —     | —     | —               | 2.495          | 3.435             | —                     | —    | —    | 0.0  |
| AlB <sub>2</sub>  | THX                       | Pmmn(31)               | —     | —                      | 5.33               | 6.15  | 54.6  | 5.26           | 6.11  | 54.5  | —               | 0.066          | 1.212             | 0.0                   | 0.0  | —    | 0.0  |
| AlC <sub>2</sub>  | HTP                       | P1(1)                  | —     | —                      | 6.99               | 6.75  | 39.5  | 6.26           | 5.90  | 41.9  | —               | 0.144          | 0.327             | 0.0                   | 0.0  | —    | 0.0  |
| AlN <sub>2</sub>  | PXX                       | —                      | —     | —                      | —                  | —     | —     | —              | —     | —     | —               | 0.943          | 3.355             | —                     | —    | —    | 0.0  |
| AlO <sub>2</sub>  | TXX                       | —                      | —     | —                      | 5.71               | 5.71  | 64.4  | —              | —     | —     | —               | 2.061          | 2.775             | 4.0                   | —    | —    | —    |
| AlF <sub>2</sub>  | HFX                       | P1(1)                  | —     | —                      | 6.76               | 5.18  | 59.3  | 6.79           | 5.75  | 65.4  | —               | 0.168          | 2.742             | 0.0                   | 0.0  | —    | —    |
| AlAl <sub>2</sub> | THX                       | P4/mmm(123)            | —     | —                      | 5.51               | 5.51  | 62.7  | 5.48           | 5.48  | 87.5  | —               | 0.676          | 6.286             | 0.0                   | 0.0  | —    | —    |
| AlSi <sub>2</sub> | HFX                       | Pc(7)                  | —     | —                      | 7.44               | 7.78  | 56.2  | 7.02           | 7.35  | 54.3  | —               | 0.623          | 4.540             | 0.0                   | 0.0  | —    | —    |
| AlP <sub>2</sub>  | TXX                       | P1(2)                  | —     | —                      | 7.62               | 7.84  | 41.5  | —              | —     | —     | —               | 1.290          | 1.807             | 0.0                   | —    | —    | —    |
| AlS <sub>2</sub>  | PXX                       | P1(2)                  | —     | —                      | 11.42              | 10.98 | 43.8  | 9.37           | 9.78  | 61.1  | —               | 1.041          | 1.615             | —                     | —    | —    | 0.0  |
| AlK <sub>2</sub>  | HFX                       | Pmma(51)               | —     | —                      | —                  | —     | —     | 10.35          | 7.31  | 45.0  | —               | 0.706          | 6.459             | 0.0                   | 0.0  | —    | —    |
| AlC <sub>3</sub>  | HPX                       | P4/mmm(123)            | —     | —                      | —                  | —     | —     | 8.77           | 6.20  | 45.0  | —               | 0.024          | 2.832             | —                     | —    | —    | 0.0  |
| AlSc <sub>2</sub> | HXX                       | P4/mmm(123)            | —     | —                      | —                  | —     | —     | —              | —     | —     | —               | 1.330          | 1.376             | —                     | —    | —    | 0.0  |
| AlCr <sub>2</sub> | TXX                       | —                      | —     | —                      | 7.23               | 7.98  | 39.4  | —              | —     | —     | —               | 4.443          | 11.654            | 0.0                   | —    | —    | —    |
| AlGe <sub>2</sub> | HFX                       | Pc(7)                  | —     | —                      | 8.95               | 8.97  | 36.6  | 8.00           | 8.07  | 46.4  | —               | 0.389          | 5.203             | 0.0                   | 0.0  | —    | —    |
| AlSe <sub>2</sub> | TXX                       | —                      | —     | —                      | 7.29               | 7.29  | 49.9  | —              | —     | —     | —               | 2.444          | 2.936             | 0.0                   | —    | —    | —    |
| AlBr <sub>2</sub> | HXX                       | P2/c(13)               | —     | —                      | —                  | —     | —     | 11.39          | 7.31  | 65.4  | —               | 0.908          | 2.623             | —                     | —    | —    | 0.0  |
| AlRb <sub>2</sub> | THX                       | C2/m(12)               | —     | —                      | 11.40              | 11.84 | 44.1  | 10.18          | 13.18 | 40.0  | —               | 0.424          | 5.631             | 0.0                   | —    | —    | —    |
| AlSr <sub>2</sub> | HXX                       | Cmmmm(65)              | —     | —                      | —                  | —     | —     | 7.86           | 11.03 | 44.7  | —               | 2.095          | 2.108             | —                     | —    | —    | 0.0  |
| AlY <sub>2</sub>  | HXX                       | Pmmn(47)               | —     | —                      | —                  | —     | —     | 9.56           | 6.76  | 45.1  | —               | 0.888          | 4.155             | —                     | —    | —    | 0.0  |
|                   |                           | P4/mmm(123)            | —     | —                      | —                  | —     | —     | —              | —     | —     | —               | —              | —                 | —                     | —    | —    | —    |

(Continued on next page)

Table 1: List of stable structures

| species           | Initial structure indices | space group                  |                              |   | lattice parameters |       |       |                |                   |                   | relative energy |      |      | spin moment        |     |  |
|-------------------|---------------------------|------------------------------|------------------------------|---|--------------------|-------|-------|----------------|-------------------|-------------------|-----------------|------|------|--------------------|-----|--|
|                   |                           | T                            | H                            | P | a [Å]              | b [Å] | c [Å] | $\gamma$ [deg] | $\Delta E_1$ [eV] | $\Delta E_2$ [eV] | T               | H    | P    | $\mu_B$ /unit cell |     |  |
|                   |                           |                              |                              |   |                    |       |       |                |                   |                   |                 |      |      |                    |     |  |
| AlZr <sub>2</sub> | HXX                       |                              | <i>Pbcm</i> (57)             |   | 8.90               | 7.23  | 35.7  |                | 1.093             | 2.313             |                 |      |      | 0.0                | 0.0 |  |
| AlM <sub>2</sub>  | PHX                       |                              | <i>P2/c</i> (13)             |   | 7.39               | 10.20 | 30.8  |                | 0.309             | 0.821             |                 | 7.73 | 41.3 |                    | 0.0 |  |
| AlRu <sub>2</sub> | HXX                       |                              | <i>C2/m</i> (12)             |   | 7.72               | 6.69  | 43.7  |                | 7.612             | 8.751             |                 | 6.78 | 7.81 |                    | 0.0 |  |
| AlRh <sub>2</sub> | PHX                       |                              | <i>P4/mmm</i> (123)          |   | 7.78               | 5.50  | 45.0  |                | 0.265             | 1.125             |                 | 6.78 | 7.81 |                    | 0.0 |  |
| AlPd <sub>2</sub> | THX                       | <i>C2/m</i> (12)             | <i>P6mm</i> (187)            |   | 6.96               | 5.63  | 53.2  |                | 0.287             | 1.642             |                 | 6.78 | 7.81 |                    | 0.0 |  |
| AlAg <sub>2</sub> | THX                       | <i>C2/m</i> (12)             | <i>P4/mmm</i> (123)          |   | 7.19               | 8.24  | 43.0  |                | 0.366             | 3.429             |                 | 6.78 | 7.81 |                    | 0.0 |  |
| AlCd <sub>2</sub> | THX                       | <i>P2/c</i> (13)             | <i>P2/c</i> (13)             |   | 7.45               | 8.76  | 40.6  |                | 0.531             | 3.763             |                 | 6.78 | 7.81 |                    | 0.0 |  |
| AlIn <sub>2</sub> | THX                       | <i>P1</i> (1)                | <i>P1</i> (1)                |   | 6.16               | 7.74  | 50.9  |                | 0.041             | 5.934             |                 | 6.78 | 7.81 |                    | 0.0 |  |
| AlSn <sub>2</sub> | HXX                       |                              | <i>Amm2</i> (38)             |   | —                  | —     | —     |                | 1.491             | 5.250             |                 | 6.78 | 7.81 |                    | 0.0 |  |
| AlSb <sub>2</sub> | HXX                       |                              | <i>P6m2</i> (187)            |   | 10.18              | 8.75  | 44.0  |                | 0.176             | 0.251             |                 | 6.78 | 7.81 |                    | 0.0 |  |
| AlB <sub>2</sub>  | HPX                       |                              | <i>P4/mmm</i> (123)          |   | 11.80              | 8.34  | 45.0  |                | 0.688             | 2.324             |                 | 6.78 | 7.81 |                    | 0.0 |  |
| AlHf <sub>2</sub> | TXX                       |                              |                              |   | 7.70               | 7.69  | 45.9  |                | 2.870             | 4.085             |                 | 6.78 | 7.81 |                    | 0.0 |  |
| AlW <sub>2</sub>  | THP                       |                              | <i>P2/c</i> (13)             |   | 9.17               | 7.79  | 30.9  |                | 0.293             | 0.613             |                 | 6.78 | 7.81 |                    | 0.0 |  |
| AlIr <sub>2</sub> | HXX                       |                              | <i>C2/m</i> (12)             |   | 8.03               | 7.39  | 40.6  |                | 1.127             | 6.685             |                 | 6.78 | 7.81 |                    | 0.0 |  |
| AlPt <sub>2</sub> | THX                       |                              | <i>P6m2</i> (187)            |   | 7.81               | 6.82  | 42.6  |                | 0.212             | 6.625             |                 | 6.78 | 7.81 |                    | 0.0 |  |
| AlAu <sub>2</sub> | THX                       | <i>P4/mmm</i> (123)          | <i>P4/mmm</i> (123)          |   | 8.00               | 5.65  | 44.7  |                | 0.701             | 2.688             |                 | 6.78 | 7.81 |                    | 0.0 |  |
| AlHg <sub>2</sub> | THP                       | <i>C2/m</i> (12)             | <i>Pc</i> (7)                |   | 8.03               | 6.92  | 43.7  |                | 0.042             | 0.795             |                 | 6.78 | 7.81 |                    | 0.0 |  |
| AlTi <sub>2</sub> | HXX                       |                              | <i>Pm</i> (6)                |   | 7.10               | 7.12  | 55.6  |                | 1.199             | 2.662             |                 | 6.78 | 7.81 |                    | 0.0 |  |
| AlPb <sub>2</sub> | HXX                       |                              | <i>Amm2</i> (38)             |   | 8.86               | 8.86  | 46.7  |                | 1.361             | 2.072             |                 | 6.78 | 7.81 |                    | 0.0 |  |
| AlB <sub>2</sub>  | TXX                       |                              | <i>P1</i> (2)                |   | 9.06               | 8.59  | 43.3  |                | 1.782             | 1.864             |                 | 6.78 | 7.81 |                    | 0.0 |  |
| SiBe <sub>2</sub> | TXX                       |                              | <i>Cmme</i> (67)             |   | 7.70               | 7.03  | 29.8  |                | 2.089             | 5.750             |                 | 6.78 | 7.81 |                    | 0.0 |  |
| SiB <sub>2</sub>  | HTP                       |                              | <i>C2</i> (5)                |   | 7.35               | 7.35  | 48.3  |                | 6.88              | 6.87              |                 | 6.78 | 7.81 |                    | 0.0 |  |
| SiO <sub>2</sub>  | THP                       | <i>P3m1</i> (164)            | <i>P3m1</i> (164)            |   | 5.41               | 5.41  | 60.0  |                | 8.79              | 4.95              |                 | 6.78 | 7.81 |                    | 0.0 |  |
| SiNa <sub>2</sub> | PXX                       | <i>C2/m</i> (12)             | <i>C2/m</i> (12)             |   | 9.31               | 9.86  | 43.7  |                | 10.15             | 1.723             |                 | 6.78 | 7.81 |                    | 0.0 |  |
| SiAl <sub>2</sub> | HXX                       |                              | <i>Pmm2</i> (31)             |   | 7.52               | 7.52  | 41.7  |                | 2.678             | 4.125             |                 | 6.78 | 7.81 |                    | 0.0 |  |
| SiP <sub>2</sub>  | PHX                       |                              | <i>Cm</i> (8)                |   | 7.60               | 7.60  | 51.1  |                | 0.713             | 3.531             |                 | 6.78 | 7.81 |                    | 0.0 |  |
| SiS <sub>2</sub>  | THX                       |                              | <i>P4m2</i> (115)            |   | 6.62               | 6.62  | 60.0  |                | 0.016             | 2.884             |                 | 6.78 | 7.81 |                    | 0.0 |  |
| SiCl <sub>2</sub> | TPH                       | <i>P1</i> (2)                | <i>Amm2</i> (38)             |   | 7.11               | 9.49  | 72.3  |                | 0.153             | 0.713             |                 | 6.78 | 7.81 |                    | 0.0 |  |
| SiK <sub>2</sub>  | HXX                       |                              | <i>Amm2</i> (38)             |   | 9.44               | 9.44  | 59.8  |                | 3.611             | 3.632             |                 | 6.78 | 7.81 |                    | 0.0 |  |
| SiCa <sub>2</sub> | PXX                       |                              | <i>P3m1</i> (164)            |   | —                  | —     | —     |                | 0.000             | 2.665             |                 | 6.78 | 7.81 |                    | 0.0 |  |
| SiTi <sub>2</sub> | HXX                       |                              | <i>Cmmm</i> (65)             |   | —                  | —     | —     |                | 1.712             | 3.520             |                 | 6.78 | 7.81 |                    | 0.0 |  |
| SiGe <sub>2</sub> | HXX                       |                              | <i>P6m2</i> (187)            |   | 4.84               | 6.22  | 49.9  |                | 2.504             | 5.007             |                 | 6.78 | 7.81 |                    | 0.0 |  |
| SiB <sub>2</sub>  | TPX                       |                              | <i>P1</i> (2)                |   | 9.79               | 7.24  | 65.0  |                | 0.902             | 1.448             |                 | 6.78 | 7.81 |                    | 0.0 |  |
| SiRb <sub>2</sub> | HXX                       |                              | <i>Amm2</i> (38)             |   | 10.13              | 10.81 | 46.4  |                | 0.336             | 1.155             |                 | 6.78 | 7.81 |                    | 0.0 |  |
| SiSr <sub>2</sub> | PTX                       |                              | <i>P3m1</i> (164)            |   | 9.90               | 9.90  | 59.6  |                | 3.591             | 5.384             |                 | 6.78 | 7.81 |                    | 0.0 |  |
| SiZr <sub>2</sub> | HPT                       | <i>C2/m</i> (12)             | <i>C2/m</i> (12)             |   | 7.94               | 8.03  | 59.0  |                | 0.003             | 2.382             |                 | 6.78 | 7.81 |                    | 0.0 |  |
| SiPd <sub>2</sub> | HPT                       | <i>P2<sub>1</sub>/m</i> (11) | <i>P2<sub>1</sub>/m</i> (11) |   | 7.11               | 7.08  | 48.2  |                | 0.030             | 0.736             |                 | 6.78 | 7.81 |                    | 0.0 |  |
| SiSn <sub>2</sub> | HPX                       |                              | <i>P6m2</i> (187)            |   | —                  | —     | —     |                | 0.083             | 0.668             |                 | 6.78 | 7.81 |                    | 0.0 |  |
| SiI <sub>2</sub>  | TPX                       |                              | <i>P6m2</i> (187)            |   | 8.37               | 8.37  | 60.4  |                | 0.724             | 0.855             |                 | 6.78 | 7.81 |                    | 0.0 |  |
| SiC <sub>2</sub>  | PTX                       |                              | <i>P3m1</i> (164)            |   | 11.81              | 11.79 | 58.3  |                | 0.482             | 0.976             |                 | 6.78 | 7.81 |                    | 0.0 |  |
| SiBa <sub>2</sub> | PTX                       |                              | <i>P3m1</i> (164)            |   | 10.28              | 10.27 | 59.0  |                | 0.013             | 1.126             |                 | 6.78 | 7.81 |                    | 8.0 |  |
| SiPt <sub>2</sub> | THX                       | <i>C2/m</i> (12)             | <i>C2/m</i> (12)             |   | 6.46               | 6.49  | 52.7  |                | 0.013             | 1.590             |                 | 6.78 | 7.81 |                    | 0.0 |  |
| SiPb <sub>2</sub> | HPT                       | <i>P3m1</i> (164)            | <i>P6m2</i> (187)            |   | 8.80               | 8.80  | 58.1  |                | 0.390             | 1.688             |                 | 6.78 | 7.81 |                    | 0.0 |  |
| PLi <sub>2</sub>  | TXX                       |                              | <i>C2/m</i> (12)             |   | 8.24               | 8.01  | 42.9  |                | 1.238             | 3.853             |                 | 6.78 | 7.81 |                    | 0.0 |  |
| PEe <sub>2</sub>  | PXX                       |                              |                              |   | —                  | —     | —     |                | 2.887             | 4.350             |                 | 6.78 | 7.81 |                    | 0.0 |  |
| PNa <sub>2</sub>  | TXX                       |                              | <i>C2/m</i> (12)             |   | 9.39               | 9.01  | 43.0  |                | 0.865             | 2.517             |                 | 6.78 | 7.81 |                    | 0.0 |  |
| PAI <sub>2</sub>  | PXX                       |                              | <i>P1</i> (1)                |   | —                  | —     | —     |                | 0.725             | 0.921             |                 | 6.78 | 7.81 |                    | 0.0 |  |
| PSi <sub>2</sub>  | PHX                       |                              | <i>P2<sub>1</sub>/m</i> (11) |   | 7.23               | 6.55  | 60.2  |                | 1.687             | 4.190             |                 | 6.78 | 7.81 |                    | 0.0 |  |
| PP <sub>2</sub>   | HPX                       |                              | <i>P1</i> (1)                |   | 6.57               | 6.49  | 60.8  |                | 0.183             | 2.348             |                 | 6.78 | 7.81 |                    | 0.0 |  |
| PCl <sub>2</sub>  | TXX                       |                              | <i>Pc</i> (7)                |   | 6.59               | 6.59  | 60.3  |                | 1.396             | 1.559             |                 | 6.78 | 7.81 |                    | 0.0 |  |
| PK <sub>2</sub>   | PTX                       |                              | <i>P3m1</i> (164)            |   | 8.05               | 10.81 | 55.7  |                | 0.248             | 3.548             |                 | 6.78 | 7.81 |                    | 0.0 |  |
| PCa <sub>2</sub>  | PTX                       |                              | <i>P3m1</i> (164)            |   | 10.24              | 10.24 | 58.2  |                | 0.031             | 1.049             |                 | 6.78 | 7.81 |                    | 4.0 |  |
| PSc <sub>2</sub>  | PTX                       |                              | <i>P3m1</i> (164)            |   | 8.42               | 8.42  | 59.9  |                | 0.082             | 1.612             |                 | 6.78 | 7.81 |                    | 0.0 |  |
| PTi <sub>2</sub>  | PXX                       |                              | <i>P2<sub>1</sub>/m</i> (11) |   | 7.57               | 7.30  | 61.2  |                | 0.000             | 2.459             |                 | 6.78 | 7.81 |                    | 0.0 |  |
| PV <sub>2</sub>   | TXX                       |                              | <i>P2<sub>1</sub>/m</i> (11) |   | 6.91               | 6.13  | 63.4  |                | 0.856             | 3.023             |                 | 6.78 | 7.81 |                    | 0.0 |  |
|                   |                           |                              |                              |   | —                  | —     | —     |                | 3.931             | 5.400             |                 | 6.78 | 7.81 |                    | 0.0 |  |

(Continued on next page)

Table 1: List of stable structures

| species           | Initial structure |               | space group       |                    |       | lattice parameters |                |       |       |                |       | relative energy   |                   |                            | spin moment |                |      |      |
|-------------------|-------------------|---------------|-------------------|--------------------|-------|--------------------|----------------|-------|-------|----------------|-------|-------------------|-------------------|----------------------------|-------------|----------------|------|------|
|                   | indices           | T             | H                 | P                  | T     |                    |                | H     |       |                | P     | $\Delta E_1$ [eV] | $\Delta E_2$ [eV] | $[\mu_B/\text{unit cell}]$ |             |                |      |      |
|                   |                   |               |                   |                    | a [Å] | b [Å]              | $\gamma$ [deg] | a [Å] | b [Å] | $\gamma$ [deg] |       |                   |                   | a [Å]                      | b [Å]       | $\gamma$ [deg] | T    | H    |
| PCr <sub>2</sub>  | TPX               | $P2_1/m(11)$  | —                 | $Pm\bar{m}m(59)$   | 7.17  | 7.04               | 60.5           | —     | —     | —              | 6.76  | 7.40              | 56.7              | 0.187                      | 2.486       | 27.8           | —    | 27.4 |
| PMn <sub>2</sub>  | TXX               | $P2_1/m(11)$  | —                 | —                  | 6.78  | 6.77               | 57.9           | —     | —     | —              | —     | —                 | —                 | 2.465                      | 6.119       | 23.4           | —    | —    |
| PFer <sub>2</sub> | THX               | $P3m1(164)$   | $P\bar{6}m2(187)$ | —                  | 7.94  | 7.94               | 60.0           | 5.69  | 5.67  | 59.9           | —     | —                 | —                 | 0.202                      | 1.151       | 18.0           | 11.8 | —    |
| PCo <sub>2</sub>  | TXX               | $P2_1/m(11)$  | —                 | —                  | 6.46  | 6.46               | 47.9           | —     | —     | —              | —     | —                 | —                 | 2.829                      | 4.078       | 7.8            | —    | —    |
| PNi <sub>2</sub>  | PTX               | $P2_1/m(11)$  | —                 | $P2_1/m(11)$       | 6.63  | 6.63               | 58.5           | —     | —     | —              | 7.00  | 6.53              | 57.0              | 0.214                      | 2.323       | 0.0            | —    | 0.0  |
| PGe <sub>2</sub>  | PHT               | $P2_1/m(11)$  | $P\bar{6}m2(187)$ | $Cm(8)$            | 6.75  | 6.75               | 59.4           | 7.03  | 7.40  | 58.4           | 8.92  | 8.89              | 52.0              | 0.002                      | 0.320       | 0.0            | 0.0  | 0.0  |
| PSe <sub>2</sub>  | TXX               | $P3m1(164)$   | —                 | —                  | 6.99  | 6.99               | 60.0           | —     | —     | —              | —     | —                 | —                 | 0.943                      | 2.920       | 0.0            | —    | —    |
| PRb <sub>2</sub>  | TPX               | $P3m1(164)$   | —                 | $Pm\bar{m}m(59)$   | 10.75 | 10.76              | 58.1           | —     | —     | —              | 10.20 | 10.44             | 60.0              | 0.295                      | 0.931       | 4.0            | —    | 4.0  |
| PSr <sub>2</sub>  | PTX               | $P3m1(164)$   | —                 | $P2_1/m(11)$       | 8.94  | 8.94               | 59.4           | —     | —     | —              | 8.93  | 8.92              | 59.7              | 0.005                      | 1.668       | 0.0            | —    | 0.0  |
| PY <sub>2</sub>   | TPX               | $P3m1(164)$   | —                 | $P3m1(164)$        | 7.63  | 7.63               | 60.0           | —     | —     | —              | 7.64  | 7.63              | 60.0              | 0.037                      | 2.802       | 0.0            | —    | 0.0  |
| PNb <sub>2</sub>  | TXX               | $P2_1/m(11)$  | —                 | —                  | 6.68  | 7.58               | 63.8           | —     | —     | —              | —     | —                 | —                 | 2.057                      | 4.823       | 0.0            | —    | —    |
| PMo <sub>2</sub>  | TXX               | $P2_1/m(11)$  | —                 | —                  | 7.24  | 7.24               | 49.2           | —     | —     | —              | —     | —                 | —                 | 3.085                      | 3.334       | 0.0            | —    | —    |
| PTc <sub>2</sub>  | TXX               | $P2_1/m(11)$  | —                 | —                  | 7.10  | 5.63               | 66.6           | —     | —     | —              | —     | —                 | —                 | 1.103                      | 4.425       | 0.0            | —    | —    |
| PRu <sub>2</sub>  | PTX               | $P2_1/m(11)$  | —                 | —                  | 7.02  | 7.02               | 47.1           | —     | —     | —              | —     | —                 | —                 | 1.103                      | 4.425       | 0.0            | —    | —    |
| PRh <sub>2</sub>  | PTX               | $P2_1/m(11)$  | —                 | $Pm\bar{m}m(59)$   | 7.21  | 6.95               | 58.7           | —     | —     | —              | 9.06  | 7.11              | 38.3              | 0.760                      | 1.307       | 0.0            | —    | 0.0  |
| PPd <sub>2</sub>  | PTX               | $P2_1/m(11)$  | —                 | $P\bar{1}(2)$      | 7.19  | 7.19               | 60.5           | —     | —     | —              | 7.29  | 7.27              | 56.1              | 0.089                      | 1.098       | 0.0            | —    | 0.0  |
| PAg <sub>2</sub>  | HPX               | —             | $P2/c(13)$        | $Cm(8)$            | —     | —                  | —              | 7.99  | 7.19  | 43.5           | 7.91  | 8.54              | 61.8              | 0.677                      | 1.887       | 0.0            | —    | 0.0  |
| PCd <sub>2</sub>  | HPX               | —             | $Aem2(39)$        | —                  | —     | —                  | —              | 7.24  | 7.25  | 63.0           | 8.33  | 11.24             | 55.2              | 0.111                      | 1.459       | 0.0            | —    | 0.0  |
| PSn <sub>2</sub>  | THX               | $P3m1(164)$   | $P\bar{6}m2(187)$ | $C2/m(12)$         | 7.39  | 7.39               | 59.6           | —     | —     | —              | —     | —                 | —                 | 0.222                      | 1.592       | 0.0            | —    | 0.0  |
| PTe <sub>2</sub>  | TXX               | $P3m1(164)$   | —                 | —                  | 7.50  | 7.51               | 59.8           | —     | —     | —              | —     | —                 | —                 | 1.708                      | 1.971       | 0.0            | —    | —    |
| PL <sub>2</sub>   | HXX               | —             | $P2/m(10)$        | —                  | —     | —                  | —              | 9.55  | 9.95  | 51.9           | —     | —                 | —                 | 2.502                      | 2.885       | —              | —    | —    |
| PCs <sub>2</sub>  | PTX               | $P3m1(164)$   | —                 | $P3m1(164)$        | 11.24 | 11.25              | 58.4           | —     | —     | —              | 11.05 | 11.06             | 59.4              | 0.013                      | 0.944       | 4.0            | —    | 4.0  |
| PBa <sub>2</sub>  | PTX               | $P3m1(164)$   | —                 | $P3m1(164)$        | 9.32  | 9.31               | 59.4           | —     | —     | —              | 9.26  | 12.25             | 40.9              | 0.103                      | 1.678       | 0.0            | —    | 2.6  |
| PHf <sub>2</sub>  | PTX               | $P2_1/m(11)$  | —                 | $P2_1/m(11)$       | 7.69  | 7.70               | 52.4           | —     | —     | —              | 7.83  | 6.91              | 63.8              | 0.077                      | 1.660       | 0.0            | —    | 0.0  |
| PTb <sub>2</sub>  | HTP               | $P2_1/m(11)$  | —                 | $Pm\bar{m}2_1(31)$ | 6.86  | 6.86               | 49.2           | 6.44  | 6.44  | 53.1           | 9.12  | 9.79              | 43.4              | 0.060                      | 0.541       | 0.0            | —    | 0.0  |
| PTl <sub>2</sub>  | TPH               | $P3m1(164)$   | $P\bar{6}m2(187)$ | $P\bar{1}(2)$      | 8.73  | 8.73               | 59.5           | 8.33  | 8.33  | 59.3           | 9.18  | 7.67              | 76.7              | 0.359                      | 0.726       | 0.0            | —    | 0.0  |
| PPb <sub>2</sub>  | THX               | $P3m1(164)$   | $P\bar{6}m2(187)$ | —                  | 7.71  | 7.72               | 59.6           | 7.93  | 7.92  | 59.4           | —     | —                 | —                 | 0.271                      | 1.080       | 0.0            | —    | 0.0  |
| SLi <sub>2</sub>  | TPX               | $P3m1(164)$   | —                 | $P3m1(164)$        | 7.89  | 7.87               | 59.8           | —     | —     | —              | 7.86  | 7.86              | 59.9              | 0.025                      | 2.651       | 0.0            | —    | 0.0  |
| SBe <sub>2</sub>  | PXX               | —             | —                 | $P2_1/m(11)$       | —     | —                  | —              | —     | —     | —              | 6.83  | 5.30              | 90.0              | 2.333                      | 4.987       | —              | —    | 0.0  |
| SNa <sub>2</sub>  | PTX               | $P3m1(164)$   | —                 | $P3m1(164)$        | 9.01  | 9.02               | 59.5           | —     | —     | —              | 9.02  | 9.03              | 59.6              | 0.033                      | 2.464       | 0.0            | —    | 0.0  |
| SAl <sub>2</sub>  | PXX               | —             | —                 | $P1(1)$            | —     | —                  | —              | —     | —     | —              | 8.09  | 7.99              | 54.2              | 2.727                      | 2.786       | —              | —    | 0.0  |
| SS <sub>2</sub>   | HXX               | —             | $Pc(7)$           | —                  | —     | —                  | —              | 8.20  | 11.18 | 43.5           | —     | —                 | —                 | 2.451                      | 2.703       | —              | —    | 0.0  |
| SCL <sub>2</sub>  | HTP               | $P\bar{1}(2)$ | $P1(1)$           | $P2/c(13)$         | 7.47  | 8.27               | 78.4           | 7.16  | 9.40  | 96.0           | 9.96  | 10.57             | 96.2              | 0.379                      | 0.641       | 0.0            | —    | 0.0  |
| SK <sub>2</sub>   | PTX               | $P3m1(164)$   | —                 | $P3m1(164)$        | 10.17 | 10.17              | 57.5           | —     | —     | —              | 9.92  | 9.91              | 59.6              | 0.063                      | 1.948       | 0.0            | —    | 0.0  |
| SCa <sub>2</sub>  | THX               | $P3m1(164)$   | $P\bar{6}m2(187)$ | —                  | 7.82  | 7.81               | 60.0           | 7.73  | 7.73  | 59.8           | 6.95  | 6.98              | 60.2              | 0.798                      | 2.382       | 0.4            | —    | —    |
| SSc <sub>2</sub>  | TPH               | $P3m1(164)$   | $P\bar{6}m2(187)$ | $P3m1(156)$        | 7.04  | 7.03               | 60.0           | 6.79  | 6.79  | 60.0           | 6.57  | 7.29              | 63.1              | 0.224                      | 0.717       | 0.0            | —    | 0.0  |
| STl <sub>2</sub>  | PTX               | $P2_1/m(11)$  | —                 | $P2_1/m(11)$       | 6.56  | 7.28               | 63.1           | —     | —     | —              | 6.95  | 6.89              | 53.1              | 0.014                      | 3.411       | 0.0            | —    | 0.0  |
| SV <sub>2</sub>   | PTX               | $P2_1/m(11)$  | —                 | $P2_1/m(11)$       | 6.89  | 6.89               | 53.0           | —     | —     | —              | 6.89  | 6.89              | 53.1              | 0.008                      | 5.997       | 0.0            | —    | 0.0  |
| SGe <sub>2</sub>  | HTP               | $P1(1)$       | $P1(1)$           | $P1(1)$            | 6.73  | 6.89               | 60.9           | 6.72  | 6.90  | 60.6           | 8.81  | 11.67             | 41.4              | 0.002                      | 0.771       | 0.0            | —    | 0.0  |
| SSe <sub>2</sub>  | HPX               | —             | $Pc(7)$           | —                  | —     | —                  | —              | 8.81  | 11.67 | 41.4           | 8.54  | 8.91              | 76.9              | 0.744                      | 2.519       | —              | —    | 0.0  |
| SBz <sub>2</sub>  | THP               | $P2_1/c(14)$  | $Pm(6)$           | $P1(1)$            | 8.48  | 8.48               | 73.3           | 7.93  | 8.36  | 65.1           | 11.15 | 11.13             | 72.1              | 0.222                      | 0.350       | 0.0            | —    | 0.0  |
| SRb <sub>2</sub>  | PTX               | $P3m1(164)$   | —                 | $P3m1(164)$        | 10.37 | 10.37              | 59.1           | —     | —     | —              | 10.21 | 10.23             | 60.1              | 0.019                      | 1.635       | 0.0            | —    | 0.0  |
| SSr <sub>2</sub>  | TXX               | $P3m1(164)$   | —                 | —                  | 8.35  | 8.35               | 59.7           | —     | —     | —              | —     | —                 | —                 | 0.977                      | 2.337       | 0.0            | —    | 0.0  |
| SY <sub>2</sub>   | PTX               | $P3m1(164)$   | —                 | $P\bar{1}(2)$      | 7.49  | 7.49               | 59.9           | —     | —     | —              | 8.89  | 7.20              | 54.2              | 0.273                      | 1.130       | 0.0            | —    | 0.0  |
| SZr <sub>2</sub>  | PXX               | $P3m1(164)$   | —                 | $P2_1/m(11)$       | —     | —                  | —              | 7.97  | 7.04  | —              | 7.97  | 7.04              | 63.8              | 1.250                      | 2.169       | —              | —    | 0.0  |
| SNb <sub>2</sub>  | TXX               | $P\bar{1}(2)$ | —                 | —                  | 7.56  | 7.30               | 50.3           | —     | —     | —              | —     | —                 | —                 | 1.868                      | 3.667       | 0.0            | —    | —    |
| STc <sub>2</sub>  | PXX               | —             | —                 | $P\bar{1}(2)$      | —     | —                  | —              | —     | —     | —              | 4.62  | 6.99              | 64.7              | 4.769                      | 11.245      | —              | —    | 0.0  |
| SSn <sub>2</sub>  | TPH               | $P3m1(164)$   | $P\bar{6}m2(187)$ | $P1(1)$            | 7.14  | 7.16               | 59.7           | 7.02  | 7.02  | 59.1           | 8.69  | 8.33              | 85.7              | 0.037                      | 0.309       | 0.0            | —    | 0.0  |
| SL <sub>2</sub>   | HPT               | $P1(1)$       | $Amm2(38)$        | $P\bar{1}(2)$      | 7.91  | 9.57               | 75.7           | 7.96  | 9.56  | 64.8           | 9.98  | 12.93             | 55.3              | 0.019                      | 0.038       | 0.0            | —    | 0.0  |
| SCs <sub>2</sub>  | PTX               | $P3m1(164)$   | —                 | $P3m1(164)$        | 10.67 | 10.69              | 58.8           | —     | —     | —              | 10.51 | 10.52             | 59.8              | 0.020                      | 1.312       | 0.0            | —    | 0.0  |
| SBa <sub>2</sub>  | TXX               | $P3m1(164)$   | —                 | —                  | 8.84  | 8.84               | 59.6           | —     | —     | —              | —     | —                 | —                 | 1.845                      | 2.529       | 0.0            | —    | —    |
| SAn <sub>2</sub>  | TXX               | $P42_1(90)$   | —                 | —                  | 8.04  | 11.46              | 44.3           | —     | —     | —              | —     | —                 | —                 | 1.498                      | 2.257       | 0.0            | —    | —    |
| STl <sub>2</sub>  | TPH               | $P3m1(164)$   | $P\bar{6}m2(187)$ | $P3m1(164)$        | 8.54  | 8.54               | 59.0           | 8.33  | 8.33  | 59.4           | 8.62  | 8.54              | 58.5              | 0.008                      | 0.169       | 0.0            | —    | 0.0  |
| SPb <sub>2</sub>  | PHT               | $P3m1(164)$   | $Pm\bar{m}m(59)$  | —                  | 7.45  | 7.44               | 59.7           | 7.54  | 6.88  | 56.4           | 10.21 | 10.26             | 43.9              | 0.289                      | 0.527       | 0.0            | —    | 0.0  |
| SBi <sub>2</sub>  | PXX               | —             | —                 | $P2_1/m(11)$       | —     | —                  | —              | —     | —     | —              | 9.73  | 10.66             | 56.2              | 1.536                      | 1.745       | —              | —    | 0.0  |
| ClCl <sub>2</sub> | PHX               | —             | $P1(1)$           | $P2/c(13)$         | —     | —                  | —              | 10.28 | 6.52  | 94.6           | 10.76 | 10.84             | 98.2              | 0.715                      | 2.022       | —              | —    | 0.0  |
| ClK <sub>2</sub>  | TPH               | $P3m1(164)$   | $P\bar{6}m2(187)$ | —                  | 9.24  | 9.26               | 57.9           | 9.08  | 9.10  | 57.3           | 10.37 | 10.65             | 89.6              | 0.130                      | 0.236       | 0.0            | —    | 0.0  |

(Continued on next page)

Table 1: List of stable structures

| species           | Initial structure |                   | space group       |                |       | lattice parameters |                |       | relative energy |                |                   | spin moment       |                       |       |                |      |
|-------------------|-------------------|-------------------|-------------------|----------------|-------|--------------------|----------------|-------|-----------------|----------------|-------------------|-------------------|-----------------------|-------|----------------|------|
|                   | indices           | T                 | H                 | P              | T     |                    |                | H     |                 |                | $\Delta E_1$ [eV] | $\Delta E_2$ [eV] | [ $\mu_B$ /unit cell] |       |                |      |
|                   |                   |                   |                   |                | a [Å] | b [Å]              | $\gamma$ [deg] | a [Å] | b [Å]           | $\gamma$ [deg] |                   |                   | a [Å]                 | b [Å] | $\gamma$ [deg] | T    |
| ClCa <sub>2</sub> | THX               | $P\bar{3}m1(164)$ | $P\bar{6}m2(187)$ | —              | 7.63  | 7.62               | 59.7           | 7.59  | 7.59            | 59.7           | —                 | 0.303             | 1.497                 | 0.0   | 0.0            | —    |
| ClSc <sub>2</sub> | PXX               | —                 | $P1(1)$           | $P1(1)$        | —     | —                  | —              | —     | —               | —              | —                 | 5.835             | 6.699                 | —     | —              | 0.0  |
| ClBr <sub>2</sub> | PHX               | —                 | $P\bar{6}m2(187)$ | $P2/c(13)$     | —     | —                  | —              | —     | —               | —              | —                 | 0.159             | 2.528                 | —     | —              | 0.0  |
| ClRb <sub>2</sub> | THP               | $P\bar{3}m1(164)$ | $P\bar{6}m2(187)$ | $P1(1)$        | 9.82  | 9.83               | 58.0           | 8.78  | 7.23            | 80.9           | 6.41              | 6.73              | 73.6                  | 2.528 | 0.0            | 0.0  |
| ClS <sub>2</sub>  | THX               | $P3m1(164)$       | $P\bar{6}m2(187)$ | —              | 8.25  | 8.24               | 59.6           | 8.33  | 9.71            | 56.6           | 10.62             | 10.63             | 94.8                  | 0.393 | 0.0            | 0.0  |
| ClY <sub>2</sub>  | HPT               | $P3m1(164)$       | $P\bar{6}m2(187)$ | $P2_12_12(18)$ | 7.08  | 7.08               | 60.1           | 7.05  | 7.04            | 60.1           | —                 | 11.99             | 91.3                  | 2.532 | 0.0            | —    |
| ClIn <sub>2</sub> | THP               | $P\bar{3}m1(164)$ | $P\bar{6}m2(187)$ | $P1(1)$        | 7.02  | 7.02               | 60.6           | 6.97  | 6.98            | 60.4           | 8.72              | 8.72              | 81.4                  | 0.622 | 0.0            | 0.0  |
| ClSn <sub>2</sub> | PHX               | —                 | $Amm2(38)$        | $P1(1)$        | —     | —                  | —              | 6.81  | 6.81            | 59.8           | 10.11             | 7.62              | 85.3                  | 0.467 | 0.0            | 0.0  |
| ClCs <sub>2</sub> | TPH               | $P\bar{3}m1(164)$ | $Amm2(38)$        | $P1(1)$        | 10.58 | 10.58              | 56.8           | 10.64 | 10.65           | 54.1           | 8.91              | 9.05              | 65.3                  | 0.211 | 0.0            | 0.0  |
| ClBa <sub>2</sub> | TPH               | $P\bar{3}m1(164)$ | $P\bar{6}m2(187)$ | $Pmna(53)$     | 8.71  | 8.71               | 59.9           | 8.57  | 8.57            | 59.8           | 11.64             | 10.89             | 78.7                  | 0.183 | 0.0            | 0.0  |
| ClTi <sub>2</sub> | THX               | $P\bar{3}m1(164)$ | $Amm2(38)$        | —              | 7.71  | 7.69               | 57.7           | 7.69  | 7.67            | 55.8           | 12.62             | 7.36              | 90.0                  | 0.026 | 0.0            | 0.9  |
| ClPb <sub>2</sub> | PXX               | —                 | —                 | $P1(1)$        | —     | —                  | —              | —     | —               | —              | 6.71              | 13.42             | 46.4                  | 0.235 | 0.0            | 0.0  |
| KN <sub>2</sub>   | TPX               | $P\bar{3}m1(164)$ | $P\bar{6}m2(187)$ | $P6/mmm(191)$  | 9.79  | 10.30              | 58.5           | —     | —               | —              | 10.07             | 10.07             | 61.7                  | 1.535 | —              | 0.0  |
| KF <sub>2</sub>   | THX               | $P4mm(99)$        | $P\bar{6}m2(187)$ | —              | 7.36  | 10.45              | 44.6           | 8.83  | 8.81            | 56.8           | —                 | 0.006             | 1.103                 | 20.0  | —              | 20.0 |
| KS <sub>2</sub>   | PXX               | —                 | —                 | $P2/c(13)$     | —     | —                  | —              | —     | —               | —              | 11.24             | 11.25             | 39.7                  | 0.434 | 1.186          | 4.0  |
| KS <sub>2</sub>   | TPX               | $P\bar{1}(2)$     | —                 | $P\bar{1}(2)$  | 10.37 | 12.11              | 38.8           | —     | —               | —              | 7.57              | 12.14             | 57.7                  | 3.311 | 9.007          | —    |
| KCl <sub>2</sub>  | THX               | $P4/mmm(123)$     | $P\bar{6}m2(187)$ | —              | 8.54  | 12.06              | 45.0           | —     | —               | —              | 10.13             | 10.20             | 57.7                  | 0.016 | 1.904          | —    |
| KS <sub>2</sub>   | PXX               | $C2/m(12)$        | —                 | $P1(2)$        | 12.40 | 12.43              | 41.7           | —     | —               | —              | 12.07             | 10.58             | 41.8                  | 0.294 | 1.368          | 4.0  |
| KBr <sub>2</sub>  | PTX               | $P4/mmm(123)$     | —                 | $P2/m(10)$     | 9.94  | 9.94               | 53.0           | —     | —               | —              | 12.65             | 12.78             | 57.8                  | 0.400 | 1.789          | 0.0  |
| KSr <sub>2</sub>  | HXX               | —                 | $P1(1)$           | —              | —     | —                  | —              | 14.90 | 12.22           | 34.9           | —                 | —                 | —                     | 0.683 | 1.014          | —    |
| KA <sub>2</sub>   | HXX               | —                 | $Aem2(39)$        | —              | —     | —                  | —              | 13.20 | 12.24           | 20.9           | —                 | —                 | —                     | 4.308 | 4.310          | —    |
| KSr <sub>2</sub>  | PXX               | —                 | —                 | $P\bar{1}(2)$  | —     | —                  | —              | —     | —               | —              | 12.42             | 12.46             | 43.5                  | 2.265 | 2.295          | —    |
| KBa <sub>2</sub>  | TPH               | $P2/c(13)$        | $Amm2(38)$        | $P2/m(10)$     | 10.94 | 10.95              | 53.3           | 11.37 | 11.37           | 56.3           | —                 | —                 | —                     | 1.599 | 6.654          | —    |
| KBa <sub>2</sub>  | HXX               | —                 | $Amm2(38)$        | —              | —     | —                  | —              | 14.40 | 14.44           | 34.8           | 13.32             | 13.26             | 56.3                  | 0.171 | 0.227          | 4.0  |
| KBi <sub>2</sub>  | HXX               | —                 | $P2/c(13)$        | —              | —     | —                  | —              | 12.35 | 14.81           | 29.2           | —                 | —                 | —                     | 1.099 | 1.172          | —    |
| CaB <sub>2</sub>  | TPX               | $Pmna(51)$        | —                 | $P\bar{1}(2)$  | 8.29  | 10.25              | 35.9           | —     | —               | —              | 8.26              | 10.19             | 36.0                  | 1.424 | 3.286          | —    |
| CaN <sub>2</sub>  | PXX               | —                 | $P\bar{6}m2(187)$ | $Pmnm(59)$     | —     | —                  | —              | 6.42  | 10.52           | 34.3           | —                 | —                 | —                     | 0.005 | 15.069         | 0.0  |
| CaO <sub>2</sub>  | PHX               | —                 | $P\bar{6}m2(187)$ | $P4/mmm(123)$  | —     | —                  | —              | 7.49  | 7.48            | 60.6           | 6.97              | 7.94              | 55.9                  | 2.686 | 21.815         | —    |
| CaF <sub>2</sub>  | PTX               | $P\bar{3}m1(164)$ | —                 | $P3m1(164)$    | 7.24  | 7.25               | 60.0           | —     | —               | —              | 6.41              | 7.17              | 63.4                  | 0.615 | 7.585          | —    |
| CaSi <sub>2</sub> | TPX               | $C2/m(12)$        | —                 | $Pmnm(59)$     | 11.52 | 11.52              | 39.0           | —     | —               | —              | 7.24              | 7.24              | 63.4                  | 0.028 | 3.153          | 0.0  |
| CaS <sub>2</sub>  | PHX               | $P\bar{3}m1(164)$ | $P\bar{6}m2(187)$ | $P4/mmm(123)$  | —     | —                  | —              | 9.02  | 9.01            | 58.4           | 11.42             | 11.42             | 39.4                  | 0.030 | 5.564          | 0.0  |
| CaCl <sub>2</sub> | PTX               | —                 | $P2/m(10)$        | $P3m1(164)$    | 8.29  | 8.29               | 60.0           | —     | —               | —              | 8.58              | 7.66              | 63.3                  | 0.388 | 7.064          | —    |
| CaK <sub>2</sub>  | HXX               | —                 | $C'mmm(65)$       | —              | —     | —                  | —              | 8.35  | 13.97           | 33.5           | —                 | —                 | —                     | 0.001 | 1.980          | 0.0  |
| CaCr <sub>2</sub> | HXX               | —                 | $C'mmm(65)$       | —              | —     | —                  | —              | 6.42  | 10.52           | 34.3           | —                 | —                 | —                     | 4.431 | 4.483          | —    |
| CaGe <sub>2</sub> | TPX               | $C2/m(12)$        | $P\bar{6}m2(187)$ | $Pmnm(59)$     | 11.48 | 11.48              | 40.7           | —     | —               | —              | 11.27             | 11.27             | 41.4                  | 3.709 | 3.723          | —    |
| CaSe <sub>2</sub> | THX               | $P4/mmm(123)$     | $P\bar{6}m2(187)$ | —              | 8.00  | 11.36              | 44.9           | 9.37  | 9.38            | 58.2           | —                 | —                 | —                     | 0.007 | 4.591          | 0.0  |
| CaBr <sub>2</sub> | PTX               | $P\bar{3}m1(164)$ | —                 | $P3m1(164)$    | 8.62  | 8.61               | 59.4           | —     | —               | —              | 8.55              | 8.55              | 59.9                  | 0.335 | 1.768          | 0.0  |
| CaRb <sub>2</sub> | HXX               | —                 | $C'mmm(65)$       | —              | —     | —                  | —              | 13.13 | 8.80            | 41.5           | —                 | —                 | —                     | 0.005 | 1.548          | —    |
| CaSr <sub>2</sub> | HXX               | —                 | $P4/nmm(129)$     | —              | —     | —                  | —              | 7.29  | 10.38           | 45.1           | —                 | —                 | —                     | 3.612 | 3.733          | —    |
| CaAg <sub>2</sub> | HXX               | —                 | —                 | $Pmnm(59)$     | —     | —                  | —              | 9.52  | 11.96           | 36.0           | 11.99             | 12.00             | 43.6                  | 2.068 | 2.099          | —    |
| CaSn <sub>2</sub> | PTX               | $C2/m(12)$        | $C'mmm(65)$       | —              | 11.94 | 11.94              | 44.0           | —     | —               | —              | —                 | —                 | —                     | 0.053 | 4.749          | 0.0  |
| CaSb <sub>2</sub> | HXX               | —                 | $P\bar{6}m2(187)$ | $C'mmm(65)$    | —     | —                  | —              | 9.52  | 11.96           | 36.0           | —                 | —                 | —                     | 1.402 | 4.121          | —    |
| CaTe <sub>2</sub> | THX               | $C2/m(12)$        | $P\bar{6}m2(187)$ | —              | 11.55 | 9.01               | 49.8           | 9.86  | 9.90            | 59.2           | —                 | —                 | —                     | 0.410 | 2.140          | 0.0  |
| CaI <sub>2</sub>  | PTX               | $P\bar{3}m1(164)$ | —                 | $P3m1(164)$    | 9.13  | 9.14               | 59.4           | —     | —               | —              | 9.07              | 9.08              | 59.8                  | 0.005 | 1.259          | 0.0  |
| CaBa <sub>2</sub> | HXX               | —                 | $C'mmm(65)$       | —              | —     | —                  | —              | 8.41  | 13.79           | 34.9           | —                 | —                 | —                     | 5.809 | 6.597          | —    |
| CaRr <sub>2</sub> | HXX               | —                 | $P1(1)$           | —              | —     | —                  | —              | 10.09 | 8.92            | 30.6           | —                 | —                 | —                     | 7.678 | 7.791          | —    |
| CaAu <sub>2</sub> | HXX               | —                 | $Pmnm(59)$        | —              | —     | —                  | —              | 7.61  | 8.88            | 54.2           | —                 | —                 | —                     | 1.218 | 1.219          | —    |
| CaHg <sub>2</sub> | HPT               | $Amm2(38)$        | $Pmnm(59)$        | $P6/mmm(191)$  | —     | —                  | —              | 10.67 | 10.75           | 41.0           | 10.98             | 10.99             | 59.6                  | 0.088 | 0.094          | 0.0  |
| CaTi <sub>2</sub> | HXX               | —                 | $P2/c(13)$        | —              | 11.48 | 11.50              | 37.9           | 8.22  | 12.19           | 36.0           | —                 | —                 | —                     | 2.239 | 2.264          | —    |
| CaBi <sub>2</sub> | HXX               | —                 | $Pmnm(47)$        | —              | —     | —                  | —              | 12.04 | 9.66            | 36.2           | —                 | —                 | —                     | 1.884 | 1.930          | —    |
| ScC <sub>2</sub>  | PXX               | —                 | —                 | $Pmnm(59)$     | —     | —                  | —              | —     | —               | —              | 6.80              | 8.20              | 52.8                  | 1.884 | 1.930          | —    |
| ScN <sub>2</sub>  | PXX               | —                 | —                 | $C2/m(12)$     | —     | —                  | —              | —     | —               | —              | 7.35              | 7.36              | 49.7                  | 1.883 | 14.128         | —    |
| ScO <sub>2</sub>  | PXX               | —                 | —                 | $C2/m(12)$     | —     | —                  | —              | —     | —               | —              | 5.77              | 7.32              | 55.5                  | 2.577 | 3.186          | —    |
| ScF <sub>2</sub>  | PHX               | —                 | $P\bar{6}m2(187)$ | $P1(2)$        | —     | —                  | —              | 6.28  | 6.29            | 60.0           | 6.30              | 6.83              | 63.1                  | 0.652 | 0.827          | —    |
| ScS <sub>2</sub>  | PXX               | —                 | —                 | $P\bar{1}(2)$  | —     | —                  | —              | —     | —               | —              | 9.53              | 8.94              | 46.3                  | 1.311 | 1.457          | —    |
| ScCl <sub>2</sub> | HTX               | $C2/m(12)$        | $P\bar{6}m2(187)$ | —              | 7.28  | 7.28               | 59.7           | 7.11  | 7.11            | 59.9           | —                 | —                 | —                     | 0.085 | 2.970          | 0.7  |
| ScCa <sub>2</sub> | HTX               | $P4/mmm(123)$     | $P4/mmm(123)$     | —              | 7.35  | 10.44              | 44.6           | 7.32  | 10.32           | 45.2           | —                 | —                 | —                     | 0.003 | 9.863          | 0.0  |

(Continued on next page)



Table 1: List of stable structures

| species           | Initial structure indices | space group       |                   |       | lattice parameters |       |       |                |       |       | relative energy |                |        | spin moment  |       |                |                   |                   |   |                       |   |   |      |   |   |
|-------------------|---------------------------|-------------------|-------------------|-------|--------------------|-------|-------|----------------|-------|-------|-----------------|----------------|--------|--------------|-------|----------------|-------------------|-------------------|---|-----------------------|---|---|------|---|---|
|                   |                           | T                 | H                 | P     | T                  |       |       | H              |       |       | P               |                |        | $\Delta E_1$ |       |                | $\Delta E_2$      |                   |   | [ $\mu_B$ /unit cell] |   |   |      |   |   |
|                   |                           | a [Å]             | b [Å]             | c [Å] | a [Å]              | b [Å] | c [Å] | $\gamma$ [deg] | a [Å] | b [Å] | c [Å]           | $\gamma$ [deg] | a [Å]  | b [Å]        | c [Å] | $\gamma$ [deg] | $\Delta E_1$ [eV] | $\Delta E_2$ [eV] | T | H                     | P | T | H    | P |   |
| ScSc <sub>2</sub> | HXX                       | -                 | $P4/mmm(123)$     | -     | 6.56               | 9.28  | 45.0  | -              | -     | -     | -               | 5.445          | 12.533 | -            | -     | 5.445          | 12.533            | -                 | - | -                     | - | - | 0.0  | - | - |
| ScCr <sub>2</sub> | HXX                       | -                 | $Cmmm(65)$        | -     | 6.02               | 9.89  | 34.7  | -              | -     | -     | -               | 5.287          | 8.769  | -            | -     | 5.287          | 8.769             | -                 | - | -                     | - | - | 32.2 | - | - |
| ScGe <sub>2</sub> | HXX                       | -                 | $Cmmm(65)$        | -     | 7.97               | 10.15 | 38.2  | -              | -     | -     | -               | 2.631          | 2.774  | -            | -     | 2.631          | 2.774             | -                 | - | -                     | - | - | 0.0  | - | - |
| ScSe <sub>2</sub> | TXX                       | $P\bar{1}(2)$     | -                 | -     | 7.56               | 8.62  | 56.9  | -              | -     | -     | -               | 0.967          | 2.324  | -            | -     | 0.967          | 2.324             | -                 | - | -                     | - | - | 0.0  | - | - |
| ScBr <sub>2</sub> | HXX                       | $P\bar{3}m1(164)$ | -                 | -     | 7.61               | 7.61  | 59.4  | -              | -     | -     | -               | 0.156          | 2.274  | -            | -     | 0.156          | 2.274             | -                 | - | -                     | - | - | 3.8  | - | - |
| ScTe <sub>2</sub> | HXX                       | -                 | $P\bar{6}m2(187)$ | -     | 7.43               | 7.42  | 59.9  | -              | -     | -     | -               | 2.727          | 8.818  | -            | -     | 2.727          | 8.818             | -                 | - | -                     | - | - | 0.0  | - | - |
| ScAl <sub>2</sub> | HXX                       | -                 | $P2/c(13)$        | -     | 7.27               | 10.03 | 35.5  | -              | -     | -     | -               | 0.005          | 6.321  | -            | -     | 0.005          | 6.321             | -                 | - | -                     | - | - | 0.0  | - | - |
| ScAg <sub>2</sub> | HXX                       | -                 | $P4/mmm(123)$     | -     | 6.11               | 8.71  | 44.6  | -              | -     | -     | -               | 5.359          | 5.523  | -            | -     | 5.359          | 5.523             | -                 | - | -                     | - | - | 0.0  | - | - |
| ScIn <sub>2</sub> | HXX                       | -                 | $P4/mmm(123)$     | -     | 10.92              | 8.91  | 35.2  | -              | -     | -     | -               | 0.109          | 4.083  | -            | -     | 0.109          | 4.083             | -                 | - | -                     | - | - | 0.0  | - | - |
| ScSn <sub>2</sub> | PXX                       | -                 | $Pnmm(47)$        | -     | 7.92               | 7.54  | 58.5  | -              | -     | -     | -               | 0.464          | 2.029  | -            | -     | 0.464          | 2.029             | -                 | - | -                     | - | - | 0.0  | - | - |
| ScTe <sub>2</sub> | PXX                       | -                 | $P\bar{1}(2)$     | -     | 8.16               | 8.16  | 59.9  | -              | -     | -     | -               | 0.125          | 0.956  | -            | -     | 0.125          | 0.956             | -                 | - | -                     | - | - | 3.7  | - | - |
| ScCl <sub>2</sub> | THX                       | -                 | $P\bar{6}m2(187)$ | -     | 8.24               | 10.28 | 29.8  | -              | -     | -     | -               | 0.742          | 6.458  | -            | -     | 0.742          | 6.458             | -                 | - | -                     | - | - | 0.0  | - | - |
| ScPt <sub>2</sub> | HXX                       | -                 | $P4/mmm(123)$     | -     | 8.12               | 6.79  | 51.1  | -              | -     | -     | -               | 0.019          | 4.427  | -            | -     | 0.019          | 4.427             | -                 | - | -                     | - | - | 0.0  | - | - |
| ScAu <sub>2</sub> | HXX                       | -                 | $P4/mmm(123)$     | -     | 6.60               | 9.37  | 44.8  | -              | -     | -     | -               | 0.457          | 3.630  | -            | -     | 0.457          | 3.630             | -                 | - | -                     | - | - | 0.0  | - | - |
| ScHg <sub>2</sub> | THX                       | -                 | $P\bar{6}m2(187)$ | -     | 10.98              | 8.71  | 37.3  | -              | -     | -     | -               | 0.502          | 0.573  | -            | -     | 0.502          | 0.573             | -                 | - | -                     | - | - | 0.0  | - | - |
| ScPb <sub>2</sub> | PHT                       | -                 | $Pnma(51)$        | -     | 11.21              | 8.36  | 40.9  | -              | -     | -     | -               | 0.028          | 0.076  | -            | -     | 0.028          | 0.076             | -                 | - | -                     | - | - | 0.0  | - | - |
| ScB <sub>2</sub>  | THP                       | -                 | $Pnmm(47)$        | -     | 5.26               | 7.31  | 43.8  | -              | -     | -     | -               | 0.027          | 0.467  | -            | -     | 0.027          | 0.467             | -                 | - | -                     | - | - | 0.0  | - | - |
| ScBi <sub>2</sub> | THP                       | -                 | $P4/mmm(123)$     | -     | 7.30               | 5.26  | 43.9  | -              | -     | -     | -               | 1.852          | 1.853  | -            | -     | 1.852          | 1.853             | -                 | - | -                     | - | - | 0.0  | - | - |
| TiB <sub>2</sub>  | PXX                       | -                 | -                 | -     | -                  | -     | -     | -              | -     | -     | -               | 3.522          | 5.376  | -            | -     | 3.522          | 5.376             | -                 | - | -                     | - | - | 0.0  | - | - |
| TiC <sub>2</sub>  | PXX                       | -                 | -                 | -     | -                  | -     | -     | -              | -     | -     | -               | 1.634          | 7.641  | -            | -     | 1.634          | 7.641             | -                 | - | -                     | - | - | 0.0  | - | - |
| TiN <sub>2</sub>  | HXX                       | -                 | $P\bar{6}m2(187)$ | -     | 6.50               | 6.52  | 60.3  | -              | -     | -     | -               | 0.530          | 11.273 | -            | -     | 0.530          | 11.273            | -                 | - | -                     | - | - | 8.6  | - | - |
| TiF <sub>2</sub>  | HXX                       | -                 | $P\bar{6}m2(187)$ | -     | 5.70               | 5.69  | 60.0  | -              | -     | -     | -               | 2.451          | 2.491  | -            | -     | 2.451          | 2.491             | -                 | - | -                     | - | - | 0.0  | - | - |
| TiMg <sub>2</sub> | THX                       | -                 | $P4/mmm(123)$     | -     | 6.14               | 8.75  | 44.4  | -              | -     | -     | -               | 0.025          | 10.966 | -            | -     | 0.025          | 10.966            | -                 | - | -                     | - | - | 0.0  | - | - |
| TiAl <sub>2</sub> | HXX                       | -                 | $Pnma(51)$        | -     | 9.02               | 6.93  | 39.8  | -              | -     | -     | -               | 0.695          | 8.486  | -            | -     | 0.695          | 8.486             | -                 | - | -                     | - | - | 0.0  | - | - |
| TiSi <sub>2</sub> | TXX                       | -                 | $P3m1(164)$       | -     | 6.80               | 6.79  | 60.0  | -              | -     | -     | -               | 1.138          | 1.607  | -            | -     | 1.138          | 1.607             | -                 | - | -                     | - | - | 0.0  | - | - |
| TiCl <sub>2</sub> | HXX                       | -                 | -                 | -     | 6.55               | 6.55  | 59.9  | -              | -     | -     | -               | 0.179          | 1.369  | -            | -     | 0.179          | 1.369             | -                 | - | -                     | - | - | 0.0  | - | - |
| TiCa <sub>2</sub> | HXX                       | -                 | $P4/mmm(123)$     | -     | 10.20              | 7.09  | 45.9  | -              | -     | -     | -               | 0.003          | 1.876  | -            | -     | 0.003          | 1.876             | -                 | - | -                     | - | - | 8.6  | - | - |
| TiGe <sub>2</sub> | THX                       | -                 | $Pnmm(47)$        | -     | 9.73               | 8.02  | 34.4  | -              | -     | -     | -               | 0.001          | 1.296  | -            | -     | 0.001          | 1.296             | -                 | - | -                     | - | - | 0.0  | - | - |
| TiSe <sub>2</sub> | PXX                       | -                 | $P\bar{3}m1(164)$ | -     | 7.01               | 6.99  | 59.8  | -              | -     | -     | -               | 0.670          | 0.720  | -            | -     | 0.670          | 0.720             | -                 | - | -                     | - | - | 0.0  | - | - |
| TiBr <sub>2</sub> | HXX                       | -                 | $P\bar{6}m2(187)$ | -     | 7.36               | 7.64  | 58.7  | -              | -     | -     | -               | 0.013          | 9.388  | -            | -     | 0.013          | 9.388             | -                 | - | -                     | - | - | 0.0  | - | - |
| TiIn <sub>2</sub> | HXX                       | -                 | $P4/mmm(123)$     | -     | 6.24               | 8.81  | 45.0  | -              | -     | -     | -               | 0.046          | 1.148  | -            | -     | 0.046          | 1.148             | -                 | - | -                     | - | - | 0.0  | - | - |
| TiSn <sub>2</sub> | THX                       | -                 | $Pnmm(47)$        | -     | 8.37               | 10.36 | 35.7  | -              | -     | -     | -               | 0.179          | 6.492  | -            | -     | 0.179          | 6.492             | -                 | - | -                     | - | - | 0.0  | - | - |
| TiTe <sub>2</sub> | PXX                       | -                 | $P\bar{3}m1(164)$ | -     | 7.51               | 7.50  | 59.8  | -              | -     | -     | -               | 0.061          | 6.409  | -            | -     | 0.061          | 6.409             | -                 | - | -                     | - | - | 0.0  | - | - |
| TiHf <sub>2</sub> | HXX                       | -                 | $P4/mmm(123)$     | -     | 6.71               | 9.49  | 44.8  | -              | -     | -     | -               | 0.501          | 2.761  | -            | -     | 0.501          | 2.761             | -                 | - | -                     | - | - | 0.0  | - | - |
| TiTl <sub>2</sub> | HXX                       | -                 | $Cnmm(65)$        | -     | 7.59               | 8.85  | 39.9  | -              | -     | -     | -               | 0.003          | 9.537  | -            | -     | 0.003          | 9.537             | -                 | - | -                     | - | - | 0.0  | - | - |
| TiBi <sub>2</sub> | PXX                       | -                 | $P\bar{1}(2)$     | -     | 4.80               | 6.81  | 44.4  | -              | -     | -     | -               | 0.806          | 2.263  | -            | -     | 0.806          | 2.263             | -                 | - | -                     | - | - | 0.0  | - | - |
| VB <sub>2</sub>   | THX                       | -                 | $P4/mmm(123)$     | -     | 6.29               | 7.98  | 37.9  | -              | -     | -     | -               | 0.561          | 3.376  | -            | -     | 0.561          | 3.376             | -                 | - | -                     | - | - | 0.0  | - | - |
| VP <sub>2</sub>   | HXX                       | -                 | $Cm(8)$           | -     | 6.08               | 6.10  | 59.8  | -              | -     | -     | -               | 0.014          | 2.829  | -            | -     | 0.014          | 2.829             | -                 | - | -                     | - | - | 4.0  | - | - |
| VO <sub>2</sub>   | TPX                       | -                 | -                 | -     | 5.77               | 5.77  | 60.6  | -              | -     | -     | -               | 0.002          | 8.146  | -            | -     | 0.002          | 8.146             | -                 | - | -                     | - | - | 0.0  | - | - |
| VF <sub>2</sub>   | TPX                       | -                 | $P2/c(13)$        | -     | 6.43               | 6.45  | 60.0  | -              | -     | -     | -               | 0.214          | 1.818  | -            | -     | 0.214          | 1.818             | -                 | - | -                     | - | - | 1.3  | - | - |
| VAI <sub>2</sub>  | HXX                       | -                 | $Pnmm(47)$        | -     | 6.68               | 8.71  | 39.9  | -              | -     | -     | -               | 0.327          | 0.329  | -            | -     | 0.327          | 0.329             | -                 | - | -                     | - | - | 3.7  | - | - |
| VS <sub>2</sub>   | HXX                       | -                 | $P4/mmm(123)$     | -     | 6.35               | 6.34  | 59.9  | -              | -     | -     | -               | 0.001          | 1.961  | -            | -     | 0.001          | 1.961             | -                 | - | -                     | - | - | 12.0 | - | - |
| VAs <sub>2</sub>  | HXX                       | -                 | $P\bar{6}m2(187)$ | -     | 7.21               | 7.21  | 59.8  | -              | -     | -     | -               | 0.966          | 1.508  | -            | -     | 0.966          | 1.508             | -                 | - | -                     | - | - | 0.0  | - | - |
| VSe <sub>2</sub>  | HXX                       | -                 | $P4/mmm(123)$     | -     | 5.89               | 8.37  | 44.3  | -              | -     | -     | -               | 0.228          | 4.235  | -            | -     | 0.228          | 4.235             | -                 | - | -                     | - | - | 0.0  | - | - |
| VBr <sub>2</sub>  | HXX                       | -                 | $Cnmm(65)$        | -     | 8.01               | 5.10  | 35.3  | -              | -     | -     | -               | 6.097          | 19.320 | -            | -     | 6.097          | 19.320            | -                 | - | -                     | - | - | 0.0  | - | - |
| VY <sub>2</sub>   | HXX                       | -                 | $P4/mmm(123)$     | -     | 5.79               | 8.22  | 44.6  | -              | -     | -     | -               | 0.023          | 16.527 | -            | -     | 0.023          | 16.527            | -                 | - | -                     | - | - | 21.1 | - | - |
| VZr <sub>2</sub>  | PTH                       | -                 | $Pnmm(47)$        | -     | 9.32               | 7.61  | 35.5  | -              | -     | -     | -               | 0.548          | 0.549  | -            | -     | 0.548          | 0.549             | -                 | - | -                     | - | - | 0.0  | - | - |
| VAg <sub>2</sub>  | HXX                       | -                 | $P\bar{6}m2(187)$ | -     | 8.60               | 8.63  | 42.2  | -              | -     | -     | -               | 0.205          | 1.563  | -            | -     | 0.205          | 1.563             | -                 | - | -                     | - | - | 4.0  | - | - |
| VFe <sub>2</sub>  | HXX                       | -                 | $P\bar{6}m2(187)$ | -     | 6.61               | 6.61  | 59.9  | -              | -     | -     | -               | 0.007          | 1.825  | -            | -     | 0.007          | 1.825             | -                 | - | -                     | - | - | 2.3  | - | - |
| VVb <sub>2</sub>  | HXX                       | -                 | $P\bar{3}m1(164)$ | -     | 7.58               | 7.58  | 60.0  | -              | -     | -     | -               | 0.007          | 1.825  | -            | -     | 0.007          | 1.825             | -                 | - | -                     | - | - | 12.0 | - | - |
| VBr <sub>2</sub>  | TPX                       | -                 | $P\bar{6}m2(187)$ | -     | 7.76               | 10.28 | 48.5  | -              | -     | -     | -               | 2.329          | 2.557  | -            | -     | 2.329          | 2.557             | -                 | - | -                     | - | - | 1.4  | - | - |
| VSr <sub>2</sub>  | HXX                       | -                 | $Pnmm(47)$        | -     | 9.96               | 7.04  | 44.8  | -              | -     | -     | -               | 0.366          | 0.558  | -            | -     | 0.366          | 0.558             | -                 | - | -                     | - | - | 6.2  | - | - |
| VY <sub>2</sub>   | PTH                       | -                 | $P4/mmm(123)$     | -     | 6.31               | 8.91  | 45.0  | -              | -     | -     | -               | 0.001          | 0.004  | -            | -     | 0.001          | 0.004             | -                 | - | -                     | - | - | 0.0  | - | - |
| VZr <sub>2</sub>  | HXX                       | -                 | $Cnmm(65)$        | -     | 6.93               | 9.05  | 39.6  | -              | -     | -     | -               | 0.725          | 8.211  | -            | -     | 0.725          | 8.211             | -                 | - | -                     | - | - | 0.0  | - | - |
| VCd <sub>2</sub>  | HXX                       | -                 | $P\bar{1}(2)$     | -     | 8.31               | 6.11  | 45.9  | -              | -     | -     | -               | 7.157          | 10.323 | -            | -     | 7.157          |                   |                   |   |                       |   |   |      |   |   |

Table 1: List of stable structures

| species | Initial structure |               | space group   |               |               | lattice parameters |       |       |       |       |       | relative energy   |                   |                            | spin moment |        |      |      |      |
|---------|-------------------|---------------|---------------|---------------|---------------|--------------------|-------|-------|-------|-------|-------|-------------------|-------------------|----------------------------|-------------|--------|------|------|------|
|         | indices           | T             | H             |               |               | T                  |       |       | P     |       |       | $\Delta E_1$ [eV] | $\Delta E_2$ [eV] | $[\mu_B/\text{unit cell}]$ |             |        |      |      |      |
|         |                   |               | T             | H             | P             | a [Å]              | b [Å] | c [Å] | a [Å] | b [Å] | c [Å] |                   |                   | T                          | H           | P      |      |      |      |
| V5b2    | P1H               | $C2/m(12)$    | $Amm2(38)$    | $C2/m(12)$    | $C2/m(12)$    | 9.16               | 9.17  | 43.4  | 8.88  | 8.90  | 43.6  | 9.19              | 9.18              | 43.1                       | 0.058       | 0.300  | 8.3  | 10.3 | 8.4  |
| V1e2    | P1H               | $P2_1/m(11)$  | $P6m2(187)$   | $P2_1/m(11)$  | $P2_1/m(11)$  | 7.42               | 7.45  | 57.1  | 7.26  | 7.25  | 59.9  | 7.49              | 7.50              | 56.0                       | 0.062       | 0.215  | 5.3  | 4.0  | 5.5  |
| Vl2     | TXX               | $P3m1(164)$   | —             | —             | —             | 8.17               | 8.18  | 59.9  | —     | —     | —     | —                 | —                 | —                          | 1.407       | 3.176  | 12.0 | —    | —    |
| VPb2    | P1H               | $P4/mmm(123)$ | $P4/mmm(123)$ | $P4/mmm(123)$ | $P4/mmm(123)$ | —                  | —     | —     | 6.92  | 9.80  | 44.9  | 8.97              | 6.97              | 48.7                       | 0.758       | 4.917  | —    | 12.5 | 0.5  |
| VB12    | P1H               | $C2/m(12)$    | $Amm2(38)$    | $C2/m(12)$    | $C2/m(12)$    | 9.46               | 9.46  | 42.2  | 9.12  | 9.13  | 44.1  | 6.61              | 7.26              | 47.4                       | 0.004       | 0.007  | 9.9  | 10.4 | 10.0 |
| CrC2    | PXX               | —             | —             | $P1(2)$       | —             | —                  | —     | —     | —     | —     | —     | 5.73              | 5.73              | 60.0                       | 0.416       | 0.437  | 8.0  | 0.0  | 8.0  |
| CrO2    | HPT               | $P3m1(164)$   | $P6m2(187)$   | $P3m1(164)$   | —             | 5.74               | 5.73  | 60.0  | 5.23  | 5.23  | 60.0  | 6.88              | 6.79              | 42.4                       | 0.060       | 5.738  | 14.8 | 14.8 | —    |
| CrMg2   | THX               | $P4/mmm(123)$ | $P4/mmm(123)$ | $P4/mmm(123)$ | $P4/mmm(123)$ | 6.26               | 9.01  | 43.8  | 6.25  | 8.95  | 44.1  | 6.61              | 7.26              | 47.4                       | 0.061       | 5.287  | 0.0  | 0.0  | —    |
| CrAl2   | THX               | $P4/mmm(123)$ | $P4/mmm(123)$ | $P4/mmm(123)$ | $P4/mmm(123)$ | 6.35               | 8.44  | 41.2  | 5.94  | 8.41  | 45.0  | —                 | —                 | —                          | 0.835       | 1.359  | —    | —    | 1.8  |
| CrP2    | PXX               | —             | —             | $P1(1)$       | —             | —                  | —     | —     | —     | —     | —     | 6.88              | 6.79              | 42.4                       | 0.835       | 1.359  | —    | —    | —    |
| CrS2    | HXX               | —             | $P6m2(187)$   | —             | —             | —                  | —     | —     | 6.08  | 6.08  | 59.9  | —                 | —                 | —                          | 1.347       | 1.351  | —    | 0.0  | —    |
| CrK2    | HXX               | —             | $P2_1/m(11)$  | —             | —             | —                  | —     | —     | 8.68  | 10.18 | 53.9  | —                 | —                 | —                          | 1.711       | 3.942  | —    | 20.3 | —    |
| CrCa2   | THX               | $P2_1/m(11)$  | $P4/mmm(123)$ | $P2_1/m(11)$  | —             | 7.62               | 8.88  | 54.4  | 7.42  | 10.52 | 44.9  | —                 | —                 | —                          | 0.640       | 8.018  | 16.0 | 17.7 | —    |
| CrSe2   | PHT               | $P4/mmm(123)$ | $P4/mmm(123)$ | $P1(2)$       | —             | 6.42               | 9.09  | 45.0  | 6.42  | 9.09  | 44.9  | 7.40              | 6.70              | 52.5                       | 0.209       | 0.213  | 7.0  | 7.0  | 0.0  |
| CrMn2   | HXX               | $P4/mmm(123)$ | $P4/mmm(123)$ | $P4/mmm(123)$ | $P4/mmm(123)$ | —                  | —     | —     | 8.00  | 5.65  | 44.9  | —                 | —                 | —                          | 11.904      | 16.133 | —    | 23.7 | —    |
| CrGa2   | THX               | $P4/mmm(123)$ | $P4/mmm(123)$ | —             | —             | 5.95               | 8.45  | 44.8  | 5.97  | 8.46  | 44.7  | —                 | —                 | —                          | 0.039       | 5.490  | 10.4 | 10.3 | —    |
| CrGe2   | PXX               | —             | —             | $Pnmma(51)$   | —             | —                  | —     | —     | —     | —     | —     | 6.68              | 6.68              | 50.7                       | 0.941       | 1.385  | —    | —    | 8.8  |
| CrSb2   | TPH               | $P2_1/m(11)$  | $P6m2(187)$   | $P3m1(164)$   | —             | 6.86               | 6.81  | 59.5  | 6.76  | 6.75  | 59.8  | 6.81              | 6.87              | 59.4                       | 0.016       | 0.811  | 8.6  | 8.0  | 8.6  |
| CrSe2   | THX               | $C2/m(12)$    | $Cnmmm(65)$   | —             | —             | 8.07               | 8.07  | 53.5  | 8.02  | 8.02  | 53.5  | —                 | —                 | —                          | 0.554       | 2.069  | 16.0 | 16.0 | —    |
| CrBr2   | THX               | —             | $P4/mmm(123)$ | —             | —             | —                  | —     | —     | 7.97  | 11.30 | 44.9  | 10.01             | 8.10              | 52.3                       | 0.577       | 1.952  | —    | 19.1 | 17.3 |
| CrSi2   | PXX               | $C2/m(12)$    | $P4/mmm(123)$ | $P1(2)$       | —             | 8.81               | 6.98  | 53.0  | 6.86  | 9.72  | 44.9  | 10.19             | 7.21              | 44.0                       | 0.498       | 0.712  | 7.6  | 6.1  | 7.8  |
| CrY2    | HPT               | $P4/mmm(123)$ | $P4/mmm(123)$ | $P2_1/c(14)$  | —             | 8.68               | 6.38  | 45.3  | 6.29  | 8.64  | 46.4  | 9.15              | 6.28              | 43.3                       | 0.094       | 0.119  | 0.0  | 0.0  | 0.0  |
| CrZr2   | PHT               | $P4/mmm(123)$ | $P4/mmm(123)$ | $P4/mmm(123)$ | $P4/mmm(123)$ | —                  | —     | —     | 6.88  | 7.84  | 41.6  | —                 | —                 | —                          | 1.187       | 5.058  | —    | —    | —    |
| CrRu2   | HXX               | —             | $C2/m(12)$    | —             | —             | —                  | —     | —     | 8.80  | 6.45  | 42.3  | —                 | —                 | —                          | 4.969       | 7.754  | —    | 14.5 | —    |
| CrSn2   | HXX               | —             | $P4/mmm(123)$ | —             | —             | —                  | —     | —     | —     | —     | —     | 6.31              | 9.98              | 49.5                       | 0.975       | 1.011  | —    | —    | 13.6 |
| CrSb2   | HXX               | $C2/m(12)$    | $C2/m(12)$    | —             | —             | 8.68               | 8.68  | 53.8  | 8.57  | 8.57  | 54.6  | —                 | —                 | —                          | 0.001       | 3.470  | 16.0 | 16.0 | —    |
| CrH2    | THX               | $P3m1(164)$   | $Amm2(38)$    | —             | —             | 11.35              | 11.40 | 58.3  | 11.95 | 11.92 | 48.4  | 8.70              | 9.16              | 58.2                       | 0.599       | 2.505  | 22.1 | 21.2 | —    |
| CrCs2   | PXX               | —             | —             | $P2_1/m(11)$  | —             | —                  | —     | —     | —     | —     | —     | —                 | —                 | —                          | 1.423       | 2.977  | —    | —    | 0.0  |
| CrBa2   | HXX               | —             | $P4/mmm(123)$ | —             | —             | —                  | —     | —     | 6.24  | 8.82  | 45.0  | —                 | —                 | —                          | 2.721       | 5.543  | —    | 0.0  | —    |
| CrHf2   | PXX               | —             | $Amm2(38)$    | $Pnmmm(59)$   | —             | 9.44               | 9.44  | 42.1  | 9.27  | 9.30  | 42.3  | 6.65              | 8.87              | 67.5                       | 0.910       | 1.161  | —    | —    | 18.2 |
| CrPb2   | HPT               | $C2/m(12)$    | $Cnmmm(65)$   | $C2/m(12)$    | —             | 5.15               | 7.25  | 45.2  | 4.60  | 7.51  | 35.3  | 9.44              | 9.46              | 42.0                       | 0.055       | 0.058  | 14.2 | 14.6 | 14.2 |
| MnBe2   | HXX               | $P4/mmm(123)$ | —             | —             | —             | —                  | —     | —     | —     | —     | —     | 7.88              | 7.88              | 44.5                       | 0.801       | 7.736  | 7.7  | 0.0  | —    |
| MnO2    | PXX               | $P3m1(164)$   | —             | $Cnmmm(65)$   | —             | 5.75               | 5.75  | 60.0  | —     | —     | —     | 6.73              | 6.73              | 59.8                       | 0.801       | 7.736  | —    | —    | 11.0 |
| MnB2    | TPX               | $P3m1(164)$   | —             | $P3m1(164)$   | —             | 6.73               | 6.73  | 59.8  | —     | —     | —     | —                 | —                 | —                          | 1.841       | 4.105  | —    | —    | 12.0 |
| MnF2    | HXX               | —             | $Pnmma(51)$   | —             | —             | —                  | —     | —     | 6.66  | 8.60  | 39.0  | —                 | —                 | —                          | 0.941       | 5.969  | —    | 10.9 | —    |
| MnAl2   | HXX               | —             | $Pnmma(51)$   | —             | —             | —                  | —     | —     | —     | —     | —     | —                 | —                 | —                          | 0.017       | 2.663  | 11.0 | 11.1 | —    |
| MnSi2   | HXX               | $Pnmmm(47)$   | $Pnmmm(47)$   | —             | —             | 7.44               | 9.01  | 34.0  | 9.01  | 7.45  | 34.0  | —                 | —                 | —                          | 0.219       | 0.766  | 10.0 | 12.0 | 0.0  |
| MnFe2   | PHT               | $C2/m(12)$    | $P6m2(187)$   | $C2/m(12)$    | —             | 8.01               | 8.01  | 42.7  | 7.33  | 7.36  | 58.7  | 6.80              | 6.61              | 59.0                       | 0.003       | 1.757  | 11.8 | —    | 11.8 |
| MnS2    | PXX               | $P3m1(164)$   | —             | $P3m1(164)$   | —             | 6.70               | 6.71  | 60.1  | —     | —     | —     | 6.70              | 6.71              | 60.1                       | 0.942       | 1.647  | 20.0 | —    | —    |
| MnCl2   | TXX               | $P3m1(164)$   | —             | —             | —             | 7.45               | 7.46  | 59.8  | —     | —     | —     | —                 | —                 | —                          | 0.942       | 1.647  | 20.0 | —    | —    |
| MnCa2   | TPH               | $P2_1/m(11)$  | $P4/mmm(123)$ | $P1(2)$       | —             | 7.55               | 8.78  | 54.5  | 7.37  | 10.46 | 44.7  | 7.99              | 9.55              | 50.0                       | 0.441       | 0.589  | 14.7 | 17.2 | 14.8 |
| MnSe2   | PHT               | $P1(2)$       | $Pccm(49)$    | $P2_1/m(11)$  | —             | 6.56               | 8.25  | 53.2  | 5.00  | 7.11  | 45.0  | 6.81              | 8.28              | 52.2                       | 0.107       | 0.154  | 5.8  | 0.0  | 5.1  |
| MnCr2   | HXX               | —             | —             | —             | —             | —                  | —     | —     | 5.56  | 7.87  | 45.0  | —                 | —                 | —                          | 16.040      | 17.407 | —    | 8.2  | —    |
| MnMn2   | HXX               | —             | $P4/mmm(123)$ | —             | —             | —                  | —     | —     | —     | —     | —     | —                 | —                 | —                          | 9.663       | 13.770 | —    | 27.3 | —    |
| MnS2    | TXX               | $P3m1(164)$   | —             | —             | —             | 7.02               | 7.03  | 60.0  | —     | —     | —     | —                 | —                 | —                          | 1.765       | 2.984  | 11.5 | —    | —    |
| MnBr2   | TXX               | $P3m1(164)$   | —             | —             | —             | 7.79               | 7.80  | 59.8  | —     | —     | —     | —                 | —                 | —                          | 0.941       | 1.621  | 20.0 | —    | —    |
| MnZr2   | THP               | $P4/mmm(123)$ | $P4/mmm(123)$ | —             | —             | 6.23               | 8.86  | 44.6  | 6.24  | 8.80  | 45.1  | 6.83              | 6.35              | 58.3                       | 0.015       | 0.188  | 0.0  | 0.0  | 0.0  |
| MnIn2   | HXX               | $P4/mmm(123)$ | $P4/mmm(123)$ | $P1(2)$       | —             | 6.36               | 9.06  | 45.4  | 9.07  | 6.39  | 45.3  | —                 | —                 | —                          | 0.000       | 4.674  | 15.2 | —    | —    |
| MnSn2   | HXX               | —             | $Pnmmm(47)$   | —             | —             | —                  | —     | —     | 9.98  | 7.95  | 36.9  | —                 | —                 | —                          | 3.872       | 7.001  | —    | 15.3 | —    |
| MnOs2   | HXX               | —             | $Pnmma(51)$   | —             | —             | —                  | —     | —     | 7.02  | 8.72  | 36.5  | —                 | —                 | —                          | 5.890       | 6.289  | —    | 5.9  | —    |
| MnAu2   | HXX               | $P3m1(164)$   | $P4/mmm(123)$ | —             | —             | 5.96               | 5.96  | 59.3  | 6.68  | 6.68  | 52.5  | —                 | —                 | —                          | 0.711       | 3.227  | 17.2 | 18.0 | —    |
| MnPb2   | PXX               | —             | $P4/mmm(123)$ | $P4/mmm(123)$ | —             | 7.17               | 10.13 | 43.5  | 7.17  | 10.13 | 43.5  | 7.18              | 7.84              | 62.6                       | 0.124       | 3.399  | —    | 15.7 | 15.9 |
| FeBe2   | HXX               | $P4/mmm(123)$ | —             | —             | —             | 7.37               | 5.21  | 45.0  | 7.29  | 5.15  | 45.0  | —                 | —                 | —                          | 0.475       | 9.512  | 0.0  | 5.0  | —    |
| FeB2    | TXX               | $C2/m(12)$    | —             | —             | —             | 5.59               | 5.97  | 36.8  | —     | —     | —     | —                 | —                 | —                          | 4.107       | 4.694  | 0.0  | —    | 8.0  |
| FeO2    | PXX               | $P3m1(164)$   | —             | $P3m1(164)$   | —             | 5.58               | 5.58  | 60.0  | —     | —     | —     | 5.59              | 5.58              | 60.0                       | 0.005       | 3.965  | 8.0  | —    | —    |
| FeF2    | TPH               | $P3m1(164)$   | $P6m2(187)$   | $P3m1(164)$   | —             | 6.35               | 6.39  | 59.6  | 5.85  | 5.86  | 59.7  | 6.33              | 6.34              | 59.6                       | 0.001       | 0.566  | 16.0 | 16.0 | 16.0 |
| FeAl2   | HXX               | $P4/mmm(123)$ | $P4/mmm(123)$ | $P4/mmm(123)$ | —             | 5.68               | 8.05  | 45.0  | 5.68  | 8.05  | 45.0  | —                 | —                 | —                          | 0.092       | 7.347  | 0.0  | 1.8  | —    |

(Continued on next page)

Table 1: List of stable structures

| species           | Initial structure |                        | space group             |                         |      | lattice parameters |       |       |       |       |       | relative energy   |                   |                            | spin moment |      |      |      |
|-------------------|-------------------|------------------------|-------------------------|-------------------------|------|--------------------|-------|-------|-------|-------|-------|-------------------|-------------------|----------------------------|-------------|------|------|------|
|                   | indices           | T                      | H                       | P                       | T    | H                  |       |       | P     |       |       | $\Delta E_1$ [eV] | $\Delta E_2$ [eV] | $[\mu_B/\text{unit cell}]$ |             |      |      |      |
|                   |                   |                        |                         |                         |      | a [Å]              | b [Å] | c [Å] | a [Å] | b [Å] | c [Å] |                   |                   | T                          | H           | P    |      |      |
| FeP <sub>2</sub>  | P1H               | C2/m(12)               | Amn2(38)                | P1(2)                   | 7.74 | 7.75               | 42.3  | 7.31  | 7.34  | 50.7  | 7.38  | 7.08              | 50.5              | 0.161                      | 0.538       | 6.3  | 8.1  | 1.9  |
| FeS <sub>2</sub>  | THX               | P3m1(164)              | P6m2(187)               | —                       | 6.37 | 6.40               | 60.2  | 6.31  | 6.30  | 60.0  | —     | —                 | —                 | 0.666                      | 1.421       | 7.1  | 5.9  | —    |
| FeSe <sub>2</sub> | THX               | P4/mmm(123)            | P4/mmm(123)             | —                       | 6.20 | 8.77               | 45.1  | 6.20  | 8.79  | 44.9  | —     | —                 | —                 | 0.002                      | 1.286       | 0.0  | 0.0  | —    |
| FeGe <sub>2</sub> | PXX               | —                      | —                       | P1(2)                   | —    | —                  | —     | —     | —     | —     | 6.08  | 7.02              | 47.5              | 1.728                      | 1.741       | —    | —    | 7.6  |
| FeAs <sub>2</sub> | THX               | C2/m(12)               | Amn2(38)                | —                       | 8.04 | 8.10               | 43.2  | 7.62  | 7.64  | 50.7  | —     | —                 | —                 | 0.444                      | 7.230       | 7.7  | 9.2  | —    |
| FeSe <sub>2</sub> | P1H               | C2/m(12)               | P6m2(187)               | Cm(8)                   | 6.60 | 6.60               | 59.7  | 6.60  | 6.58  | 59.7  | 6.63  | 6.71              | 59.3              | 0.037                      | 0.674       | 3.9  | 8.0  | 2.0  |
| FeZr <sub>2</sub> | PXX               | —                      | —                       | P1(2)                   | —    | —                  | —     | —     | —     | —     | 5.31  | 7.92              | 59.9              | 1.057                      | 1.825       | —    | —    | 0.0  |
| FeTe <sub>2</sub> | PXX               | Cmmm(65)               | P6m2(187)               | C2/m(12)                | —    | —                  | —     | —     | —     | —     | —     | —                 | —                 | 3.152                      | 7.289       | —    | —    | 0.0  |
| FePd <sub>2</sub> | HTX               | Pmmm(47)               | Pmmm(47)                | —                       | 5.54 | 8.18               | 41.8  | 5.48  | 5.48  | 59.9  | —     | —                 | —                 | 0.018                      | 1.393       | 15.4 | 15.7 | —    |
| FeSn <sub>2</sub> | THX               | —                      | —                       | —                       | 6.41 | 8.64               | 42.0  | 8.64  | 6.42  | 42.0  | —     | —                 | —                 | 2.146                      | 8.222       | 9.7  | 9.7  | —    |
| FeBi <sub>2</sub> | PXX               | —                      | —                       | P1(1)                   | —    | —                  | —     | —     | —     | —     | 7.01  | 8.44              | 50.6              | 2.146                      | 2.272       | —    | —    | 8.0  |
| CoB <sub>2</sub>  | PXX               | —                      | —                       | Pmmm(59)                | —    | —                  | —     | —     | —     | —     | 6.68  | 6.69              | 53.2              | 1.582                      | 1.617       | —    | —    | 0.0  |
| CoC <sub>2</sub>  | TXX               | C2/m(12)               | —                       | —                       | 5.89 | 5.61               | 44.4  | —     | —     | —     | —     | —                 | —                 | 2.261                      | 3.502       | 0.0  | —    | —    |
| CoO <sub>2</sub>  | TPX               | P3m1(164)              | —                       | P3m1(164)               | 5.65 | 5.64               | 59.7  | —     | —     | —     | 5.65  | 5.64              | 59.7              | 0.010                      | 5.514       | 3.3  | —    | 3.3  |
| CoF <sub>2</sub>  | PTX               | P3m1(164)              | P3m1(164)               | —                       | 6.30 | 6.30               | 59.3  | —     | —     | —     | 6.32  | 6.30              | 59.4              | 0.032                      | 2.104       | 12.0 | —    | 12.0 |
| CoAl <sub>2</sub> | THX               | P4/mmm(123)            | P4/mmm(123)             | —                       | 5.72 | 7.87               | 43.2  | 5.43  | 7.82  | 45.7  | —     | —                 | —                 | 0.020                      | 6.863       | 0.0  | 0.0  | —    |
| CoSi <sub>2</sub> | HXX               | —                      | Pbcm(57)                | —                       | —    | —                  | —     | 8.55  | 7.06  | 34.0  | —     | —                 | —                 | 1.204                      | 1.329       | —    | —    | —    |
| CoS <sub>2</sub>  | TPX               | P1(2)                  | —                       | P2/c(13)                | 6.67 | 6.63               | 53.8  | —     | —     | —     | 7.57  | 7.06              | 43.4              | 0.041                      | 1.218       | 0.0  | 0.0  | 0.0  |
| CoSe <sub>2</sub> | TPX               | P1(2)                  | —                       | P2 <sub>1</sub> /m(11)  | 7.00 | 7.04               | 53.3  | —     | —     | —     | 6.68  | 6.82              | 59.7              | 0.153                      | 1.557       | 0.0  | 0.0  | 0.0  |
| CoBr <sub>2</sub> | TXX               | P3m1(164)              | —                       | —                       | 7.47 | 7.48               | 59.6  | —     | —     | —     | —     | —                 | —                 | 1.436                      | 2.428       | 11.9 | —    | —    |
| CoZr <sub>2</sub> | PXX               | —                      | —                       | P2 <sub>1</sub> /m(11)  | —    | —                  | —     | —     | —     | —     | 7.79  | 6.52              | 52.6              | 2.502                      | 2.631       | —    | —    | 0.0  |
| CoSb <sub>2</sub> | HXX               | —                      | Pmm2(25)                | —                       | —    | —                  | —     | 6.95  | 6.94  | 55.2  | —     | —                 | —                 | 1.237                      | 9.025       | —    | 0.6  | —    |
| CoHF <sub>2</sub> | TPX               | C2/m(12)               | —                       | C2/m(12)                | 6.43 | 7.81               | 51.7  | —     | —     | —     | 7.82  | 6.45              | 51.7              | 0.000                      | 2.055       | 0.0  | 0.0  | 0.0  |
| CoI <sub>2</sub>  | HTX               | C2/m(12)               | Amn2(38)                | —                       | 8.38 | 8.39               | 35.6  | 8.23  | 8.24  | 35.8  | —     | —                 | —                 | 0.363                      | 0.833       | 5.0  | 6.3  | —    |
| NiBe <sub>2</sub> | THX               | P3m1(164)              | P4/mmm(123)             | —                       | 7.41 | 6.38               | 29.8  | 5.12  | 7.26  | 44.9  | —     | —                 | —                 | 0.315                      | 6.864       | 0.0  | 0.0  | —    |
| NiO <sub>2</sub>  | THX               | P3m1(164)              | P3m1(164)               | —                       | 5.67 | 5.67               | 59.7  | 5.69  | 5.67  | 59.8  | —     | —                 | —                 | 0.002                      | 2.454       | 0.0  | 0.0  | —    |
| NiP <sub>2</sub>  | HPT               | P1(2)                  | Pc(7)                   | C2/m(12)                | 7.54 | 7.82               | 40.9  | 7.62  | 7.67  | 40.8  | 7.87  | 7.87              | 47.2              | 0.405                      | 0.553       | 0.0  | 0.0  | 0.0  |
| NiS <sub>2</sub>  | TXX               | P3m1(164)              | —                       | —                       | 6.72 | 6.72               | 59.7  | —     | —     | —     | —     | —                 | —                 | 1.559                      | 1.922       | 0.0  | —    | —    |
| NiSc <sub>2</sub> | HPT               | P3m1(164)              | P6m2(187)               | P3m1(164)               | 7.47 | 7.51               | 59.4  | 6.82  | 6.85  | 59.7  | —     | —                 | —                 | 0.008                      | 0.030       | 0.0  | 0.0  | 0.0  |
| NiAs <sub>2</sub> | HTX               | C2/m(12)               | Amn2(38)                | —                       | 8.09 | 7.79               | 43.3  | 7.94  | 7.94  | 41.8  | —     | —                 | —                 | 0.030                      | 2.912       | 0.0  | 0.0  | —    |
| NiSe <sub>2</sub> | PTX               | P3m1(164)              | —                       | P3m1(164)               | 7.16 | 7.18               | 58.9  | —     | —     | —     | 7.16  | 7.16              | 59.1              | 0.016                      | 1.992       | 0.0  | —    | 0.0  |
| NiBi <sub>2</sub> | TXX               | P3m1(164)              | —                       | —                       | 7.40 | 7.39               | 59.6  | —     | —     | —     | —     | —                 | —                 | 1.535                      | 1.574       | 8.0  | —    | —    |
| NiY <sub>2</sub>  | TPX               | P3m1(164)              | —                       | P3m1(164)               | 8.04 | 8.08               | 59.7  | —     | —     | —     | 8.07  | 8.09              | 59.3              | 0.002                      | 0.841       | 0.0  | —    | 0.0  |
| NiIn <sub>2</sub> | HXX               | —                      | Pmmm(47)                | —                       | —    | —                  | —     | 9.15  | 6.93  | 39.5  | —     | —                 | —                 | 2.741                      | 4.089       | —    | —    | —    |
| NiSn <sub>2</sub> | HPT               | P2 <sub>1</sub> /m(11) | Pmmm(47)                | P1(2)                   | 8.32 | 6.49               | 49.8  | 7.04  | 7.04  | 49.5  | 6.70  | 8.17              | 52.9              | 0.383                      | 0.556       | 0.0  | 0.0  | 0.0  |
| NiI <sub>2</sub>  | TXX               | P3m1(164)              | —                       | —                       | 7.96 | 7.95               | 59.6  | —     | —     | —     | —     | —                 | —                 | 2.497                      | 3.016       | 7.8  | —    | —    |
| NiHF <sub>2</sub> | PTX               | C2/m(12)               | —                       | C2/m(12)                | 6.43 | 8.31               | 54.4  | —     | —     | —     | 8.32  | 6.42              | 54.6              | 0.023                      | 1.233       | 0.0  | —    | 0.0  |
| NiIr <sub>2</sub> | HPT               | C2/m(12)               | Amn2(38)                | Pmmm(59)                | 8.49 | 8.49               | 34.7  | 8.41  | 8.44  | 34.6  | 8.69  | 8.69              | 53.7              | 0.275                      | 0.300       | 0.0  | 0.0  | 2.6  |
| NiHg <sub>2</sub> | HXX               | —                      | P4/mmm(123)             | —                       | —    | —                  | —     | —     | —     | —     | —     | —                 | —                 | 3.814                      | 3.885       | —    | —    | —    |
| NiB <sub>2</sub>  | HXX               | —                      | Amn2(38)                | —                       | —    | —                  | —     | 8.51  | 5.99  | 43.8  | —     | —                 | —                 | 1.937                      | 1.956       | —    | —    | —    |
| GaCa <sub>2</sub> | PTH               | P4/mmm(123)            | P4/mmm(123)             | P2 <sub>1</sub> /m(11)  | 7.31 | 10.40              | 44.8  | 10.38 | 7.30  | 44.6  | 7.60  | 8.94              | 53.3              | 0.226                      | 0.265       | 0.0  | 0.0  | 0.0  |
| GaTi <sub>2</sub> | PXX               | —                      | —                       | C2/m(12)                | —    | —                  | —     | —     | —     | —     | 6.10  | 8.18              | 63.1              | 3.154                      | 3.531       | —    | —    | 0.0  |
| GaCr <sub>2</sub> | TXX               | P4/mmm(123)            | —                       | —                       | 6.04 | 8.64               | 43.3  | —     | —     | —     | —     | —                 | —                 | 0.958                      | 5.749       | 33.7 | —    | —    |
| GaMn <sub>2</sub> | HXX               | —                      | P4/mmm(123)             | —                       | —    | —                  | —     | 5.78  | 8.35  | 41.9  | —     | —                 | —                 | 3.209                      | 4.275       | —    | 31.7 | —    |
| GaY <sub>2</sub>  | PHX               | —                      | P4/mmm(123)             | C2/m(12)                | —    | —                  | —     | 7.03  | 9.96  | 44.9  | 8.50  | 9.40              | 46.9              | 0.142                      | 2.547       | 0.0  | 0.0  | 0.0  |
| GaSn <sub>2</sub> | HXX               | —                      | Amn2(38)                | —                       | —    | —                  | —     | 9.90  | 9.94  | 36.7  | —     | —                 | —                 | 3.145                      | 5.782       | 0.0  | 0.2  | —    |
| GeBe <sub>2</sub> | HPT               | P6mm(183)              | Pmm2 <sub>1</sub> (31)  | Pmmm(59)                | 7.51 | 7.53               | 60.0  | 6.45  | 6.45  | 47.0  | 7.59  | 7.34              | 58.9              | 0.620                      | 0.717       | 0.0  | 0.0  | 0.0  |
| GeC <sub>2</sub>  | PXX               | —                      | P42 <sub>1</sub> m(113) | P42 <sub>1</sub> m(113) | —    | —                  | —     | —     | —     | —     | 6.49  | 6.48              | 90.0              | 2.928                      | 5.387       | —    | —    | 0.0  |
| GeO <sub>2</sub>  | THX               | P3m1(164)              | P3m1(164)               | —                       | 5.81 | 5.81               | 60.0  | 5.81  | 5.81  | 60.0  | —     | —                 | —                 | 0.005                      | 2.317       | 0.0  | 0.0  | —    |
| GeMg <sub>2</sub> | PTX               | P3m1(164)              | Amn2(38)                | Pmmm(59)                | 8.89 | 8.90               | 59.6  | —     | —     | —     | 9.01  | 8.04              | 55.4              | 0.432                      | 1.688       | 0.0  | —    | 0.0  |
| GeAl <sub>2</sub> | HXX               | —                      | —                       | —                       | —    | —                  | —     | 8.11  | 8.10  | 39.7  | 8.29  | 8.29              | 79.8              | 1.794                      | 2.666       | —    | —    | —    |
| GeCl <sub>2</sub> | TPX               | P3m1(164)              | Amn2(38)                | P1(1)                   | 7.86 | 7.86               | 60.6  | —     | —     | —     | 8.29  | 8.29              | 79.8              | 0.279                      | 0.979       | 0.0  | 0.0  | 0.0  |
| GeK <sub>2</sub>  | HXX               | —                      | Amn2(38)                | —                       | —    | —                  | —     | 10.57 | 9.90  | 46.0  | —     | —                 | —                 | 2.766                      | 3.054       | —    | —    | —    |
| GeCa <sub>2</sub> | PTX               | P3m1(164)              | —                       | P3m1(164)               | 9.50 | 9.50               | 59.6  | —     | —     | —     | 9.43  | 9.44              | 60.1              | 0.005                      | 2.573       | 0.0  | 0.0  | —    |
| GeCr <sub>2</sub> | THX               | P2 <sub>1</sub> /m(11) | P4/mmm(123)             | —                       | 7.43 | 7.87               | 58.0  | 5.95  | 8.44  | 44.8  | —     | —                 | —                 | 0.593                      | 2.554       | 31.9 | 32.5 | —    |
| GeGe <sub>2</sub> | HPX               | —                      | P6m2(187)               | P1(1)                   | —    | —                  | —     | 7.72  | 7.73  | 60.0  | 8.18  | 6.15              | 69.2              | 0.126                      | 1.722       | —    | —    | 0.0  |
| GeSe <sub>2</sub> | HTX               | P3m1(164)              | C222(21)                | —                       | 7.28 | 7.28               | 59.7  | 7.47  | 7.47  | 78.8  | —     | —                 | —                 | 0.394                      | 1.030       | 0.0  | 0.0  | —    |

(Continued on next page)

Table 1: List of stable structures

| species           | Initial structure |                   |                    | space group       |       |       | lattice parameters |       |       |                |                   |                   | relative energy |       |       | spin moment |        |      |       |       |
|-------------------|-------------------|-------------------|--------------------|-------------------|-------|-------|--------------------|-------|-------|----------------|-------------------|-------------------|-----------------|-------|-------|-------------|--------|------|-------|-------|
|                   | indices           | T                 | H                  | P                 | T     |       |                    | H     |       |                | $\Delta E_1$ [eV] | $\Delta E_2$ [eV] | T               | H     | P     | T           | H      | P    |       |       |
|                   |                   |                   |                    |                   | a [Å] | b [Å] | $\gamma$ [deg]     | a [Å] | b [Å] | $\gamma$ [deg] |                   |                   |                 |       |       |             |        |      | a [Å] | b [Å] |
| GeBr <sub>2</sub> | P1X               | $P\bar{3}m1(164)$ | —                  | $P\bar{3}m1(164)$ | 8.10  | 8.10  | 60.6               | 10.96 | 10.28 | —              | 46.3              | —                 | 8.16            | 7.06  | 90.0  | 0.045       | 1.381  | 0.0  | —     | 0.0   |
| GeRb <sub>2</sub> | HXX               | —                 | $Am\bar{m}2(38)$   | —                 | 9.92  | 9.92  | 59.6               | 6.11  | 6.11  | —              | —                 | —                 | 9.86            | 9.87  | 59.9  | 0.003       | 2.266  | 0.0  | —     | 0.0   |
| GeSr <sub>2</sub> | P1X               | $P\bar{3}m1(164)$ | —                  | $P\bar{3}m1(164)$ | 7.57  | 7.59  | 45.3               | 8.87  | 8.84  | —              | 38.0              | —                 | 5.78            | 7.27  | 66.1  | 0.230       | 0.630  | 0.0  | —     | 0.0   |
| GePd <sub>2</sub> | PTH               | $P2_1/m(11)$      | $P\bar{6}m2(187)$  | —                 | 9.08  | 9.08  | 59.8               | 8.81  | 8.97  | —              | 40.7              | —                 | —               | —     | —     | 0.761       | 0.863  | 0.0  | —     | —     |
| GeCd <sub>2</sub> | H1X               | $P3m1(164)$       | $Pm(6)$            | —                 | —     | —     | —                  | 8.21  | 8.23  | —              | 60.0              | —                 | —               | —     | —     | 0.867       | 0.879  | 0.0  | —     | —     |
| GeIn <sub>2</sub> | HXX               | —                 | $P\bar{6}m2(187)$  | —                 | —     | —     | —                  | —     | —     | —              | —                 | —                 | —               | —     | —     | 0.915       | 1.077  | 0.0  | —     | —     |
| GeSn <sub>2</sub> | HXX               | —                 | $P\bar{6}m2(187)$  | —                 | —     | —     | —                  | —     | —     | —              | —                 | —                 | —               | —     | —     | 0.284       | 0.953  | 0.0  | —     | —     |
| GeTe <sub>2</sub> | TPX               | $P\bar{3}m1(164)$ | —                  | $P\bar{3}m1(164)$ | 7.84  | 7.84  | 59.0               | 11.13 | 11.12 | —              | 48.6              | —                 | 9.44            | 9.40  | 69.4  | 0.015       | 0.776  | 8.0  | 5.3   | 8.0   |
| GeS <sub>2</sub>  | PTH               | $P\bar{3}m1(164)$ | $Am\bar{m}2(38)$   | —                 | 11.87 | 11.83 | 58.2               | 5.95  | 5.97  | —              | 60.1              | —                 | 11.60           | 11.60 | 59.4  | 0.010       | 1.539  | 0.0  | —     | —     |
| GeBa <sub>2</sub> | P1X               | $P\bar{3}m1(164)$ | $P\bar{6}m2(187)$  | —                 | 10.28 | 10.28 | 59.2               | 7.78  | 7.78  | —              | 42.5              | —                 | 10.16           | 10.16 | 60.2  | 0.091       | 2.490  | 0.0  | —     | —     |
| GePt <sub>2</sub> | HXX               | —                 | $P\bar{6}m2(187)$  | —                 | —     | —     | —                  | —     | —     | —              | —                 | —                 | —               | —     | —     | 0.120       | 1.981  | 0.0  | —     | —     |
| GeAu <sub>2</sub> | THX               | $P2_1/m(11)$      | $Pm\bar{m}2_1(31)$ | —                 | 7.84  | 7.85  | 42.0               | 8.49  | 7.08  | —              | 51.7              | —                 | —               | —     | —     | 1.926       | 1.934  | 0.0  | —     | —     |
| GeTi <sub>2</sub> | HXX               | —                 | $Pm(6)$            | —                 | —     | —     | —                  | —     | —     | —              | —                 | —                 | —               | —     | —     | 0.402       | 3.003  | 0.0  | —     | —     |
| AsS <sub>2</sub>  | TPX               | $P\bar{3}m1(164)$ | —                  | $P1(1)$           | 7.00  | 7.01  | 59.5               | 6.59  | 10.23 | —              | 67.7              | —                 | 6.59            | 10.23 | 67.7  | 0.078       | 2.960  | 0.0  | —     | —     |
| AsS <sub>2</sub>  | TPX               | $P\bar{3}m1(164)$ | —                  | $Cm(8)$           | 8.66  | 8.68  | 59.8               | 8.71  | 8.73  | —              | 59.6              | —                 | 8.71            | 8.73  | 59.6  | 0.154       | 1.572  | 0.0  | —     | —     |
| AsC <sub>2</sub>  | P1X               | $P2_1/m(11)$      | —                  | $P2_1/m(11)$      | 7.89  | 7.47  | 61.3               | —     | —     | —              | —                 | —                 | 7.97            | 7.52  | 61.6  | 0.008       | 2.161  | 0.0  | —     | —     |
| AsS <sub>2</sub>  | HXX               | —                 | $P2/c(13)$         | —                 | —     | —     | —                  | 6.16  | 8.05  | —              | 48.4              | —                 | —               | —     | —     | 5.888       | 8.074  | 0.0  | —     | —     |
| AsV <sub>2</sub>  | TXX               | $P2_1/m(11)$      | —                  | —                 | 6.21  | 6.96  | 62.8               | —     | —     | —              | —                 | —                 | —               | —     | —     | 7.718       | 8.634  | 0.0  | —     | —     |
| AsCr <sub>2</sub> | TXX               | $P\bar{1}(2)$     | —                  | —                 | 7.05  | 7.27  | 60.7               | —     | —     | —              | —                 | —                 | —               | —     | —     | 2.208       | 4.659  | 15.9 | —     | —     |
| AsSe <sub>2</sub> | TXX               | $P\bar{3}m1(164)$ | —                  | —                 | 7.33  | 7.34  | 59.3               | —     | —     | —              | —                 | —                 | —               | —     | —     | 1.864       | 1.925  | 0.0  | —     | —     |
| AsRb <sub>2</sub> | HXX               | —                 | $Cm\bar{m}m(65)$   | —                 | —     | —     | —                  | 9.67  | 12.74 | —              | 36.5              | —                 | —               | —     | —     | 2.480       | 2.557  | 0.0  | —     | —     |
| AsS <sub>2</sub>  | TPX               | $P\bar{3}m1(164)$ | —                  | $P2_1/m(11)$      | 9.11  | 9.12  | 60.0               | —     | —     | —              | —                 | —                 | 9.13            | 9.21  | 59.6  | 0.033       | 1.587  | 0.0  | —     | 1.8   |
| AsZr <sub>2</sub> | TPX               | $P2_1/m(11)$      | —                  | $P2_1/m(11)$      | 8.17  | 8.22  | 51.8               | —     | —     | —              | —                 | —                 | 7.26            | 8.15  | 63.3  | 0.078       | 2.960  | 0.0  | —     | 0.0   |
| AsPd <sub>2</sub> | H1P               | $C2/m(12)$        | —                  | $C2/m(12)$        | 8.55  | 8.54  | 40.6               | 7.31  | 6.09  | —              | 65.1              | —                 | 8.60            | 8.60  | 59.4  | 0.242       | 0.782  | 0.0  | —     | 0.0   |
| AsSb <sub>2</sub> | PTH               | $P\bar{3}m1(164)$ | $Pm\bar{m}2_1(31)$ | —                 | 7.43  | 7.39  | 59.4               | 7.89  | 7.88  | —              | 59.2              | —                 | 7.95            | 9.70  | 54.5  | 0.071       | 0.233  | 0.0  | —     | 0.0   |
| AsTe <sub>2</sub> | TXX               | $P\bar{3}m1(164)$ | $P3m1(156)$        | —                 | 7.81  | 7.78  | 58.8               | —     | —     | —              | —                 | —                 | —               | —     | —     | 1.290       | 1.502  | 0.0  | —     | —     |
| AsC <sub>2</sub>  | TPX               | $P\bar{3}m1(164)$ | —                  | $Cm(8)$           | 11.37 | 11.31 | 59.6               | —     | —     | —              | —                 | —                 | 11.44           | 11.32 | 58.7  | 0.116       | 0.844  | 4.0  | —     | 4.0   |
| AsBa <sub>2</sub> | TPX               | $P\bar{3}m1(164)$ | —                  | $P2_1/m(11)$      | 9.46  | 9.52  | 60.2               | —     | —     | —              | —                 | —                 | 9.67            | 9.56  | 59.2  | 0.018       | 1.636  | 0.0  | —     | —     |
| AsHF <sub>2</sub> | P1X               | $P2_1/m(11)$      | —                  | $P2_1/m(11)$      | 6.99  | 8.10  | 64.3               | —     | —     | —              | —                 | —                 | 8.14            | 8.16  | 50.3  | 0.155       | 2.724  | 0.0  | —     | —     |
| SeLi <sub>2</sub> | TPX               | $P\bar{3}m1(164)$ | —                  | $P2_1/m(11)$      | 8.32  | 8.31  | 59.8               | —     | —     | —              | —                 | —                 | 8.33            | 8.31  | 59.8  | 0.043       | 2.199  | 0.0  | —     | 0.0   |
| SeBe <sub>2</sub> | PXX               | —                 | —                  | $P1(1)$           | —     | —     | —                  | —     | —     | —              | —                 | —                 | 5.42            | 7.01  | 69.5  | 1.058       | 1.540  | —    | —     | 0.0   |
| SeNa <sub>2</sub> | TXX               | $P\bar{3}m1(164)$ | —                  | —                 | 9.39  | 9.40  | 59.6               | —     | —     | —              | —                 | —                 | —               | —     | —     | 2.205       | 2.205  | 0.0  | —     | —     |
| SeS <sub>2</sub>  | P1X               | $P\bar{3}m1(164)$ | —                  | $P1(1)$           | 7.14  | 7.14  | 60.3               | —     | —     | —              | —                 | —                 | 9.50            | 8.02  | 80.9  | 0.729       | 4.000  | 0.0  | —     | 0.0   |
| SeK <sub>2</sub>  | P1X               | $P\bar{3}m1(164)$ | —                  | $P\bar{3}m1(164)$ | 10.65 | 10.65 | 57.2               | —     | —     | —              | —                 | —                 | 10.35           | 10.34 | 59.7  | 0.075       | 1.818  | 0.0  | —     | 0.0   |
| SeCa <sub>2</sub> | THX               | $P\bar{3}m1(164)$ | $P\bar{6}m2(187)$  | —                 | 8.06  | 8.06  | 60.0               | 8.00  | 7.99  | —              | 59.8              | —                 | 8.12            | 8.12  | 52.1  | 0.534       | 1.206  | 0.0  | —     | 0.0   |
| SeSc <sub>2</sub> | TPH               | $P2_1/m(11)$      | $P\bar{6}m2(187)$  | —                 | 8.11  | 8.12  | 52.2               | 6.98  | 6.97  | —              | 60.0              | —                 | 8.12            | 8.12  | 52.1  | 0.003       | 0.776  | 0.0  | —     | 0.0   |
| SeV <sub>2</sub>  | TXX               | $P\bar{1}(2)$     | —                  | —                 | 6.59  | 6.77  | 60.4               | —     | —     | —              | —                 | —                 | —               | —     | —     | 9.914       | 10.090 | 0.0  | —     | —     |
| SeSe <sub>2</sub> | TXX               | $P\bar{3}m1(164)$ | —                  | —                 | 7.47  | 7.47  | 60.3               | —     | —     | —              | —                 | —                 | —               | —     | —     | 0.859       | 2.830  | 0.0  | —     | —     |
| SeBr <sub>2</sub> | HXX               | —                 | $P1(1)$            | —                 | —     | —     | —                  | 8.07  | 7.30  | —              | 76.7              | —                 | —               | —     | —     | 0.853       | 0.872  | —    | —     | 0.0   |
| SeRb <sub>2</sub> | PTH               | $P\bar{3}m1(164)$ | —                  | $P\bar{3}m1(164)$ | 10.88 | 10.87 | 58.8               | —     | —     | —              | —                 | —                 | 10.72           | 10.71 | 59.6  | 0.015       | 1.665  | 0.0  | —     | 0.0   |
| SeS <sub>2</sub>  | THX               | $P\bar{3}m1(164)$ | $P\bar{6}m2(187)$  | —                 | 8.59  | 8.58  | 59.5               | 8.53  | 8.53  | —              | 59.4              | —                 | 7.53            | 8.63  | 64.1  | 0.726       | 2.660  | 0.0  | —     | 0.0   |
| SeY <sub>2</sub>  | H1P               | $P\bar{3}m1(164)$ | $P\bar{6}m2(187)$  | —                 | 7.66  | 7.65  | 60.0               | 7.39  | 7.38  | —              | 59.9              | —                 | 7.17            | 8.16  | 63.9  | 0.058       | 0.150  | 0.0  | —     | 0.0   |
| SeZr <sub>2</sub> | P1X               | $P2_1/m(11)$      | —                  | $P2_1/m(11)$      | 8.16  | 8.15  | 52.1               | —     | —     | —              | —                 | —                 | —               | —     | —     | 0.023       | 3.252  | 0.0  | —     | 0.0   |
| SeIn <sub>2</sub> | H1X               | $P\bar{3}m1(164)$ | $P\bar{6}m2(187)$  | —                 | 8.13  | 8.11  | 60.6               | 7.98  | 7.97  | —              | 60.6              | —                 | —               | —     | —     | 0.285       | 2.427  | 0.0  | —     | 0.0   |
| SeSn <sub>2</sub> | PTH               | $P2_1/m(11)$      | —                  | $P1(1)$           | 7.46  | 7.46  | 59.0               | —     | —     | —              | —                 | —                 | 8.39            | 9.21  | 80.6  | 0.327       | 0.868  | 0.0  | —     | 0.0   |
| SeSb <sub>2</sub> | P1X               | $P\bar{1}(2)$     | —                  | $P1(1)$           | 7.56  | 7.90  | 59.6               | —     | —     | —              | —                 | —                 | 11.69           | 10.10 | 42.7  | 0.546       | 2.176  | 0.0  | —     | 0.0   |
| Se <sub>2</sub>   | H1X               | $P\bar{1}(2)$     | $Cm\bar{m}m(65)$   | —                 | 7.92  | 10.24 | 76.2               | 9.54  | 7.92  | —              | 65.7              | —                 | —               | —     | —     | 0.078       | 0.890  | 0.0  | —     | 0.0   |
| SeCs <sub>2</sub> | TPX               | $P\bar{3}m1(164)$ | —                  | $P\bar{3}m1(164)$ | 11.22 | 11.19 | 58.8               | —     | —     | —              | —                 | —                 | 11.06           | 11.04 | 59.8  | 0.018       | 1.302  | 0.0  | —     | 0.0   |
| SeBa <sub>2</sub> | TXX               | $P\bar{3}m1(164)$ | —                  | —                 | 9.11  | 9.10  | 59.5               | —     | —     | —              | —                 | —                 | —               | —     | —     | 1.546       | 1.697  | 0.0  | —     | —     |
| SeTi <sub>2</sub> | PTH               | $P\bar{3}m1(164)$ | $P\bar{6}m2(187)$  | —                 | 9.00  | 9.00  | 58.8               | 8.70  | 8.70  | —              | 58.1              | —                 | 8.99            | 8.98  | 58.6  | 0.005       | 0.055  | 0.0  | —     | 0.0   |
| SePb <sub>2</sub> | PHT               | $P2_1/m(11)$      | $Pm\bar{m}m(59)$   | —                 | 7.94  | 7.94  | 57.5               | 7.02  | 7.77  | —              | 55.9              | —                 | 10.61           | 10.61 | 43.2  | 0.379       | 0.517  | 0.0  | —     | 0.0   |
| SeBi <sub>2</sub> | PXX               | —                 | —                  | $P1(1)$           | —     | —     | —                  | —     | —     | —              | —                 | —                 | 11.73           | 8.77  | 58.6  | 1.572       | 1.751  | —    | —     | 0.0   |
| BrLi <sub>2</sub> | TPH               | $C2/m(12)$        | $Pc(7)$            | —                 | 7.43  | 7.77  | 57.0               | 6.71  | 6.66  | —              | 72.0              | —                 | 8.01            | 7.42  | 89.9  | 0.103       | 0.215  | 0.0  | —     | 0.0   |
| BrF <sub>2</sub>  | H1P               | $P2_1/m(10)$      | $P\bar{1}(2)$      | —                 | 8.04  | 5.93  | 90.6               | 8.79  | 5.94  | —              | 62.1              | —                 | 7.31            | 8.37  | 74.4  | 0.070       | 0.577  | 0.0  | —     | 0.0   |
| BrAl <sub>2</sub> | PXX               | —                 | $P2(3)$            | —                 | —     | —     | —                  | —     | —     | —              | —                 | —                 | 6.99            | 7.56  | 83.1  | 5.015       | 5.034  | —    | —     | 0.0   |
| BrCl <sub>2</sub> | PHT               | $P\bar{1}(2)$     | —                  | $P1(1)$           | 8.01  | 8.38  | 80.5               | 8.06  | 8.01  | —              | 70.2              | —                 | 11.19           | 11.29 | 102.7 | 0.218       | 0.228  | 0.0  | —     | 0.0   |
| BrK <sub>2</sub>  | THP               | $P\bar{3}m1(164)$ | $P\bar{6}m2(187)$  | —                 | 9.59  | 9.57  | 58.4               | 9.58  | 9.55  | —              | 56.4              | —                 | 11.19           | 11.15 | 90.5  | 0.245       | 0.281  | 0.0  | —     | 0.0   |

(Continued on next page)

Table 1: List of stable structures

| species           | Initial structure |                   | space group       |                   |   | lattice parameters |       |       | relative energy |       |       | spin moment                |                |                   |                   |      |     |      |
|-------------------|-------------------|-------------------|-------------------|-------------------|---|--------------------|-------|-------|-----------------|-------|-------|----------------------------|----------------|-------------------|-------------------|------|-----|------|
|                   | indices           | T                 | H                 |                   |   | T                  |       |       | P               |       |       | $[\mu_B/\text{unit cell}]$ |                |                   |                   |      |     |      |
|                   |                   |                   | T                 | H                 | P | a [Å]              | b [Å] | c [Å] | $\gamma$ [deg]  | a [Å] | b [Å] | c [Å]                      | $\gamma$ [deg] | $\Delta E_1$ [eV] | $\Delta E_2$ [eV] | T    | H   | P    |
| BrCa <sub>2</sub> | THX               | $P\bar{3}m1(164)$ | $P\bar{6}m2(187)$ | —                 | — | —                  | 7.79  | 7.79  | 7.77            | 60.0  | 6.24  | 6.51                       | 79.3           | 0.200             | 2.747             | 0.0  | 0.0 | —    |
| BrSe <sub>2</sub> | PXX               | —                 | —                 | $P1(1)$           | — | —                  | —     | —     | —               | —     | —     | —                          | —              | 6.190             | 7.243             | —    | —   | 0.0  |
| BrTi <sub>2</sub> | TXX               | $Pmma(51)$        | —                 | —                 | — | 7.80               | 5.55  | 45.2  | —               | —     | —     | —                          | —              | 14.720            | 20.222            | 0.0  | —   | —    |
| BrGe <sub>2</sub> | PXX               | —                 | —                 | $P1(1)$           | — | —                  | —     | —     | —               | —     | —     | —                          | —              | 1.999             | 2.060             | —    | —   | 0.0  |
| BrSe <sub>2</sub> | PHX               | —                 | $P1(1)$           | —                 | — | —                  | —     | —     | —               | —     | —     | —                          | —              | 0.617             | 2.111             | —    | —   | 0.0  |
| BrBr <sub>2</sub> | PXX               | —                 | —                 | $P1(2)$           | — | —                  | —     | —     | —               | —     | —     | —                          | —              | 1.125             | 1.130             | —    | —   | 0.0  |
| BrBr <sub>2</sub> | THP               | $P\bar{3}m1(164)$ | $Amm2(38)$        | $P2_1/m(11)$      | — | —                  | 10.19 | 10.17 | 58.1            | 56.1  | 11.31 | 11.73                      | 90.6           | 0.241             | 0.304             | 0.0  | 0.0 | 0.0  |
| BrSr <sub>2</sub> | THX               | $P3m1(164)$       | $P\bar{6}m2(187)$ | —                 | — | 8.38               | 8.38  | 59.6  | —               | —     | 8.30  | 8.30                       | 59.7           | 0.198             | 1.454             | 0.0  | 0.0 | —    |
| BrSn <sub>2</sub> | PXX               | $P2_1/m(11)$      | —                 | $Pm(6)$           | — | 6.19               | 6.18  | 71.5  | —               | —     | —     | —                          | —              | 0.121             | 1.408             | 0.0  | —   | 0.0  |
| BrI <sub>2</sub>  | PXX               | —                 | —                 | $Pm(6)$           | — | —                  | —     | —     | —               | —     | —     | —                          | —              | 1.177             | 3.073             | —    | —   | 0.0  |
| BrCs <sub>2</sub> | THP               | $P\bar{3}m1(164)$ | $P\bar{6}m2(187)$ | $P\bar{4}m2(115)$ | — | 10.65              | 10.61 | 59.4  | 57.1            | 10.59 | 13.24 | 11.46                      | 66.2           | 0.309             | 0.629             | 0.0  | 0.0 | 0.0  |
| BrBa <sub>2</sub> | HFX               | $P3m1(164)$       | $P\bar{6}m2(187)$ | $P\bar{6}m2(115)$ | — | 8.85               | 8.85  | 59.8  | 57.1            | 8.72  | 8.72  | 59.7                       | 57.1           | 0.055             | 3.475             | 0.0  | 0.0 | —    |
| BrHf <sub>2</sub> | THP               | $P2_1/m(11)$      | $Pm(6)$           | $Pm(6)$           | — | 6.60               | 6.70  | 59.5  | 60.3            | 6.58  | 6.58  | 60.3                       | 49.6           | 0.551             | 0.623             | 0.0  | 0.0 | 0.0  |
| BrRe <sub>2</sub> | PXX               | —                 | —                 | $Cm(8)$           | — | —                  | —     | —     | —               | —     | —     | —                          | —              | 5.65              | 6.00              | —    | —   | 0.0  |
| BrTi <sub>2</sub> | PTH               | $P\bar{3}m1(164)$ | $Amm2(38)$        | $P1(1)$           | — | 7.88               | 7.87  | 58.6  | 54.7            | 8.04  | 8.06  | 54.7                       | 58.8           | 0.056             | 0.449             | 0.0  | 0.0 | 0.0  |
| BrPb <sub>2</sub> | PXX               | —                 | —                 | $P1(1)$           | — | 10.37              | 10.37 | 57.5  | —               | —     | —     | —                          | —              | 1.434             | 2.317             | —    | —   | 0.0  |
| RbN <sub>2</sub>  | TPX               | $P2/c(13)$        | —                 | $P6/mmm(191)$     | — | 7.81               | 11.09 | 44.7  | 57.0            | 9.36  | —     | —                          | —              | 0.029             | 0.851             | 20.0 | —   | 20.0 |
| RbF <sub>2</sub>  | THX               | $P4/mmm(123)$     | $P\bar{6}m2(187)$ | $P\bar{6}m2(187)$ | — | 10.76              | 12.97 | 37.0  | —               | —     | —     | —                          | —              | 0.508             | 1.140             | 4.0  | —   | —    |
| RbS <sub>2</sub>  | TPX               | $P1(2)$           | —                 | $C2(5)$           | — | 8.99               | 12.73 | 45.1  | 56.7            | 10.82 | 10.87 | 56.7                       | 68.2           | 0.082             | 1.896             | 0.0  | —   | 0.0  |
| RbCl <sub>2</sub> | THX               | $P4/mmm(123)$     | $P\bar{6}m2(187)$ | $P\bar{6}m2(187)$ | — | 16.29              | 16.29 | 59.5  | —               | —     | —     | —                          | —              | 0.349             | 1.122             | 4.0  | —   | —    |
| RbK <sub>2</sub>  | TPX               | $P3m1(164)$       | —                 | $P6/mmm(191)$     | — | —                  | —     | —     | —               | —     | —     | —                          | —              | 0.042             | 2.192             | 0.0  | —   | 0.0  |
| RbCa <sub>2</sub> | HXX               | —                 | $P2_1/m(11)$      | —                 | — | —                  | —     | —     | —               | 14.39 | 15.13 | 16.3                       | 65.6           | 7.929             | 7.954             | —    | —   | —    |
| RbGe <sub>2</sub> | PXX               | —                 | —                 | $P2/c(13)$        | — | —                  | —     | —     | —               | —     | —     | —                          | —              | 0.831             | 0.907             | —    | —   | 0.0  |
| RbSe <sub>2</sub> | PXX               | —                 | —                 | $P2_1(4)$         | — | —                  | —     | —     | —               | —     | —     | —                          | —              | 0.890             | 6.183             | —    | —   | 0.0  |
| RbBr <sub>2</sub> | THX               | $P4/mmm(123)$     | $P\bar{6}m2(187)$ | —                 | — | 9.35               | 13.21 | 44.9  | 57.6            | 11.21 | 11.16 | 57.6                       | 30.7           | 0.841             | 2.222             | —    | —   | 0.0  |
| RbSr <sub>2</sub> | HTP               | $P6/mmm(191)$     | $Amm2(38)$        | $P6/mmm(191)$     | — | 15.62              | 15.61 | 60.1  | —               | —     | —     | —                          | —              | 0.003             | 4.908             | 0.0  | —   | —    |
| RbY <sub>2</sub>  | HXX               | $Cmm2(35)$        | $Cmm2(35)$        | —                 | — | 10.86              | 10.88 | 34.3  | —               | —     | —     | —                          | —              | 0.005             | 12.283            | 0.0  | —   | —    |
| RbI <sub>2</sub>  | PTX               | $P4/mmm(123)$     | —                 | $P2/m(10)$        | — | —                  | —     | —     | —               | —     | —     | —                          | —              | 2.001             | 34.056            | —    | —   | 0.0  |
| RbBa <sub>2</sub> | HXX               | —                 | $Amm2(38)$        | —                 | — | 7.82               | 7.83  | 60.1  | —               | —     | —     | —                          | —              | 8.47              | 21.284            | —    | —   | 0.9  |
| RbAu <sub>2</sub> | PTX               | $Cmm(65)$         | —                 | $Cmm(65)$         | — | —                  | —     | —     | —               | —     | —     | —                          | —              | 7.81              | 7.82              | —    | —   | 0.0  |
| SrB <sub>2</sub>  | PTX               | $Cmm(65)$         | —                 | $Cmm(65)$         | — | —                  | —     | —     | —               | —     | —     | —                          | —              | 9.20              | 9.20              | —    | —   | 0.0  |
| SrC <sub>2</sub>  | PXX               | —                 | —                 | $P3m1(164)$       | — | —                  | —     | —     | —               | —     | —     | —                          | —              | 12.47             | 12.48             | —    | —   | 0.0  |
| SrN <sub>2</sub>  | PXX               | —                 | —                 | $P3m1(164)$       | — | —                  | —     | —     | —               | —     | —     | —                          | —              | 11.31             | 11.31             | —    | —   | 0.0  |
| SrF <sub>2</sub>  | TPX               | —                 | —                 | $P6mm(183)$       | — | —                  | —     | —     | —               | —     | —     | —                          | —              | 8.10              | 11.48             | —    | —   | 0.0  |
| SrAl <sub>2</sub> | PXX               | —                 | —                 | $P6mm(183)$       | — | —                  | —     | —     | —               | —     | —     | —                          | —              | 0.837             | 7.807             | —    | —   | 0.0  |
| SrSi <sub>2</sub> | TPX               | $C2/m(12)$        | —                 | $P2/c(13)$        | — | 12.31              | 12.31 | 37.3  | —               | —     | —     | —                          | —              | 0.600             | 2.113             | —    | —   | 0.0  |
| SrP <sub>2</sub>  | TPX               | $C2/m(12)$        | —                 | $Cmm(65)$         | — | 11.14              | 11.14 | 37.4  | —               | —     | —     | —                          | —              | 0.837             | 7.807             | —    | —   | 0.0  |
| SrS <sub>2</sub>  | PXX               | —                 | —                 | $P4/mmm(123)$     | — | —                  | —     | —     | —               | —     | —     | —                          | —              | 0.001             | 1.839             | —    | —   | 0.0  |
| SrCl <sub>2</sub> | PTX               | $P\bar{3}m1(164)$ | —                 | $P3m1(164)$       | — | 8.93               | 8.93  | 59.9  | —               | —     | —     | —                          | —              | 4.385             | 4.424             | —    | —   | 0.0  |
| SrK <sub>2</sub>  | HXX               | —                 | $Cmm(65)$         | —                 | — | —                  | —     | —     | —               | 14.81 | 8.76  | 32.3                       | —              | 6.178             | 6.180             | —    | —   | 0.0  |
| SrCa <sub>2</sub> | HXX               | —                 | $Cmm(65)$         | —                 | — | —                  | —     | —     | —               | 7.90  | 13.16 | 34.6                       | —              | 6.776             | 7.510             | —    | —   | 0.0  |
| SrSe <sub>2</sub> | PXX               | —                 | —                 | $P4mm(99)$        | — | —                  | —     | —     | —               | —     | —     | —                          | —              | 10.27             | 7.19              | —    | —   | 0.0  |
| SrGe <sub>2</sub> | TPX               | $C2/m(12)$        | —                 | $Cmm(65)$         | — | 12.13              | 12.13 | 39.3  | —               | —     | —     | —                          | —              | 12.45             | 12.45             | —    | —   | 0.0  |
| SrSe <sub>2</sub> | HXX               | —                 | $P\bar{6}m2(187)$ | —                 | — | —                  | —     | —     | —               | 9.99  | 9.99  | 57.9                       | 60.0           | 2.071             | 5.736             | —    | —   | 0.0  |
| SrBr <sub>2</sub> | PTX               | $P\bar{3}m1(164)$ | —                 | $P\bar{3}m1(164)$ | — | 9.18               | 9.19  | 59.9  | —               | —     | —     | —                          | —              | 0.001             | 1.447             | —    | —   | 0.0  |
| SrSr <sub>2</sub> | HXX               | —                 | $Amm2(38)$        | —                 | — | —                  | —     | —     | —               | 8.55  | 14.45 | 31.6                       | —              | 6.433             | 6.440             | —    | —   | 0.0  |
| SrY <sub>2</sub>  | HXX               | —                 | $P2/c(13)$        | —                 | — | —                  | —     | —     | —               | 8.66  | 13.98 | 28.0                       | —              | 11.818            | 12.121            | —    | —   | 0.0  |
| SrPd <sub>2</sub> | HXX               | —                 | $Pmma(51)$        | —                 | — | —                  | —     | —     | —               | 8.94  | 6.47  | 43.0                       | —              | 5.686             | 7.687             | —    | —   | 0.0  |
| SrAg <sub>2</sub> | HXX               | —                 | $P4/nmm(129)$     | —                 | — | —                  | —     | —     | —               | 7.87  | 11.16 | 44.7                       | —              | 2.038             | 2.070             | —    | —   | 0.0  |
| SrCd <sub>2</sub> | HXX               | —                 | $P2/c(13)$        | —                 | — | —                  | —     | —     | —               | 8.32  | 11.91 | 43.6                       | —              | 1.436             | 2.675             | —    | —   | 0.0  |
| SrIn <sub>2</sub> | HXX               | —                 | $C2/m(12)$        | —                 | — | —                  | —     | —     | —               | 12.52 | 11.36 | 24.8                       | —              | 3.379             | 4.365             | —    | —   | 0.0  |
| SrSn <sub>2</sub> | TPX               | $C2/m(12)$        | —                 | $Cmm(65)$         | — | 12.68              | 12.68 | 42.2  | —               | —     | —     | —                          | —              | 0.389             | 4.638             | 0.0  | —   | 0.0  |
| SrSb <sub>2</sub> | HXX               | —                 | $Cmm(65)$         | —                 | — | —                  | —     | —     | —               | 10.03 | 12.61 | 36.5                       | —              | 1.128             | 3.870             | —    | —   | 0.0  |
| SrI <sub>2</sub>  | PTX               | $P\bar{3}m1(164)$ | —                 | $P\bar{3}m1(164)$ | — | 9.74               | 9.74  | 59.1  | —               | —     | —     | —                          | —              | 9.61              | 9.61              | —    | —   | 0.0  |
| SrCs <sub>2</sub> | HXX               | —                 | $P2/m(10)$        | —                 | — | —                  | —     | —     | —               | 9.91  | 15.60 | 36.5                       | —              | 3.320             | 3.326             | —    | —   | 0.0  |
| SrBa <sub>2</sub> | HXX               | —                 | $Cmm(65)$         | —                 | — | —                  | —     | —     | —               | 8.63  | 14.42 | 33.6                       | —              | 6.319             | 6.612             | —    | —   | 0.0  |
| SrAu <sub>2</sub> | TPH               | $P6/mmm(191)$     | $P\bar{6}m2(187)$ | $Cmm(65)$         | — | 10.80              | 10.84 | 60.1  | 60.0            | 8.49  | 8.59  | 60.0                       | 53.5           | 0.060             | 0.644             | 0.0  | 0.0 | 0.0  |

(Continued on next page)

Table 1: List of stable structures

| species           | Initial structure |                              |                     | space group                  |       |       | lattice parameters |       |       |                |   |                   | relative energy   |        |     | spin moment |       |       |
|-------------------|-------------------|------------------------------|---------------------|------------------------------|-------|-------|--------------------|-------|-------|----------------|---|-------------------|-------------------|--------|-----|-------------|-------|-------|
|                   | indices           | T                            | H                   | P                            | T     |       |                    | H     |       |                | P | $\Delta E_1$ [eV] | $\Delta E_2$ [eV] | T      | H   | P           |       |       |
|                   |                   |                              |                     |                              | a [Å] | b [Å] | $\gamma$ [deg]     | a [Å] | b [Å] | $\gamma$ [deg] |   |                   |                   |        |     |             | a [Å] | b [Å] |
| SrHf <sub>2</sub> | HXX               | —                            | <i>Pmmn</i> (59)    | —                            | —     | —     | 9.48               | 12.86 | 41.3  | —              | — | —                 | 1.553             | 1.834  | —   | —           | —     |       |
| SrTi <sub>2</sub> | HXX               | —                            | <i>Pmna</i> (53)    | —                            | —     | —     | 8.22               | 11.78 | 45.1  | —              | — | —                 | 2.209             | 2.225  | —   | —           | —     |       |
| SrPb <sub>2</sub> | TPX               | <i>C2/m</i> (12)             | —                   | <i>Cmnm</i> (65)             | —     | —     | —                  | —     | —     | —              | — | —                 | 0.402             | 3.960  | 0.0 | 0.0         | —     |       |
| SrBi <sub>2</sub> | HXX               | —                            | <i>Pmna</i> (51)    | —                            | —     | —     | 10.24              | 12.70 | 35.8  | —              | — | —                 | 1.319             | 1.366  | —   | —           | —     |       |
| YB <sub>2</sub>   | PXX               | —                            | —                   | <i>Cmnm</i> (65)             | —     | —     | —                  | —     | —     | —              | — | —                 | 0.002             | 9.924  | 0.0 | 0.0         | —     |       |
| YC <sub>2</sub>   | PXX               | —                            | —                   | <i>Pmnm</i> (59)             | —     | —     | —                  | —     | —     | —              | — | —                 | 3.385             | 6.174  | —   | —           | —     |       |
| YN <sub>2</sub>   | PXX               | —                            | —                   | <i>P4/mmm</i> (123)          | —     | —     | —                  | —     | —     | —              | — | —                 | 1.584             | 13.358 | —   | —           | —     |       |
| YO <sub>2</sub>   | HPX               | —                            | —                   | <i>C2/m</i> (12)             | —     | —     | —                  | —     | —     | —              | — | —                 | 3.184             | 3.324  | —   | —           | —     |       |
| YF <sub>2</sub>   | HPX               | —                            | <i>P6m2</i> (187)   | —                            | —     | —     | 6.85               | 6.85  | 60.0  | —              | — | —                 | 0.756             | 0.865  | —   | —           | —     |       |
| YSi <sub>2</sub>  | HXX               | —                            | <i>Pmna</i> (51)    | —                            | —     | —     | 10.27              | 7.92  | 39.4  | —              | — | —                 | 3.207             | 3.681  | —   | —           | —     |       |
| YP <sub>2</sub>   | HPX               | —                            | <i>P4/mmm</i> (123) | —                            | —     | —     | 10.63              | 7.74  | 43.2  | —              | — | —                 | 0.602             | 1.434  | —   | —           | —     |       |
| YS <sub>2</sub>   | PXX               | —                            | —                   | <i>P1</i> (1)                | —     | —     | —                  | —     | —     | —              | — | —                 | 3.022             | 3.234  | —   | —           | —     |       |
| YCl <sub>2</sub>  | HPX               | —                            | <i>P6m2</i> (187)   | —                            | —     | —     | 7.53               | 7.52  | 59.8  | —              | — | —                 | 0.685             | 0.867  | —   | —           | —     |       |
| YGe <sub>2</sub>  | PTX               | <i>C2/m</i> (12)             | —                   | <i>P2/c</i> (13)             | —     | —     | 10.75              | 10.75 | 42.9  | —              | — | —                 | 0.387             | 4.699  | 0.0 | 0.0         | —     |       |
| YAs <sub>2</sub>  | HXX               | —                            | <i>P4/mmm</i> (123) | —                            | —     | —     | 7.85               | 11.13 | 42.7  | —              | — | —                 | 2.041             | 2.109  | —   | —           | —     |       |
| YSe <sub>2</sub>  | PXX               | —                            | —                   | <i>P1</i> (1)                | —     | —     | —                  | —     | —     | —              | — | —                 | 1.937             | 1.979  | —   | —           | —     |       |
| YBr <sub>2</sub>  | HPT               | <i>P3m1</i> (164)            | —                   | <i>P6m2</i> (187)            | —     | —     | 7.91               | 7.90  | 58.4  | —              | — | —                 | 0.601             | 0.698  | 0.0 | 3.9         | 0.9   |       |
| YY <sub>2</sub>   | PXX               | —                            | —                   | <i>P1</i> (1)                | —     | —     | —                  | —     | —     | —              | — | —                 | 3.582             | 4.649  | —   | —           | —     |       |
| YZr <sub>2</sub>  | HXX               | —                            | <i>Cmme</i> (67)    | —                            | —     | —     | 11.03              | 9.78  | 27.6  | —              | — | —                 | 0.007             | 2.366  | 0.0 | 0.0         | —     |       |
| YSh <sub>2</sub>  | HXX               | —                            | <i>Pmnm</i> (47)    | —                            | —     | —     | 9.40               | 11.44 | 34.7  | —              | — | —                 | 3.455             | 5.582  | —   | —           | —     |       |
| YI <sub>2</sub>   | HPT               | <i>P3m1</i> (164)            | —                   | <i>P6m2</i> (187)            | —     | —     | 8.39               | 8.39  | 58.9  | —              | — | —                 | 0.339             | 0.412  | 0.0 | 3.7         | 0.8   |       |
| YPb <sub>2</sub>  | PTH               | —                            | <i>Pmnm</i> (47)    | —                            | —     | —     | 11.67              | 9.46  | 35.7  | —              | — | —                 | 0.012             | 0.023  | 0.0 | 0.0         | —     |       |
| YBi <sub>2</sub>  | THX               | <i>P4/mmm</i> (123)          | —                   | <i>P4/mmm</i> (123)          | —     | —     | 8.65               | 11.78 | 41.7  | —              | — | —                 | 0.003             | 2.813  | 0.0 | 0.0         | —     |       |
| ZrB <sub>2</sub>  | PXX               | —                            | —                   | <i>P4/mmm</i> (129)          | —     | —     | —                  | —     | —     | —              | — | —                 | 6.083             | 6.270  | —   | —           | —     |       |
| ZrB <sub>2</sub>  | PHT               | <i>P2/c</i> (13)             | —                   | <i>P2/c</i> (13)             | —     | —     | 8.79               | 8.74  | 41.0  | —              | — | —                 | 0.003             | 0.004  | 0.0 | 0.0         | —     |       |
| ZrC <sub>2</sub>  | PTX               | <i>P1</i> (2)                | —                   | <i>P1</i> (2)                | —     | —     | 7.66               | 8.50  | 44.5  | —              | — | —                 | 0.479             | 5.712  | 0.0 | —           | —     |       |
| ZrN <sub>2</sub>  | HPX               | —                            | <i>P6m2</i> (187)   | —                            | —     | —     | —                  | —     | —     | —              | — | —                 | 0.260             | 7.170  | —   | —           | —     |       |
| ZrO <sub>2</sub>  | HXX               | —                            | <i>Pmnm</i> (59)    | —                            | —     | —     | 5.19               | 6.59  | 50.6  | —              | — | —                 | 1.087             | 1.287  | —   | —           | —     |       |
| ZrF <sub>2</sub>  | HXX               | —                            | <i>P6m2</i> (187)   | —                            | —     | —     | 6.23               | 6.23  | 60.0  | —              | — | —                 | 0.876             | 0.892  | —   | —           | —     |       |
| ZrMg <sub>2</sub> | TXX               | —                            | —                   | —                            | —     | —     | 6.58               | 9.37  | 42.1  | —              | — | —                 | 1.262             | 14.651 | 0.0 | —           | —     |       |
| ZrSi <sub>2</sub> | HXX               | —                            | <i>Pmna</i> (51)    | —                            | —     | —     | 9.67               | 7.38  | 40.2  | —              | — | —                 | 2.408             | 7.072  | —   | —           | —     |       |
| ZrP <sub>2</sub>  | HXX               | —                            | <i>P6m2</i> (187)   | —                            | —     | —     | 8.14               | 8.13  | 59.8  | —              | — | —                 | 1.562             | 9.368  | —   | —           | —     |       |
| ZrS <sub>2</sub>  | TXX               | —                            | —                   | —                            | —     | —     | —                  | —     | —     | —              | — | —                 | 0.872             | 2.041  | 0.0 | —           | —     |       |
| ZrCl <sub>2</sub> | HTP               | <i>P3m1</i> (164)            | —                   | <i>P6m2</i> (187)            | —     | —     | 7.38               | 7.38  | 59.9  | —              | — | —                 | 0.436             | 0.440  | 0.0 | 0.0         | —     |       |
| ZrCs <sub>2</sub> | THX               | <i>P2<sub>1</sub>/m</i> (11) | —                   | <i>P6m2</i> (187)            | —     | —     | 7.11               | 6.71  | 61.8  | —              | — | —                 | 0.017             | 13.243 | 0.0 | 0.0         | —     |       |
| ZrTi <sub>2</sub> | HXX               | —                            | <i>P4/mmm</i> (123) | —                            | —     | —     | 10.16              | 7.18  | 44.9  | —              | — | —                 | 2.361             | 6.522  | —   | —           | —     |       |
| ZrCr <sub>2</sub> | HXX               | —                            | <i>P2/c</i> (13)    | —                            | —     | —     | 5.76               | 9.53  | 35.4  | —              | — | —                 | 7.350             | 13.581 | —   | —           | —     |       |
| ZrGe <sub>2</sub> | HPX               | —                            | <i>Cmnm</i> (65)    | —                            | —     | —     | 6.06               | 9.42  | 39.0  | —              | — | —                 | 0.736             | 4.903  | —   | —           | —     |       |
| ZrSe <sub>2</sub> | TXX               | —                            | <i>Pmnm</i> (47)    | —                            | —     | —     | 8.50               | 10.32 | 34.5  | —              | — | —                 | 1.099             | 1.565  | 0.0 | —           | —     |       |
| ZrBr <sub>2</sub> | HXX               | —                            | <i>P6m2</i> (187)   | —                            | —     | —     | 7.58               | 7.58  | 60.0  | —              | — | —                 | 0.024             | 0.028  | 0.0 | 0.0         | —     |       |
| ZrNb <sub>2</sub> | HXX               | —                            | —                   | <i>P2<sub>1</sub>/m</i> (11) | —     | —     | 7.01               | 7.40  | 61.6  | —              | — | —                 | 0.765             | 14.293 | 0.0 | 0.0         | —     |       |
| ZrIn <sub>2</sub> | TPH               | <i>P1</i> (2)                | —                   | <i>P2/c</i> (13)             | —     | —     | 10.55              | 8.26  | 31.9  | —              | — | —                 | 0.238             | 0.516  | 0.0 | 0.0         | —     |       |
| ZrPd <sub>2</sub> | PTH               | <i>P4/mmm</i> (123)          | —                   | <i>P4/mmm</i> (123)          | —     | —     | 8.79               | 6.31  | 42.6  | —              | — | —                 | 0.014             | 0.372  | 0.0 | 0.0         | —     |       |
| ZrIn <sub>2</sub> | HPT               | <i>Pmna</i> (51)             | —                   | <i>Pmna</i> (51)             | —     | —     | 6.32               | 8.90  | 45.2  | —              | — | —                 | 0.061             | 0.091  | 0.0 | 0.0         | —     |       |
| ZrSn <sub>2</sub> | PTH               | —                            | <i>Pmnm</i> (47)    | —                            | —     | —     | 8.90               | 10.88 | 35.0  | —              | — | —                 | 1.091             | 1.342  | 0.0 | —           | —     |       |
| ZrTe <sub>2</sub> | TXX               | —                            | <i>P3m1</i> (164)   | —                            | —     | —     | 7.95               | 7.94  | 59.9  | —              | — | —                 | 0.035             | 0.337  | 0.0 | 0.0         | —     |       |
| ZrTe <sub>2</sub> | TPH               | <i>P2<sub>1</sub>/m</i> (11) | —                   | <i>P6m2</i> (187)            | —     | —     | 7.57               | 7.88  | 61.3  | —              | — | —                 | 0.404             | 3.838  | —   | —           | —     |       |
| ZrHf <sub>2</sub> | HPX               | —                            | <i>C2/m</i> (12)    | —                            | —     | —     | 8.59               | 9.71  | 40.1  | —              | — | —                 | 0.009             | 7.649  | 0.0 | 0.0         | —     |       |
| ZrAu <sub>2</sub> | HXX               | —                            | <i>P4/mmm</i> (123) | —                            | —     | —     | 8.64               | 6.12  | 45.1  | —              | — | —                 | 0.755             | 9.882  | 0.0 | 0.0         | —     |       |
| ZrTi <sub>2</sub> | THX               | <i>P4/mmm</i> (123)          | —                   | <i>Pmna</i> (51)             | —     | —     | 9.89               | 7.07  | 43.7  | —              | — | —                 | 0.916             | 0.927  | —   | —           | —     |       |
| ZrPb <sub>2</sub> | PXX               | —                            | —                   | —                            | —     | —     | —                  | —     | —     | —              | — | —                 | 1.087             | 4.002  | —   | —           | —     |       |
| ZrBi <sub>2</sub> | THX               | —                            | <i>P4/mmm</i> (123) | —                            | —     | —     | 7.84               | 5.43  | 43.8  | —              | — | —                 | 3.852             | 11.023 | —   | —           | —     |       |
| NbBe <sub>2</sub> | PXX               | —                            | —                   | <i>C2/m</i> (12)             | —     | —     | 6.21               | 6.18  | 60.2  | —              | — | —                 | 0.651             | 1.777  | 0.0 | 0.0         | —     |       |
| NbO <sub>2</sub>  | THX               | —                            | <i>P6m2</i> (187)   | —                            | —     | —     | 6.58               | 6.46  | 52.4  | —              | — | —                 | 2.240             | 4.478  | —   | —           | —     |       |
| NbF <sub>2</sub>  | HXX               | —                            | <i>P1</i> (2)       | —                            | —     | —     | 7.44               | 9.41  | 37.8  | —              | — | —                 | 0.004             | 8.037  | 0.0 | 0.0         | —     |       |
| NbAl <sub>2</sub> | HXX               | —                            | <i>Pmnm</i> (47)    | —                            | —     | —     | 9.41               | 7.43  | 37.8  | —              | — | —                 | 0.163             | 1.567  | 0.0 | 0.0         | —     |       |
| NbP <sub>2</sub>  | THX               | <i>P1</i> (2)                | —                   | <i>P6m2</i> (187)            | —     | —     | 7.57               | 7.86  | 44.9  | —              | — | —                 | —                 | —      | —   | —           | —     |       |

(Continued on next page)

Table 1: List of stable structures

| species           | Initial structure |                                | space group                    |                                |       | lattice parameters |                |       |       |                |                   | relative energy   |                            |        | spin moment    |      |      |      |
|-------------------|-------------------|--------------------------------|--------------------------------|--------------------------------|-------|--------------------|----------------|-------|-------|----------------|-------------------|-------------------|----------------------------|--------|----------------|------|------|------|
|                   | indices           | T                              | H                              | P                              | T     |                    |                | H     |       |                | $\Delta E_1$ [eV] | $\Delta E_2$ [eV] | $[\mu_B/\text{unit cell}]$ |        |                |      |      |      |
|                   |                   |                                |                                |                                | a [Å] | b [Å]              | $\gamma$ [deg] | a [Å] | b [Å] | $\gamma$ [deg] |                   |                   | a [Å]                      | b [Å]  | $\gamma$ [deg] | T    | H    | P    |
| NbS <sub>2</sub>  | HPT               | <i>P</i> 3m1(164)              | <i>P</i> 6m2(187)              | <i>C</i> 2/m(12)               | 6.77  | 6.77               | 60.0           | 6.72  | 6.73  | 59.7           | 6.13              | 7.70              | 55.4                       | 0.379  | 0.410          | 0.0  | 0.0  | 0.0  |
| NbCl <sub>2</sub> | HXX               | —                              | <i>P</i> mm2(25)               | —                              | —     | —                  | 6.74           | 6.60  | 60.6  | —              | —                 | —                 | —                          | 3.274  | 3.278          | —    | 0.0  | —    |
| NbCa <sub>2</sub> | THX               | <i>P</i> 2 <sub>1</sub> /m(11) | <i>P</i> mma(51)               | —                              | 6.86  | 10.30              | 48.0           | 6.92  | 10.11 | 46.5           | —                 | —                 | —                          | 0.468  | 14.491         | 0.0  | 0.0  | —    |
| NbV <sub>2</sub>  | PXX               | —                              | —                              | <i>P</i> 1(1)                  | —     | —                  | —              | —     | —     | —              | 6.48              | 6.49              | 49.9                       | 0.861  | 1.278          | —    | —    | —    |
| NbGa <sub>2</sub> | THX               | <i>P</i> mmm(47)               | <i>P</i> mmm(47)               | —                              | 7.41  | 9.47               | 38.3           | 7.46  | 9.50  | 38.1           | —                 | —                 | —                          | 0.109  | 10.646         | 0.0  | 0.0  | —    |
| NbSe <sub>2</sub> | HPT               | <i>P</i> 3m1(164)              | <i>P</i> 6m2(187)              | <i>C</i> 2/m(12)               | 6.96  | 6.96               | 59.9           | 6.95  | 6.94  | 60.0           | 6.35              | 6.85              | 74.3                       | 0.171  | 0.417          | 0.0  | 0.0  | 0.0  |
| NbBr <sub>2</sub> | HXX               | —                              | <i>P</i> mm2(25)               | —                              | —     | —                  | —              | 7.09  | 7.09  | 57.9           | —                 | —                 | —                          | 2.904  | 2.906          | —    | —    | —    |
| NbNb <sub>2</sub> | HPT               | <i>P</i> 2/c(13)               | <i>P</i> 2/c(13)               | —                              | 8.44  | 8.19               | 38.4           | 8.44  | 8.19  | 38.4           | —                 | —                 | —                          | 0.005  | 3.812          | 0.0  | 0.0  | —    |
| NbRu <sub>2</sub> | THX               | <i>P</i> 2 <sub>1</sub> /m(11) | <i>P</i> 6m2(187)              | —                              | 9.02  | 7.79               | 30.2           | 9.02  | 7.79  | 30.2           | —                 | —                 | —                          | 2.016  | 2.038          | 0.0  | —    | —    |
| NbTe <sub>2</sub> | THX               | <i>P</i> 2 <sub>1</sub> /m(11) | <i>P</i> 6m2(187)              | —                              | 7.52  | 7.51               | 54.3           | 7.40  | 7.40  | 60.0           | —                 | —                 | —                          | 0.124  | 1.416          | 0.0  | 0.0  | —    |
| NbI <sub>2</sub>  | HXX               | —                              | <i>P</i> mm2(25)               | —                              | —     | —                  | —              | 7.65  | 7.65  | 57.4           | —                 | —                 | —                          | 1.714  | 1.715          | —    | —    | —    |
| NbBi <sub>2</sub> | TPX               | <i>C</i> 2/m(12)               | —                              | <i>P</i> 1(2)                  | 7.07  | 7.08               | 54.3           | 8.81  | 8.21  | 21.2           | 8.09              | 8.85              | 44.5                       | 0.312  | 4.848          | 0.0  | 0.0  | —    |
| MoBe <sub>2</sub> | HPT               | <i>C</i> mm(65)                | <i>P</i> mm2(25)               | —                              | 5.16  | 8.03               | 38.9           | 5.16  | 8.03  | 38.9           | —                 | —                 | —                          | 0.355  | 6.371          | 0.0  | 0.0  | —    |
| MoN <sub>2</sub>  | THX               | —                              | —                              | —                              | 6.49  | 6.50               | 55.7           | 6.49  | 6.50  | 55.7           | —                 | —                 | —                          | 1.347  | 2.470          | 0.0  | —    | —    |
| MoO <sub>2</sub>  | HXX               | —                              | <i>P</i> 6m2(187)              | —                              | —     | —                  | —              | 5.69  | 5.68  | 60.0           | —                 | —                 | —                          | 2.347  | 2.376          | —    | —    | —    |
| MoF <sub>2</sub>  | HXX               | —                              | <i>P</i> 2/m(10)               | —                              | —     | —                  | —              | 7.42  | 5.75  | 52.0           | 7.58              | 6.86              | 38.4                       | 6.516  | 6.522          | —    | —    | —    |
| MoP <sub>2</sub>  | PXX               | —                              | —                              | <i>P</i> 1(1)                  | —     | —                  | —              | —     | —     | —              | 6.14              | 6.91              | 63.6                       | 1.556  | 1.700          | —    | —    | —    |
| MoS <sub>2</sub>  | HXX               | —                              | —                              | <i>P</i> 2 <sub>1</sub> /m(11) | —     | —                  | —              | —     | —     | —              | —                 | —                 | —                          | 1.389  | 3.230          | —    | —    | —    |
| MoCl <sub>2</sub> | HXX               | —                              | <i>P</i> 6m2(187)              | —                              | —     | —                  | —              | 6.39  | 6.39  | 60.0           | —                 | —                 | —                          | 2.625  | 3.668          | —    | —    | —    |
| MoMn <sub>2</sub> | PTH               | <i>C</i> 2/m(12)               | <i>C</i> mm(65)                | —                              | 8.81  | 8.81               | 49.2           | 8.21  | 8.21  | 52.9           | 7.99              | 8.00              | 64.2                       | 0.039  | 0.176          | 16.0 | 16.0 | 16.0 |
| MoSe <sub>2</sub> | THX               | <i>P</i> 4/mmm(123)            | <i>P</i> 4/mmm(123)            | —                              | 6.15  | 8.72               | 43.9           | 6.07  | 8.59  | 45.0           | —                 | —                 | —                          | 0.406  | 12.003         | 26.2 | 26.1 | —    |
| MoSb <sub>2</sub> | HXX               | —                              | <i>P</i> 6m2(187)              | —                              | —     | —                  | —              | 6.65  | 6.65  | 60.1           | —                 | —                 | —                          | 1.444  | 1.489          | —    | —    | —    |
| MoY <sub>2</sub>  | THP               | <i>C</i> 2/m(12)               | <i>C</i> mm(65)                | —                              | 8.92  | 8.92               | 50.9           | 8.32  | 8.31  | 54.8           | 14.76             | 7.59              | 74.9                       | 0.198  | 0.629          | 16.0 | 16.0 | 16.0 |
| MoIn <sub>2</sub> | PXX               | —                              | <i>P</i> mm(47)                | —                              | —     | —                  | —              | 6.81  | 9.50  | 44.0           | 8.88              | 7.07              | 53.3                       | 0.460  | 0.934          | —    | —    | —    |
| MoTi <sub>2</sub> | HXX               | —                              | <i>P</i> 1(2)                  | —                              | —     | —                  | —              | 6.42  | 9.25  | 38.8           | —                 | —                 | —                          | 9.001  | 9.719          | —    | —    | —    |
| MoSb <sub>2</sub> | HXX               | <i>C</i> 2/m(12)               | <i>P</i> 6m2(187)              | —                              | 9.19  | 9.19               | 42.4           | 7.84  | 7.94  | 59.2           | —                 | —                 | —                          | 0.638  | 7.676          | 0.0  | 0.0  | —    |
| MoTe <sub>2</sub> | THP               | <i>P</i> 2 <sub>1</sub> /m(11) | <i>P</i> 6m2(187)              | —                              | 7.29  | 7.28               | 57.3           | 7.16  | 7.16  | 60.1           | 7.31              | 7.31              | 57.0                       | 0.006  | 0.064          | 0.0  | 0.0  | —    |
| MoI <sub>2</sub>  | THX               | <i>C</i> 2/m(12)               | <i>C</i> mm(65)                | —                              | 9.33  | 9.33               | 51.8           | 8.96  | 8.97  | 54.0           | —                 | —                 | —                          | 0.269  | 2.477          | 15.9 | 16.0 | —    |
| MoTi <sub>2</sub> | HXX               | —                              | <i>A</i> mm2(38)               | —                              | —     | —                  | —              | 8.14  | 9.52  | 27.5           | —                 | —                 | —                          | 12.878 | 12.901         | —    | —    | —    |
| MoBi <sub>2</sub> | THX               | <i>P</i> 1(2)                  | —                              | —                              | 6.70  | 7.90               | 51.7           | 7.99  | 6.00  | 41.4           | —                 | —                 | —                          | 0.960  | 1.056          | 0.0  | —    | —    |
| TcBe <sub>2</sub> | HXX               | <i>P</i> 1(2)                  | <i>P</i> mma(51)               | —                              | 7.50  | 6.57               | 33.5           | 7.50  | 6.57  | 33.5           | —                 | —                 | —                          | 0.715  | 3.892          | 0.0  | —    | —    |
| TcC <sub>2</sub>  | PXX               | —                              | —                              | <i>P</i> 1(2)                  | —     | —                  | —              | 5.74  | 5.75  | 60.1           | 7.13              | 7.91              | 41.1                       | 5.542  | 6.515          | —    | —    | —    |
| TcN <sub>2</sub>  | PTH               | <i>P</i> 1(1)                  | <i>P</i> 6m2(187)              | —                              | 6.34  | 6.09               | 59.0           | 6.34  | 6.09  | 59.0           | 6.98              | 6.22              | 59.9                       | 0.406  | 0.515          | 0.0  | 0.3  | —    |
| TcO <sub>2</sub>  | TPX               | <i>P</i> 1(2)                  | —                              | <i>P</i> 1(2)                  | 5.77  | 5.70               | 59.9           | —     | —     | —              | 5.70              | 5.77              | 60.0                       | 0.022  | 3.508          | 0.0  | —    | —    |
| TcF <sub>2</sub>  | PXX               | —                              | —                              | <i>P</i> 1(2)                  | —     | —                  | —              | —     | —     | —              | 6.92              | 6.66              | 60.7                       | 0.992  | 2.717          | —    | —    | —    |
| TcSi <sub>2</sub> | THX               | <i>C</i> 2/m(12)               | <i>A</i> mm2(38)               | —                              | 8.59  | 8.59               | 40.4           | 7.47  | 7.49  | 51.3           | —                 | —                 | —                          | 0.278  | 0.964          | 0.0  | 0.0  | —    |
| TcP <sub>2</sub>  | HXX               | —                              | <i>A</i> mm2(38)               | —                              | 6.60  | 6.54               | 58.6           | 7.28  | 7.28  | 52.2           | —                 | —                 | —                          | 1.228  | 1.912          | —    | —    | —    |
| TcS <sub>2</sub>  | PTX               | <i>P</i> 1(2)                  | —                              | <i>P</i> 1(2)                  | —     | —                  | —              | 8.64  | 6.11  | 45.0           | 6.43              | 6.60              | 60.2                       | 0.000  | 1.813          | 0.0  | —    | —    |
| TcTi <sub>2</sub> | HXX               | —                              | <i>P</i> 4/mmm(123)            | —                              | —     | —                  | —              | —     | —     | —              | 9.01              | 7.21              | 35.2                       | 2.589  | 2.619          | —    | —    | —    |
| TcV <sub>2</sub>  | PXX               | —                              | —                              | <i>P</i> 2/c(13)               | —     | —                  | —              | 8.32  | 5.82  | 45.4           | —                 | —                 | —                          | 0.042  | 11.865         | 29.7 | 12.6 | —    |
| TcMn <sub>2</sub> | THX               | <i>P</i> 4/mmm(123)            | <i>P</i> 4/mmm(123)            | —                              | 8.44  | 5.97               | 44.9           | 8.32  | 5.82  | 45.4           | 6.67              | 6.80              | 61.2                       | 0.004  | 1.746          | 0.0  | —    | —    |
| TcS <sub>2</sub>  | TPX               | <i>P</i> 1(2)                  | <i>P</i> 4/mmm(123)            | —                              | 6.67  | 6.86               | 60.3           | 9.74  | 6.89  | 45.0           | —                 | —                 | —                          | 1.260  | 1.275          | —    | —    | —    |
| TcY <sub>2</sub>  | HXX               | —                              | <i>P</i> 6m2(187)              | —                              | —     | —                  | —              | 6.65  | 6.65  | 60.0           | —                 | —                 | —                          | 3.596  | 11.384         | —    | —    | —    |
| TcSb <sub>2</sub> | HXX               | —                              | —                              | <i>P</i> 1(2)                  | —     | —                  | —              | —     | —     | —              | 7.32              | 7.29              | 58.2                       | 0.013  | 1.768          | 0.0  | —    | —    |
| TcTe <sub>2</sub> | TPX               | <i>P</i> 1(2)                  | —                              | <i>P</i> 1(2)                  | 7.31  | 7.27               | 58.5           | —     | —     | —              | —                 | —                 | —                          | 2.457  | 3.271          | 4.0  | —    | —    |
| TcI <sub>2</sub>  | THX               | <i>P</i> 3m1(164)              | —                              | —                              | 8.19  | 8.19               | 57.3           | —     | —     | —              | —                 | —                 | —                          | 0.488  | 0.844          | 0.0  | —    | —    |
| TcTa <sub>2</sub> | THX               | <i>C</i> 2/m(12)               | <i>P</i> 2/c(13)               | —                              | 8.15  | 8.89               | 35.1           | 7.50  | 9.08  | 38.3           | —                 | —                 | —                          | 0.004  | 1.746          | 0.0  | —    | —    |
| TcBi <sub>2</sub> | PXX               | —                              | <i>P</i> 6m2(187)              | —                              | —     | —                  | —              | 6.89  | 6.88  | 60.1           | 7.30              | 8.47              | 46.4                       | 1.933  | 5.762          | —    | —    | —    |
| RuBe <sub>2</sub> | HXX               | —                              | <i>P</i> mma(51)               | —                              | —     | —                  | —              | 5.71  | 8.08  | 45.0           | —                 | —                 | —                          | 0.004  | 1.746          | 0.0  | —    | —    |
| RuC <sub>2</sub>  | PXX               | —                              | —                              | <i>C</i> 2/m(12)               | —     | —                  | —              | —     | —     | —              | 7.23              | 8.98              | 36.9                       | 3.319  | 7.440          | —    | —    | —    |
| RuN <sub>2</sub>  | PXX               | —                              | —                              | <i>C</i> 2/m(12)               | 6.19  | 5.77               | 57.7           | —     | —     | —              | 6.80              | 7.22              | 76.4                       | 4.664  | 5.141          | —    | —    | —    |
| RuO <sub>2</sub>  | TPX               | <i>P</i> 2 <sub>1</sub> /m(11) | —                              | <i>P</i> 2 <sub>1</sub> /m(11) | 7.14  | 6.99               | 51.8           | —     | —     | —              | 5.78              | 6.19              | 57.6                       | 0.066  | 3.979          | 0.0  | —    | —    |
| RuF <sub>2</sub>  | PTX               | <i>P</i> 1(2)                  | <i>C</i> mm(8)                 | —                              | 8.44  | 5.97               | 45.0           | 8.41  | 5.95  | 45.0           | 6.59              | 6.17              | 60.9                       | 0.793  | 0.962          | 15.9 | —    | —    |
| RuAl <sub>2</sub> | HPT               | <i>P</i> 4/nmm(129)            | <i>P</i> 4/nmm(129)            | —                              | 7.89  | 7.89               | 43.4           | 7.58  | 7.59  | 45.9           | 5.88              | 8.04              | 68.5                       | 0.178  | 8.136          | 0.0  | 0.0  | —    |
| RuP <sub>2</sub>  | PHT               | <i>P</i> 2 <sub>1</sub> /m(11) | <i>P</i> mm2 <sub>1</sub> (31) | —                              | 6.94  | 6.60               | 58.3           | —     | —     | —              | 6.91              | 6.57              | 58.3                       | 0.004  | 0.305          | 0.0  | 0.0  | —    |
| RuS <sub>2</sub>  | TPX               | <i>P</i> 2 <sub>1</sub> /m(11) | —                              | <i>C</i> 2/m(12)               | 7.24  | 7.24               | 59.9           | —     | —     | —              | —                 | —                 | —                          | 0.210  | 3.164          | 0.0  | —    | —    |
| RuCl <sub>2</sub> | THX               | <i>P</i> 3m1(164)              | —                              | —                              | —     | —                  | —              | —     | —     | —              | —                 | —                 | —                          | 3.699  | 4.041          | 0.0  | —    | —    |

(Continued on next page)

Table 1: List of stable structures

| species           | Initial structure indices | space group   |               |               | lattice parameters |       |       |                |       |       | relative energy |                | spin moment |              |              |                |        |      |                            |     |
|-------------------|---------------------------|---------------|---------------|---------------|--------------------|-------|-------|----------------|-------|-------|-----------------|----------------|-------------|--------------|--------------|----------------|--------|------|----------------------------|-----|
|                   |                           | T             | H             | P             | T                  |       |       | H              |       |       | P               |                |             | $\Delta E_1$ | $\Delta E_2$ | T              | H      | P    |                            |     |
|                   |                           | a [Å]         | b [Å]         | c [Å]         | a [Å]              | b [Å] | c [Å] | $\gamma$ [deg] | a [Å] | b [Å] | c [Å]           | $\gamma$ [deg] | a [Å]       | b [Å]        | c [Å]        | $\gamma$ [deg] | [eV]   | [eV] | $[\mu_B/\text{unit cell}]$ |     |
| RuCu <sub>2</sub> | TXX                       | $P2_1/m(11)$  | —             | —             | 8.83               | 7.22  | 52.3  | 6.40           | 9.05  | 45.0  | —               | 7.17           | 7.16        | —            | —            | 1.040          | 1.344  | 0.0  | —                          | —   |
| RuSc <sub>2</sub> | HPX                       | —             | $P4/mmm(123)$ | $P4/mmm(123)$ | —                  | —     | —     | 5.93           | 8.40  | 44.6  | —               | —              | —           | —            | —            | 0.053          | 1.564  | —    | 0.0                        | 0.0 |
| RuTi <sub>2</sub> | HXX                       | —             | $P4/mmm(123)$ | $P4/mmm(123)$ | —                  | —     | —     | 7.53           | 8.24  | 34.8  | —               | —              | —           | —            | —            | 0.919          | 1.873  | —    | 0.0                        | 0.0 |
| RuV <sub>2</sub>  | THX                       | $C2/m(12)$    | $C2/m(12)$    | $C2/m(12)$    | —                  | —     | —     | 8.41           | 5.93  | 46.1  | —               | —              | —           | —            | —            | 0.353          | 1.832  | 0.0  | 0.0                        | —   |
| RuMn <sub>2</sub> | HXX                       | —             | $P4/mmm(123)$ | $P4/mmm(123)$ | —                  | —     | —     | 7.22           | 6.86  | 58.2  | —               | —              | —           | —            | —            | 2.015          | 11.563 | —    | 33.2                       | —   |
| RuSe <sub>2</sub> | TXX                       | $P2_1/m(11)$  | —             | —             | 7.63               | 7.63  | 59.9  | 6.79           | 9.60  | 45.0  | —               | 8.98           | 7.56        | —            | —            | 1.206          | 4.004  | 0.0  | —                          | —   |
| RuBr <sub>2</sub> | $P3m1(164)$               | —             | $P4/mmm(123)$ | $C2/m(12)$    | —                  | —     | —     | 8.15           | 9.42  | 30.0  | —               | —              | —           | —            | —            | 4.418          | 1.389  | —    | 0.0                        | 0.0 |
| RuY <sub>2</sub>  | HPX                       | $C2/m(12)$    | —             | —             | —                  | —     | —     | —              | —     | —     | —               | —              | —           | —            | —            | 4.418          | 5.983  | 0.0  | —                          | —   |
| RuTe <sub>2</sub> | TXX                       | —             | $P2/c(13)$    | $P2/c(13)$    | —                  | —     | —     | 8.06           | 6.89  | 38.8  | —               | —              | —           | —            | —            | 1.030          | 5.235  | —    | 0.0                        | —   |
| RuRu <sub>2</sub> | HXX                       | —             | $P6m2(187)$   | $P6m2(187)$   | —                  | —     | —     | 5.51           | 5.51  | 59.8  | —               | —              | —           | —            | —            | 6.269          | 7.276  | —    | 0.0                        | —   |
| RuPd <sub>2</sub> | TXX                       | $P1(2)$       | —             | —             | 7.19               | 7.32  | 59.7  | —              | —     | —     | —               | —              | —           | —            | —            | 0.833          | 11.598 | 0.0  | —                          | —   |
| RuSb <sub>2</sub> | TPX                       | $P2_1/m(11)$  | —             | —             | 7.30               | 7.69  | 58.3  | 6.93           | 8.12  | 45.8  | —               | 7.33           | 7.72        | —            | —            | 0.017          | 1.365  | 0.0  | —                          | 0.0 |
| RuTe <sub>2</sub> | HTX                       | $C2/m(12)$    | $C2/m(12)$    | $P2_1/m(11)$  | —                  | —     | —     | 8.83           | 8.10  | 35.0  | —               | —              | —           | —            | —            | 0.412          | 7.279  | 0.0  | 0.0                        | —   |
| RuOs <sub>2</sub> | TXX                       | $P2_1/m(11)$  | —             | —             | 8.36               | 8.36  | 37.6  | 5.54           | 7.85  | 45.2  | —               | —              | —           | —            | —            | 2.801          | 5.282  | 0.0  | —                          | —   |
| RuLi <sub>2</sub> | PTH                       | $P4/mmm(123)$ | $P4/mmm(123)$ | $C2/m(12)$    | —                  | —     | —     | 7.96           | 7.94  | 42.9  | —               | 7.00           | 7.05        | —            | —            | 0.133          | 0.149  | 0.0  | 0.0                        | —   |
| RhBe <sub>2</sub> | PXX                       | —             | $P4/mmm(123)$ | $P4/mmm(123)$ | —                  | —     | —     | 7.53           | 7.53  | 48.0  | —               | —              | —           | —            | —            | 1.291          | 2.630  | —    | 0.0                        | —   |
| RhB <sub>2</sub>  | TPX                       | —             | —             | —             | 7.53               | 7.53  | 48.0  | 8.14           | 5.75  | 43.3  | —               | —              | —           | —            | —            | 0.399          | 8.642  | 0.0  | —                          | —   |
| RhO <sub>2</sub>  | TPX                       | —             | —             | —             | 6.17               | 6.16  | 59.9  | 6.43           | 6.38  | 58.1  | —               | —              | —           | —            | —            | 0.026          | 4.539  | 0.0  | —                          | —   |
| RhF <sub>2</sub>  | PXX                       | —             | —             | —             | 7.66               | 8.15  | 50.3  | 7.93           | 7.92  | 40.0  | —               | —              | —           | —            | —            | 2.132          | 4.657  | —    | 4.0                        | —   |
| RhP <sub>2</sub>  | THP                       | $P1(1)$       | $Pc(7)$       | $P1(1)$       | —                  | —     | —     | 7.13           | 7.06  | 54.0  | —               | 7.13           | 7.06        | —            | —            | 0.007          | 0.413  | 0.0  | 0.0                        | —   |
| RhS <sub>2</sub>  | TPX                       | $P1(2)$       | —             | —             | 7.13               | 7.06  | 54.0  | —              | —     | —     | —               | 7.09           | 8.58        | —            | —            | 0.904          | 2.281  | —    | 0.0                        | —   |
| RhGa <sub>2</sub> | THX                       | $C2/m(12)$    | $Am2(38)$     | $C2/m(12)$    | —                  | —     | —     | 7.96           | 7.94  | 42.9  | —               | 7.00           | 7.05        | —            | —            | 0.346          | 4.161  | 0.0  | 0.0                        | —   |
| RhAs <sub>2</sub> | PXX                       | —             | —             | —             | 7.46               | 7.39  | 53.3  | —              | —     | —     | —               | —              | —           | —            | —            | 1.109          | 1.242  | —    | 0.0                        | —   |
| RhSe <sub>2</sub> | TXX                       | $P1(2)$       | —             | —             | 8.22               | 8.23  | 59.9  | 8.14           | 5.75  | 43.3  | —               | 10.37          | 8.57        | —            | —            | 2.124          | 2.438  | 0.0  | —                          | —   |
| RhY <sub>2</sub>  | PTH                       | $P3m1(164)$   | —             | —             | —                  | —     | —     | —              | —     | —     | —               | —              | —           | —            | —            | 0.349          | 2.516  | 0.0  | —                          | —   |
| RhAg <sub>2</sub> | HXX                       | —             | $Pnmm(47)$    | $Pnmm(47)$    | —                  | —     | —     | 7.97           | 7.92  | 52.7  | —               | —              | —           | —            | —            | 8.602          | 8.637  | —    | 0.0                        | —   |
| RhIn <sub>2</sub> | TXX                       | $P1(2)$       | $P6m2(187)$   | $P6m2(187)$   | —                  | —     | —     | 8.08           | 8.08  | 59.9  | —               | —              | —           | —            | —            | 1.550          | 1.883  | —    | 0.0                        | —   |
| RhTe <sub>2</sub> | THX                       | $P3m1(164)$   | $P3m1(164)$   | $P3m1(164)$   | —                  | —     | —     | 7.96           | 5.61  | 44.3  | —               | —              | —           | —            | —            | 1.716          | 3.389  | 0.0  | —                          | —   |
| RhI <sub>2</sub>  | HXX                       | —             | $P4/mmm(123)$ | $P4/mmm(123)$ | —                  | —     | —     | 8.07           | 8.07  | 60.0  | —               | —              | —           | —            | —            | 0.004          | 2.418  | 3.5  | 3.5                        | —   |
| RhAu <sub>2</sub> | HXX                       | $P4/mmm(123)$ | —             | —             | 6.61               | 9.22  | 43.2  | 7.11           | 5.87  | 50.2  | —               | —              | —           | —            | —            | 5.785          | 5.794  | —    | 0.0                        | —   |
| RhHg <sub>2</sub> | TXX                       | —             | —             | —             | 8.80               | 7.19  | 52.5  | —              | —     | —     | —               | —              | —           | —            | —            | 1.278          | 6.618  | 0.0  | —                          | —   |
| RhBi <sub>2</sub> | TPX                       | $P1(2)$       | —             | —             | 8.13               | 8.13  | 44.4  | 8.13           | 8.13  | 44.4  | —               | 7.22           | 8.79        | —            | —            | 0.006          | 1.307  | 0.0  | —                          | —   |
| PdB <sub>2</sub>  | PTH                       | $Cmnm(65)$    | $Cmnm(65)$    | $Cmnm(65)$    | —                  | —     | —     | 6.20           | 6.19  | 59.8  | —               | —              | —           | —            | —            | 0.013          | 0.016  | 0.0  | 0.0                        | —   |
| PdO <sub>2</sub>  | HTP                       | $P3m1(164)$   | $P3m1(164)$   | $P3m1(164)$   | —                  | —     | —     | 6.83           | 6.84  | 59.9  | —               | —              | —           | —            | —            | 0.004          | 0.009  | 0.0  | 0.0                        | —   |
| PdF <sub>2</sub>  | PTH                       | $P3m1(164)$   | $C2/m(12)$    | $P2_1/c(14)$  | —                  | —     | —     | 6.83           | 6.84  | 59.9  | —               | —              | —           | —            | —            | 0.177          | 0.237  | 8.0  | 3.9                        | 0.0 |
| PdAl <sub>2</sub> | HXX                       | —             | $C2/m(12)$    | $C2/m(12)$    | —                  | —     | —     | 9.07           | 9.08  | 42.3  | —               | —              | —           | —            | —            | 3.293          | 3.299  | —    | 0.0                        | —   |
| PdP <sub>2</sub>  | HTX                       | $Pc(7)$       | $Pc(7)$       | $Pc(7)$       | —                  | —     | —     | 7.14           | 7.14  | 60.0  | —               | —              | —           | —            | —            | 0.395          | 1.051  | 0.0  | 0.0                        | —   |
| PdS <sub>2</sub>  | TXX                       | $P3m1(164)$   | —             | —             | 7.48               | 7.48  | 59.9  | 8.56           | 8.54  | 47.4  | —               | —              | —           | —            | —            | 0.888          | 2.958  | 0.0  | —                          | —   |
| PdCl <sub>2</sub> | HTX                       | $P3m1(164)$   | $Cmnm(65)$    | $Cmnm(65)$    | —                  | —     | —     | 10.58          | 10.59 | 57.8  | —               | 10.26          | 10.28       | —            | —            | 0.753          | 3.561  | 8.0  | 0.0                        | —   |
| PdK <sub>2</sub>  | HPT                       | $P3m1(164)$   | $Pnmm(47)$    | $Pnmm(47)$    | —                  | —     | —     | 8.53           | 8.54  | 59.8  | —               | 8.51           | 8.52        | —            | —            | 0.480          | 0.512  | 0.0  | 0.0                        | —   |
| PdCa <sub>2</sub> | PTH                       | $P3m1(164)$   | $P3m1(164)$   | $P3m1(164)$   | —                  | —     | —     | 7.99           | 7.97  | 59.6  | —               | 7.97           | 7.95        | —            | —            | 0.006          | 1.685  | 0.0  | 0.0                        | —   |
| PdFe <sub>2</sub> | HPT                       | $P3m1(164)$   | $P6m2(187)$   | $P3m1(164)$   | —                  | —     | —     | 6.91           | 6.93  | 60.1  | —               | —              | —           | —            | —            | 0.376          | 0.382  | 0.0  | 0.0                        | —   |
| PdAs <sub>2</sub> | HXX                       | —             | $Am2(38)$     | $Am2(38)$     | —                  | —     | —     | 9.09           | 8.78  | 37.4  | —               | —              | —           | —            | —            | 2.195          | 7.320  | —    | 0.0                        | —   |
| PdS <sub>2</sub>  | TXX                       | $P3m1(164)$   | —             | —             | 7.51               | 7.51  | 59.8  | 8.63           | 8.63  | 49.7  | —               | —              | —           | —            | —            | 2.841          | 4.700  | 0.0  | —                          | —   |
| PdSe <sub>2</sub> | PHT                       | $P3m1(164)$   | $Cmnm(65)$    | $Cmnm(65)$    | —                  | —     | —     | 7.84           | 7.84  | 59.8  | —               | 15.26          | 6.63        | —            | —            | 0.020          | 0.475  | 7.9  | 0.0                        | 0.0 |
| PdBr <sub>2</sub> | PTH                       | $P3m1(164)$   | —             | —             | 10.86              | 10.89 | 58.4  | —              | —     | —     | —               | 10.62          | 10.64       | —            | —            | 0.019          | 1.091  | 0.0  | 0.0                        | —   |
| PdRb <sub>2</sub> | TXX                       | $P3m1(164)$   | —             | —             | 9.14               | 9.14  | 59.2  | —              | —     | —     | —               | —              | —           | —            | —            | 2.115          | 4.412  | 0.0  | —                          | —   |
| PdSr <sub>2</sub> | HXX                       | —             | $C2/m(12)$    | $C2/m(12)$    | —                  | —     | —     | 8.73           | 7.47  | 45.6  | —               | —              | —           | —            | —            | 0.831          | 4.247  | —    | 0.0                        | —   |
| PdZr <sub>2</sub> | PXX                       | —             | —             | —             | —                  | —     | —     | —              | —     | —     | —               | 8.34           | 8.33        | —            | —            | 3.878          | 3.891  | —    | 0.0                        | —   |
| PdRu <sub>2</sub> | HXX                       | —             | $P4/mmm(123)$ | $P4/mmm(123)$ | —                  | —     | —     | 5.83           | 8.37  | 43.3  | —               | —              | —           | —            | —            | 6.189          | 6.315  | —    | 0.0                        | —   |
| PdAg <sub>2</sub> | HXX                       | —             | $P6m2(187)$   | $P6m2(187)$   | —                  | —     | —     | 6.36           | 6.35  | 60.1  | —               | —              | —           | —            | —            | 1.708          | 1.943  | —    | 0.0                        | —   |
| PdIn <sub>2</sub> | THX                       | $C2/m(12)$    | $Am2(38)$     | $Am2(38)$     | —                  | —     | —     | 8.93           | 8.93  | 54.1  | —               | —              | —           | —            | —            | 0.077          | 5.364  | 0.0  | 0.0                        | —   |
| PdSb <sub>2</sub> | TPX                       | $P3m1(164)$   | —             | —             | 8.08               | 8.08  | 59.8  | —              | —     | —     | —               | 6.98           | 8.06        | —            | —            | 0.025          | 2.028  | 0.0  | 0.0                        | —   |
| PdTe <sub>2</sub> | THP                       | $C2/m(12)$    | $Cmnm(65)$    | $Cmnm(65)$    | —                  | —     | —     | 10.07          | 10.07 | 45.5  | —               | 14.21          | 7.29        | —            | —            | 0.153          | 0.225  | 0.0  | 0.0                        | —   |
| PdI <sub>2</sub>  | TXX                       | $P3m1(164)$   | —             | —             | 10.85              | 10.91 | 59.8  | —              | —     | —     | —               | —              | —           | —            | —            | 0.882          | 2.308  | 0.0  | —                          | —   |

(Continued on next page)





Table 1: List of stable structures

| species           | Initial structure indices | space group       |       |       | lattice parameters |       |       |                |       |       | relative energy |                | spin moment |              |              |                |        |      |                       |   |
|-------------------|---------------------------|-------------------|-------|-------|--------------------|-------|-------|----------------|-------|-------|-----------------|----------------|-------------|--------------|--------------|----------------|--------|------|-----------------------|---|
|                   |                           | T                 | H     | P     | T                  |       |       | H              |       |       | P               |                |             | $\Delta E_1$ | $\Delta E_2$ | T              | H      | P    |                       |   |
|                   |                           | a [Å]             | b [Å] | c [Å] | a [Å]              | b [Å] | c [Å] | $\gamma$ [deg] | a [Å] | b [Å] | c [Å]           | $\gamma$ [deg] | a [Å]       | b [Å]        | c [Å]        | $\gamma$ [deg] | [eV]   | [eV] | [ $\mu_B$ /unit cell] |   |
| InCa <sub>2</sub> | THX                       | $P4/mmm(123)$     | —     | —     | —                  | 7.57  | 10.75 | 44.6           | —     | —     | —               | —              | —           | —            | —            | 1.123          | 6.594  | 0.0  | —                     | — |
| InSc <sub>2</sub> | HXX                       | $P4/mmm(123)$     | —     | —     | —                  | 6.65  | 9.46  | 45.0           | —     | —     | —               | —              | —           | —            | —            | 3.680          | 6.339  | 0.0  | —                     | — |
| InTi <sub>2</sub> | TXX                       | $C2/m(12)$        | —     | —     | —                  | 10.64 | 10.63 | 31.5           | —     | —     | —               | —              | —           | —            | —            | 1.117          | 5.256  | 0.0  | —                     | — |
| InV <sub>2</sub>  | TXX                       | $C2/m(12)$        | —     | —     | —                  | 10.66 | 10.65 | 31.1           | —     | —     | —               | —              | —           | —            | —            | 3.078          | 3.226  | 0.0  | —                     | — |
| InCr <sub>2</sub> | HXX                       | $P4/mmm(123)$     | —     | —     | —                  | 6.11  | 8.63  | 45.1           | —     | —     | —               | —              | —           | —            | —            | 1.595          | 2.770  | 0.0  | —                     | — |
| InMn <sub>2</sub> | PXX                       | $P6/mmm(191)$     | —     | —     | —                  | —     | —     | —              | —     | —     | —               | —              | —           | —            | —            | 2.572          | 2.657  | —    | 35.6                  | — |
| InY <sub>2</sub>  | HXX                       | $P4/mmm(123)$     | —     | —     | —                  | 6.81  | 9.62  | 45.1           | —     | —     | —               | —              | —           | —            | —            | 2.618          | 3.690  | 0.0  | —                     | — |
| InPd <sub>2</sub> | PXX                       | $P\bar{3}m1(164)$ | —     | —     | —                  | —     | —     | —              | —     | —     | —               | —              | —           | —            | —            | 3.730          | 4.080  | —    | —                     | — |
| InIn <sub>2</sub> | HXX                       | $Amn2(38)$        | —     | —     | —                  | 9.65  | 9.57  | 37.4           | —     | —     | —               | —              | —           | —            | —            | 2.055          | 3.373  | 0.0  | —                     | — |
| InTe <sub>2</sub> | HXX                       | $C222(21)$        | —     | —     | —                  | 8.51  | 8.50  | 47.8           | —     | —     | —               | —              | —           | —            | —            | 0.068          | 0.390  | 0.0  | —                     | — |
| InBa <sub>2</sub> | HXX                       | $P4/mmm(123)$     | —     | —     | —                  | 8.51  | 12.04 | 45.1           | —     | —     | —               | —              | —           | —            | —            | 2.067          | 2.487  | 0.0  | —                     | — |
| InOs <sub>2</sub> | PXX                       | $P6/mmm(191)$     | —     | —     | —                  | 9.88  | 9.87  | 60.1           | —     | —     | —               | —              | —           | —            | —            | 0.001          | 1.107  | 0.0  | —                     | — |
| InAu <sub>2</sub> | TPX                       | $P6/mmm(191)$     | —     | —     | —                  | —     | —     | —              | —     | —     | —               | —              | —           | —            | —            | 3.251          | 4.456  | —    | —                     | — |
| InTi <sub>2</sub> | HXX                       | $P\bar{6}m2(187)$ | —     | —     | —                  | 6.94  | 6.95  | 59.9           | —     | —     | —               | —              | —           | —            | —            | 4.465          | 4.815  | 0.0  | —                     | — |
| InBe <sub>2</sub> | HXX                       | $Pma2(28)$        | —     | —     | —                  | 7.19  | 8.34  | 30.2           | —     | —     | —               | —              | —           | —            | —            | 2.221          | 2.222  | —    | —                     | — |
| SnO <sub>2</sub>  | PXX                       | —                 | —     | —     | —                  | —     | —     | —              | —     | —     | —               | —              | —           | —            | —            | 3.860          | 5.502  | —    | —                     | — |
| SnAl <sub>2</sub> | PXX                       | —                 | —     | —     | —                  | —     | —     | —              | —     | —     | —               | —              | —           | —            | —            | 1.498          | 3.010  | 0.0  | —                     | — |
| SnS <sub>2</sub>  | TXX                       | —                 | —     | —     | —                  | 7.46  | 7.46  | 60.0           | —     | —     | —               | —              | —           | —            | —            | 0.024          | 1.262  | 0.0  | —                     | — |
| SnCl <sub>2</sub> | TPX                       | $P2_1/m(11)$      | —     | —     | —                  | 8.91  | 8.91  | 57.2           | —     | —     | —               | —              | —           | —            | —            | 2.288          | 2.307  | —    | —                     | — |
| SnK <sub>2</sub>  | HXX                       | $Amn2(38)$        | —     | —     | —                  | 10.55 | 11.48 | 45.0           | —     | —     | —               | —              | —           | —            | —            | 0.018          | 0.590  | 0.0  | —                     | — |
| SnCa <sub>2</sub> | TPH                       | $P4/mmm(123)$     | —     | —     | —                  | 10.12 | 10.12 | 60.0           | —     | —     | —               | —              | —           | —            | —            | 11.665         | 12.496 | —    | —                     | — |
| SnV <sub>2</sub>  | HXX                       | $P\bar{1}(2)$     | —     | —     | —                  | 8.19  | 8.23  | 45.0           | —     | —     | —               | —              | —           | —            | —            | 0.589          | 1.785  | 34.3 | —                     | — |
| SnCr <sub>2</sub> | HXX                       | $C2/m(12)$        | —     | —     | —                  | 8.77  | 8.77  | 59.9           | —     | —     | —               | —              | —           | —            | —            | 0.806          | 1.045  | 0.0  | —                     | — |
| SnBr <sub>2</sub> | TPX                       | $Amn2(38)$        | —     | —     | —                  | 10.51 | 10.53 | 60.0           | —     | —     | —               | —              | —           | —            | —            | 2.089          | 2.099  | —    | —                     | — |
| SnRb <sub>2</sub> | HXX                       | —                 | —     | —     | —                  | —     | —     | —              | —     | —     | —               | —              | —           | —            | —            | 0.070          | 2.162  | 0.0  | —                     | — |
| SnSr <sub>2</sub> | TPX                       | $P\bar{3}m1(164)$ | —     | —     | —                  | 9.18  | 9.18  | 59.7           | —     | —     | —               | —              | —           | —            | —            | 2.673          | 3.095  | —    | —                     | — |
| SnY <sub>2</sub>  | PXX                       | —                 | —     | —     | —                  | —     | —     | —              | —     | —     | —               | —              | —           | —            | —            | 1.481          | 1.499  | —    | —                     | — |
| SnIn <sub>2</sub> | HXX                       | $Amn2(38)$        | —     | —     | —                  | 9.54  | 9.31  | 39.1           | —     | —     | —               | —              | —           | —            | —            | 0.004          | 0.937  | 0.0  | —                     | — |
| SnI <sub>2</sub>  | PTX                       | $P\bar{3}m1(164)$ | —     | —     | —                  | 10.34 | 13.50 | 39.4           | —     | —     | —               | —              | —           | —            | —            | 2.435          | 2.463  | —    | —                     | — |
| SnCs <sub>2</sub> | HXX                       | $Cnmn(65)$        | —     | —     | —                  | 10.86 | 10.91 | 59.6           | —     | —     | —               | —              | —           | —            | —            | 0.029          | 1.678  | 0.0  | —                     | — |
| SnBa <sub>2</sub> | TPX                       | $P\bar{3}m1(164)$ | —     | —     | —                  | —     | —     | —              | —     | —     | —               | —              | —           | —            | —            | 2.336          | 3.721  | —    | —                     | — |
| SnHg <sub>2</sub> | HXX                       | —                 | —     | —     | —                  | —     | —     | —              | —     | —     | —               | —              | —           | —            | —            | 0.438          | 1.695  | —    | —                     | — |
| SnPb <sub>2</sub> | PHX                       | $P2/m(10)$        | —     | —     | —                  | 9.10  | 9.50  | 41.1           | —     | —     | —               | —              | —           | —            | —            | 0.694          | 2.421  | 0.0  | —                     | — |
| SnLi <sub>2</sub> | THX                       | $P\bar{6}m2(187)$ | —     | —     | —                  | 7.58  | 7.58  | 59.7           | —     | —     | —               | —              | —           | —            | —            | 0.467          | 2.805  | 0.0  | —                     | — |
| SbS <sub>2</sub>  | TPX                       | $P\bar{3}m1(164)$ | —     | —     | —                  | 9.29  | 9.28  | 60.5           | —     | —     | —               | —              | —           | —            | —            | 0.737          | 0.960  | —    | —                     | — |
| SbK <sub>2</sub>  | HPX                       | $Pm(6)$           | —     | —     | —                  | 10.75 | 11.36 | 43.9           | —     | —     | —               | —              | —           | —            | —            | 0.075          | 1.341  | 0.0  | —                     | — |
| SbCa <sub>2</sub> | PTX                       | $C2/m(12)$        | —     | —     | —                  | 7.84  | 7.84  | 59.6           | —     | —     | —               | —              | —           | —            | —            | 4.077          | 4.090  | —    | —                     | — |
| SbV <sub>2</sub>  | HXX                       | $Pmn2_1(31)$      | —     | —     | —                  | —     | —     | —              | —     | —     | —               | —              | —           | —            | —            | 0.925          | 2.376  | 0.0  | —                     | — |
| SbSe <sub>2</sub> | TXX                       | $Pm(6)$           | —     | —     | —                  | 8.58  | 8.89  | 55.8           | —     | —     | —               | —              | —           | —            | —            | 2.203          | 2.925  | —    | —                     | — |
| SbBr <sub>2</sub> | HXX                       | $Amn2(38)$        | —     | —     | —                  | 10.78 | 11.48 | 45.7           | —     | —     | —               | —              | —           | —            | —            | 1.195          | 2.554  | —    | —                     | — |
| SbRb <sub>2</sub> | HXX                       | —                 | —     | —     | —                  | —     | —     | —              | —     | —     | —               | —              | —           | —            | —            | 0.004          | 1.210  | 0.0  | —                     | — |
| SbSr <sub>2</sub> | PTX                       | $C2/m(12)$        | —     | —     | —                  | 9.82  | 9.78  | 60.4           | —     | —     | —               | —              | —           | —            | —            | 0.833          | 1.455  | —    | —                     | — |
| SbPd <sub>2</sub> | HXX                       | $Pmn2_1(31)$      | —     | —     | —                  | —     | —     | —              | —     | —     | —               | —              | —           | —            | —            | 1.297          | 3.037  | —    | —                     | — |
| SbCd <sub>2</sub> | PXX                       | —                 | —     | —     | —                  | —     | —     | —              | —     | —     | —               | —              | —           | —            | —            | 0.937          | 3.263  | —    | —                     | — |
| SbIn <sub>2</sub> | HXX                       | $Amn2(38)$        | —     | —     | —                  | 8.33  | 8.32  | 58.5           | —     | —     | —               | —              | —           | —            | —            | 1.259          | 1.772  | 0.0  | —                     | — |
| SbTe <sub>2</sub> | TXX                       | —                 | —     | —     | —                  | —     | —     | —              | —     | —     | —               | —              | —           | —            | —            | 1.739          | 2.914  | —    | —                     | — |
| SbS <sub>2</sub>  | HXX                       | $Pm(6)$           | —     | —     | —                  | 11.27 | 11.95 | 44.4           | —     | —     | —               | —              | —           | —            | —            | 1.313          | 1.308  | —    | —                     | — |
| SbCs <sub>2</sub> | HXX                       | $Amn2(38)$        | —     | —     | —                  | 10.03 | 10.07 | 59.9           | —     | —     | —               | —              | —           | —            | —            | 0.209          | 1.189  | —    | —                     | — |
| SbBa <sub>2</sub> | TXX                       | —                 | —     | —     | —                  | —     | —     | —              | —     | —     | —               | —              | —           | —            | —            | 0.195          | 2.661  | 0.0  | —                     | — |
| SbTI <sub>2</sub> | HPX                       | $Amn2(38)$        | —     | —     | —                  | 9.16  | 9.21  | 41.9           | —     | —     | —               | —              | —           | —            | —            | 0.038          | 1.715  | 0.0  | —                     | — |
| SbBi <sub>2</sub> | PTX                       | $P1(1)$           | —     | —     | —                  | 9.17  | 9.17  | 59.3           | —     | —     | —               | —              | —           | —            | —            | 17.621         | 18.239 | —    | —                     | — |
| TeLi <sub>2</sub> | PTX                       | $P\bar{3}m1(164)$ | —     | —     | —                  | 10.19 | 10.20 | 59.5           | —     | —     | —               | —              | —           | —            | —            | 0.005          | 2.006  | 0.0  | —                     | — |
| TeB <sub>2</sub>  | PXX                       | $P2/c(13)$        | —     | —     | —                  | 7.71  | 7.71  | 59.8           | —     | —     | —               | —              | —           | —            | —            | 2.292          | 2.634  | —    | —                     | — |
| TeNa <sub>2</sub> | PTX                       | $P\bar{3}m1(164)$ | —     | —     | —                  | 11.31 | 11.33 | 58.6           | —     | —     | —               | —              | —           | —            | —            | 0.013          | 1.709  | 0.0  | —                     | — |
| TeS <sub>2</sub>  | TXX                       | $P\bar{3}m1(164)$ | —     | —     | —                  | 8.45  | 9.16  | 62.8           | —     | —     | —               | —              | —           | —            | —            | 0.767          | 0.919  | —    | —                     | — |
| TeK <sub>2</sub>  | PTX                       | $P2_1/m(164)$     | —     | —     | —                  | —     | —     | —              | —     | —     | —               | —              | —           | —            | —            | 0.0            | —      | —    | —                     | — |
| TeCa <sub>2</sub> | THX                       | $P\bar{6}m2(187)$ | —     | —     | —                  | 8.41  | 8.37  | 59.7           | —     | —     | —               | —              | —           | —            | —            | 0.0            | —      | —    | —                     | — |

(Continued on next page)

Table 1: List of stable structures

| species           | Initial structure |                   | space group |                   |       | lattice parameters |                |       |       |                |                   | relative energy   |      | spin moment |        |       |       |
|-------------------|-------------------|-------------------|-------------|-------------------|-------|--------------------|----------------|-------|-------|----------------|-------------------|-------------------|------|-------------|--------|-------|-------|
|                   | indices           | T                 | H           | P                 | T     |                    |                | H     |       |                | $\Delta E_1$ [eV] | $\Delta E_2$ [eV] | T    | H           | P      |       |       |
|                   |                   |                   |             |                   | a [Å] | b [Å]              | $\gamma$ [deg] | a [Å] | b [Å] | $\gamma$ [deg] |                   |                   |      |             |        | a [Å] | b [Å] |
| TeSe <sub>2</sub> | TPX               | $P\bar{1}(2)$     | -           | $P2_1/m(11)$      | 7.64  | 8.55               | 63.8           | -     | -     | -              | 8.62              | 7.54              | 63.9 | 0.150       | 2.466  | 0.5   | 0.0   |
| TeSe <sub>2</sub> | TXX               | $P\bar{3}m1(164)$ | -           | -                 | 7.97  | 7.97               | 59.8           | -     | -     | -              | -                 | -                 | -    | 0.931       | 2.325  | 0.0   | -     |
| TeRb <sub>2</sub> | TPX               | $P\bar{3}m1(164)$ | -           | $P3m1(164)$       | 11.86 | 11.88              | 58.1           | -     | -     | -              | 11.64             | 11.67             | 59.6 | 0.032       | 1.515  | 0.0   | 0.0   |
| TeSb <sub>2</sub> | THX               | $P\bar{3}m1(164)$ | -           | $P\bar{6}m2(187)$ | 8.91  | 8.95               | 60.3           | -     | -     | -              | 8.94              | 8.88              | 59.3 | 0.500       | 2.067  | 0.0   | 0.0   |
| TeCd <sub>2</sub> | PXX               | -                 | -           | $P2(3)$           | -     | -                  | -              | -     | -     | -              | -                 | -                 | -    | 1.789       | 1.844  | -     | 0.0   |
| TeTe <sub>2</sub> | TXX               | $P\bar{3}m1(164)$ | -           | -                 | 8.57  | 8.57               | 59.3           | -     | -     | -              | -                 | -                 | -    | 1.102       | 1.829  | 0.0   | -     |
| TeCs <sub>2</sub> | TXX               | $P\bar{3}m1(164)$ | -           | -                 | 12.04 | 12.14              | 59.4           | -     | -     | -              | -                 | -                 | -    | 1.228       | 2.144  | 0.0   | -     |
| TeTl <sub>2</sub> | HPT               | $P\bar{3}m1(164)$ | -           | $P\bar{6}m2(187)$ | 9.79  | 9.80               | 58.4           | -     | -     | -              | 9.28              | 9.32              | 58.4 | 0.032       | 0.034  | 0.0   | 0.0   |
| TePb <sub>2</sub> | PHX               | -                 | -           | $Pc(7)$           | -     | -                  | -              | -     | -     | -              | 9.27              | 13.39             | 42.8 | 0.103       | 1.349  | -     | 0.0   |
| IN <sub>2</sub>   | PXX               | -                 | -           | $P1(1)$           | -     | -                  | -              | -     | -     | -              | -                 | -                 | -    | 21.899      | 22.768 | -     | 0.0   |
| IS <sub>2</sub>   | PXX               | -                 | -           | $P1(1)$           | -     | -                  | -              | -     | -     | -              | -                 | -                 | -    | 4.600       | 5.349  | -     | 1.9   |
| ICl <sub>2</sub>  | THP               | $P\bar{1}(2)$     | -           | $P1(1)$           | 9.36  | 8.62               | 80.0           | -     | -     | -              | 7.93              | 8.97              | 75.1 | 0.112       | 0.159  | 0.0   | 0.0   |
| IK <sub>2</sub>   | TPH               | $P2_1/m(11)$      | -           | $P\bar{6}m2(187)$ | 9.84  | 9.86               | 59.0           | -     | -     | -              | 10.00             | 9.98              | 56.2 | 0.041       | 0.189  | 0.0   | 0.0   |
| ISe <sub>2</sub>  | PXX               | -                 | -           | $P1(1)$           | 9.08  | 9.40               | 76.7           | -     | -     | -              | 8.93              | 9.22              | 78.3 | 0.019       | 0.075  | 0.0   | 0.0   |
| IBr <sub>2</sub>  | TPH               | $P\bar{1}(2)$     | -           | $P1(1)$           | -     | -                  | -              | -     | -     | -              | 10.57             | 10.55             | 55.9 | 0.072       | 0.937  | -     | 0.0   |
| IRb <sub>2</sub>  | HPX               | $P\bar{3}m1(164)$ | -           | $Am2(38)$         | 8.54  | 8.55               | 59.8           | -     | -     | -              | 8.57              | 8.57              | 59.0 | 0.115       | 1.645  | 0.0   | 0.0   |
| ISr <sub>2</sub>  | PHT               | $P\bar{1}(2)$     | -           | $P\bar{6}m2(187)$ | 9.69  | 9.61               | 84.7           | -     | -     | -              | 9.73              | 9.58              | 62.4 | 0.444       | 0.501  | 0.0   | 0.0   |
| IL <sub>2</sub>   | TPX               | $P\bar{1}(2)$     | -           | $P1(1)$           | 10.99 | 10.96              | 58.9           | -     | -     | -              | 11.22             | 11.18             | 55.7 | 0.245       | 0.271  | 0.0   | 0.0   |
| ICs <sub>2</sub>  | THP               | $P\bar{3}m1(164)$ | -           | $Am2(38)$         | 10.96 | 10.42              | 61.7           | -     | -     | -              | 10.37             | 10.34             | 55.0 | 0.169       | 0.689  | 20.0  | 20.0  |
| CsN <sub>2</sub>  | TPH               | $P2/c(13)$        | -           | $Am2(38)$         | -     | -                  | -              | -     | -     | -              | 10.12             | 10.13             | 55.1 | 0.512       | 1.732  | -     | 4.0   |
| CsF <sub>2</sub>  | HPX               | -                 | -           | $P1(1)$           | 15.07 | 15.07              | 36.6           | -     | -     | -              | -                 | -                 | -    | 0.159       | 6.625  | 0.0   | 0.0   |
| CsAl <sub>2</sub> | PTX               | $Cmnm(65)$        | -           | $Cmme(67)$        | 17.01 | 16.99              | 57.9           | -     | -     | -              | -                 | -                 | -    | 0.034       | 2.466  | 0.0   | 0.0   |
| CsK <sub>2</sub>  | PTX               | $P6/mmm(191)$     | -           | $P6/mmm(191)$     | 15.19 | 15.20              | 58.9           | -     | -     | -              | 15.56             | 15.57             | 56.4 | 0.044       | 3.461  | 0.0   | 0.0   |
| CsCa <sub>2</sub> | TPX               | $P6/mmm(191)$     | -           | $Cmnm(65)$        | 14.19 | 14.18              | 46.0           | -     | -     | -              | -                 | -                 | -    | 0.016       | 3.209  | 42.2  | 42.1  |
| CsCr <sub>2</sub> | PTX               | $Cmnm(65)$        | -           | $P1(1)$           | 13.71 | 13.70              | 40.2           | -     | -     | -              | 9.84              | 13.95             | 45.2 | 0.598       | 1.834  | 0.0   | 0.0   |
| CsSe <sub>2</sub> | TPX               | $C2/m(12)$        | -           | $P1(1)$           | 17.64 | 17.65              | 59.0           | -     | -     | -              | -                 | -                 | -    | 0.919       | 1.134  | 4.0   | -     |
| CsBr <sub>2</sub> | TXX               | $P4/mmm(123)$     | -           | -                 | 16.14 | 16.13              | 59.2           | -     | -     | -              | 17.85             | 17.84             | 58.6 | 0.012       | 2.173  | 0.0   | 0.0   |
| CsRb <sub>2</sub> | TPX               | $P6/mmm(191)$     | -           | $P6/mmm(191)$     | 16.14 | 16.13              | 59.2           | -     | -     | -              | 16.59             | 16.57             | 56.7 | 0.069       | 3.214  | 0.0   | 0.0   |
| CsSr <sub>2</sub> | TPX               | $P6/mmm(191)$     | -           | $Cmnm(65)$        | 15.79 | 15.78              | 43.4           | -     | -     | -              | 15.56             | 15.55             | 45.8 | 0.040       | 4.966  | 14.0  | 13.4  |
| CsY <sub>2</sub>  | PTX               | $C2/m(12)$        | -           | $Cmnm(65)$        | 14.23 | 14.22              | 44.8           | -     | -     | -              | 14.23             | 14.25             | 44.8 | 0.028       | 3.849  | 0.0   | 0.0   |
| CsAg <sub>2</sub> | PTX               | $Cmnm(65)$        | -           | $Cmnm(65)$        | 15.03 | 15.01              | 41.2           | -     | -     | -              | 13.63             | 12.06             | 43.9 | 0.504       | 0.543  | 0.0   | 0.0   |
| CsIn <sub>2</sub> | HTP               | $C2/m(12)$        | -           | $P1(1)$           | 14.54 | 14.54              | 41.5           | -     | -     | -              | 14.33             | 14.36             | 45.4 | 0.384       | 1.809  | 0.0   | 0.0   |
| CsTe <sub>2</sub> | TPX               | $C2/m(12)$        | -           | $Cmnm(65)$        | 10.42 | 10.42              | 44.9           | -     | -     | -              | 13.76             | 15.04             | 61.7 | 0.796       | 1.746  | 4.0   | -     |
| CsI <sub>2</sub>  | PTX               | $P4/mmm(123)$     | -           | -                 | 18.62 | 18.63              | 58.2           | -     | -     | -              | 18.82             | 18.97             | 58.7 | 0.027       | 2.081  | 0.0   | 0.0   |
| CsCs <sub>2</sub> | PTX               | $P\bar{3}m1(164)$ | -           | $P6/mmm(191)$     | 13.95 | 13.95              | 45.0           | -     | -     | -              | 13.95             | 13.96             | 45.0 | 0.002       | 4.896  | 0.0   | 0.0   |
| CsAu <sub>2</sub> | PTX               | $Cmnm(65)$        | -           | $Cmnm(65)$        | 15.60 | 15.58              | 41.9           | -     | -     | -              | 15.61             | 15.60             | 41.8 | 0.041       | 4.172  | 0.0   | 0.0   |
| CsTi <sub>2</sub> | TPX               | $C2/m(12)$        | -           | $P2_1/m(11)$      | 15.50 | 15.51              | 37.4           | -     | -     | -              | 15.45             | 15.45             | 38.3 | 0.152       | 4.817  | 0.0   | 0.0   |
| CsPb <sub>2</sub> | TPX               | $P\bar{1}(2)$     | -           | $Cmnm(65)$        | 15.08 | 15.10              | 35.0           | -     | -     | -              | -                 | -                 | -    | 1.192       | 4.126  | 0.0   | -     |
| CsBi <sub>2</sub> | TXX               | $C2/m(12)$        | -           | $Pmna(51)$        | -     | -                  | -              | -     | -     | -              | 8.97              | 10.87             | 34.1 | 2.298       | 16.736 | -     | 0.0   |
| BaB <sub>2</sub>  | PXX               | -                 | -           | $Pmna(51)$        | -     | -                  | -              | -     | -     | -              | 8.72              | 11.72             | 47.6 | 24.445      | 34.444 | -     | 0.0   |
| BaC <sub>2</sub>  | PXX               | -                 | -           | $Pmnm(59)$        | -     | -                  | -              | -     | -     | -              | 9.18              | 9.23              | 60.7 | 19.750      | 19.780 | -     | 3.8   |
| BaN <sub>2</sub>  | HXX               | -                 | -           | $P\bar{6}m2(187)$ | 8.52  | 8.53               | 59.3           | -     | -     | -              | -                 | -                 | -    | 0.025       | 2.175  | 0.0   | 0.0   |
| BaF <sub>2</sub>  | TPX               | $P\bar{3}m1(164)$ | -           | $Pmnm(59)$        | -     | -                  | -              | -     | -     | -              | 8.09              | 8.53              | 58.4 | 1.492       | 9.809  | -     | 0.0   |
| BaAl <sub>2</sub> | PXX               | -                 | -           | $Cm2(35)$         | 12.20 | 12.21              | 37.3           | -     | -     | -              | -                 | -                 | -    | 0.017       | 5.115  | 0.0   | 0.0   |
| BaS <sub>2</sub>  | PTX               | $P2/c(13)$        | -           | $P2/c(13)$        | 11.20 | 10.66              | 34.9           | -     | -     | -              | 10.15             | 10.14             | 60.1 | 1.981       | 3.218  | 0.0   | 0.0   |
| BaP <sub>2</sub>  | TXX               | $P\bar{1}(2)$     | -           | $P\bar{6}m2(187)$ | -     | -                  | -              | -     | -     | -              | -                 | -                 | -    | 1.981       | 3.218  | 0.0   | 0.0   |
| BaS <sub>2</sub>  | PHX               | $P\bar{3}m1(164)$ | -           | $P4/mmm(123)$     | 9.70  | 9.73               | 59.5           | -     | -     | -              | 9.65              | 9.65              | 53.2 | 0.814       | 8.564  | 0.0   | 0.0   |
| BaCl <sub>2</sub> | TPX               | -                 | -           | $Pmnm(59)$        | -     | -                  | -              | -     | -     | -              | 9.55              | 9.31              | 59.0 | 0.213       | 1.705  | 0.0   | 0.0   |
| BaK <sub>2</sub>  | HXX               | -                 | -           | $Cmnm(65)$        | -     | -                  | -              | -     | -     | -              | 15.14             | 8.97              | 32.4 | 5.288       | 5.295  | -     | 0.0   |
| BaCa <sub>2</sub> | HXX               | -                 | -           | $Am2(38)$         | -     | -                  | -              | -     | -     | -              | 13.20             | 13.23             | 34.5 | 1.951       | 1.981  | -     | 0.0   |
| BaCr <sub>2</sub> | PTH               | $Cmnm(65)$        | -           | $Pmnm(47)$        | 12.36 | 12.35              | 51.8           | -     | -     | -              | 12.37             | 12.37             | 51.7 | 0.012       | 0.318  | 40.8  | 40.8  |
| BaGe <sub>2</sub> | TPX               | $P\bar{1}(2)$     | -           | $Pmnm(47)$        | 12.23 | 12.08              | 38.8           | -     | -     | -              | 10.35             | 12.66             | 34.6 | 0.066       | 4.080  | 0.0   | 0.0   |
| BaSe <sub>2</sub> | PTX               | $P4/mmm(123)$     | -           | $P4/mmm(123)$     | 8.90  | 12.61              | 45.0           | -     | -     | -              | -                 | -                 | -    | 0.022       | 0.868  | 0.0   | 0.0   |
| BaBr <sub>2</sub> | PTX               | $P3m1(164)$       | -           | $P3m1(164)$       | 10.03 | 10.02              | 59.4           | -     | -     | -              | 9.25              | 11.07             | 52.8 | 0.009       | 1.318  | 0.0   | 0.0   |
| BaRb <sub>2</sub> | HXX               | -                 | -           | $Cmnm(65)$        | -     | -                  | -              | -     | -     | -              | 13.70             | 13.69             | 35.6 | 4.754       | 4.775  | -     | 0.0   |
| BaSr <sub>2</sub> | HXX               | -                 | -           | $Am2(38)$         | -     | -                  | -              | -     | -     | -              | 14.17             | 14.16             | 30.4 | 1.993       | 2.024  | -     | 0.0   |
| BaY <sub>2</sub>  | TXX               | $C2/m(12)$        | -           | $Am2(38)$         | 14.17 | 14.16              | 30.4           | -     | -     | -              | -                 | -                 | -    | 4.497       | 11.981 | 0.0   | -     |

(Continued on next page)

Table 1: List of stable structures

| species           | Initial structure |                              |                                 | space group                  |       |       | lattice parameters |       |       |                |       |       | relative energy |                   |                   | spin moment                |     |     |
|-------------------|-------------------|------------------------------|---------------------------------|------------------------------|-------|-------|--------------------|-------|-------|----------------|-------|-------|-----------------|-------------------|-------------------|----------------------------|-----|-----|
|                   | indices           | T                            | H                               | P                            | T     |       |                    | H     |       |                | P     |       |                 | $\Delta E_1$ [eV] | $\Delta E_2$ [eV] | $[\mu_B/\text{unit cell}]$ |     |     |
|                   |                   |                              |                                 |                              | a [Å] | b [Å] | $\gamma$ [deg]     | a [Å] | b [Å] | $\gamma$ [deg] | a [Å] | b [Å] | $\gamma$ [deg]  |                   |                   | T                          | H   | P   |
| BaPd <sub>2</sub> | TPX               | <i>C2/m</i> (12)             | —                               | <i>Cmcm</i> (65)             | 11.56 | 11.56 | 46.8               | —     | —     | —              | 11.61 | 11.62 | 48.4            | 0.173             | 1.447             | 0.0                        | —   | 0.0 |
| BaAg <sub>2</sub> | HXX               | —                            | <i>Pmma</i> (51)                | —                            | —     | —     | 6.90               | 9.76  | 44.1  | —              | —     | —     | —               | 4.854             | 4.883             | —                          | 0.0 | 0.0 |
| BaSn <sub>2</sub> | HXX               | —                            | <i>Pc</i> (7)                   | —                            | —     | —     | 8.68               | 9.40  | 75.0  | —              | —     | —     | —               | 1.507             | 1.720             | —                          | 0.0 | 0.0 |
| BaSb <sub>2</sub> | HXX               | —                            | <i>Cmcm</i> (65)                | —                            | —     | —     | 10.96              | 13.78 | 34.8  | —              | —     | —     | —               | 2.519             | 4.322             | —                          | 0.0 | 0.0 |
| BaTe <sub>2</sub> | TPX               | <i>P4/mmm</i> (123)          | —                               | <i>P4/mmm</i> (123)          | 9.43  | 13.37 | 44.8               | —     | —     | —              | 9.43  | 13.37 | 44.8            | 0.004             | 1.146             | 0.0                        | 0.0 | 0.0 |
| Ba <sub>2</sub>   | PTX               | <i>P3m1</i> (164)            | —                               | <i>P3m1</i> (164)            | 10.50 | 10.51 | 59.1               | —     | —     | —              | 10.35 | 10.34 | 59.8            | 0.012             | 0.973             | 0.0                        | 0.0 | 0.0 |
| BaCa <sub>2</sub> | HXX               | —                            | <i>Amn</i> 2(38)                | —                            | —     | —     | 15.57              | 15.52 | 35.9  | —              | —     | —     | —               | 1.937             | 2.001             | —                          | 0.0 | 0.0 |
| BaBa <sub>2</sub> | HXX               | —                            | <i>Amn</i> 2(38)                | —                            | —     | —     | 14.13              | 14.12 | 34.9  | —              | —     | —     | —               | 2.303             | 2.377             | —                          | 0.0 | 0.0 |
| BaAu <sub>2</sub> | TPX               | —                            | <i>Pmmn</i> 2 <sub>1</sub> (31) | —                            | —     | —     | 9.83               | 8.33  | 54.0  | —              | —     | —     | —               | 1.867             | 1.871             | —                          | 0.0 | 0.0 |
| BaPb <sub>2</sub> | TPX               | <i>C2/m</i> (12)             | —                               | <i>Cmcm</i> (65)             | 13.51 | 13.52 | 42.2               | —     | —     | —              | 13.58 | 13.58 | 44.3            | 0.021             | 4.013             | 0.0                        | 0.0 | 0.0 |
| BaBi <sub>2</sub> | HXX               | —                            | <i>Pmma</i> (51)                | —                            | —     | —     | 13.57              | 11.01 | 34.7  | —              | —     | —     | —               | 1.568             | 3.780             | —                          | 0.0 | 0.0 |
| HfBe <sub>2</sub> | PHX               | —                            | <i>P4/mmm</i> (123)             | —                            | —     | —     | 8.00               | 5.79  | 43.7  | —              | —     | —     | —               | 0.718             | 3.790             | —                          | 0.0 | 0.0 |
| HfB <sub>2</sub>  | PTX               | <i>P2/c</i> (13)             | —                               | <i>Cmcm</i> 2(35)            | 8.80  | 8.82  | 40.6               | —     | —     | —              | 6.93  | 7.58  | 46.5            | 0.008             | 2.755             | 0.0                        | 0.0 | 0.0 |
| HfC <sub>2</sub>  | PXX               | —                            | —                               | <i>Pmnm</i> (59)             | —     | —     | —                  | —     | —     | —              | 7.56  | 6.48  | 54.2            | 4.052             | 8.259             | —                          | 0.0 | 0.0 |
| HfN <sub>2</sub>  | HXX               | —                            | <i>Pmm</i> 2 <sub>1</sub> (31)  | —                            | —     | —     | 6.81               | 6.88  | 59.9  | —              | —     | —     | —               | 1.434             | 6.335             | —                          | 0.0 | 0.0 |
| HfO <sub>2</sub>  | HXX               | —                            | <i>Pmnm</i> (59)                | —                            | —     | —     | 5.09               | 6.52  | 50.2  | —              | —     | —     | —               | 1.359             | 1.371             | —                          | 0.0 | 0.0 |
| HfF <sub>2</sub>  | HTP               | <i>P2<sub>1</sub>/m</i> (11) | —                               | <i>Pm</i> (6)                | 6.99  | 6.98  | 50.7               | —     | —     | —              | 5.97  | 7.04  | 64.7            | 0.463             | 0.726             | 0.0                        | 0.0 | 0.0 |
| HfSi <sub>2</sub> | PHX               | —                            | <i>Pmma</i> (51)                | —                            | —     | —     | 7.33               | 9.57  | 40.0  | —              | —     | —     | —               | 0.002             | 6.863             | —                          | 0.0 | 0.0 |
| HfP <sub>2</sub>  | THX               | <i>P1</i> (2)                | —                               | <i>P6m</i> 2(187)            | 8.16  | 7.93  | 48.6               | —     | —     | —              | 8.03  | 8.02  | 59.5            | 1.106             | 1.575             | 0.0                        | 0.0 | 0.0 |
| HfS <sub>2</sub>  | TXX               | <i>P3m1</i> (164)            | —                               | —                            | 7.30  | 7.29  | 59.8               | —     | —     | —              | —     | —     | —               | 1.150             | 2.406             | 0.0                        | 0.0 | 0.0 |
| HfCl <sub>2</sub> | HTP               | <i>P2<sub>1</sub>/m</i> (11) | —                               | <i>P6m</i> 2(187)            | 6.57  | 6.98  | 61.8               | —     | —     | —              | 6.69  | 6.69  | 60.2            | 0.536             | 0.536             | 0.0                        | 0.0 | 0.0 |
| HfCa <sub>2</sub> | THX               | <i>P4/mmm</i> (123)          | —                               | <i>P4/mmm</i> (123)          | 9.97  | 7.05  | 45.0               | —     | —     | —              | 7.08  | 9.99  | 44.8            | 0.011             | 13.950            | 0.0                        | 0.0 | 0.0 |
| HfV <sub>2</sub>  | THX               | <i>Cmme</i> (67)             | —                               | <i>Cmme</i> (67)             | 10.52 | 9.63  | 23.2               | —     | —     | —              | 9.62  | 10.50 | 23.3            | 0.008             | 14.503            | 0.0                        | 0.0 | 0.0 |
| HfGe <sub>2</sub> | PXX               | —                            | —                               | <i>Pmma</i> (51)             | —     | —     | —                  | —     | —     | —              | —     | —     | —               | 0.955             | 0.956             | —                          | 0.0 | 0.0 |
| HfSe <sub>2</sub> | PTX               | <i>P3m1</i> (164)            | —                               | —                            | 7.49  | 7.48  | 60.0               | —     | —     | —              | —     | —     | —               | 0.001             | 1.854             | 0.0                        | 0.0 | 0.0 |
| HfB <sub>2</sub>  | TPH               | <i>P2<sub>1</sub>/m</i> (11) | —                               | <i>P6m</i> 2(187)            | 6.88  | 7.28  | 61.8               | —     | —     | —              | 6.99  | 6.99  | 60.1            | 0.001             | 0.039             | 0.0                        | 0.0 | 0.0 |
| HfY <sub>2</sub>  | THX               | <i>P4/mmm</i> (123)          | —                               | <i>P4/mmm</i> (123)          | 10.14 | 7.15  | 44.6               | —     | —     | —              | 9.39  | 6.75  | 45.8            | 0.502             | 5.011             | 0.0                        | 2.5 | 0.0 |
| HfTe <sub>2</sub> | TPX               | <i>P3m1</i> (164)            | —                               | —                            | 7.91  | 7.91  | 60.0               | —     | —     | —              | 7.90  | 7.90  | 60.0            | 0.005             | 1.351             | 0.0                        | 0.0 | 0.0 |
| HfI <sub>2</sub>  | PTH               | <i>C2/m</i> (12)             | —                               | <i>P6m</i> 2(187)            | 7.59  | 7.84  | 59.7               | —     | —     | —              | 7.56  | 7.56  | 59.8            | 0.231             | 0.516             | 0.0                        | 0.0 | 0.0 |
| HfAu <sub>2</sub> | THX               | <i>C2/m</i> (12)             | —                               | <i>P6m</i> 2(187)            | 7.35  | 6.29  | 50.1               | —     | —     | —              | 6.18  | 6.19  | 60.1            | 0.297             | 7.760             | 0.0                        | 0.0 | 0.0 |
| HfTi <sub>2</sub> | THX               | <i>P4/mmm</i> (123)          | —                               | <i>P4/mmm</i> (123)          | 9.49  | 6.71  | 44.9               | —     | —     | —              | 6.72  | 9.51  | 44.9            | 0.018             | 9.804             | 0.0                        | 0.0 | 0.0 |
| HfPb <sub>2</sub> | PXX               | —                            | —                               | <i>Pmnm</i> (47)             | —     | —     | —                  | —     | —     | —              | 9.16  | 11.20 | 34.3            | 0.916             | 3.420             | —                          | 0.0 | 0.0 |
| HfBi <sub>2</sub> | TXX               | <i>Cmcm</i> (65)             | —                               | —                            | 8.41  | 6.60  | 50.4               | —     | —     | —              | —     | —     | —               | 2.365             | 4.070             | 0.0                        | 0.0 | 0.0 |
| TaBe <sub>2</sub> | THX               | <i>Pmm</i> 2(25)             | —                               | <i>P4/mmm</i> (123)          | 8.54  | 9.17  | 21.4               | —     | —     | —              | 5.47  | 7.80  | 44.5            | 0.199             | 5.207             | 0.0                        | 0.0 | 0.0 |
| TaC <sub>2</sub>  | PXX               | —                            | —                               | —                            | —     | —     | —                  | —     | —     | —              | —     | —     | —               | 4.651             | 10.043            | —                          | 0.0 | 0.0 |
| TaN <sub>2</sub>  | TXX               | <i>P3m1</i> (164)            | —                               | —                            | 6.32  | 6.32  | 60.0               | —     | —     | —              | —     | —     | —               | 1.284             | 5.132             | 3.7                        | —   | —   |
| TaO <sub>2</sub>  | TPH               | <i>C2/m</i> (12)             | —                               | <i>P6m</i> 2(187)            | 6.14  | 6.13  | 60.0               | —     | —     | —              | 5.95  | 5.92  | 60.4            | 0.239             | 0.595             | 0.0                        | 0.0 | 0.0 |
| TaF <sub>2</sub>  | HXX               | —                            | <i>Pmnm</i> (59)                | —                            | —     | —     | 6.09               | 6.11  | 52.2  | —              | —     | —     | —               | 4.641             | 8.674             | —                          | 0.0 | 0.0 |
| TaP <sub>2</sub>  | TXX               | —                            | —                               | —                            | 7.30  | 7.71  | 50.3               | —     | —     | —              | —     | —     | —               | 1.257             | 11.721            | 0.0                        | 0.0 | 0.0 |
| TaS <sub>2</sub>  | HTP               | <i>P1</i> (2)                | —                               | <i>P6m</i> 2(187)            | 6.76  | 6.76  | 60.1               | —     | —     | —              | 6.68  | 6.68  | 60.0            | 0.242             | 0.728             | 0.0                        | 0.0 | 0.0 |
| TaAs <sub>2</sub> | TPX               | <i>P2<sub>1</sub>/m</i> (11) | —                               | —                            | 7.58  | 7.59  | 51.6               | —     | —     | —              | 7.68  | 6.65  | 63.8            | 0.173             | 1.714             | 0.0                        | 0.0 | 0.0 |
| TaSe <sub>2</sub> | HPT               | <i>P3m1</i> (164)            | —                               | <i>P6m</i> 2(187)            | 7.00  | 7.00  | 59.8               | —     | —     | —              | 6.94  | 6.94  | 60.0            | 0.282             | 0.284             | 0.0                        | 0.0 | 0.0 |
| TaY <sub>2</sub>  | HXX               | —                            | <i>P4/mmm</i> (123)             | —                            | —     | —     | 6.98               | 9.88  | 44.9  | —              | —     | —     | —               | 0.849             | 4.248             | —                          | 0.0 | 0.0 |
| TaIn <sub>2</sub> | PXX               | —                            | —                               | <i>C2/m</i> (12)             | —     | —     | —                  | —     | —     | —              | 6.69  | 6.07  | 45.2            | 2.749             | 2.836             | —                          | 0.0 | 0.0 |
| TaTe <sub>2</sub> | PTH               | <i>P2<sub>1</sub>/m</i> (11) | —                               | <i>P6m</i> 2(187)            | 7.50  | 7.50  | 54.7               | —     | —     | —              | 7.44  | 7.43  | 59.9            | 0.111             | 0.115             | 0.0                        | 0.0 | 0.0 |
| TaAl <sub>2</sub> | HXX               | <i>P1</i> (2)                | —                               | <i>Cm</i> (8)                | 7.63  | 7.43  | 61.3               | —     | —     | —              | 7.81  | 7.79  | 60.1            | 0.119             | 5.416             | 0.0                        | 0.0 | 0.0 |
| TaBi <sub>2</sub> | TPX               | <i>C2/m</i> (12)             | —                               | —                            | 7.10  | 7.11  | 53.7               | —     | —     | —              | 5.20  | 8.09  | 38.9            | 0.322             | 5.303             | 0.0                        | 0.0 | 0.0 |
| WB <sub>2</sub>   | THX               | <i>Pm</i> (6)                | —                               | <i>Cmnm</i> (65)             | 7.49  | 8.17  | 23.4               | —     | —     | —              | 6.08  | 7.90  | 39.7            | 0.512             | 3.976             | 0.0                        | 0.0 | 0.0 |
| WB <sub>2</sub>   | HXX               | —                            | <i>Pmma</i> (51)                | —                            | —     | —     | 6.08               | 7.90  | 39.7  | —              | —     | —     | —               | 2.009             | 2.281             | —                          | 0.0 | 0.0 |
| WN <sub>2</sub>   | TXX               | <i>P3</i> (143)              | —                               | —                            | 6.22  | 6.22  | 60.1               | —     | —     | —              | 5.70  | 5.70  | 60.0            | 2.445             | 3.081             | 0.0                        | 0.0 | 0.0 |
| WO <sub>2</sub>   | HXX               | —                            | <i>P6m</i> 2(187)               | —                            | —     | —     | 5.70               | 5.70  | 60.0  | —              | —     | —     | —               | 2.620             | 2.722             | —                          | 0.0 | 0.0 |
| WAl <sub>2</sub>  | THX               | <i>Pmnm</i> (47)             | —                               | <i>Pmnm</i> (47)             | 9.22  | 7.38  | 36.8               | —     | —     | —              | 7.90  | 7.90  | 40.9            | 0.033             | 10.429            | 0.0                        | 0.0 | 0.0 |
| WP <sub>2</sub>   | PXX               | —                            | —                               | <i>P2<sub>1</sub>/m</i> (11) | —     | —     | —                  | —     | —     | —              | 7.13  | 6.50  | 62.8            | 1.196             | 3.803             | —                          | 0.0 | 0.0 |
| WS <sub>2</sub>   | HXX               | —                            | <i>P6m</i> 2(187)               | —                            | —     | —     | 6.40               | 6.40  | 60.0  | —              | —     | —     | —               | 2.345             | 4.115             | —                          | 0.0 | 0.0 |
| WCl <sub>2</sub>  | HXX               | —                            | <i>P2/m</i> (10)                | —                            | —     | —     | 8.60               | 7.59  | 46.7  | —              | —     | —     | —               | 10.252            | 10.470            | —                          | 0.0 | 0.0 |
| WAs <sub>2</sub>  | HXX               | —                            | <i>P6m</i> 2(187)               | —                            | —     | —     | 7.39               | 7.43  | 60.2  | —              | —     | —     | —               | 2.084             | 10.262            | —                          | 0.0 | 0.0 |
| WSe <sub>2</sub>  | HXX               | —                            | <i>P6m</i> 2(187)               | —                            | —     | —     | 6.66               | 6.66  | 59.9  | —              | —     | —     | —               | 1.257             | 1.281             | —                          | 0.0 | 0.0 |

(Continued on next page)

Table 1: List of stable structures

| species           | initial structure indices | space group   |               |               | lattice parameters |       |       |                |       |       | relative energy |                |                   | spin moment       |      |      |     |
|-------------------|---------------------------|---------------|---------------|---------------|--------------------|-------|-------|----------------|-------|-------|-----------------|----------------|-------------------|-------------------|------|------|-----|
|                   |                           | T             | H             | P             | a [Å]              | b [Å] | c [Å] | $\gamma$ [deg] | a [Å] | b [Å] | c [Å]           | $\gamma$ [deg] | $\Delta E_1$ [eV] | $\Delta E_2$ [eV] | T    | H    | P   |
|                   |                           |               |               |               |                    |       |       |                |       |       |                 |                |                   |                   |      |      |     |
| WBr <sub>2</sub>  | HTP                       | $C2/m(12)$    | $Cmmm(65)$    | $C2/m(12)$    | 9.46               | 9.46  | 47.9  | 53.1           | 8.60  | 8.57  | 74.5            | 0.039          | 0.356             | 15.9              | 15.9 | 15.9 | 0.0 |
| WSr <sub>2</sub>  | HPT                       | $P2_1/m(11)$  | $P1(2)$       | $P2_1/m(11)$  | 8.17               | 7.80  | 58.5  | 53.0           | 7.99  | 9.00  | 58.2            | 0.192          | 0.208             | 0.0               | 0.0  | 0.0  | 0.0 |
| WNB <sub>2</sub>  | HXX                       | —             | $P1(2)$       | —             | —                  | —     | —     | 41.9           | 6.80  | 8.14  | —               | 1.420          | 1.877             | —                 | —    | —    | —   |
| WSn <sub>2</sub>  | HXX                       | —             | $P1(2)$       | —             | —                  | —     | 40.7  | —              | 6.14  | 9.01  | —               | 5.083          | 15.239            | —                 | —    | —    | —   |
| WSe <sub>2</sub>  | TPX                       | $P1(2)$       | —             | $P1(2)$       | 7.99               | 7.13  | 46.8  | —              | 7.99  | 7.18  | 63.7            | 0.049          | 4.571             | 0.0               | 0.0  | 0.0  | 0.0 |
| WTe <sub>2</sub>  | TPH                       | $P2_1/m(11)$  | $P6mm2(187)$  | $P2_1/m(11)$  | 7.05               | 7.27  | 61.0  | 60.0           | 7.18  | 7.18  | 61.0            | 0.004          | 0.473             | 0.0               | 0.0  | 0.0  | 0.0 |
| WI <sub>2</sub>   | HXX                       | —             | $P1(2)$       | —             | —                  | —     | 35.6  | —              | 11.12 | 10.24 | —               | 7.959          | 9.436             | —                 | —    | —    | —   |
| WTa <sub>2</sub>  | HPT                       | $C2/m(12)$    | $P1(2)$       | $C2/m(12)$    | 9.13               | 8.16  | 32.9  | 38.0           | 8.94  | 10.25 | 59.2            | 0.614          | 0.738             | 0.0               | 0.0  | 0.0  | 0.0 |
| ReB <sub>2</sub>  | THP                       | $P2/c(13)$    | $Pmmm(51)$    | $P2/c(13)$    | 7.83               | 6.85  | 44.1  | 59.6           | 5.75  | 5.83  | 42.0            | 0.213          | 0.278             | 0.0               | 0.0  | 4.3  | 0.0 |
| ReN <sub>2</sub>  | THX                       | $P1(1)$       | $P6mm2(187)$  | $P1(1)$       | 6.36               | 6.10  | 57.8  | 60.1           | 5.76  | 5.77  | —               | 0.018          | 1.863             | 0.0               | 0.0  | —    | —   |
| ReO <sub>2</sub>  | TPX                       | $P1(2)$       | —             | $P1(2)$       | 5.70               | 5.78  | 60.1  | —              | 5.78  | 5.74  | 59.3            | 0.013          | 3.965             | 0.0               | 0.0  | —    | —   |
| ReSi <sub>2</sub> | TXX                       | $C2/m(12)$    | —             | $C2/m(12)$    | 8.56               | 8.56  | 40.3  | —              | —     | —     | —               | 0.861          | 1.573             | 0.0               | —    | —    | —   |
| ReS <sub>2</sub>  | PTX                       | $P1(2)$       | —             | $P1(2)$       | 6.60               | 6.54  | 58.7  | —              | 6.48  | 9.17  | 45.0            | 0.004          | 2.516             | 0.0               | 0.0  | —    | —   |
| ReSe <sub>2</sub> | PHT                       | $P4/mmm(123)$ | $P4/mmm(123)$ | $P4/mmm(123)$ | 6.49               | 9.16  | 45.0  | 45.0           | 6.12  | 8.66  | —               | 2.452          | 3.638             | —                 | 0.0  | —    | —   |
| ReTe <sub>2</sub> | HXX                       | —             | $P4/mmm(123)$ | —             | —                  | —     | —     | —              | —     | —     | —               | 0.001          | 0.001             | 0.0               | 0.0  | 0.0  | 0.0 |
| ReTe <sub>2</sub> | TPX                       | $C2/m(12)$    | —             | $P1(2)$       | 6.86               | 6.67  | 60.3  | —              | —     | —     | 60.2            | 0.093          | 2.313             | 0.0               | —    | —    | —   |
| ReTe <sub>2</sub> | TPX                       | $P1(2)$       | —             | $P1(2)$       | 7.13               | 7.31  | 60.4  | —              | —     | —     | 58.6            | 0.007          | 1.876             | 0.0               | —    | —    | —   |
| ReCs <sub>2</sub> | TXX                       | $C2/m(12)$    | —             | $C2/m(12)$    | 10.91              | 11.87 | 45.3  | —              | —     | —     | —               | 10.951         | 11.154            | 6.0               | —    | —    | —   |
| ReBi <sub>2</sub> | TPX                       | $P2_1/m(11)$  | —             | $P1(2)$       | 7.38               | 7.37  | 54.4  | —              | —     | —     | 54.2            | 0.382          | 1.551             | 0.0               | —    | —    | —   |
| OsBe <sub>2</sub> | HXX                       | —             | $P4/mmm(123)$ | —             | —                  | —     | —     | —              | 5.72  | 8.07  | —               | 2.085          | 7.582             | —                 | 0.0  | —    | —   |
| OsB <sub>2</sub>  | PXX                       | —             | —             | $P2/c(13)$    | —                  | —     | —     | —              | —     | —     | 40.5            | 1.783          | 5.686             | —                 | —    | —    | —   |
| OsN <sub>2</sub>  | THX                       | $P1(1)$       | $P6mm2(187)$  | $P1(1)$       | 6.17               | 6.49  | 58.1  | —              | 5.65  | 5.64  | 59.8            | 0.049          | 0.888             | 0.0               | 0.0  | —    | —   |
| OsF <sub>2</sub>  | HXX                       | —             | $P2/c(13)$    | —             | 5.38               | 6.86  | 48.1  | —              | 9.01  | 6.25  | —               | 2.329          | 12.030            | —                 | —    | —    | —   |
| OsMg <sub>2</sub> | HXX                       | —             | $Amm2(38)$    | —             | —                  | —     | —     | —              | —     | —     | —               | 1.045          | 12.251            | —                 | —    | —    | —   |
| OsS <sub>2</sub>  | PXX                       | —             | —             | —             | —                  | —     | —     | —              | —     | —     | —               | —              | —                 | —                 | —    | —    | —   |
| OsS <sub>2</sub>  | TPX                       | $P2_1/m(11)$  | —             | $P2_1/m(11)$  | 6.63               | 7.11  | 57.6  | —              | —     | —     | 64.7            | 2.880          | 3.261             | —                 | —    | —    | —   |
| OsS <sub>2</sub>  | HXX                       | —             | $P4/mmm(123)$ | —             | —                  | —     | —     | —              | 9.06  | 6.40  | 45.0            | 0.005          | 3.611             | 0.0               | —    | —    | —   |
| OsTi <sub>2</sub> | HPX                       | —             | $P4/mmm(123)$ | $P4/mmm(123)$ | —                  | —     | —     | —              | 5.96  | 8.44  | 44.7            | 1.942          | 5.550             | —                 | —    | —    | —   |
| OsV <sub>2</sub>  | HXX                       | —             | $P2/c(13)$    | —             | —                  | —     | —     | —              | 9.15  | 7.17  | 36.0            | 1.739          | 6.933             | —                 | —    | —    | —   |
| OsMn <sub>2</sub> | HXX                       | —             | $P4/mmm(123)$ | —             | —                  | —     | —     | —              | 8.30  | 5.87  | 45.0            | 1.335          | 12.451            | —                 | —    | —    | —   |
| OsSe <sub>2</sub> | TPX                       | $P2_1/m(11)$  | —             | $P2_1/m(11)$  | 6.87               | 7.37  | 57.6  | —              | —     | —     | 57.6            | 0.005          | 3.117             | 0.0               | —    | —    | —   |
| OsBr <sub>2</sub> | HTX                       | $P3m1(164)$   | $Cm(8)$       | $P3m1(164)$   | 7.70               | 7.70  | 60.0  | 55.5           | 7.15  | 7.16  | 55.5            | 0.714          | 5.472             | 0.0               | 0.0  | —    | —   |
| OsZr <sub>2</sub> | TPH                       | $P1(2)$       | $P6mm2(187)$  | $P1(2)$       | 8.12               | 8.43  | 49.5  | 61.1           | 7.09  | 7.13  | 43.7            | 0.125          | 0.816             | 0.0               | 0.0  | —    | —   |
| OsNb <sub>2</sub> | HTX                       | $C2/m(12)$    | $Pmmm(47)$    | $C2/m(12)$    | 7.99               | 8.64  | 46.1  | 37.6           | 9.59  | 7.60  | —               | 0.293          | 2.822             | 0.0               | 0.0  | —    | —   |
| OsSb <sub>2</sub> | TPX                       | $P1(2)$       | —             | $P1(2)$       | 7.32               | 7.18  | 59.6  | —              | —     | —     | 61.1            | 0.007          | 1.738             | 0.0               | —    | —    | —   |
| OsTe <sub>2</sub> | TPX                       | $P2_1/m(11)$  | —             | $C2/m(12)$    | 7.80               | 7.32  | 57.8  | —              | —     | —     | 57.6            | 0.221          | 3.032             | 0.0               | —    | —    | —   |
| OsI <sub>2</sub>  | TXX                       | $P3m1(164)$   | —             | $P3m1(164)$   | 8.13               | 8.13  | 60.1  | —              | —     | —     | —               | 2.659          | 5.434             | 0.0               | —    | —    | —   |
| OsCs <sub>2</sub> | HXX                       | —             | $P2/c(13)$    | —             | —                  | —     | —     | —              | 12.42 | 9.66  | 40.3            | 5.639          | 5.702             | —                 | —    | —    | —   |
| OsBa <sub>2</sub> | PXX                       | —             | —             | —             | —                  | —     | —     | —              | —     | —     | —               | 10.04          | 1.409             | 3.666             | —    | —    | 2.5 |
| OsHf <sub>2</sub> | TPX                       | $P1(2)$       | $Pm(6)$       | $P1(2)$       | 7.95               | 8.40  | 50.1  | —              | —     | —     | 47.4            | 0.007          | 0.966             | —                 | —    | —    | 0.0 |
| OsPb <sub>2</sub> | HXX                       | —             | $Pmmm2(25)$   | —             | —                  | —     | —     | —              | 7.65  | 6.39  | 51.9            | 4.336          | 4.336             | —                 | —    | —    | 0.0 |
| OsBi <sub>2</sub> | PTH                       | $P1(2)$       | $P4/mmm(123)$ | $P1(2)$       | 7.32               | 7.31  | 61.0  | 45.0           | 7.32  | 7.32  | 59.6            | 0.001          | 0.655             | 0.0               | 0.0  | 0.0  | 0.0 |
| IrBe <sub>2</sub> | HXX                       | —             | —             | —             | —                  | —     | —     | —              | 5.65  | 8.00  | —               | 3.811          | 6.232             | —                 | —    | —    | —   |
| IrB <sub>2</sub>  | TPX                       | $Pmmm(59)$    | —             | $Pmmm(59)$    | 7.61               | 7.61  | 47.7  | —              | —     | —     | 47.7            | 0.002          | 6.441             | 0.0               | —    | —    | —   |
| IrN <sub>2</sub>  | TPX                       | $C2/m(12)$    | —             | $C2/m(12)$    | 6.08               | 6.12  | 59.9  | —              | —     | —     | 60.9            | 0.001          | 1.903             | 0.0               | —    | —    | —   |
| IrO <sub>2</sub>  | PTX                       | $P3m1(164)$   | —             | $P3m1(164)$   | 6.35               | 6.37  | 55.1  | —              | —     | —     | 60.4            | 0.059          | 2.606             | 0.0               | —    | —    | —   |
| IrF <sub>2</sub>  | HTP                       | $Pnma(51)$    | $Pnma(47)$    | $Pnma(51)$    | 6.24               | 6.23  | 62.0  | —              | 8.41  | 6.40  | 39.9            | 0.084          | 0.743             | 0.0               | 0.0  | —    | —   |
| IrMg <sub>2</sub> | HXX                       | —             | $P4/mmm(123)$ | —             | —                  | —     | —     | —              | 9.00  | 6.35  | 44.8            | 3.230          | 10.834            | —                 | —    | —    | —   |
| IrAl <sub>2</sub> | THX                       | $P2_1/m(11)$  | $Pnmm(47)$    | $P2_1/m(11)$  | 8.48               | 6.52  | 49.5  | 39.0           | 8.80  | 6.84  | —               | 0.307          | 2.068             | 0.0               | 0.0  | —    | —   |
| IrSi <sub>2</sub> | HTX                       | $P1(2)$       | —             | $P1(2)$       | 8.20               | 7.97  | 51.6  | —              | —     | —     | —               | 0.639          | 1.006             | 0.0               | 0.0  | —    | —   |
| IrP <sub>2</sub>  | TPX                       | $P1(2)$       | $Pc(7)$       | $P1(2)$       | 7.53               | 8.02  | 51.0  | —              | —     | —     | 51.1            | 0.010          | 0.974             | 0.0               | —    | —    | —   |
| IrS <sub>2</sub>  | TXX                       | $P1(2)$       | —             | $P1(2)$       | 7.16               | 7.23  | 53.7  | —              | —     | —     | —               | 2.809          | 3.443             | 0.0               | —    | —    | —   |
| IrCa <sub>2</sub> | PHX                       | —             | $P4/mmm(123)$ | —             | —                  | —     | —     | —              | 6.95  | 9.83  | 45.0            | 0.250          | 2.053             | —                 | —    | —    | 0.0 |
| IrSe <sub>2</sub> | HTX                       | $P3m1(164)$   | —             | $P3m1(164)$   | 7.97               | 7.96  | 59.7  | —              | —     | —     | 52.8            | 0.002          | 1.432             | 0.0               | —    | —    | —   |
| IrTe <sub>2</sub> | HXX                       | —             | $P2/m(10)$    | —             | —                  | —     | —     | —              | 8.77  | 6.56  | 40.4            | 2.498          | 2.506             | —                 | —    | —    | 0.0 |
| IrGe <sub>2</sub> | HXX                       | —             | $Acm2(39)$    | —             | —                  | —     | —     | —              | 7.04  | 7.04  | 47.0            | 1.108          | 1.459             | —                 | —    | —    | 6.4 |
| IrSe <sub>2</sub> | TXX                       | $P1(2)$       | —             | $P1(2)$       | 7.46               | 7.54  | 53.3  | —              | —     | —     | —               | 2.084          | 3.579             | 0.0               | —    | —    | —   |

(Continued on next page)

Table 1: List of stable structures

| species           | initial structure indices | space group                  |                              |                   | lattice parameters |       |                | relative energy   |                   |      | spin moment |       |                            |
|-------------------|---------------------------|------------------------------|------------------------------|-------------------|--------------------|-------|----------------|-------------------|-------------------|------|-------------|-------|----------------------------|
|                   |                           | T                            | H                            | P                 | a [Å]              | b [Å] | $\gamma$ [deg] | $\Delta E_1$ [eV] | $\Delta E_2$ [eV] | T    | H           | P     | $[\mu_B/\text{unit cell}]$ |
| IrBr <sub>2</sub> | HXX                       | —                            | <i>Cmnm</i> (65)             | —                 | 7.41               | 9.03  | 52.7           | 1.219             | 1.663             | —    | —           | —     | —                          |
| IrSr <sub>2</sub> | HTX                       | <i>P3m1</i> (164)            | <i>P4/mmm</i> (123)          | —                 | 8.93               | 8.95  | 59.5           | 0.362             | 1.981             | —    | —           | —     | —                          |
| IrY <sub>2</sub>  | PTX                       | <i>P3m1</i> (164)            | <i>P4/mmm</i> (123)          | —                 | 8.37               | 8.37  | 59.6           | 0.156             | 2.223             | —    | —           | —     | —                          |
| IrZr <sub>2</sub> | HTP                       | <i>P3m1</i> (164)            | <i>P4/mmm</i> (123)          | <i>C2/m</i> (12)  | 8.28               | 8.25  | 60.0           | 7.75              | 9.08              | 50.1 | —           | —     | 0.0                        |
| IrIn <sub>2</sub> | HPT                       | <i>P3m1</i> (164)            | <i>P4/mmm</i> (123)          | <i>P3m1</i> (164) | 8.28               | 8.27  | 60.2           | 8.47              | 8.26              | 59.9 | —           | —     | 0.0                        |
| IrSb <sub>2</sub> | TXX                       | <i>P2<sub>1</sub>/m</i> (11) | <i>Amm2</i> (38)             | <i>P3m1</i> (164) | 7.25               | 8.03  | 56.3           | 8.14              | 8.18              | 60.5 | —           | —     | 0.0                        |
| IrTe <sub>2</sub> | TXX                       | <i>P1</i> (2)                | —                            | —                 | 7.96               | 8.03  | 53.1           | —                 | —                 | —    | —           | —     | —                          |
| IrI <sub>2</sub>  | TXX                       | <i>P3m1</i> (164)            | —                            | —                 | 8.10               | 8.10  | 59.8           | —                 | —                 | —    | —           | —     | —                          |
| IrBa <sub>2</sub> | PXX                       | <i>P3m1</i> (164)            | —                            | —                 | 9.28               | 9.29  | 59.5           | —                 | —                 | —    | —           | —     | —                          |
| IrHf <sub>2</sub> | PXX                       | —                            | —                            | —                 | —                  | —     | —              | —                 | —                 | —    | —           | —     | —                          |
| IrOs <sub>2</sub> | HXX                       | —                            | <i>P2/c</i> (13)             | —                 | —                  | —     | —              | —                 | —                 | —    | —           | —     | —                          |
| IrTi <sub>2</sub> | HPT                       | <i>P3m1</i> (164)            | <i>Pm</i> (6)                | —                 | 8.66               | 8.63  | 59.2           | 8.11              | 6.97              | 39.2 | —           | —     | 0.0                        |
| IrPb <sub>2</sub> | TPX                       | <i>P1</i> (2)                | —                            | —                 | 7.34               | 7.05  | 61.7           | 8.32              | 8.40              | 44.5 | —           | —     | 0.0                        |
| PtBe <sub>2</sub> | HXX                       | —                            | <i>Cmnm</i> (65)             | —                 | 6.41               | 8.39  | 40.2           | 6.41              | 8.01              | 45.8 | —           | —     | 0.0                        |
| PtB <sub>2</sub>  | TPX                       | <i>Cmnm</i> (65)             | —                            | —                 | 8.01               | 8.01  | 45.8           | —                 | —                 | —    | —           | —     | 0.0                        |
| PtO <sub>2</sub>  | TPX                       | <i>P3m1</i> (164)            | <i>P3m1</i> (164)            | —                 | 6.30               | 6.30  | 60.1           | 6.30              | 6.31              | 60.0 | —           | —     | 0.0                        |
| PtF <sub>2</sub>  | HXX                       | —                            | <i>Pmnm</i> (47)             | —                 | —                  | —     | —              | 8.83              | 6.67              | 39.2 | —           | —     | —                          |
| PtAl <sub>2</sub> | HXX                       | —                            | <i>C2/m</i> (12)             | —                 | —                  | —     | —              | 7.62              | 6.51              | 46.1 | —           | —     | —                          |
| PtSi <sub>2</sub> | HXX                       | —                            | <i>Pmc2<sub>1</sub></i> (26) | —                 | —                  | —     | —              | 7.68              | 9.04              | 31.8 | —           | —     | —                          |
| PtP <sub>2</sub>  | TPH                       | <i>C2/m</i> (12)             | <i>Pm</i> (6)                | —                 | 7.99               | 7.99  | 53.2           | 7.78              | 7.73              | 51.1 | —           | —     | 0.0                        |
| PtS <sub>2</sub>  | TPX                       | <i>P3m1</i> (164)            | —                            | —                 | 7.20               | 7.20  | 60.0           | —                 | —                 | —    | —           | —     | 0.0                        |
| PtCl <sub>2</sub> | PTH                       | <i>P1</i> (1)                | <i>Cmnm</i> (65)             | —                 | 10.87              | 10.48 | 36.1           | 8.74              | 8.63              | 47.1 | 7.98        | 7.98  | 0.0                        |
| PtK <sub>2</sub>  | TPX                       | <i>P3m1</i> (164)            | —                            | —                 | 10.23              | 10.22 | 59.1           | —                 | —                 | —    | 7.20        | 7.20  | 0.0                        |
| PtSc <sub>2</sub> | PTH                       | <i>P3m1</i> (164)            | <i>P6m2</i> (187)            | —                 | 10.23              | 10.22 | 59.1           | 8.74              | 8.63              | 47.1 | 7.80        | 7.82  | 0.0                        |
| PtTi <sub>2</sub> | HXX                       | —                            | <i>Pmnm</i> (47)             | —                 | 8.13               | 8.11  | 59.0           | 7.26              | 7.28              | 60.1 | 9.82        | 10.05 | 0.0                        |
| PtV <sub>2</sub>  | PXX                       | —                            | —                            | —                 | —                  | —     | —              | 9.50              | 7.72              | 35.7 | 8.02        | 8.07  | 0.0                        |
| PtGa <sub>2</sub> | HTX                       | <i>P3m1</i> (164)            | <i>Amm2</i> (38)             | —                 | —                  | —     | —              | —                 | —                 | —    | 7.51        | 6.20  | 0.0                        |
| PtAs <sub>2</sub> | TPH                       | <i>C2/m</i> (12)             | <i>Amm2</i> (38)             | —                 | 8.31               | 8.31  | 53.4           | 7.80              | 7.78              | 41.5 | —           | —     | 0.0                        |
| PtSe <sub>2</sub> | TXX                       | <i>P3m1</i> (164)            | <i>Amm2</i> (38)             | —                 | 7.53               | 7.53  | 60.1           | 8.32              | 8.32              | 40.4 | 8.31        | 8.31  | 0.0                        |
| PtRb <sub>2</sub> | TPX                       | <i>P3m1</i> (164)            | —                            | —                 | 10.62              | 10.61 | 58.8           | —                 | —                 | —    | —           | —     | 0.0                        |
| PtSr <sub>2</sub> | TXX                       | <i>P3m1</i> (164)            | —                            | —                 | 9.07               | 9.07  | 59.5           | —                 | —                 | —    | 10.24       | 10.23 | 0.0                        |
| PtY <sub>2</sub>  | TPH                       | <i>P3m1</i> (164)            | <i>P6m2</i> (187)            | —                 | 8.43               | 8.45  | 60.0           | 7.69              | 7.75              | 59.7 | 8.42        | 8.46  | 0.0                        |
| PtZr <sub>2</sub> | PXX                       | —                            | <i>P1</i> (2)                | —                 | —                  | —     | —              | —                 | —                 | —    | 8.68        | 6.52  | 0.0                        |
| PtNb <sub>2</sub> | THP                       | <i>C2/m</i> (12)             | <i>Amm2</i> (38)             | —                 | 9.42               | 9.42  | 33.1           | 9.95              | 8.57              | 34.2 | 9.67        | 7.29  | 0.0                        |
| PtRu <sub>2</sub> | TXX                       | <i>C2/m</i> (12)             | —                            | —                 | 9.23               | 9.23  | 33.5           | —                 | —                 | —    | 8.86        | 8.86  | 0.0                        |
| PtCd <sub>2</sub> | HXX                       | —                            | <i>Pmnm</i> (47)             | —                 | —                  | —     | —              | —                 | —                 | —    | —           | —     | 0.0                        |
| PtIn <sub>2</sub> | HTX                       | <i>P3m1</i> (164)            | <i>Amm2</i> (38)             | —                 | 8.56               | 8.53  | 60.2           | 8.10              | 8.10              | 42.5 | —           | —     | 0.0                        |
| PtTe <sub>2</sub> | TPX                       | <i>P3m1</i> (164)            | —                            | —                 | 8.06               | 8.06  | 60.0           | —                 | —                 | —    | 8.07        | 8.07  | 0.0                        |
| PtI <sub>2</sub>  | THX                       | <i>C2/m</i> (12)             | <i>Cmnm</i> (65)             | —                 | 10.27              | 10.31 | 44.7           | 9.81              | 9.74              | 47.3 | —           | —     | 0.0                        |
| PtCs <sub>2</sub> | THX                       | <i>P3m1</i> (164)            | <i>P3m1</i> (164)            | —                 | 10.67              | 10.67 | 60.0           | 10.67             | 10.67             | 60.0 | —           | —     | 0.0                        |
| PtHf <sub>2</sub> | TXX                       | <i>C2/m</i> (12)             | —                            | —                 | 6.43               | 8.63  | 56.0           | —                 | —                 | —    | —           | —     | 0.0                        |
| PtIr <sub>2</sub> | HTX                       | <i>C2/m</i> (12)             | <i>Amm2</i> (38)             | —                 | 9.25               | 9.25  | 33.1           | 9.09              | 9.10              | 33.2 | —           | —     | 0.0                        |
| PtAu <sub>2</sub> | HXX                       | —                            | <i>C2/m</i> (12)             | —                 | —                  | —     | —              | 7.88              | 6.77              | 44.4 | —           | —     | 0.0                        |
| PtHg <sub>2</sub> | HTX                       | <i>P3m1</i> (164)            | <i>Amm2</i> (38)             | —                 | 8.73               | 8.72  | 59.8           | 8.73              | 8.87              | 38.3 | —           | —     | 0.0                        |
| PtPt <sub>2</sub> | PHT                       | <i>P3m1</i> (164)            | <i>Amm2</i> (38)             | —                 | 8.73               | 8.72  | 58.9           | 8.37              | 8.39              | 43.6 | 8.63        | 8.37  | 0.0                        |
| PtPb <sub>2</sub> | TPH                       | <i>P2<sub>1</sub>/m</i> (11) | <i>P6</i> (174)              | —                 | 7.39               | 8.04  | 57.0           | 7.24              | 7.22              | 60.0 | 7.38        | 8.03  | 0.0                        |
| PtBi <sub>2</sub> | HPT                       | <i>P3m1</i> (164)            | <i>Amm2</i> (38)             | —                 | 8.76               | 8.68  | 58.8           | 7.10              | 8.60              | 52.6 | 8.70        | 8.16  | 0.0                        |
| AuBe <sub>2</sub> | PXX                       | —                            | <i>P6/mmm</i> (191)          | —                 | —                  | —     | —              | —                 | —                 | —    | 8.17        | 8.16  | 0.0                        |
| AuB <sub>2</sub>  | TPH                       | <i>P2/c</i> (13)             | <i>P2/c</i> (13)             | —                 | 8.66               | 8.40  | 42.2           | 8.42              | 8.67              | 42.2 | 0.004       | 0.005 | 0.0                        |
| AuO <sub>2</sub>  | PTH                       | <i>C2/m</i> (12)             | <i>P2/m</i> (10)             | —                 | 6.93               | 6.93  | 53.9           | 6.14              | 7.79              | 66.7 | 0.278       | 0.371 | 3.3                        |
| AuN <sub>5</sub>  | THX                       | <i>P2<sub>1</sub>/m</i> (11) | <i>Cmnm</i> (65)             | —                 | 9.75               | 7.58  | 48.7           | 7.50              | 10.43             | 42.6 | 0.527       | 3.404 | 0.0                        |
| AuAl <sub>2</sub> | PTX                       | <i>P3m1</i> (164)            | —                            | —                 | 8.87               | 8.88  | 59.9           | —                 | —                 | —    | —           | —     | 0.0                        |
| AuSi <sub>2</sub> | HXX                       | —                            | <i>Pmma</i> (51)             | —                 | —                  | —     | —              | 9.64              | 8.43              | 31.2 | —           | —     | 0.0                        |
| AuP <sub>2</sub>  | TPX                       | <i>P2/m</i> (10)             | —                            | —                 | 11.09              | 7.68  | 46.9           | —                 | —                 | —    | 9.01        | 9.00  | 0.0                        |
| AuS <sub>2</sub>  | PXX                       | —                            | —                            | —                 | —                  | —     | —              | —                 | —                 | —    | 10.41       | 7.81  | 0.0                        |
| AuCl <sub>2</sub> | THP                       | <i>C2/m</i> (12)             | <i>Cmnm</i> (65)             | —                 | 9.06               | 9.08  | 47.6           | 8.19              | 8.16              | 53.3 | 14.73       | 7.34  | 3.1                        |

(Continued on next page)

Table 1: List of stable structures

| species           | Initial structure      |                        | space group |                        |       | lattice parameters |                |       | relative energy |                |       | spin moment |                |                          |                   |      |      |     |
|-------------------|------------------------|------------------------|-------------|------------------------|-------|--------------------|----------------|-------|-----------------|----------------|-------|-------------|----------------|--------------------------|-------------------|------|------|-----|
|                   | indices                | T                      | H           | P                      | T     |                    |                | H     |                 |                | P     |             |                | $\mu_B/\text{unit cell}$ |                   |      |      |     |
|                   |                        |                        |             |                        | a [Å] | b [Å]              | $\gamma$ [deg] | a [Å] | b [Å]           | $\gamma$ [deg] | a [Å] | b [Å]       | $\gamma$ [deg] | $\Delta E_1$ [eV]        | $\Delta E_2$ [eV] | T    | H    | P   |
| AuK <sub>2</sub>  | P3m1(164)              | P3m1(164)              | Amn2(38)    | P1(2)                  | 9.75  | 9.76               | 59.6           | 10.01 | 10.08           | 50.6           | 9.73  | 11.17       | 51.1           | 0.142                    | 0.621             | 0.0  | 0.0  | 0.0 |
| AuCa <sub>2</sub> | P3m1(164)              | P3m1(164)              | —           | P3m1(164)              | 8.88  | 8.88               | 59.2           | —     | —               | —              | 8.79  | 8.78        | 59.9           | 0.007                    | 0.922             | 0.0  | —    | 0.0 |
| AuSc <sub>2</sub> | C2/m(12)               | C2/m(12)               | P6m2(187)   | P3m1(164)              | 8.70  | 8.65               | 55.4           | 6.98  | 6.98            | 60.0           | 8.68  | 8.60        | 56.4           | 0.216                    | 0.241             | 0.0  | 0.0  | 0.0 |
| AuCr <sub>2</sub> | —                      | —                      | C2/m(12)    | —                      | —     | —                  | —              | 8.58  | 7.43            | 42.8           | —     | —           | —              | 3.104                    | 3.114             | 0.0  | 36.8 | —   |
| AuMn <sub>2</sub> | P1(2)                  | P1(2)                  | —           | —                      | 8.41  | 7.57               | 39.5           | —     | —               | —              | —     | —           | —              | 4.828                    | 5.453             | 33.6 | —    | —   |
| AuGa <sub>2</sub> | C2/m(12)               | C2/m(12)               | Amn2(38)    | —                      | 8.84  | 8.84               | 35.9           | 8.86  | 8.82            | 35.7           | —     | —           | —              | 0.157                    | 0.838             | 0.0  | 0.0  | —   |
| AuGe <sub>2</sub> | —                      | —                      | Amn2(38)    | —                      | —     | —                  | —              | 8.91  | 8.89            | 36.1           | —     | —           | —              | 0.908                    | 0.962             | 0.0  | 0.0  | —   |
| AuHf <sub>2</sub> | P3m1(164)              | P3m1(164)              | Amn2(38)    | —                      | 7.62  | 7.61               | 60.0           | 7.83  | 11.25           | 44.2           | 9.54  | 9.89        | 66.3           | 0.426                    | 0.545             | 0.0  | 0.0  | 0.0 |
| AuY <sub>2</sub>  | C2/m(12)               | C2/m(12)               | Amn2(25)    | —                      | 9.13  | 9.14               | 49.1           | 8.48  | 8.48            | 53.4           | —     | —           | —              | 0.020                    | 0.853             | 0.0  | 0.0  | —   |
| AuBr <sub>2</sub> | P3m1(164)              | P3m1(164)              | Cmmn(65)    | —                      | 10.14 | 10.17              | 60.1           | 10.04 | 10.00           | 55.1           | 13.99 | 13.98       | 40.8           | 0.437                    | 0.491             | 0.0  | 0.0  | 0.0 |
| AuRb <sub>2</sub> | P3m1(164)              | P3m1(164)              | Amn2(38)    | —                      | 9.34  | 9.35               | 59.4           | —     | —               | —              | —     | —           | —              | 1.124                    | 1.688             | 0.0  | 0.0  | —   |
| AuSr <sub>2</sub> | C2/m(12)               | C2/m(12)               | P6m2(187)   | C2/m(12)               | 9.06  | 9.01               | 55.0           | 7.58  | 7.60            | 60.2           | 9.01  | 8.97        | 55.0           | 0.274                    | 0.282             | 0.0  | 0.0  | 0.0 |
| AuY <sub>2</sub>  | C2/m(12)               | C2/m(12)               | Amn2(38)    | —                      | 9.68  | 9.67               | 32.9           | 9.40  | 9.42            | 33.5           | —     | —           | —              | 0.742                    | 2.001             | 0.0  | 0.0  | —   |
| AuPd <sub>2</sub> | P6/mmm(191)            | P6/mmm(191)            | Amn2(38)    | —                      | 9.75  | 9.75               | 59.9           | 9.14  | 9.10            | 35.8           | 9.75  | 9.75        | 59.9           | 0.028                    | 0.460             | 0.0  | 0.0  | 0.0 |
| AuIn <sub>2</sub> | P3m1(164)              | P3m1(164)              | Pmmn(25)    | —                      | 7.33  | 7.31               | 61.8           | 7.13  | 7.03            | 51.4           | —     | —           | —              | 0.403                    | 1.982             | 0.0  | 0.0  | —   |
| AuSn <sub>2</sub> | —                      | —                      | P4/mmm(123) | —                      | —     | —                  | —              | 6.49  | 8.83            | 42.3           | —     | —           | —              | 2.861                    | 2.870             | 0.0  | —    | —   |
| AuSb <sub>2</sub> | P3m1(164)              | P3m1(164)              | Pc(7)       | —                      | 8.60  | 8.57               | 59.3           | 9.04  | 9.05            | 44.3           | —     | —           | —              | 0.171                    | 1.440             | 0.0  | 0.0  | —   |
| AuTe <sub>2</sub> | P3m1(164)              | P3m1(164)              | —           | —                      | 8.11  | 8.10               | 59.9           | —     | —               | —              | 10.47 | 10.47       | 61.3           | 0.024                    | 0.917             | 0.0  | 0.0  | —   |
| Au <sub>2</sub>   | C2/m(12)               | C2/m(12)               | Cmmn(65)    | P2 <sub>1</sub> /m(11) | 9.66  | 9.68               | 48.9           | 9.12  | 9.12            | 52.3           | —     | —           | —              | 0.111                    | 0.875             | 0.0  | 0.0  | —   |
| AuCs <sub>2</sub> | P3m1(164)              | P3m1(164)              | Amn2(38)    | P1(2)                  | 10.73 | 10.72              | 59.6           | 10.62 | 10.69           | 55.1           | 14.80 | 15.03       | 37.9           | 0.621                    | 0.654             | 0.0  | 0.0  | 0.0 |
| AuIr <sub>2</sub> | Pmmn(59)               | Pmmn(59)               | —           | Pmmn(59)               | 8.35  | 8.87               | 57.9           | —     | —               | —              | 8.38  | 8.37        | 63.9           | 0.161                    | 2.445             | 0.0  | 0.0  | —   |
| AuHg <sub>2</sub> | P3m1(164)              | P3m1(164)              | Amn2(38)    | —                      | 9.44  | 9.43               | 58.5           | 9.11  | 9.09            | 36.8           | —     | —           | —              | 0.323                    | 0.914             | 0.0  | 0.0  | —   |
| AuPb <sub>2</sub> | —                      | —                      | P4/mmm(123) | —                      | —     | —                  | —              | 7.20  | 10.40           | 43.9           | —     | —           | —              | 0.933                    | 0.981             | 0.0  | 0.0  | —   |
| AuBi <sub>2</sub> | P3m1(164)              | P3m1(164)              | Amn2(38)    | P1(1)                  | 8.89  | 8.88               | 57.7           | 8.29  | 8.29            | 60.0           | —     | —           | —              | 0.112                    | 0.325             | 0.0  | 0.0  | —   |
| HgLi <sub>2</sub> | P6/mmm(191)            | P6/mmm(191)            | P6/mmm(123) | P1(1)                  | 8.29  | 8.29               | 60.0           | 8.29  | 8.29            | 60.0           | —     | —           | —              | 1.596                    | 3.332             | 0.0  | 0.0  | —   |
| HgBe <sub>2</sub> | P3m1(164)              | P3m1(164)              | —           | P6/mmm(191)            | —     | —                  | —              | —     | —               | —              | 8.29  | 8.30        | 59.9           | 0.016                    | 0.018             | 0.0  | 0.0  | 0.0 |
| HgO <sub>2</sub>  | PXX                    | PXX                    | —           | P2/m(10)               | —     | —                  | —              | —     | —               | —              | 9.53  | 9.77        | 59.4           | 2.593                    | 4.809             | —    | —    | —   |
| HgF <sub>2</sub>  | P3m1(164)              | P3m1(164)              | —           | P3m1(164)              | 7.45  | 7.46               | 59.4           | —     | —               | —              | 7.45  | 7.45        | 59.6           | 0.001                    | 1.882             | 0.0  | —    | —   |
| HgP <sub>2</sub>  | P2/m(10)               | P2/m(10)               | —           | P1(1)                  | 12.10 | 8.10               | 46.7           | —     | —               | —              | 9.72  | 9.46        | 58.5           | 0.798                    | 3.283             | 0.0  | 0.0  | —   |
| HgCl <sub>2</sub> | P3m1(164)              | P3m1(164)              | C2/m(12)    | —                      | 8.21  | 8.22               | 57.2           | 9.88  | 8.34            | 53.0           | —     | —           | —              | 0.350                    | 1.827             | 0.0  | 0.0  | —   |
| HgCa <sub>2</sub> | P2 <sub>1</sub> /m(11) | P2 <sub>1</sub> /m(11) | P6m2(187)   | P3m1(164)              | 7.78  | 9.09               | 54.1           | 8.01  | 7.99            | 59.8           | —     | —           | —              | 0.167                    | 0.272             | 0.0  | 0.0  | —   |
| HgGe <sub>2</sub> | PXX                    | PXX                    | —           | P3m1(156)              | —     | —                  | —              | —     | —               | —              | 8.14  | 8.10        | 59.8           | 2.224                    | 3.213             | —    | —    | —   |
| HgSe <sub>2</sub> | PHX                    | PHX                    | C2/m(12)    | P1(1)                  | —     | —                  | —              | 8.58  | 8.56            | 86.4           | —     | —           | —              | 0.539                    | 4.257             | —    | —    | —   |
| HgBr <sub>2</sub> | THX                    | THX                    | C2/m(12)    | —                      | 8.49  | 9.57               | 54.9           | 8.43  | 8.41            | 68.4           | —     | —           | —              | 0.079                    | 0.926             | 0.0  | 0.0  | —   |
| HgSr <sub>2</sub> | HPT                    | HPT                    | P6m2(187)   | P1(2)                  | 9.00  | 8.90               | 59.5           | 8.75  | 8.70            | 59.2           | 9.17  | 9.58        | 56.6           | 0.022                    | 0.108             | 0.0  | 0.0  | 0.0 |
| HgAg <sub>2</sub> | P6/mmm(191)            | P6/mmm(191)            | —           | Pm(6)                  | 10.01 | 10.02              | 59.7           | —     | —               | —              | 10.01 | 10.01       | 59.7           | 0.055                    | 1.936             | 0.0  | 0.0  | 0.0 |
| HgSb <sub>2</sub> | C2/m(12)               | C2/m(12)               | Amn2(38)    | —                      | —     | —                  | —              | 9.70  | 9.71            | 38.1           | 9.31  | 9.34        | 59.7           | 0.567                    | 1.287             | —    | —    | —   |
| HgI <sub>2</sub>  | P3m1(164)              | P3m1(164)              | P4m2(115)   | —                      | 10.21 | 9.10               | 54.9           | 9.01  | 9.02            | 87.1           | —     | —           | —              | 0.295                    | 1.328             | 0.0  | 0.0  | —   |
| HgCs <sub>2</sub> | THX                    | THX                    | —           | —                      | 11.55 | 11.43              | 57.4           | —     | —               | —              | —     | —           | —              | 1.902                    | 3.325             | 0.0  | —    | —   |
| HgBa <sub>2</sub> | PXX                    | PXX                    | P6m2(187)   | —                      | —     | —                  | —              | 9.26  | 9.17            | 58.8           | 8.96  | 11.04       | 50.6           | 0.760                    | 1.059             | —    | —    | —   |
| HgPt <sub>2</sub> | P6mm(183)              | P6mm(183)              | —           | C2/m(12)               | 9.18  | 9.18               | 60.0           | —     | —               | —              | 9.20  | 9.14        | 60.2           | 0.055                    | 2.866             | 0.0  | 0.0  | 0.0 |
| HgBi <sub>2</sub> | C2/m(12)               | C2/m(12)               | —           | Pmmn(59)               | 13.27 | 13.23              | 38.3           | —     | —               | —              | —     | —           | —              | 2.268                    | 3.304             | 0.0  | —    | —   |
| TlBe <sub>2</sub> | P6/mmm(191)            | P6/mmm(191)            | P6/mmm(191) | —                      | 8.40  | 8.40               | 60.0           | 8.39  | 8.39            | 60.0           | 8.40  | 8.40        | 59.9           | 0.005                    | 0.006             | 0.0  | 0.0  | 0.0 |
| TlN <sub>2</sub>  | PXX                    | PXX                    | —           | P1(1)                  | —     | —                  | —              | —     | —               | —              | 11.28 | 9.45        | 61.4           | 17.897                   | 18.774            | —    | —    | —   |
| TlNa <sub>2</sub> | THX                    | THX                    | Pmmn(47)    | —                      | 8.95  | 11.56              | 37.8           | 8.91  | 11.53           | 37.9           | —     | —           | —              | 0.024                    | 3.001             | 0.0  | 0.0  | —   |
| TlS <sub>2</sub>  | PXX                    | PXX                    | —           | P2(3)                  | —     | —                  | —              | —     | —               | —              | 7.82  | 8.95        | 94.4           | 5.582                    | 5.834             | —    | —    | —   |
| TlCa <sub>2</sub> | HPX                    | HPX                    | P4/mmm(123) | C2/m(12)               | —     | —                  | —              | 7.66  | 10.85           | 45.0           | 9.88  | 8.16        | 51.4           | 0.389                    | 1.984             | —    | —    | —   |
| TlCr <sub>2</sub> | HXX                    | HXX                    | P1(2)       | —                      | —     | —                  | —              | 11.10 | 7.66            | 33.2           | —     | —           | —              | 5.563                    | 5.653             | —    | —    | —   |
| TlBr <sub>2</sub> | HPT                    | HPT                    | P2(3)       | —                      | 9.39  | 8.65               | 62.1           | —     | —               | —              | —     | —           | —              | 0.204                    | 0.207             | 0.0  | 0.0  | 0.0 |
| TlSr <sub>2</sub> | PXX                    | PXX                    | —           | P1(2)                  | —     | —                  | —              | 11.31 | 11.75           | 41.1           | 8.42  | 13.59       | 55.8           | 1.108                    | 1.465             | —    | —    | —   |
| TlIn <sub>2</sub> | HPX                    | HPX                    | Amn2(38)    | C2/m(12)               | —     | —                  | —              | 6.97  | 6.64            | 58.4           | 8.58  | 10.54       | 51.4           | 1.108                    | 1.465             | —    | —    | —   |
| TlI <sub>2</sub>  | THX                    | THX                    | —           | Cm(8)                  | —     | —                  | —              | —     | —               | —              | 6.74  | 7.77        | 64.0           | 0.448                    | 4.086             | —    | —    | —   |
| TlBa <sub>2</sub> | HPX                    | HPX                    | —           | P1(2)                  | 9.18  | 9.17               | 57.7           | —     | —               | —              | 10.73 | 11.54       | 71.8           | 0.527                    | 1.204             | 0.0  | 0.0  | 0.0 |
| TlTi <sub>2</sub> | —                      | —                      | P4/mmm(123) | P2 <sub>1</sub> /m(11) | —     | —                  | —              | 8.60  | 12.17           | 45.0           | 8.96  | 10.88       | 52.3           | 0.492                    | 1.832             | —    | —    | —   |
| TlPb <sub>2</sub> | HXX                    | HXX                    | P6m2(187)   | —                      | —     | —                  | —              | 7.10  | 7.09            | 58.7           | —     | —           | —              | 2.866                    | 3.135             | —    | —    | —   |
| PbN <sub>2</sub>  | P6mm(183)              | P6mm(183)              | —           | P1(2)                  | 8.03  | 8.03               | 60.0           | —     | —               | —              | 8.03  | 8.03        | 60.0           | 0.000                    | 6.908             | 0.0  | 0.0  | 0.0 |
| PbO <sub>2</sub>  | P3m1(164)              | P3m1(164)              | —           | P3m1(164)              | 6.88  | 6.88               | 60.0           | —     | —               | —              | 6.88  | 6.88        | 59.9           | 0.006                    | 4.286             | 0.0  | —    | —   |

(Continued on next page)

Table 1: List of stable structures

| species           | Initial structure indices | space group       |                  |                     |       | lattice parameters |       |       |                | relative energy   |                   |       |      | spin moment |                            |     |   |     |
|-------------------|---------------------------|-------------------|------------------|---------------------|-------|--------------------|-------|-------|----------------|-------------------|-------------------|-------|------|-------------|----------------------------|-----|---|-----|
|                   |                           | T                 | H                | P                   |       | a [Å]              | b [Å] | c [Å] | $\gamma$ [deg] | $\Delta E_1$ [eV] | $\Delta E_2$ [eV] | T     | H    | P           | $[\mu_B/\text{unit cell}]$ |     |   |     |
|                   |                           |                   |                  |                     |       |                    |       |       |                |                   |                   |       |      |             |                            |     |   |     |
| PbF <sub>2</sub>  | PTX                       | $P\bar{3}m1(164)$ | —                | $P\bar{3}m1(164)$   | 8.05  | 8.06               | 59.8  | —     | —              | —                 | 8.06              | 8.07  | 59.6 | 0.013       | 1.893                      | 0.0 | — | 0.0 |
| PbS <sub>2</sub>  | PXX                       | —                 | —                | $P1(1)$             | —     | —                  | —     | —     | —              | —                 | 8.63              | 8.17  | 84.5 | 2.214       | 2.219                      | —   | — | 0.0 |
| PbCl <sub>2</sub> | TPX                       | $P\bar{3}m1(164)$ | —                | $Pm\bar{m}m(59)$    | 8.81  | 8.81               | 59.9  | —     | —              | —                 | 8.99              | 8.70  | 58.2 | 0.336       | 1.116                      | 0.0 | — | 0.0 |
| PbCa <sub>2</sub> | PTX                       | $P\bar{3}m1(164)$ | —                | $P\bar{3}m1(164)$   | 10.26 | 10.26              | 59.7  | —     | —              | —                 | 10.22             | 10.21 | 60.0 | 0.006       | 2.093                      | 0.0 | — | 0.0 |
| PbSc <sub>2</sub> | PXX                       | —                 | —                | $C2/m(12)$          | —     | —                  | —     | —     | —              | —                 | 8.07              | 6.17  | 67.4 | 2.664       | 6.488                      | —   | — | 0.0 |
| PbGe <sub>2</sub> | TXX                       | $P\bar{1}(2)$     | —                | —                   | 11.49 | 8.02               | 39.4  | —     | —              | —                 | —                 | —     | —    | 0.906       | 3.153                      | 0.0 | — | —   |
| PbSe <sub>2</sub> | PXX                       | —                 | —                | $P1(1)$             | —     | —                  | —     | —     | —              | —                 | 10.24             | 8.22  | 73.1 | 1.315       | 3.941                      | —   | — | 0.0 |
| PbBr <sub>2</sub> | PTX                       | $P\bar{3}m1(164)$ | —                | $P\bar{3}m1(164)$   | 8.95  | 8.94               | 60.2  | —     | —              | —                 | 8.94              | 8.94  | 59.9 | 0.004       | 0.939                      | 0.0 | — | 0.0 |
| PbRb <sub>2</sub> | HXX                       | —                 | $Amm2(38)$       | —                   | —     | —                  | —     | —     | —              | —                 | 10.96             | 11.95 | 46.2 | 1.818       | 3.099                      | —   | — | 0.0 |
| PbSr <sub>2</sub> | PTX                       | $P\bar{3}m1(164)$ | —                | $P\bar{3}m1(164)$   | 10.69 | 10.68              | 59.7  | —     | —              | —                 | 10.64             | 10.63 | 59.9 | 0.004       | 1.946                      | 0.0 | — | 0.0 |
| PbIn <sub>2</sub> | HXX                       | —                 | $Amm2(38)$       | —                   | —     | —                  | —     | —     | —              | —                 | 9.90              | 9.90  | 38.4 | 1.235       | 1.498                      | —   | — | 0.0 |
| Pb <sub>2</sub>   | PTX                       | $P\bar{3}m1(164)$ | —                | $P\bar{3}m1(164)$   | 9.33  | 9.33               | 59.4  | —     | —              | —                 | 9.26              | 9.26  | 60.0 | 0.002       | 0.862                      | 0.0 | — | 0.0 |
| PbCs <sub>2</sub> | HXX                       | —                 | $Cm\bar{m}m(65)$ | —                   | —     | —                  | —     | —     | —              | —                 | 10.34             | 13.60 | 40.1 | 2.093       | 3.761                      | —   | — | 0.0 |
| PbBa <sub>2</sub> | PTX                       | $P\bar{3}m1(164)$ | —                | $P\bar{3}m1(164)$   | 11.06 | 11.04              | 59.4  | —     | —              | —                 | 10.96             | 10.94 | 59.7 | 0.007       | 1.629                      | 0.0 | — | 0.0 |
| PbTi <sub>2</sub> | HXX                       | —                 | $P2/m(10)$       | —                   | —     | —                  | —     | —     | —              | —                 | 12.44             | 9.42  | 33.2 | 2.366       | 3.528                      | —   | — | 0.0 |
| BiLi <sub>2</sub> | THX                       | $P\bar{1}(2)$     | —                | $Amm2(38)$          | 10.13 | 9.04               | 39.2  | —     | —              | —                 | 9.50              | 9.45  | 41.8 | 0.802       | 2.355                      | 0.0 | — | 0.0 |
| BiBe <sub>2</sub> | PTX                       | $P\bar{1}(2)$     | —                | —                   | 5.67  | 7.92               | 66.9  | —     | —              | —                 | —                 | —     | —    | 0.032       | 10.589                     | 0.0 | — | 0.0 |
| BiO <sub>2</sub>  | PXX                       | —                 | —                | $P\bar{1}(2)$       | —     | —                  | —     | —     | —              | —                 | 5.31              | 8.06  | 53.2 | 0.895       | 3.859                      | —   | — | 0.0 |
| BiAl <sub>2</sub> | PHT                       | —                 | —                | $P1(1)$             | —     | —                  | —     | —     | —              | —                 | 7.52              | 6.43  | 59.3 | 0.895       | 3.859                      | —   | — | 0.0 |
| BiSi <sub>2</sub> | PTX                       | $P\bar{3}m1(164)$ | —                | $P6/m\bar{m}m(191)$ | 8.84  | 8.84               | 59.7  | —     | —              | —                 | 8.63              | 8.60  | 62.2 | 0.564       | 0.719                      | 0.0 | — | 0.0 |
| BiP <sub>2</sub>  | PXX                       | $P\bar{1}(2)$     | —                | $P2_1/m(11)$        | 10.50 | 13.65              | 30.6  | —     | —              | —                 | 10.25             | 10.25 | 62.2 | 0.606       | 6.198                      | 0.0 | — | 0.0 |
| BiS <sub>2</sub>  | PTX                       | $P\bar{3}m1(164)$ | —                | $P\bar{1}(2)$       | —     | —                  | —     | —     | —              | —                 | 9.70              | 7.16  | 67.1 | 1.029       | 10.019                     | —   | — | 0.0 |
| BiCl <sub>2</sub> | HXX                       | —                 | $Pm(6)$          | —                   | 7.87  | 7.86               | 59.6  | —     | —              | —                 | 9.95              | 8.55  | 63.7 | 0.397       | 2.636                      | 0.0 | — | 0.0 |
| BiK <sub>2</sub>  | HXX                       | —                 | $Pm\bar{m}m(47)$ | —                   | —     | —                  | —     | —     | —              | —                 | 8.48              | 7.95  | 64.7 | 1.887       | 2.316                      | —   | — | 0.0 |
| BiCa <sub>2</sub> | TPX                       | $C2/m(12)$        | —                | $C2/m(12)$          | 9.52  | 9.42               | 59.6  | —     | —              | —                 | 9.41              | 9.44  | 60.7 | 0.001       | 1.141                      | 0.0 | — | 0.0 |
| BiSe <sub>2</sub> | TXX                       | $P\bar{1}(2)$     | —                | —                   | 8.76  | 8.31               | 62.9  | —     | —              | —                 | —                 | —     | —    | 1.271       | 3.748                      | 1.8 | — | 0.0 |
| BiV <sub>2</sub>  | HXX                       | —                 | $Pm(6)$          | —                   | —     | —                  | —     | —     | —              | —                 | 7.64              | 9.06  | 31.0 | 13.294      | 13.298                     | —   | — | 0.0 |
| BiGe <sub>2</sub> | PXX                       | —                 | —                | $Pc(7)$             | —     | —                  | —     | —     | —              | —                 | —                 | —     | —    | 1.002       | 2.791                      | —   | — | 0.0 |
| BiSe <sub>2</sub> | PXX                       | —                 | $Pm(6)$          | $Cm(8)$             | —     | —                  | —     | —     | —              | —                 | —                 | —     | —    | 0.884       | 2.750                      | —   | — | 0.0 |
| BiBr <sub>2</sub> | HXX                       | —                 | —                | —                   | —     | —                  | —     | —     | —              | —                 | 8.66              | 9.05  | 54.8 | 1.745       | 2.808                      | —   | — | 0.0 |
| BiRb <sub>2</sub> | HXX                       | —                 | $Pm\bar{m}m(47)$ | —                   | —     | —                  | —     | —     | —              | —                 | 9.89              | 12.97 | 39.9 | —           | —                          | —   | — | 0.0 |
| BiSr <sub>2</sub> | TPX                       | $C2/m(12)$        | —                | $P\bar{1}(2)$       | 10.03 | 9.93               | 59.8  | —     | —              | —                 | 9.92              | 10.01 | 59.9 | 0.009       | 1.115                      | 0.0 | — | 0.0 |
| BiY <sub>2</sub>  | TPX                       | $P2_1/m(11)$      | —                | $Cm(8)$             | 9.36  | 8.46               | 63.0  | —     | —              | —                 | 9.48              | 8.47  | 55.8 | 0.565       | 1.703                      | 0.0 | — | 1.7 |
| BiIn <sub>2</sub> | HXX                       | —                 | $Amm2(38)$       | —                   | —     | —                  | —     | —     | —              | —                 | —                 | —     | —    | 1.375       | 2.254                      | —   | — | 0.0 |
| BiTe <sub>2</sub> | THX                       | $P\bar{3}m1(164)$ | —                | $P1(1)$             | 8.59  | 8.59               | 56.1  | —     | —              | —                 | 9.32              | 9.28  | 42.6 | 0.370       | 0.993                      | 0.0 | — | 0.0 |
| Bi <sub>2</sub>   | HXX                       | —                 | $Pm(6)$          | —                   | —     | —                  | —     | —     | —              | —                 | 9.56              | 10.21 | 51.3 | 0.896       | 1.507                      | —   | — | 0.0 |
| BiCs <sub>2</sub> | HXX                       | —                 | $Pm(6)$          | —                   | —     | —                  | —     | —     | —              | —                 | 9.05              | 8.79  | 62.4 | 0.896       | 1.507                      | —   | — | 0.0 |
| BiBa <sub>2</sub> | TPX                       | $P\bar{3}m1(164)$ | —                | $Pm(6)$             | —     | —                  | —     | —     | —              | —                 | 11.35             | 12.72 | 42.6 | 1.364       | 2.997                      | —   | — | 0.0 |
| BiRe <sub>2</sub> | HXX                       | —                 | $Aem2(39)$       | —                   | 10.20 | 10.20              | 59.7  | —     | —              | —                 | 10.36             | 10.18 | 60.7 | 0.022       | 1.152                      | 0.0 | — | 0.0 |
| BiHg <sub>2</sub> | HXX                       | —                 | $Amm2(38)$       | —                   | —     | —                  | —     | —     | —              | —                 | 10.43             | 10.45 | 23.7 | 5.278       | 16.490                     | —   | — | 0.0 |
| BiTi <sub>2</sub> | HXX                       | —                 | $Amm2(38)$       | —                   | —     | —                  | —     | —     | —              | —                 | 10.97             | 10.95 | 33.0 | 0.957       | 1.721                      | —   | — | 0.0 |
| BiPb <sub>2</sub> | THP                       | $P\bar{1}(2)$     | —                | $P1(1)$             | 11.60 | 12.02              | 33.3  | —     | —              | —                 | 9.88              | 9.86  | 41.5 | 1.495       | 1.525                      | —   | — | 0.0 |
| BiBi <sub>2</sub> | TPX                       | $P\bar{1}(2)$     | —                | $P1(1)$             | 8.12  | 12.03              | 72.0  | —     | —              | —                 | 10.41             | 9.97  | 50.7 | 0.090       | 0.223                      | 0.0 | — | 0.0 |
|                   |                           |                   |                  |                     |       |                    |       |       |                |                   | 8.98              | 12.04 | 56.4 | 0.133       | 2.147                      | —   | — | 0.0 |
