# Supplementary material for: A structure map for AB2 type 2D materials using high-throughput DFT calculations
Source: Royal Society of Chemistry journal article supplement (doi:10.1039/d0ma00999g), 2021-01-01
Supplement: d0ma00999g3.pdf [file d0ma00999g3.pdf]

### Supplemental information 3

The space-group, lattice parameters, relative energy and spin magnetic moment are shown in the following tables. These tables are classified by each combination of groups in the periodic table. For example, “I-XV” means that atom A and atom B are in group I and XV, respectively. T, H, and P represent the types of initial structures. The order of THP represents their stability. For example, “PTX” means the planar type initial structure is the most stable, the 1T type one is the second stable, and the 1H type one is much more unstable than the others. X represents a structure whose relative energy exceed 0.03 Hartree ( $\approx 0.82$  eV) per the unit cell including 12 atoms. The space-groups of the obtained final structures for each initial states are also shown. The definitions of relative energies  $\Delta E_1$  and  $\Delta E_2$  are as follows:  $\Delta E_1 = E_{\text{the second stable structure}} - E_{\text{the most stable structure}}$ , and  $\Delta E_2 = E_{\text{the third stable structure}} - E_{\text{the most stable structure}}$ .

Table 1: List of I-I

| species           | Initial structure indices | space group                          |                  | lattice parameters |       |       |                |       |       | relative energy |                | spin moment       |                   |     |     |     |
|-------------------|---------------------------|--------------------------------------|------------------|--------------------|-------|-------|----------------|-------|-------|-----------------|----------------|-------------------|-------------------|-----|-----|-----|
|                   |                           | T                                    | H                | a [Å]              | b [Å] | c [Å] | $\gamma$ [deg] | a [Å] | b [Å] | c [Å]           | $\gamma$ [deg] | $\Delta E_1$ [eV] | $\Delta E_2$ [eV] | T   | H   | P   |
| LiLi <sub>2</sub> | H1TX                      | <i>Cmmm</i> (65)                     | <i>Amm2</i> (38) | 5.97               | 7.76  | 49.0  | 6.03           | 6.52  | 57.8  | —               | —              | 0.160             | 4.548             | 0.0 | 0.0 | —   |
| LiCs <sub>2</sub> | HXX                       | —                                    | <i>Amm2</i> (38) | —                  | —     | —     | 12.59          | 12.52 | 46.3  | —               | —              | 0.865             | 1.607             | —   | 0.0 | —   |
| RbK <sub>2</sub>  | TPX                       | <i>P<math>\bar{3}m1</math></i> (164) | —                | 16.29              | 16.29 | 59.5  | —              | —     | —     | —               | —              | 0.042             | 2.192             | 0.0 | —   | 0.0 |
| CsK <sub>2</sub>  | P1TX                      | <i>P6/mmm</i> (191)                  | —                | 17.01              | 16.99 | 57.9  | —              | —     | —     | —               | —              | 0.034             | 2.466             | 0.0 | —   | 0.0 |
| CsRb <sub>2</sub> | PTX                       | <i>P6/mmm</i> (191)                  | —                | 17.64              | 17.65 | 59.0  | —              | —     | —     | —               | —              | 0.012             | 2.173             | 0.0 | —   | 0.0 |
| CsCs <sub>2</sub> | PTX                       | <i>P3m1</i> (164)                    | —                | 18.62              | 18.63 | 58.2  | —              | —     | —     | —               | —              | 0.027             | 2.081             | 0.0 | —   | 0.0 |

Table 2: List of I-II

| species           | Initial structure indices | space group         |                              |                  | lattice parameters |       |       |                |       |       | relative energy |                | spin moment       |                   |       |     |     |     |
|-------------------|---------------------------|---------------------|------------------------------|------------------|--------------------|-------|-------|----------------|-------|-------|-----------------|----------------|-------------------|-------------------|-------|-----|-----|-----|
|                   |                           | T                   | H                            | P                | a [Å]              | b [Å] | c [Å] | $\gamma$ [deg] | a [Å] | b [Å] | c [Å]           | $\gamma$ [deg] | $\Delta E_1$ [eV] | $\Delta E_2$ [eV] | T     | H   | P   |     |
| LiMg <sub>2</sub> | THX                       | <i>C2/m</i> (12)    | <i>Amm2</i> (38)             | -                | 6.15               | 6.61  | 56.9  | 6.60           | 6.17  | 57.5  | -               | 0.152          | 3.972             | 0.0               | 0.0   | -   | -   | -   |
| LiBa <sub>2</sub> | HXX                       | -                   | <i>P4/mmm</i> (123)          | -                | -                  | -     | -     | 12.24          | 8.58  | 44.8  | -               | 1.109          | 6.245             | -                 | 0.0   | -   | -   | -   |
| KSr <sub>2</sub>  | HXX                       | -                   | <i>P1</i> (1)                | -                | -                  | -     | -     | 14.90          | 12.22 | 34.9  | -               | 4.308          | 4.310             | -                 | 0.0   | -   | -   | -   |
| KBa <sub>2</sub>  | HXX                       | -                   | <i>Amm2</i> (38)             | -                | -                  | -     | -     | 14.40          | 14.44 | 34.8  | -               | 1.099          | 1.172             | -                 | 0.0   | -   | -   | -   |
| RbCa <sub>2</sub> | HXX                       | -                   | <i>P2<sub>1</sub>/m</i> (11) | -                | -                  | -     | -     | 14.39          | 15.13 | 16.3  | -               | 7.929          | 7.954             | -                 | 0.0   | -   | -   | -   |
| RbSr <sub>2</sub> | HTP                       | <i>P6/mmm</i> (191) | <i>Amm2</i> (38)             | -                | 15.62              | 15.61 | 60.1  | 16.32          | 16.39 | 30.0  | 15.95           | 15.95          | 58.0              | 0.754             | 0.786 | 0.0 | 0.0 | 0.0 |
| RbBa <sub>2</sub> | HXX                       | -                   | <i>Amm2</i> (38)             | -                | -                  | -     | -     | 15.30          | 15.34 | 33.0  | -               | 0.831          | 0.907             | -                 | 0.0   | -   | -   | -   |
| CsCa <sub>2</sub> | TPX                       | <i>P6/mmm</i> (191) | -                            | <i>Cmmm</i> (65) | 15.19              | 15.20 | 58.9  | -              | -     | -     | 15.56           | 15.57          | 56.4              | 0.044             | 3.461 | 0.0 | -   | 0.0 |
| CsSr <sub>2</sub> | TPX                       | <i>P6/mmm</i> (191) | -                            | <i>Cmmm</i> (65) | 16.14              | 16.13 | 59.2  | -              | -     | -     | 16.59           | 16.57          | 56.7              | 0.069             | 3.214 | 0.0 | -   | 0.0 |

Table 3: List of I-XII

| species           | Initial structure indices |         | space group    |         | lattice parameters |                |         | relative energy   |                   | spin moment        |       |   |     |
|-------------------|---------------------------|---------|----------------|---------|--------------------|----------------|---------|-------------------|-------------------|--------------------|-------|---|-----|
|                   | T                         | H       | P              | H       | T                  | H              | P       | $\Delta E_1$ [eV] | $\Delta E_2$ [eV] | $\mu_B$ /unit cell |       |   |     |
|                   | $a$ [Å]                   | $b$ [Å] | $\gamma$ [deg] | $a$ [Å] | $b$ [Å]            | $\gamma$ [deg] | $a$ [Å] | $b$ [Å]           | $\gamma$ [deg]    |                    | T     | H | P   |
| LiCd <sub>2</sub> | -                         | -       | -              | 6.00    | 9.16               | 40.2           | -       | -                 | -                 | 2.170              | 2.316 | - | 0.0 |
| LiHg <sub>2</sub> | -                         | -       | -              | 6.35    | 9.05               | 44.4           | -       | -                 | -                 | 1.491              | 1.549 | - | 0.0 |

Table 4: List of I-XIII

| species           | Initial structure indices | space group                              |                                              |                                          | lattice parameters |       |       |                |       |       | relative energy |                | spin moment       |                   |     |     |     |
|-------------------|---------------------------|------------------------------------------|----------------------------------------------|------------------------------------------|--------------------|-------|-------|----------------|-------|-------|-----------------|----------------|-------------------|-------------------|-----|-----|-----|
|                   |                           | T                                        | H                                            | P                                        | a [Å]              | b [Å] | c [Å] | $\gamma$ [deg] | a [Å] | b [Å] | c [Å]           | $\gamma$ [deg] | $\Delta E_1$ [eV] | $\Delta E_2$ [eV] | T   | H   | P   |
| LiAl <sub>2</sub> | HTX                       | <i>P</i> 3 <i>m</i> 1(164)               | <i>P</i> 6 <i>m</i> 2(187)                   | —                                        | 5.46               | 5.45  | 59.9  | 5.45           | 5.45  | 60.0  | —               | —              | 0.046             | 3.644             | 0.0 | 0.0 | —   |
| LiIn <sub>2</sub> | HXX                       | —                                        | <i>P</i> 4/ <i>m</i> <i>m</i> <i>m</i> (123) | —                                        | —                  | —     | —     | 6.58           | 9.07  | 43.7  | —               | —              | 1.741             | 2.532             | —   | 0.0 | —   |
| CsAl <sub>2</sub> | PTX                       | <i>C</i> <i>m</i> <i>m</i> <i>m</i> (65) | —                                            | <i>C</i> <i>m</i> <i>m</i> <i>e</i> (67) | 15.07              | 15.07 | 36.6  | —              | —     | —     | —               | —              | 0.159             | 6.625             | 0.0 | —   | 0.0 |
| CsIn <sub>2</sub> | HTP                       | <i>C</i> 2/ <i>m</i> (12)                | <i>P</i> 1(1)                                | <i>C</i> <i>m</i> <i>m</i> <i>m</i> (65) | 15.03              | 15.01 | 41.2  | 13.63          | 12.06 | 43.9  | 15.17           | 15.15          | 0.504             | 0.543             | 0.0 | 0.0 | 0.0 |
| CsTl <sub>2</sub> | TPX                       | <i>C</i> 2/ <i>m</i> (12)                | —                                            | <i>P</i> 2 <sub>1</sub> / <i>m</i> (11)  | 15.60              | 15.58 | 41.9  | —              | —     | —     | 15.61           | 15.60          | 0.041             | 4.172             | 0.0 | —   | 0.0 |

Table 5: List of I-XIV

| species           | Initial structure indices | space group   |               |               | lattice parameters |       |       |                |       |       | relative energy |                | spin moment       |                   |     |     |     |
|-------------------|---------------------------|---------------|---------------|---------------|--------------------|-------|-------|----------------|-------|-------|-----------------|----------------|-------------------|-------------------|-----|-----|-----|
|                   |                           | T             | H             | P             | a [Å]              | b [Å] | c [Å] | $\gamma$ [deg] | a [Å] | b [Å] | c [Å]           | $\gamma$ [deg] | $\Delta E_1$ [eV] | $\Delta E_2$ [eV] | T   | H   | P   |
| LiSn <sub>2</sub> | HXX                       | -             | $P4/mmm(123)$ | -             | -                  | -     | -     | 8.75           | 6.47  | 42.0  | -               | -              | 3.741             | 3.823             | -   | 0.0 | -   |
| NaSi <sub>2</sub> | TPX                       | $Cmmm(65)$    | -             | $Cmmm(65)$    | 12.29              | 12.29 | 36.3  | -              | -     | -     | 11.82           | 11.81          | 0.281             | 6.475             | 0.0 | -   | 0.0 |
| NaGe <sub>2</sub> | HXX                       | -             | $Cmme(67)$    | -             | -                  | -     | -     | 11.17          | 10.02 | 25.7  | -               | -              | 2.678             | 3.000             | -   | 0.0 | -   |
| KSi <sub>2</sub>  | PXX                       | -             | -             | -             | -                  | -     | -     | -              | -     | -     | 11.24           | 11.25          | 3.311             | 9.007             | -   | -   | 0.0 |
| KSn <sub>2</sub>  | PXX                       | -             | -             | $P\bar{1}(2)$ | -                  | -     | -     | -              | -     | -     | 12.42           | 12.46          | 1.599             | 6.654             | -   | -   | 0.0 |
| RbGe <sub>2</sub> | PXX                       | -             | -             | $P2/c(13)$    | -                  | -     | -     | -              | -     | -     | 12.98           | 11.83          | 0.890             | 6.183             | -   | -   | 0.0 |
| CsPb <sub>2</sub> | TPX                       | $P\bar{1}(2)$ | -             | $Cmmm(65)$    | 15.50              | 15.51 | 37.4  | -              | -     | -     | 15.45           | 15.45          | 0.152             | 4.817             | 0.0 | -   | 0.0 |

Table 6: List of I-XV

| species           | Initial structure indices |                                      | space group                          |                     | lattice parameters |       |       |                |       |       | relative energy |                | spin moment       |                   |      |      |      |
|-------------------|---------------------------|--------------------------------------|--------------------------------------|---------------------|--------------------|-------|-------|----------------|-------|-------|-----------------|----------------|-------------------|-------------------|------|------|------|
|                   | T                         | H                                    | H                                    | P                   | a [Å]              | b [Å] | c [Å] | $\gamma$ [deg] | a [Å] | b [Å] | c [Å]           | $\gamma$ [deg] | $\Delta E_1$ [eV] | $\Delta E_2$ [eV] | T    | H    | P    |
| LiBi <sub>2</sub> | HXX                       | —                                    | <i>Pmma</i> (51)                     | —                   | —                  | —     | —     | —              | 10.80 | 8.20  | 39.4            | —              | 1.327             | 1.585             | —    | —    | —    |
| NaN <sub>2</sub>  | THP                       | <i>P<math>\bar{3}m</math>1</i> (164) | <i>P<math>\bar{6}m</math>2</i> (187) | <i>Cmmm</i> (65)    | 8.21               | 8.27  | 59.1  | 56.0           | 7.59  | 7.59  | 56.0            | 44.8           | 0.466             | 0.542             | 20.0 | 20.0 | 20.0 |
| KN <sub>2</sub>   | TPX                       | <i>P<math>\bar{3}m</math>1</i> (164) | —                                    | <i>P6/mmm</i> (191) | 9.79               | 10.30 | 58.5  | —              | —     | —     | —               | 61.7           | 0.006             | 1.103             | 20.0 | —    | 20.0 |
| KBi <sub>2</sub>  | HXX                       | —                                    | <i>P2/c</i> (13)                     | —                   | —                  | —     | —     | —              | 12.35 | 14.81 | 29.2            | —              | 1.424             | 3.286             | —    | —    | —    |
| RbN <sub>2</sub>  | TPX                       | <i>P2/c</i> (13)                     | —                                    | <i>P6/mmm</i> (191) | 10.37              | 10.37 | 57.5  | —              | —     | —     | —               | 58.1           | 0.029             | 0.851             | 20.0 | —    | 20.0 |
| CsN <sub>2</sub>  | TPH                       | <i>P2/c</i> (13)                     | <i>Amma</i> 2(38)                    | <i>Pmma</i> (51)    | 10.96              | 10.42 | 61.7  | 55.0           | 10.37 | 10.34 | 55.0            | 57.8           | 0.169             | 0.689             | 20.0 | 20.0 | 20.0 |
| CsBi <sub>2</sub> | TXX                       | <i>C2/m</i> (12)                     | —                                    | —                   | 15.08              | 15.10 | 35.0  | —              | —     | —     | —               | —              | 1.192             | 4.126             | 0.0  | —    | —    |

Table 7: List of I-XVI

| species           | Initial structure indices | space group |   | lattice parameters |       |      |   |       |       | relative energy   |                   | spin moment |     |   |     |
|-------------------|---------------------------|-------------|---|--------------------|-------|------|---|-------|-------|-------------------|-------------------|-------------|-----|---|-----|
|                   |                           | T           | H | T                  | H     | T    | H | T     | H     | $\Delta E_1$ [eV] | $\Delta E_2$ [eV] | T           | H   | P |     |
| KSe <sub>2</sub>  | TPX                       | $P1(2)$     | - | 10.37              | 12.11 | 38.8 | - | 7.57  | 12.14 | 57.7              | 0.016             | 1.904       | 0.0 | - | 0.0 |
| KSe <sub>2</sub>  | PTX                       | $C2/m(12)$  | - | 12.40              | 12.43 | 41.7 | - | 12.07 | 10.58 | 41.8              | 0.400             | 1.789       | 0.0 | - | 0.0 |
| RbS <sub>2</sub>  | TPX                       | $P1(2)$     | - | 10.76              | 12.97 | 37.0 | - | 8.51  | 11.35 | 68.2              | 0.082             | 1.896       | 0.0 | - | 0.0 |
| RbSe <sub>2</sub> | PXX                       | -           | - | -                  | -     | -    | - | 10.60 | 13.06 | 36.9              | 0.841             | 2.222       | -   | - | 0.0 |
| CsS <sub>2</sub>  | PTX                       | $C2/m(12)$  | - | 13.71              | 13.70 | 40.2 | - | 11.90 | 12.37 | 39.3              | 0.598             | 1.834       | 0.0 | - | 0.0 |
| CsTe <sub>2</sub> | TPX                       | $C2/m(12)$  | - | 14.54              | 14.54 | 41.5 | - | 14.33 | 14.36 | 45.4              | 0.384             | 1.809       | 0.0 | - | 0.0 |



Table 8: List of I-XVII

| species           | Initial structure indices | space group   |                   |            | lattice parameters |       |       |                |       |       | relative energy |                | spin moment       |                   |     |     |   |     |
|-------------------|---------------------------|---------------|-------------------|------------|--------------------|-------|-------|----------------|-------|-------|-----------------|----------------|-------------------|-------------------|-----|-----|---|-----|
|                   |                           | T             | H                 | P          | a [Å]              | b [Å] | c [Å] | $\gamma$ [deg] | a [Å] | b [Å] | c [Å]           | $\gamma$ [deg] | $\Delta E_1$ [eV] | $\Delta E_2$ [eV] | T   | H   | P |     |
| LiCl <sub>2</sub> | PXX                       | —             | —                 | $P2/m(10)$ | —                  | —     | —     | —              | 9.13  | 11.15 | —               | 55.1           | 1.509             | 1.725             | —   | —   | — | 0.0 |
| NaCl <sub>2</sub> | PTX                       | $C2/m(12)$    | —                 | $P1(1)$    | 8.40               | 10.16 | —     | 51.8           | 12.18 | 10.56 | —               | 43.9           | 0.731             | 0.955             | 4.0 | —   | — | 2.0 |
| NaBr <sub>2</sub> | PXX                       | —             | —                 | $P2/m(10)$ | —                  | —     | —     | —              | 13.42 | 12.62 | —               | 45.0           | 1.067             | 1.295             | —   | —   | — | 0.0 |
| NaI <sub>2</sub>  | PXX                       | —             | —                 | $P1(2)$    | —                  | —     | —     | —              | 10.89 | 14.27 | —               | 64.5           | 0.969             | 1.287             | —   | —   | — | 0.0 |
| KF <sub>2</sub>   | THX                       | $P4mm(99)$    | $P\bar{6}m2(187)$ | —          | 7.36               | 10.45 | —     | 44.6           | 8.83  | 8.81  | —               | 56.8           | 0.434             | 1.186             | 4.0 | 4.0 | — | —   |
| KCl <sub>2</sub>  | THX                       | $P4/mmm(123)$ | $P6m2(187)$       | —          | 8.54               | 12.06 | —     | 45.0           | 10.13 | 10.20 | —               | 57.7           | 0.294             | 1.368             | 4.0 | 4.0 | — | —   |
| KBr <sub>2</sub>  | PTX                       | $P4/mmm(123)$ | —                 | $P2/m(10)$ | 9.94               | 9.94  | —     | 53.0           | —     | —     | —               | —              | 0.683             | 1.014             | 4.0 | —   | — | 0.0 |
| KI <sub>2</sub>   | TPH                       | $P2/c(13)$    | $Am2(38)$         | $P2/m(10)$ | 10.94              | 10.95 | —     | 53.3           | 11.37 | 11.37 | —               | 56.3           | 0.171             | 0.227             | 4.0 | 4.0 | — | 0.0 |
| RbF <sub>2</sub>  | THX                       | $P4/mmm(123)$ | $P6m2(187)$       | —          | 7.81               | 11.09 | —     | 44.7           | 9.37  | 9.36  | —               | 57.0           | 0.508             | 1.140             | 4.0 | 4.0 | — | —   |
| RbCl <sub>2</sub> | THX                       | $P4/mmm(123)$ | $P6m2(187)$       | —          | 8.99               | 12.73 | —     | 45.1           | 10.82 | 10.87 | —               | 56.7           | 0.349             | 1.122             | 4.0 | 4.0 | — | —   |
| RbBr <sub>2</sub> | THX                       | $P4/mmm(123)$ | $P\bar{6}m2(187)$ | —          | 9.35               | 13.21 | —     | 44.9           | 11.21 | 11.16 | —               | 57.6           | 0.346             | 1.251             | 4.0 | 4.0 | — | —   |
| RbI <sub>2</sub>  | PTX                       | $P4/mmm(123)$ | —                 | $P2/m(10)$ | 9.83               | 13.90 | —     | 45.4           | —     | —     | —               | —              | 0.748             | 1.166             | 4.0 | —   | — | 0.0 |
| CsF <sub>2</sub>  | HPX                       | —             | $Am2(38)$         | $Cmmm(65)$ | —                  | —     | —     | —              | 10.12 | 10.13 | —               | 55.1           | 0.512             | 1.732             | —   | 4.0 | — | 4.0 |
| CsBr <sub>2</sub> | TXX                       | $P4/mmm(123)$ | —                 | —          | 9.84               | 13.95 | —     | 45.2           | —     | —     | —               | —              | 0.919             | 1.134             | 4.0 | —   | — | 0.0 |
| CsI <sub>2</sub>  | PTX                       | $P4/mmm(123)$ | —                 | $P1(2)$    | 10.42              | 14.74 | —     | 44.9           | —     | —     | —               | —              | 0.796             | 1.746             | 4.0 | —   | — | 0.0 |

Table 9: List of I-TM

| species           | Initial structure indices | space group |               | lattice parameters |       |      |   |   |   | relative energy   |                   | spin moment |       |   |   |      |
|-------------------|---------------------------|-------------|---------------|--------------------|-------|------|---|---|---|-------------------|-------------------|-------------|-------|---|---|------|
|                   |                           | T           | H             | T                  | H     | T    | H | T | H | $\Delta E_1$ [eV] | $\Delta E_2$ [eV] | T           | H     | P |   |      |
| LiSc <sub>2</sub> | PXX                       | -           | -             | -                  | -     | -    | - | - | - | 7.23              | 7.23              | 3.306       | 3.363 | - | - | 0.0  |
| LiMn <sub>2</sub> | HXX                       | -           | -             | -                  | -     | -    | - | - | - | 7.75              | 10.43             | 2.707       | 5.736 | - | - | 32.3 |
| LiAg <sub>2</sub> | HXX                       | -           | $P\bar{1}(2)$ | -                  | -     | -    | - | - | - | 5.83              | 5.84              | 3.253       | 3.264 | - | - | 0.0  |
| NaAu <sub>2</sub> | HXX                       | -           | $P6m2(187)$   | -                  | -     | -    | - | - | - | 5.81              | 9.01              | 1.783       | 1.787 | - | - | 0.0  |
| KAg <sub>2</sub>  | HXX                       | -           | $Cmmm(65)$    | -                  | -     | -    | - | - | - | 13.20             | 12.24             | 2.265       | 2.295 | - | - | 0.0  |
| RbY <sub>2</sub>  | HXX                       | -           | $Acm2(39)$    | -                  | -     | -    | - | - | - | 14.19             | 15.63             | 7.531       | 7.609 | - | - | 0.0  |
| RbAu <sub>2</sub> | P $\bar{1}X$              | -           | $Cmm2(35)$    | -                  | -     | -    | - | - | - | 13.37             | 13.42             | 0.003       | 4.908 | - | - | 0.0  |
| CsCr <sub>2</sub> | P $\bar{1}X$              | -           | -             | 14.19              | 14.18 | 46.9 | - | - | - | 14.19             | 14.19             | 0.016       | 3.209 | - | - | 42.1 |
| CsY <sub>2</sub>  | P $\bar{1}X$              | -           | $Cmmm(65)$    | 15.79              | 15.78 | 46.0 | - | - | - | 15.56             | 15.55             | 0.040       | 4.966 | - | - | 13.4 |
| CsAg <sub>2</sub> | P $\bar{1}X$              | -           | $C2/m(12)$    | 14.23              | 14.22 | 44.8 | - | - | - | 14.23             | 14.25             | 0.028       | 3.849 | - | - | 0.0  |
| CsAu <sub>2</sub> | P $\bar{1}X$              | -           | $Cmmm(65)$    | 13.95              | 13.95 | 45.0 | - | - | - | 13.95             | 13.96             | 0.002       | 4.896 | - | - | 0.0  |

Table 10: List of II-I

| species           | Initial structure indices |       | space group |       | lattice parameters |       |       |       |       |       | relative energy |              | spin moment           |                       |     |     |
|-------------------|---------------------------|-------|-------------|-------|--------------------|-------|-------|-------|-------|-------|-----------------|--------------|-----------------------|-----------------------|-----|-----|
|                   | T                         | H     | H           | P     | T                  |       | H     |       | P     |       | $\Delta E_1$    | $\Delta E_2$ | T                     | H                     | P   |     |
|                   | a [Å]                     | b [Å] | a [Å]       | b [Å] | a [Å]              | b [Å] | a [Å] | b [Å] | a [Å] | b [Å] | $\Delta E_1$    | $\Delta E_2$ | [ $\mu_B$ /unit cell] | [ $\mu_B$ /unit cell] |     |     |
| BeK <sub>2</sub>  | -                         | -     | -           | -     | -                  | -     | -     | -     | -     | -     | 2.140           | 4.508        | -                     | -                     | -   | 0.0 |
| BeRb <sub>2</sub> | $P\bar{3}m1(164)$         | -     | $P1(2)$     | -     | 10.74              | 10.74 | 56.9  | 10.59 | 10.59 | 49.0  | 0.542           | 2.225        | 0.0                   | 0.0                   | -   | -   |
| BeCs <sub>2</sub> | $P3m1(164)$               | -     | -           | -     | 10.99              | 10.99 | 59.2  | 11.24 | 11.25 | 50.2  | 0.787           | 2.815        | 0.0                   | 0.0                   | -   | -   |
| CaK <sub>2</sub>  | HXX                       | -     | $P2/m(10)$  | -     | -                  | -     | -     | 8.35  | 13.97 | 33.5  | -               | 4.431        | 4.483                 | -                     | 0.0 | -   |
| CaRb <sub>2</sub> | HXX                       | -     | $Cmmm(65)$  | -     | -                  | -     | -     | 13.13 | 8.80  | 41.5  | -               | 3.612        | 3.733                 | -                     | 0.0 | -   |
| SrK <sub>2</sub>  | HXX                       | -     | $Cmmm(65)$  | -     | -                  | -     | -     | 14.81 | 8.76  | 32.3  | -               | 4.385        | 4.424                 | -                     | 0.0 | -   |
| SrCs <sub>2</sub> | HXX                       | -     | $P2/m(10)$  | -     | -                  | -     | -     | 9.91  | 15.60 | 36.5  | -               | 3.320        | 3.326                 | -                     | 0.0 | -   |
| BaK <sub>2</sub>  | HXX                       | -     | $Cmmm(65)$  | -     | -                  | -     | -     | 15.14 | 8.97  | 32.4  | -               | 5.288        | 5.295                 | -                     | 0.0 | -   |
| BaRb <sub>2</sub> | HXX                       | -     | $Cmmm(65)$  | -     | -                  | -     | -     | 9.25  | 11.07 | 52.8  | -               | 4.754        | 4.775                 | -                     | 0.0 | -   |
| BaCs <sub>2</sub> | HXX                       | -     | $Amm2(38)$  | -     | -                  | -     | -     | 15.57 | 15.52 | 35.9  | -               | 1.937        | 2.001                 | -                     | 0.0 | -   |

Table 11: List of II-II

| species           | Initial structure indices | space group       |                   | lattice parameters |       |       |                |       |       | relative energy |                | spin moment       |                   |     |     |     |
|-------------------|---------------------------|-------------------|-------------------|--------------------|-------|-------|----------------|-------|-------|-----------------|----------------|-------------------|-------------------|-----|-----|-----|
|                   |                           | T                 | H                 | a [Å]              | b [Å] | c [Å] | $\gamma$ [deg] | a [Å] | b [Å] | c [Å]           | $\gamma$ [deg] | $\Delta E_1$ [eV] | $\Delta E_2$ [eV] | T   | H   | P   |
| BeBe <sub>2</sub> | HfX                       | <i>Cmmm</i> (65)  | <i>P6m2</i> (187) | 4.24               | 4.73  | 56.1  | 4.39           | 4.39  | 120.0 | —               | —              | 0.167             | 6.772             | 0.0 | 0.0 | —   |
| BeMg <sub>2</sub> | THX                       | <i>Am2</i> (38)   | <i>Am2</i> (38)   | 6.15               | 7.68  | 52.1  | 6.11           | 6.31  | 60.8  | —               | —              | 0.494             | 6.478             | 0.0 | 0.0 | —   |
| BeCa <sub>2</sub> | PfTH                      | <i>P3m1</i> (164) | <i>P6m2</i> (187) | 8.62               | 8.62  | 58.8  | 7.77           | 7.76  | 59.9  | 8.32            | 8.33           | 0.020             | 0.231             | 0.0 | 0.0 | 0.0 |
| BeBa <sub>2</sub> | PfTH                      | <i>P3m1</i> (164) | <i>P6m2</i> (187) | 10.03              | 10.03 | 57.0  | 8.97           | 8.96  | 58.2  | 9.87            | 9.85           | 0.007             | 0.278             | 0.0 | 0.0 | 0.0 |
| MgBa <sub>2</sub> | PTH                       | <i>C2/m</i> (12)  | <i>Am2</i> (38)   | 11.05              | 8.90  | 51.5  | 8.84           | 8.86  | 59.6  | 12.04           | 11.07          | 0.101             | 0.322             | 0.0 | 0.0 | 0.0 |
| CaSr <sub>2</sub> | HXX                       | —                 | <i>Cmmm</i> (65)  | —                  | —     | —     | 8.12           | 11.93 | 42.7  | —               | —              | 5.908             | 6.058             | —   | 0.0 | —   |
| CaBa <sub>2</sub> | HXX                       | —                 | <i>Cmmm</i> (65)  | —                  | —     | —     | 8.41           | 13.79 | 34.9  | —               | —              | 5.809             | 6.597             | —   | 0.0 | —   |
| SrCa <sub>2</sub> | HXX                       | —                 | <i>Cmmm</i> (65)  | —                  | —     | —     | 7.90           | 13.16 | 34.6  | —               | —              | 6.178             | 6.180             | —   | 0.0 | —   |
| SrSr <sub>2</sub> | HXX                       | —                 | <i>Am2</i> (38)   | —                  | —     | —     | 8.55           | 14.45 | 31.6  | —               | —              | 6.433             | 6.440             | —   | 0.0 | —   |
| SrBa <sub>2</sub> | HXX                       | —                 | <i>Cmmm</i> (65)  | —                  | —     | —     | 8.63           | 14.42 | 33.6  | —               | —              | 6.319             | 6.612             | —   | 0.0 | —   |
| BaCa <sub>2</sub> | HXX                       | —                 | <i>Am2</i> (38)   | —                  | —     | —     | 13.20          | 13.23 | 34.5  | —               | —              | 1.951             | 1.981             | —   | 0.0 | —   |
| BaSr <sub>2</sub> | HXX                       | —                 | <i>Am2</i> (38)   | —                  | —     | —     | 13.70          | 13.69 | 35.6  | —               | —              | 1.993             | 2.024             | —   | 0.0 | —   |
| BaBa <sub>2</sub> | HXX                       | —                 | <i>Am2</i> (38)   | —                  | —     | —     | 14.13          | 14.12 | 34.9  | —               | —              | 2.303             | 2.377             | —   | 0.0 | —   |

Table 12: List of II-XII

| species           | Initial structure indices | space group      |                  | lattice parameters  |       |       |       |                |                | relative energy |                   | spin moment       |      |       |       |     |     |     |
|-------------------|---------------------------|------------------|------------------|---------------------|-------|-------|-------|----------------|----------------|-----------------|-------------------|-------------------|------|-------|-------|-----|-----|-----|
|                   |                           | T                | H                | P                   | a [Å] | b [Å] | c [Å] | $\gamma$ [deg] | $\gamma$ [deg] | $\gamma$ [deg]  | $\Delta E_1$ [eV] | $\Delta E_2$ [eV] | T    | H     | P     |     |     |     |
| CaHg <sub>2</sub> | HPT                       | <i>C2/m</i> (12) | <i>Amm2</i> (38) | <i>P6/mmm</i> (191) | 11.48 | 11.50 | 37.9  | 10.67          | 10.75          | 41.0            | 10.98             | 10.99             | 59.6 | 0.088 | 0.094 | 0.0 | 0.0 | 0.0 |
| SrCd <sub>2</sub> | HXX                       | -                | <i>P2/c</i> (13) | -                   | -     | -     | 8.32  | 11.91          | 43.6           | -               | -                 | -                 | -    | 1.436 | 2.675 | -   | 0.0 | -   |
| SrHg <sub>2</sub> | HXX                       | -                | <i>Pmmm</i> (59) | -                   | -     | -     | 9.48  | 12.86          | 41.3           | -               | -                 | -                 | -    | 1.553 | 1.834 | -   | 0.0 | -   |

Table 13: List of II-XIII

| species           | Initial structure indices | space group      |                  |                   | lattice parameters |       |       |                |       |       | relative energy |                | spin moment       |                   |     |     |     |
|-------------------|---------------------------|------------------|------------------|-------------------|--------------------|-------|-------|----------------|-------|-------|-----------------|----------------|-------------------|-------------------|-----|-----|-----|
|                   |                           | T                | H                | P                 | a [Å]              | b [Å] | c [Å] | $\gamma$ [deg] | a [Å] | b [Å] | c [Å]           | $\gamma$ [deg] | $\Delta E_1$ [eV] | $\Delta E_2$ [eV] | T   | H   | P   |
| BeB <sub>2</sub>  | PXX                       | -                | -                | <i>Pmnm</i> (59)  | -                  | -     | -     | -              | 6.03  | 6.01  | 60.1            | 1.909          | 2.423             | -                 | -   | -   | 0.0 |
| BeAl <sub>2</sub> | HXX                       | -                | <i>Pmm2</i> (25) | -                 | 5.30               | 5.45  | 59.0  | -              | -     | -     | -               | 1.429          | 3.864             | -                 | -   | 0.0 | -   |
| BeIn <sub>2</sub> | HTX                       | <i>C2/m</i> (12) | <i>P1</i> (1)    | -                 | 6.90               | 7.89  | 50.3  | 61.2           | -     | -     | -               | 0.494          | 6.038             | 0.0               | 0.0 | -   | -   |
| BeTl <sub>2</sub> | HTX                       | <i>P1</i> (1)    | <i>P1</i> (1)    | -                 | 6.29               | 8.79  | 48.2  | 59.0           | -     | -     | -               | 0.040          | 4.767             | 0.0               | 0.0 | -   | -   |
| MgIn <sub>2</sub> | HXX                       | -                | <i>Pmmm</i> (47) | -                 | 10.52              | 8.51  | 35.3  | -              | -     | -     | -               | 2.379          | 2.923             | -                 | -   | 0.0 | -   |
| CaB <sub>2</sub>  | TPX                       | <i>Pmma</i> (51) | -                | <i>Pmma</i> (51)  | 8.29               | 10.25 | 35.9  | -              | 8.26  | 10.19 | 36.0            | 0.005          | 15.069            | 0.0               | -   | 0.0 | -   |
| CaTl <sub>2</sub> | HXX                       | -                | <i>P2/c</i> (13) | -                 | 8.22               | 12.19 | 36.0  | -              | -     | -     | -               | 2.239          | 2.264             | -                 | -   | 0.0 | -   |
| SrB <sub>2</sub>  | PTX                       | <i>Cmmm</i> (65) | -                | <i>Cmmm</i> (65)  | 10.86              | 10.88 | 34.3  | -              | 10.88 | 10.87 | 34.2            | 0.005          | 12.283            | 0.0               | -   | 0.0 | -   |
| SrAl <sub>2</sub> | PXX                       | -                | -                | <i>P6mm</i> (183) | -                  | -     | -     | -              | 9.20  | 9.20  | 60.0            | 3.037          | 8.347             | -                 | -   | 0.0 | -   |
| SrIn <sub>2</sub> | HXX                       | -                | <i>C2/m</i> (12) | -                 | 12.52              | 11.36 | 24.8  | -              | -     | -     | -               | 3.379          | 4.365             | -                 | -   | 0.0 | -   |
| SrTl <sub>2</sub> | HXX                       | -                | <i>Pmma</i> (53) | -                 | 8.22               | 11.78 | 45.1  | -              | -     | -     | -               | 2.209          | 2.225             | -                 | -   | 0.0 | -   |
| BaB <sub>2</sub>  | PXX                       | -                | -                | <i>Pmma</i> (51)  | -                  | -     | -     | -              | 8.97  | 10.87 | 34.1            | 2.298          | 16.736            | -                 | -   | 0.0 | -   |
| BaAl <sub>2</sub> | PXX                       | -                | -                | <i>Cmm2</i> (35)  | -                  | -     | -     | -              | 8.48  | 8.48  | 58.3            | 1.492          | 9.809             | -                 | -   | 0.0 | -   |

Table 14: List of II-XIV

| species           | Initial structure indices | space group       |            | lattice parameters |       |       |                |       |       | relative energy |       | spin moment       |                   |     |     |     |
|-------------------|---------------------------|-------------------|------------|--------------------|-------|-------|----------------|-------|-------|-----------------|-------|-------------------|-------------------|-----|-----|-----|
|                   |                           | T                 | H          | a [Å]              | b [Å] | c [Å] | $\gamma$ [deg] | a [Å] | b [Å] | a [Å]           | b [Å] | $\Delta E_1$ [eV] | $\Delta E_2$ [eV] | T   | H   | P   |
| BeSi <sub>2</sub> | HTX                       | $C2/m(12)$        | $Ammm(38)$ | 7.49               | 7.49  | 39.3  | 39.7           | 7.47  | 7.46  | —               | —     | 0.581             | 4.407             | 0.0 | 0.0 | —   |
| BeGe <sub>2</sub> | HTX                       | $P\bar{3}m1(164)$ | $Ammm(38)$ | 7.45               | 7.45  | 59.9  | 41.5           | 7.70  | 7.69  | —               | —     | 0.675             | 1.290             | 0.0 | 0.0 | —   |
| BePb <sub>2</sub> | P $\bar{3}m1(164)$        | $P\bar{3}m1(164)$ | $Ammm(38)$ | 8.34               | 8.34  | 59.2  | 52.1           | 7.87  | 7.87  | 8.25            | 8.25  | 0.012             | 0.416             | 0.0 | 0.0 | 0.0 |
| MgSi <sub>2</sub> | HXX                       | —                 | $Pnma(51)$ | —                  | —     | —     | 38.3           | 9.92  | 7.60  | —               | —     | 1.732             | 2.165             | —   | 0.0 | —   |
| MgGe <sub>2</sub> | HXX                       | —                 | $Pnma(51)$ | —                  | —     | —     | 33.9           | 10.26 | 8.38  | —               | —     | 1.749             | 3.081             | —   | 0.0 | —   |
| MgSn <sub>2</sub> | HXX                       | —                 | $Ammm(38)$ | —                  | —     | —     | 37.1           | 9.89  | 9.95  | —               | —     | 1.742             | 2.456             | —   | 0.0 | —   |
| CaSi <sub>2</sub> | TPX                       | $C2/m(12)$        | —          | 11.52              | 11.52 | 39.0  | —              | —     | —     | 11.42           | 11.42 | 0.030             | 5.564             | 0.0 | 0.0 | 0.0 |
| CaGe <sub>2</sub> | TPX                       | $C2/m(12)$        | —          | 11.48              | 11.48 | 40.7  | —              | —     | —     | 11.27           | 11.27 | 0.007             | 4.591             | 0.0 | 0.0 | 0.0 |
| CaSn <sub>2</sub> | PTX                       | $C2/m(12)$        | —          | 11.94              | 11.94 | 44.0  | —              | —     | —     | 11.99           | 12.00 | 0.053             | 4.749             | 0.0 | 0.0 | 0.0 |
| SrC <sub>2</sub>  | PXX                       | —                 | —          | —                  | —     | —     | —              | —     | —     | 8.26            | 10.52 | 2.001             | 34.056            | —   | 0.0 | 0.0 |
| SrSi <sub>2</sub> | TPX                       | $C2/m(12)$        | —          | 12.31              | 12.31 | 37.3  | —              | —     | —     | 12.47           | 12.48 | 0.055             | 4.898             | 0.0 | 0.0 | 0.0 |
| SrGe <sub>2</sub> | TPX                       | $C2/m(12)$        | —          | 12.13              | 12.13 | 39.3  | —              | —     | —     | 12.45           | 12.45 | 0.256             | 4.014             | 0.0 | 0.0 | 0.0 |
| SrSn <sub>2</sub> | TPX                       | $C2/m(12)$        | —          | 12.68              | 12.68 | 42.2  | —              | —     | —     | 13.25           | 13.26 | 0.389             | 4.638             | 0.0 | 0.0 | 0.0 |
| SrPb <sub>2</sub> | TPX                       | $C2/m(12)$        | —          | 12.83              | 12.83 | 43.5  | —              | —     | —     | 12.72           | 12.73 | 0.402             | 3.960             | 0.0 | 0.0 | 0.0 |
| BaC <sub>2</sub>  | PXX                       | —                 | —          | —                  | —     | —     | —              | —     | —     | 8.72            | 11.72 | 24.445            | 34.444            | —   | 0.0 | 0.0 |
| BaSi <sub>2</sub> | PTX                       | $P2/c(13)$        | —          | 12.20              | 12.21 | 37.3  | —              | —     | —     | 12.25           | 12.29 | 0.017             | 5.115             | 0.0 | 0.0 | 0.0 |
| BaGe <sub>2</sub> | TPX                       | $P\bar{1}(2)$     | —          | 12.23              | 12.08 | 38.8  | —              | —     | —     | 12.26           | 12.47 | 0.066             | 4.080             | 0.0 | 0.0 | 0.0 |
| BaSn <sub>2</sub> | HXX                       | —                 | $Pc(7)$    | —                  | —     | —     | 75.0           | 8.68  | 9.40  | —               | —     | 1.507             | 1.720             | —   | 0.0 | —   |
| BaPb <sub>2</sub> | TPX                       | $C2/m(12)$        | —          | 13.51              | 13.52 | 42.2  | —              | —     | —     | 13.58           | 13.58 | 0.021             | 4.013             | 0.0 | 0.0 | 0.0 |

Table 15: List of II-XV

| species           | Initial structure indices | space group      |                    | lattice parameters |       |       |                |       |       | relative energy   |                   | spin moment |     |     |     |
|-------------------|---------------------------|------------------|--------------------|--------------------|-------|-------|----------------|-------|-------|-------------------|-------------------|-------------|-----|-----|-----|
|                   |                           | T                | H                  | a [Å]              | b [Å] | c [Å] | $\gamma$ [deg] | a [Å] | b [Å] | $\Delta E_1$ [eV] | $\Delta E_2$ [eV] | T           | H   | P   |     |
| BeP <sub>2</sub>  | HXX                       | -                | <i>P6mm2</i> (187) | -                  | -     | -     | -              | 6.79  | 6.79  | 60.0              | 1.270             | 1.864       | -   | 0.0 | -   |
| BeSb <sub>2</sub> | HXX                       | -                | <i>P6mm2</i> (187) | -                  | -     | -     | -              | 7.71  | 7.71  | 59.2              | 1.290             | 1.822       | -   | 0.0 | -   |
| BeBi <sub>2</sub> | HPX                       | -                | <i>P6mm2</i> (187) | -                  | -     | -     | -              | 7.90  | 7.89  | 59.7              | 0.342             | 1.070       | -   | 0.0 | 0.0 |
| CaN <sub>2</sub>  | PXX                       | -                | -                  | -                  | -     | -     | -              | -     | -     | -                 | 2.686             | 21.815      | -   | -   | 0.0 |
| CaSb <sub>2</sub> | HXX                       | -                | <i>Cmmm</i> (65)   | -                  | -     | -     | -              | 9.52  | 11.96 | 36.0              | 1.402             | 4.121       | -   | 0.0 | -   |
| CaBi <sub>2</sub> | HXX                       | -                | <i>Pmmm</i> (47)   | -                  | -     | -     | -              | 12.04 | 9.66  | 36.2              | 1.884             | 1.930       | -   | 0.0 | -   |
| SrN <sub>2</sub>  | PXX                       | -                | -                  | -                  | -     | -     | -              | -     | -     | -                 | 1.588             | 21.284      | -   | 0.0 | -   |
| SrP <sub>2</sub>  | TPX                       | <i>C2/m</i> (12) | -                  | 11.14              | 11.14 | 37.4  | -              | -     | -     | -                 | 0.600             | 2.113       | 0.0 | 0.0 | -   |
| SrSb <sub>2</sub> | HXX                       | -                | <i>Cmmm</i> (65)   | -                  | -     | -     | -              | 10.03 | 12.61 | 36.5              | 1.128             | 3.870       | -   | 0.0 | -   |
| SrBi <sub>2</sub> | HXX                       | -                | <i>Pmma</i> (51)   | -                  | -     | -     | -              | 10.24 | 12.70 | 35.8              | 1.319             | 1.366       | -   | 0.0 | -   |
| BaN <sub>2</sub>  | HXX                       | -                | <i>P6mm2</i> (187) | -                  | -     | -     | -              | 9.18  | 9.23  | 60.7              | 19.750            | 19.780      | -   | 3.8 | -   |
| BaP <sub>2</sub>  | TXX                       | <i>P1</i> (2)    | -                  | 11.20              | 10.66 | 34.9  | -              | -     | -     | -                 | 1.981             | 3.218       | 0.0 | -   | -   |
| BaSb <sub>2</sub> | HXX                       | -                | <i>Cmmm</i> (65)   | -                  | -     | -     | -              | 10.96 | 13.78 | 34.8              | 2.519             | 4.322       | -   | 0.0 | -   |
| BaBi <sub>2</sub> | HXX                       | -                | <i>Pmma</i> (51)   | -                  | -     | -     | -              | 13.57 | 11.01 | 34.7              | 1.568             | 3.780       | -   | 0.0 | -   |



Table 16: List of II-XVI

| species           | Initial structure indices | space group |                                    |   | lattice parameters |       |       |                |       |       | relative energy |                | spin moment       |                   |     |     |     |
|-------------------|---------------------------|-------------|------------------------------------|---|--------------------|-------|-------|----------------|-------|-------|-----------------|----------------|-------------------|-------------------|-----|-----|-----|
|                   |                           | T           | H                                  | P | a [Å]              | b [Å] | c [Å] | $\gamma$ [deg] | a [Å] | b [Å] | c [Å]           | $\gamma$ [deg] | $\Delta E_1$ [eV] | $\Delta E_2$ [eV] | T   | H   | P   |
| BeO <sub>2</sub>  | HXX                       | -           | <i>P1</i> (1)                      | - | 5.58               | 5.74  | 60.2  | -              | -     | -     | -               | 1.771          | 1.878             | -                 | 2.0 | -   | -   |
| BeS <sub>2</sub>  | PHX                       | -           | <i>C2</i> (5)                      | - | 7.15               | 7.16  | 78.3  | -              | 8.85  | 6.88  | 51.6            | 0.065          | 3.706             | -                 | 0.0 | 0.0 | 0.0 |
| BeSe <sub>2</sub> | PXX                       | -           | -                                  | - | -                  | -     | -     | -              | 10.46 | 6.44  | 52.1            | 2.049          | 3.159             | -                 | -   | -   | -   |
| BeTe <sub>2</sub> | TPX                       | -           | -                                  | - | -                  | -     | -     | -              | 10.97 | 8.25  | 67.0            | 0.282          | 1.756             | 0.0               | -   | -   | -   |
| MgO <sub>2</sub>  | HPX                       | -           | <i>P</i> $\bar{6}$ <i>m2</i> (187) | - | 6.61               | 6.63  | 59.7  | -              | 7.91  | 5.99  | 47.3            | 0.056          | 4.414             | -                 | 0.0 | 0.0 | 0.0 |
| CaO <sub>2</sub>  | PHX                       | -           | <i>F</i> $\bar{6}$ <i>m2</i> (187) | - | 7.49               | 7.48  | 60.6  | -              | 6.41  | 7.17  | 63.4            | 0.615          | 7.585             | -                 | 0.0 | 0.0 | 0.0 |
| CaS <sub>2</sub>  | PHX                       | -           | <i>F</i> $\bar{6}$ <i>m2</i> (187) | - | 9.02               | 9.01  | 58.4  | -              | 8.58  | 7.66  | 63.3            | 0.388          | 7.064             | -                 | 0.0 | 0.0 | 0.0 |
| CaSe <sub>2</sub> | THX                       | -           | <i>P4</i> / <i>mmm</i> (123)       | - | 8.00               | 11.36 | 44.9  | -              | -     | -     | -               | 0.335          | 1.768             | 0.0               | 0.0 | -   | -   |
| CaTe <sub>2</sub> | THX                       | -           | <i>C2</i> / <i>m</i> (12)          | - | 11.55              | 9.01  | 49.8  | -              | -     | -     | -               | 0.410          | 2.140             | 0.0               | 0.0 | -   | -   |
| SrS <sub>2</sub>  | PXX                       | -           | -                                  | - | -                  | -     | -     | -              | 8.10  | 11.48 | 45.0            | 0.837          | 7.807             | -                 | 0.0 | -   | -   |
| SrSe <sub>2</sub> | HXX                       | -           | <i>P</i> $\bar{6}$ <i>m2</i> (187) | - | 9.99               | 9.99  | 57.9  | -              | 9.65  | 9.65  | 53.2            | 2.071          | 5.736             | -                 | 0.0 | -   | -   |
| BaS <sub>2</sub>  | PHX                       | -           | <i>F</i> $\bar{6}$ <i>m2</i> (187) | - | 10.15              | 10.14 | 60.1  | -              | 8.91  | 12.62 | 45.0            | 0.022          | 0.868             | 0.0               | -   | -   | -   |
| BaSe <sub>2</sub> | PTX                       | -           | -                                  | - | 8.90               | 12.61 | 45.0  | -              | 9.43  | 13.37 | 44.8            | 0.004          | 1.146             | 0.0               | -   | -   | -   |
| BaTe <sub>2</sub> | TPX                       | -           | <i>P4</i> / <i>mmm</i> (123)       | - | 9.43               | 13.37 | 44.8  | -              | -     | -     | -               | -              | -                 | 0.0               | -   | -   | -   |

Table 17: List of II-XVII

| species           | Initial structure indices | space group       |                   | lattice parameters |       |       |                |       |       | relative energy |                | spin moment       |                   |       |       |     |     |     |
|-------------------|---------------------------|-------------------|-------------------|--------------------|-------|-------|----------------|-------|-------|-----------------|----------------|-------------------|-------------------|-------|-------|-----|-----|-----|
|                   |                           | T                 | H                 | a [Å]              | b [Å] | c [Å] | $\gamma$ [deg] | a [Å] | b [Å] | c [Å]           | $\gamma$ [deg] | $\Delta E_1$ [eV] | $\Delta E_2$ [eV] | T     | H     | P   |     |     |
| BeCl <sub>2</sub> | PHX                       | —                 | <i>P4m2</i> (115) | —                  | —     | —     | —              | 6.68  | 6.68  | 86.6            | —              | 7.54              | 7.58              | 0.457 | 3.017 | —   | 0.0 | 0.0 |
| BeI <sub>2</sub>  | HXX                       | —                 | <i>C222</i> (21)  | —                  | —     | —     | —              | 7.77  | 10.22 | 49.1            | —              | —                 | —                 | 2.537 | 3.411 | —   | 0.0 | —   |
| MgF <sub>2</sub>  | PTX                       | <i>P3m1</i> (164) | —                 | 6.29               | 6.29  | 59.8  | —              | —     | —     | —               | —              | 6.28              | 6.29              | 0.003 | 3.879 | 0.0 | —   | 0.0 |
| MgCl <sub>2</sub> | PTX                       | <i>P3m1</i> (164) | —                 | 7.42               | 7.42  | 59.5  | —              | —     | —     | —               | —              | 7.43              | 7.43              | 0.049 | 2.430 | 0.0 | —   | 0.0 |
| MgBr <sub>2</sub> | TPX                       | <i>P3m1</i> (164) | —                 | 7.81               | 7.82  | 59.5  | —              | —     | —     | —               | —              | 7.81              | 7.82              | 0.005 | 2.072 | 0.0 | —   | 0.0 |
| MgI <sub>2</sub>  | THX                       | <i>P3m1</i> (164) | <i>P3m1</i> (164) | 8.44               | 8.45  | 59.5  | —              | 8.44  | 8.44  | 59.5            | —              | —                 | —                 | 0.002 | 1.141 | 0.0 | 0.0 | —   |
| CaF <sub>2</sub>  | PTX                       | <i>P3m1</i> (164) | —                 | 7.24               | 7.25  | 60.0  | —              | —     | —     | —               | —              | 7.24              | 7.24              | 0.028 | 3.153 | 0.0 | —   | 0.0 |
| CaCl <sub>2</sub> | PTX                       | <i>P3m1</i> (164) | —                 | 8.29               | 8.29  | 60.0  | —              | —     | —     | —               | —              | 8.29              | 8.29              | 0.001 | 1.980 | 0.0 | —   | 0.0 |
| CaBr <sub>2</sub> | PTX                       | <i>P3m1</i> (164) | —                 | 8.62               | 8.61  | 59.4  | —              | —     | —     | —               | —              | 8.55              | 8.55              | 0.005 | 1.548 | 0.0 | —   | 0.0 |
| CaI <sub>2</sub>  | PTX                       | <i>P3m1</i> (164) | —                 | 9.13               | 9.14  | 59.4  | —              | —     | —     | —               | —              | 9.07              | 9.08              | 0.005 | 1.259 | 0.0 | —   | 0.0 |
| SrF <sub>2</sub>  | TPX                       | <i>P3m1</i> (164) | —                 | 7.82               | 7.83  | 60.1  | —              | —     | —     | —               | —              | 7.81              | 7.82              | 0.004 | 2.693 | 0.0 | —   | 0.0 |
| SrCl <sub>2</sub> | PTX                       | <i>P3m1</i> (164) | —                 | 8.93               | 8.93  | 59.9  | —              | —     | —     | —               | —              | 8.92              | 8.92              | 0.001 | 1.839 | 0.0 | —   | 0.0 |
| SrBr <sub>2</sub> | PTX                       | <i>P3m1</i> (164) | —                 | 9.18               | 9.19  | 59.9  | —              | —     | —     | —               | —              | 9.17              | 9.17              | 0.001 | 1.447 | 0.0 | —   | 0.0 |
| SrI <sub>2</sub>  | PTX                       | <i>P3m1</i> (164) | —                 | 9.74               | 9.74  | 59.1  | —              | —     | —     | —               | —              | 9.61              | 9.61              | 0.010 | 1.111 | 0.0 | —   | 0.0 |
| BaF <sub>2</sub>  | TPX                       | <i>P3m1</i> (164) | —                 | 8.52               | 8.53  | 59.3  | —              | —     | —     | —               | —              | 8.09              | 8.53              | 0.025 | 2.175 | 0.0 | —   | 0.0 |
| BaCl <sub>2</sub> | TPX                       | <i>P3m1</i> (164) | —                 | 9.70               | 9.73  | 59.5  | —              | —     | —     | —               | —              | 9.55              | 9.31              | 0.213 | 1.705 | 0.0 | —   | 0.0 |
| BaBr <sub>2</sub> | PTX                       | <i>P3m1</i> (164) | —                 | 10.03              | 10.02 | 59.4  | —              | —     | —     | —               | —              | 9.92              | 9.91              | 0.009 | 1.318 | 0.0 | —   | 0.0 |
| BaI <sub>2</sub>  | PTX                       | <i>P3m1</i> (164) | —                 | 10.50              | 10.51 | 59.1  | —              | —     | —     | —               | —              | 10.35             | 10.34             | 0.012 | 0.973 | 0.0 | —   | 0.0 |

Table 18: List of II-TM

| species           | Initial structure indices | space group   |                   |              | lattice parameters |       |       |                |       |       | relative energy |                | spin moment       |                   |      |      |
|-------------------|---------------------------|---------------|-------------------|--------------|--------------------|-------|-------|----------------|-------|-------|-----------------|----------------|-------------------|-------------------|------|------|
|                   |                           | T             | H                 | P            | a [Å]              | b [Å] | c [Å] | $\gamma$ [deg] | a [Å] | b [Å] | c [Å]           | $\gamma$ [deg] | $\Delta E_1$ [eV] | $\Delta E_2$ [eV] | T    | H    |
| BeSc <sub>2</sub> | HPX                       | -             | $P4/mmm(123)$     | $P1(2)$      | -                  | 6.24  | 8.83  | 45.1           | 6.32  | 7.48  | 54.7            | 0.259          | 0.904             | -                 | 0.0  | 2.3  |
| BeV <sub>2</sub>  | HXX                       | -             | $Pbcm(57)$        | -            | -                  | 5.68  | 7.25  | 38.3           | -     | -     | -               | 2.015          | 3.622             | -                 | 0.0  | -    |
| BeCr <sub>2</sub> | TXH                       | -             | $Cm(8)$           | -            | 6.78               | 6.78  | 24.9  | -              | -     | -     | -               | 1.808          | 15.575            | 1.8               | -    | -    |
| BeMn <sub>2</sub> | HXX                       | -             | $P4/mmm(123)$     | -            | -                  | 7.38  | 5.24  | 45.2           | -     | -     | -               | 0.953          | 8.523             | -                 | 29.3 | -    |
| BeZr <sub>2</sub> | PXX                       | -             | -                 | $P2_1/m(11)$ | -                  | -     | -     | -              | 6.05  | 8.11  | 41.6            | 1.302          | 2.180             | -                 | -    | 0.0  |
| BeMo <sub>2</sub> | HPX                       | -             | $P1(2)$           | $P1(2)$      | -                  | 6.88  | 8.22  | 38.5           | 9.60  | 7.09  | 32.7            | 0.481          | 1.048             | -                 | 0.0  | 0.0  |
| BeRu <sub>2</sub> | TXH                       | -             | $C2/m(12)$        | -            | 8.70               | 7.49  | 30.6  | -              | -     | -     | -               | 1.128          | 9.799             | 0.0               | -    | -    |
| BeRh <sub>2</sub> | THX                       | -             | $P\bar{6}m2(187)$ | -            | 6.32               | 5.43  | 49.5  | 59.8           | 5.32  | 5.32  | -               | 0.239          | 1.681             | 0.0               | 0.0  | -    |
| BeAg <sub>2</sub> | THX                       | $P4/mmm(123)$ | $P4/mmm(123)$     | -            | 8.01               | 5.65  | 44.8  | 56.2           | 6.20  | 5.67  | -               | 0.552          | 5.148             | 0.0               | 0.0  | -    |
| BeHf <sub>2</sub> | HXX                       | -             | $P4mm(99)$        | -            | -                  | 7.98  | 5.64  | 45.0           | -     | -     | -               | 1.142          | 1.145             | -                 | 0.0  | -    |
| BeTa <sub>2</sub> | HXX                       | -             | $P2_1/m(11)$      | -            | -                  | 6.35  | 5.61  | 55.3           | -     | -     | -               | 7.349          | 8.785             | -                 | 0.0  | -    |
| BeW <sub>2</sub>  | HXX                       | -             | $P1(2)$           | -            | -                  | 7.34  | 8.14  | 37.4           | -     | -     | -               | 1.613          | 1.652             | -                 | 0.0  | -    |
| BeRe <sub>2</sub> | TXH                       | -             | $C2/m(12)$        | -            | 6.98               | 6.98  | 41.2  | -              | -     | -     | -               | 1.327          | 3.902             | 0.0               | -    | -    |
| BePt <sub>2</sub> | HXX                       | -             | $P\bar{6}m2(187)$ | -            | -                  | 5.51  | 5.52  | 60.0           | -     | -     | -               | 1.509          | 11.273            | -                 | 0.0  | -    |
| BeAu <sub>2</sub> | HTX                       | -             | $P\bar{6}m2(187)$ | -            | 6.13               | 6.10  | 54.9  | 55.7           | 6.08  | 6.09  | -               | 0.104          | 0.949             | 0.0               | 0.0  | -    |
| MgSc <sub>2</sub> | HXX                       | -             | $P4/mmm(123)$     | -            | -                  | 6.73  | 9.54  | 44.8           | -     | -     | -               | 3.061          | 9.615             | -                 | 0.0  | -    |
| MgRh <sub>2</sub> | THX                       | $C2/m(12)$    | $P4/mmm(123)$     | -            | 9.63               | 9.64  | 33.2  | 33.3           | 9.07  | 9.07  | -               | 0.102          | 1.958             | 3.6               | 0.0  | -    |
| MgIr <sub>2</sub> | HXX                       | -             | $Cm(8)$           | -            | -                  | 9.92  | 9.91  | 28.9           | -     | -     | -               | 5.421          | 6.766             | -                 | 0.0  | -    |
| CaCr <sub>2</sub> | HXX                       | -             | $Cmmm(65)$        | -            | -                  | 6.42  | 10.52 | 34.3           | -     | -     | -               | 3.709          | 3.723             | -                 | 36.4 | -    |
| CaAg <sub>2</sub> | HXX                       | -             | $P4/nmm(129)$     | -            | -                  | 7.29  | 10.38 | 45.1           | -     | -     | -               | 2.068          | 2.099             | -                 | 0.0  | -    |
| CaIr <sub>2</sub> | HXX                       | -             | $P1(1)$           | -            | -                  | 10.09 | 8.92  | 30.6           | -     | -     | -               | 7.678          | 7.791             | -                 | 0.0  | -    |
| CaAu <sub>2</sub> | HXX                       | -             | $Pmm2_1(31)$      | -            | -                  | 7.61  | 8.88  | 54.2           | -     | -     | -               | 1.218          | 1.219             | -                 | 0.0  | -    |
| SrSc <sub>2</sub> | PXX                       | -             | -                 | $P4mm(99)$   | -                  | -     | -     | -              | 10.27 | 7.19  | 44.3            | 6.776          | 7.510             | -                 | -    | 0.0  |
| SrY <sub>2</sub>  | HXX                       | -             | $P2/c(13)$        | -            | -                  | 8.66  | 13.98 | 28.0           | -     | -     | -               | 11.818         | 12.121            | -                 | 0.0  | -    |
| SrPd <sub>2</sub> | HXX                       | -             | $Pmma(51)$        | -            | -                  | 8.94  | 6.47  | 43.0           | -     | -     | -               | 5.686          | 7.687             | -                 | 0.0  | -    |
| SrAg <sub>2</sub> | HXX                       | -             | $P4/nmm(129)$     | -            | -                  | 7.87  | 11.16 | 44.7           | -     | -     | -               | 2.038          | 2.070             | -                 | 0.0  | -    |
| SrAu <sub>2</sub> | TPH                       | -             | $P\bar{6}m2(187)$ | -            | 10.80              | 10.84 | 60.1  | 60.0           | 8.49  | 8.59  | -               | 0.060          | 0.644             | 0.0               | 0.0  | 0.0  |
| BaCr <sub>2</sub> | PTH                       | $P6/mmm(191)$ | $P6/mmm(191)$     | $Cmmm(65)$   | 12.36              | 12.35 | 51.8  | 34.6           | 10.35 | 12.66 | 51.7            | 0.012          | 0.318             | 40.8              | 38.5 | 40.8 |
| BaY <sub>2</sub>  | TPX                       | $C2/m(12)$    | $C2/m(12)$        | -            | 14.17              | 14.16 | 30.4  | -              | -     | -     | -               | 4.497          | 11.981            | 0.0               | -    | -    |
| BaPd <sub>2</sub> | TPX                       | $C2/m(12)$    | $C2/m(12)$        | $Cmmm(65)$   | 11.56              | 11.56 | 46.8  | -              | -     | -     | -               | 0.173          | 1.447             | 0.0               | -    | 0.0  |
| BaAg <sub>2</sub> | HXX                       | -             | $Pmma(51)$        | -            | -                  | 6.90  | 9.76  | 44.1           | -     | -     | -               | 4.854          | 4.883             | -                 | 0.0  | -    |
| BaAu <sub>2</sub> | HXX                       | -             | $Pmm2_1(31)$      | -            | -                  | 9.83  | 8.33  | 54.0           | -     | -     | -               | 1.867          | 1.871             | -                 | 0.0  | -    |

Table 19: List of XII-I

| species           | Initial structure indices |                   | space group   |   | lattice parameters |       |       |                |       |       | relative energy |                | spin moment       |                   |     |     |   |
|-------------------|---------------------------|-------------------|---------------|---|--------------------|-------|-------|----------------|-------|-------|-----------------|----------------|-------------------|-------------------|-----|-----|---|
|                   | T                         | H                 | H             | P | a [Å]              | b [Å] | c [Å] | $\gamma$ [deg] | a [Å] | b [Å] | c [Å]           | $\gamma$ [deg] | $\Delta E_1$ [eV] | $\Delta E_2$ [eV] | T   | H   | P |
| CdNa <sub>2</sub> | THX                       | $P1(2)$           | $Amm2(38)$    | - | 9.91               | 10.42 | 37.9  | 10.08          | 10.08 | 38.0  | -               | -              | 0.815             | 1.987             | 0.0 | 0.0 | - |
| CdK <sub>2</sub>  | HXX                       | -                 | $P4/mmm(123)$ | - | -                  | -     | -     | 8.43           | 11.95 | 44.6  | -               | -              | 1.278             | 2.679             | -   | 0.0 | - |
| CdRb <sub>2</sub> | HXX                       | -                 | $P1(1)$       | - | -                  | -     | -     | 8.85           | 13.29 | 41.6  | -               | -              | 1.561             | 2.875             | -   | 0.0 | - |
| HgLi <sub>2</sub> | HXX                       | -                 | $P4/mmm(123)$ | - | -                  | -     | -     | 6.66           | 9.44  | 44.7  | -               | -              | 1.596             | 3.332             | -   | 0.0 | - |
| HgCs <sub>2</sub> | TXX                       | $P\bar{3}m1(164)$ | -             | - | 11.55              | 11.43 | 57.4  | -              | -     | -     | -               | -              | 1.902             | 3.325             | 0.0 | -   | - |

Table 20: List of XII-II

| species           | Initial structure indices | space group   |               | lattice parameters |       |       |                |       |       | relative energy |                | spin moment       |                   |       |       |     |     |     |
|-------------------|---------------------------|---------------|---------------|--------------------|-------|-------|----------------|-------|-------|-----------------|----------------|-------------------|-------------------|-------|-------|-----|-----|-----|
|                   |                           | T             | H             | a [Å]              | b [Å] | c [Å] | $\gamma$ [deg] | a [Å] | b [Å] | c [Å]           | $\gamma$ [deg] | $\Delta E_1$ [eV] | $\Delta E_2$ [eV] | T     | H     | P   |     |     |
| CdCa <sub>2</sub> | P $\bar{4}1$              | $C2/m(12)$    | $P6m2(187)$   | 8.05               | 8.07  | 7.91  | 59.1           | 7.91  | 7.90  | 59.5            | 59.5           | 7.80              | 9.10              | 0.438 | 0.706 | 0.0 | 0.0 | 0.0 |
| CdBa <sub>2</sub> | HPT                       | $C2/m(12)$    | $P6m2(187)$   | 10.64              | 10.61 | 9.24  | 56.1           | 9.24  | 9.19  | 58.5            | 60.1           | 10.29             | 10.26             | 0.497 | 0.549 | 0.0 | 0.0 | 0.0 |
| HgBe <sub>2</sub> | PHT                       | $P6/mmm(191)$ | $P6/mmm(191)$ | 8.29               | 8.29  | 8.29  | 60.0           | 8.29  | 8.29  | 60.0            | 60.0           | 8.29              | 8.30              | 0.016 | 0.018 | 0.0 | 0.0 | 0.0 |
| HgCa <sub>2</sub> | THP                       | $P2_1/m(11)$  | $P6m2(187)$   | 7.78               | 9.09  | 8.01  | 54.1           | 8.01  | 7.99  | 59.8            | 59.8           | 8.14              | 8.10              | 0.167 | 0.272 | 0.0 | 0.0 | 0.0 |
| HgSr <sub>2</sub> | HPT                       | $P3m1(164)$   | $P6m2(187)$   | 9.00               | 8.90  | 8.75  | 59.5           | 8.75  | 8.70  | 59.2            | 59.2           | 9.17              | 9.58              | 0.022 | 0.108 | 0.0 | 0.0 | 0.0 |
| HgBa <sub>2</sub> | PHX                       | —             | $P6m2(187)$   | —                  | —     | 9.26  | —              | 9.26  | 9.17  | 58.8            | 58.8           | 8.96              | 11.04             | 0.760 | 1.059 | —   | —   | —   |

Table 21: List of XII-XII

| species | space group |       | lattice parameters |       |       | relative energy |              | spin moment |                |       |       |                |                       |
|---------|-------------|-------|--------------------|-------|-------|-----------------|--------------|-------------|----------------|-------|-------|----------------|-----------------------|
|         | T           | H     | T                  | H     | P     | $\Delta E_1$    | $\Delta E_2$ | T           | H              | P     |       |                |                       |
| indices | a [Å]       | b [Å] | $\gamma$ [deg]     | a [Å] | b [Å] | $\gamma$ [deg]  | a [Å]        | b [Å]       | $\gamma$ [deg] | a [Å] | b [Å] | $\gamma$ [deg] | [ $\mu_B$ /unit cell] |
|         |             |       |                    |       |       |                 |              |             |                |       |       |                |                       |

Table 22: List of XII-XIII

| species           | Initial structure indices |            | space group |   | lattice parameters |      |      | relative energy   |                   | spin moment |   |   |       |       |     |     |
|-------------------|---------------------------|------------|-------------|---|--------------------|------|------|-------------------|-------------------|-------------|---|---|-------|-------|-----|-----|
|                   | T                         | H          | P           | H | T                  | H    | P    | $\Delta E_1$ [eV] | $\Delta E_2$ [eV] | T           | H |   |       |       |     |     |
| CdTe <sub>2</sub> | THX                       | $C2/m(12)$ | $Amm2(38)$  | — | 9.39               | 9.40 | 41.4 | 9.32              | 9.26              | 40.5        | — | — | 0.451 | 2.846 | 0.0 | 0.0 |

Table 23: List of XII-XIV

| species           | Initial structure indices |                  | space group       |   | lattice parameters |       |       |                |       |       | relative energy |                | spin moment       |                   |   |     |     |
|-------------------|---------------------------|------------------|-------------------|---|--------------------|-------|-------|----------------|-------|-------|-----------------|----------------|-------------------|-------------------|---|-----|-----|
|                   | T                         | H                | H                 | P | a [Å]              | b [Å] | c [Å] | $\gamma$ [deg] | a [Å] | b [Å] | c [Å]           | $\gamma$ [deg] | $\Delta E_1$ [eV] | $\Delta E_2$ [eV] | T | H   | P   |
| CdGe <sub>2</sub> | -                         | <i>Amm2</i> (38) | -                 | - | 9.22               | 9.22  | 36.9  | -              | -     | -     | -               | -              | 1.601             | 1.654             | - | 0.0 | -   |
| CdSn <sub>2</sub> | -                         | <i>Amm2</i> (38) | -                 | - | 9.63               | 9.78  | 37.6  | -              | -     | -     | -               | -              | 1.492             | 2.923             | - | 0.0 | -   |
| HgGe <sub>2</sub> | -                         | -                | <i>P3m1</i> (156) | - | -                  | -     | -     | -              | 8.12  | 8.13  | 59.9            | 59.9           | 2.224             | 3.213             | - | -   | 0.0 |
| HgSn <sub>2</sub> | -                         | <i>Amm2</i> (38) | <i>Pm</i> (6)     | - | 9.70               | 9.71  | 38.1  | -              | 9.31  | 9.34  | 59.7            | 59.7           | 0.567             | 1.287             | - | 0.0 | 0.0 |



Table 24: List of XII-XV

| species           | Initial structure indices |   | space group       |         | lattice parameters |       |       |                |       |       | relative energy |                | spin moment       |                   |     |     |     |
|-------------------|---------------------------|---|-------------------|---------|--------------------|-------|-------|----------------|-------|-------|-----------------|----------------|-------------------|-------------------|-----|-----|-----|
|                   | T                         | H | H                 | P       | a [Å]              | b [Å] | c [Å] | $\gamma$ [deg] | a [Å] | b [Å] | c [Å]           | $\gamma$ [deg] | $\Delta E_1$ [eV] | $\Delta E_2$ [eV] | T   | H   | P   |
| CdP <sub>2</sub>  | TXX                       | — | —                 | —       | 11.38              | 11.29 | —     | 34.1           | —     | —     | —               | —              | 0.824             | 2.323             | 0.0 | —   | —   |
| CdBi <sub>2</sub> | THX                       | — | —                 | —       | 12.89              | 12.88 | 9.20  | 39.4           | 9.20  | 9.20  | 58.2            | —              | 0.525             | 2.600             | 0.0 | 0.0 | —   |
| HgP <sub>2</sub>  | PTX                       | — | $P\bar{6}m2(187)$ | $P1(1)$ | 12.10              | 8.10  | —     | 46.7           | —     | —     | —               | —              | 0.798             | 3.283             | 0.0 | —   | 0.0 |
| HgBi <sub>2</sub> | TXX                       | — | —                 | —       | 13.27              | 13.23 | —     | 38.3           | —     | —     | —               | —              | 2.268             | 3.304             | 0.0 | —   | —   |

Table 25: List of XII-XVI

| species           | Initial structure indices | space group |          | lattice parameters |   |       |       |       |                | relative energy   |                   | spin moment |       |       |   |     |     |
|-------------------|---------------------------|-------------|----------|--------------------|---|-------|-------|-------|----------------|-------------------|-------------------|-------------|-------|-------|---|-----|-----|
|                   |                           | T           | H        | H                  | P | a [Å] | b [Å] | c [Å] | $\gamma$ [deg] | $\Delta E_1$ [eV] | $\Delta E_2$ [eV] | T           | H     | P     |   |     |     |
| CdO <sub>2</sub>  | PXX                       | -           | -        | -                  | - | -     | -     | -     | -              | 9.14              | 7.13              | 90.0        | 1.962 | 2.804 | - | -   | 2.0 |
| CdS <sub>2</sub>  | PHX                       | -           | Pc(7)    | -                  | - | 9.47  | 9.49  | 54.0  | -              | 9.68              | 8.44              | 55.2        | 0.408 | 5.042 | - | 0.0 | 0.0 |
| CdSe <sub>2</sub> | PHX                       | -           | C2(5)    | -                  | - | 11.60 | 8.63  | 47.4  | -              | 9.39              | 9.40              | 54.1        | 0.364 | 4.240 | - | 0.0 | 0.0 |
| HgO <sub>2</sub>  | PXX                       | -           | -        | -                  | - | -     | -     | -     | -              | 9.53              | 7.97              | 59.4        | 2.593 | 4.809 | - | -   | 0.0 |
| HgSe <sub>2</sub> | PHX                       | -           | C2/m(12) | -                  | - | 8.58  | 8.56  | 86.4  | -              | 11.54             | 9.97              | 45.2        | 0.539 | 4.257 | - | 0.0 | 0.0 |

Table 26: List of XII-XVII

| species           | Initial structure indices | space group           |       | lattice parameters |                |       |       |       |                | relative energy   |                   | spin moment |                |       |       |       |                |
|-------------------|---------------------------|-----------------------|-------|--------------------|----------------|-------|-------|-------|----------------|-------------------|-------------------|-------------|----------------|-------|-------|-------|----------------|
|                   |                           | T                     | H     | T                  | H              | T     | H     | T     | H              | $\Delta E_1$ [eV] | $\Delta E_2$ [eV] | T           | H              | P     |       |       |                |
|                   |                           | a [Å]                 | b [Å] | c [Å]              | $\gamma$ [deg] | a [Å] | b [Å] | c [Å] | $\gamma$ [deg] | a [Å]             | b [Å]             | c [Å]       | $\gamma$ [deg] | a [Å] | b [Å] | c [Å] | $\gamma$ [deg] |
| CdF <sub>2</sub>  | P $\bar{3}m1(164)$        | P $\bar{3}m1(164)$    | —     | 7.15               | 7.15           | —     | 59.8  | —     | 7.17           | 7.18              | —                 | 59.8        | 0.031          | 2.285 | 0.0   | —     | 0.0            |
| CdCl <sub>2</sub> | P $\bar{3}m1(164)$        | P $\bar{3}m1(164)$    | —     | 7.91               | 7.91           | —     | 58.7  | —     | 8.08           | 8.08              | —                 | 59.7        | 0.006          | 0.771 | 0.0   | 0.0   | 0.0            |
| CdBr <sub>2</sub> | P $\bar{3}m1(164)$        | P $\bar{3}m1(164)$    | —     | 8.21               | 8.21           | —     | 58.9  | —     | —              | —                 | —                 | —           | 0.874          | 1.427 | 0.0   | —     | —              |
| HgF <sub>2</sub>  | P $\bar{3}m1(164)$        | —                     | —     | 7.45               | 7.46           | —     | 59.4  | —     | 7.45           | 7.45              | —                 | 59.6        | 0.001          | 1.882 | 0.0   | —     | 0.0            |
| HgCl <sub>2</sub> | P $\bar{3}m1(164)$        | C <sub>2/m(12)</sub>  | —     | 8.21               | 8.22           | —     | 57.2  | —     | 9.88           | 8.34              | —                 | 53.0        | 0.350          | 1.827 | 0.0   | 0.0   | —              |
| HgBr <sub>2</sub> | C <sub>2/m(12)</sub>      | C <sub>2/m(12)</sub>  | —     | 8.49               | 9.57           | —     | 54.9  | —     | 8.43           | 8.41              | —                 | 68.4        | 0.079          | 0.926 | 0.0   | 0.0   | —              |
| HgI <sub>2</sub>  | C <sub>2/m(12)</sub>      | P <sub>4m2(115)</sub> | —     | 10.21              | 9.10           | —     | 54.9  | —     | 9.01           | 9.02              | —                 | 87.1        | 0.295          | 1.328 | 0.0   | 0.0   | —              |

Table 27: List of XII-TM

| species           | Initial structure indices |                     | space group         |   | lattice parameters |       |       |                |       |       | relative energy |                | spin moment       |                   |     |      |     |
|-------------------|---------------------------|---------------------|---------------------|---|--------------------|-------|-------|----------------|-------|-------|-----------------|----------------|-------------------|-------------------|-----|------|-----|
|                   | T                         | H                   | T                   | H | a [Å]              | b [Å] | c [Å] | $\gamma$ [deg] | a [Å] | b [Å] | c [Å]           | $\gamma$ [deg] | $\Delta E_1$ [eV] | $\Delta E_2$ [eV] | T   | H    | P   |
| CdCr <sub>2</sub> | HXX                       | —                   | —                   | — | —                  | —     | —     | —              | —     | —     | —               | —              | 2.805             | 3.215             | —   | —    | —   |
| CdY <sub>2</sub>  | PHT                       | <i>C2/m</i> (12)    | <i>P2/c</i> (13)    | — | 9.02               | 9.89  | 46.7  | 34.0           | 7.69  | 10.38 | —               | —              | 0.040             | 0.730             | 0.0 | 36.1 | —   |
| CdPd <sub>2</sub> | HTX                       | <i>C2/m</i> (12)    | <i>P4/mmm</i> (123) | — | 10.32              | 10.33 | 31.8  | 45.0           | 9.81  | 6.93  | 10.05           | 56.9           | 0.203             | 3.136             | 0.0 | 0.0  | 1.5 |
| CdAg <sub>2</sub> | PXX                       | —                   | <i>Pmmm</i> (47)    | — | —                  | —     | —     | 34.1           | 10.31 | 8.33  | —               | —              | 1.025             | 1.245             | —   | —    | —   |
| CdAu <sub>2</sub> | HXX                       | —                   | <i>P2/c</i> (13)    | — | —                  | —     | —     | —              | 8.60  | 7.54  | —               | —              | 1.506             | 1.517             | —   | —    | —   |
| HgAg <sub>2</sub> | PTX                       | <i>P6/mmm</i> (191) | —                   | — | 10.01              | 10.02 | 59.7  | —              | —     | —     | 10.01           | 59.7           | 0.055             | 1.936             | 0.0 | —    | —   |
| HgPt <sub>2</sub> | PTX                       | <i>F6mm</i> (183)   | —                   | — | 9.18               | 9.18  | 60.0  | —              | —     | —     | 9.20            | 60.2           | 0.055             | 2.866             | 0.0 | —    | —   |

Table 28: List of XIII-I

| species           | Initial structure indices | space group |       | lattice parameters |                |       |       |                   |                   | relative energy |       | spin moment |                |                   |                   |                            |
|-------------------|---------------------------|-------------|-------|--------------------|----------------|-------|-------|-------------------|-------------------|-----------------|-------|-------------|----------------|-------------------|-------------------|----------------------------|
|                   |                           | T           | H     | P                  | T              | H     | P     | $\Delta E_1$ [eV] | $\Delta E_2$ [eV] | T               | H     | P           |                |                   |                   |                            |
|                   |                           | a [Å]       | b [Å] | c [Å]              | $\gamma$ [deg] | a [Å] | b [Å] | c [Å]             | $\gamma$ [deg]    | a [Å]           | b [Å] | c [Å]       | $\gamma$ [deg] | $\Delta E_1$ [eV] | $\Delta E_2$ [eV] | $[\mu_B/\text{unit cell}]$ |
| BK <sub>2</sub>   | THX                       | 10.11       | 10.12 | 9.22               | 57.7           | 9.21  | 9.21  | 52.3              | —                 | —               | —     | —           | —              | 0.565             | 2.933             | 11.1                       |
| BRb <sub>2</sub>  | P3m1(164)                 | 10.45       | 10.46 | —                  | 58.3           | —     | —     | —                 | —                 | —               | —     | —           | —              | 2.549             | 3.286             | 11.0                       |
| AlK <sub>2</sub>  | P3m1(164)                 | 11.42       | 10.98 | 9.37               | 43.8           | 9.78  | 9.78  | 61.1              | —                 | —               | —     | —           | —              | 0.706             | 6.459             | 0.0                        |
| AlRb <sub>2</sub> | C2/m(12)                  | 11.40       | 11.84 | 10.18              | 44.1           | 13.18 | 13.18 | 40.0              | —                 | —               | —     | —           | —              | 0.424             | 5.631             | 0.0                        |
| InLi <sub>2</sub> | C2/m(12)                  | 6.32        | 9.04  | 9.15               | 45.6           | 6.45  | 6.45  | 45.0              | —                 | —               | —     | —           | —              | 0.051             | 4.573             | 0.0                        |
| InNa <sub>2</sub> | P4/mmm(123)               | 8.86        | 11.40 | 8.85               | 38.1           | 11.33 | 11.33 | 37.7              | —                 | —               | —     | —           | —              | 0.056             | 3.600             | 0.0                        |
| InK <sub>2</sub>  | Cmm(65)                   | 11.36       | 10.25 | 10.39              | 48.2           | 9.49  | 9.49  | 57.2              | —                 | —               | —     | —           | —              | 0.234             | 0.567             | 0.0                        |
| TlNa <sub>2</sub> | C2/m(12)                  | 8.95        | 11.56 | 8.91               | 37.8           | 11.53 | 11.53 | 37.9              | —                 | —               | —     | —           | —              | 0.024             | 3.001             | 0.0                        |
|                   | Pmm(47)                   | —           | —     | —                  | —              | —     | —     | —                 | —                 | 10.57           | 10.48 | —           | —              | —                 | —                 | —                          |

Table 29: List of XIII-II

| species           | Initial structure indices | space group       |               |   |   | lattice parameters |       |       |                |       |       |       |                | relative energy   |                   | spin moment |     |     |
|-------------------|---------------------------|-------------------|---------------|---|---|--------------------|-------|-------|----------------|-------|-------|-------|----------------|-------------------|-------------------|-------------|-----|-----|
|                   |                           | T                 | H             | P | T | a [Å]              | b [Å] | c [Å] | $\gamma$ [deg] | a [Å] | b [Å] | c [Å] | $\gamma$ [deg] | $\Delta E_1$ [eV] | $\Delta E_2$ [eV] | T           | H   | P   |
| BB <sub>e2</sub>  | TXX                       | $C2/m(12)$        | —             | — | — | 4.04               | 5.97  | 59.4  | —              | —     | —     | —     | —              | 1.451             | 1.965             | 0.0         | —   | —   |
| BMg <sub>2</sub>  | TPX                       | $P\bar{3}m1(164)$ | —             | — | — | 7.45               | 7.43  | 55.6  | —              | —     | 7.20  | 7.24  | 55.8           | 0.003             | 1.172             | 0.0         | —   | 0.0 |
| BSr <sub>2</sub>  | PXX                       | —                 | —             | — | — | —                  | —     | —     | —              | —     | 16.42 | 15.21 | 16.1           | 3.136             | 4.685             | —           | —   | 0.0 |
| BB <sub>a2</sub>  | P $\bar{3}m1(164)$        | —                 | —             | — | — | 9.32               | 9.29  | 58.0  | —              | —     | 9.19  | 9.25  | 59.1           | 0.012             | 1.120             | 4.2         | —   | 4.2 |
| AlB <sub>e2</sub> | TXX                       | $C2/m(12)$        | —             | — | — | 6.08               | 6.96  | 42.4  | —              | —     | —     | —     | —              | 2.495             | 3.435             | 0.0         | —   | —   |
| AlC <sub>a2</sub> | HPX                       | —                 | $P4/mmm(123)$ | — | — | —                  | —     | —     | —              | —     | 10.35 | 7.31  | 45.0           | 0.024             | 2.832             | —           | 0.0 | 0.0 |
| AlSr <sub>2</sub> | HXX                       | —                 | $Pnmm(47)$    | — | — | —                  | —     | —     | —              | —     | 7.86  | 11.03 | 44.7           | 2.095             | 2.108             | —           | 0.0 | —   |
| AlBa <sub>2</sub> | HPX                       | —                 | $P4/mmm(123)$ | — | — | —                  | —     | —     | —              | —     | 11.80 | 8.34  | 45.0           | 0.688             | 2.324             | —           | 0.0 | 0.0 |
| GaCa <sub>2</sub> | P $\bar{3}m1(164)$        | —                 | $P4/mmm(123)$ | — | — | 7.31               | 10.40 | 44.8  | —              | —     | 10.38 | 7.30  | 44.6           | 0.226             | 0.265             | 0.0         | 0.0 | 0.0 |
| InCa <sub>2</sub> | TXX                       | $P4/mmm(123)$     | —             | — | — | 7.57               | 10.75 | 44.6  | —              | —     | —     | —     | —              | 1.123             | 6.594             | 0.0         | —   | —   |
| InBa <sub>2</sub> | HXX                       | —                 | $P4/mmm(123)$ | — | — | —                  | —     | —     | —              | —     | 8.51  | 12.04 | 45.1           | 2.067             | 2.487             | —           | 0.0 | —   |
| TlB <sub>e2</sub> | P $\bar{3}m1(164)$        | —                 | $P6/mmm(191)$ | — | — | 8.40               | 8.40  | 60.0  | —              | —     | 8.39  | 8.39  | 60.0           | 0.005             | 0.006             | 0.0         | 0.0 | 0.0 |
| TlCa <sub>2</sub> | HPX                       | —                 | $P4/mmm(123)$ | — | — | —                  | —     | —     | —              | —     | 7.66  | 10.85 | 45.0           | 0.389             | 1.984             | —           | 0.0 | 0.0 |
| TlSr <sub>2</sub> | PXX                       | —                 | —             | — | — | —                  | —     | —     | —              | —     | —     | —     | —              | 1.108             | 1.465             | —           | —   | 0.0 |
| TlBa <sub>2</sub> | HPX                       | —                 | $P4/mmm(123)$ | — | — | —                  | —     | —     | —              | —     | 8.60  | 12.17 | 45.0           | 0.492             | 1.832             | —           | 0.0 | 0.0 |

Table 30: List of XIII-XII

| species           | Initial structure indices |   | space group  |              |         | lattice parameters |       |       |                |       |       | relative energy |                | spin moment       |                   |     |     |     |
|-------------------|---------------------------|---|--------------|--------------|---------|--------------------|-------|-------|----------------|-------|-------|-----------------|----------------|-------------------|-------------------|-----|-----|-----|
|                   | T                         | H | T            | H            | P       | a [Å]              | b [Å] | c [Å] | $\gamma$ [deg] | a [Å] | b [Å] | c [Å]           | $\gamma$ [deg] | $\Delta E_1$ [eV] | $\Delta E_2$ [eV] | T   | H   | P   |
| BGd <sub>2</sub>  | THX                       |   | $P1(2)$      | $Pc(7)$      | -       | 7.21               | 6.78  | 47.1  | 48.1           | -     | -     | -               | -              | 0.767             | 6.092             | 0.0 | 0.0 | -   |
| AlCd <sub>2</sub> | THX                       |   | $P2_1/c(13)$ | $P2_1/c(13)$ | -       | 7.45               | 8.76  | 40.6  | 60.3           | -     | -     | -               | -              | 0.531             | 3.763             | 0.0 | 0.0 | -   |
| AlHg <sub>2</sub> | THP                       |   | $P2_1/m(11)$ | $Pc(7)$      | $P1(2)$ | 8.03               | 8.04  | 44.1  | 44.3           | 9.74  | 8.70  | 8.70            | 49.4           | 0.042             | 0.795             | 0.0 | 0.0 | 0.0 |

Table 31: List of XIII-XIII

| species           | Initial structure indices | space group                |                                |               | lattice parameters |       |       |                |       |       | relative energy |                | spin moment       |                   |     |     |
|-------------------|---------------------------|----------------------------|--------------------------------|---------------|--------------------|-------|-------|----------------|-------|-------|-----------------|----------------|-------------------|-------------------|-----|-----|
|                   |                           | T                          | H                              | P             | a [Å]              | b [Å] | c [Å] | $\gamma$ [deg] | a [Å] | b [Å] | c [Å]           | $\gamma$ [deg] | $\Delta E_1$ [eV] | $\Delta E_2$ [eV] | T   | H   |
| BB <sub>2</sub>   | THX                       | <i>C</i> 2/ <i>m</i> (12)  | <i>Amm</i> 2(38)               | -             | 5.12               | 5.68  | 33.6  | 35.3           | 5.37  | 4.94  | 35.3            | 0.713          | 1.914             | 0.0               | 0.0 | -   |
| BAI <sub>2</sub>  | HTX                       | <i>C</i> 2/ <i>m</i> (12)  | <i>Amm</i> 2(38)               | -             | 6.48               | 6.65  | 59.2  | 45.2           | 6.66  | 6.34  | 45.2            | 0.492          | 2.832             | 0.0               | 0.0 | -   |
| AlB <sub>2</sub>  | THX                       | <i>P</i> 1(2)              | <i>Pmm</i> 2 <sub>1</sub> (31) | -             | 5.33               | 6.15  | 54.6  | 54.5           | 5.26  | 6.11  | 54.5            | 0.066          | 1.212             | 0.0               | 0.0 | -   |
| AlAl <sub>2</sub> | THX                       | <i>P</i> 3 <i>m</i> 1(164) | <i>P</i> 4/ <i>mmm</i> (123)   | -             | 5.51               | 5.51  | 62.7  | 87.5           | 5.48  | 5.48  | 87.5            | 0.676          | 6.286             | 0.0               | 0.0 | -   |
| AlIn <sub>2</sub> | THX                       | <i>P</i> 1(1)              | <i>P</i> 1(1)                  | -             | 6.16               | 7.74  | 50.9  | 53.4           | 7.37  | 6.28  | 53.4            | 0.041          | 5.934             | 0.0               | 0.0 | -   |
| AlTi <sub>2</sub> | HXX                       | -                          | <i>P</i> m(6)                  | -             | -                  | -     | -     | 55.6           | 7.10  | 7.12  | 55.6            | 1.199          | 2.662             | -                 | 0.0 | -   |
| InAl <sub>2</sub> | PHX                       | -                          | <i>Amm</i> 2(38)               | <i>Cm</i> (8) | -                  | -     | -     | 35.3           | 9.28  | 9.28  | 35.3            | 0.071          | 2.307             | -                 | 0.0 | 0.0 |
| InIn <sub>2</sub> | HXX                       | -                          | <i>Amm</i> 2(38)               | -             | -                  | -     | -     | 37.4           | 9.65  | 9.57  | 37.4            | 2.065          | 3.373             | -                 | 0.0 | -   |
| InTi <sub>2</sub> | HXX                       | -                          | <i>P</i> 6 <i>m</i> 2(187)     | -             | -                  | -     | -     | 59.9           | 6.94  | 6.95  | 59.9            | 3.251          | 4.456             | -                 | 0.0 | -   |
| TlIn <sub>2</sub> | HPX                       | -                          | <i>Amm</i> 2(38)               | <i>Cm</i> (8) | -                  | -     | -     | 58.4           | 6.97  | 6.64  | 58.4            | 0.448          | 4.086             | -                 | 0.0 | 0.0 |
| TlTi <sub>2</sub> | HXX                       | -                          | <i>P</i> 6 <i>m</i> 2(187)     | -             | -                  | -     | -     | 58.7           | 7.10  | 7.09  | 58.7            | 2.866          | 3.135             | -                 | 0.0 | -   |



Table 32: List of XIII-XIV

| species           | Initial structure indices | space group   |            |             | lattice parameters |       |      |                |       |       | relative energy |                   | spin moment       |     |     |     |     |
|-------------------|---------------------------|---------------|------------|-------------|--------------------|-------|------|----------------|-------|-------|-----------------|-------------------|-------------------|-----|-----|-----|-----|
|                   |                           | T             | H          | P           | a [Å]              | b [Å] | H    | $\gamma$ [deg] | a [Å] | b [Å] | P               | $\Delta E_1$ [eV] | $\Delta E_2$ [eV] | T   | H   | P   |     |
| BSi <sub>2</sub>  | TPX                       | $P3m1(164)$   | -          | $P21/m(11)$ | 6.43               | 6.42  | 60.0 | -              | 7.80  | 7.16  | 89.9            | 0.443             | 1.111             | 0.0 | -   | -   | 0.0 |
| BGe <sub>2</sub>  | TXX                       | $P3m1(164)$   | -          | -           | 6.71               | 6.71  | 60.0 | -              | -     | -     | -               | 0.916             | 1.964             | 0.0 | -   | -   | -   |
| BSe <sub>2</sub>  | TXX                       | $P3m1(164)$   | -          | -           | 7.36               | 7.36  | 60.0 | -              | -     | -     | -               | 1.261             | 2.480             | 0.0 | -   | -   | -   |
| AlC <sub>2</sub>  | HTP                       | $P\bar{1}(2)$ | $P1(1)$    | $Cmmc(67)$  | 6.99               | 6.75  | 39.5 | 6.26           | 5.90  | 41.9  | 40.0            | 0.144             | 0.327             | 0.0 | 0.0 | 0.0 | 0.0 |
| AlS <sub>2</sub>  | HTX                       | $P\bar{1}(2)$ | $Pc(7)$    | -           | 7.44               | 7.78  | 56.2 | 7.02           | 7.35  | 54.3  | -               | 0.623             | 4.540             | 0.0 | 0.0 | 0.0 | -   |
| AlGe <sub>2</sub> | HTX                       | $C2/m(12)$    | $Pc(7)$    | -           | 8.95               | 8.97  | 36.6 | 8.00           | 8.07  | 46.4  | -               | 0.389             | 5.203             | 0.0 | 0.0 | 0.0 | -   |
| AlSn <sub>2</sub> | HXX                       | -             | $Amm2(38)$ | -           | -                  | -     | -    | 8.68           | 8.68  | 45.5  | -               | 1.491             | 5.250             | -   | 0.0 | 0.0 | -   |
| AlPb <sub>2</sub> | HXX                       | -             | $Amm2(38)$ | -           | -                  | -     | -    | 8.86           | 8.86  | 46.7  | -               | 1.361             | 2.072             | -   | 0.0 | 0.0 | -   |
| GaSn <sub>2</sub> | HXX                       | -             | $Amm2(38)$ | -           | -                  | -     | -    | 9.90           | 9.94  | 36.7  | -               | 3.145             | 5.782             | -   | 0.2 | 0.2 | -   |

Table 33: List of XIII-XV

| species           | Initial structure indices | space group   |                   | lattice parameters |       |       |                |       |       | relative energy |                | spin moment       |                   |     |     |     |
|-------------------|---------------------------|---------------|-------------------|--------------------|-------|-------|----------------|-------|-------|-----------------|----------------|-------------------|-------------------|-----|-----|-----|
|                   |                           | T             | H                 | a [Å]              | b [Å] | c [Å] | $\gamma$ [deg] | a [Å] | b [Å] | c [Å]           | $\gamma$ [deg] | $\Delta E_1$ [eV] | $\Delta E_2$ [eV] | T   | H   | P   |
| BP <sub>2</sub>   | TXX                       | $C2/m(12)$    | -                 | 7.19               | 7.19  | 52.4  | -              | -     | -     | -               | -              | 3.719             | 4.235             | 0.0 | -   | -   |
| BSb <sub>2</sub>  | HXX                       | -             | -                 | -                  | 7.20  | 8.84  | 51.6           | -     | -     | -               | -              | 1.994             | 2.447             | 0.0 | -   | -   |
| BBi <sub>2</sub>  | PXX                       | $Cm(8)$       | -                 | -                  | -     | -     | -              | 8.53  | 8.92  | 57.6            | -              | 0.982             | 1.241             | -   | -   | 0.0 |
| AIN <sub>2</sub>  | PXX                       | -             | -                 | -                  | -     | -     | -              | 8.22  | 10.27 | 37.9            | -              | 0.943             | 3.355             | -   | -   | 0.0 |
| AIP <sub>2</sub>  | TXX                       | $P\bar{1}(2)$ | -                 | 7.62               | 7.84  | 41.5  | -              | -     | -     | -               | -              | 1.290             | 1.807             | 0.0 | -   | -   |
| AISb <sub>2</sub> | HTP                       | $P\bar{1}(2)$ | $P\bar{6}m2(187)$ | 10.18              | 8.75  | 44.0  | 59.2           | 10.29 | 8.07  | 50.1            | -              | 0.176             | 0.251             | 0.0 | 0.0 | -   |
| AIBi <sub>2</sub> | TXX                       | $P\bar{1}(2)$ | -                 | 9.06               | 8.59  | 43.3  | -              | -     | -     | -               | -              | 1.782             | 1.864             | 0.0 | -   | -   |
| TIN <sub>2</sub>  | PXX                       | -             | -                 | -                  | -     | -     | -              | 11.28 | 9.45  | 61.4            | -              | 17.897            | 18.774            | -   | -   | 0.0 |

Table 34: List of XIII-XVI

| species           | Initial structure indices |                   | space group |                   | lattice parameters |       |       |                |       |       | relative energy |                | spin moment       |                   |     |     |     |
|-------------------|---------------------------|-------------------|-------------|-------------------|--------------------|-------|-------|----------------|-------|-------|-----------------|----------------|-------------------|-------------------|-----|-----|-----|
|                   | T                         | H                 | H           | P                 | a [Å]              | b [Å] | c [Å] | $\gamma$ [deg] | a [Å] | b [Å] | c [Å]           | $\gamma$ [deg] | $\Delta E_1$ [eV] | $\Delta E_2$ [eV] | T   | H   | P   |
| BSe <sub>2</sub>  | HTX                       | $P1(1)$           | $Cm(8)$     | —                 | 8.00               | 6.40  | 49.8  | 6.32           | 6.18  | 77.4  | —               | —              | 0.665             | 5.197             | 0.0 | 0.0 | —   |
| AlO <sub>2</sub>  | TXX                       | $P\bar{3}m1(164)$ | —           | —                 | 5.71               | 5.71  | 64.4  | —              | —     | —     | —               | —              | 2.061             | 2.775             | 4.0 | —   | —   |
| AlS <sub>2</sub>  | PXX                       | —                 | —           | $P\bar{1}(2)$     | —                  | —     | —     | —              | —     | —     | 6.71            | 8.14           | 1.041             | 1.615             | —   | —   | 0.0 |
| AlSe <sub>2</sub> | TXX                       | $C2/m(12)$        | —           | —                 | 7.29               | 7.29  | 49.9  | —              | —     | —     | —               | —              | 2.444             | 2.936             | 0.0 | —   | —   |
| InO <sub>2</sub>  | TPX                       | $P\bar{3}m1(164)$ | —           | $P\bar{3}m1(164)$ | 6.67               | 6.69  | 65.5  | —              | —     | —     | 7.17            | 6.69           | 0.154             | 1.285             | 4.0 | —   | 4.0 |
| InS <sub>2</sub>  | PXX                       | —                 | —           | $P2_1/m(11)$      | —                  | —     | —     | —              | —     | —     | 8.90            | 8.91           | 1.836             | 2.242             | —   | —   | 0.0 |
| InTe <sub>2</sub> | HTP                       | $C2/m(12)$        | $C222(21)$  | $P2_1/m(11)$      | 8.51               | 8.50  | 47.8  | 8.53           | 8.53  | 46.2  | 9.24            | 9.24           | 0.058             | 0.390             | 0.0 | 0.0 | 0.0 |
| TlS <sub>2</sub>  | PXX                       | —                 | —           | $P2(3)$           | —                  | —     | —     | —              | —     | —     | 7.82            | 8.95           | 5.582             | 5.834             | —   | —   | 0.0 |

Table 35: List of XIII-XVII

| species           | Initial structure indices | space group                |               |               |   | lattice parameters |       |       |                |       |       | relative energy |                | spin moment       |                   |     |     |     |
|-------------------|---------------------------|----------------------------|---------------|---------------|---|--------------------|-------|-------|----------------|-------|-------|-----------------|----------------|-------------------|-------------------|-----|-----|-----|
|                   |                           | T                          | H             | P             |   | a [Å]              | b [Å] | c [Å] | $\gamma$ [deg] | a [Å] | b [Å] | c [Å]           | $\gamma$ [deg] | $\Delta E_1$ [eV] | $\Delta E_2$ [eV] | T   | H   | P   |
| BF <sub>2</sub>   | TXX                       | <i>P</i> 1(2)              | —             | —             | — | 6.80               | 8.63  | —     | 68.0           | —     | —     | —               | —              | 1.761             | 4.861             | 0.0 | —   | —   |
| BCl <sub>2</sub>  | HXX                       | —                          | <i>P</i> 1(1) | —             | — | —                  | —     | 8.10  | 7.03           | 79.3  | —     | —               | —              | 5.713             | 5.724             | —   | 0.0 | —   |
| BBr <sub>2</sub>  | TXX                       | —                          | —             | —             | — | 9.54               | 7.93  | —     | 73.5           | —     | —     | —               | —              | 3.011             | 3.019             | 0.0 | —   | —   |
| AlF <sub>2</sub>  | HTX                       | <i>C</i> 2/ <i>m</i> (12)  | —             | —             | — | 6.76               | 5.18  | 6.79  | 59.3           | 65.4  | —     | —               | —              | 0.168             | 2.742             | 0.0 | 0.0 | —   |
| AlBr <sub>2</sub> | HXX                       | —                          | —             | —             | — | —                  | —     | 11.39 | 7.31           | 65.4  | —     | —               | —              | 0.908             | 2.623             | —   | 0.0 | —   |
| TlBr <sub>2</sub> | HPT                       | <i>P</i> 2/ <i>m</i> (10)  | <i>P</i> 1(2) | —             | — | 9.39               | 8.65  | 11.31 | 62.1           | 41.1  | 8.42  | 13.59           | 55.8           | 0.204             | 0.207             | 0.0 | 0.0 | 0.0 |
| TlI <sub>2</sub>  | PTX                       | <i>P</i> 3 <i>m</i> 1(164) | —             | <i>P</i> 1(2) | — | 9.18               | 9.17  | —     | 57.7           | —     | 10.73 | 11.54           | 71.8           | 0.527             | 1.204             | 0.0 | —   | 0.0 |

Table 36: List of XIII-TM

| species           | Initial structure indices | space group |   |                        | lattice parameters |       |       |                |       |       | relative energy |                | spin moment       |                   |      |   |      |
|-------------------|---------------------------|-------------|---|------------------------|--------------------|-------|-------|----------------|-------|-------|-----------------|----------------|-------------------|-------------------|------|---|------|
|                   |                           | T           | H | P                      | a [Å]              | b [Å] | c [Å] | $\gamma$ [deg] | a [Å] | b [Å] | c [Å]           | $\gamma$ [deg] | $\Delta E_1$ [eV] | $\Delta E_2$ [eV] | T    | H | P    |
| BTl <sub>2</sub>  | P3m1(164)                 |             |   | P1(1)                  | 6.16               | 6.17  | 60.1  |                | 7.35  | 7.10  | 36.3            | 0.451          | 3.307             | 0.0               |      |   | 0.0  |
| BCr <sub>2</sub>  |                           | P2/m(10)    |   | P2 <sub>1</sub> /m(11) |                    |       |       | 5.02           | 6.08  | 49.1  |                 | 0.558          | 2.198             |                   | 0.0  |   | 0.0  |
| BMn <sub>2</sub>  |                           |             |   |                        | 6.30               | 6.31  | 60.1  |                | 6.24  | 6.26  | 53.9            | 1.940          | 5.815             |                   | 27.5 |   |      |
| BNi <sub>2</sub>  | P3m1(164)                 |             |   |                        | 5.27               | 5.27  | 59.6  |                | 5.12  | 5.12  |                 | 0.413          | 4.629             |                   | 0.0  |   |      |
| BY <sub>2</sub>   | P3m1(164)                 |             |   |                        | 7.71               | 7.70  | 59.8  |                |       |       |                 | 1.297          | 3.219             |                   | 0.0  |   |      |
| BNb <sub>2</sub>  | P3m1(164)                 |             |   |                        | 6.32               | 6.31  | 59.9  |                |       |       |                 | 4.132          | 13.651            |                   | 0.0  |   |      |
| BRu <sub>2</sub>  |                           | P6m2(187)   |   |                        |                    |       |       | 5.57           | 5.58  | 60.0  |                 | 1.003          | 1.062             |                   | 0.0  |   |      |
| BRh <sub>2</sub>  | P2 <sub>1</sub> /m(11)    |             |   | P2 <sub>1</sub> /m(11) | 5.51               | 5.51  | 60.0  |                | 5.47  | 5.47  | 60.0            | 0.015          | 0.267             |                   | 0.0  |   | 0.0  |
| BPd <sub>2</sub>  | P3m1(164)                 |             |   |                        | 5.87               | 5.87  | 60.0  |                | 5.73  | 5.73  | 59.9            | 0.724          | 3.647             |                   | 0.0  |   | 0.0  |
| BAg <sub>2</sub>  | Pmmma(51)                 |             |   |                        | 5.42               | 6.23  | 54.3  |                |       |       |                 | 5.683          | 7.225             |                   | 0.0  |   |      |
| BHf <sub>2</sub>  | P3m1(164)                 |             |   |                        | 6.59               | 6.59  | 60.0  |                | 6.32  | 6.33  |                 | 0.060          | 2.799             |                   | 0.0  |   |      |
| BTa <sub>2</sub>  | P3m1(164)                 |             |   |                        | 6.25               | 6.25  | 60.0  |                |       |       |                 | 1.487          | 4.771             |                   | 0.0  |   |      |
| BW <sub>2</sub>   | P3m1(164)                 |             |   |                        | 6.16               | 6.16  | 60.0  |                | 5.77  | 5.77  | 59.9            | 0.647          | 4.847             |                   | 0.0  |   |      |
| BRe <sub>2</sub>  |                           | P6m2(187)   |   |                        |                    |       |       | 5.66           | 5.66  | 60.0  |                 | 4.914          | 7.263             |                   | 0.0  |   |      |
| BOs <sub>2</sub>  | P2 <sub>1</sub> /m(11)    |             |   |                        | 5.50               | 5.41  | 59.4  |                | 5.48  | 5.42  | 59.6            | 0.517          | 11.452            |                   | 0.0  |   |      |
| BIr <sub>2</sub>  | P3m1(164)                 |             |   |                        | 5.43               | 5.43  | 60.0  |                | 5.46  | 5.46  | 60.0            | 0.226          | 13.691            |                   | 0.0  |   |      |
| BPt <sub>2</sub>  | P3m1(164)                 |             |   |                        | 5.71               | 5.72  | 60.0  |                | 5.68  | 5.69  | 60.0            | 0.524          | 2.810             |                   | 0.0  |   | 0.0  |
| BAu <sub>2</sub>  |                           |             |   | P4/mmm(123)            |                    |       |       | 8.77           | 6.20  | 45.0  |                 | 1.297          | 1.488             |                   | 0.0  |   |      |
| AlSe <sub>2</sub> |                           |             |   |                        |                    |       |       | 7.23           | 7.98  | 39.4  |                 | 1.350          | 1.376             |                   | 0.0  |   |      |
| AlCr <sub>2</sub> |                           |             |   |                        |                    |       |       |                |       |       |                 | 4.443          | 11.654            |                   | 0.0  |   |      |
| AlY <sub>2</sub>  |                           |             |   |                        |                    |       |       | 9.56           | 6.76  | 45.1  |                 | 0.888          | 4.155             |                   | 0.0  |   |      |
| AlZr <sub>2</sub> |                           |             |   |                        |                    |       |       | 8.90           | 7.23  | 35.7  |                 | 1.093          | 2.313             |                   | 0.0  |   |      |
| AlMo <sub>2</sub> |                           |             |   |                        |                    |       |       | 7.39           | 10.20 | 30.8  |                 | 0.309          | 0.821             |                   | 0.0  |   | 0.0  |
| AlRu <sub>2</sub> |                           |             |   |                        |                    |       |       | 7.72           | 6.69  | 43.7  |                 | 7.612          | 8.751             |                   | 0.0  |   |      |
| AlRh <sub>2</sub> |                           |             |   |                        |                    |       |       | 7.78           | 5.50  | 45.0  |                 | 0.265          | 1.125             |                   | 0.0  |   | 0.0  |
| AlPd <sub>2</sub> |                           |             |   |                        | 6.96               | 5.63  | 53.2  |                | 5.88  | 5.88  | 59.9            | 0.287          | 1.642             |                   | 0.0  |   |      |
| AlAg <sub>2</sub> |                           |             |   |                        | 7.19               | 8.24  | 43.0  |                | 5.82  | 8.36  | 44.1            | 0.366          | 3.429             |                   | 0.0  |   |      |
| AlHf <sub>2</sub> |                           |             |   |                        | 7.70               | 7.69  | 45.9  |                |       |       |                 | 2.870          | 4.085             |                   | 0.0  |   |      |
| AlW <sub>2</sub>  |                           |             |   |                        | 9.17               | 7.79  | 30.9  |                | 8.03  | 7.39  | 40.6            | 0.293          | 0.613             |                   | 0.0  |   | 0.0  |
| AlIr <sub>2</sub> |                           |             |   |                        |                    |       |       | 7.81           | 6.82  | 42.6  |                 | 1.127          | 6.685             |                   | 0.0  |   |      |
| AlPt <sub>2</sub> |                           |             |   |                        | 8.00               | 5.65  | 44.7  |                | 5.81  | 5.82  | 60.1            | 0.212          | 6.625             |                   | 0.0  |   |      |
| AlAu <sub>2</sub> |                           |             |   |                        | 8.03               | 6.92  | 43.7  |                | 5.85  | 8.32  | 46.1            | 0.701          | 2.688             |                   | 0.0  |   |      |
| GaTi <sub>2</sub> |                           |             |   |                        |                    |       |       |                |       |       |                 | 3.154          | 3.531             |                   | 0.0  |   |      |
| GaCr <sub>2</sub> |                           |             |   |                        | 6.04               | 8.64  | 43.3  |                |       |       |                 | 0.958          | 5.749             |                   | 33.7 |   |      |
| GaMn <sub>2</sub> |                           |             |   |                        |                    |       |       | 5.78           | 8.35  | 41.9  |                 | 3.209          | 4.275             |                   | 31.7 |   |      |
| GaY <sub>2</sub>  |                           |             |   |                        |                    |       |       | 7.03           | 9.96  | 44.9  |                 | 0.142          | 2.547             |                   | 0.0  |   | 0.0  |
| InSe <sub>2</sub> |                           |             |   |                        |                    |       |       | 6.65           | 9.46  | 45.0  |                 | 3.680          | 6.339             |                   | 0.0  |   |      |
| InTi <sub>2</sub> |                           |             |   |                        | 10.64              | 10.63 | 31.5  |                |       |       |                 | 1.117          | 5.256             |                   | 0.0  |   |      |
| InV <sub>2</sub>  |                           |             |   |                        | 10.66              | 10.65 | 31.1  |                |       |       |                 | 3.078          | 3.226             |                   | 0.0  |   |      |
| InCr <sub>2</sub> |                           |             |   |                        |                    |       |       | 6.11           | 8.63  | 45.1  |                 | 1.595          | 2.770             |                   | 35.6 |   |      |
| InMn <sub>2</sub> |                           |             |   |                        |                    |       |       |                |       |       |                 | 2.572          | 2.657             |                   | 0.0  |   | 22.2 |
| InY <sub>2</sub>  |                           |             |   |                        |                    |       |       | 6.81           | 9.62  | 45.1  |                 | 2.618          | 3.690             |                   | 0.0  |   |      |
| InPd <sub>2</sub> |                           |             |   |                        |                    |       |       |                |       |       |                 | 3.750          | 4.080             |                   | 0.0  |   | 0.0  |
| InOs <sub>2</sub> |                           |             |   |                        |                    |       |       |                |       |       |                 | 7.610          | 8.673             |                   | 0.0  |   | 0.0  |
| InAu <sub>2</sub> |                           |             |   |                        | 9.88               | 9.87  | 60.1  |                |       |       |                 | 0.001          | 1.107             |                   | 0.0  |   | 0.0  |
| TlCr <sub>2</sub> |                           |             |   |                        |                    |       |       | 11.10          | 7.66  | 33.2  |                 | 5.563          | 5.653             |                   | 26.6 |   |      |

Table 37: List of XIV-I

| species           | Initial structure indices | space group       |            |                   | lattice parameters |       |       |                |       |       | relative energy |                | spin moment       |                   |     |     |     |
|-------------------|---------------------------|-------------------|------------|-------------------|--------------------|-------|-------|----------------|-------|-------|-----------------|----------------|-------------------|-------------------|-----|-----|-----|
|                   |                           | T                 | H          | P                 | a [Å]              | b [Å] | c [Å] | $\gamma$ [deg] | a [Å] | b [Å] | c [Å]           | $\gamma$ [deg] | $\Delta E_1$ [eV] | $\Delta E_2$ [eV] | T   | H   | P   |
| CK <sub>2</sub>   | TXX                       | $P\bar{3}m1(164)$ | -          | -                 | 9.26               | 9.28  | 58.4  | -              | -     | -     | -               | -              | 1.062             | 2.497             | 8.0 | -   | -   |
| CRb <sub>2</sub>  | TXX                       | $P\bar{3}m1(164)$ | -          | -                 | 9.55               | 9.56  | 58.4  | -              | -     | -     | -               | -              | 0.985             | 2.050             | 8.1 | -   | -   |
| CCs <sub>2</sub>  | PTX                       | $P\bar{3}m1(164)$ | -          | -                 | 9.98               | 9.99  | 58.0  | -              | -     | -     | -               | -              | 0.035             | 0.996             | 8.1 | -   | 8.1 |
| SiNa <sub>2</sub> | PTX                       | $C2/m(12)$        | -          | $P\bar{3}m1(164)$ | 9.31               | 9.86  | 43.7  | -              | -     | -     | -               | -              | 0.679             | 1.723             | 0.0 | -   | 0.0 |
| SiK <sub>2</sub>  | HXX                       | -                 | $Amm2(38)$ | -                 | -                  | -     | -     | 9.75           | 10.41 | 46.2  | -               | -              | 3.611             | 3.632             | -   | 0.0 | -   |
| SiRb <sub>2</sub> | HXX                       | -                 | $Amm2(38)$ | -                 | -                  | -     | -     | 10.13          | 10.81 | 46.4  | -               | -              | 3.591             | 5.384             | -   | 0.0 | -   |
| SiCs <sub>2</sub> | PTX                       | $P\bar{3}m1(164)$ | -          | $P2_1/m(11)$      | 11.81              | 11.79 | 58.3  | -              | -     | -     | -               | -              | 0.013             | 1.126             | 8.0 | -   | 8.0 |
| GeK <sub>2</sub>  | HXX                       | -                 | $Amm2(38)$ | -                 | -                  | -     | -     | 10.57          | 9.90  | 46.0  | -               | -              | 2.766             | 3.054             | -   | 0.0 | -   |
| GeRb <sub>2</sub> | HXX                       | -                 | $Amm2(38)$ | -                 | -                  | -     | -     | 10.96          | 10.28 | 46.3  | -               | -              | 2.719             | 4.539             | -   | 0.0 | -   |
| GeCs <sub>2</sub> | PTH                       | $P\bar{3}m1(164)$ | -          | $P\bar{3}m1(164)$ | 11.87              | 11.83 | 58.2  | -              | -     | -     | -               | -              | 0.015             | 0.776             | 8.0 | 5.3 | 8.0 |
| SnK <sub>2</sub>  | HXX                       | -                 | $Amm2(38)$ | -                 | -                  | -     | -     | 10.55          | 11.48 | 45.0  | -               | -              | 2.288             | 2.307             | -   | 0.0 | -   |
| SnRb <sub>2</sub> | HXX                       | -                 | $Amm2(38)$ | -                 | -                  | -     | -     | 10.89          | 11.68 | 45.6  | -               | -              | 2.089             | 2.099             | -   | 0.0 | -   |
| SnCs <sub>2</sub> | HXX                       | -                 | $Cmmm(65)$ | -                 | -                  | -     | -     | 10.34          | 13.50 | 39.4  | -               | -              | 2.435             | 2.463             | -   | 0.0 | -   |
| PbRb <sub>2</sub> | HXX                       | -                 | $Amm2(38)$ | -                 | -                  | -     | -     | 10.96          | 11.95 | 46.2  | -               | -              | 1.818             | 3.099             | -   | 0.0 | -   |
| PbCs <sub>2</sub> | HXX                       | -                 | $Cmmm(65)$ | -                 | -                  | -     | -     | 10.34          | 13.60 | 40.1  | -               | -              | 2.093             | 3.761             | -   | 0.0 | -   |

Table 38: List of XIV-II

| species           | Initial structure indices | space group       |               |                   | lattice parameters |       |       |                |       |       | relative energy |                | spin moment       |                   |       |     |     |
|-------------------|---------------------------|-------------------|---------------|-------------------|--------------------|-------|-------|----------------|-------|-------|-----------------|----------------|-------------------|-------------------|-------|-----|-----|
|                   |                           | T                 | H             | P                 | a [Å]              | b [Å] | c [Å] | $\gamma$ [deg] | a [Å] | b [Å] | c [Å]           | $\gamma$ [deg] | $\Delta E_1$ [eV] | $\Delta E_2$ [eV] | T     | H   | P   |
| CB <sub>2</sub>   | PTX                       | $P\bar{3}m1(164)$ | —             | $Pm\bar{m}n(59)$  | 5.95               | 5.95  | 60.0  | —              | 5.68  | 5.95  | 58.4            | 0.101          | 5.950             | 0.0               | —     | —   | 0.0 |
| CMg <sub>2</sub>  | TXX                       | $P\bar{3}m1(164)$ | —             | —                 | 7.16               | 7.16  | 59.6  | —              | —     | —     | —               | 2.292          | 3.812             | 0.0               | —     | —   | —   |
| CCa <sub>2</sub>  | TXX                       | $P\bar{3}m1(164)$ | —             | —                 | 7.94               | 7.94  | 58.9  | —              | —     | —     | —               | 1.278          | 3.176             | 0.0               | —     | —   | —   |
| CBa <sub>2</sub>  | TXX                       | $P\bar{3}m1(164)$ | —             | —                 | 8.49               | 8.49  | 59.8  | —              | —     | —     | —               | 1.533          | 2.727             | 0.0               | —     | —   | —   |
| SiBe <sub>2</sub> | TXX                       | $Cmmnc(67)$       | —             | —                 | 7.70               | 7.03  | 29.8  | —              | —     | —     | —               | 2.089          | 5.750             | 0.0               | —     | —   | —   |
| SiCa <sub>2</sub> | PTX                       | $P\bar{3}m1(164)$ | —             | —                 | 9.44               | 9.44  | 59.8  | —              | —     | —     | —               | 9.41           | 60.1              | 0.000             | 2.665 | 0.0 | 0.0 |
| SiSr <sub>2</sub> | PTX                       | $P\bar{3}m1(164)$ | —             | —                 | 9.90               | 9.90  | 59.6  | —              | —     | —     | —               | 9.84           | 60.0              | 0.003             | 2.382 | 0.0 | 0.0 |
| SiBa <sub>2</sub> | PTX                       | $P\bar{3}m1(164)$ | —             | —                 | 10.28              | 10.27 | 59.0  | —              | —     | —     | —               | 10.14          | 60.1              | 0.013             | 1.590 | 0.0 | 0.0 |
| GeBe <sub>2</sub> | HPT                       | $P6mm(183)$       | $Pmm2_1(31)$  | $Pm\bar{m}n(59)$  | 7.51               | 7.53  | 60.0  | 47.0           | 6.45  | 6.45  | —               | 7.59           | 58.9              | 0.620             | 0.717 | 0.0 | 0.0 |
| GeMg <sub>2</sub> | PTX                       | $P\bar{3}m1(164)$ | —             | $Pm\bar{m}n(59)$  | 8.89               | 8.90  | 59.6  | —              | —     | —     | —               | 9.01           | 55.4              | 0.432             | 1.688 | 0.0 | 0.0 |
| GeCa <sub>2</sub> | PTX                       | $P\bar{3}m1(164)$ | —             | $P\bar{3}m1(164)$ | 9.50               | 9.50  | 59.6  | —              | —     | —     | —               | 9.43           | 60.1              | 0.005             | 2.573 | 0.0 | 0.0 |
| GeSr <sub>2</sub> | PTX                       | $P\bar{3}m1(164)$ | —             | $P\bar{3}m1(164)$ | 9.92               | 9.92  | 59.6  | —              | —     | —     | —               | 9.86           | 59.9              | 0.003             | 2.266 | 0.0 | 0.0 |
| GeBa <sub>2</sub> | PTX                       | $P\bar{3}m1(164)$ | —             | $P\bar{3}m1(164)$ | 10.28              | 10.28 | 59.2  | —              | —     | —     | —               | 10.16          | 60.2              | 0.010             | 1.539 | 0.0 | 0.0 |
| SuBe <sub>2</sub> | HXX                       | —                 | $Pma2(28)$    | —                 | —                  | —     | —     | 7.19           | 8.34  | 30.2  | —               | —              | 4.465             | 4.815             | —     | 0.0 | —   |
| SuCa <sub>2</sub> | TPH                       | $P\bar{3}m1(164)$ | $P4/mmm(123)$ | $P\bar{3}m1(164)$ | 10.12              | 10.12 | 60.0  | —              | 7.62  | 10.79 | 44.8            | 10.11          | 60.0              | 0.018             | 0.590 | 0.0 | 0.0 |
| SuSr <sub>2</sub> | TPX                       | $P\bar{3}m1(164)$ | —             | $P\bar{3}m1(164)$ | 10.51              | 10.53 | 60.0  | —              | —     | —     | —               | 10.49          | 60.1              | 0.070             | 2.162 | 0.0 | 0.0 |
| SuBa <sub>2</sub> | TPX                       | $P\bar{3}m1(164)$ | —             | $P\bar{3}m1(164)$ | 10.86              | 10.91 | 59.6  | —              | —     | —     | —               | 10.95          | 60.1              | 0.029             | 1.678 | 0.0 | 0.0 |
| PbBe <sub>2</sub> | PTX                       | $P6mm(183)$       | —             | $P6mm(183)$       | 8.03               | 8.03  | 60.0  | —              | —     | —     | —               | 8.03           | 60.0              | 0.000             | 6.908 | 0.0 | 0.0 |
| PbCa <sub>2</sub> | PTX                       | $P\bar{3}m1(164)$ | —             | $P\bar{3}m1(164)$ | 10.26              | 10.26 | 59.7  | —              | —     | —     | —               | 10.22          | 60.0              | 0.006             | 2.093 | 0.0 | 0.0 |
| PbSr <sub>2</sub> | PTX                       | $P\bar{3}m1(164)$ | —             | $P\bar{3}m1(164)$ | 10.69              | 10.68 | 59.7  | —              | —     | —     | —               | 10.64          | 59.9              | 0.004             | 1.946 | 0.0 | 0.0 |
| PbBa <sub>2</sub> | PTX                       | $P\bar{3}m1(164)$ | —             | $P\bar{3}m1(164)$ | 11.06              | 11.04 | 59.4  | —              | —     | —     | —               | 10.96          | 59.7              | 0.007             | 1.629 | 0.0 | 0.0 |

Table 39: List of XIV-XII

| species           | Initial structure indices | space group       |              | lattice parameters |       |       |       |                |       | relative energy |       | spin moment    |                   |                   |     |   |
|-------------------|---------------------------|-------------------|--------------|--------------------|-------|-------|-------|----------------|-------|-----------------|-------|----------------|-------------------|-------------------|-----|---|
|                   |                           | T                 | H            | P                  | a [Å] | b [Å] | c [Å] | $\gamma$ [deg] | a [Å] | b [Å]           | c [Å] | $\gamma$ [deg] | $\Delta E_1$ [eV] | $\Delta E_2$ [eV] | T   | H |
| CCd <sub>2</sub>  | THX                       | $P2_1/m(11)$      | $Pmm2_1(31)$ | -                  | 7.22  | 6.86  | 58.1  | 6.80           | 6.80  | 52.1            | -     | 0.346          | 2.386             | 0.0               | 0.0 | - |
| GeCd <sub>2</sub> | HTX                       | $P\bar{3}m1(164)$ | $Amm2(38)$   | -                  | 9.08  | 9.08  | 59.8  | 8.87           | 8.84  | 38.0            | -     | 0.761          | 0.863             | 0.0               | 0.0 | - |
| SnHg <sub>2</sub> | HXX                       | -                 | $P2/m(10)$   | -                  | -     | -     | -     | 10.65          | 13.41 | 26.7            | -     | 2.336          | 3.721             | -                 | 0.0 | - |



Table 40: List of XIV-XIII

| species           | Initial structure indices |                   | space group                    |               | lattice parameters |      |      |       |       |       | relative energy |                   | spin moment       |     |     |     |
|-------------------|---------------------------|-------------------|--------------------------------|---------------|--------------------|------|------|-------|-------|-------|-----------------|-------------------|-------------------|-----|-----|-----|
|                   | T                         | H                 | H                              | P             | T                  | H    | T    | H     | a [Å] | b [Å] | c [Å]           | $\Delta E_1$ [eV] | $\Delta E_2$ [eV] | T   | H   | P   |
| CB <sub>2</sub>   | TPX                       | <i>P</i> 1(2)     | -                              | <i>P</i> 1(1) | 5.21               | 5.53 | 36.1 | -     | 5.28  | 6.63  | 83.9            | 0.085             | 3.588             | 0.0 | -   | 0.0 |
| CTl <sub>2</sub>  | TXX                       | <i>P</i> 3m1(156) | -                              | -             | 7.80               | 7.80 | 59.6 | -     | -     | -     | -               | 1.855             | 2.813             | 0.0 | -   | -   |
| SiB <sub>2</sub>  | HTP                       | <i>C</i> m(8)     | -                              | <i>P</i> 1(2) | 7.35               | 7.35 | 48.3 | -     | 5.96  | 7.86  | 60.7            | 0.471             | 0.528             | 0.0 | 0.0 | 0.0 |
| SiAl <sub>2</sub> | HXX                       | -                 | <i>C</i> 2(5)                  | -             | -                  | -    | -    | 6.88  | 6.87  | 43.4  | -               | 2.678             | 4.125             | 0.0 | -   | -   |
| GeAl <sub>2</sub> | HXX                       | -                 | <i>P</i> mm2 <sub>1</sub> (31) | -             | -                  | -    | -    | 7.52  | 7.52  | 41.7  | -               | 1.794             | 2.666             | 0.0 | -   | -   |
| GeIn <sub>2</sub> | HXX                       | -                 | <i>A</i> mm2(38)               | -             | -                  | -    | -    | 8.11  | 8.10  | 39.7  | -               | 0.867             | 0.879             | 0.0 | -   | -   |
| GeTl <sub>2</sub> | HXX                       | -                 | <i>P</i> m(6)                  | -             | -                  | -    | -    | 8.81  | 8.97  | 40.7  | -               | 1.926             | 1.934             | 0.0 | -   | -   |
| SnAl <sub>2</sub> | PXX                       | -                 | <i>P</i> m(6)                  | <i>P</i> 1(1) | -                  | -    | -    | 8.49  | 7.08  | 51.7  | -               | 3.860             | 5.502             | 0.0 | -   | 0.0 |
| SnIn <sub>2</sub> | HXX                       | -                 | <i>A</i> mm2(38)               | -             | -                  | -    | -    | 9.54  | 9.31  | 39.1  | -               | 1.481             | 1.499             | 0.0 | -   | -   |
| PbIn <sub>2</sub> | HXX                       | -                 | <i>A</i> mm2(38)               | -             | -                  | -    | -    | 9.90  | 9.90  | 38.4  | -               | 1.235             | 1.498             | 0.0 | -   | -   |
| PbTl <sub>2</sub> | HXX                       | -                 | <i>P</i> 2/m(10)               | -             | -                  | -    | -    | 12.44 | 9.42  | 33.2  | -               | 2.366             | 3.528             | 0.0 | -   | -   |

Table 41: List of XIV-XIV

| species           | Initial structure indices  | space group            |                            | lattice parameters |       |       |                |       |       | relative energy |                | spin moment       |                   |   |     |     |     |
|-------------------|----------------------------|------------------------|----------------------------|--------------------|-------|-------|----------------|-------|-------|-----------------|----------------|-------------------|-------------------|---|-----|-----|-----|
|                   |                            | T                      | H                          | a [Å]              | b [Å] | c [Å] | $\gamma$ [deg] | a [Å] | b [Å] | c [Å]           | $\gamma$ [deg] | $\Delta E_1$ [eV] | $\Delta E_2$ [eV] | T | H   | P   |     |
| CC <sub>2</sub>   | HXX                        | -                      | <i>Cm</i> (8)              | -                  | -     | -     | -              | 4.27  | 4.94  | 30.1            | -              | 4.542             | 4.575             | - | 0.0 | -   | -   |
| CSi <sub>2</sub>  | PXX                        | -                      | -                          | -                  | -     | -     | -              | -     | -     | -               | -              | 1.633             | 1.697             | - | -   | -   | 0.0 |
| CGe <sub>2</sub>  | <i>P</i> $\bar{3}m1$ (164) | -                      | <i>P</i> $\bar{6}m2$ (187) | 6.25               | 6.26  | 60.0  | 60.0           | 6.19  | 6.19  | 60.0            | -              | 0.382             | 1.232             | - | 0.0 | 0.0 | -   |
| CPb <sub>2</sub>  | <i>P</i> $\bar{3}m1$ (164) | -                      | <i>P</i> $\bar{6}m2$ (187) | 7.28               | 7.29  | 59.9  | 59.9           | 7.15  | 7.16  | 59.8            | -              | 0.592             | 3.316             | - | 0.0 | 0.0 | -   |
| SiGe <sub>2</sub> | HXX                        | -                      | <i>P</i> $\bar{6}m2$ (187) | -                  | -     | -     | -              | 7.45  | 7.45  | 60.0            | -              | 0.902             | 1.448             | - | 0.0 | 0.0 | -   |
| SiSn <sub>2</sub> | HPX                        | -                      | <i>P</i> $\bar{6}m2$ (187) | -                  | -     | -     | -              | 8.03  | 8.04  | 59.5            | -              | 0.724             | 0.855             | - | 0.0 | 0.0 | 0.0 |
| SiPb <sub>2</sub> | HPT                        | -                      | <i>P</i> $\bar{6}m2$ (187) | 8.80               | 8.80  | 58.1  | 58.1           | 8.38  | 8.38  | 57.9            | -              | 0.653             | 0.740             | - | 0.0 | 0.0 | 0.0 |
| GeC <sub>2</sub>  | PXX                        | -                      | -                          | -                  | -     | -     | -              | -     | -     | -               | -              | 2.928             | 5.387             | - | -   | -   | 0.0 |
| GeGe <sub>2</sub> | HPX                        | -                      | <i>P</i> $\bar{6}m2$ (187) | -                  | -     | -     | -              | 7.72  | 7.73  | 60.0            | -              | 0.126             | 1.722             | - | 0.0 | 0.0 | 0.0 |
| GeSn <sub>2</sub> | HXX                        | -                      | <i>P</i> $\bar{6}m2$ (187) | -                  | -     | -     | -              | 8.21  | 8.23  | 60.0            | -              | 0.915             | 1.077             | - | 0.0 | 0.0 | -   |
| SnPb <sub>2</sub> | PHX                        | -                      | <i>P</i> $\bar{6}m2$ (187) | -                  | -     | -     | -              | 9.08  | 9.09  | 59.6            | -              | 0.438             | 1.695             | - | 0.0 | 0.0 | -   |
| PbGe <sub>2</sub> | TXX                        | <i>P</i> $\bar{1}$ (2) | -                          | 11.49              | 8.02  | 39.4  | -              | -     | -     | -               | -              | 0.906             | 3.153             | - | 0.0 | 0.0 | -   |

Table 42: List of XIV-XV

| species          | Initial structure indices | space group |       | lattice parameters |       |       |       |                |       | relative energy |       | spin moment    |                   |                   |   |   |     |
|------------------|---------------------------|-------------|-------|--------------------|-------|-------|-------|----------------|-------|-----------------|-------|----------------|-------------------|-------------------|---|---|-----|
|                  |                           | T           | H     | P                  | a [Å] | b [Å] | c [Å] | $\gamma$ [deg] | a [Å] | b [Å]           | c [Å] | $\gamma$ [deg] | $\Delta E_1$ [eV] | $\Delta E_2$ [eV] | T | H | P   |
| CP <sub>2</sub>  | HXX                       | -           | P1(1) | -                  | 5.87  | 5.85  | 60.9  | -              | -     | -               | -     | -              | 1.045             | 5.705             | - | - | -   |
| CB <sub>12</sub> | HXX                       | -           | Cm(8) | -                  | 7.08  | 6.99  | 75.4  | -              | -     | -               | -     | -              | 3.044             | 7.253             | - | - | -   |
| SiP <sub>2</sub> | PHX                       | -           | Cm(8) | -                  | 7.60  | 7.60  | 51.1  | -              | 7.44  | 8.45            | 41.2  | -              | 0.713             | 3.531             | - | - | 0.0 |
| PbN <sub>2</sub> | PXX                       | -           | P1(2) | -                  | -     | -     | -     | -              | 8.61  | 8.11            | 80.3  | -              | 17.363            | 17.365            | - | - | 0.0 |

Table 43: List of XIV-XVI

| species           | Initial structure indices | space group                        |                                    |                                    | lattice parameters |       |       |                |       |       | relative energy |                | spin moment       |                   |     |     |     |
|-------------------|---------------------------|------------------------------------|------------------------------------|------------------------------------|--------------------|-------|-------|----------------|-------|-------|-----------------|----------------|-------------------|-------------------|-----|-----|-----|
|                   |                           | T                                  | H                                  | P                                  | a [Å]              | b [Å] | c [Å] | $\gamma$ [deg] | a [Å] | b [Å] | c [Å]           | $\gamma$ [deg] | $\Delta E_1$ [eV] | $\Delta E_2$ [eV] | T   | H   | P   |
| CS <sub>2</sub>   | PXX                       | -                                  | -                                  | <i>P</i> 1(1)                      | -                  | -     | -     | -              | 11.20 | 10.63 | 100.3           | 2.451          | 2.971             | -                 | -   | -   | 0.0 |
| SiO <sub>2</sub>  | THP                       | <i>P</i> $\bar{3}$ <i>m</i> 1(164) | <i>P</i> $\bar{3}$ <i>m</i> 1(164) | <i>Amm</i> 2(38)                   | 5.41               | 5.41  | 60.0  | 60.0           | 8.79  | 4.95  | 92.6            | 0.010          | 0.562             | 0.0               | 0.0 | 0.0 | 0.0 |
| SiS <sub>2</sub>  | THX                       | <i>P</i> $\bar{3}$ <i>m</i> 1(164) | <i>P</i> $\bar{4}$ <i>m</i> 2(115) | -                                  | 6.62               | 6.62  | 60.0  | 45.1           | -     | -     | -               | 0.016          | 2.884             | 0.0               | 0.0 | -   | -   |
| GeO <sub>2</sub>  | THX                       | <i>P</i> $\bar{3}$ <i>m</i> 1(164) | <i>P</i> $\bar{3}$ <i>m</i> 1(164) | -                                  | 5.81               | 5.81  | 60.0  | 60.0           | -     | -     | -               | 0.005          | 2.317             | 0.0               | 0.0 | -   | -   |
| GeSe <sub>2</sub> | HTX                       | <i>P</i> $\bar{3}$ <i>m</i> 1(164) | <i>C</i> 222(21)                   | -                                  | 7.28               | 7.28  | 59.7  | 78.8           | -     | -     | -               | 0.394          | 1.030             | 0.0               | 0.0 | -   | -   |
| GeTe <sub>2</sub> | TPX                       | <i>P</i> $\bar{3}$ <i>m</i> 1(164) | -                                  | <i>P</i> $\bar{1}$ (2)             | 7.84               | 7.84  | 59.0  | -              | 9.44  | 9.40  | 69.4            | 0.284          | 0.953             | 0.0               | -   | -   | 0.0 |
| SnO <sub>2</sub>  | PXX                       | -                                  | -                                  | <i>P</i> $\bar{3}$ <i>m</i> 1(164) | -                  | -     | -     | -              | 6.18  | 6.19  | 60.1            | 2.221          | 2.222             | -                 | -   | -   | 0.0 |
| SnS <sub>2</sub>  | TXX                       | -                                  | -                                  | -                                  | 7.46               | 7.46  | 60.0  | -              | -     | -     | -               | 1.498          | 3.010             | 0.0               | -   | -   | -   |
| PbO <sub>2</sub>  | TPX                       | -                                  | -                                  | <i>P</i> $\bar{3}$ <i>m</i> 1(164) | 6.88               | 6.88  | 60.0  | -              | 6.88  | 6.88  | 59.9            | 0.006          | 4.286             | 0.0               | -   | -   | 0.0 |
| PbS <sub>2</sub>  | PXX                       | -                                  | -                                  | <i>P</i> 1(1)                      | -                  | -     | -     | -              | 8.63  | 8.17  | 84.5            | 2.214          | 2.219             | -                 | -   | -   | 0.0 |
| PbSe <sub>2</sub> | PXX                       | -                                  | -                                  | <i>P</i> 1(1)                      | -                  | -     | -     | -              | 10.24 | 8.22  | 73.1            | 1.315          | 3.941             | -                 | -   | -   | 0.0 |

Table 44: List of XIV-XVII

| species           | Initial structure indices | space group        |              |                    | lattice parameters |       |       |                |       |       | relative energy |                | spin moment       |                   |       |     |     |     |
|-------------------|---------------------------|--------------------|--------------|--------------------|--------------------|-------|-------|----------------|-------|-------|-----------------|----------------|-------------------|-------------------|-------|-----|-----|-----|
|                   |                           | T                  | H            | P                  | a [Å]              | b [Å] | c [Å] | $\gamma$ [deg] | a [Å] | b [Å] | c [Å]           | $\gamma$ [deg] | $\Delta E_1$ [eV] | $\Delta E_2$ [eV] | T     | H   | P   |     |
| CBr <sub>2</sub>  | PTH                       | $P\bar{1}(1)$      | $Pmm2_1(31)$ | $Pc(\bar{7})$      | 8.51               | 8.37  | 66.6  | 8.16           | 8.17  | 72.3  | 10.68           | 10.70          | 103.8             | 0.047             | 0.084 | 0.0 | 0.0 | 0.0 |
| SiCl <sub>2</sub> | TPH                       | $P\bar{1}(2)$      | $Amm2(38)$   | $P\bar{1}(2)$      | 7.11               | 9.49  | 72.3  | 8.64           | 8.69  | 86.9  | 8.82            | 9.42           | 93.9              | 0.153             | 0.713 | 0.0 | 0.0 | 0.0 |
| SiBr <sub>2</sub> | TPX                       | $P\bar{1}(2)$      | -            | $P\bar{1}(1)$      | 9.79               | 7.24  | 65.0  | -              | -     | -     | 8.55            | 9.41           | 88.0              | 0.336             | 1.155 | 0.0 | -   | 0.0 |
| SiI <sub>2</sub>  | TPX                       | $P\bar{3}m1(164)$  | -            | $P\bar{1}(2)$      | 8.37               | 8.37  | 60.4  | -              | -     | -     | 10.77           | 8.54           | 91.5              | 0.482             | 0.976 | 0.0 | -   | 0.0 |
| GeCl <sub>2</sub> | TPX                       | $P\bar{3}m1(164)$  | -            | $P\bar{1}(1)$      | 7.86               | 7.86  | 60.6  | -              | -     | -     | 8.29            | 8.29           | 79.8              | 0.279             | 0.979 | 0.0 | -   | 0.0 |
| GeBr <sub>2</sub> | PTX                       | $P\bar{3}m1(164)$  | -            | $P\bar{3}m1(164)$  | 8.10               | 8.10  | 60.6  | -              | -     | -     | 8.16            | 7.06           | 90.0              | 0.045             | 1.381 | 0.0 | -   | 0.0 |
| SnCl <sub>2</sub> | TPX                       | $P\bar{2}_1/m(11)$ | -            | $P\bar{2}_1/m(11)$ | 8.91               | 8.91  | 57.2  | -              | -     | -     | 8.91            | 8.94           | 57.1              | 0.024             | 1.262 | 0.0 | -   | 0.0 |
| SnBr <sub>2</sub> | TPX                       | $P\bar{3}m1(164)$  | -            | $P\bar{1}(2)$      | 8.77               | 8.77  | 59.9  | -              | -     | -     | 8.88            | 8.41           | 75.8              | 0.806             | 1.045 | 0.0 | -   | 0.0 |
| SnI <sub>2</sub>  | PTX                       | $P\bar{3}m1(164)$  | -            | $P\bar{3}m1(164)$  | 9.18               | 9.18  | 59.7  | -              | -     | -     | 9.14            | 9.12           | 59.8              | 0.004             | 0.937 | 0.0 | -   | 0.0 |
| PbF <sub>2</sub>  | PTX                       | $P\bar{3}m1(164)$  | -            | $P\bar{3}m1(164)$  | 8.05               | 8.06  | 59.8  | -              | -     | -     | 8.06            | 8.07           | 59.6              | 0.013             | 1.893 | 0.0 | -   | 0.0 |
| PbCl <sub>2</sub> | TPX                       | $P\bar{3}m1(164)$  | -            | $P\bar{3}m1(164)$  | 8.81               | 8.81  | 59.9  | -              | -     | -     | 8.99            | 8.70           | 58.2              | 0.336             | 1.116 | 0.0 | -   | 0.0 |
| PbBr <sub>2</sub> | PTX                       | $P\bar{3}m1(164)$  | -            | $P\bar{3}m1(164)$  | 8.95               | 8.94  | 60.2  | -              | -     | -     | 8.94            | 8.94           | 59.9              | 0.004             | 0.939 | 0.0 | -   | 0.0 |
| PbI <sub>2</sub>  | PTX                       | $P\bar{3}m1(164)$  | -            | $P\bar{3}m1(164)$  | 9.33               | 9.33  | 59.4  | -              | -     | -     | 9.26            | 9.26           | 60.0              | 0.002             | 0.862 | 0.0 | -   | 0.0 |

Table 45: List of XIV-TM

| species           | Initial structure indices | space group       |                   | lattice parameters |       |       |                |       |       | relative energy   |                   | spin moment |      |     |
|-------------------|---------------------------|-------------------|-------------------|--------------------|-------|-------|----------------|-------|-------|-------------------|-------------------|-------------|------|-----|
|                   |                           | T                 | H                 | a [Å]              | b [Å] | c [Å] | $\gamma$ [deg] | a [Å] | b [Å] | $\Delta E_1$ [eV] | $\Delta E_2$ [eV] | T           | H    | P   |
| CT <sub>12</sub>  | TXX                       | $P\bar{3}m1(164)$ | —                 | 6.10               | 6.11  | 60.0  | —              | —     | —     | 4.952             | 12.161            | 7.7         | —    | —   |
| CV <sub>2</sub>   | TXX                       | $P\bar{3}m1(164)$ | —                 | 5.76               | 5.77  | 60.0  | —              | —     | —     | 3.652             | 4.154             | 0.0         | —    | —   |
| CC <sub>2</sub>   | THX                       | $P\bar{3}m1(164)$ | $P\bar{6}m2(187)$ | 5.62               | 5.65  | 59.8  | —              | 5.27  | 5.26  | 0.352             | 7.427             | 0.0         | 0.0  | —   |
| CNi <sub>2</sub>  | TXX                       | $P\bar{3}m1(164)$ | —                 | 5.80               | 5.80  | 59.7  | —              | —     | —     | 2.230             | 2.701             | 0.0         | —    | —   |
| CY <sub>2</sub>   | THX                       | $P\bar{3}m1(164)$ | —                 | 7.10               | 7.11  | 60.1  | —              | 7.10  | 7.11  | 0.003             | 5.500             | 0.0         | 0.0  | —   |
| CNb <sub>2</sub>  | TXX                       | $P\bar{3}m1(164)$ | —                 | 6.25               | 6.26  | 60.0  | —              | —     | —     | 3.403             | 8.561             | 0.0         | —    | —   |
| CMo <sub>2</sub>  | HXX                       | —                 | $P\bar{6}m2(187)$ | —                  | —     | —     | —              | 5.73  | 5.71  | 0.933             | 6.554             | —           | 0.0  | —   |
| CTe <sub>2</sub>  | PXX                       | —                 | —                 | —                  | —     | —     | —              | —     | —     | 1.882             | 2.940             | —           | 0.0  | 0.0 |
| CRu <sub>2</sub>  | HXX                       | —                 | $P\bar{6}m2(187)$ | —                  | —     | —     | —              | 5.55  | 5.56  | 1.540             | 3.671             | —           | 0.0  | —   |
| CPd <sub>2</sub>  | TXX                       | —                 | —                 | 6.24               | 6.24  | 59.9  | —              | —     | —     | 1.217             | 1.591             | 0.0         | —    | —   |
| CAs <sub>2</sub>  | HTX                       | $P\bar{3}m1(164)$ | $P\bar{6}m2(187)$ | 6.42               | 6.43  | 59.6  | —              | 6.13  | 6.11  | 0.322             | 0.848             | 0.0         | 0.0  | —   |
| CHf <sub>2</sub>  | TXX                       | $P\bar{3}m1(164)$ | —                 | 6.42               | 6.43  | 60.1  | —              | —     | —     | 6.411             | 8.695             | 0.0         | —    | —   |
| CTa <sub>2</sub>  | TPX                       | $P\bar{3}m1(164)$ | —                 | 6.16               | 6.16  | 59.9  | —              | —     | —     | 0.107             | 3.898             | 0.0         | —    | 0.0 |
| CW <sub>2</sub>   | HXX                       | —                 | $P\bar{6}m2(187)$ | —                  | —     | —     | —              | 5.72  | 5.71  | 1.818             | 3.061             | —           | 0.0  | —   |
| CRe <sub>2</sub>  | HXX                       | —                 | $P\bar{6}m2(187)$ | —                  | —     | —     | —              | 5.58  | 5.57  | 1.894             | 5.864             | —           | 0.0  | —   |
| CPt <sub>2</sub>  | HXX                       | —                 | $Cm(8)$           | —                  | —     | —     | —              | 5.73  | 5.37  | 1.432             | 2.786             | —           | 0.0  | —   |
| SiTi <sub>2</sub> | PXX                       | —                 | —                 | —                  | —     | —     | —              | —     | —     | 1.712             | 3.520             | —           | 0.0  | —   |
| SiCr <sub>2</sub> | HXX                       | —                 | $Cmnm(65)$        | —                  | —     | —     | —              | 4.84  | 6.22  | 2.504             | 5.007             | —           | 0.0  | —   |
| SiZr <sub>2</sub> | HPT                       | $C2/m(12)$        | $Cmnm(65)$        | 7.94               | 8.03  | 59.0  | —              | 5.96  | 7.48  | 0.030             | 0.736             | 0.0         | 0.0  | 0.0 |
| SiPd <sub>2</sub> | HPT                       | $P2_1/m(11)$      | $P\bar{6}m2(187)$ | 7.11               | 7.08  | 48.2  | —              | 6.11  | 6.11  | 0.083             | 0.668             | 0.0         | 0.0  | 0.0 |
| SiPt <sub>2</sub> | THX                       | $C2/m(12)$        | $P\bar{6}m2(187)$ | 6.46               | 6.49  | 52.7  | —              | 5.96  | 6.44  | 0.390             | 1.688             | 0.0         | 0.0  | —   |
| GeCr <sub>2</sub> | THX                       | $P2_1/m(11)$      | $P4/mnm(123)$     | 7.43               | 7.87  | 58.0  | —              | 5.95  | 8.44  | 0.593             | 2.554             | 31.9        | 32.5 | —   |
| GePd <sub>2</sub> | PTH                       | $P2_1/m(11)$      | $P\bar{6}m2(187)$ | 7.57               | 7.59  | 45.3  | —              | 6.11  | 6.11  | 0.230             | 0.630             | 0.0         | 0.0  | 0.0 |
| GePt <sub>2</sub> | HXX                       | —                 | $P\bar{6}m2(187)$ | —                  | —     | —     | —              | 5.95  | 5.97  | 0.991             | 2.490             | —           | 0.0  | —   |
| GeAu <sub>2</sub> | THX                       | $P2_1/m(11)$      | $Pmn2_1(31)$      | 7.84               | 7.85  | 42.0  | —              | 7.78  | 7.78  | 0.120             | 1.981             | 0.0         | 0.0  | —   |
| SnV <sub>2</sub>  | HXX                       | —                 | $P1(2)$           | —                  | —     | —     | —              | 5.42  | 9.17  | 11.665            | 12.496            | —           | 0.0  | —   |
| SnCr <sub>2</sub> | HTX                       | $P2_1/m(11)$      | $C2/m(12)$        | 8.19               | 8.23  | 45.0  | —              | 7.40  | 8.58  | 0.589             | 1.785             | 34.3        | 33.5 | —   |
| SnY <sub>2</sub>  | PXX                       | —                 | —                 | —                  | —     | —     | —              | —     | —     | 2.673             | 3.095             | —           | —    | 0.7 |
| PbSe <sub>2</sub> | PXX                       | —                 | —                 | —                  | —     | —     | —              | —     | —     | 2.664             | 6.488             | —           | —    | 0.0 |

Table 46: List of XV-I

| species           | Initial structure indices | space group       |            | lattice parameters |       |       |                |                   |                   | relative energy |       | spin moment |                |       |       |       |     |
|-------------------|---------------------------|-------------------|------------|--------------------|-------|-------|----------------|-------------------|-------------------|-----------------|-------|-------------|----------------|-------|-------|-------|-----|
|                   |                           | T                 | H          | P                  | T     | H     | P              | $\Delta E_1$ [eV] | $\Delta E_2$ [eV] | T               | H     | P           |                |       |       |       |     |
|                   |                           | a [Å]             | b [Å]      | $\gamma$ [deg]     | a [Å] | b [Å] | $\gamma$ [deg] | a [Å]             | b [Å]             | $\gamma$ [deg]  | a [Å] | b [Å]       | $\gamma$ [deg] |       |       |       |     |
| NLi <sub>2</sub>  | TPX                       | $P\bar{3}m1(164)$ | -          | $P\bar{3}m1(164)$  | 6.31  | 6.33  | 59.6           | -                 | -                 | -               | 6.28  | 6.31        | 60.0           | 0.001 | 1.793 | 4.0   | 4.0 |
| NNa <sub>2</sub>  | PTX                       | $P\bar{3}m1(164)$ | -          | $P\bar{3}m1(164)$  | 7.55  | 7.57  | 59.3           | -                 | -                 | -               | 7.53  | 7.54        | 59.5           | 0.044 | 1.432 | 4.0   | 4.0 |
| NK <sub>2</sub>   | TXX                       | $P\bar{3}m1(164)$ | -          | $P\bar{3}m1(164)$  | 8.68  | 8.68  | 58.5           | -                 | -                 | -               | -     | -           | -              | 0.972 | 3.156 | 4.0   | -   |
| NRB <sub>2</sub>  | TXX                       | $P\bar{3}m1(164)$ | -          | $P\bar{3}m1(164)$  | 9.12  | 9.12  | 57.1           | -                 | -                 | -               | -     | -           | -              | 0.850 | 1.934 | 4.1   | -   |
| NCS <sub>2</sub>  | TPX                       | $P\bar{3}m1(164)$ | -          | $P\bar{3}m1(164)$  | 9.48  | 9.47  | 56.1           | -                 | -                 | -               | 9.40  | 9.14        | 58.2           | 0.029 | 1.020 | 4.1   | 4.0 |
| PLi <sub>2</sub>  | TXX                       | $C2/m(12)$        | -          | $C2/m(12)$         | 8.24  | 8.01  | 42.9           | -                 | -                 | -               | -     | -           | -              | 1.238 | 3.853 | 0.0   | -   |
| PNa <sub>2</sub>  | TXX                       | $C2/m(12)$        | -          | $C2/m(12)$         | 9.39  | 9.01  | 43.0           | -                 | -                 | -               | -     | -           | -              | 0.865 | 2.517 | 0.0   | -   |
| PK <sub>2</sub>   | PTX                       | $P\bar{3}m1(164)$ | -          | $P\bar{3}m1(164)$  | 10.24 | 10.24 | 58.2           | -                 | -                 | -               | 10.09 | 10.08       | 59.5           | 0.031 | 1.049 | 4.0   | 4.0 |
| PRb <sub>2</sub>  | TPX                       | $P\bar{3}m1(164)$ | -          | $P\bar{3}m1(164)$  | 10.75 | 10.76 | 58.1           | -                 | -                 | -               | 10.20 | 10.44       | 60.0           | 0.295 | 0.931 | 4.0   | 4.0 |
| PCs <sub>2</sub>  | PTX                       | $P\bar{3}m1(164)$ | -          | $P\bar{3}m1(164)$  | 11.24 | 11.25 | 58.4           | -                 | -                 | -               | 11.05 | 11.06       | 59.4           | 0.013 | 0.944 | 4.0   | 4.0 |
| AsRb <sub>2</sub> | HXX                       | -                 | $Cmmm(65)$ | -                  | -     | -     | -              | 9.67              | 12.74             | 36.5            | -     | -           | -              | 2.480 | 2.557 | -     | 0.0 |
| AsCs <sub>2</sub> | TPX                       | $P\bar{3}m1(164)$ | -          | $P\bar{3}m1(164)$  | 11.37 | 11.31 | 59.6           | -                 | -                 | -               | 11.44 | 11.32       | 58.7           | 0.116 | 0.844 | 4.0   | 4.0 |
| SbLi <sub>2</sub> | THX                       | $P\bar{1}(2)$     | -          | $P\bar{1}(2)$      | 9.10  | 9.50  | 41.1           | -                 | -                 | -               | 9.25  | 9.22        | 41.5           | -     | 0.694 | 2.421 | 0.0 |
| SbK <sub>2</sub>  | HPX                       | -                 | $Am2(38)$  | -                  | -     | -     | -              | 10.75             | 11.36             | 43.9            | -     | -           | -              | 0.737 | 0.960 | -     | 0.0 |
| SbRb <sub>2</sub> | HXX                       | -                 | $Pm(6)$    | -                  | -     | -     | -              | 10.78             | 11.48             | 45.7            | -     | -           | -              | 1.195 | 2.554 | -     | 0.0 |
| SbCs <sub>2</sub> | HXX                       | -                 | $Am2(38)$  | -                  | -     | -     | -              | 11.27             | 11.95             | 44.4            | -     | -           | -              | 1.231 | 1.308 | -     | 0.0 |
| BLi <sub>2</sub>  | THX                       | $P\bar{1}(2)$     | -          | $P\bar{1}(2)$      | 10.13 | 9.04  | 39.2           | -                 | -                 | -               | 9.50  | 9.45        | 41.8           | 0.802 | 2.355 | 0.0   | 0.0 |
| BIRb <sub>2</sub> | HXX                       | -                 | $Pmmm(47)$ | -                  | -     | -     | -              | 9.43              | 9.69              | 58.6            | -     | -           | -              | 1.483 | 2.678 | -     | 0.0 |
| BIRb <sub>2</sub> | HXX                       | -                 | $Pmmm(47)$ | -                  | -     | -     | -              | 9.89              | 12.97             | 39.9            | -     | -           | -              | 1.454 | 2.790 | -     | 0.0 |
| BiCs <sub>2</sub> | HXX                       | -                 | $Pm(6)$    | -                  | -     | -     | -              | 11.35             | 12.72             | 42.6            | -     | -           | -              | 1.364 | 2.997 | -     | 0.0 |

Table 47: List of XV-II

| species           | Initial structure indices | space group       |   |               | lattice parameters |       |       |                |       |       | relative energy |                |                   | spin moment       |       |        |     |   |     |
|-------------------|---------------------------|-------------------|---|---------------|--------------------|-------|-------|----------------|-------|-------|-----------------|----------------|-------------------|-------------------|-------|--------|-----|---|-----|
|                   |                           | T                 | H | P             | a [Å]              | b [Å] | c [Å] | $\gamma$ [deg] | a [Å] | b [Å] | c [Å]           | $\gamma$ [deg] | $\Delta E_1$ [eV] | $\Delta E_2$ [eV] | T     | H      | P   |   |     |
| NBe <sub>2</sub>  | TPX                       | $C2/m(12)$        | — | $P\bar{1}(2)$ | 4.94               | 4.95  | —     | 64.7           | —     | —     | —               | 7.86           | 7.35              | 40.1              | 0.427 | 2.340  | 0.0 | — | 0.0 |
| NCa <sub>2</sub>  | TXX                       | $P\bar{3}m1(164)$ | — | —             | 7.22               | 7.22  | —     | 60.0           | —     | —     | —               | —              | —                 | —                 | 2.863 | 3.023  | 0.0 | — | —   |
| NSr <sub>2</sub>  | TXX                       | $P\bar{3}m1(164)$ | — | —             | 7.71               | 7.71  | —     | 60.0           | —     | —     | —               | —              | —                 | —                 | 2.541 | 4.094  | 0.0 | — | —   |
| PBe <sub>2</sub>  | PXX                       | —                 | — | $P3m1(156)$   | —                  | —     | —     | —              | —     | —     | —               | 3.99           | 6.92              | 90.0              | 2.887 | 4.350  | —   | — | 0.0 |
| PCa <sub>2</sub>  | PTX                       | $P\bar{3}m1(164)$ | — | $C2/m(12)$    | 8.42               | 8.42  | —     | 59.9           | —     | —     | —               | 8.45           | 8.47              | 59.9              | 0.082 | 1.612  | 0.0 | — | 0.0 |
| PSr <sub>2</sub>  | PTX                       | $P\bar{3}m1(164)$ | — | $P2_1/m(11)$  | 8.94               | 8.94  | —     | 59.4           | —     | —     | —               | 8.93           | 8.92              | 59.7              | 0.005 | 1.668  | 0.0 | — | 0.0 |
| PBa <sub>2</sub>  | PTX                       | $P\bar{3}m1(164)$ | — | $P3m1(164)$   | 9.32               | 9.31  | —     | 59.4           | —     | —     | —               | 9.26           | 12.25             | 40.9              | 0.103 | 1.678  | 0.0 | — | 2.6 |
| AsCa <sub>2</sub> | PTX                       | $P\bar{3}m1(164)$ | — | $Cm(8)$       | 8.66               | 8.68  | —     | 59.8           | —     | —     | —               | 8.71           | 8.73              | 59.6              | 0.154 | 1.572  | 0.0 | — | 0.0 |
| AsSr <sub>2</sub> | PTX                       | $P\bar{3}m1(164)$ | — | $P2_1/m(11)$  | 9.11               | 9.12  | —     | 60.0           | —     | —     | —               | 9.13           | 9.21              | 59.6              | 0.033 | 1.587  | 0.0 | — | 1.8 |
| AsBa <sub>2</sub> | TPX                       | $P\bar{3}m1(164)$ | — | $P2_1/m(11)$  | 9.46               | 9.52  | —     | 60.2           | —     | —     | —               | 9.67           | 9.56              | 59.2              | 0.018 | 1.636  | 0.0 | — | 0.1 |
| SbCa <sub>2</sub> | PTX                       | $C2/m(12)$        | — | $P2_1/m(12)$  | 9.29               | 9.28  | —     | 60.5           | —     | —     | —               | 9.38           | 9.31              | 59.7              | 0.075 | 1.341  | 0.0 | — | 1.4 |
| SbSr <sub>2</sub> | PTX                       | $C2/m(12)$        | — | $C2/m(12)$    | 9.82               | 9.78  | —     | 60.4           | —     | —     | —               | 9.78           | 9.90              | 59.3              | 0.004 | 1.210  | 0.0 | — | 0.0 |
| SbBa <sub>2</sub> | TXX                       | $P\bar{3}m1(164)$ | — | —             | 10.03              | 10.07 | —     | 59.9           | —     | —     | —               | —              | —                 | —                 | 1.313 | 6.828  | 0.0 | — | —   |
| BiBe <sub>2</sub> | PTX                       | $P\bar{1}(2)$     | — | $P\bar{1}(2)$ | 5.67               | 7.92  | —     | 66.9           | —     | —     | —               | 5.31           | 8.06              | 53.2              | 0.032 | 10.589 | 0.0 | — | 0.0 |
| BiCa <sub>2</sub> | TPX                       | $C2/m(12)$        | — | $C2/m(12)$    | 9.52               | 9.42  | —     | 59.6           | —     | —     | —               | 9.41           | 9.44              | 60.7              | 0.001 | 1.141  | 0.0 | — | 0.0 |
| BiSr <sub>2</sub> | TPX                       | $C2/m(12)$        | — | $P\bar{1}(2)$ | 10.03              | 9.93  | —     | 59.8           | —     | —     | —               | 9.92           | 10.01             | 59.9              | 0.009 | 1.115  | 0.0 | — | 0.0 |
| BiBa <sub>2</sub> | TPX                       | $P3m1(164)$       | — | $P2_1/m(11)$  | 10.20              | 10.20 | —     | 59.7           | —     | —     | —               | 10.36          | 10.18             | 60.7              | 0.022 | 1.152  | 0.0 | — | 0.0 |



Table 48: List of XV-XII

| species           | Initial structure indices |                  | space group |                  | lattice parameters |       |       |                |       |       | relative energy |                | spin moment       |                   |   |     |     |
|-------------------|---------------------------|------------------|-------------|------------------|--------------------|-------|-------|----------------|-------|-------|-----------------|----------------|-------------------|-------------------|---|-----|-----|
|                   | T                         | H                | H           | P                | a [Å]              | b [Å] | c [Å] | $\gamma$ [deg] | a [Å] | b [Å] | c [Å]           | $\gamma$ [deg] | $\Delta E_1$ [eV] | $\Delta E_2$ [eV] | T | H   | P   |
| PCd <sub>2</sub>  | -                         | <i>Acm2</i> (39) | -           | <i>C2/m</i> (12) | -                  | 7.24  | 7.25  | 63.0           | 8.33  | 11.24 | 11.24           | 55.2           | 0.111             | 1.459             | - | 0.0 | 0.0 |
| SbCd <sub>2</sub> | -                         | -                | -           | <i>P2/c</i> (13) | -                  | -     | -     | -              | 11.86 | 9.43  | 9.43            | 39.4           | 1.297             | 3.037             | - | -   | 0.0 |
| BiHg <sub>2</sub> | -                         | <i>Amm2</i> (38) | -           | -                | 10.97              | 10.95 | 33.0  | -              | -     | -     | -               | -              | 0.957             | 1.721             | - | 0.0 | -   |

Table 49: List of XV-XIII

| species           | Initial structure indices |                               | space group |                     | lattice parameters |       |       |                |       |       | relative energy |                | spin moment       |                   |     |     |     |
|-------------------|---------------------------|-------------------------------|-------------|---------------------|--------------------|-------|-------|----------------|-------|-------|-----------------|----------------|-------------------|-------------------|-----|-----|-----|
|                   | T                         | H                             | T           | H                   | a [Å]              | b [Å] | c [Å] | $\gamma$ [deg] | a [Å] | b [Å] | c [Å]           | $\gamma$ [deg] | $\Delta E_1$ [eV] | $\Delta E_2$ [eV] | T   | H   | P   |
| NAI <sub>2</sub>  | -                         | <i>Fmm2</i> <sub>1</sub> (31) | -           | <i>P</i>            | -                  | -     | -     | -              | -     | -     | -               | -              | 3.125             | 4.334             | -   | -   | -   |
| PAI <sub>2</sub>  | -                         | <i>P1</i> (1)                 | -           | <i>P2/c</i> (13)    | 5.34               | 5.34  | -     | 65.7           | 7.55  | 6.17  | -               | 72.3           | 0.725             | 0.921             | -   | 0.0 | 0.0 |
| PTI <sub>2</sub>  | <i>P3m1</i> (164)         | <i>P6m2</i> (187)             | 8.73        | <i>P1</i> (2)       | 7.23               | 6.55  | -     | 60.2           | 8.33  | 8.33  | 59.5            | 76.7           | 0.359             | 0.726             | 0.0 | 0.0 | 0.0 |
| SbI <sub>2</sub>  | -                         | <i>Armm2</i> (38)             | -           | -                   | 9.02               | 9.00  | -     | 43.2           | 9.18  | 7.67  | -               | -              | 0.937             | 3.263             | -   | 0.0 | -   |
| SbTl <sub>2</sub> | -                         | <i>Armm2</i> (38)             | -           | <i>P2/c</i> (13)    | 9.69               | 9.65  | -     | 41.1           | 9.76  | 7.23  | -               | 68.4           | 0.209             | 1.189             | -   | 0.0 | 0.0 |
| BaI <sub>2</sub>  | <i>P3m1</i> (164)         | <i>P6m2</i> (187)             | 8.84        | <i>P6/mmm</i> (191) | 8.63               | 8.60  | 59.7  | 58.5           | 10.25 | 10.25 | 62.2            | 62.2           | 0.564             | 0.719             | 0.0 | 0.0 | 0.0 |
| BiI <sub>2</sub>  | -                         | <i>Armm2</i> (38)             | -           | -                   | 9.32               | 9.28  | -     | 42.6           | -     | -     | -               | -              | 1.375             | 2.254             | -   | 0.0 | -   |
| BiTl <sub>2</sub> | -                         | <i>Armm2</i> (38)             | -           | -                   | 9.88               | 9.86  | -     | 41.5           | -     | -     | -               | -              | 1.495             | 1.525             | -   | 0.0 | -   |

Table 50: List of XV-XIV

| species           | Initial structure indices | space group  |              |              | lattice parameters |       |       |                |       |       | relative energy |                | spin moment       |                   |     |     |     |
|-------------------|---------------------------|--------------|--------------|--------------|--------------------|-------|-------|----------------|-------|-------|-----------------|----------------|-------------------|-------------------|-----|-----|-----|
|                   |                           | T            | H            | P            | a [Å]              | b [Å] | c [Å] | $\gamma$ [deg] | a [Å] | b [Å] | c [Å]           | $\gamma$ [deg] | $\Delta E_1$ [eV] | $\Delta E_2$ [eV] | T   | H   | P   |
| NC <sub>2</sub>   | PXX                       | —            | —            | $P1(1)$      | —                  | —     | —     | —              | 5.22  | 5.51  | 5.134           | 86.1           | 10.406            | —                 | —   | —   | 0.0 |
| NS <sub>2</sub>   | HTP                       | $Pc(7)$      | $Cm(8)$      | $P1(1)$      | 5.53               | 5.65  | 60.7  | 59.9           | 8.28  | 7.51  | 0.007           | 59.9           | 0.722             | 0.0               | 0.0 | 0.0 | 0.0 |
| NPb <sub>2</sub>  | $P3m1(164)$               | $Cm(8)$      | $Cm(8)$      | $P2_1/m(11)$ | 6.97               | 6.97  | 59.6  | 61.1           | 8.87  | 8.87  | 0.027           | 47.5           | 0.306             | 0.0               | 0.0 | 0.0 | 0.0 |
| PSi <sub>2</sub>  | PXX                       | —            | —            | $P2_1/m(11)$ | —                  | —     | —     | —              | 8.81  | 8.81  | 1.687           | 49.0           | 4.190             | —                 | —   | —   | 0.0 |
| PGe <sub>2</sub>  | PHT                       | $P2_1/m(11)$ | $P6m2(187)$  | $Cm(8)$      | 6.75               | 6.75  | 59.4  | 58.4           | 8.92  | 8.89  | 0.002           | 52.0           | 0.320             | 0.0               | 0.0 | 0.0 | 0.0 |
| PSn <sub>2</sub>  | THX                       | $P3m1(164)$  | $P6m2(187)$  | —            | 7.39               | 7.39  | 59.6  | 59.9           | 7.52  | —     | 0.222           | —              | 1.592             | 0.0               | 0.0 | —   | —   |
| PPb <sub>2</sub>  | THX                       | $P3m1(164)$  | $P6m2(187)$  | —            | 7.71               | 7.72  | 59.6  | 59.4           | 7.93  | —     | 0.271           | —              | 1.080             | 0.0               | 0.0 | —   | —   |
| AsSn <sub>2</sub> | PTH                       | $P3m1(156)$  | $P3m1(156)$  | $P1(2)$      | 7.43               | 7.39  | 59.4  | 59.2           | 7.89  | 7.88  | —               | —              | 0.233             | 0.0               | 0.0 | —   | —   |
| BiSi <sub>2</sub> | PTX                       | $P1(2)$      | —            | $P2_1/m(11)$ | 10.50              | 13.65 | 30.6  | —              | —     | —     | —               | —              | 6.198             | 0.0               | 0.0 | —   | —   |
| BiGe <sub>2</sub> | PXX                       | —            | —            | $Pc(7)$      | —                  | —     | —     | —              | 10.82 | 7.27  | 1.002           | 47.6           | 2.791             | —                 | —   | —   | 0.0 |
| BiPb <sub>2</sub> | THP                       | $P1(2)$      | $Pmn2_1(31)$ | $P1(1)$      | 11.60              | 12.02 | 33.3  | 53.9           | 9.73  | 9.74  | 0.090           | 50.7           | 0.223             | 0.0               | 0.0 | 0.0 | 0.0 |

Table 51: List of XV-XV

| species           | Initial structure indices | space group |       | lattice parameters |       |       |       |                |       | relative energy |       | spin moment       |                   |        |     |     |     |
|-------------------|---------------------------|-------------|-------|--------------------|-------|-------|-------|----------------|-------|-----------------|-------|-------------------|-------------------|--------|-----|-----|-----|
|                   |                           | T           | H     | T                  | a [Å] | b [Å] | c [Å] | $\gamma$ [deg] | a [Å] | b [Å]           | P     | $\Delta E_1$ [eV] | $\Delta E_2$ [eV] | T      | H   | P   |     |
| NBi <sub>2</sub>  | HTP                       | P1(1)       | Pc(7) | P1(1)              | 7.90  | 6.84  | 53.8  | 6.58           | 7.43  | 59.5            | 11.59 | 10.80             | 0.405             | 0.811  | 0.0 | 0.0 | 0.0 |
| PP <sub>2</sub>   | HPX                       | -           | P1(1) | P1(1)              | -     | -     | -     | 6.57           | 6.49  | 60.8            | 7.52  | 7.88              | 0.183             | 2.348  | -   | 0.0 | 0.0 |
| SbBi <sub>2</sub> | PTX                       | P1(1)       | -     | P1(1)              | 9.16  | 9.21  | 41.9  | -              | -     | -               | 9.81  | 9.91              | 0.195             | 2.661  | 0.0 | -   | 0.0 |
| BiP <sub>2</sub>  | PXX                       | -           | -     | P1(2)              | -     | -     | -     | -              | -     | -               | 9.70  | 7.16              | 1.029             | 10.019 | -   | -   | 0.0 |
| BiB <sub>2</sub>  | TPX                       | P1(2)       | -     | P1(1)              | 8.12  | 12.03 | 72.0  | -              | -     | -               | 8.98  | 12.04             | 0.133             | 2.147  | 0.0 | -   | 0.0 |

Table 52: List of XV-XVI

| species           | Initial structure indices | space group       |         | lattice parameters |       |       |                |                |                | relative energy   |                   | spin moment |     |     |
|-------------------|---------------------------|-------------------|---------|--------------------|-------|-------|----------------|----------------|----------------|-------------------|-------------------|-------------|-----|-----|
|                   |                           | T                 | H       | a [Å]              | b [Å] | c [Å] | $\gamma$ [deg] | $\gamma$ [deg] | $\gamma$ [deg] | $\Delta E_1$ [eV] | $\Delta E_2$ [eV] | T           | H   | P   |
| PS <sub>2</sub>   | TXX                       | $P\bar{3}m1(164)$ | -       | 6.59               | 6.59  | 60.0  | -              | -              | -              | 1.396             | 1.559             | 0.0         | -   | -   |
| PSe <sub>2</sub>  | TXX                       | $P\bar{3}m1(164)$ | -       | 6.99               | 6.99  | 60.0  | -              | -              | -              | 0.943             | 2.920             | 0.0         | -   | -   |
| PTe <sub>2</sub>  | TXX                       | $P\bar{3}m1(164)$ | -       | 7.50               | 7.51  | 59.8  | -              | -              | -              | 1.708             | 1.971             | 0.0         | -   | -   |
| AsS <sub>2</sub>  | TPX                       | $P\bar{3}m1(164)$ | -       | 7.00               | 7.01  | 59.5  | -              | -              | 6.59           | 0.402             | 3.003             | 0.0         | -   | 0.0 |
| AsSe <sub>2</sub> | TXX                       | $P\bar{3}m1(164)$ | -       | 7.33               | 7.34  | 59.3  | -              | -              | -              | 1.864             | 1.925             | 0.0         | -   | -   |
| AsTe <sub>2</sub> | TXX                       | $P\bar{3}m1(164)$ | -       | 7.81               | 7.78  | 58.8  | -              | -              | -              | 1.290             | 1.502             | 0.0         | -   | -   |
| SbS <sub>2</sub>  | TPX                       | $P\bar{3}m1(164)$ | -       | 7.58               | 7.58  | 59.7  | -              | -              | 12.71          | 0.467             | 2.805             | 0.0         | -   | 0.0 |
| SbSe <sub>2</sub> | TXX                       | $P\bar{3}m1(164)$ | -       | 7.84               | 7.84  | 59.6  | -              | -              | -              | 0.925             | 2.376             | 0.0         | -   | -   |
| SbTe <sub>2</sub> | TXX                       | $P\bar{3}m1(164)$ | -       | 8.33               | 8.32  | 58.5  | -              | -              | -              | 1.259             | 1.772             | 0.0         | -   | -   |
| BiO <sub>2</sub>  | PXX                       | -                 | -       | -                  | -     | -     | -              | -              | -              | -                 | -                 | -           | -   | -   |
| BIS <sub>2</sub>  | PTX                       | $P\bar{3}m1(164)$ | -       | 7.87               | 7.86  | 59.6  | -              | -              | 7.52           | 0.895             | 3.859             | -           | -   | 0.0 |
| BISe <sub>2</sub> | PXX                       | $P2_1/m(11)$      | -       | -                  | -     | -     | -              | -              | 9.95           | 0.397             | 2.636             | 0.0         | -   | 0.0 |
| BiTe <sub>2</sub> | THX                       | $P\bar{3}m1(164)$ | $P1(1)$ | 8.59               | 8.59  | 56.1  | 51.3           | 9.56           | 10.21          | 0.884             | 2.750             | -           | -   | 0.0 |
|                   |                           |                   |         |                    |       |       |                |                |                | 0.370             | 0.993             | 0.0         | 0.0 | 0.0 |

Table 53: List of XV-XVII

| species           | Initial structure indices | space group   |                           | lattice parameters |       |       |       |                |       | relative energy |                | spin moment       |                   |     |     |   |
|-------------------|---------------------------|---------------|---------------------------|--------------------|-------|-------|-------|----------------|-------|-----------------|----------------|-------------------|-------------------|-----|-----|---|
|                   |                           | T             | H                         | P                  | a [Å] | b [Å] | c [Å] | $\gamma$ [deg] | a [Å] | b [Å]           | $\gamma$ [deg] | $\Delta E_1$ [eV] | $\Delta E_2$ [eV] | T   | H   | P |
| PCl <sub>2</sub>  | THX                       | <i>P</i> 1(2) | <i>P</i> c(7)             | -                  | 8.05  | 10.81 | 55.7  | 9.58           | 7.78  | 60.3            | -              | 0.248             | 3.548             | 0.0 | 0.0 | - |
| PI <sub>2</sub>   | HXX                       | -             | <i>P</i> 2/ <i>m</i> (10) | -                  | -     | -     | -     | 9.55           | 9.95  | 51.9            | -              | 2.502             | 2.885             | -   | 0.0 | - |
| SbBr <sub>2</sub> | HXX                       | -             | <i>P</i> <i>m</i> (6)     | -                  | -     | -     | -     | 8.58           | 8.89  | 55.8            | -              | 2.203             | 2.925             | -   | 0.0 | - |
| SbI <sub>2</sub>  | HXX                       | -             | <i>P</i> <i>m</i> (6)     | -                  | -     | -     | -     | 9.45           | 9.00  | 56.4            | -              | 1.739             | 2.914             | -   | 0.0 | - |
| BiCl <sub>2</sub> | HXX                       | -             | <i>P</i> <i>m</i> (6)     | -                  | -     | -     | -     | 8.48           | 7.95  | 64.7            | -              | 1.887             | 2.316             | -   | 0.0 | - |
| BiBr <sub>2</sub> | HXX                       | -             | <i>P</i> <i>m</i> (6)     | -                  | -     | -     | -     | 8.66           | 9.05  | 54.8            | -              | 1.745             | 2.808             | -   | 0.0 | - |
| BiI <sub>2</sub>  | HXX                       | -             | <i>P</i> <i>m</i> (6)     | -                  | -     | -     | -     | 9.05           | 8.79  | 62.4            | -              | 0.896             | 1.507             | -   | 0.0 | - |

Table 54: List of XV-TM

| species           | Initial structure indices | space group       |                    |               | lattice parameters |       |       |                |       |       | relative energy |                | spin moment       |                   |       |     |      |
|-------------------|---------------------------|-------------------|--------------------|---------------|--------------------|-------|-------|----------------|-------|-------|-----------------|----------------|-------------------|-------------------|-------|-----|------|
|                   |                           | T                 | H                  | P             | a [Å]              | b [Å] | c [Å] | $\gamma$ [deg] | a [Å] | b [Å] | c [Å]           | $\gamma$ [deg] | $\Delta E_1$ [eV] | $\Delta E_2$ [eV] | T     | H   | P    |
| NT <sub>2</sub>   | TXX                       | $P\bar{3}m1(164)$ | —                  | —             | 5.93               | 5.95  | 60.1  | —              | —     | —     | —               | 3.872          | 9.483             | 4.7               | —     | —   | —    |
| NV <sub>2</sub>   | TXX                       | $P\bar{3}m1(164)$ | —                  | —             | 5.75               | 5.76  | 60.0  | —              | —     | —     | —               | 1.010          | 1.398             | 0.0               | —     | —   | —    |
| NCr <sub>2</sub>  | THX                       | $P\bar{3}m1(164)$ | $P\bar{6}m2(187)$  | —             | 5.67               | 5.67  | 60.7  | 59.6           | 5.25  | 5.22  | —               | 0.144          | 3.984             | 7.2               | 0.0   | —   | —    |
| NNi <sub>2</sub>  | TPX                       | $P\bar{3}m1(164)$ | —                  | $Cmmm(65)$    | 5.64               | 5.65  | 59.5  | —              | —     | —     | 9.50            | 0.040          | 0.850             | 0.0               | —     | —   | 0.0  |
| NY <sub>2</sub>   | THX                       | $P\bar{3}m1(164)$ | $P\bar{3}m1(164)$  | —             | 6.89               | 6.90  | 60.1  | 60.0           | 6.89  | 6.89  | —               | 0.002          | 7.381             | 0.0               | 0.0   | —   | —    |
| NZr <sub>2</sub>  | TXX                       | $P\bar{3}m1(164)$ | —                  | —             | 6.46               | 6.48  | 60.1  | —              | —     | —     | —               | 3.576          | 9.888             | 0.0               | —     | —   | —    |
| NNb <sub>2</sub>  | THX                       | $P\bar{3}m1(164)$ | $P\bar{6}m2(187)$  | —             | 6.29               | 6.29  | 60.1  | 59.9           | 5.86  | 5.84  | —               | 0.283          | 4.541             | 0.0               | 0.0   | —   | —    |
| NPd <sub>2</sub>  | PXX                       | —                 | —                  | $P2/c(13)$    | 6.34               | 6.36  | 60.1  | —              | —     | —     | 9.92            | 2.012          | 2.055             | —                 | —     | —   | 0.0  |
| NHf <sub>2</sub>  | TXX                       | $P\bar{3}m1(164)$ | —                  | —             | 6.16               | 6.17  | 60.0  | —              | —     | —     | —               | 3.563          | 4.401             | 0.0               | —     | —   | —    |
| NTa <sub>2</sub>  | HXX                       | $P\bar{3}m1(164)$ | $P\bar{6}m2(187)$  | —             | 5.79               | 5.78  | 59.9  | —              | —     | —     | —               | 0.657          | 2.060             | 0.0               | 0.0   | —   | —    |
| NOs <sub>2</sub>  | HXX                       | —                 | $Pm\bar{c}2_1(26)$ | —             | 5.43               | 5.43  | 41.2  | —              | —     | —     | —               | 2.289          | 3.111             | —                 | —     | —   | —    |
| NIr <sub>2</sub>  | HXX                       | —                 | $Pmm2_1(31)$       | —             | 5.28               | 5.44  | 59.1  | —              | —     | —     | —               | 1.975          | 4.578             | —                 | —     | —   | —    |
| NPt <sub>2</sub>  | HXX                       | —                 | $Pmm2_1(31)$       | —             | 5.85               | 5.39  | 57.2  | —              | —     | —     | —               | 1.617          | 2.099             | —                 | —     | —   | —    |
| PSc <sub>2</sub>  | PTX                       | $P2_1/m(11)$      | —                  | —             | 7.57               | 7.30  | 61.2  | —              | —     | —     | 7.55            | 0.000          | 2.459             | 0.0               | 0.0   | —   | —    |
| PTi <sub>2</sub>  | PXX                       | —                 | —                  | $P2_1/m(11)$  | —                  | —     | —     | —              | —     | —     | 7.28            | 0.856          | 3.023             | —                 | —     | —   | —    |
| PV <sub>2</sub>   | TXX                       | $P2_1/m(11)$      | —                  | —             | 6.91               | 6.13  | 63.4  | —              | —     | —     | —               | 3.931          | 5.400             | 0.0               | —     | —   | —    |
| PCr <sub>2</sub>  | TPX                       | $P2_1/m(11)$      | —                  | —             | 7.17               | 7.04  | 60.5  | —              | —     | —     | 6.76            | 0.187          | 2.486             | 27.8              | —     | —   | 27.4 |
| PMn <sub>2</sub>  | TXX                       | $P2_1/m(11)$      | —                  | $Pmmm(59)$    | 6.78               | 6.77  | 57.9  | —              | —     | —     | —               | 2.465          | 6.119             | 23.4              | —     | —   | —    |
| PFc <sub>2</sub>  | THX                       | $P\bar{3}m1(164)$ | $P\bar{6}m2(187)$  | —             | 7.94               | 7.94  | 60.0  | 59.9           | 5.69  | 5.67  | —               | 0.202          | 1.151             | 18.0              | 11.8  | —   | —    |
| PCo <sub>2</sub>  | TXX                       | $P2_1/m(11)$      | —                  | —             | 6.46               | 6.46  | 47.9  | —              | —     | —     | —               | 2.829          | 4.078             | 7.8               | —     | —   | —    |
| PNi <sub>2</sub>  | PTX                       | $P2_1/m(11)$      | —                  | —             | 6.63               | 6.63  | 58.5  | —              | —     | —     | 7.00            | 0.214          | 2.323             | 0.0               | 0.0   | —   | —    |
| PY <sub>2</sub>   | TPX                       | $P\bar{3}m1(164)$ | —                  | —             | 7.63               | 7.63  | 60.0  | —              | —     | —     | 7.64            | 0.037          | 2.802             | 0.0               | 0.0   | —   | —    |
| PNb <sub>2</sub>  | TXX                       | $P2_1/m(11)$      | —                  | —             | 6.68               | 7.58  | 63.8  | —              | —     | —     | —               | 2.057          | 4.823             | 0.0               | —     | —   | —    |
| PMo <sub>2</sub>  | TXX                       | $P2_1/m(11)$      | —                  | —             | 7.24               | 7.24  | 49.2  | —              | —     | —     | —               | 3.085          | 3.334             | 0.0               | —     | —   | —    |
| PTc <sub>2</sub>  | TXX                       | $P2_1/m(11)$      | —                  | —             | 7.10               | 5.63  | 66.6  | —              | —     | —     | —               | 3.599          | 7.906             | 0.0               | —     | —   | —    |
| PRu <sub>2</sub>  | TXX                       | $P2_1/m(11)$      | —                  | —             | 7.02               | 7.02  | 47.1  | —              | —     | —     | —               | 1.103          | 4.425             | 0.0               | —     | —   | —    |
| PRh <sub>2</sub>  | PTX                       | $P2_1/m(11)$      | —                  | —             | 7.21               | 6.95  | 58.7  | —              | —     | —     | 9.06            | 0.760          | 1.307             | 0.0               | 0.0   | —   | —    |
| PPd <sub>2</sub>  | PTX                       | $P2_1/m(11)$      | —                  | $P\bar{1}(2)$ | 7.19               | 7.19  | 60.5  | —              | —     | —     | 7.29            | 0.089          | 1.098             | 0.0               | 0.0   | —   | —    |
| PAg <sub>2</sub>  | HPX                       | —                 | $P2/c(13)$         | —             | —                  | —     | —     | —              | 7.99  | 7.19  | —               | 7.29           | 0.677             | 1.887             | —     | —   | —    |
| PHf <sub>2</sub>  | PTX                       | $P2_1/m(11)$      | —                  | $Cm(8)$       | 7.69               | 7.70  | 52.4  | —              | —     | —     | 7.91            | 8.54           | 61.8              | 0.077             | 1.660 | 0.0 | 0.0  |
| PPt <sub>2</sub>  | HXP                       | $P2_1/m(11)$      | $Pmm2_1(31)$       | $Pc(7)$       | 6.86               | 6.86  | 49.2  | —              | —     | —     | 7.83            | 6.91           | 63.8              | 0.060             | 0.541 | 0.0 | 0.0  |
| AsSe <sub>2</sub> | TPX                       | $P2_1/m(11)$      | —                  | $P2_1/m(11)$  | 7.89               | 7.47  | 61.3  | —              | —     | —     | 9.12            | 9.79           | 43.4              | 0.008             | 2.161 | 0.0 | 0.0  |
| AsTi <sub>2</sub> | HXX                       | —                 | $P2/c(13)$         | —             | —                  | —     | —     | —              | 6.16  | 8.05  | —               | —              | 5.888             | 8.074             | —     | —   | —    |
| AsV <sub>2</sub>  | TXX                       | $P2_1/m(11)$      | —                  | —             | 6.21               | 6.96  | 62.8  | —              | —     | —     | —               | 7.718          | 8.634             | 0.0               | —     | —   | —    |
| AsCr <sub>2</sub> | TXX                       | $P\bar{1}(2)$     | —                  | —             | 7.05               | 7.27  | 60.7  | —              | —     | —     | —               | 2.208          | 4.659             | 15.9              | —     | —   | —    |
| AsZr <sub>2</sub> | TPX                       | $P2_1/m(11)$      | —                  | —             | 8.17               | 8.22  | 51.8  | —              | —     | —     | 7.26            | 0.078          | 2.960             | 0.0               | 0.0   | —   | —    |
| AsPd <sub>2</sub> | HXP                       | $C2/m(12)$        | $Pmm2_1(31)$       | —             | 8.55               | 8.54  | 40.6  | 65.1           | 7.31  | 6.09  | —               | 8.60           | 0.242             | 0.782             | 0.0   | 0.0 | 0.0  |
| AsHf <sub>2</sub> | PTX                       | $P2_1/m(11)$      | —                  | $P2_1/m(11)$  | 6.99               | 8.10  | 64.3  | —              | —     | —     | 8.14            | 0.155          | 2.724             | 0.0               | 0.0   | —   | —    |
| SbV <sub>2</sub>  | HXX                       | —                 | $Pmm2_1(31)$       | —             | —                  | —     | —     | —              | 7.55  | 7.53  | 47.0            | —              | 4.077             | 4.090             | —     | —   | —    |
| SbPd <sub>2</sub> | HXX                       | —                 | $Pmm2_1(31)$       | —             | —                  | —     | —     | —              | 7.79  | 7.78  | 48.3            | —              | 0.833             | 1.455             | —     | —   | —    |
| BiSc <sub>2</sub> | TXX                       | —                 | —                  | —             | 8.76               | 8.31  | 62.9  | —              | —     | —     | —               | 1.271          | 3.748             | 1.8               | —     | —   | —    |
| BiV <sub>2</sub>  | HXX                       | —                 | $Pm(6)$            | —             | —                  | —     | —     | —              | 7.64  | 9.06  | 31.0            | —              | 13.294            | 13.298            | —     | —   | —    |
| BiY <sub>2</sub>  | TPX                       | $P2_1/m(11)$      | —                  | $Cm(8)$       | 9.36               | 8.46  | 63.0  | —              | —     | —     | 9.48            | 8.47           | 55.8              | 0.565             | 1.703 | 0.0 | 1.7  |
| BiRe <sub>2</sub> | HXX                       | —                 | $Aem2(39)$         | —             | —                  | —     | —     | —              | 10.43 | 10.45 | 23.7            | —              | 5.278             | 16.490            | —     | —   | —    |

Table 55: List of XVI-I

| species            | Initial structure indices | space group       |   |   | lattice parameters |       |       |                |       |       | relative energy |                |                   | spin moment       |                    |   |   |   |
|--------------------|---------------------------|-------------------|---|---|--------------------|-------|-------|----------------|-------|-------|-----------------|----------------|-------------------|-------------------|--------------------|---|---|---|
|                    |                           | T                 | H | P | a [Å]              | b [Å] | c [Å] | $\gamma$ [deg] | a [Å] | b [Å] | c [Å]           | $\gamma$ [deg] | $\Delta E_1$ [eV] | $\Delta E_2$ [eV] | $\mu_B$ /unit cell | T | H | P |
|                    |                           |                   |   |   |                    |       |       |                |       |       |                 |                |                   |                   |                    |   |   |   |
| OLi <sub>2</sub>   | TXX                       | $P\bar{3}m1(164)$ | - | - | 6.19               | 6.21  | 60.0  | -              | -     | -     | -               | 1.274          | 3.622             | 0.0               | -                  | - | - | - |
| ONa <sub>2</sub>   | TPX                       | $P\bar{3}m1(164)$ | - | - | 7.52               | 7.53  | 59.4  | -              | -     | -     | -               | 0.756          | 2.577             | 0.0               | -                  | - | - | - |
| OK <sub>2</sub>    | TPX                       | $P\bar{3}m1(164)$ | - | - | 8.26               | 8.27  | 59.3  | -              | -     | -     | -               | 0.294          | 1.823             | 0.0               | -                  | - | - | - |
| ORb <sub>2</sub>   | TXX                       | $P\bar{3}m1(164)$ | - | - | 8.36               | 8.36  | 59.7  | -              | -     | -     | -               | 1.533          | 1.866             | 0.0               | -                  | - | - | - |
| OCs <sub>2</sub>   | PTX                       | $C2/m(12)$        | - | - | 9.81               | 9.81  | 50.4  | -              | -     | -     | -               | 8.54           | 0.733             | 1.339             | 0.0                | - | - | - |
| SLi <sub>2</sub>   | TPX                       | $P\bar{3}m1(164)$ | - | - | 7.89               | 7.87  | 59.8  | -              | -     | -     | -               | 7.86           | 0.025             | 2.651             | 0.0                | - | - | - |
| SNa <sub>2</sub>   | PTX                       | $P\bar{3}m1(164)$ | - | - | 9.01               | 9.02  | 59.5  | -              | -     | -     | -               | 9.02           | 0.033             | 2.464             | 0.0                | - | - | - |
| SK <sub>2</sub>    | PTX                       | $P\bar{3}m1(164)$ | - | - | 10.17              | 10.17 | 57.5  | -              | -     | -     | -               | 9.92           | 0.063             | 1.948             | 0.0                | - | - | - |
| SRb <sub>2</sub>   | PTX                       | $P\bar{3}m1(164)$ | - | - | 10.37              | 10.37 | 59.1  | -              | -     | -     | -               | 10.21          | 0.019             | 1.635             | 0.0                | - | - | - |
| SCs <sub>2</sub>   | PTX                       | $P\bar{3}m1(164)$ | - | - | 10.67              | 10.69 | 58.8  | -              | -     | -     | -               | 10.51          | 0.020             | 1.312             | 0.0                | - | - | - |
| SelJ <sub>2</sub>  | TPX                       | $P\bar{3}m1(164)$ | - | - | 8.32               | 8.31  | 59.8  | -              | -     | -     | -               | 8.33           | 0.043             | 2.199             | 0.0                | - | - | - |
| SeNa <sub>2</sub>  | TXX                       | $P\bar{3}m1(164)$ | - | - | 9.39               | 9.40  | 59.6  | -              | -     | -     | -               | -              | 2.205             | 2.205             | 0.0                | - | - | - |
| SeK <sub>2</sub>   | PTX                       | $P\bar{3}m1(164)$ | - | - | 10.65              | 10.65 | 57.2  | -              | -     | -     | -               | 10.35          | 0.075             | 1.818             | 0.0                | - | - | - |
| SeRb <sub>2</sub>  | PTX                       | $P\bar{3}m1(164)$ | - | - | 10.88              | 10.87 | 58.8  | -              | -     | -     | -               | 10.72          | 0.015             | 1.665             | 0.0                | - | - | - |
| SeCs <sub>2</sub>  | PTX                       | $P\bar{3}m1(164)$ | - | - | 11.22              | 11.19 | 58.8  | -              | -     | -     | -               | 11.06          | 0.018             | 1.302             | 0.0                | - | - | - |
| TelLi <sub>2</sub> | PTX                       | $P\bar{3}m1(164)$ | - | - | 9.17               | 9.17  | 59.3  | -              | -     | -     | -               | 9.11           | 0.038             | 1.715             | 0.0                | - | - | - |
| TeNa <sub>2</sub>  | PTX                       | $P\bar{3}m1(164)$ | - | - | 10.19              | 10.20 | 59.5  | -              | -     | -     | -               | 10.21          | 0.005             | 2.006             | 0.0                | - | - | - |
| TeK <sub>2</sub>   | PTX                       | $P\bar{3}m1(164)$ | - | - | 11.31              | 11.33 | 58.6  | -              | -     | -     | -               | 11.19          | 0.013             | 1.709             | 0.0                | - | - | - |
| TeRb <sub>2</sub>  | PTX                       | $P\bar{3}m1(164)$ | - | - | 11.86              | 11.88 | 58.1  | -              | -     | -     | -               | 11.64          | 0.032             | 1.515             | 0.0                | - | - | - |
| TeCs <sub>2</sub>  | TXX                       | $P\bar{3}m1(164)$ | - | - | 12.04              | 12.14 | 59.4  | -              | -     | -     | -               | -              | 1.228             | 2.144             | 0.0                | - | - | - |



Table 56: List of XVI-II

| species           | Initial structure indices | space group       |   | lattice parameters |       |       |                |       |       | relative energy |                | spin moment       |                   |     |   |     |
|-------------------|---------------------------|-------------------|---|--------------------|-------|-------|----------------|-------|-------|-----------------|----------------|-------------------|-------------------|-----|---|-----|
|                   |                           | T                 | H | a [Å]              | b [Å] | c [Å] | $\gamma$ [deg] | a [Å] | b [Å] | c [Å]           | $\gamma$ [deg] | $\Delta E_1$ [eV] | $\Delta E_2$ [eV] | T   | H | P   |
| OB <sub>2</sub>   | TXX                       | $P2_1/m(11)$      | - | 5.17               | 4.95  | 58.5  | -              | -     | -     | -               | 1.114          | 3.420             | 0.0               | -   | - | -   |
| OMg <sub>2</sub>  | PTX                       | $P\bar{3}m1(164)$ | - | 6.14               | 6.14  | 59.2  | -              | 11.46 | 11.46 | 29.6            | 0.770          | 1.747             | 0.0               | -   | - | 0.0 |
| OCa <sub>2</sub>  | PXX                       | -                 | - | -                  | -     | -     | -              | 13.93 | 12.08 | 24.9            | 1.945          | 2.182             | -                 | -   | - | 0.0 |
| OST <sub>2</sub>  | PXX                       | -                 | - | -                  | -     | -     | -              | 13.71 | 12.22 | 27.0            | 1.619          | 2.157             | -                 | -   | - | 0.0 |
| OBa <sub>2</sub>  | PXX                       | -                 | - | -                  | -     | -     | -              | 9.20  | 9.19  | 59.2            | 2.125          | 2.135             | -                 | -   | - | 0.0 |
| SBe <sub>2</sub>  | PXX                       | -                 | - | -                  | -     | -     | -              | 6.83  | 5.30  | 90.0            | 2.333          | 4.987             | -                 | -   | - | 0.0 |
| SCa <sub>2</sub>  | THX                       | $P\bar{6}m2(187)$ | - | 7.82               | 7.81  | 60.0  | 7.73           | 7.73  | 59.8  | -               | 0.798          | 2.382             | 0.4               | 0.0 | - | -   |
| SSr <sub>2</sub>  | TXX                       | $P\bar{3}m1(164)$ | - | 8.35               | 8.35  | 59.7  | -              | -     | -     | -               | 0.977          | 2.337             | 0.0               | -   | - | -   |
| SBa <sub>2</sub>  | TXX                       | $P\bar{3}m1(164)$ | - | 8.84               | 8.84  | 59.6  | -              | -     | -     | -               | 1.845          | 2.529             | 0.0               | -   | - | -   |
| SeBe <sub>2</sub> | PXX                       | -                 | - | -                  | -     | -     | -              | 5.42  | 7.01  | 69.5            | 1.058          | 1.540             | -                 | -   | - | 0.0 |
| SeCa <sub>2</sub> | THX                       | $P\bar{6}m2(187)$ | - | 8.06               | 8.06  | 60.0  | 8.00           | 7.99  | 59.8  | -               | 0.534          | 1.206             | 0.0               | 0.0 | - | -   |
| SeSr <sub>2</sub> | THX                       | $P\bar{6}m2(187)$ | - | 8.59               | 8.58  | 59.5  | 8.53           | 8.53  | 59.4  | -               | 0.726          | 2.660             | 0.0               | 0.0 | - | -   |
| SeBa <sub>2</sub> | TXX                       | $P\bar{3}m1(164)$ | - | 9.11               | 9.10  | 59.5  | -              | -     | -     | -               | 1.546          | 1.697             | 0.0               | -   | - | -   |
| TeCa <sub>2</sub> | THX                       | $P2_1/m(11)$      | - | 8.45               | 9.16  | 62.8  | 8.41           | 8.37  | 59.7  | -               | 0.767          | 0.919             | 0.0               | 0.0 | - | -   |
| TeSr <sub>2</sub> | THX                       | $P\bar{6}m2(187)$ | - | 8.91               | 8.95  | 60.3  | 8.94           | 8.88  | 59.3  | -               | 0.500          | 2.067             | 0.0               | 0.0 | - | -   |

Table 57: List of XVI-XII

| species           | Initial structure |   | space group |         | lattice parameters |       |         | relative energy   |                   | spin moment |       |       |   |   |     |
|-------------------|-------------------|---|-------------|---------|--------------------|-------|---------|-------------------|-------------------|-------------|-------|-------|---|---|-----|
|                   | indices           |   | T           | P       | a [Å]              | b [Å] | γ [deg] | $\Delta E_1$ [eV] | $\Delta E_2$ [eV] | T           | H     |       |   |   |     |
| TcCd <sub>2</sub> | PXX               | — | —           | $P2(3)$ | —                  | —     | —       | 10.08             | 12.42             | 49.0        | 1.789 | 1.844 | — | — | 0.0 |

Table 58: List of XVI-XIII

| species           | Initial structure indices | space group       |                   | lattice parameters |       |       |                |       |       | relative energy |                | spin moment       |                   |     |     |     |     |
|-------------------|---------------------------|-------------------|-------------------|--------------------|-------|-------|----------------|-------|-------|-----------------|----------------|-------------------|-------------------|-----|-----|-----|-----|
|                   |                           | T                 | H                 | a [Å]              | b [Å] | c [Å] | $\gamma$ [deg] | a [Å] | b [Å] | c [Å]           | $\gamma$ [deg] | $\Delta E_1$ [eV] | $\Delta E_2$ [eV] | T   | H   | P   |     |
| OA1 <sub>2</sub>  | HXX                       | —                 | $Fmm2_1(31)$      | —                  | —     | —     | —              | 5.09  | 5.53  | 57.2            | —              | 2.374             | 2.973             | —   | —   | —   | —   |
| Ol <sub>2</sub>   | THX                       | $P\bar{3}m1(164)$ | $P\bar{6}m2(187)$ | 6.64               | 6.63  | 60.2  | 60.2           | 6.60  | 6.58  | 60.2            | —              | 0.488             | 2.401             | 0.0 | 0.0 | —   | —   |
| OT <sub>2</sub>   | THX                       | $P3m1(164)$       | $P\bar{6}m2(187)$ | 7.40               | 7.39  | 58.7  | 58.7           | 7.17  | 7.16  | 59.4            | —              | 0.417             | 1.002             | 0.0 | 0.0 | —   | —   |
| SA1 <sub>2</sub>  | PXX                       | —                 | —                 | —                  | —     | —     | —              | —     | —     | —               | —              | —                 | —                 | —   | —   | —   | —   |
| ST <sub>2</sub>   | TPH                       | $P\bar{3}m1(164)$ | $P\bar{6}m2(187)$ | 8.54               | 8.54  | 59.0  | 59.0           | 8.33  | 8.33  | 59.4            | 8.09           | 2.727             | 2.786             | —   | —   | —   | —   |
| SeIn <sub>2</sub> | HTX                       | $P\bar{3}m1(164)$ | $P\bar{6}m2(187)$ | 8.13               | 8.11  | 60.6  | 60.6           | 7.98  | 7.97  | 60.6            | 8.62           | 0.008             | 0.169             | 0.0 | 0.0 | 0.0 | 0.0 |
| SeTl <sub>2</sub> | PTH                       | $P\bar{3}m1(164)$ | $P\bar{6}m2(187)$ | 9.00               | 9.00  | 58.8  | 58.8           | 8.70  | 8.70  | 58.1            | —              | 0.285             | 2.427             | 0.0 | 0.0 | —   | —   |
| TeB <sub>2</sub>  | PXX                       | —                 | —                 | —                  | —     | —     | —              | —     | —     | —               | 8.99           | 0.005             | 0.055             | 0.0 | 0.0 | —   | —   |
| TeTl <sub>2</sub> | HPT                       | $P\bar{3}m1(164)$ | $P\bar{6}m2(187)$ | 9.79               | 9.80  | 58.4  | 58.4           | 9.28  | 9.32  | 58.4            | 6.22           | 17.621            | 18.239            | —   | —   | —   | —   |
|                   |                           |                   |                   |                    |       |       |                |       |       |                 | 9.76           | 0.032             | 0.034             | 0.0 | 0.0 | 0.0 | 0.0 |

Table 59: List of XVI-XIV

| species           | Initial structure indices    | space group |   |                              | lattice parameters |       |       |                |       |       | relative energy |                | spin moment       |                   |     |     |     |     |
|-------------------|------------------------------|-------------|---|------------------------------|--------------------|-------|-------|----------------|-------|-------|-----------------|----------------|-------------------|-------------------|-----|-----|-----|-----|
|                   |                              | T           | H | P                            | a [Å]              | b [Å] | c [Å] | $\gamma$ [deg] | a [Å] | b [Å] | c [Å]           | $\gamma$ [deg] | $\Delta E_1$ [eV] | $\Delta E_2$ [eV] | T   | H   | P   |     |
| OSi <sub>2</sub>  | PXX                          | —           | — | <i>P1</i> (1)                | —                  | —     | —     | —              | 6.67  | 7.90  | —               | 67.9           | 1.102             | 2.497             | —   | —   | —   | 0.0 |
| OPb <sub>2</sub>  | TXX                          | —           | — | —                            | —                  | —     | —     | —              | —     | —     | —               | —              | 1.078             | 4.459             | —   | —   | —   | —   |
| SGe <sub>2</sub>  | HTP                          | —           | — | <i>P1</i> (1)                | 7.28               | 6.85  | 57.6  | —              | 6.72  | 6.90  | 60.6            | 78.8           | 0.002             | 0.771             | 0.0 | 0.0 | 0.0 | 0.0 |
| SSn <sub>2</sub>  | TTPH                         | —           | — | <i>P6m2</i> (187)            | 6.73               | 6.89  | 60.9  | —              | 7.02  | 7.02  | 59.1            | 85.7           | 0.037             | 0.309             | 0.0 | 0.0 | 0.0 | 0.0 |
| SPb <sub>2</sub>  | <i>P3m1</i> (164)            | —           | — | <i>Pmmm</i> (59)             | 7.14               | 7.16  | 59.7  | —              | 7.54  | 6.88  | 56.4            | 10.21          | 0.289             | 0.527             | 0.0 | 0.0 | 0.0 | 0.0 |
| SeSn <sub>2</sub> | <i>P3m1</i> (164)            | —           | — | <i>P2<sub>1</sub>/m</i> (11) | 7.45               | 7.44  | 59.7  | —              | —     | —     | —               | —              | 0.327             | 0.868             | 0.0 | —   | —   | 0.0 |
| SePb <sub>2</sub> | P <sub>21</sub> /m(11)       | —           | — | <i>P1</i> (1)                | 7.46               | 7.46  | 59.0  | —              | —     | —     | —               | —              | 0.379             | 0.517             | 0.0 | 0.0 | 0.0 | 0.0 |
| TePb <sub>2</sub> | <i>P2<sub>1</sub>/m</i> (11) | —           | — | <i>P2<sub>1</sub>/m</i> (11) | 7.94               | 7.94  | 57.5  | —              | 7.02  | 7.77  | 55.9            | 43.2           | 0.103             | 1.349             | —   | —   | —   | 0.0 |
|                   | PHX                          | —           | — | <i>Pc</i> (7)                | —                  | —     | —     | —              | 9.27  | 13.39 | 42.8            | 48.5           | —                 | —                 | —   | —   | —   | 0.0 |
|                   |                              | —           | — | <i>P1</i> (2)                | —                  | —     | —     | —              | 10.57 | 10.84 | —               | —              | —                 | —                 | —   | —   | —   | 0.0 |

Table 60: List of XVI-XV

| species           | Initial structure indices | space group   |   |              | lattice parameters |       |       |                |       |       | relative energy |                | spin moment       |                   |     |   |   |     |
|-------------------|---------------------------|---------------|---|--------------|--------------------|-------|-------|----------------|-------|-------|-----------------|----------------|-------------------|-------------------|-----|---|---|-----|
|                   |                           | T             | H | P            | a [Å]              | b [Å] | c [Å] | $\gamma$ [deg] | a [Å] | b [Å] | c [Å]           | $\gamma$ [deg] | $\Delta E_1$ [eV] | $\Delta E_2$ [eV] | T   | H | P |     |
| Sb <sub>2</sub>   | PXX                       | -             | - | $P2_1/m(11)$ | -                  | -     | -     | -              | 9.73  | 10.66 | -               | 56.2           | 1.536             | 1.745             | -   | - | - | 0.0 |
| SeSb <sub>2</sub> | PTX                       | $P\bar{1}(2)$ | - | $P1(1)$      | 7.56               | 7.90  | 59.6  | -              | 11.69 | 10.10 | -               | 42.7           | 0.546             | 2.176             | 0.0 | - | - | 0.0 |
| SeBi <sub>2</sub> | PXX                       | -             | - | $P1(1)$      | -                  | -     | -     | -              | 11.73 | 8.77  | -               | 58.6           | 1.572             | 1.751             | -   | - | - | 0.0 |

Table 61: List of XVI-XVI

| species           | Initial structure indices |                            | space group             |               | lattice parameters |       |       |                |       |       | relative energy |                | spin moment       |                   |     |     |     |
|-------------------|---------------------------|----------------------------|-------------------------|---------------|--------------------|-------|-------|----------------|-------|-------|-----------------|----------------|-------------------|-------------------|-----|-----|-----|
|                   | T                         | H                          | H                       | P             | a [Å]              | b [Å] | c [Å] | $\gamma$ [deg] | a [Å] | b [Å] | c [Å]           | $\gamma$ [deg] | $\Delta E_1$ [eV] | $\Delta E_2$ [eV] | T   | H   | P   |
| SS <sub>2</sub>   | HXX                       | -                          | <i>Pc</i> ( $\bar{7}$ ) | -             | -                  | -     | -     | -              | 8.20  | 11.18 | 43.5            | -              | 2.451             | 2.703             | -   | 0.0 | -   |
| SSe <sub>2</sub>  | HPX                       | -                          | <i>Pc</i> ( $\bar{7}$ ) | <i>P1</i> (1) | -                  | -     | -     | -              | 8.81  | 11.67 | 41.4            | -              | 0.744             | 2.519             | -   | 0.0 | 0.0 |
| SeS <sub>2</sub>  | PTX                       | <i>P</i> $\bar{3}m1$ (164) | -                       | <i>P1</i> (1) | 7.14               | 7.14  | 60.3  | -              | -     | -     | -               | -              | 0.729             | 4.000             | 0.0 | -   | -   |
| SeSe <sub>2</sub> | TXX                       | <i>P</i> $\bar{3}m1$ (164) | -                       | -             | 7.47               | 7.47  | 60.3  | -              | -     | -     | -               | -              | 0.859             | 2.830             | 0.0 | -   | -   |
| TeS <sub>2</sub>  | TXX                       | <i>P</i> $\bar{3}m1$ (164) | -                       | -             | 7.71               | 7.71  | 59.8  | -              | -     | -     | -               | -              | 2.292             | 2.634             | 0.0 | -   | -   |
| TeSe <sub>2</sub> | TXX                       | <i>P</i> $\bar{3}m1$ (164) | -                       | -             | 7.97               | 7.97  | 59.8  | -              | -     | -     | -               | -              | 0.931             | 2.325             | 0.0 | -   | -   |
| TeTe <sub>2</sub> | TXX                       | <i>P</i> $\bar{3}m1$ (164) | -                       | -             | 8.57               | 8.57  | 59.3  | -              | -     | -     | -               | -              | 1.102             | 1.829             | 0.0 | -   | -   |

Table 62: List of XVI-XVII

| species           | Initial structure indices |          | space group |          |       | lattice parameters |       |       |                |       |       | relative energy |                | spin moment       |                   |      |       |       |     |     |
|-------------------|---------------------------|----------|-------------|----------|-------|--------------------|-------|-------|----------------|-------|-------|-----------------|----------------|-------------------|-------------------|------|-------|-------|-----|-----|
|                   | T                         | H        | H           | P        | P     | a [Å]              | b [Å] | c [Å] | $\gamma$ [deg] | a [Å] | b [Å] | c [Å]           | $\gamma$ [deg] | $\Delta E_1$ [eV] | $\Delta E_2$ [eV] | T    | H     | P     |     |     |
| SCl <sub>2</sub>  | P1(2)                     | P1(1)    | P1(1)       | P2/c(13) | P     | 7.47               | 8.27  | 78.4  | 78.4           | 7.16  | 9.40  | 9.96            | 96.0           | 9.96              | 10.57             | 96.2 | 0.379 | 0.641 | 0.0 | 0.0 |
| SBr <sub>2</sub>  | P2 <sub>1</sub> /c(14)    | Pm(6)    | Pm(6)       | P1(1)    | P1(1) | 8.48               | 8.48  | 73.3  | 73.3           | 7.93  | 8.36  | 11.15           | 65.1           | 11.13             | 11.13             | 72.1 | 0.222 | 0.350 | 0.0 | 0.0 |
| SI <sub>2</sub>   | P1(1)                     | Amm2(38) | Amm2(38)    | P1(2)    | P1(2) | 7.91               | 9.57  | 75.7  | 75.7           | 7.96  | 9.56  | 9.98            | 64.8           | 9.98              | 12.93             | 55.3 | 0.019 | 0.038 | 0.0 | 0.0 |
| SeBr <sub>2</sub> | -                         | P1(1)    | P1(1)       | -        | -     | -                  | -     | -     | -              | 8.07  | 7.30  | -               | 76.7           | -                 | -                 | -    | 0.853 | 0.872 | -   | 0.0 |
| Sel <sub>2</sub>  | P1(2)                     | Cmmm(65) | Cmmm(65)    | -        | -     | 7.92               | 10.24 | 76.2  | 76.2           | 9.54  | 7.92  | -               | 65.7           | -                 | -                 | -    | 0.078 | 0.890 | 0.0 | 0.0 |

Table 63: List of XVI-TM

| species | Initial structure indices | space group       |                   |               | lattice parameters |       |       |                |       |       | relative energy |                | spin moment       |                   |       |       |      |     |
|---------|---------------------------|-------------------|-------------------|---------------|--------------------|-------|-------|----------------|-------|-------|-----------------|----------------|-------------------|-------------------|-------|-------|------|-----|
|         |                           | T                 | H                 | P             | a [Å]              | b [Å] | c [Å] | $\gamma$ [deg] | a [Å] | b [Å] | c [Å]           | $\gamma$ [deg] | $\Delta E_1$ [eV] | $\Delta E_2$ [eV] | T     | H     | P    |     |
| OSc2    | TXX                       | $P\bar{3}m1(164)$ | —                 | —             | 6.38               | 6.39  | 60.0  | —              | —     | —     | —               | 0.915          | 3.979             | 4.8               | —     | —     | —    |     |
| OT12    | HTX                       | $P\bar{6}m2(187)$ | $P\bar{6}m2(187)$ | —             | 5.96               | 5.98  | 59.9  | 59.9           | 5.60  | 5.60  | 59.9            | —              | 0.164             | 1.350             | 0.0   | 0.0   | —    |     |
| OV2     | HTP                       | $P\bar{3}m1(164)$ | $P\bar{6}m2(187)$ | $P2/c(13)$    | 5.32               | 5.30  | 59.9  | 59.1           | 5.32  | 5.31  | 59.1            | 10.12          | 0.555             | 0.671             | 0.0   | 0.0   | 0.0  |     |
| OCr2    | HTP                       | $P\bar{3}m1(164)$ | $P\bar{6}m2(187)$ | $P2/c(13)$    | 5.74               | 5.73  | 59.9  | 59.8           | 5.08  | 5.08  | 59.8            | 10.96          | 0.403             | 0.650             | 29.1  | 0.0   | 31.9 |     |
| OFe2    | PHT                       | $P\bar{3}m1(164)$ | $P\bar{6}m2(187)$ | $Cmmm(65)$    | 5.37               | 5.37  | 59.8  | 59.8           | 5.33  | 5.32  | 59.8            | 10.08          | 0.083             | 0.553             | 26.4  | 25.4  | 24.2 |     |
| OY2     | PXX                       | —                 | —                 | $Pccm(49)$    | —                  | —     | —     | —              | —     | —     | —               | 11.90          | 0.988             | 0.991             | —     | —     | 0.0  |     |
| OZr2    | THX                       | $P2_1/m(11)$      | $P\bar{6}m2(187)$ | —             | 6.46               | 6.45  | 57.9  | 60.0           | 6.13  | 6.13  | 60.0            | —              | 0.613             | 1.683             | 0.0   | 0.0   | —    |     |
| ONb2    | HTX                       | $P\bar{3}m1(164)$ | $P\bar{6}m2(187)$ | —             | 5.84               | 5.85  | 57.8  | 58.3           | 5.83  | 5.83  | 58.3            | —              | 0.242             | 1.484             | 0.0   | 0.0   | —    |     |
| OMo2    | TXX                       | $P2_1/m(11)$      | —                 | —             | 6.79               | 6.55  | 50.1  | —              | —     | —     | —               | —              | 1.871             | 7.775             | 0.0   | —     | —    |     |
| ORu2    | HPX                       | —                 | $P1(1)$           | $Pc(7)$       | —                  | —     | —     | 56.6           | 5.02  | 5.38  | 56.6            | 9.62           | 0.143             | 0.846             | —     | 0.0   | 0.0  |     |
| OHf2    | PXX                       | —                 | —                 | $P1(1)$       | —                  | —     | —     | —              | —     | —     | —               | 5.03           | 2.913             | 3.990             | —     | 0.0   | 0.0  |     |
| OTa2    | PXX                       | —                 | —                 | $P1(1)$       | —                  | —     | —     | —              | —     | —     | —               | 7.81           | 7.79              | 59.9              | —     | 0.0   | 0.0  |     |
| OW2     | PHX                       | —                 | $Pmn2_1(31)$      | $P1(1)$       | —                  | —     | —     | —              | —     | —     | —               | 8.22           | 5.88              | 2.842             | —     | 0.0   | 0.0  |     |
| OPt2    | PXX                       | —                 | —                 | $P2_1/m(11)$  | —                  | —     | —     | —              | 5.19  | 5.19  | 62.2            | 7.29           | 7.30              | —                 | —     | 0.0   | 0.0  |     |
| OAl2    | THP                       | $P2_1/m(11)$      | $Pmn2_1(31)$      | $P2/c(13)$    | 6.46               | 6.46  | 54.4  | 54.6           | 6.45  | 6.46  | 54.6            | 6.26           | 10.81             | 0.733             | 0.0   | 0.0   | 0.0  |     |
| SSc2    | TPH                       | $P\bar{3}m1(164)$ | $P\bar{6}m2(187)$ | $P3m1(156)$   | 7.04               | 7.03  | 60.0  | 60.0           | 6.79  | 6.79  | 60.0            | 6.95           | 6.98              | 0.224             | 0.717 | 0.0   | 0.0  |     |
| STi2    | PTX                       | $P2_1/m(11)$      | —                 | $P2_1/m(11)$  | 6.56               | 7.28  | 63.1  | —              | —     | —     | —               | 6.57           | 7.29              | 0.014             | 3.411 | 0.0   | 0.0  |     |
| SV2     | PTX                       | $P2_1/m(11)$      | —                 | $P2_1/m(11)$  | 6.89               | 6.89  | 53.0  | —              | —     | —     | —               | 6.89           | 6.89              | 53.1              | 0.008 | 5.997 | 0.0  |     |
| SY2     | PTX                       | $P\bar{3}m1(164)$ | —                 | $P\bar{1}(2)$ | 7.49               | 7.49  | 59.9  | —              | —     | —     | —               | 8.89           | 7.20              | 1.130             | 0.0   | 0.0   | 0.0  |     |
| SZr2    | PXX                       | —                 | —                 | $P2_1/m(11)$  | —                  | —     | —     | —              | —     | —     | —               | 7.97           | 7.04              | —                 | —     | 0.0   | 0.0  |     |
| SNb2    | TXX                       | $P\bar{1}(2)$     | —                 | —             | 7.56               | 7.30  | 50.3  | —              | —     | —     | —               | —              | 1.868             | 3.667             | 0.0   | —     | —    |     |
| STe2    | PXX                       | —                 | —                 | $P\bar{1}(2)$ | —                  | —     | —     | —              | —     | —     | —               | 4.62           | 6.99              | —                 | —     | 0.0   | 0.0  |     |
| SAl2    | TXX                       | $P4_2(90)$        | —                 | —             | 8.04               | 11.46 | 44.3  | —              | —     | —     | —               | —              | 1.498             | 2.257             | 0.0   | —     | —    |     |
| SeSc2   | TPH                       | $P2_1/m(11)$      | $P\bar{6}m2(187)$ | $P2_1/m(11)$  | 8.11               | 8.12  | 52.2  | 52.2           | 6.98  | 6.97  | 60.0            | 8.12           | 8.12              | 0.003             | 0.776 | 0.0   | 0.0  |     |
| SeV2    | TXX                       | $P\bar{1}(2)$     | —                 | —             | 6.59               | 6.77  | 60.4  | 60.4           | —     | —     | —               | —              | 9.914             | 10.090            | 0.0   | —     | —    |     |
| SeY2    | HTP                       | $P\bar{3}m1(164)$ | $P\bar{6}m2(187)$ | $P2_1/m(11)$  | 7.66               | 7.65  | 60.0  | 59.9           | 7.39  | 7.38  | 59.9            | 7.53           | 8.63              | 0.058             | 0.150 | 0.0   | 0.0  |     |
| SeZr2   | PTX                       | $P2_1/m(11)$      | —                 | $P2_1/m(11)$  | 8.16               | 8.15  | 52.1  | 52.1           | 8.16  | 8.15  | 52.1            | 7.17           | 8.16              | 0.023             | 3.252 | 0.0   | 0.0  |     |
| TeSc2   | TPX                       | $P\bar{1}(2)$     | —                 | —             | 7.64               | 8.55  | 63.8  | 63.8           | —     | —     | —               | 8.62           | 7.54              | 0.150             | 2.466 | 0.5   | —    | 0.0 |



Table 64: List of XVII-I

| species           | Initial structure indices | space group                  |                   |                              | lattice parameters |       |       |                |       |       | relative energy |                | spin moment       |                   |     |     |     |
|-------------------|---------------------------|------------------------------|-------------------|------------------------------|--------------------|-------|-------|----------------|-------|-------|-----------------|----------------|-------------------|-------------------|-----|-----|-----|
|                   |                           | T                            | H                 | P                            | a [Å]              | b [Å] | c [Å] | $\gamma$ [deg] | a [Å] | b [Å] | c [Å]           | $\gamma$ [deg] | $\Delta E_1$ [eV] | $\Delta E_2$ [eV] | T   | H   | P   |
| FLi <sub>2</sub>  | PHX                       | -                            | <i>Pmmn</i> (59)  | <i>Cmmm</i> (65)             | 4.92               | 4.92  | 73.3  | 11.48          | 11.46 | 27.6  | 0.134           | 1.185          | -                 | 0.0               | 0.0 | 0.0 |     |
| FNs <sub>2</sub>  | P $\bar{3}m$ 1(164)       | <i>Pmmn</i> (187)            | <i>P6m2</i> (187) | <i>Cmmm</i> (65)             | 7.04               | 7.03  | 59.0  | 13.89          | 13.93 | 26.9  | 0.347           | 0.787          | 0.0               | 0.0               | 0.0 | 0.0 |     |
| FK <sub>2</sub>   | P $\bar{3}m$ 1(164)       | <i>P6m2</i> (187)            | <i>P6m2</i> (187) | <i>Cmmm</i> (65)             | 8.42               | 8.42  | 56.0  | 16.17          | 16.20 | 27.0  | 0.070           | 0.574          | 0.0               | 0.0               | 0.0 | 0.0 |     |
| FRb <sub>2</sub>  | P $\bar{3}m$ 1(164)       | <i>C2/m</i> (12)             | <i>C2/m</i> (12)  | <i>Cmmm</i> (65)             | 8.94               | 8.93  | 55.9  | 10.25          | 10.22 | 46.2  | 17.12           | 17.14          | 0.007             | 0.138             | 0.0 | 0.0 | 0.0 |
| ClK <sub>2</sub>  | P $\bar{3}m$ 1(164)       | <i>P6m2</i> (187)            | <i>P6m2</i> (187) | <i>P2<sub>1</sub>/m</i> (11) | 9.24               | 9.26  | 57.9  | 9.08           | 9.10  | 57.3  | 10.37           | 10.65          | 0.130             | 0.236             | 0.0 | 0.0 | 0.0 |
| ClRb <sub>2</sub> | P $\bar{3}m$ 1(164)       | <i>P6m2</i> (187)            | <i>P6m2</i> (187) | <i>P1</i> (1)                | 9.82               | 9.83  | 58.0  | 9.69           | 9.71  | 56.6  | 11.98           | 11.99          | 0.278             | 0.393             | 0.0 | 0.0 | 0.0 |
| ClCs <sub>2</sub> | P $\bar{3}m$ 1(164)       | <i>Amm2</i> (38)             | <i>Amm2</i> (38)  | <i>P1</i> (1)                | 10.58              | 10.58 | 56.8  | 10.64          | 10.65 | 54.1  | 11.64           | 10.89          | 0.183             | 0.436             | 0.0 | 0.0 | 0.0 |
| BrLi <sub>2</sub> | THP                       | <i>C2/m</i> (12)             | <i>Pc</i> (7)     | <i>P2<sub>1</sub>/m</i> (11) | 7.43               | 7.77  | 57.0  | 6.71           | 6.66  | 72.0  | 8.01            | 7.42           | 0.103             | 0.215             | 0.0 | 0.0 | 0.0 |
| BrK <sub>2</sub>  | THP                       | <i>P3m</i> 1(164)            | <i>P6m2</i> (187) | <i>P2<sub>1</sub>/m</i> (11) | 9.59               | 9.57  | 58.4  | 9.58           | 9.55  | 56.4  | 11.19           | 11.15          | 0.245             | 0.281             | 0.0 | 0.0 | 0.0 |
| BrRb <sub>2</sub> | THP                       | <i>P3m</i> 1(164)            | <i>Amm2</i> (38)  | <i>P2<sub>1</sub>/m</i> (11) | 10.19              | 10.17 | 58.1  | 10.14          | 10.12 | 56.1  | 11.31           | 11.73          | 0.241             | 0.304             | 0.0 | 0.0 | 0.0 |
| BrCs <sub>2</sub> | THP                       | <i>P3m</i> 1(164)            | <i>P6m2</i> (187) | <i>P4m2</i> (115)            | 10.65              | 10.61 | 59.4  | 10.61          | 10.59 | 57.1  | 13.20           | 13.24          | 0.309             | 0.629             | 0.0 | 0.0 | 0.0 |
| IK <sub>2</sub>   | TPH                       | <i>P2<sub>1</sub>/m</i> (11) | <i>P6m2</i> (187) | <i>P1</i> (2)                | 9.84               | 9.86  | 59.0  | 10.00          | 9.98  | 56.2  | 11.61           | 12.07          | 0.041             | 0.189             | 0.0 | 0.0 | 0.0 |
| IRb <sub>2</sub>  | HPX                       | -                            | <i>Amm2</i> (38)  | <i>P1</i> (1)                | -                  | -     | -     | 10.57          | 10.55 | 55.9  | 13.18           | 12.60          | 0.072             | 0.937             | -   | 0.0 | 0.0 |
| ICs <sub>2</sub>  | THP                       | <i>P3m</i> 1(164)            | <i>Amm2</i> (38)  | <i>P1</i> (1)                | 10.99              | 10.96 | 58.9  | 11.22          | 11.18 | 55.7  | 12.27           | 12.09          | 0.245             | 0.271             | 0.0 | 0.0 | 0.0 |

Table 65: List of XVII-II

| species           | Initial structure indices |                   | space group       |            |      | lattice parameters |       |       |                |       |       | relative energy |                | spin moment       |                   |     |     |     |
|-------------------|---------------------------|-------------------|-------------------|------------|------|--------------------|-------|-------|----------------|-------|-------|-----------------|----------------|-------------------|-------------------|-----|-----|-----|
|                   | T                         | H                 | H                 | P          | T    | a [Å]              | b [Å] | c [Å] | $\gamma$ [deg] | a [Å] | b [Å] | c [Å]           | $\gamma$ [deg] | $\Delta E_1$ [eV] | $\Delta E_2$ [eV] | T   | H   | P   |
| FSr <sub>2</sub>  | HTX                       | $P1(1)$           | $P1(1)$           | -          | 8.16 | 9.88               | 54.2  | 8.63  | 8.62           | 60.6  | -     | -               | -              | 0.101             | 1.923             | 0.0 | 0.0 | -   |
| ClCa <sub>2</sub> | THX                       | $P\bar{3}m1(164)$ | $P\bar{6}m2(187)$ | -          | 7.63 | 7.62               | 59.7  | 7.59  | 7.59           | 59.7  | -     | -               | -              | 0.303             | 1.497             | 0.0 | 0.0 | -   |
| ClSr <sub>2</sub> | THX                       | $P\bar{3}m1(164)$ | $P\bar{6}m2(187)$ | -          | 8.25 | 8.24               | 59.6  | 8.33  | 8.33           | 57.7  | -     | -               | -              | 0.343             | 2.532             | 0.0 | 0.0 | -   |
| ClBa <sub>2</sub> | TPH                       | $P\bar{3}m1(164)$ | $P\bar{6}m2(187)$ | $Pmma(53)$ | 8.71 | 8.71               | 59.9  | 8.57  | 8.57           | 59.8  | 12.62 | 7.36            | 90.0           | 0.026             | 0.085             | 0.0 | 0.0 | 0.9 |
| BrCa <sub>2</sub> | THX                       | $P\bar{3}m1(164)$ | $P\bar{6}m2(187)$ | -          | 7.79 | 7.79               | 59.7  | 7.77  | 7.77           | 60.0  | -     | -               | -              | 0.200             | 2.747             | 0.0 | 0.0 | -   |
| BrSr <sub>2</sub> | THX                       | $P\bar{3}m1(164)$ | $P\bar{6}m2(187)$ | -          | 8.38 | 8.38               | 59.6  | 8.30  | 8.30           | 59.7  | -     | -               | -              | 0.198             | 1.454             | 0.0 | 0.0 | -   |
| BrBa <sub>2</sub> | HTX                       | $P\bar{3}m1(164)$ | $P\bar{6}m2(187)$ | -          | 8.85 | 8.85               | 59.8  | 8.72  | 8.72           | 59.7  | -     | -               | -              | 0.055             | 3.475             | 0.0 | 0.0 | -   |
| ISr <sub>2</sub>  | THX                       | $P\bar{3}m1(164)$ | $P\bar{6}m2(187)$ | -          | 8.54 | 8.55               | 59.8  | 8.57  | 8.57           | 59.0  | -     | -               | -              | 0.115             | 1.645             | 0.0 | 0.0 | -   |

Table 66: List of XVII-XII

| species          | Initial structure indices |             | space group |   | lattice parameters |       |       | relative energy |       | spin moment |         |                   |                   |                   |      |   |
|------------------|---------------------------|-------------|-------------|---|--------------------|-------|-------|-----------------|-------|-------------|---------|-------------------|-------------------|-------------------|------|---|
|                  | T                         | H           | P           | H | T                  | a [Å] | b [Å] | γ [deg]         | a [Å] | b [Å]       | γ [deg] | $\Delta E_1$ [eV] | $\Delta E_2$ [eV] | $\frac{\mu_B}{T}$ | cell |   |
| FCd <sub>2</sub> | THX                       | $P3m1(164)$ | $P6m2(187)$ | — | 6.19               | 6.19  | 58.3  | 6.26            | 6.25  | 56.7        | —       | 0.085             | 1.061             | 0.0               | H    | P |
|                  |                           |             |             |   |                    |       |       |                 |       |             |         |                   |                   | 0.0               | H    | P |
|                  |                           |             |             |   |                    |       |       |                 |       |             |         |                   |                   | 0.0               | H    | P |

Table 67: List of XVII-XIII

| species           | Initial structure indices |                   | space group       |               |   | lattice parameters |       |       |                |       |       | relative energy |                | spin moment       |                   |     |     |     |
|-------------------|---------------------------|-------------------|-------------------|---------------|---|--------------------|-------|-------|----------------|-------|-------|-----------------|----------------|-------------------|-------------------|-----|-----|-----|
|                   | T                         | H                 | T                 | H             | P | a [Å]              | b [Å] | c [Å] | $\gamma$ [deg] | a [Å] | b [Å] | c [Å]           | $\gamma$ [deg] | $\Delta E_1$ [eV] | $\Delta E_2$ [eV] | T   | H   | P   |
| FlIn <sub>2</sub> | THX                       | <i>P</i> 3m1(164) | <i>P</i> 6m2(187) |               |   | 6.56               | 6.56  | 60.2  | 60.1           |       |       |                 |                | 0.072             | 1.818             | 0.0 | 0.0 |     |
| FTl <sub>2</sub>  | THX                       | <i>P</i> 3m1(164) | <i>P</i> 6m2(187) |               |   | 7.19               | 7.07  | 58.3  | 59.0           |       |       |                 |                | 0.183             | 2.788             | 0.0 | 0.0 |     |
| ClIn <sub>2</sub> | THP                       | <i>P</i> 3m1(164) | <i>P</i> 6m2(187) | <i>P</i> 1(1) |   | 7.02               | 6.97  | 60.6  | 60.4           | 10.11 | 7.62  |                 | 85.3           | 0.043             | 0.467             | 0.0 | 0.0 | 0.0 |
| ClTl <sub>2</sub> | THX                       | <i>P</i> 3m1(164) | <i>A</i> mm2(38)  |               |   | 7.71               | 7.69  | 57.7  | 55.8           |       |       |                 |                | 0.235             | 2.120             | 0.0 | 0.0 |     |
| BrAl <sub>2</sub> | PXX                       |                   |                   | <i>P</i> 2(3) |   |                    |       |       |                | 6.99  | 7.56  |                 | 83.1           | 5.015             | 5.034             |     |     |     |
| BrTl <sub>2</sub> | PTH                       | <i>P</i> 3m1(164) | <i>A</i> mm2(38)  | <i>P</i> 1(2) |   | 7.88               | 8.04  | 58.6  | 54.7           | 9.87  | 8.39  |                 | 83.2           | 0.056             | 0.449             | 0.0 | 0.0 | 0.0 |

Table 68: List of XVII-XIV

| species           | Initial structure indices |                              | space group      |               | lattice parameters |       |       |                |       |       | relative energy |                | spin moment       |                   |       |       |     |     |
|-------------------|---------------------------|------------------------------|------------------|---------------|--------------------|-------|-------|----------------|-------|-------|-----------------|----------------|-------------------|-------------------|-------|-------|-----|-----|
|                   | T                         | H                            | H                | P             | a [Å]              | b [Å] | c [Å] | $\gamma$ [deg] | a [Å] | b [Å] | c [Å]           | $\gamma$ [deg] | $\Delta E_1$ [eV] | $\Delta E_2$ [eV] | T     | H     | P   |     |
| ClSn <sub>2</sub> | -                         | -                            | <i>Amm2</i> (38) | <i>P1</i> (1) | -                  | -     | -     | -              | 6.81  | 6.81  | 59.8            | 59.8           | 8.91              | 9.05              | 0.211 | 1.219 | -   | 0.0 |
| ClPb <sub>2</sub> | -                         | -                            | -                | <i>P1</i> (1) | -                  | -     | -     | -              | -     | -     | -               | -              | 6.71              | 13.42             | 1.535 | 1.646 | -   | 0.0 |
| BrGe <sub>2</sub> | -                         | -                            | -                | <i>P1</i> (1) | -                  | -     | -     | -              | -     | -     | -               | -              | 7.85              | 7.74              | 1.999 | 2.060 | -   | 0.0 |
| BrSn <sub>2</sub> | -                         | <i>P2<sub>1</sub>/m</i> (11) | -                | <i>Pm</i> (6) | 6.19               | 6.18  | 71.5  | -              | -     | -     | -               | -              | 9.74              | 7.25              | 0.121 | 1.408 | 0.0 | -   |
| BrPb <sub>2</sub> | -                         | -                            | -                | <i>P1</i> (1) | -                  | -     | -     | -              | -     | -     | -               | -              | 10.47             | 9.88              | 1.434 | 2.317 | -   | 0.0 |

Table 69: List of XVII-XV

| species         | Initial structure |    | space group |       | lattice parameters |       |         | relative energy   |                   | spin moment |        |        |    |    |     |
|-----------------|-------------------|----|-------------|-------|--------------------|-------|---------|-------------------|-------------------|-------------|--------|--------|----|----|-----|
|                 | T                 | H  | T           | P     | a [Å]              | b [Å] | γ [deg] | $\Delta E_1$ [eV] | $\Delta E_2$ [eV] | T           | H      | P      |    |    |     |
| IN <sub>2</sub> | PXX               | -- | --          | P1(1) | --                 | --    | --      | 9.18              | 9.72              | 78.0        | 21.899 | 22.768 | -- | -- | 0.0 |

Table 70: List of XVII-XVI

| species           | Initial structure indices |               | space group |   |   | lattice parameters |       |       |                |       |       | relative energy |                | spin moment       |                   |       |       |       |   |     |     |
|-------------------|---------------------------|---------------|-------------|---|---|--------------------|-------|-------|----------------|-------|-------|-----------------|----------------|-------------------|-------------------|-------|-------|-------|---|-----|-----|
|                   | T                         | H             | T           | H | P | a [Å]              | b [Å] | c [Å] | $\gamma$ [deg] | a [Å] | b [Å] | c [Å]           | $\gamma$ [deg] | $\Delta E_1$ [eV] | $\Delta E_2$ [eV] | T     | H     | P     |   |     |     |
| BrSe <sub>2</sub> | -                         | <i>P</i> 1(1) | -           | - | - | -                  | -     | -     | -              | 8.53  | 6.62  | 56.6            | 56.6           | 8.08              | 8.51              | 109.5 | 0.617 | 2.111 | - | 0.0 | 0.0 |
| IS <sub>2</sub>   | -                         | -             | -           | - | - | -                  | -     | -     | -              | 11.21 | 9.66  | -               | -              | 11.21             | 9.66              | 71.1  | 4.600 | 5.349 | - | -   | 1.9 |
| ISe <sub>2</sub>  | -                         | -             | -           | - | - | -                  | -     | -     | -              | 9.35  | 12.58 | -               | -              | 9.35              | 12.58             | 70.5  | 4.298 | 4.658 | - | -   | 0.0 |

Table 71: List of XVII-XVII

| species           | Initial structure indices | space group |       |          | lattice parameters |       |       |                |       |       | relative energy |                | spin moment       |                   |       |       |     |     |     |
|-------------------|---------------------------|-------------|-------|----------|--------------------|-------|-------|----------------|-------|-------|-----------------|----------------|-------------------|-------------------|-------|-------|-----|-----|-----|
|                   |                           | T           | H     | P        | a [Å]              | b [Å] | c [Å] | $\gamma$ [deg] | a [Å] | b [Å] | c [Å]           | $\gamma$ [deg] | $\Delta E_1$ [eV] | $\Delta E_2$ [eV] | T     | H     | P   |     |     |
| Cl <sub>2</sub>   | PHX                       | -           | P1(1) | P2/c(13) | -                  | -     | -     | 10.28          | 6.52  | 94.6  | 94.6            | 10.76          | 10.84             | 98.2              | 0.715 | 2.022 | -   | 0.0 | 0.0 |
| ClBr <sub>2</sub> | PHX                       | -           | P1(1) | P2/c(13) | -                  | -     | -     | 8.78           | 7.23  | 80.9  | 80.9            | 10.62          | 10.63             | 94.8              | 0.159 | 2.528 | -   | 0.0 | 0.0 |
| BrF <sub>2</sub>  | HTP                       | -           | P1(2) | P1(2)    | 8.04               | 5.93  | 90.6  | 8.79           | 5.94  | 62.1  | 62.1            | 7.31           | 8.37              | 74.4              | 0.070 | 0.577 | 0.0 | 0.0 | 0.0 |
| BrCl <sub>2</sub> | PHT                       | P2/m(10)    | P1(2) | P1(1)    | 8.01               | 8.38  | 80.5  | 8.06           | 8.01  | 70.2  | 70.2            | 11.19          | 11.29             | 102.7             | 0.218 | 0.228 | 0.0 | 0.0 | 0.0 |
| BrBr <sub>2</sub> | PXX                       | -           | -     | P1(2)    | -                  | -     | -     | -              | -     | -     | -               | 11.50          | 10.75             | 95.9              | 1.125 | 1.130 | -   | -   | 0.0 |
| BrI <sub>2</sub>  | PXX                       | -           | -     | Pc(7)    | -                  | -     | -     | -              | -     | -     | -               | 13.24          | 11.46             | 66.2              | 1.177 | 3.073 | -   | -   | 0.0 |
| ICl <sub>2</sub>  | THP                       | P1(2)       | P1(1) | P1(2)    | 9.36               | 8.62  | 80.0  | 7.93           | 8.97  | 75.1  | 75.1            | 13.63          | 8.65              | 81.4              | 0.112 | 0.159 | 0.0 | 0.0 | 0.0 |
| IBr <sub>2</sub>  | TPH                       | P1(2)       | P1(1) | P1(1)    | 9.08               | 9.40  | 76.7  | 8.93           | 9.22  | 78.3  | 78.3            | 10.74          | 10.83             | 87.9              | 0.019 | 0.075 | 0.0 | 0.0 | 0.0 |
| II <sub>2</sub>   | PHT                       | P1(2)       | P1(2) | P2/m(10) | 9.69               | 9.61  | 84.7  | 9.73           | 9.58  | 62.4  | 62.4            | 11.74          | 13.03             | 94.1              | 0.444 | 0.501 | 0.0 | 0.0 | 0.0 |



Table 72: List of XVII-TM

| species           | Initial structure indices | space group                 |                  |                                         | lattice parameters |       |       |                |       |       | relative energy |                | spin moment       |                   |     |     |     |
|-------------------|---------------------------|-----------------------------|------------------|-----------------------------------------|--------------------|-------|-------|----------------|-------|-------|-----------------|----------------|-------------------|-------------------|-----|-----|-----|
|                   |                           | T                           | H                | P                                       | a [Å]              | b [Å] | c [Å] | $\gamma$ [deg] | a [Å] | b [Å] | c [Å]           | $\gamma$ [deg] | $\Delta E_1$ [eV] | $\Delta E_2$ [eV] | T   | H   | P   |
| FTa <sub>2</sub>  | PXX                       | —                           | —                | <i>P1(2)</i>                            | —                  | —     | —     | —              | 5.99  | 5.71  | 62.9            | 10.357         | 10.429            | —                 | —   | —   | 0.0 |
| FAu <sub>2</sub>  | P $\overline{1}$ H        | <i>Pmmm(59)</i>             | <i>Pmmm(59)</i>  | <i>P2/m(10)</i>                         | 4.95               | 4.95  | 72.4  | 53.7           | 13.06 | 5.77  | 72.8            | 0.662          | 0.666             | 0.0               | 0.0 | 0.0 | 0.0 |
| ClSc <sub>2</sub> | PXX                       | —                           | —                | <i>P1(1)</i>                            | —                  | —     | —     | —              | 6.41  | 6.73  | 73.6            | 5.835          | 6.699             | —                 | —   | —   | 0.0 |
| ClY <sub>2</sub>  | HPT                       | <i>P3m1(164)</i>            | <i>P6m2(187)</i> | <i>P2<sub>1</sub>2<sub>1</sub>2(18)</i> | 7.08               | 7.08  | 60.1  | 60.1           | 8.72  | 8.72  | 81.4            | 0.622          | 0.748             | 0.0               | 0.0 | 0.0 | 0.0 |
| BrSc <sub>2</sub> | PXX                       | —                           | —                | <i>P1(1)</i>                            | —                  | —     | —     | —              | 6.24  | 6.51  | 79.3            | 6.190          | 7.243             | —                 | —   | —   | 0.0 |
| BrTi <sub>2</sub> | TXX                       | <i>Pmma(51)</i>             | —                | —                                       | 7.80               | 5.55  | 45.2  | —              | —     | —     | —               | 14.720         | 20.222            | 0.0               | —   | —   | —   |
| BrHf <sub>2</sub> | THP                       | <i>P2<sub>1</sub>/m(11)</i> | <i>Pm(6)</i>     | <i>Pm(6)</i>                            | 6.60               | 6.70  | 59.5  | 60.3           | 8.66  | 5.58  | 49.6            | 0.551          | 0.623             | 0.0               | 0.0 | 0.0 | 0.0 |
| BrRe <sub>2</sub> | PXX                       | —                           | —                | <i>Cm(8)</i>                            | —                  | —     | —     | —              | 5.65  | 5.65  | 60.0            | 4.136          | 47.650            | —                 | —   | —   | 0.0 |

Table 73: List of TM-I

| species           | Initial structure indices | space group       |                   | lattice parameters |       |       |                |       |       | relative energy |                | spin moment       |                   |      |     |     |
|-------------------|---------------------------|-------------------|-------------------|--------------------|-------|-------|----------------|-------|-------|-----------------|----------------|-------------------|-------------------|------|-----|-----|
|                   |                           | T                 | H                 | a [Å]              | b [Å] | c [Å] | $\gamma$ [deg] | a [Å] | b [Å] | c [Å]           | $\gamma$ [deg] | $\Delta E_1$ [eV] | $\Delta E_2$ [eV] | T    | H   | P   |
| CrK <sub>2</sub>  | HXX                       | —                 | $P2_1/m(11)$      | —                  | 8.68  | 10.18 | 53.9           | —     | —     | —               | 1.711          | 3.942             | —                 | 20.3 | —   | —   |
| CrCs <sub>2</sub> | THX                       | $P\bar{3}m1(164)$ | $Amm2(38)$        | 11.35              | 11.40 | 58.3  | 48.4           | —     | —     | —               | 0.599          | 2.505             | 22.1              | 21.2 | —   | —   |
| RhLi <sub>2</sub> | PTH                       | $P4/mmm(123)$     | $P4/mmm(123)$     | 5.54               | 7.85  | 45.2  | 45.1           | —     | —     | —               | 0.133          | 0.149             | 0.0               | 0.0  | 0.0 | 0.0 |
| PdK <sub>2</sub>  | HPPT                      | $P\bar{3}m1(164)$ | $Fm\bar{3}m(47)$  | 10.58              | 10.59 | 57.8  | 41.7           | —     | —     | —               | 0.480          | 0.512             | 0.0               | 0.0  | 0.0 | 0.0 |
| PdRb <sub>2</sub> | PTX                       | $P\bar{3}m1(164)$ | —                 | 10.86              | 10.89 | 58.4  | —              | —     | —     | —               | 0.019          | 1.091             | 0.0               | —    | —   | —   |
| PdCs <sub>2</sub> | TXX                       | $P\bar{3}m1(164)$ | —                 | 10.85              | 10.91 | 59.8  | —              | —     | —     | —               | 0.882          | 2.308             | 0.0               | —    | —   | —   |
| AgK <sub>2</sub>  | THX                       | $C2/m(12)$        | $Amm2(38)$        | 10.05              | 10.04 | 56.1  | 50.5           | —     | —     | —               | 0.348          | 2.338             | 0.0               | 0.0  | 0.0 | 0.0 |
| AgCs <sub>2</sub> | TPH                       | $P\bar{3}m1(164)$ | $Amm2(38)$        | 11.02              | 11.02 | 60.0  | 60.0           | —     | —     | —               | 0.267          | 0.523             | 0.0               | 0.0  | 0.0 | 0.0 |
| ReCs <sub>2</sub> | TXX                       | $C2/m(12)$        | —                 | 10.91              | 11.87 | 45.3  | —              | —     | —     | —               | 10.951         | 11.154            | 6.0               | —    | —   | —   |
| OsCs <sub>2</sub> | HXX                       | —                 | $P2/c(13)$        | —                  | 12.42 | 9.66  | 40.3           | —     | —     | —               | 5.639          | 5.702             | —                 | 8.2  | —   | —   |
| PtK <sub>2</sub>  | TPX                       | $P\bar{3}m1(164)$ | —                 | 10.23              | 10.22 | 59.1  | —              | —     | —     | —               | 0.380          | 1.658             | 0.0               | —    | —   | —   |
| PtRb <sub>2</sub> | TPX                       | $P\bar{3}m1(164)$ | —                 | 10.62              | 10.61 | 58.8  | —              | —     | —     | —               | 0.306          | 1.460             | 0.0               | —    | —   | —   |
| PtCs <sub>2</sub> | THX                       | $P\bar{3}m1(164)$ | $P\bar{3}m1(164)$ | 10.67              | 10.67 | 60.0  | 60.0           | —     | —     | —               | 0.038          | 0.939             | 0.0               | 0.0  | 0.0 | 0.0 |
| AuNa <sub>2</sub> | THX                       | $P2_1/m(11)$      | $Cmmm(65)$        | 9.75               | 7.58  | 48.7  | 42.6           | —     | —     | —               | 0.527          | 3.404             | 0.0               | 0.0  | 0.0 | 0.0 |
| AuK <sub>2</sub>  | PTH                       | $P\bar{3}m1(164)$ | $Amm2(38)$        | 9.75               | 9.76  | 59.6  | 50.6           | —     | —     | —               | 0.142          | 0.621             | 0.0               | 0.0  | 0.0 | 0.0 |
| AuRb <sub>2</sub> | THP                       | $P\bar{3}m1(164)$ | $Amm2(38)$        | 10.14              | 10.17 | 60.1  | 60.1           | —     | —     | —               | 0.437          | 0.491             | 0.0               | 0.0  | 0.0 | 0.0 |
| AuCs <sub>2</sub> | THP                       | $P\bar{3}m1(164)$ | $Amm2(38)$        | 10.73              | 10.72 | 59.6  | 55.1           | —     | —     | —               | 0.621          | 0.654             | 0.0               | 0.0  | 0.0 | 0.0 |

Table 74: List of TM-II

| species           | Initial structure indices | space group   |               |               | lattice parameters |       |       |                |       |       | relative energy |                | spin moment       |                   |      |      |
|-------------------|---------------------------|---------------|---------------|---------------|--------------------|-------|-------|----------------|-------|-------|-----------------|----------------|-------------------|-------------------|------|------|
|                   |                           | T             | H             | P             | a [Å]              | b [Å] | c [Å] | $\gamma$ [deg] | a [Å] | b [Å] | c [Å]           | $\gamma$ [deg] | $\Delta E_1$ [eV] | $\Delta E_2$ [eV] | T    | H    |
| ScCa <sub>2</sub> | HfX                       | $P4/mmm(123)$ | $P4/mmm(123)$ | —             | 7.35               | 10.44 | 44.6  | 45.2           | —     | —     | —               | 0.003          | 9.863             | 0.0               | 0.0  | —    |
| TiBe <sub>2</sub> | THP                       | $P4/mmm(123)$ | $P4/mmm(123)$ | $P1(1)$       | 5.26               | 7.31  | 43.8  | 43.9           | 6.65  | 5.28  | —               | 0.027          | 0.467             | 0.0               | 0.0  | 0.0  |
| TiMg <sub>2</sub> | THX                       | $P4/mmm(123)$ | $P4/mmm(123)$ | —             | 6.14               | 8.75  | 44.4  | 44.5           | —     | —     | —               | 0.025          | 10.966            | 0.0               | 0.0  | —    |
| TiCa <sub>2</sub> | HfX                       | $Pnma(51)$    | $P4/mmm(123)$ | —             | 10.20              | 7.09  | 45.9  | 44.9           | 10.33 | 7.30  | —               | 0.530          | 11.273            | 8.6               | 9.6  | —    |
| VB <sub>2</sub>   | THX                       | $P4/mmm(123)$ | $P4/mmm(123)$ | —             | 4.80               | 6.81  | 44.4  | 44.8           | —     | —     | —               | 0.003          | 9.537             | 0.0               | 0.0  | —    |
| VSt <sub>2</sub>  | TXX                       | $C2/m(12)$    | —             | —             | 7.76               | 10.28 | 48.5  | —              | —     | —     | —               | 2.329          | 2.557             | 1.4               | —    | —    |
| CrMg <sub>2</sub> | THX                       | $P4/mmm(123)$ | $P4/mmm(123)$ | —             | 6.26               | 9.01  | 43.8  | 44.1           | 6.25  | 8.95  | —               | 0.060          | 5.738             | 14.8              | 14.8 | —    |
| CrCa <sub>2</sub> | THX                       | $P4/mmm(123)$ | $P4/mmm(123)$ | —             | 7.62               | 8.88  | 54.4  | 44.9           | 7.47  | 10.52 | —               | 0.577          | 1.952             | 16.0              | 17.7 | —    |
| CrSr <sub>2</sub> | PHX                       | $P2_1/m(11)$  | $P4/mmm(123)$ | $P1(2)$       | —                  | —     | —     | 44.9           | —     | —     | —               | 1.423          | 2.977             | —                 | —    | —    |
| CrBa <sub>2</sub> | PXX                       | —             | —             | $P2_1/m(11)$  | —                  | —     | —     | —              | 8.70  | 9.16  | —               | —              | —                 | —                 | —    | —    |
| MnBe <sub>2</sub> | HfX                       | $P4/mmm(123)$ | $Cmmm(65)$    | —             | 5.15               | 7.25  | 45.2  | 45.2           | 4.60  | 7.51  | —               | 0.801          | 7.736             | 7.7               | 0.0  | —    |
| MnCa <sub>2</sub> | TPH                       | $P2_1/m(11)$  | $P4/mmm(123)$ | $P1(2)$       | 7.55               | 8.78  | 54.5  | 44.7           | 7.37  | 10.46 | —               | 0.441          | 0.589             | 14.7              | 17.2 | 14.8 |
| FeBe <sub>2</sub> | HfX                       | $P4/mmm(123)$ | $P4/mmm(123)$ | —             | 7.37               | 5.21  | 45.0  | 45.0           | 7.29  | 5.15  | —               | 0.475          | 9.512             | 0.0               | 5.0  | —    |
| NiBe <sub>2</sub> | THX                       | $P3m1(164)$   | $P4/mmm(123)$ | —             | 7.41               | 6.38  | 29.8  | 44.9           | 5.12  | 7.26  | —               | 0.315          | 6.864             | 0.0               | 0.0  | —    |
| ZrBe <sub>2</sub> | PXX                       | —             | —             | $P4/nmm(129)$ | —                  | —     | —     | —              | 5.71  | 8.08  | —               | 6.083          | 6.270             | —                 | —    | 0.0  |
| ZrMg <sub>2</sub> | TXX                       | $P4/mmm(123)$ | —             | —             | 6.58               | 9.37  | 42.1  | —              | —     | —     | —               | 1.262          | 14.651            | 0.0               | —    | —    |
| ZrCa <sub>2</sub> | THX                       | $P4/mmm(123)$ | $P4/mmm(123)$ | —             | 7.16               | 10.14 | 45.0  | 44.9           | 10.16 | 7.18  | —               | 0.017          | 13.243            | 0.0               | 0.0  | —    |
| NbBe <sub>2</sub> | THX                       | $P4/mmm(123)$ | $P4/mmm(123)$ | —             | 7.84               | 5.43  | 43.8  | 43.7           | 5.43  | 7.85  | —               | 0.001          | 4.217             | 0.0               | 0.0  | —    |
| NbCa <sub>2</sub> | THX                       | $P2_1/m(11)$  | $Pnma(51)$    | —             | 6.86               | 10.30 | 48.0  | 46.5           | 6.92  | 10.11 | —               | 0.468          | 14.491            | 0.0               | 0.0  | —    |
| MoBe <sub>2</sub> | HfX                       | $Cmmm(65)$    | $Pnma(25)$    | —             | 5.16               | 8.03  | 38.9  | 21.2           | 8.21  | 8.21  | —               | 0.355          | 6.371             | 0.0               | 0.0  | —    |
| TcBe <sub>2</sub> | HfX                       | $P1(2)$       | $Pnma(51)$    | —             | 7.50               | 6.57  | 33.5  | 41.4           | 7.99  | 6.00  | —               | 0.715          | 3.892             | 0.0               | 0.0  | —    |
| RuBe <sub>2</sub> | HXX                       | —             | $Pnma(51)$    | —             | —                  | —     | —     | 45.0           | —     | —     | —               | 1.933          | 5.762             | —                 | —    | —    |
| RuCa <sub>2</sub> | TXX                       | $P2_1/m(11)$  | —             | —             | 8.83               | 7.22  | 52.3  | —              | —     | —     | —               | 1.040          | 1.344             | 0.0               | —    | —    |
| RhBe <sub>2</sub> | PXX                       | —             | —             | $P4/nmm(129)$ | —                  | —     | —     | —              | —     | —     | —               | 1.291          | 2.630             | —                 | —    | 0.0  |
| PdCa <sub>2</sub> | PTX                       | $P3m1(164)$   | —             | $P3m1(164)$   | 8.53               | 8.54  | 59.8  | —              | —     | —     | —               | 0.006          | 1.685             | 0.0               | —    | 0.0  |
| PdSr <sub>2</sub> | TXX                       | $P3m1(164)$   | —             | —             | 9.14               | 9.14  | 59.2  | —              | —     | —     | —               | 2.115          | 4.412             | 0.0               | —    | —    |
| AgCa <sub>2</sub> | THX                       | $P3m1(164)$   | $Amm2(38)$    | —             | 8.98               | 8.97  | 59.5  | 60.9           | 7.78  | 7.80  | —               | 0.101          | 1.069             | 0.0               | 0.0  | —    |
| AgSr <sub>2</sub> | TXX                       | $P3m1(164)$   | —             | —             | 9.53               | 9.53  | 59.8  | —              | —     | —     | —               | 0.860          | 4.582             | 0.0               | —    | —    |
| AgBa <sub>2</sub> | TPX                       | $P3m1(164)$   | —             | $P3m1(35)$    | 9.97               | 9.96  | 59.7  | —              | —     | —     | —               | 0.019          | 1.129             | 0.0               | —    | 0.0  |
| HfBe <sub>2</sub> | PHX                       | —             | $P4/mmm(123)$ | —             | —                  | —     | —     | —              | 8.00  | 5.79  | —               | 0.011          | 13.950            | 0.0               | 0.0  | —    |
| HfCa <sub>2</sub> | THX                       | $P4/mmm(123)$ | $P4/mmm(123)$ | —             | 9.97               | 7.05  | 45.0  | 44.8           | 7.08  | 9.99  | —               | 0.199          | 5.207             | 0.0               | 0.0  | —    |
| TaBe <sub>2</sub> | THX                       | $Pnma(25)$    | $P4/mmm(123)$ | —             | 8.54               | 9.17  | 21.4  | 44.5           | 5.47  | 7.80  | —               | 0.512          | 3.976             | 0.0               | 0.0  | —    |
| WBe <sub>2</sub>  | THX                       | $Pm(6)$       | $Cmmm(65)$    | —             | 7.49               | 8.17  | 23.4  | 38.9           | 5.20  | 8.09  | —               | 0.192          | 0.208             | 0.0               | 0.0  | —    |
| WSr <sub>2</sub>  | HfT                       | $P2_1/m(11)$  | $P1(2)$       | $P2_1/m(11)$  | 8.17               | 7.80  | 58.5  | 53.0           | 7.99  | 9.00  | —               | 2.085          | 7.582             | —                 | —    | —    |
| OsBe <sub>2</sub> | HXX                       | —             | $P4/mmm(123)$ | —             | —                  | —     | —     | 44.9           | 5.72  | 8.07  | —               | 1.045          | 12.251            | —                 | —    | —    |
| OsMg <sub>2</sub> | HXX                       | —             | $Amm2(38)$    | —             | —                  | —     | —     | 44.6           | 9.01  | 6.25  | —               | 1.409          | 3.666             | —                 | —    | 2.5  |
| OsBa <sub>2</sub> | PXX                       | —             | —             | $C2/m(12)$    | —                  | —     | —     | —              | 5.65  | 8.00  | —               | 3.811          | 6.232             | —                 | —    | —    |
| IrBe <sub>2</sub> | HXX                       | —             | $P4/mmm(123)$ | —             | —                  | —     | —     | —              | 9.00  | 6.35  | —               | 3.230          | 10.834            | —                 | —    | —    |
| IrMg <sub>2</sub> | HXX                       | —             | $P4/mmm(123)$ | —             | —                  | —     | —     | —              | 6.95  | 9.83  | —               | 0.250          | 2.053             | —                 | —    | 0.0  |
| IrCa <sub>2</sub> | PHX                       | —             | $P4/mmm(123)$ | $P2_1/m(11)$  | 8.93               | 8.95  | 59.5  | 44.9           | 7.46  | 10.57 | —               | 0.362          | 1.981             | 0.0               | 0.0  | —    |
| IrSr <sub>2</sub> | HfX                       | $P3m1(164)$   | $P4/mmm(123)$ | —             | 9.28               | 9.29  | 59.5  | —              | —     | —     | —               | 0.965          | 2.130             | 0.0               | —    | —    |
| IrBa <sub>2</sub> | TXX                       | $P3m1(164)$   | —             | —             | —                  | —     | —     | —              | 6.41  | 8.39  | —               | 2.567          | 2.855             | —                 | —    | —    |
| PtBe <sub>2</sub> | HXX                       | —             | $Cmmm(65)$    | —             | —                  | —     | —     | —              | —     | —     | —               | —              | —                 | —                 | —    | —    |
| PtSr <sub>2</sub> | TXX                       | —             | $P3m1(164)$   | —             | 9.07               | 9.07  | 59.5  | —              | —     | —     | —               | —              | —                 | —                 | —    | —    |
| AuBe <sub>2</sub> | PXX                       | —             | —             | $P6/mmm(191)$ | —                  | —     | —     | —              | —     | —     | —               | 2.167          | 5.488             | —                 | —    | 0.0  |
| AuCa <sub>2</sub> | PTX                       | $P3m1(164)$   | —             | $P3m1(164)$   | 8.88               | 8.88  | 59.2  | —              | —     | —     | —               | 0.007          | 0.922             | 0.0               | —    | 0.0  |
| AuSr <sub>2</sub> | TXX                       | $P3m1(164)$   | —             | —             | 9.34               | 9.35  | 59.4  | —              | —     | —     | —               | 1.124          | 1.688             | —                 | —    | —    |

Table 75: List of TM-XII

| species           | initial structure indices | space group       |               | lattice parameters |       |       |                |       |       | relative energy |                | spin moment       |                   |     |      |   |
|-------------------|---------------------------|-------------------|---------------|--------------------|-------|-------|----------------|-------|-------|-----------------|----------------|-------------------|-------------------|-----|------|---|
|                   |                           | T                 | H             | a [Å]              | b [Å] | c [Å] | $\gamma$ [deg] | a [Å] | b [Å] | c [Å]           | $\gamma$ [deg] | $\Delta E_1$ [eV] | $\Delta E_2$ [eV] | T   | H    | P |
| ScHg <sub>2</sub> | THX                       | $P4/mmm(123)$     | $P6m2(187)$   | 6.60               | 9.37  | 44.8  | 7.03           | 6.76  | 58.3  | —               | —              | 0.457             | 3.630             | 0.0 | 0.0  | — |
| VCd <sub>2</sub>  | HTX                       | $Cmmm(65)$        | $Cmmm(65)$    | 6.93               | 9.05  | 39.6  | 8.64           | 5.99  | 43.7  | —               | —              | 0.725             | 8.211             | 0.0 | 0.0  | — |
| MnCd <sub>2</sub> | TXX                       | $Cmmm(65)$        | —             | 6.34               | 9.15  | 40.1  | —              | —     | —     | —               | —              | 0.878             | 5.182             | —   | 15.5 | — |
| NiHg <sub>2</sub> | HXX                       | —                 | $P4/mmm(123)$ | —                  | —     | —     | 8.51           | 5.99  | 43.8  | —               | —              | 3.814             | 3.885             | —   | 0.0  | — |
| RuHg <sub>2</sub> | TXX                       | $P4/mmm(123)$     | —             | 6.61               | 9.22  | 43.2  | —              | —     | —     | —               | —              | 1.278             | 6.618             | 0.0 | 0.0  | — |
| PdHg <sub>2</sub> | HTX                       | $C2/m(12)$        | $Pmmm(47)$    | 8.86               | 8.87  | 40.0  | 9.71           | 7.61  | 37.8  | —               | —              | 0.741             | 2.403             | 0.0 | 0.0  | — |
| PtCd <sub>2</sub> | HXX                       | —                 | $Pmmm(47)$    | —                  | —     | —     | 9.56           | 7.53  | 37.9  | —               | —              | 2.899             | 2.922             | —   | 0.0  | — |
| PuHg <sub>2</sub> | HTX                       | $P\bar{3}m1(164)$ | $Amm2(38)$    | 8.73               | 8.72  | 59.8  | 8.89           | 8.87  | 38.3  | —               | —              | 0.655             | 1.251             | 0.0 | 0.0  | — |
| AuHg <sub>2</sub> | HTX                       | $P\bar{3}m1(164)$ | $Amm2(38)$    | 9.44               | 9.43  | 58.5  | 9.11           | 9.09  | 36.8  | —               | —              | 0.323             | 0.914             | 0.0 | 0.0  | — |





Table 77: List of TM-XIV

| species           | initial structure indices | space group |   | lattice parameters |       |                |       |       |                | relative energy   |                   | spin moment |      |      |
|-------------------|---------------------------|-------------|---|--------------------|-------|----------------|-------|-------|----------------|-------------------|-------------------|-------------|------|------|
|                   |                           | T           | H | a [Å]              | b [Å] | $\gamma$ [deg] | a [Å] | b [Å] | $\gamma$ [deg] | $\Delta E_1$ [eV] | $\Delta E_2$ [eV] | T           | H    | P    |
| ScC <sub>2</sub>  | PXX                       | -           | - | -                  | -     | -              | 6.80  | 8.20  | 52.8           | 1.291             | 6.761             | -           | -    | 0.0  |
| ScGe <sub>2</sub> | HXX                       | -           | - | -                  | -     | 38.2           | 7.97  | 10.15 | 38.2           | 2.631             | 2.774             | -           | -    | 0.0  |
| ScSi <sub>2</sub> | PHX                       | -           | - | -                  | -     | 35.2           | 10.92 | 8.91  | 35.2           | 0.109             | 4.083             | -           | -    | 0.0  |
| ScPb <sub>2</sub> | PHT                       | -           | - | -                  | -     | 37.5           | 10.97 | 8.67  | 37.5           | 0.502             | 0.573             | 0.0         | 0.0  | 0.0  |
| TiC <sub>2</sub>  | PXX                       | -           | - | 10.98              | 8.71  | 37.3           | 10.98 | 8.71  | 37.3           | 0.502             | 0.573             | 0.0         | 0.0  | 0.0  |
| TiGe <sub>2</sub> | PHX                       | -           | - | -                  | -     | 34.4           | 8.02  | 9.72  | 34.4           | 0.003             | 1.876             | 0.0         | 0.0  | 0.0  |
| TiSi <sub>2</sub> | PHX                       | -           | - | -                  | -     | 35.7           | 8.37  | 10.33 | 35.7           | 0.013             | 9.388             | 0.0         | 0.0  | 0.0  |
| VGe <sub>2</sub>  | PTH                       | -           | - | 9.32               | 7.61  | 35.5           | 9.25  | 7.60  | 35.8           | 0.548             | 0.549             | 0.0         | 0.0  | 2.7  |
| VSi <sub>2</sub>  | HXX                       | -           | - | -                  | -     | 44.9           | 8.31  | 6.11  | 45.9           | 7.157             | 10.323            | -           | -    | 0.0  |
| VPb <sub>2</sub>  | PHX                       | -           | - | -                  | -     | 44.9           | 6.92  | 9.80  | 44.9           | 0.758             | 4.917             | -           | -    | 0.5  |
| CrC <sub>2</sub>  | PXX                       | -           | - | -                  | -     | -              | -     | -     | -              | 1.637             | 5.024             | -           | -    | 7.6  |
| CrGe <sub>2</sub> | PXX                       | -           | - | -                  | -     | -              | -     | -     | -              | 0.941             | 1.385             | -           | -    | 8.8  |
| CrSi <sub>2</sub> | HXX                       | -           | - | -                  | -     | 42.3           | 8.80  | 6.45  | 42.3           | 4.969             | 7.754             | -           | -    | 14.5 |
| CrPb <sub>2</sub> | PXX                       | -           | - | -                  | -     | 34.0           | 9.01  | 7.45  | 34.0           | 0.017             | 2.663             | 11.0        | 11.1 | 18.2 |
| MnSi <sub>2</sub> | HXX                       | -           | - | 7.44               | 9.01  | 34.0           | 9.01  | 7.45  | 34.0           | 3.872             | 7.001             | -           | -    | 15.3 |
| MnPb <sub>2</sub> | PHX                       | -           | - | -                  | -     | 43.5           | 9.98  | 7.95  | 36.9           | 0.124             | 3.399             | -           | -    | 15.7 |
| FeGe <sub>2</sub> | PXX                       | -           | - | -                  | -     | 42.0           | 7.17  | 10.13 | 43.5           | 1.728             | 1.741             | -           | -    | 7.6  |
| FeSi <sub>2</sub> | THX                       | -           | - | 6.41               | 8.64  | 42.0           | 8.64  | 6.42  | 42.0           | 0.018             | 8.822             | 9.7         | 9.7  | -    |
| CoC <sub>2</sub>  | TXX                       | -           | - | 5.89               | 5.61  | 44.4           | 5.89  | 5.61  | 44.4           | 2.261             | 3.502             | 0.0         | 0.0  | -    |
| CoSi <sub>2</sub> | HXX                       | -           | - | -                  | -     | 34.0           | 8.55  | 7.06  | 34.0           | 1.204             | 1.329             | -           | -    | 0.0  |
| NiSi <sub>2</sub> | HTP                       | -           | - | 8.32               | 6.49  | 49.8           | 7.04  | 7.04  | 49.5           | 0.383             | 0.556             | 0.0         | 0.0  | 0.0  |
| YSi <sub>2</sub>  | PXX                       | -           | - | -                  | -     | -              | 10.27 | 7.92  | 39.4           | 3.385             | 6.174             | -           | -    | 0.0  |
| YGe <sub>2</sub>  | PXX                       | -           | - | 10.75              | 10.75 | 42.9           | 10.75 | 10.75 | 42.9           | 0.387             | 4.699             | 0.0         | 0.0  | 0.0  |
| YSn <sub>2</sub>  | HXX                       | -           | - | 11.67              | 9.46  | 35.7           | 9.48  | 11.44 | 34.7           | 3.455             | 5.582             | -           | -    | 0.0  |
| YPb <sub>2</sub>  | PTH                       | -           | - | 7.66               | 8.50  | 44.5           | 7.66  | 8.50  | 44.5           | 0.012             | 0.023             | 0.0         | 0.0  | 0.0  |
| ZrC <sub>2</sub>  | PXX                       | -           | - | -                  | -     | 38.7           | 8.90  | 10.88 | 38.7           | 0.479             | 5.712             | 0.0         | 0.0  | 0.0  |
| ZrSi <sub>2</sub> | HXX                       | -           | - | -                  | -     | 40.2           | 9.67  | 7.38  | 40.2           | 2.408             | 7.072             | -           | -    | 0.0  |
| ZrGe <sub>2</sub> | HPX                       | -           | - | -                  | -     | 34.5           | 8.50  | 10.32 | 34.5           | 0.736             | 4.903             | -           | -    | 0.0  |
| ZrSi <sub>2</sub> | PTH                       | -           | - | 8.90               | 10.88 | 35.0           | 9.42  | 9.42  | 38.7           | 0.061             | 0.091             | 0.0         | 0.0  | 0.0  |
| ZrPb <sub>2</sub> | PXX                       | -           | - | -                  | -     | -              | -     | -     | -              | 0.916             | 0.927             | -           | -    | 0.0  |
| NbC <sub>2</sub>  | PXX                       | -           | - | -                  | -     | -              | -     | -     | -              | 3.852             | 11.023            | -           | -    | 0.0  |
| MoSi <sub>2</sub> | PXX                       | -           | - | -                  | -     | -              | -     | -     | -              | 1.556             | 1.700             | -           | -    | 0.0  |
| TcC <sub>2</sub>  | PXX                       | -           | - | 8.59               | 8.59  | 40.4           | 7.47  | 7.49  | 51.3           | 5.542             | 6.515             | -           | -    | 0.0  |
| TcSi <sub>2</sub> | THX                       | -           | - | -                  | -     | 40.4           | 7.47  | 7.49  | 51.3           | 0.278             | 0.964             | 0.0         | 0.0  | 0.0  |
| RuC <sub>2</sub>  | PXX                       | -           | - | 8.63               | 7.22  | 52.8           | 8.63  | 7.22  | 52.8           | 3.319             | 7.440             | -           | -    | 0.0  |
| PdPb <sub>2</sub> | PTH                       | -           | - | -                  | -     | 29.1           | 9.06  | 9.98  | 29.1           | 0.027             | 0.619             | 0.0         | 0.0  | 0.0  |
| AgSi <sub>2</sub> | HXX                       | -           | - | -                  | -     | 35.7           | 9.05  | 9.47  | 35.7           | 1.521             | 3.989             | -           | -    | 0.0  |
| AgGe <sub>2</sub> | PHX                       | -           | - | 8.87               | 9.45  | 43.8           | 8.87  | 9.45  | 43.8           | 0.406             | 2.470             | 0.0         | 0.0  | 0.0  |
| AgPb <sub>2</sub> | TXX                       | -           | - | -                  | -     | -              | -     | -     | -              | 1.367             | 1.829             | 0.0         | 0.0  | 0.0  |
| HfC <sub>2</sub>  | PXX                       | -           | - | -                  | -     | -              | -     | -     | -              | 4.052             | 8.259             | -           | -    | 0.0  |
| HfSi <sub>2</sub> | PHX                       | -           | - | -                  | -     | 40.0           | 7.33  | 9.57  | 40.0           | 0.002             | 6.863             | -           | -    | 0.0  |
| HfPb <sub>2</sub> | PXX                       | -           | - | -                  | -     | -              | 7.57  | 9.82  | 39.6           | 0.955             | 0.956             | -           | -    | 0.0  |
| HfPb <sub>2</sub> | PXX                       | -           | - | -                  | -     | -              | 9.16  | 11.20 | 34.3           | 0.916             | 3.420             | -           | -    | 0.0  |
| TaC <sub>2</sub>  | PXX                       | -           | - | -                  | -     | -              | 6.84  | 7.07  | 49.0           | 4.651             | 10.043            | -           | -    | 0.0  |
| WSi <sub>2</sub>  | HXX                       | -           | - | 8.56               | 8.56  | 40.3           | 6.14  | 9.01  | 40.7           | 5.683             | 15.239            | -           | -    | 0.0  |
| ReSi <sub>2</sub> | TXX                       | -           | - | -                  | -     | -              | -     | -     | -              | 0.861             | 1.573             | 0.0         | 0.0  | 0.0  |
| OsSi <sub>2</sub> | PXX                       | -           | - | -                  | -     | -              | -     | -     | -              | 2.880             | 3.261             | -           | -    | 0.0  |
| OsPb <sub>2</sub> | HXX                       | -           | - | 8.20               | 7.97  | 51.6           | 7.65  | 6.39  | 51.9           | 4.336             | 4.336             | -           | -    | 0.0  |
| IrSi <sub>2</sub> | HTX                       | -           | - | -                  | -     | 47.0           | 8.00  | 6.78  | 42.8           | 0.639             | 1.006             | 0.0         | 0.0  | 0.0  |
| IrGe <sub>2</sub> | HXX                       | -           | - | -                  | -     | 47.0           | 7.04  | 7.04  | 47.0           | 1.108             | 1.459             | -           | -    | 0.0  |
| IrPb <sub>2</sub> | TPX                       | -           | - | 7.34               | 7.05  | 61.7           | -     | -     | -              | 0.051             | 0.971             | 0.0         | 0.0  | 0.0  |
| PtSi <sub>2</sub> | HXX                       | -           | - | -                  | -     | 31.8           | 7.68  | 9.04  | 31.8           | 1.233             | 1.760             | -           | -    | 0.0  |
| PtPb <sub>2</sub> | TPH                       | -           | - | 7.39               | 8.04  | 57.0           | 7.24  | 7.22  | 60.0           | 0.005             | 0.141             | 0.0         | 0.0  | 0.0  |
| AuSi <sub>2</sub> | HXX                       | -           | - | -                  | -     | 36.1           | 9.64  | 8.43  | 31.2           | 1.789             | 3.293             | -           | -    | 0.0  |
| AuGe <sub>2</sub> | HXX                       | -           | - | -                  | -     | 36.1           | 8.91  | 8.89  | 36.1           | 0.908             | 0.962             | -           | -    | 0.0  |
| AuSi <sub>2</sub> | HXX                       | -           | - | -                  | -     | 42.3           | 6.49  | 8.83  | 42.3           | 2.861             | 2.870             | -           | -    | 0.0  |

(Continued on next page)

Table 77: List of TM-XIV

| (Continued from previous page) |                           | space group |                     |   | lattice parameters |       |         |       |       |         | relative energy |       | spin moment |                   |                   |                              |   |   |   |     |
|--------------------------------|---------------------------|-------------|---------------------|---|--------------------|-------|---------|-------|-------|---------|-----------------|-------|-------------|-------------------|-------------------|------------------------------|---|---|---|-----|
| species                        | initial structure indices | T           | H                   | P | a [Å]              | b [Å] | γ [deg] | a [Å] | b [Å] | γ [deg] | a [Å]           | b [Å] | γ [deg]     | $\Delta E_1$ [eV] | $\Delta E_2$ [eV] | $[\mu_B / \text{unit cell}]$ | T | H | P |     |
| AuPb <sub>2</sub>              | HXX                       | —           | <i>P4/mmm</i> (123) | — | —                  | —     | —       | 7.20  | 10.40 | 43.9    | —               | —     | —           | 0.933             | 0.981             | —                            | — | — | — | 0.0 |





Table 78: List of TM-XV

| species           | Initial structure indices | space group   |                   |       |                |       |       | lattice parameters |                |       |       |       |                | relative energy |              | spin moment           |                       |                       |
|-------------------|---------------------------|---------------|-------------------|-------|----------------|-------|-------|--------------------|----------------|-------|-------|-------|----------------|-----------------|--------------|-----------------------|-----------------------|-----------------------|
|                   |                           | T             |                   | H     |                | P     |       | T                  |                | H     |       | P     |                | $\Delta E_1$    | $\Delta E_2$ | T                     | H                     | P                     |
|                   |                           | a [Å]         | b [Å]             | c [Å] | $\gamma$ [deg] | a [Å] | b [Å] | c [Å]              | $\gamma$ [deg] | a [Å] | b [Å] | c [Å] | $\gamma$ [deg] | [eV]            | [eV]         | [ $\mu_B$ /unit cell] | [ $\mu_B$ /unit cell] | [ $\mu_B$ /unit cell] |
| WAs <sub>2</sub>  | HXX                       | —             | —                 | —     | —              | 7.39  | 7.43  | 60.2               | —              | —     | —     | —     | 2.084          | 10.262          | —            | —                     | 0.0                   | —                     |
| WSb <sub>2</sub>  | TPX                       | $P\bar{1}(2)$ | $P6m2(187)$       | —     | 7.99           | 7.13  | 46.8  | —                  | 7.40           | 6.81  | 63.7  | —     | 0.049          | 4.571           | 0.0          | —                     | 0.0                   | —                     |
| ReN <sub>2</sub>  | THX                       | $P1(1)$       | $P6m2(187)$       | —     | 6.36           | 6.10  | 57.8  | —                  | 5.76           | 5.77  | 60.1  | —     | 0.018          | 1.863           | 0.0          | —                     | 0.0                   | —                     |
| ReBi <sub>2</sub> | TPX                       | $P2_1/m(11)$  | —                 | —     | 7.38           | 7.37  | 54.4  | —                  | 7.37           | 7.32  | 54.2  | —     | 0.382          | 1.551           | 0.0          | —                     | 0.0                   | —                     |
| OsN <sub>2</sub>  | THX                       | $P1(1)$       | $P\bar{6}m2(187)$ | —     | 6.17           | 6.49  | 58.1  | —                  | 5.65           | 5.64  | 59.8  | —     | 0.049          | 0.888           | 0.0          | —                     | 0.0                   | —                     |
| OsSb <sub>2</sub> | TPX                       | $P\bar{1}(2)$ | —                 | —     | 7.32           | 7.18  | 59.6  | —                  | 7.21           | 7.18  | 61.1  | —     | 0.007          | 1.738           | 0.0          | —                     | 0.0                   | —                     |
| OsBi <sub>2</sub> | PTH                       | $P\bar{1}(2)$ | $Pnm2(25)$        | —     | 7.32           | 7.31  | 61.0  | —                  | 7.32           | 7.32  | 52.2  | —     | 0.001          | 0.655           | 0.0          | —                     | 0.0                   | —                     |
| IrN <sub>2</sub>  | TPX                       | $C2/m(12)$    | —                 | —     | 6.08           | 6.12  | 59.9  | —                  | 6.12           | 6.09  | 59.9  | —     | 0.001          | 1.903           | 0.0          | —                     | 0.0                   | —                     |
| IrP <sub>2</sub>  | TPX                       | $P\bar{1}(2)$ | —                 | —     | 7.53           | 8.02  | 51.0  | —                  | 8.03           | 7.53  | 51.1  | —     | 0.010          | 0.974           | 0.0          | —                     | 0.0                   | —                     |
| IrSb <sub>2</sub> | TXX                       | $P2_1/m(11)$  | —                 | —     | 7.25           | 8.03  | 56.3  | —                  | —              | —     | —     | —     | 0.937          | 1.265           | 0.0          | —                     | —                     | —                     |
| PtP <sub>2</sub>  | TPH                       | $C2/m(12)$    | $Pm(6)$           | —     | 7.99           | 7.99  | 53.2  | —                  | 7.78           | 7.73  | 51.1  | —     | 0.007          | 0.282           | 0.0          | —                     | 0.0                   | —                     |
| PtAs <sub>2</sub> | TPH                       | $C2/m(12)$    | $Am2(38)$         | —     | 8.31           | 8.31  | 53.4  | —                  | 8.32           | 8.32  | 40.4  | —     | 0.052          | 0.125           | 0.0          | —                     | 0.0                   | —                     |
| PtBi <sub>2</sub> | HTP                       | $P3m1(164)$   | $Am2(38)$         | —     | 8.76           | 8.68  | 58.8  | —                  | 7.10           | 8.60  | 52.6  | —     | 0.545          | 0.545           | 0.0          | —                     | 0.0                   | —                     |
| AuP <sub>2</sub>  | TPX                       | $P2/m(10)$    | —                 | —     | 11.09          | 7.68  | 46.9  | —                  | 9.01           | 9.00  | 50.4  | —     | 0.664          | 1.583           | 0.0          | —                     | 0.0                   | —                     |
| AuSb <sub>2</sub> | HTX                       | $P3m1(164)$   | $Pc(7)$           | —     | 8.60           | 8.57  | 59.3  | —                  | 9.04           | 9.05  | 44.3  | —     | 0.171          | 1.440           | 0.0          | —                     | 0.0                   | —                     |
| AuBi <sub>2</sub> | HPT                       | $P3m1(164)$   | $Am2(38)$         | —     | 8.89           | 8.88  | 57.7  | —                  | 9.23           | 9.23  | 45.3  | —     | 0.112          | 0.325           | 0.0          | —                     | 0.0                   | —                     |

Table 79: List of TM-XVI

| species           | Initial structure indices | space group |   | lattice parameters |       |       |                |       |       | relative energy |                   | spin moment       |   |   |   |     |
|-------------------|---------------------------|-------------|---|--------------------|-------|-------|----------------|-------|-------|-----------------|-------------------|-------------------|---|---|---|-----|
|                   |                           | T           | H | a [Å]              | b [Å] | c [Å] | $\gamma$ [deg] | a [Å] | b [Å] | $\gamma$ [deg]  | $\Delta E_1$ [eV] | $\Delta E_2$ [eV] | T | H | P |     |
| ScO <sub>2</sub>  | PXX                       | —           | — | —                  | —     | —     | —              | 5.77  | 7.32  | 55.5            | 2.577             | 3.186             | — | — | — | 0.0 |
| ScS <sub>2</sub>  | PXX                       | —           | — | —                  | —     | —     | —              | 9.53  | 8.94  | 46.3            | 1.311             | 1.457             | — | — | — | 0.0 |
| ScSe <sub>2</sub> | PXX                       | —           | — | —                  | —     | —     | —              | —     | —     | —               | —                 | —                 | — | — | — | —   |
| ScTe <sub>2</sub> | PXX                       | —           | — | —                  | —     | —     | —              | —     | —     | —               | —                 | —                 | — | — | — | —   |
| TiS <sub>2</sub>  | PXX                       | —           | — | —                  | —     | —     | —              | —     | —     | —               | —                 | —                 | — | — | — | —   |
| TiSe <sub>2</sub> | PXX                       | —           | — | —                  | —     | —     | —              | —     | —     | —               | —                 | —                 | — | — | — | —   |
| TiTe <sub>2</sub> | PXX                       | —           | — | —                  | —     | —     | —              | —     | —     | —               | —                 | —                 | — | — | — | —   |
| VO <sub>2</sub>   | PXX                       | —           | — | —                  | —     | —     | —              | —     | —     | —               | —                 | —                 | — | — | — | —   |
| VS <sub>2</sub>   | PXX                       | —           | — | —                  | —     | —     | —              | —     | —     | —               | —                 | —                 | — | — | — | —   |
| VS <sub>2</sub>   | PXX                       | —           | — | —                  | —     | —     | —              | —     | —     | —               | —                 | —                 | — | — | — | —   |
| VTe <sub>2</sub>  | PXX                       | —           | — | —                  | —     | —     | —              | —     | —     | —               | —                 | —                 | — | — | — | —   |
| CrO <sub>2</sub>  | PXX                       | —           | — | —                  | —     | —     | —              | —     | —     | —               | —                 | —                 | — | — | — | —   |
| CrS <sub>2</sub>  | PXX                       | —           | — | —                  | —     | —     | —              | —     | —     | —               | —                 | —                 | — | — | — | —   |
| CrSe <sub>2</sub> | PXX                       | —           | — | —                  | —     | —     | —              | —     | —     | —               | —                 | —                 | — | — | — | —   |
| MnO <sub>2</sub>  | PXX                       | —           | — | —                  | —     | —     | —              | —     | —     | —               | —                 | —                 | — | — | — | —   |
| MnS <sub>2</sub>  | PXX                       | —           | — | —                  | —     | —     | —              | —     | —     | —               | —                 | —                 | — | — | — | —   |
| MnSe <sub>2</sub> | PXX                       | —           | — | —                  | —     | —     | —              | —     | —     | —               | —                 | —                 | — | — | — | —   |
| FeO <sub>2</sub>  | PXX                       | —           | — | —                  | —     | —     | —              | —     | —     | —               | —                 | —                 | — | — | — | —   |
| FeS <sub>2</sub>  | PXX                       | —           | — | —                  | —     | —     | —              | —     | —     | —               | —                 | —                 | — | — | — | —   |
| FeSe <sub>2</sub> | PXX                       | —           | — | —                  | —     | —     | —              | —     | —     | —               | —                 | —                 | — | — | — | —   |
| CoO <sub>2</sub>  | PXX                       | —           | — | —                  | —     | —     | —              | —     | —     | —               | —                 | —                 | — | — | — | —   |
| CoS <sub>2</sub>  | PXX                       | —           | — | —                  | —     | —     | —              | —     | —     | —               | —                 | —                 | — | — | — | —   |
| CoSe <sub>2</sub> | PXX                       | —           | — | —                  | —     | —     | —              | —     | —     | —               | —                 | —                 | — | — | — | —   |
| NiO <sub>2</sub>  | PXX                       | —           | — | —                  | —     | —     | —              | —     | —     | —               | —                 | —                 | — | — | — | —   |
| NiS <sub>2</sub>  | PXX                       | —           | — | —                  | —     | —     | —              | —     | —     | —               | —                 | —                 | — | — | — | —   |
| NiSe <sub>2</sub> | PXX                       | —           | — | —                  | —     | —     | —              | —     | —     | —               | —                 | —                 | — | — | — | —   |
| YO <sub>2</sub>   | PXX                       | —           | — | —                  | —     | —     | —              | —     | —     | —               | —                 | —                 | — | — | — | —   |
| YS <sub>2</sub>   | PXX                       | —           | — | —                  | —     | —     | —              | —     | —     | —               | —                 | —                 | — | — | — | —   |
| YSe <sub>2</sub>  | PXX                       | —           | — | —                  | —     | —     | —              | —     | —     | —               | —                 | —                 | — | — | — | —   |
| ZrO <sub>2</sub>  | PXX                       | —           | — | —                  | —     | —     | —              | —     | —     | —               | —                 | —                 | — | — | — | —   |
| ZrS <sub>2</sub>  | PXX                       | —           | — | —                  | —     | —     | —              | —     | —     | —               | —                 | —                 | — | — | — | —   |
| ZrSe <sub>2</sub> | PXX                       | —           | — | —                  | —     | —     | —              | —     | —     | —               | —                 | —                 | — | — | — | —   |
| ZrTe <sub>2</sub> | PXX                       | —           | — | —                  | —     | —     | —              | —     | —     | —               | —                 | —                 | — | — | — | —   |
| NbO <sub>2</sub>  | PXX                       | —           | — | —                  | —     | —     | —              | —     | —     | —               | —                 | —                 | — | — | — | —   |
| NbS <sub>2</sub>  | PXX                       | —           | — | —                  | —     | —     | —              | —     | —     | —               | —                 | —                 | — | — | — | —   |
| NbSe <sub>2</sub> | PXX                       | —           | — | —                  | —     | —     | —              | —     | —     | —               | —                 | —                 | — | — | — | —   |
| NbTe <sub>2</sub> | PXX                       | —           | — | —                  | —     | —     | —              | —     | —     | —               | —                 | —                 | — | — | — | —   |
| MoO <sub>2</sub>  | PXX                       | —           | — | —                  | —     | —     | —              | —     | —     | —               | —                 | —                 | — | — | — | —   |
| MoS <sub>2</sub>  | PXX                       | —           | — | —                  | —     | —     | —              | —     | —     | —               | —                 | —                 | — | — | — | —   |
| MoSe <sub>2</sub> | PXX                       | —           | — | —                  | —     | —     | —              | —     | —     | —               | —                 | —                 | — | — | — | —   |
| MoTe <sub>2</sub> | PXX                       | —           | — | —                  | —     | —     | —              | —     | —     | —               | —                 | —                 | — | — | — | —   |
| TcO <sub>2</sub>  | PXX                       | —           | — | —                  | —     | —     | —              | —     | —     | —               | —                 | —                 | — | — | — | —   |
| TcS <sub>2</sub>  | PXX                       | —           | — | —                  | —     | —     | —              | —     | —     | —               | —                 | —                 | — | — | — | —   |
| TcSe <sub>2</sub> | PXX                       | —           | — | —                  | —     | —     | —              | —     | —     | —               | —                 | —                 | — | — | — | —   |
| TcTe <sub>2</sub> | PXX                       | —           | — | —                  | —     | —     | —              | —     | —     | —               | —                 | —                 | — | — | — | —   |
| RuO <sub>2</sub>  | PXX                       | —           | — | —                  | —     | —     | —              | —     | —     | —               | —                 | —                 | — | — | — | —   |
| RuS <sub>2</sub>  | PXX                       | —           | — | —                  | —     | —     | —              | —     | —     | —               | —                 | —                 | — | — | — | —   |
| RuSe <sub>2</sub> | PXX                       | —           | — | —                  | —     | —     | —              | —     | —     | —               | —                 | —                 | — | — | — | —   |
| RuTe <sub>2</sub> | PXX                       | —           | — | —                  | —     | —     | —              | —     | —     | —               | —                 | —                 | — | — | — | —   |
| RhO <sub>2</sub>  | PXX                       | —           | — | —                  | —     | —     | —              | —     | —     | —               | —                 | —                 | — | — | — | —   |
| RhS <sub>2</sub>  | PXX                       | —           | — | —                  | —     | —     | —              | —     | —     | —               | —                 | —                 | — | — | — | —   |
| RhSe <sub>2</sub> | PXX                       | —           | — | —                  | —     | —     | —              | —     | —     | —               | —                 | —                 | — | — | — | —   |
| RhTe <sub>2</sub> | PXX                       | —           | — | —                  | —     | —     | —              | —     | —     | —               | —                 | —                 | — | — | — | —   |
| PdO <sub>2</sub>  | PXX                       | —           | — | —                  | —     | —     | —              | —     | —     | —               | —                 | —                 | — | — | — | —   |
| PdS <sub>2</sub>  | PXX                       | —           | — | —                  | —     | —     | —              | —     | —     | —               | —                 | —                 | — | — | — | —   |
| PdSe <sub>2</sub> | PXX                       | —           | — | —                  | —     | —     | —              | —     | —     | —               | —                 | —                 | — | — | — | —   |
| PdTe <sub>2</sub> | PXX                       | —           | — | —                  | —     | —     | —              | —     | —     | —               | —                 | —                 | — | — | — | —   |
| AgO <sub>2</sub>  | PXX                       | —           | — | —                  | —     | —     | —              | —     | —     | —               | —                 | —                 | — | — | — | —   |

(Continued on next page)

Table 79: List of TM-XVI

| species           | Initial structure indices | space group |   |               | lattice parameters |       |       |                |       |       | relative energy |                | spin moment       |                   |       |       |     |     |     |
|-------------------|---------------------------|-------------|---|---------------|--------------------|-------|-------|----------------|-------|-------|-----------------|----------------|-------------------|-------------------|-------|-------|-----|-----|-----|
|                   |                           | T           | H | P             | a [Å]              | b [Å] | c [Å] | $\gamma$ [deg] | a [Å] | b [Å] | c [Å]           | $\gamma$ [deg] | $\Delta E_1$ [eV] | $\Delta E_2$ [eV] | T     | H     | P   |     |     |
|                   |                           |             |   |               |                    |       |       |                |       |       |                 |                |                   |                   |       |       |     |     |     |
| AgS <sub>2</sub>  | PXX                       | —           | — | $P\bar{1}(2)$ | —                  | —     | —     | —              | —     | —     | —               | 9.42           | 12.17             | 37.6              | 2.184 | 4.385 | —   | —   | 0.0 |
| AgSe <sub>2</sub> | PXX                       | —           | — | $Cmme(67)$    | —                  | —     | —     | —              | —     | —     | —               | 10.39          | 13.02             | 35.2              | 2.171 | 3.360 | —   | —   | 0.0 |
| HfO <sub>2</sub>  | HXX                       | —           | — | —             | —                  | —     | —     | —              | —     | —     | —               | —              | —                 | —                 | 1.359 | 1.371 | —   | —   | —   |
| HfS <sub>2</sub>  | HXX                       | —           | — | —             | —                  | —     | —     | —              | —     | —     | —               | —              | —                 | —                 | 1.150 | 2.406 | 0.0 | 0.0 | —   |
| HfSe <sub>2</sub> | HXX                       | —           | — | —             | —                  | —     | —     | —              | —     | —     | —               | —              | —                 | —                 | 0.001 | 1.854 | 0.0 | —   | 0.0 |
| HfTe <sub>2</sub> | HXX                       | —           | — | —             | —                  | —     | —     | —              | —     | —     | —               | —              | —                 | —                 | 0.005 | 1.351 | 0.0 | —   | 0.0 |
| TaO <sub>2</sub>  | HXX                       | —           | — | —             | —                  | —     | —     | —              | —     | —     | —               | —              | —                 | —                 | 0.239 | 0.595 | 0.0 | 0.0 | 0.0 |
| TaS <sub>2</sub>  | HXX                       | —           | — | —             | —                  | —     | —     | —              | —     | —     | —               | —              | —                 | —                 | 0.242 | 0.728 | 0.0 | 0.0 | 0.0 |
| TaSe <sub>2</sub> | HXX                       | —           | — | —             | —                  | —     | —     | —              | —     | —     | —               | —              | —                 | —                 | 0.282 | 0.284 | 0.0 | 0.0 | 0.0 |
| TaTe <sub>2</sub> | HXX                       | —           | — | —             | —                  | —     | —     | —              | —     | —     | —               | —              | —                 | —                 | 0.111 | 0.115 | 0.0 | 0.0 | 0.0 |
| WO <sub>2</sub>   | HXX                       | —           | — | —             | —                  | —     | —     | —              | —     | —     | —               | —              | —                 | —                 | 2.620 | 2.722 | —   | —   | —   |
| WS <sub>2</sub>   | HXX                       | —           | — | —             | —                  | —     | —     | —              | —     | —     | —               | —              | —                 | —                 | 2.345 | 4.115 | —   | —   | —   |
| WSe <sub>2</sub>  | HXX                       | —           | — | —             | —                  | —     | —     | —              | —     | —     | —               | —              | —                 | —                 | 1.257 | 1.281 | —   | —   | —   |
| WTe <sub>2</sub>  | HXX                       | —           | — | —             | —                  | —     | —     | —              | —     | —     | —               | —              | —                 | —                 | 0.004 | 0.473 | 0.0 | 0.0 | 0.0 |
| ReO <sub>2</sub>  | TPX                       | —           | — | $P2_1/m(11)$  | 7.05               | 7.27  | 61.0  | —              | —     | —     | —               | 7.27           | 7.04              | 61.0              | 0.013 | 3.965 | 0.0 | —   | 0.0 |
| ReS <sub>2</sub>  | TPX                       | —           | — | $P\bar{1}(2)$ | 5.70               | 5.78  | 60.1  | —              | —     | —     | —               | 5.78           | 5.74              | 59.3              | 0.004 | 2.516 | 0.0 | —   | 0.0 |
| ReSe <sub>2</sub> | TPX                       | —           | — | $P\bar{1}(2)$ | 6.60               | 6.54  | 58.7  | —              | —     | —     | —               | 6.44           | 6.60              | 60.2              | 0.004 | 2.313 | 0.0 | —   | 0.0 |
| ReTe <sub>2</sub> | TPX                       | —           | — | $C2/m(12)$    | 6.86               | 6.67  | 60.3  | —              | —     | —     | —               | 6.86           | 6.68              | 60.2              | 0.093 | 2.313 | 0.0 | —   | 0.0 |
| OsS <sub>2</sub>  | TPX                       | —           | — | $P\bar{1}(2)$ | 7.13               | 7.31  | 60.4  | —              | —     | —     | —               | 7.30           | 7.26              | 58.6              | 0.007 | 1.876 | 0.0 | —   | 0.0 |
| OsSe <sub>2</sub> | TPX                       | —           | — | $P2_1/m(11)$  | 6.63               | 7.11  | 57.6  | —              | —     | —     | —               | 7.11           | 6.62              | 57.6              | 0.005 | 3.611 | 0.0 | —   | 0.0 |
| OsTe <sub>2</sub> | TPX                       | —           | — | $P2_1/m(11)$  | 6.87               | 7.37  | 57.6  | —              | —     | —     | —               | 7.37           | 6.87              | 57.6              | 0.005 | 3.117 | 0.0 | —   | 0.0 |
| IrO <sub>2</sub>  | TPX                       | —           | — | $C2/m(12)$    | 7.80               | 7.32  | 57.8  | —              | —     | —     | —               | 7.79           | 7.32              | 57.6              | 0.221 | 3.032 | 0.0 | —   | 0.0 |
| IrS <sub>2</sub>  | TPX                       | —           | — | $P3m1(164)$   | 6.35               | 6.37  | 55.1  | —              | —     | —     | —               | 6.29           | 6.29              | 60.4              | 0.059 | 2.606 | 0.0 | —   | 0.0 |
| IrSe <sub>2</sub> | TPX                       | —           | — | $P\bar{1}(2)$ | 7.16               | 7.23  | 53.7  | —              | —     | —     | —               | —              | —                 | —                 | 2.809 | 3.443 | 0.0 | —   | —   |
| IrTe <sub>2</sub> | TPX                       | —           | — | $P\bar{1}(2)$ | 7.46               | 7.54  | 53.3  | —              | —     | —     | —               | —              | —                 | —                 | 2.084 | 3.579 | 0.0 | —   | —   |
| PtO <sub>2</sub>  | TPX                       | —           | — | $P\bar{1}(2)$ | 7.96               | 8.03  | 53.1  | —              | —     | —     | —               | —              | —                 | —                 | 2.618 | 2.666 | 0.0 | —   | —   |
| PtS <sub>2</sub>  | TPX                       | —           | — | $P3m1(164)$   | 6.30               | 6.30  | 60.1  | —              | —     | —     | —               | 6.31           | 6.31              | 60.0              | 0.002 | 4.501 | 0.0 | —   | 0.0 |
| PtSe <sub>2</sub> | TPX                       | —           | — | $P3m1(164)$   | 7.20               | 7.20  | 60.0  | —              | —     | —     | —               | 7.20           | 7.20              | 60.0              | 0.007 | 2.936 | 0.0 | —   | 0.0 |
| PtTe <sub>2</sub> | TPX                       | —           | — | $P3m1(164)$   | 7.53               | 7.53  | 60.1  | —              | —     | —     | —               | —              | —                 | —                 | 3.643 | 5.429 | 0.0 | —   | —   |
| AuO <sub>2</sub>  | PTH                       | —           | — | $C2/m(12)$    | 8.06               | 8.06  | 60.0  | —              | —     | —     | —               | 8.07           | 8.07              | 59.9              | 0.033 | 3.900 | 0.0 | —   | 0.0 |
| AuS <sub>2</sub>  | PXX                       | —           | — | $P2_1/m(10)$  | 6.93               | 6.93  | 53.9  | —              | —     | —     | —               | 6.14           | 7.79              | 66.7              | 0.371 | 0.371 | 3.3 | 4.0 | 0.0 |
| AuSe <sub>2</sub> | HPT                       | —           | — | $P\bar{1}(2)$ | —                  | —     | —     | —              | —     | —     | —               | —              | —                 | —                 | 10.41 | 1.253 | —   | —   | —   |
| AuTe <sub>2</sub> | TPX                       | —           | — | $C2/m(12)$    | 7.62               | 7.61  | 60.0  | —              | —     | —     | —               | 7.83           | 11.25             | 44.2              | 0.426 | 0.545 | 0.0 | 0.0 | 0.0 |
|                   |                           | —           | — | $P2_1/m(11)$  | 8.11               | 8.10  | 59.9  | —              | —     | —     | —               | 10.47          | 10.47             | 61.3              | 0.024 | 0.917 | 0.0 | —   | 0.0 |

(Continued from previous page)

Table 80: List of TM-XXVII

| species           | Initial structure indices | space group       |                   |       | lattice parameters |       |                |       |       |                | relative energy   |                   | spin moment |      |   |
|-------------------|---------------------------|-------------------|-------------------|-------|--------------------|-------|----------------|-------|-------|----------------|-------------------|-------------------|-------------|------|---|
|                   |                           | T                 | H                 | P     | T                  |       |                | H     |       |                | $\Delta E_1$ [eV] | $\Delta E_2$ [eV] | T           | H    | P |
|                   |                           |                   |                   |       | a [Å]              | b [Å] | $\gamma$ [deg] | a [Å] | b [Å] | $\gamma$ [deg] |                   |                   |             |      |   |
| ScF <sub>2</sub>  | PHX                       | $P6m2(187)$       | $P\bar{1}(2)$     | 7.28  | 7.11               | 6.29  | 60.0           | 63.1  | 63.1  | 0.652          | 0.827             | 0.7               | 4.0         | 0.0  |   |
| ScCl <sub>2</sub> | HTX                       | $P6m2(187)$       | $P\bar{1}(2)$     | 7.28  | 7.11               | 6.29  | 59.7           | 63.1  | 63.1  | 0.085          | 2.970             | 0.7               | 3.7         | —    |   |
| ScBr <sub>2</sub> | HTX                       | $P6m2(187)$       | —                 | 7.61  | 7.61               | 7.42  | 59.9           | 59.9  | 59.9  | 0.156          | 2.274             | 0.0               | 3.8         | —    |   |
| Sc <sub>2</sub>   | THX                       | $P6m2(187)$       | —                 | 8.16  | 8.16               | 7.99  | 59.9           | 59.9  | 59.9  | 0.125          | 0.956             | 0.0               | 3.7         | —    |   |
| TiF <sub>2</sub>  | HXX                       | $P6m2(187)$       | —                 | —     | —                  | 5.70  | 60.0           | —     | —     | 2.451          | 2.491             | —                 | 0.0         | —    |   |
| TiCl <sub>2</sub> | HXX                       | $P6m2(187)$       | $P2_1/m(11)$      | —     | —                  | 6.55  | 59.9           | 60.9  | 60.9  | 0.179          | 1.369             | —                 | 0.0         | 0.0  |   |
| TiBr <sub>2</sub> | HTP                       | $P6m2(187)$       | $P2_1/m(11)$      | 7.36  | 7.64               | 6.93  | 60.0           | 69.3  | 69.3  | 0.670          | 0.720             | 7.8               | 0.0         | 0.0  |   |
| VF <sub>2</sub>   | PTX                       | —                 | $P3m1(164)$       | 6.43  | 6.45               | —     | —              | —     | —     | 0.014          | 2.829             | 12.0              | —           | 12.0 |   |
| VCl <sub>2</sub>  | PTH                       | —                 | $P3m1(164)$       | 7.21  | 7.21               | —     | —              | —     | —     | 0.001          | 1.961             | 12.0              | —           | 12.0 |   |
| VBr <sub>2</sub>  | TPX                       | —                 | $P3m1(164)$       | 7.58  | 7.58               | —     | —              | —     | —     | 0.007          | 1.825             | 12.0              | —           | 12.0 |   |
| VI <sub>2</sub>   | TXX                       | —                 | —                 | 8.17  | 8.18               | 59.9  | —              | —     | —     | 1.407          | 3.176             | 12.0              | —           | —    |   |
| CrBr <sub>2</sub> | THX                       | $Cmnm(65)$        | —                 | 8.07  | 8.07               | 53.5  | —              | —     | —     | 0.554          | 2.069             | 16.0              | 16.0        | —    |   |
| Cr <sub>2</sub>   | HTX                       | $C2/m(12)$        | $P\bar{3}m1(164)$ | 8.68  | 8.68               | 53.8  | 54.6           | —     | —     | 0.001          | 3.470             | 16.0              | 16.0        | —    |   |
| MnF <sub>2</sub>  | TPX                       | —                 | —                 | 6.73  | 6.73               | 59.8  | —              | 59.8  | 59.8  | 0.004          | 2.553             | 20.0              | —           | 20.0 |   |
| MnCl <sub>2</sub> | TXX                       | —                 | —                 | 7.45  | 7.46               | 59.8  | —              | —     | —     | 0.942          | 1.647             | 20.0              | —           | —    |   |
| MnBr <sub>2</sub> | TXX                       | —                 | —                 | 7.79  | 7.80               | 59.8  | —              | —     | —     | 0.941          | 1.621             | 20.0              | —           | —    |   |
| FeF <sub>2</sub>  | TPH                       | $P\bar{6}m2(187)$ | $P\bar{3}m1(164)$ | 6.35  | 6.39               | 59.6  | 59.7           | 59.6  | 59.6  | 0.001          | 0.566             | 16.0              | 16.0        | 16.0 |   |
| CoF <sub>2</sub>  | PTX                       | —                 | $P3m1(164)$       | 6.30  | 6.30               | 59.3  | —              | 59.4  | 59.4  | 0.032          | 2.104             | 12.0              | —           | 12.0 |   |
| CoBr <sub>2</sub> | TXX                       | —                 | —                 | 7.47  | 7.48               | 59.6  | —              | —     | —     | 1.436          | 2.428             | 11.9              | —           | —    |   |
| NiBr <sub>2</sub> | TXX                       | —                 | —                 | 7.40  | 7.39               | 59.6  | —              | —     | —     | 1.535          | 1.574             | 8.0               | —           | —    |   |
| Ni <sub>2</sub>   | TXX                       | —                 | —                 | 7.96  | 7.95               | 59.6  | —              | —     | —     | 2.497          | 3.016             | 7.8               | —           | —    |   |
| YF <sub>2</sub>   | HPX                       | $P6m2(187)$       | $P\bar{3}m1(164)$ | —     | —                  | 6.85  | 60.0           | 60.1  | 60.1  | 0.756          | 0.865             | —                 | 4.0         | 3.6  |   |
| YCl <sub>2</sub>  | HPX                       | $P6m2(187)$       | $P3m1(156)$       | 7.53  | 7.52               | 59.8  | 60.0           | 60.0  | 60.0  | 0.685          | 0.867             | —                 | 3.9         | 0.0  |   |
| YBr <sub>2</sub>  | HP T                      | $P6m2(187)$       | $C2/m(12)$        | 7.91  | 7.90               | 58.4  | —              | —     | —     | 0.601          | 0.698             | 0.0               | 3.9         | 0.0  |   |
| YI <sub>2</sub>   | HP T                      | $P6m2(187)$       | $C2/m(12)$        | 8.39  | 8.39               | 58.9  | —              | —     | —     | 0.601          | 0.698             | 0.0               | 3.9         | 0.0  |   |
| ZrF <sub>2</sub>  | HXX                       | $P6m2(187)$       | —                 | —     | —                  | 6.23  | 60.0           | 60.3  | 60.3  | 0.339          | 0.412             | 0.0               | 3.7         | 0.8  |   |
| ZrCl <sub>2</sub> | HTP                       | $P6m2(187)$       | $P2_1/m(11)$      | 7.11  | 6.71               | 61.8  | 61.8           | 60.4  | 60.4  | 0.876          | 0.892             | 0.0               | 0.0         | 0.0  |   |
| ZrBr <sub>2</sub> | HTP                       | $P6m2(187)$       | $P2_1/m(11)$      | 7.01  | 7.40               | 61.6  | 60.1           | 60.1  | 60.1  | 0.436          | 0.440             | 0.0               | 0.0         | 0.0  |   |
| Zr <sub>2</sub>   | TPH                       | $P6m2(187)$       | $P2_1/m(11)$      | 7.57  | 7.88               | 61.3  | —              | —     | —     | 0.024          | 0.028             | 0.0               | 0.0         | 0.0  |   |
| NbF <sub>2</sub>  | HXX                       | $P1(2)$           | —                 | —     | —                  | 6.58  | 64.6           | 52.4  | —     | 0.035          | 0.337             | 0.0               | 0.0         | 0.0  |   |
| NbCl <sub>2</sub> | HXX                       | $Pmm2(25)$        | —                 | —     | —                  | 6.74  | 66.0           | 60.6  | —     | 2.240          | 4.478             | 0.0               | 0.8         | —    |   |
| NbBr <sub>2</sub> | HXX                       | $Pmm2(25)$        | —                 | —     | —                  | 6.74  | 66.0           | 60.6  | —     | 3.274          | 3.278             | —                 | 0.0         | —    |   |
| Nb <sub>2</sub>   | HXX                       | $Pmm2(25)$        | —                 | —     | —                  | 7.09  | 7.09           | 57.9  | —     | 2.904          | 2.906             | —                 | 0.0         | —    |   |
| MoF <sub>2</sub>  | HXX                       | $P2/m(10)$        | —                 | —     | —                  | 7.65  | 7.65           | 57.4  | —     | 1.714          | 1.715             | —                 | 0.0         | —    |   |
| MoCl <sub>2</sub> | PTH                       | $Cmnm(65)$        | $P2_1/c(14)$      | 8.81  | 8.81               | 49.2  | 52.0           | 52.0  | 52.0  | 6.516          | 6.522             | —                 | 0.0         | —    |   |
| MoBr <sub>2</sub> | THP                       | $Cmnm(65)$        | $C2/m(12)$        | 8.92  | 8.92               | 50.9  | 54.8           | 54.8  | 54.8  | 0.039          | 0.176             | 16.0              | 16.0        | 16.0 |   |
| Mo <sub>2</sub>   | THX                       | $Cmnm(65)$        | —                 | 9.33  | 9.33               | 51.8  | —              | —     | —     | 0.198          | 0.629             | 16.0              | 16.0        | 16.0 |   |
| TcF <sub>2</sub>  | PXX                       | —                 | $P\bar{1}(2)$     | —     | —                  | 8.96  | 8.97           | 54.0  | —     | 0.269          | 2.477             | 15.9              | 16.0        | —    |   |
| Tc <sub>2</sub>   | TXX                       | —                 | —                 | 8.19  | 8.19               | 57.3  | —              | —     | —     | 0.992          | 2.717             | —                 | —           | 16.0 |   |
| RuF <sub>2</sub>  | PTX                       | —                 | $Cm(8)$           | 7.14  | 6.99               | 51.8  | —              | —     | —     | 2.457          | 3.271             | 4.0               | —           | —    |   |
| RuCl <sub>2</sub> | TXX                       | —                 | —                 | 7.24  | 7.24               | 59.9  | —              | —     | —     | 0.793          | 0.962             | 15.9              | —           | 12.0 |   |
| RuBr <sub>2</sub> | TXX                       | —                 | —                 | 7.63  | 7.63               | 59.9  | —              | —     | —     | 3.699          | 4.041             | —                 | —           | —    |   |
| RhF <sub>2</sub>  | PXX                       | —                 | $Cmnm(65)$        | —     | —                  | —     | —              | —     | —     | 1.206          | 4.004             | 0.0               | —           | —    |   |
| Rh <sub>2</sub>   | THX                       | $P3m1(164)$       | —                 | 8.07  | 8.07               | 60.0  | —              | —     | —     | 15.14          | 15.34             | —                 | —           | 4.0  |   |
| PdF <sub>2</sub>  | PTH                       | $C2/m(12)$        | $P2_1/c(14)$      | 6.83  | 6.84               | 59.9  | 60.0           | 48.8  | 48.8  | 0.004          | 2.418             | 3.5               | 3.5         | —    |   |
| PdCl <sub>2</sub> | HTX                       | $Cmnm(65)$        | —                 | 7.48  | 7.48               | 59.9  | —              | —     | —     | 6.98           | 6.98              | 8.0               | 3.9         | 0.0  |   |
| PdBr <sub>2</sub> | PTH                       | $Cmnm(65)$        | —                 | 7.84  | 7.84               | 59.8  | 8.63           | 49.7  | 47.4  | —              | 0.753             | 3.561             | 8.0         | 0.0  |   |
| Pd <sub>2</sub>   | THP                       | $Cmnm(65)$        | $P\bar{1}(2)$     | 10.07 | 10.07              | 45.5  | 8.96           | 8.96  | 8.96  | 15.26          | 6.63              | 7.9               | 0.0         | 0.0  |   |
| AgF <sub>2</sub>  | HTX                       | $P\bar{1}(2)$     | —                 | 7.74  | 7.75               | 50.8  | 11.61          | 11.31 | 34.2  | 14.21          | 7.29              | 0.0               | 0.0         | 0.0  |   |
| AgCl <sub>2</sub> | THP                       | $Cmnm(65)$        | $Cmnm(65)$        | 8.35  | 8.34               | 52.2  | 8.09           | 8.09  | 54.0  | 12.12          | 12.12             | 3.0               | 2.8         | 0.0  |   |
| Ag <sub>2</sub>   | THP                       | $C2/m(12)$        | $P2/m(10)$        | 9.23  | 9.23               | 50.7  | 9.35           | 9.35  | 50.1  | 10.18          | 14.09             | 0.0               | 0.0         | 0.0  |   |
| HfF <sub>2</sub>  | HTP                       | $P6m2(187)$       | $Pm(6)$           | 6.99  | 6.98               | 50.7  | 6.08           | 6.08  | 59.9  | 5.97           | 7.04              | 0.0               | 0.0         | 0.0  |   |
| HfCl <sub>2</sub> | HTP                       | $P6m2(187)$       | $P2_1/m(11)$      | 6.57  | 6.98               | 61.8  | 6.69           | 6.69  | 60.2  | 6.36           | 6.36              | 0.0               | 0.0         | 0.0  |   |
| HfBr <sub>2</sub> | TPH                       | $P6m2(187)$       | $P2_1/m(11)$      | 6.88  | 7.28               | 61.8  | 6.99           | 6.99  | 60.1  | 7.28           | 7.28              | 0.0               | 0.0         | 0.0  |   |
| Hf <sub>2</sub>   | PTH                       | $P6m2(187)$       | $P2_1/m(11)$      | 7.59  | 7.84               | 59.7  | 7.56           | 7.56  | 59.8  | 7.76           | 7.75              | 0.0               | 0.0         | 0.0  |   |
| TaF <sub>2</sub>  | HXX                       | $Pmnm(59)$        | —                 | —     | —                  | —     | —              | —     | —     | —              | —                 | —                 | —           | —    |   |
| Ta <sub>2</sub>   | HTX                       | $Cm(8)$           | —                 | 7.63  | 7.43               | 61.3  | 6.09           | 6.11  | 52.2  | 4.641          | 8.674             | —                 | 0.0         | —    |   |
| WCl <sub>2</sub>  | HXX                       | $P2/m(10)$        | —                 | 8.60  | 8.60               | 46.7  | —              | —     | —     | 10.252         | 10.470            | 0.0               | 0.0         | —    |   |

(Continued on next page)

Table 80: List of TM-XVII

| species           | initial structure indices | space group       |            |            | lattice parameters |       |       |                |       |       | relative energy |                |                   | spin moment       |        |      |      |      |
|-------------------|---------------------------|-------------------|------------|------------|--------------------|-------|-------|----------------|-------|-------|-----------------|----------------|-------------------|-------------------|--------|------|------|------|
|                   |                           | T                 | H          | P          | a [Å]              | b [Å] | c [Å] | $\gamma$ [deg] | a [Å] | b [Å] | c [Å]           | $\gamma$ [deg] | $\Delta E_1$ [eV] | $\Delta E_2$ [eV] | T      | H    | P    |      |
|                   |                           | $C2/m(12)$        | $Cmmm(65)$ | $C2/m(12)$ | 9.46               | 9.46  | 47.9  | 8.60           | 8.57  | 53.1  | 7.67            | 14.49          | 74.5              | 0.039             | 0.356  | 15.9 | 15.9 | 15.9 |
| WBr <sub>2</sub>  | HTP                       | $C2/m(12)$        | $Cmmm(65)$ | $C2/m(12)$ | 9.46               | 9.46  | 47.9  | 8.60           | 8.57  | 53.1  | 7.67            | 14.49          | 74.5              | 0.039             | 0.356  | 15.9 | 15.9 | 15.9 |
| Wl <sub>2</sub>   | HXX                       | —                 | $P1(2)$    | —          | —                  | —     | —     | 11.12          | 10.24 | 35.6  | —               | —              | —                 | 7.959             | 9.436  | —    | 0.0  | —    |
| OsF <sub>2</sub>  | HXX                       | —                 | $P2/c(13)$ | —          | —                  | —     | —     | 5.58           | 6.86  | 48.1  | —               | —              | —                 | 2.329             | 12.030 | —    | 0.0  | —    |
| OsBr <sub>2</sub> | HTX                       | $P\bar{3}m1(164)$ | $Cm(8)$    | —          | 7.70               | 7.70  | 60.0  | 7.15           | 7.16  | 55.5  | —               | —              | —                 | 0.714             | 5.472  | 0.0  | 0.0  | —    |
| OsI <sub>2</sub>  | TXX                       | $P3m1(164)$       | —          | —          | 8.13               | 8.13  | 60.1  | —              | —     | —     | —               | —              | —                 | 2.659             | 5.434  | 0.0  | —    | —    |
| IrF <sub>2</sub>  | HTP                       | $Pmma(51)$        | $Pmnm(47)$ | $Pbcm(57)$ | 6.24               | 6.23  | 62.0  | 8.41           | 6.40  | 39.9  | 9.04            | 7.26           | 36.1              | 0.084             | 0.743  | 0.0  | 0.0  | 0.0  |
| IrBr <sub>2</sub> | HXX                       | —                 | $Cmnm(65)$ | —          | —                  | —     | —     | 7.41           | 9.03  | 52.7  | —               | —              | —                 | 1.219             | 1.663  | 0.0  | 0.0  | —    |
| IrI <sub>2</sub>  | TXX                       | $P\bar{3}m1(164)$ | —          | —          | 8.10               | 8.10  | 59.8  | —              | —     | —     | —               | —              | —                 | 1.852             | 2.785  | 0.0  | —    | —    |
| PtF <sub>2</sub>  | HXX                       | —                 | $Pmnm(47)$ | —          | —                  | —     | —     | 8.83           | 6.67  | 39.2  | —               | —              | —                 | 0.865             | 3.365  | —    | 2.4  | —    |
| PtCl <sub>2</sub> | PTH                       | $P1(1)$           | $Cmnm(65)$ | $Pmna(53)$ | 10.87              | 10.48 | 36.1  | 8.74           | 8.63  | 47.1  | 7.80            | 7.82           | 68.6              | 0.189             | 0.364  | 0.0  | 0.0  | 0.0  |
| PtI <sub>2</sub>  | THX                       | $C2/m(12)$        | $Cmnm(65)$ | —          | 10.27              | 10.31 | 44.7  | 9.81           | 9.74  | 47.3  | —               | —              | —                 | 0.019             | 2.617  | 0.0  | 0.0  | —    |
| AuCl <sub>2</sub> | THP                       | $C2/m(12)$        | $Cmnm(65)$ | $P2/m(10)$ | 9.06               | 9.08  | 47.6  | 8.19           | 8.16  | 53.3  | 14.73           | 7.34           | 64.9              | 0.056             | 0.313  | 3.2  | 3.1  | 0.0  |
| AuBr <sub>2</sub> | THX                       | $C2/m(12)$        | $Cmnm(65)$ | —          | 9.13               | 9.14  | 49.1  | 8.48           | 8.48  | 53.4  | —               | —              | —                 | 0.020             | 0.853  | 0.0  | 0.0  | —    |
| AuI <sub>2</sub>  | THX                       | $C2/m(12)$        | $Cmnm(65)$ | —          | 9.66               | 9.68  | 48.9  | 9.12           | 9.12  | 52.3  | —               | —              | —                 | 0.111             | 0.875  | 0.0  | 0.0  | —    |

Table 81: List of TM-TM

| species | Initial structure indices | space group |               |   | lattice parameters |       |       |                |       |       | relative energy |                | spin moment       |                   |      |     |     |
|---------|---------------------------|-------------|---------------|---|--------------------|-------|-------|----------------|-------|-------|-----------------|----------------|-------------------|-------------------|------|-----|-----|
|         |                           | T           | H             | P | a [Å]              | b [Å] | c [Å] | $\gamma$ [deg] | a [Å] | b [Å] | c [Å]           | $\gamma$ [deg] | $\Delta E_1$ [eV] | $\Delta E_2$ [eV] | T    | H   | P   |
| ScSc2   | HXX                       | -           | $P4/mmm(123)$ | - | 6.56               | 9.28  | 45.0  | -              | -     | -     | -               | 5.445          | 12.533            | -                 | 0.0  | -   | -   |
| ScCr2   | HXX                       | -           | $Cmmm(65)$    | - | 6.02               | 9.89  | 34.7  | -              | -     | -     | -               | 5.287          | 8.769             | -                 | 32.2 | -   | -   |
| ScTe2   | HXX                       | -           | $P2/c(13)$    | - | 7.27               | 10.03 | 35.5  | -              | -     | -     | -               | 2.727          | 8.818             | -                 | 0.0  | -   | -   |
| ScAg2   | HTX                       | -           | $P4/mmm(123)$ | - | 6.11               | 8.71  | 44.6  | -              | -     | -     | -               | 0.005          | 6.321             | 0.0               | 0.0  | -   | -   |
| ScPt2   | HTX                       | -           | $Cmme(67)$    | - | 8.24               | 10.28 | 29.8  | -              | -     | -     | -               | 0.742          | 6.458             | 0.0               | 0.0  | -   | -   |
| ScAu2   | HTX                       | -           | $C2/m(12)$    | - | 8.12               | 6.79  | 51.1  | -              | -     | -     | -               | 0.019          | 4.427             | 0.0               | 0.0  | -   | -   |
| THf2    | PHX                       | -           | $P4/mmm(123)$ | - | 6.01               | 8.51  | 45.0  | -              | -     | -     | -               | 0.179          | 6.492             | -                 | 0.0  | 0.0 | 0.0 |
| VSc2    | PXX                       | -           | $P4/mmm(123)$ | - | 5.89               | 8.37  | 44.3  | -              | -     | -     | -               | 0.966          | 1.508             | -                 | 0.0  | -   | -   |
| VTi2    | THX                       | -           | $P4/mmm(123)$ | - | 5.88               | 8.31  | 44.9  | -              | -     | -     | -               | 0.228          | 4.235             | 0.0               | 0.0  | -   | -   |
| VV2     | HXX                       | -           | $Cmmm(65)$    | - | 8.01               | 5.10  | 35.3  | -              | -     | -     | -               | 6.097          | 19.320            | -                 | 0.0  | -   | -   |
| VMn2    | HTX                       | -           | $P4/mmm(123)$ | - | 5.79               | 8.22  | 44.9  | -              | -     | -     | -               | 0.023          | 16.527            | 21.1              | 21.1 | -   | -   |
| VY2     | PTH                       | -           | $P4/mmm(123)$ | - | 9.96               | 7.04  | 44.8  | -              | -     | -     | -               | 0.366          | 0.558             | 9.8               | 6.2  | 0.0 | 0.0 |
| VZr2    | TPH                       | -           | $P4/mmm(123)$ | - | 6.31               | 8.91  | 45.0  | -              | -     | -     | -               | 0.001          | 0.004             | 0.0               | 0.0  | 0.0 | 0.0 |
| CrSe2   | PHT                       | -           | $P4/mmm(123)$ | - | 6.42               | 9.09  | 45.0  | -              | -     | -     | -               | 0.209          | 0.213             | 7.0               | 7.0  | 0.0 | 0.0 |
| CrMn2   | HXX                       | -           | $P4/mmm(123)$ | - | 8.00               | 5.65  | 44.9  | -              | -     | -     | -               | 11.904         | 16.133            | -                 | 23.7 | -   | -   |
| CrY2    | HTP                       | -           | $C2/m(12)$    | - | 8.81               | 6.98  | 53.0  | -              | -     | -     | -               | 0.498          | 0.712             | 7.6               | 6.1  | 7.8 | -   |
| CrZr2   | PHT                       | -           | $P4/mmm(123)$ | - | 8.68               | 6.38  | 45.3  | -              | -     | -     | -               | 0.094          | 0.119             | 0.0               | 0.0  | 0.0 | 0.0 |
| CrRu2   | HXX                       | -           | $C2/m(12)$    | - | 6.88               | 7.84  | 41.6  | -              | -     | -     | -               | 1.187          | 5.058             | -                 | 0.0  | -   | -   |
| CrHf2   | HXX                       | -           | $P4/mmm(123)$ | - | 6.24               | 8.82  | 45.0  | -              | -     | -     | -               | 2.721          | 5.543             | -                 | 0.0  | -   | -   |
| MnSc2   | PHT                       | -           | $P4/mmm(123)$ | - | 6.56               | 8.25  | 53.2  | -              | -     | -     | -               | 0.107          | 0.154             | 5.8               | 0.0  | 5.1 | -   |
| MnCr2   | HXX                       | -           | $P4/mmm(123)$ | - | 5.00               | 7.11  | 45.0  | -              | -     | -     | -               | 16.040         | 17.407            | -                 | 8.2  | -   | -   |
| MnMn2   | HXX                       | -           | $P4/mmm(123)$ | - | 5.56               | 7.87  | 45.0  | -              | -     | -     | -               | 9.663          | 13.770            | -                 | 27.3 | -   | -   |
| MnZr2   | THP                       | -           | $P4/mmm(123)$ | - | 6.24               | 8.82  | 45.1  | -              | -     | -     | -               | 0.015          | 0.188             | 0.0               | 0.0  | 0.0 | 0.0 |
| MnOs2   | HXX                       | -           | $P4/mmm(123)$ | - | 7.02               | 8.72  | 36.5  | -              | -     | -     | -               | 5.890          | 6.289             | -                 | 5.9  | -   | -   |
| MnAu2   | HTX                       | -           | $P3m1(164)$   | - | 5.96               | 5.96  | 59.3  | -              | -     | -     | -               | 0.711          | 3.227             | 17.2              | 18.0 | -   | -   |
| FeSe2   | THX                       | -           | $P4/mmm(123)$ | - | 6.20               | 8.77  | 45.1  | -              | -     | -     | -               | 0.002          | 1.286             | 0.0               | 0.0  | -   | -   |
| FeZr2   | PXX                       | -           | $P4/mmm(123)$ | - | 5.54               | 8.18  | 41.8  | -              | -     | -     | -               | 3.152          | 7.289             | -                 | 0.0  | -   | -   |
| FeTe2   | PXX                       | -           | $P4/mmm(123)$ | - | 5.54               | 8.18  | 41.8  | -              | -     | -     | -               | 0.217          | 1.393             | 15.4              | 15.7 | -   | -   |
| FePd2   | HTX                       | -           | $P6m2(187)$   | - | 6.43               | 7.81  | 51.7  | -              | -     | -     | -               | 2.502          | 2.631             | -                 | 0.0  | -   | -   |
| CoZr2   | PXX                       | -           | $P2_1/m(11)$  | - | 8.38               | 8.39  | 35.6  | -              | -     | -     | -               | 0.000          | 2.055             | -                 | 0.0  | -   | -   |
| CoHf2   | TPX                       | -           | $C2/m(12)$    | - | 7.47               | 7.51  | 59.4  | -              | -     | -     | -               | 0.363          | 0.833             | 5.0               | 6.3  | -   | -   |
| CoIr2   | HTX                       | -           | $Am2(38)$     | - | 8.04               | 8.08  | 59.7  | -              | -     | -     | -               | 0.008          | 0.030             | 0.0               | 0.0  | 0.0 | 0.0 |
| NiSe2   | HPT                       | -           | $P6m2(187)$   | - | 6.43               | 8.31  | 54.4  | -              | -     | -     | -               | 0.023          | 1.233             | 0.0               | 0.0  | -   | -   |
| NY2     | TPX                       | -           | $P3m1(164)$   | - | 8.49               | 8.49  | 34.7  | -              | -     | -     | -               | 3.582          | 4.649             | -                 | 0.0  | -   | -   |
| NiHf2   | PTX                       | -           | $C2/m(12)$    | - | 8.49               | 8.49  | 34.7  | -              | -     | -     | -               | 0.007          | 2.366             | 0.0               | 0.0  | -   | -   |
| NiIr2   | HPT                       | -           | $Am2(38)$     | - | 11.03              | 9.78  | 27.6  | -              | -     | -     | -               | 2.361          | 6.522             | -                 | 0.0  | -   | -   |
| YY2     | PXX                       | -           | $Cmme(67)$    | - | 11.03              | 9.78  | 27.6  | -              | -     | -     | -               | 7.350          | 13.581            | -                 | 29.3 | -   | -   |
| YZr2    | HTX                       | -           | $P2/c(13)$    | - | 10.55              | 8.26  | 31.9  | -              | -     | -     | -               | 0.765          | 14.293            | 0.0               | 0.0  | -   | -   |
| ZrTi2   | HXX                       | -           | $Cmmm(65)$    | - | 8.79               | 6.31  | 42.6  | -              | -     | -     | -               | 0.238          | 0.516             | 0.0               | 0.0  | 0.0 | 0.0 |
| ZrCr2   | HXX                       | -           | $P2/c(13)$    | - | 8.64               | 6.12  | 45.1  | -              | -     | -     | -               | 0.404          | 3.838             | -                 | 0.0  | 0.0 | 0.0 |
| ZrNb2   | HTX                       | -           | $P4/mmm(123)$ | - | 8.64               | 6.12  | 45.1  | -              | -     | -     | -               | 0.009          | 7.649             | 0.0               | 0.0  | -   | -   |
| ZrPd2   | TPH                       | -           | $C2/m(12)$    | - | 8.44               | 8.19  | 38.4  | -              | -     | -     | -               | 0.861          | 1.278             | -                 | 0.0  | -   | -   |
| ZrHf2   | HPX                       | -           | $P4/mmm(123)$ | - | 8.44               | 8.19  | 38.4  | -              | -     | -     | -               | 0.005          | 3.812             | 0.0               | 0.0  | -   | -   |
| ZrAu2   | PXX                       | -           | $P4/mmm(123)$ | - | 9.02               | 7.79  | 30.2  | -              | -     | -     | -               | 2.016          | 2.038             | 0.0               | 0.0  | -   | -   |
| NbNb2   | HTX                       | -           | $P2/c(13)$    | - | 6.15               | 8.72  | 43.9  | -              | -     | -     | -               | 0.406          | 12.003            | 26.2              | 26.1 | -   | -   |
| NbRu2   | THX                       | -           | $P4/mmm(123)$ | - | 8.44               | 5.97  | 44.9  | -              | -     | -     | -               | 0.460          | 0.934             | -                 | 0.0  | 0.0 | 0.0 |
| MoMn2   | THX                       | -           | $P4/mmm(123)$ | - | 8.15               | 8.89  | 35.1  | -              | -     | -     | -               | 2.445          | 2.569             | -                 | 0.0  | -   | -   |
| MoY2    | PHX                       | -           | $P4/mmm(123)$ | - | 8.44               | 5.97  | 44.9  | -              | -     | -     | -               | 0.042          | 11.865            | 29.7              | 12.6 | -   | -   |
| TcTi2   | PXX                       | -           | $P2/c(13)$    | - | 8.32               | 5.82  | 45.4  | -              | -     | -     | -               | 1.260          | 1.275             | -                 | 0.0  | -   | -   |
| TcV2    | HXX                       | -           | $P4/mmm(123)$ | - | 9.74               | 6.89  | 45.0  | -              | -     | -     | -               | 0.488          | 0.844             | 0.0               | 0.0  | -   | -   |
| TcTa2   | THX                       | -           | $P2/c(13)$    | - | 7.50               | 9.08  | 38.3  | -              | -     | -     | -               | 0.460          | 0.934             | -                 | 0.0  | 0.0 | 0.0 |
| RuSc2   | HPX                       | -           | $P4/mmm(123)$ | - | 6.40               | 9.05  | 45.0  | -              | -     | -     | -               | 0.053          | 1.564             | -                 | 0.0  | 0.0 | 0.0 |
| RuTi2   | HXX                       | -           | $P4/mmm(123)$ | - | 5.93               | 8.40  | 44.6  | -              | -     | -     | -               | 0.919          | 1.873             | -                 | 0.0  | -   | -   |
| RuV2    | THX                       | -           | $C2/m(12)$    | - | 7.53               | 8.24  | 34.8  | -              | -     | -     | -               | 0.353          | 1.832             | 0.0               | 0.0  | -   | -   |
| RuMn2   | HXX                       | -           | $P4/mmm(123)$ | - | 8.41               | 5.93  | 44.4  | -              | -     | -     | -               | 2.015          | 11.563            | -                 | 33.2 | -   | -   |

(Continued on next page)





Table 81: List of TM-TM

| species           | Initial structure |                     |                   | space group         |       |       | lattice parameters |       |       |       |       |       | relative energy |              | spin moment |                       |                       |                       |     |     |
|-------------------|-------------------|---------------------|-------------------|---------------------|-------|-------|--------------------|-------|-------|-------|-------|-------|-----------------|--------------|-------------|-----------------------|-----------------------|-----------------------|-----|-----|
|                   | indices           | T                   | H                 | T                   | H     | P     | T                  |       | H     |       | P     |       | $\Delta E_1$    | $\Delta E_2$ | T           | H                     | P                     |                       |     |     |
|                   |                   |                     |                   |                     | a [Å] | b [Å] | c [Å]              | a [Å] | b [Å] | c [Å] | a [Å] | b [Å] | c [Å]           | [eV]         | [eV]        | [ $\mu_B$ /unit cell] | [ $\mu_B$ /unit cell] | [ $\mu_B$ /unit cell] |     |     |
| AuY <sub>2</sub>  | HPT               | <i>C2/m</i> (12)    | <i>P6m2</i> (187) | <i>C2/m</i> (12)    |       |       | 9.06               | 9.01  | 55.0  | 7.58  | 7.60  | 60.2  | 9.01            | 8.97         | 55.0        | 0.274                 | 0.282                 | 0.0                   | 0.0 | 0.0 |
| AuPd <sub>2</sub> | THX               | <i>C2/m</i> (12)    | <i>Amm2</i> (38)  |                     |       |       | 9.68               | 9.67  | 32.9  | 9.40  | 9.42  | 33.5  |                 |              |             | 0.742                 | 2.001                 | 0.0                   | 0.0 | 0.0 |
| AuAg <sub>2</sub> | PTH               | <i>P6/mmm</i> (191) | <i>Amm2</i> (38)  | <i>P6/mmm</i> (191) |       |       | 9.75               | 9.75  | 59.9  | 9.14  | 9.10  | 35.8  | 9.75            | 9.75         | 59.9        | 0.028                 | 0.460                 | 0.0                   | 0.0 | 0.0 |
| AuIr <sub>2</sub> | PTX               | <i>Pmmm</i> (59)    |                   | <i>Pmmm</i> (59)    |       |       | 8.35               | 8.87  | 57.9  |       |       |       | 8.38            | 8.37         | 63.9        | 0.161                 | 2.445                 | 0.0                   | 0.0 | 0.0 |
