# Supplementary material for: A structure map for AB2 type 2D materials using high-throughput DFT calculations
Source: Royal Society of Chemistry journal article supplement (doi:10.1039/d0ma00999g), 2021-01-01
Supplement: d0ma00999g4.pdf [file d0ma00999g4.pdf]

## Supplemental information 4

Figures of final structures for each initial structures are shown in the following pages. T, H, and P in parentheses represent the types of initial structures.

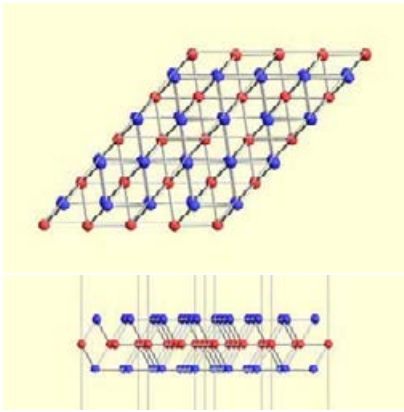

LiLi<sub>2</sub> (T)

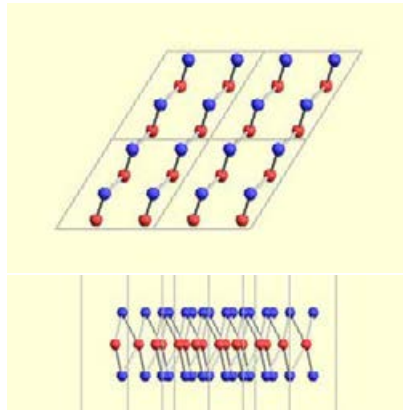

LiLi<sub>2</sub> (H)

×

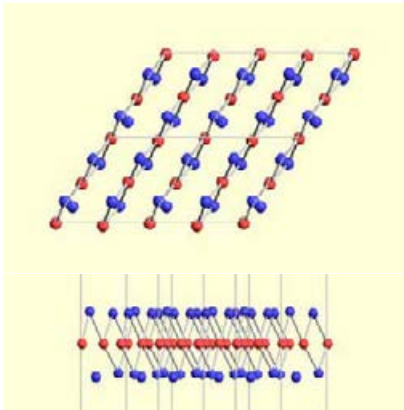

LiMg<sub>2</sub> (T)

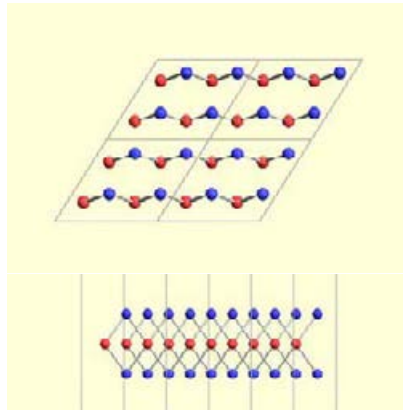

LiMg<sub>2</sub> (H)

×

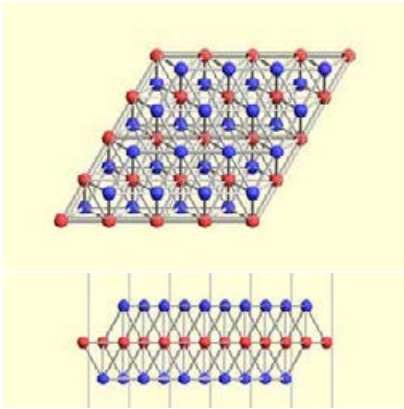

LiAl<sub>2</sub> (T)

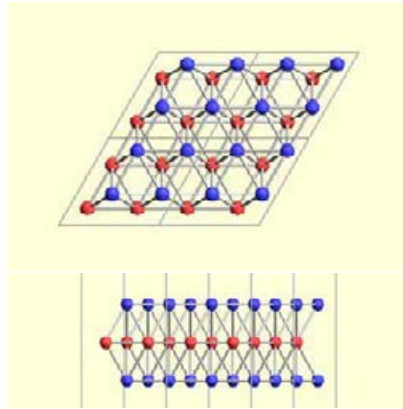

LiAl<sub>2</sub> (H)

×

×

×

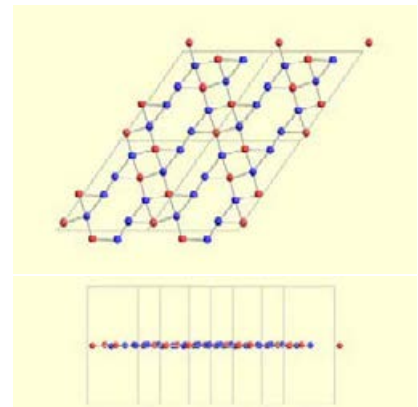

LiCl<sub>2</sub> (P)

×

×

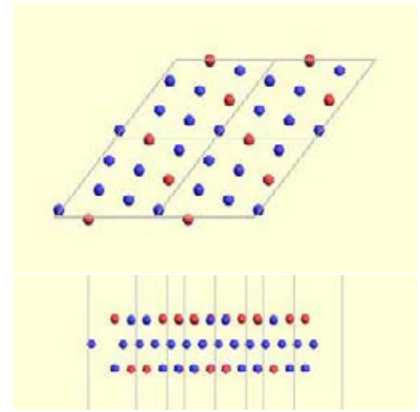

LiSc<sub>2</sub> (P)

×

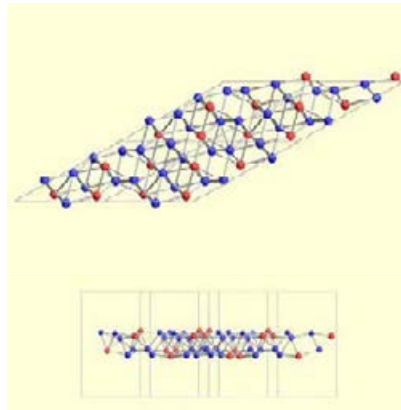

LiMn<sub>2</sub> (H)

×

×

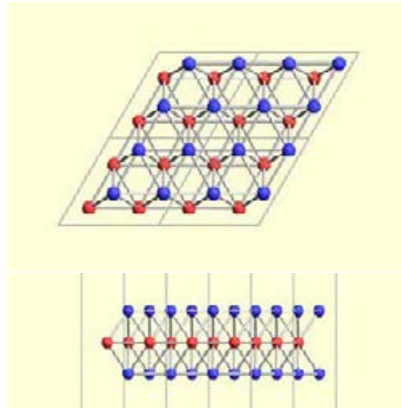

LiAg<sub>2</sub> (H)

×

×

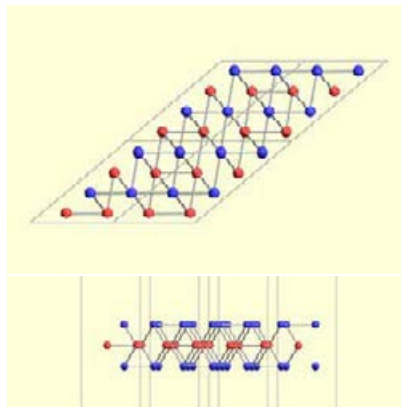

LiCd<sub>2</sub> (H)

×

×

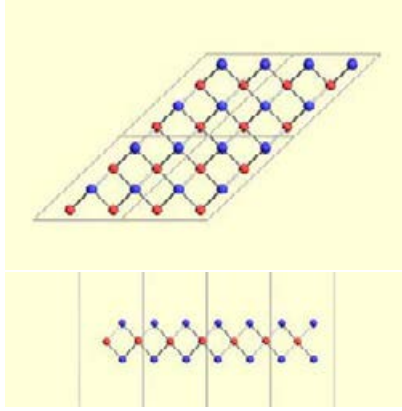

$\text{LiIn}_2$  (H)

×

×

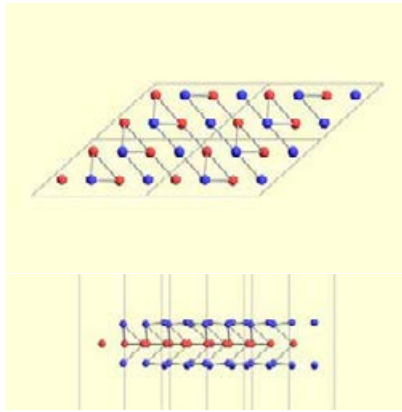

$\text{LiSn}_2$  (H)

×

×

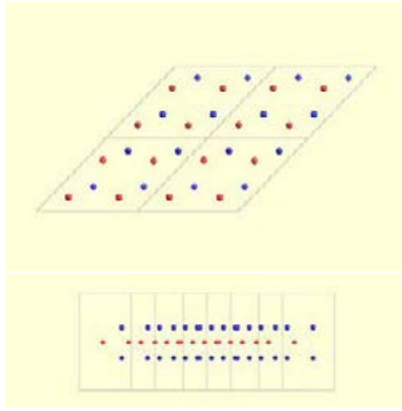

$\text{LiCs}_2$  (H)

×

×

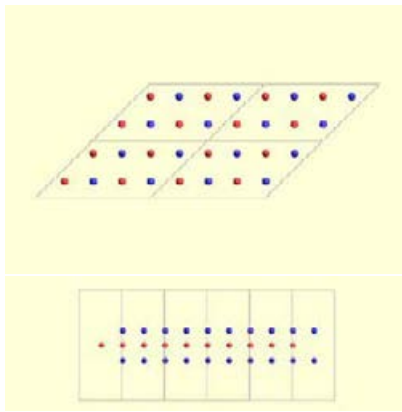

$\text{LiBa}_2$  (H)

×



×

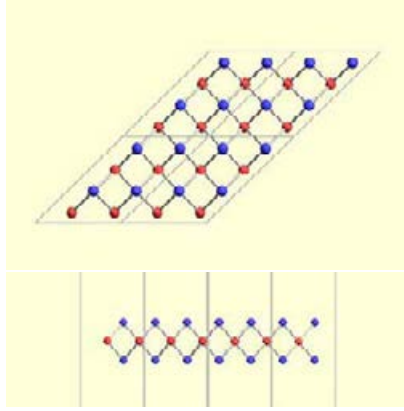

LiHg<sub>2</sub> (H)

×

×

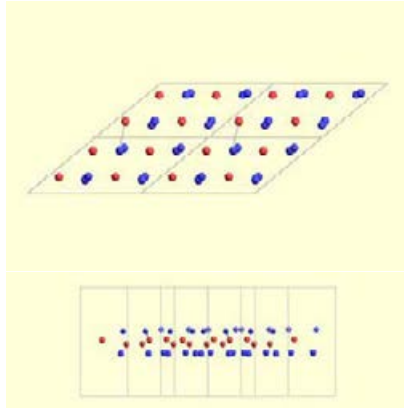

LiBi<sub>2</sub> (H)

×

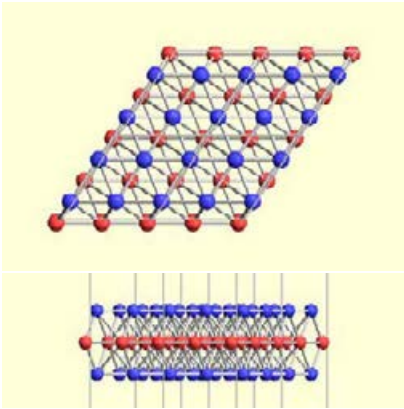

BeBe<sub>2</sub> (T)

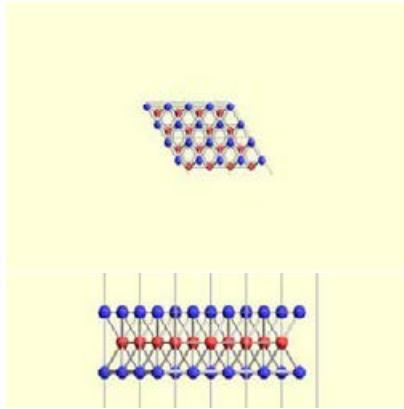

BeBe<sub>2</sub> (H)

×

×

×

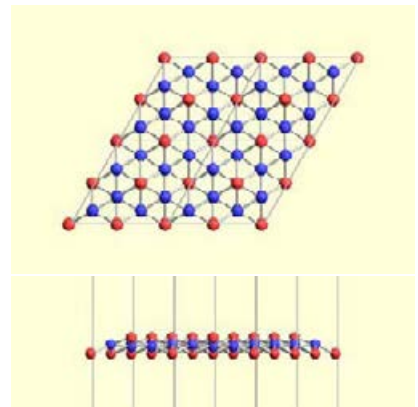

BeB<sub>2</sub> (P)

×

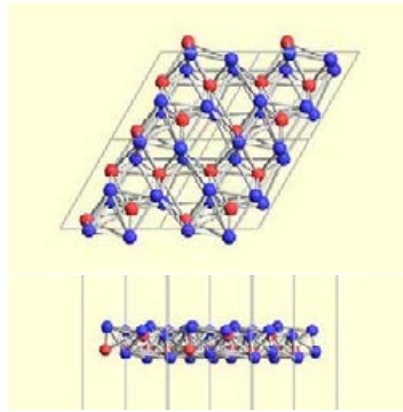

×

BeO<sub>2</sub> (H)

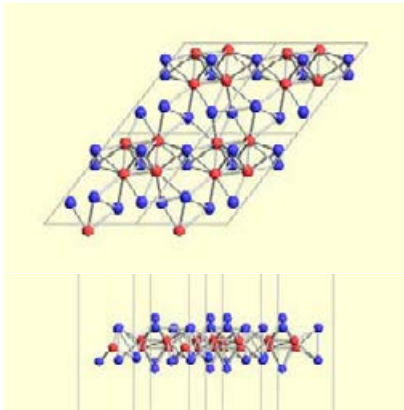

BeMg<sub>2</sub> (T)

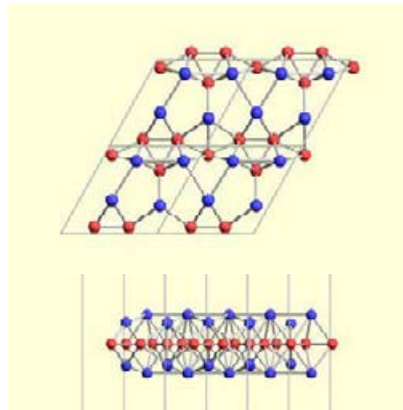

BeMg<sub>2</sub> (H)

×

×

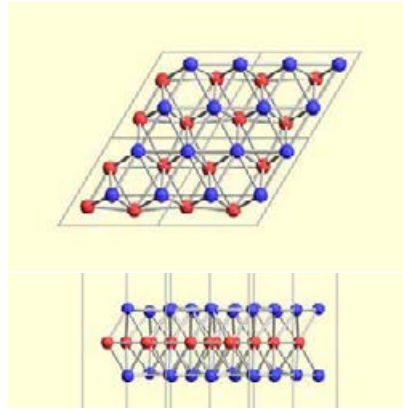

BeAl<sub>2</sub> (H)

×

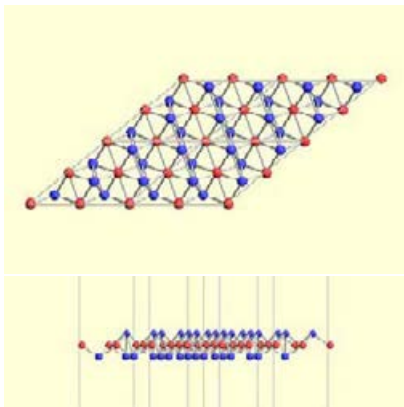

BeSi<sub>2</sub> (T)

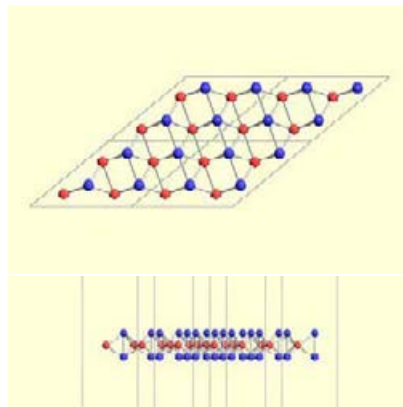

BeSi<sub>2</sub> (H)

×

×

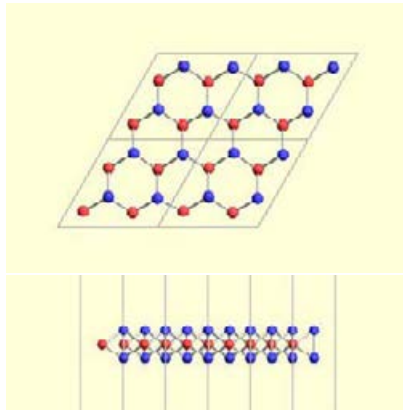

BeP<sub>2</sub> (H)

×

×

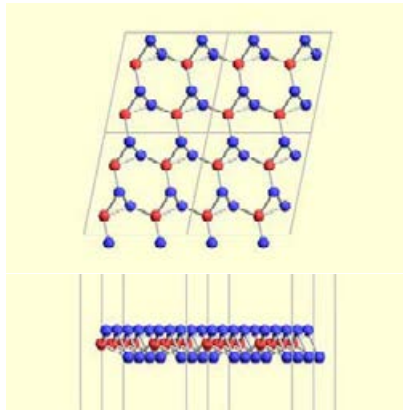

BeS<sub>2</sub> (H)

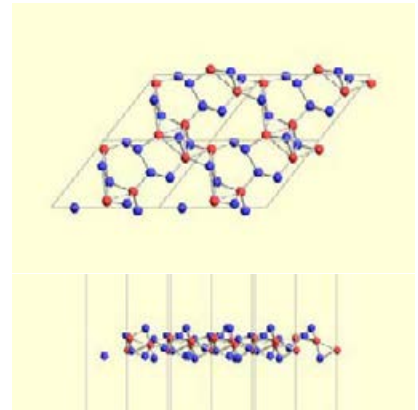

BeS<sub>2</sub> (P)

×

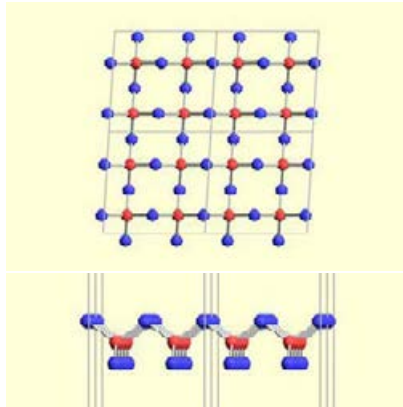

BeCl<sub>2</sub> (H)

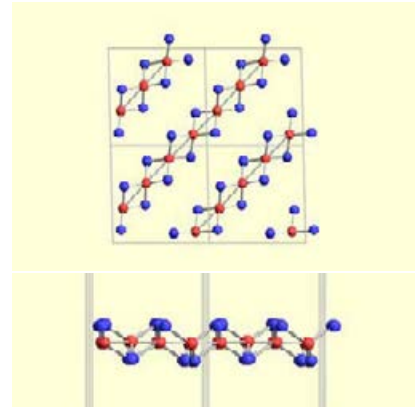

BeCl<sub>2</sub> (P)

×

×

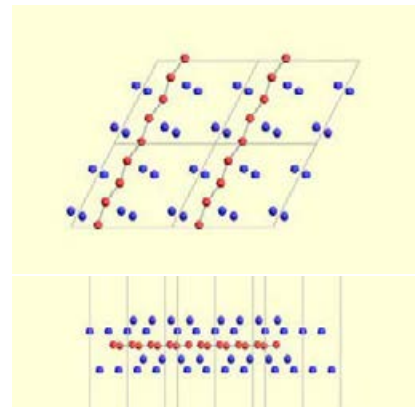

BeK<sub>2</sub> (P)

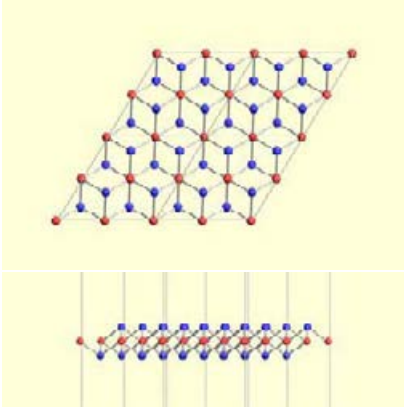

BeCa<sub>2</sub> (T)

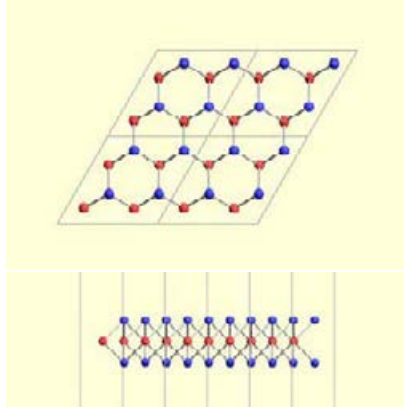

BeCa<sub>2</sub> (H)

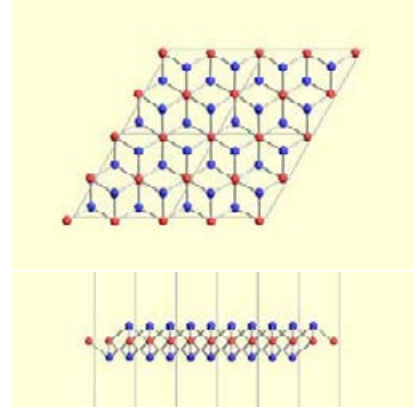

BeCa<sub>2</sub> (P)

×

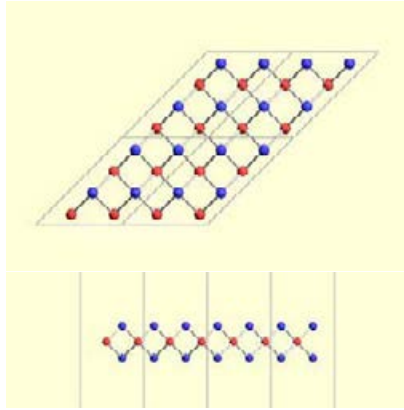

BeSc<sub>2</sub> (H)

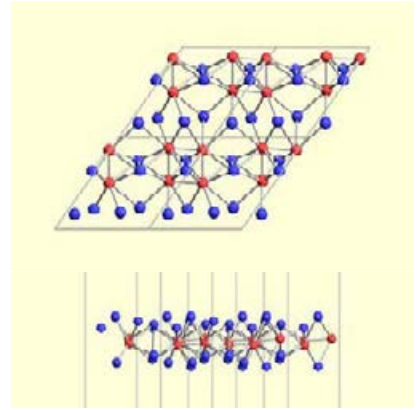

BeSc<sub>2</sub> (P)

×

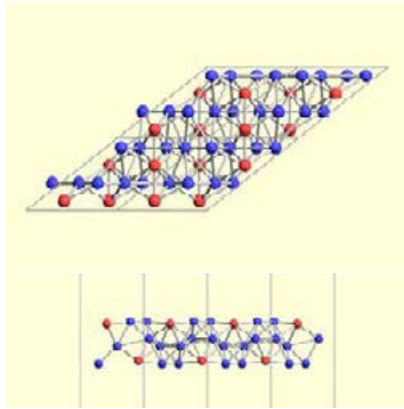

BeV<sub>2</sub> (H)

×

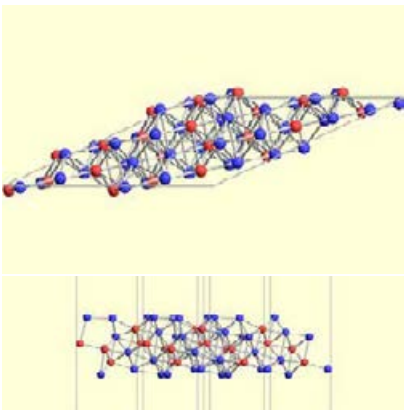

BeCr<sub>2</sub> (T)

×

×

×

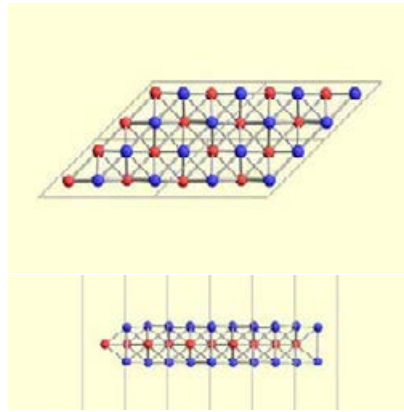

BeMn<sub>2</sub> (H)

×

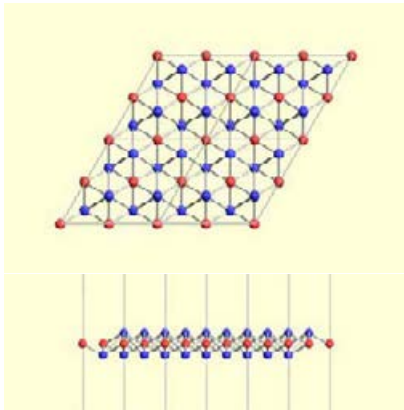

BeGe<sub>2</sub> (T)

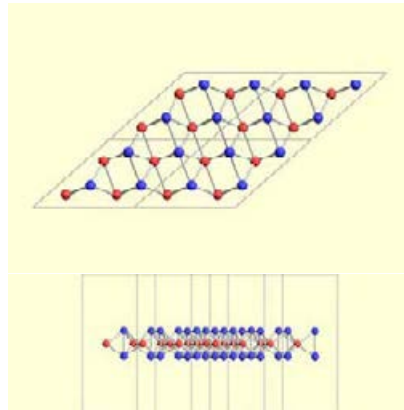

BeGe<sub>2</sub> (H)

×

×

×

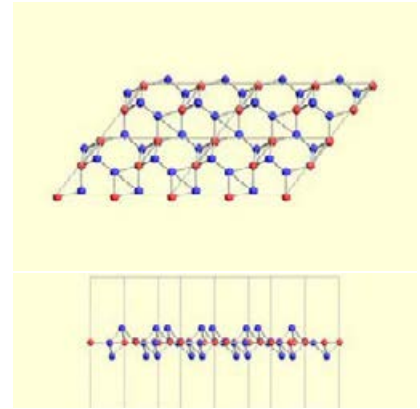

BeSe<sub>2</sub> (P)

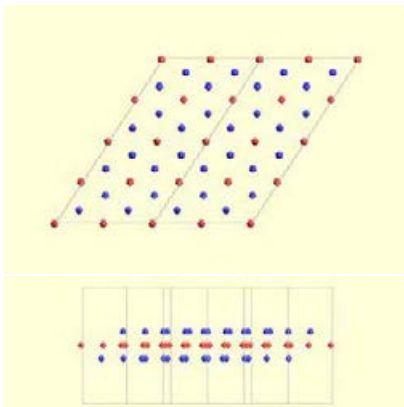

BeRb<sub>2</sub> (T)

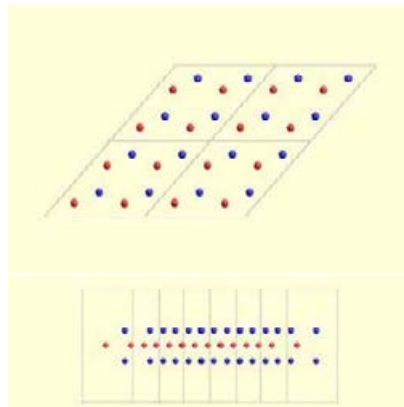

BeRb<sub>2</sub> (H)

×

×

×

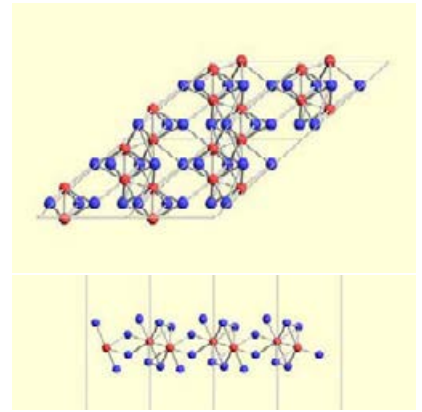

BeZr<sub>2</sub> (P)

×

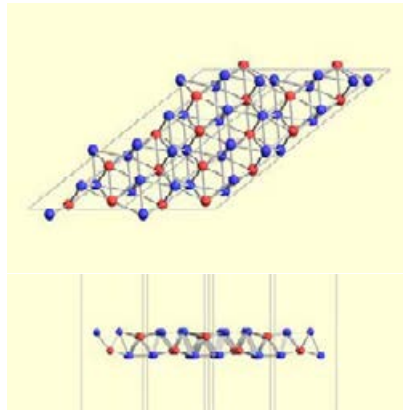

BeMo<sub>2</sub> (H)

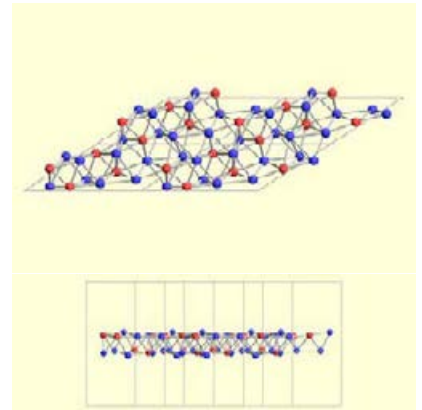

BeMo<sub>2</sub> (P)

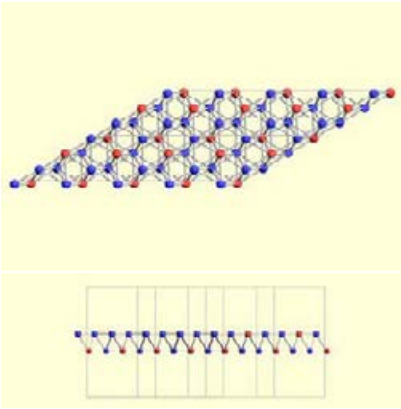

BeRu<sub>2</sub> (T)

×

×

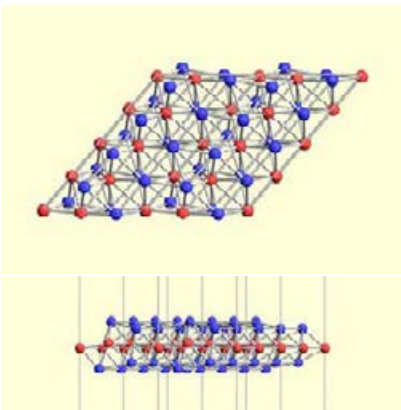

BeRh<sub>2</sub> (T)

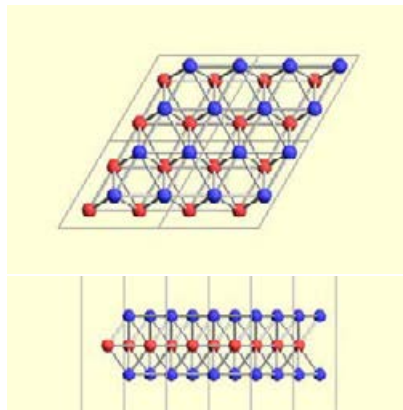

BeRh<sub>2</sub> (H)

×



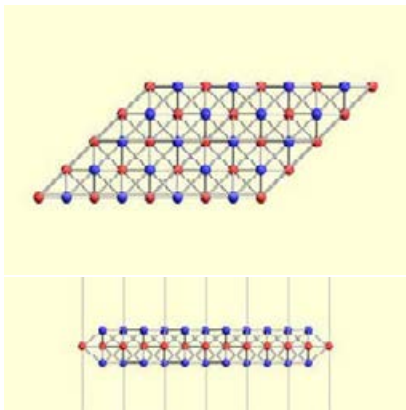

BeAg<sub>2</sub> (T)

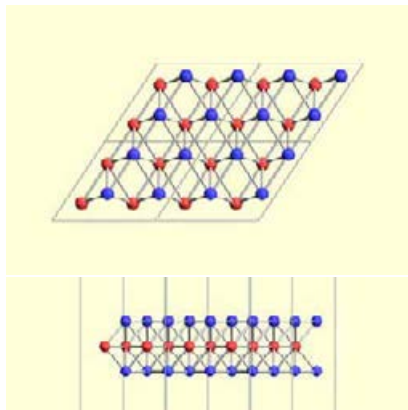

BeAg<sub>2</sub> (H)

×

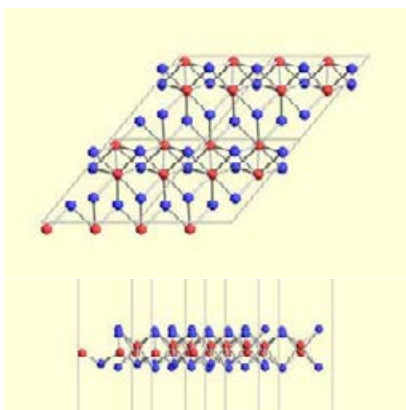

BeIn<sub>2</sub> (T)

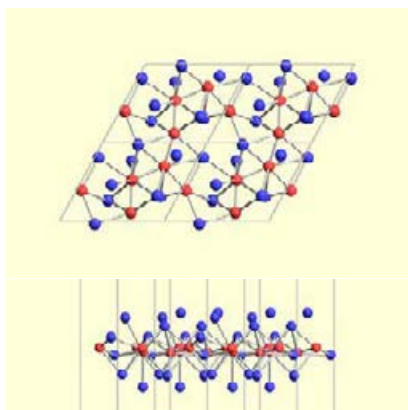

BeIn<sub>2</sub> (H)

×

×

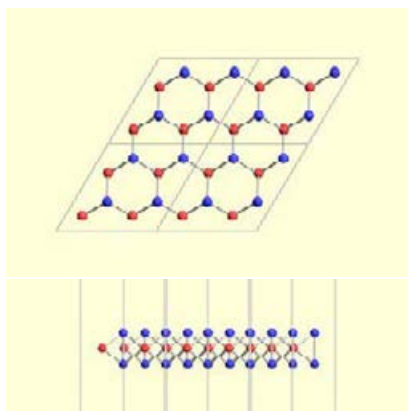

BeSb<sub>2</sub> (H)

×

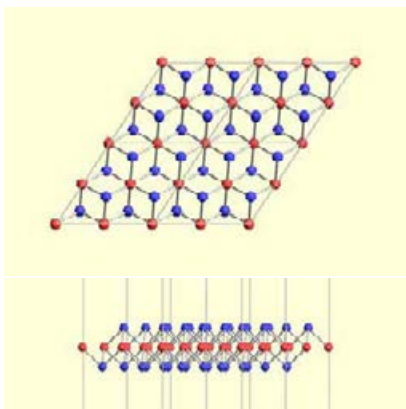

BeTe<sub>2</sub> (T)

×

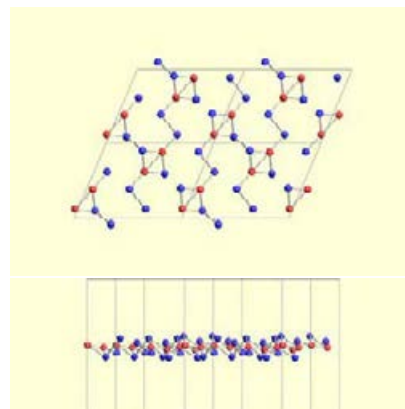

BeTe<sub>2</sub> (P)

×

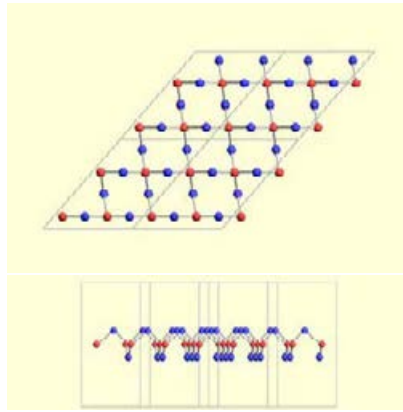

BeI<sub>2</sub> (H)

×

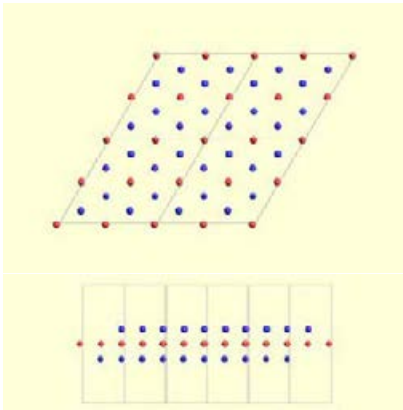

BeCs<sub>2</sub> (T)

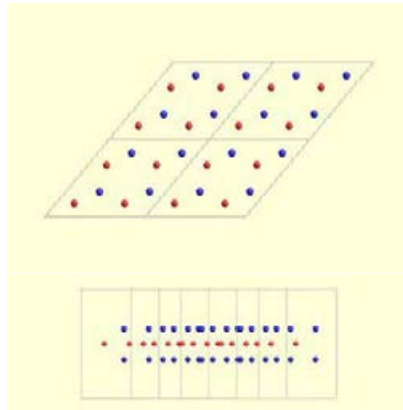

BeCs<sub>2</sub> (H)

×

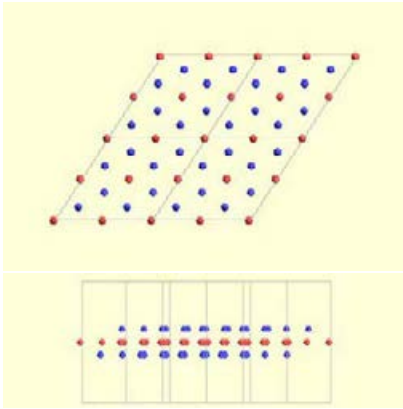

BeBa<sub>2</sub> (T)

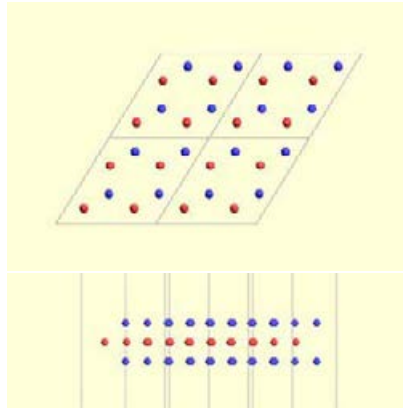

BeBa<sub>2</sub> (H)

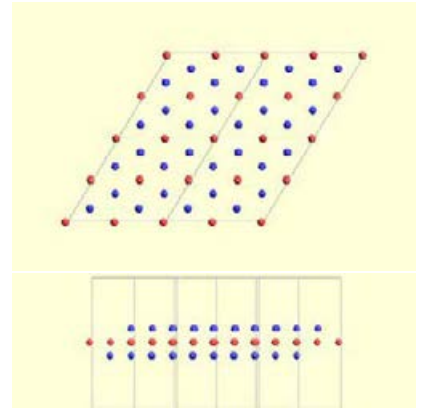

BeBa<sub>2</sub> (P)

×

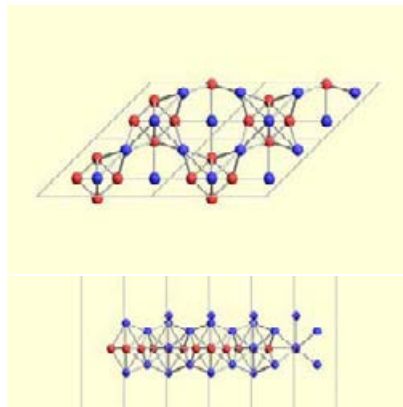

BeHf<sub>2</sub> (H)

×



×

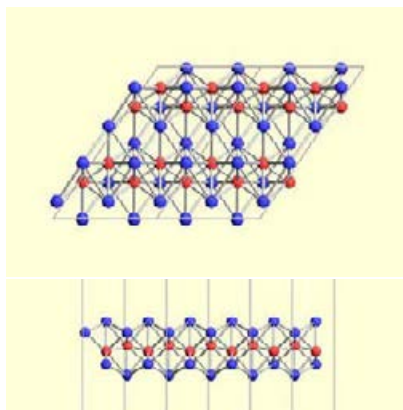

×

BeTa<sub>2</sub> (H)

×

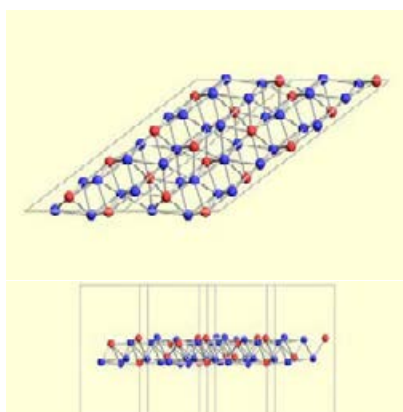

×

BeW<sub>2</sub> (H)

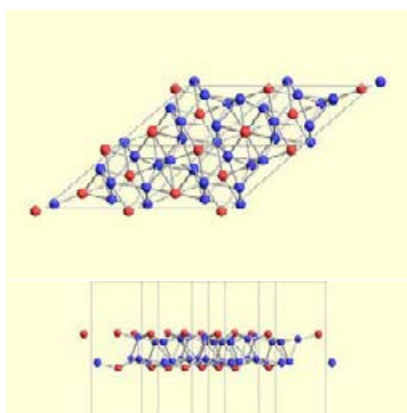

×

×

BeRe<sub>2</sub> (T)

×

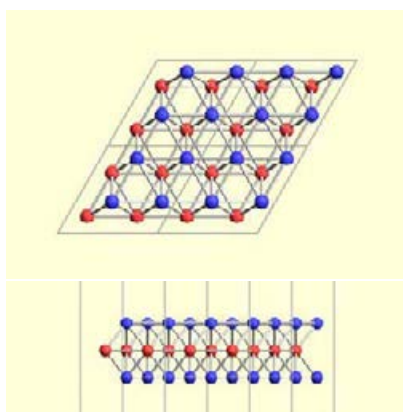

×

BePt<sub>2</sub> (H)

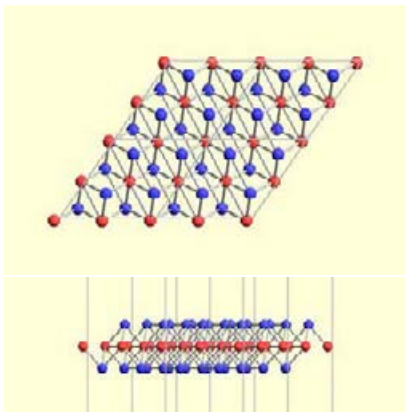

BeAu<sub>2</sub> (T)

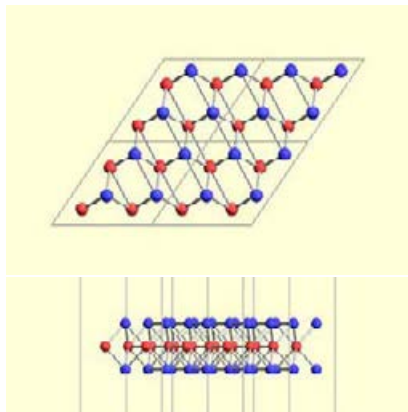

BeAu<sub>2</sub> (H)

×

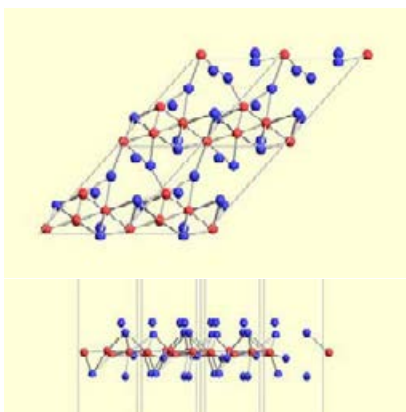

BeTl<sub>2</sub> (T)

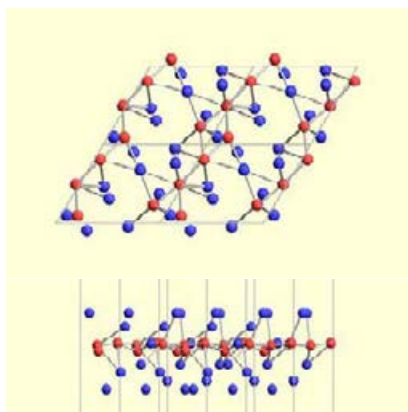

BeTl<sub>2</sub> (H)

×

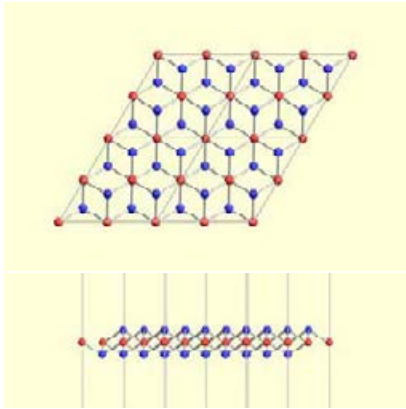

BePb<sub>2</sub> (T)

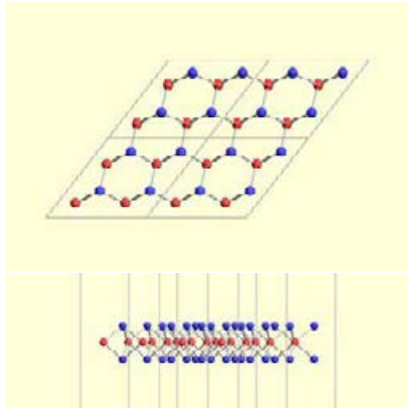

BePb<sub>2</sub> (H)

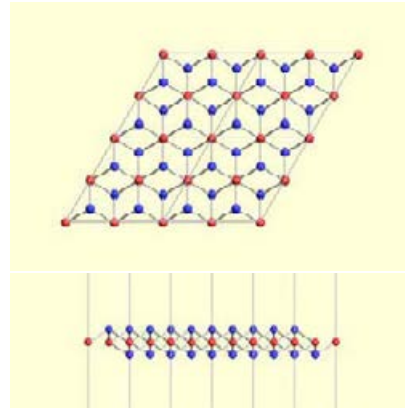

BePb<sub>2</sub> (P)

×

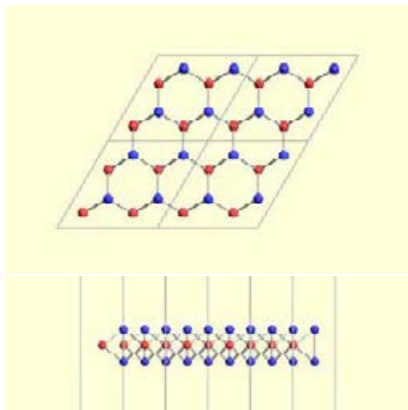

BeBi<sub>2</sub> (H)

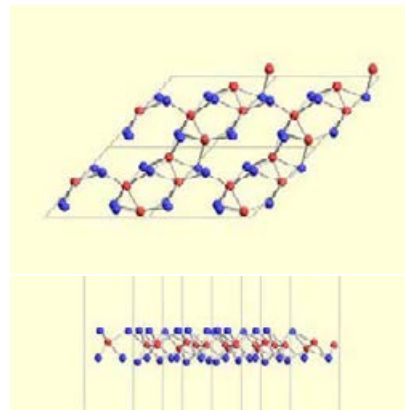

BeBi<sub>2</sub> (P)

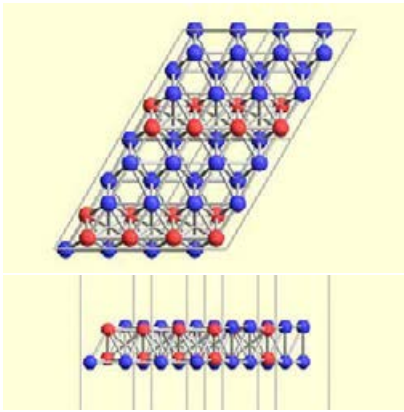

BB<sub>2</sub> (T)

×

×

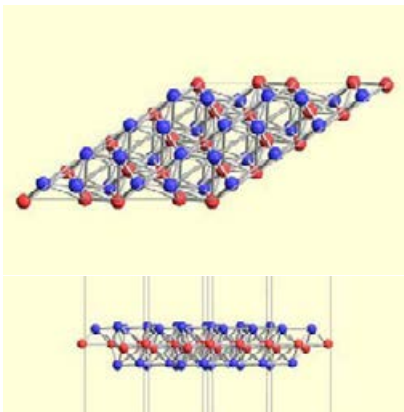

BB<sub>2</sub> (T)

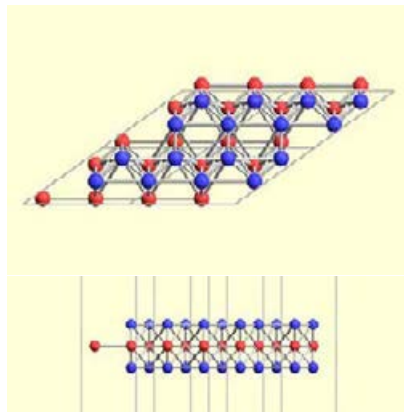

BB<sub>2</sub> (H)

×

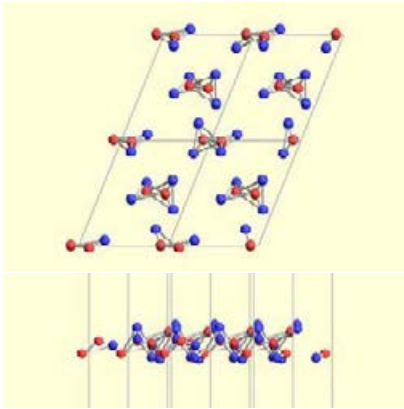

BF<sub>2</sub> (T)

×

×

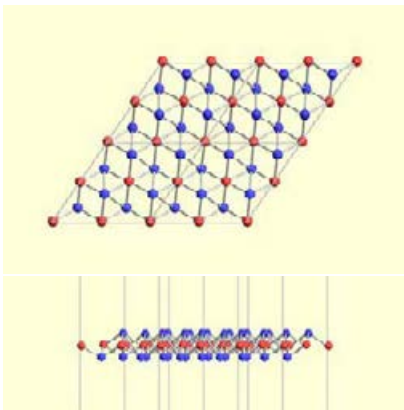

BMg<sub>2</sub> (T)

×

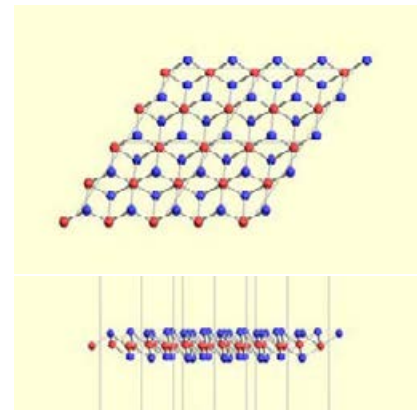

BMg<sub>2</sub> (P)

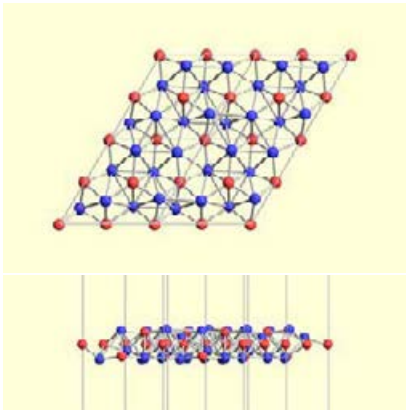

BA<sub>12</sub> (T)

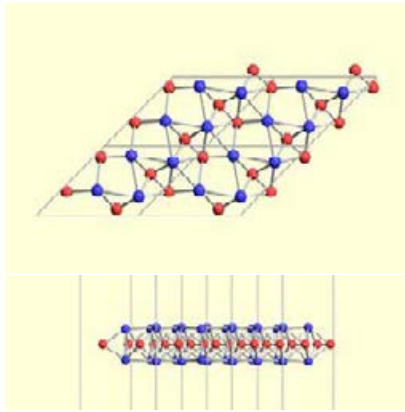

BA<sub>12</sub> (H)

×

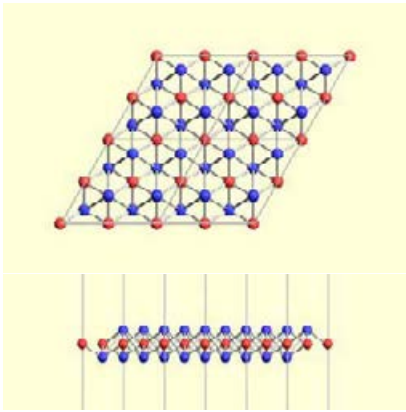

BSi<sub>2</sub> (T)

×

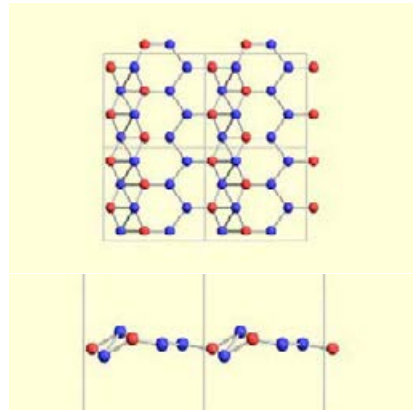

BSi<sub>2</sub> (P)

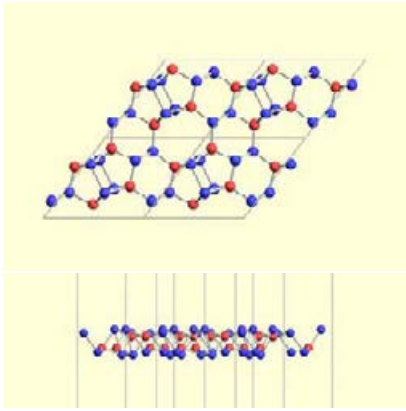

BP<sub>2</sub> (T)

×

×

×

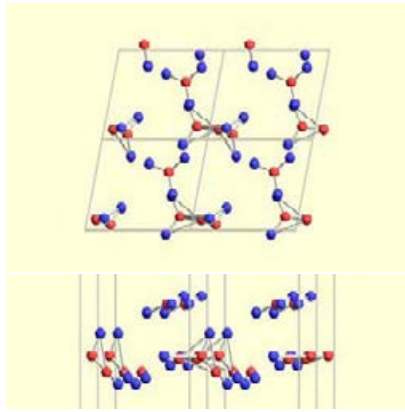

BCl<sub>2</sub> (H)

×

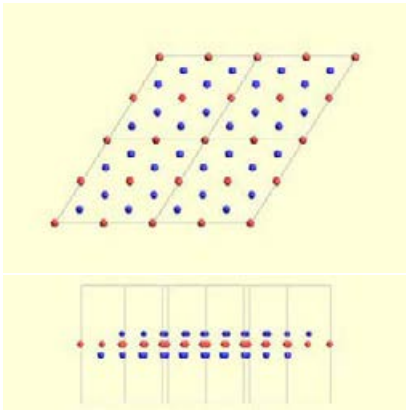

BK<sub>2</sub> (T)

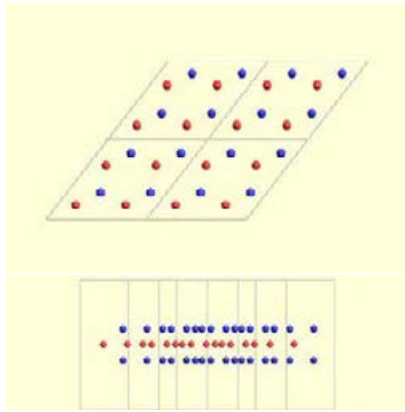

BK<sub>2</sub> (H)

×

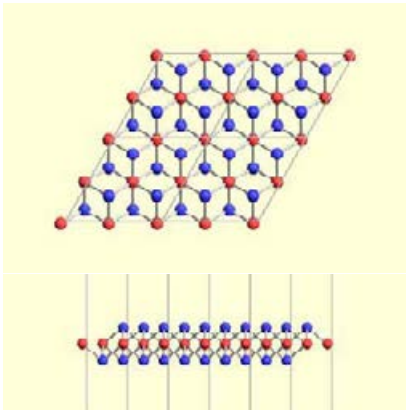

BTi<sub>2</sub> (T)

×

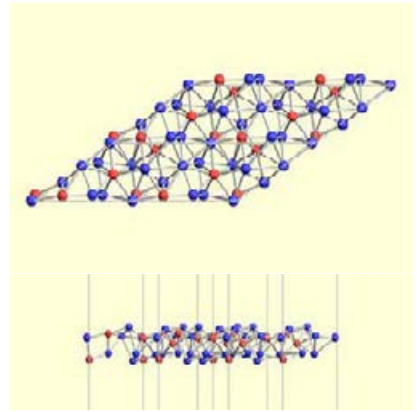

BTi<sub>2</sub> (P)

×

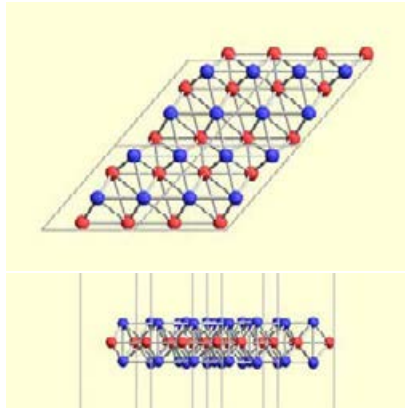

BCr<sub>2</sub> (H)

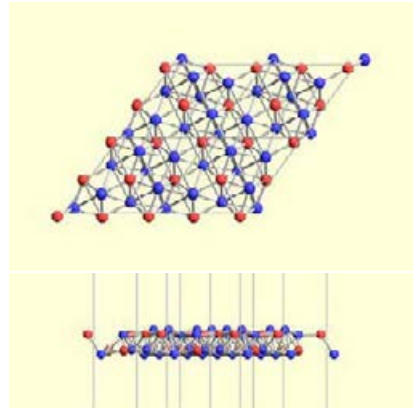

BCr<sub>2</sub> (P)

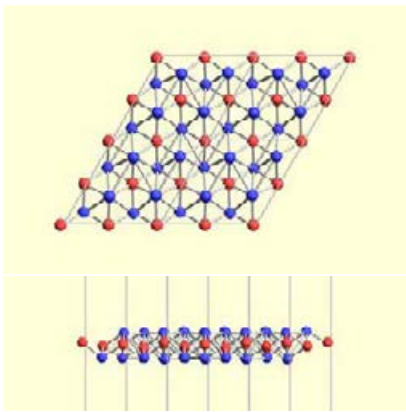

BMn<sub>2</sub> (T)

×

×



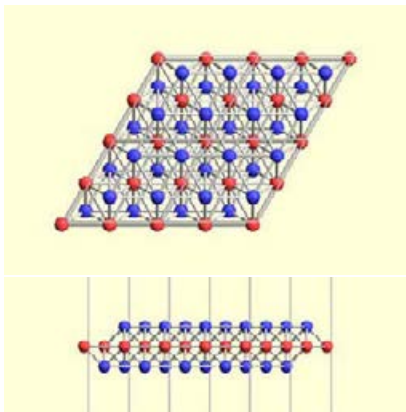

BNi<sub>2</sub> (T)

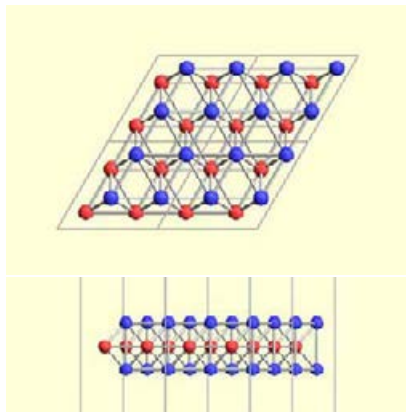

BNi<sub>2</sub> (H)

×

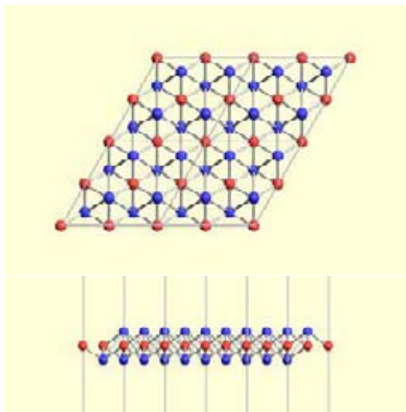

BGe<sub>2</sub> (T)

×

×

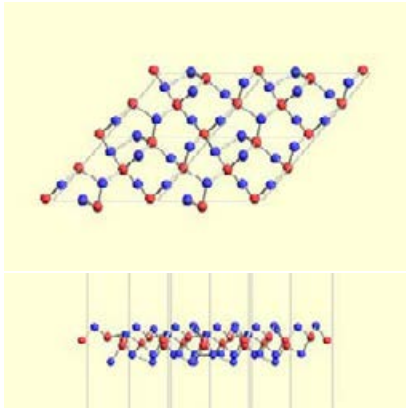

BSe<sub>2</sub> (T)

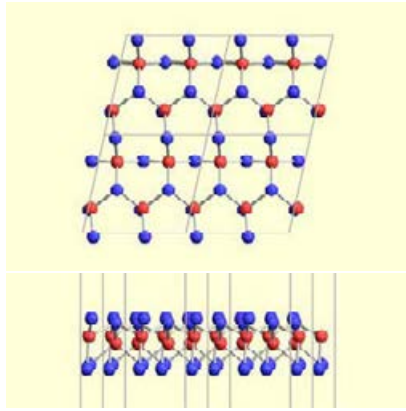

BSe<sub>2</sub> (H)

×

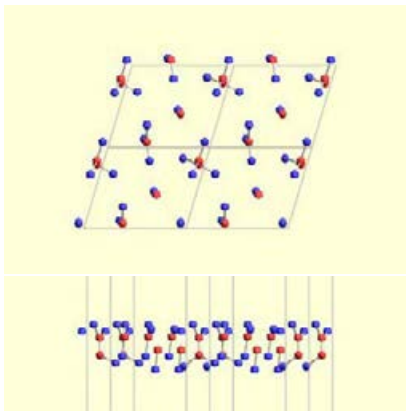

BBr<sub>2</sub> (T)

×

×

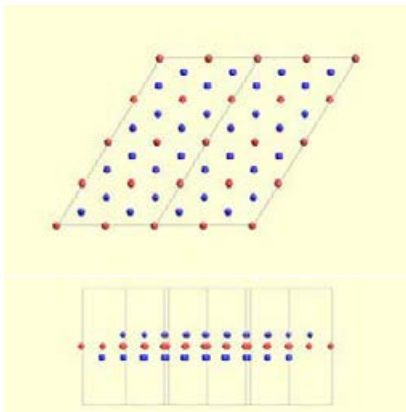

BRb<sub>2</sub> (T)

×

×

×

×

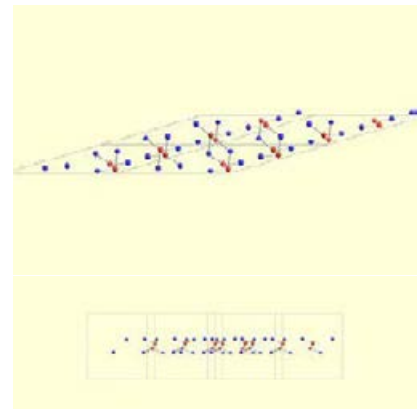

BSr<sub>2</sub> (P)

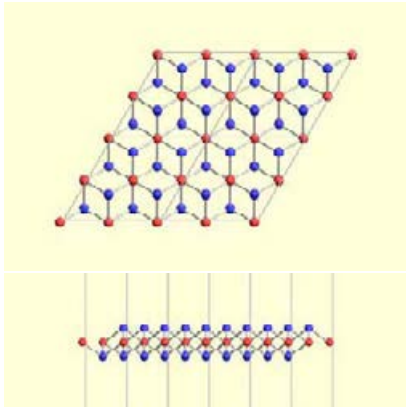

BY<sub>2</sub> (T)

×

×

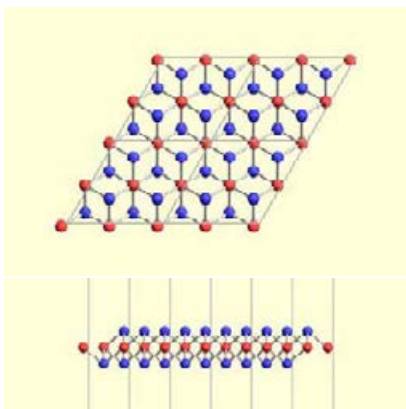

BNb<sub>2</sub> (T)

×

×

×

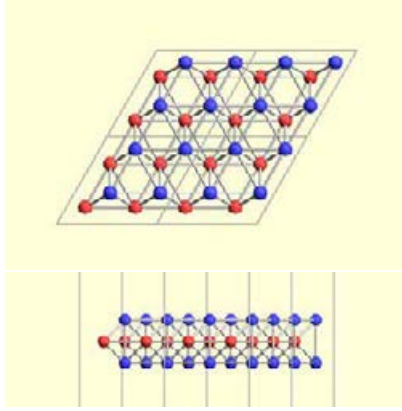

$BRu_2$  (H)

×

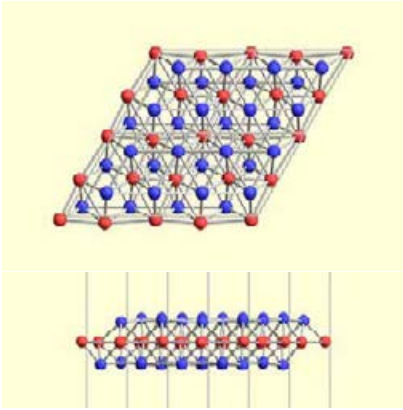

$BRh_2$  (T)

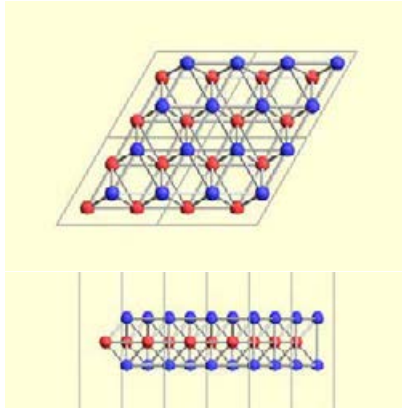

$BRh_2$  (H)

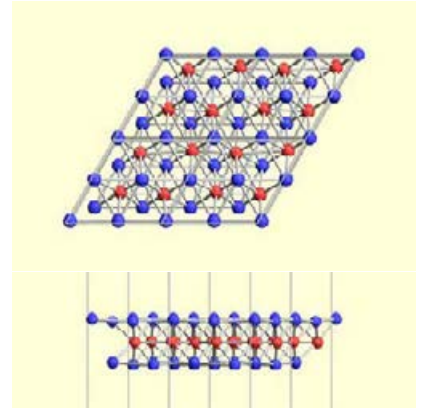

$BRh_2$  (P)

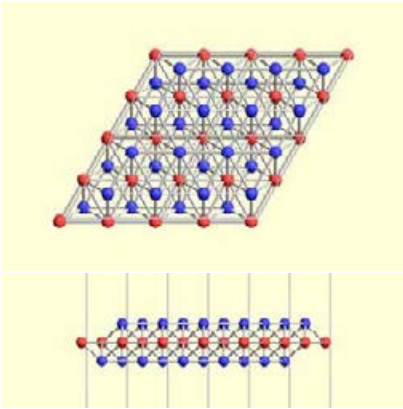

$BPd_2$  (T)

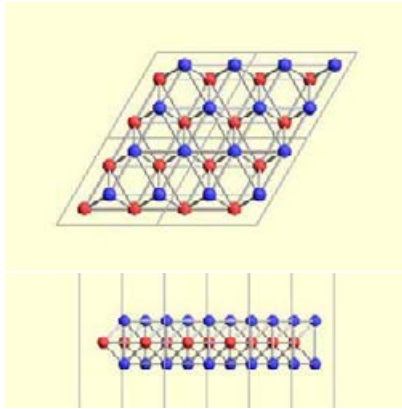

$BPd_2$  (H)

×

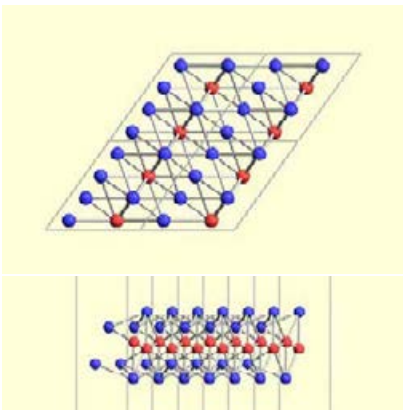

$BAg_2$  (T)

×

×



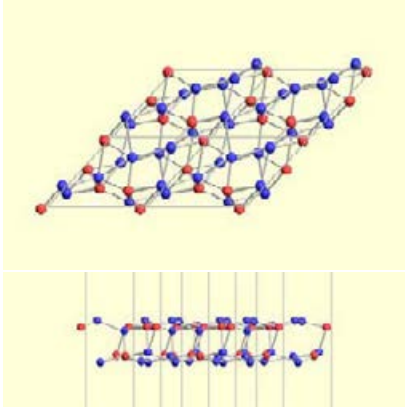

BCd<sub>2</sub> (T)

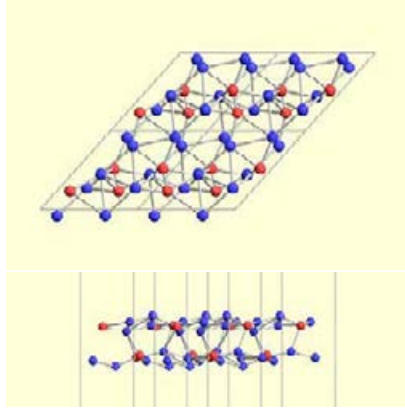

BCd<sub>2</sub> (H)

×

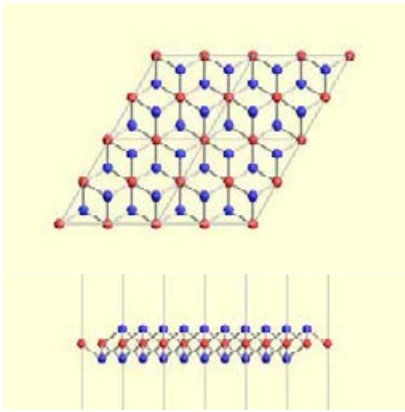

BSn<sub>2</sub> (T)

×

×

×

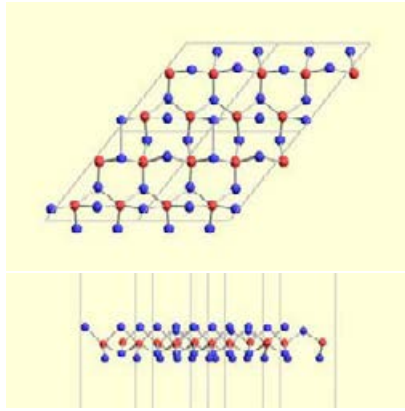

BSb<sub>2</sub> (H)

×

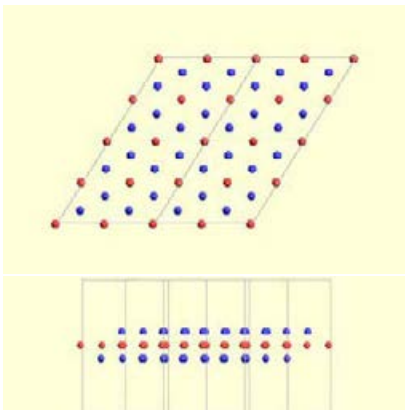

BBa<sub>2</sub> (T)

×

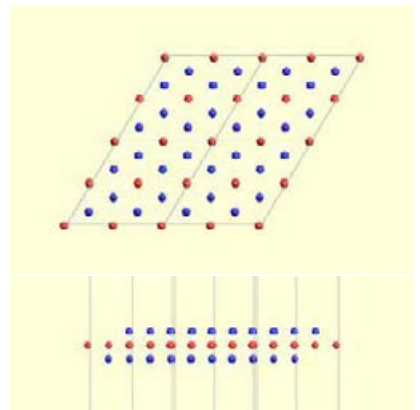

BBa<sub>2</sub> (P)

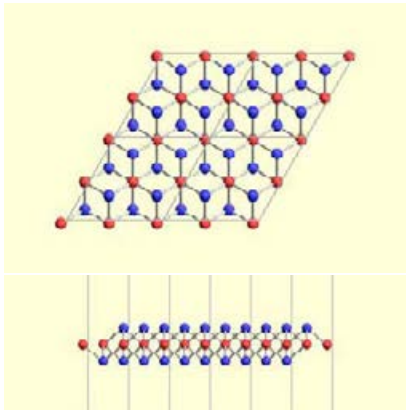

BHf<sub>2</sub> (T)

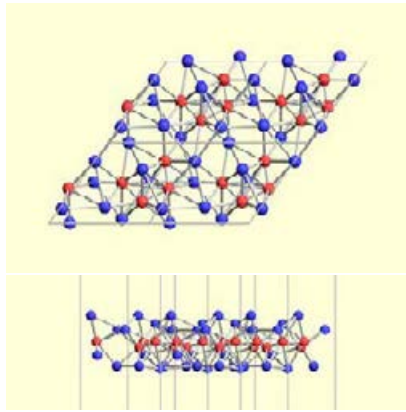

BHf<sub>2</sub> (H)

×

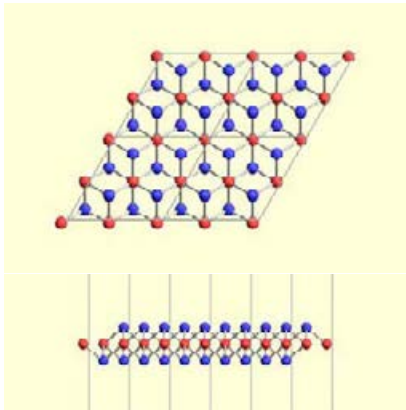

BTa<sub>2</sub> (T)

×

×

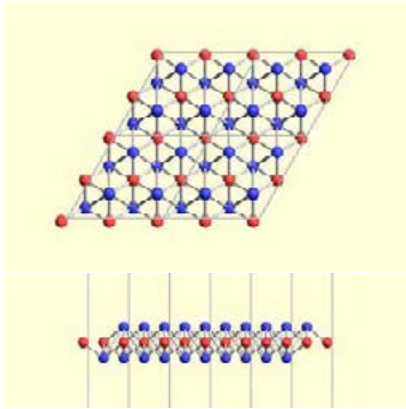

BW<sub>2</sub> (T)

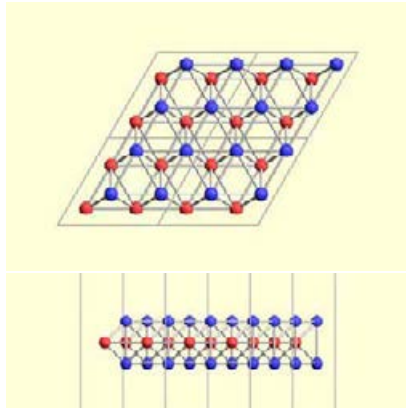

BW<sub>2</sub> (H)

×

×

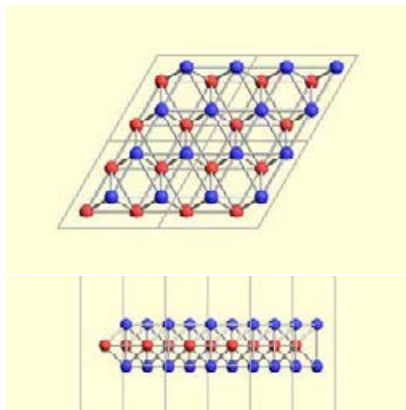

BRe<sub>2</sub> (H)

×

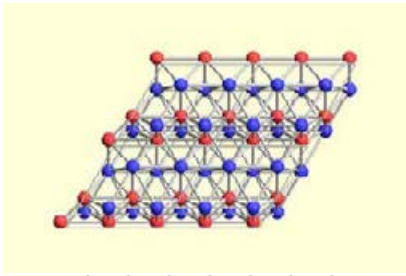

BOs<sub>2</sub> (T)

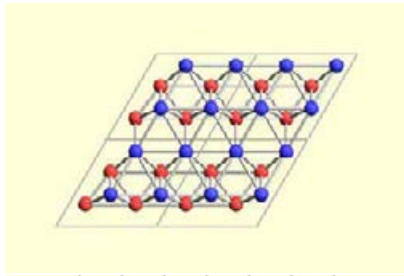

BOs<sub>2</sub> (H)

×

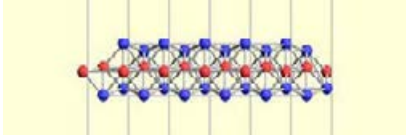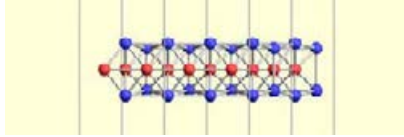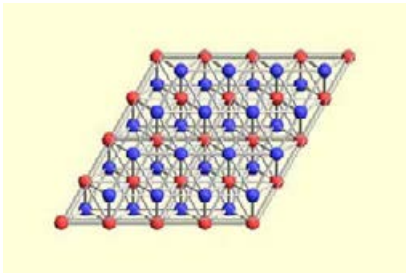

BIr<sub>2</sub> (T)

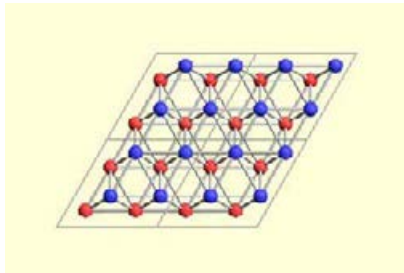

BIr<sub>2</sub> (H)

×

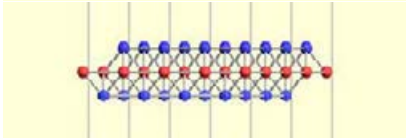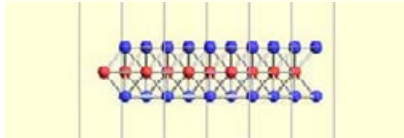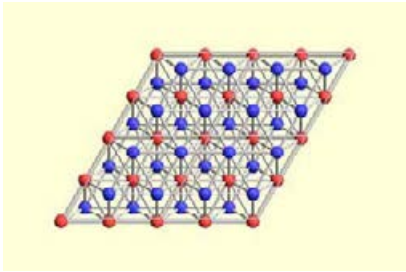

BPt<sub>2</sub> (T)

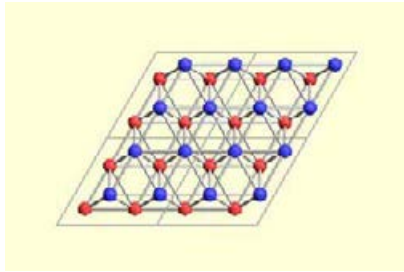

BPt<sub>2</sub> (H)

×

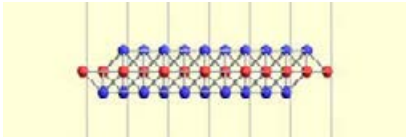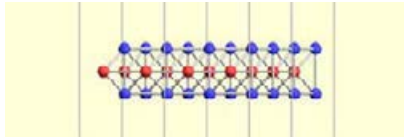

×

×

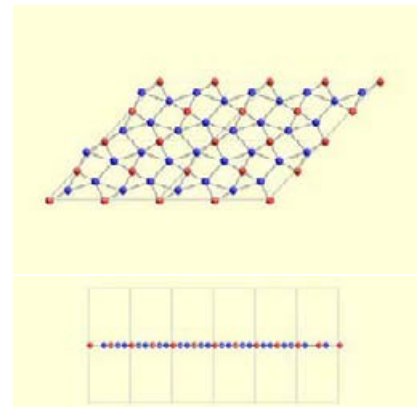

BAu<sub>2</sub> (P)

×

×

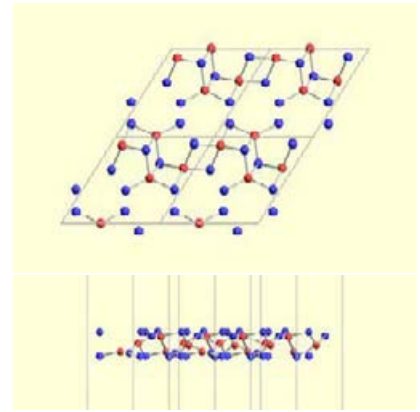

BBi<sub>2</sub> (P)

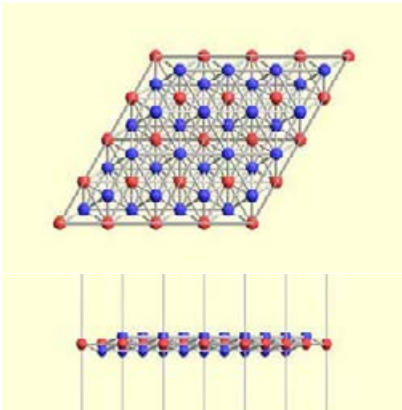

CBe<sub>2</sub> (T)

×

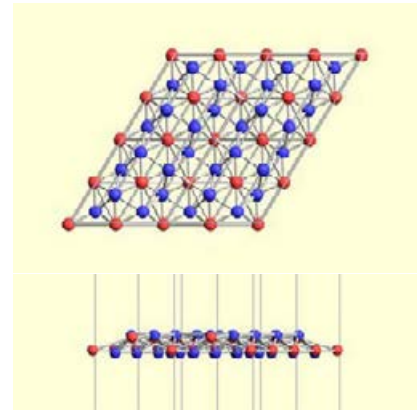

CBe<sub>2</sub> (P)

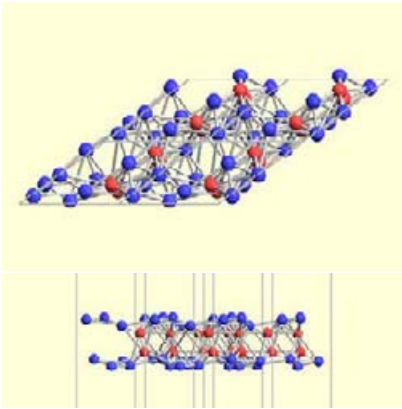

CB<sub>2</sub> (T)

×

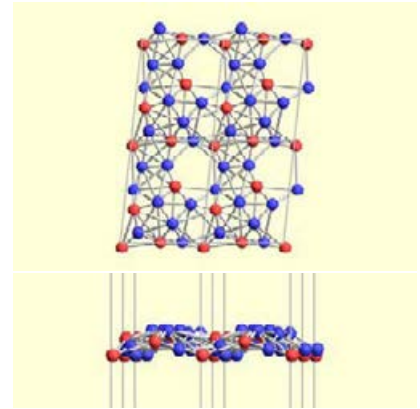

CB<sub>2</sub> (P)

×

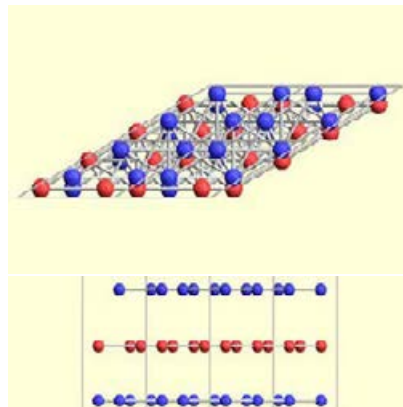

CC<sub>2</sub> (H)

×

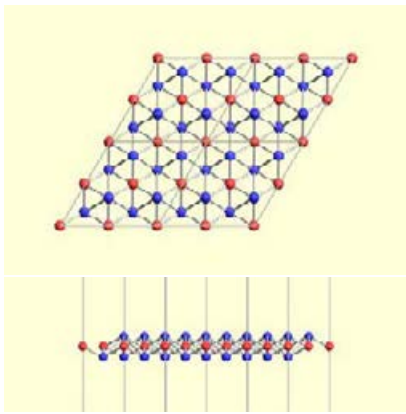

CMg<sub>2</sub> (T)

×

×

×

×

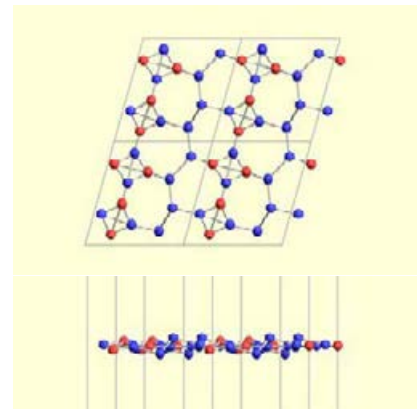

CSi<sub>2</sub> (P)

×

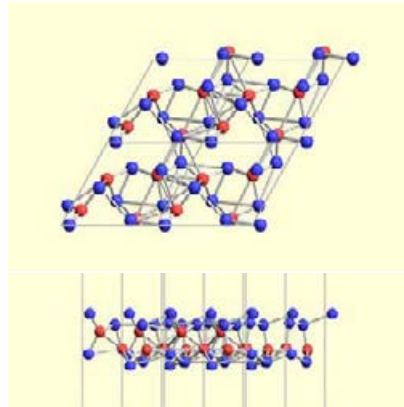

CP<sub>2</sub> (H)

×

×

×

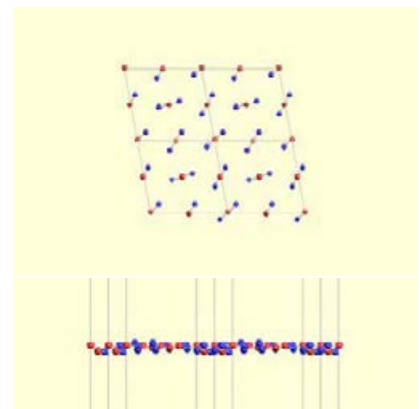

CS<sub>2</sub> (P)

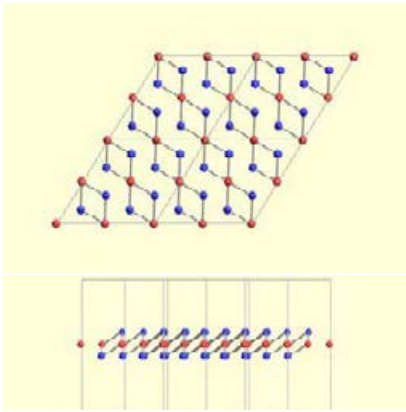

CK<sub>2</sub> (T)

×

×

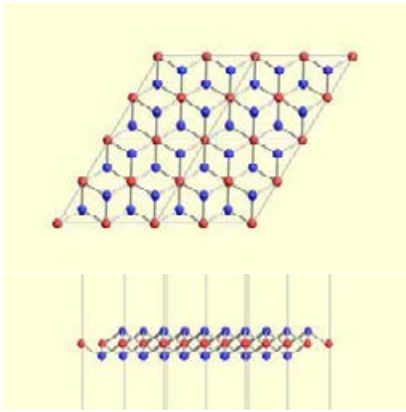

CCa<sub>2</sub> (T)

×

×

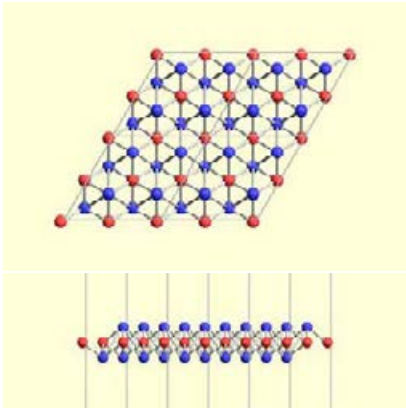

CTi<sub>2</sub> (T)

×

×

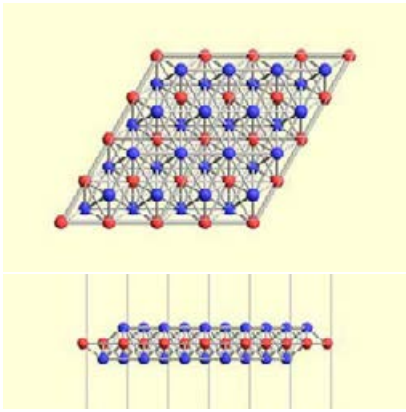

CV<sub>2</sub> (T)

×

×



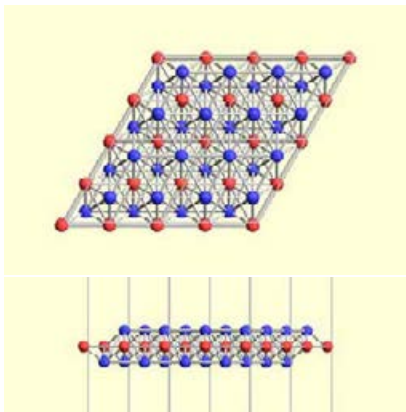

CCr<sub>2</sub> (T)

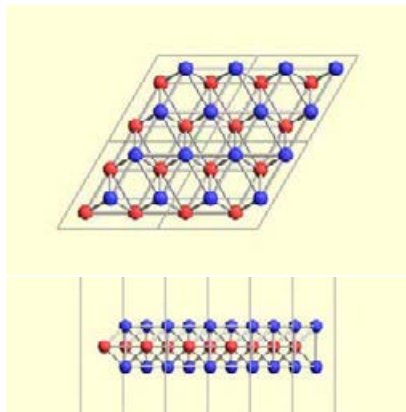

CCr<sub>2</sub> (H)

×

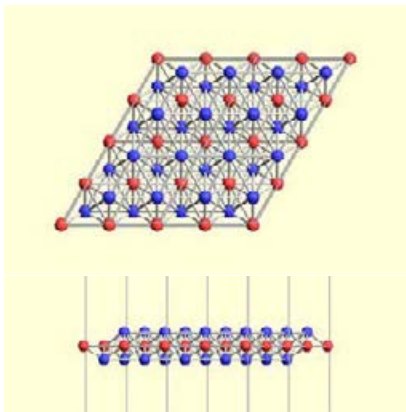

CNi<sub>2</sub> (T)

×

×

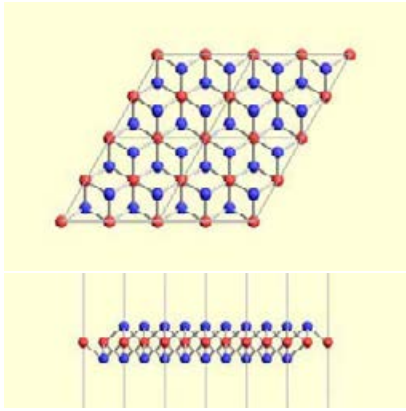

CGe<sub>2</sub> (T)

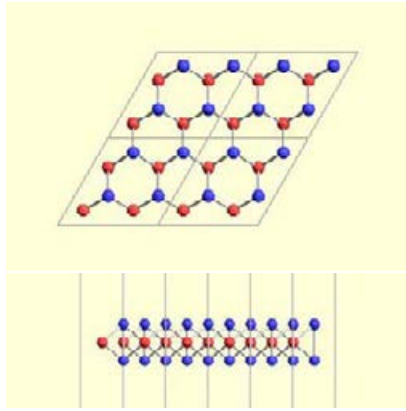

CGe<sub>2</sub> (H)

×

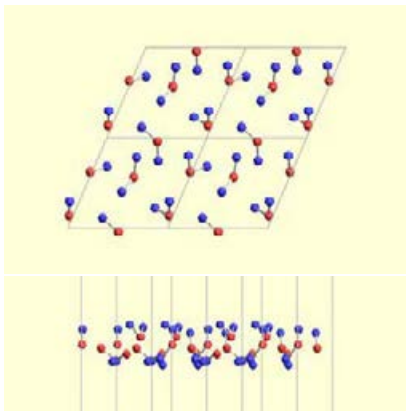

CBr<sub>2</sub> (T)

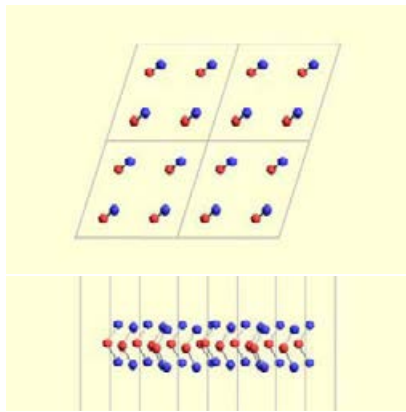

CBr<sub>2</sub> (H)

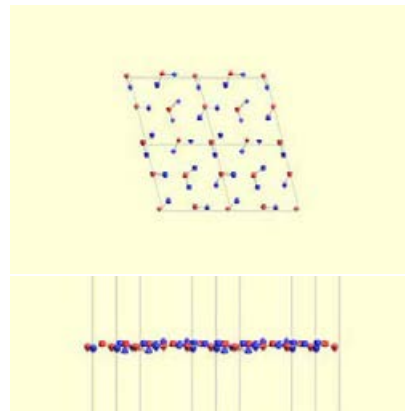

CBr<sub>2</sub> (P)

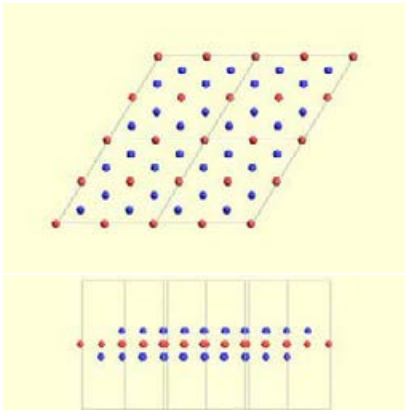

CRb<sub>2</sub> (T)

×

×

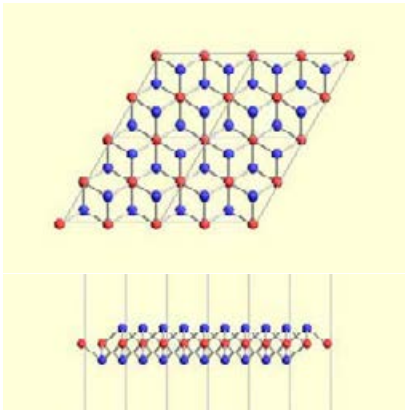

CY<sub>2</sub> (T)

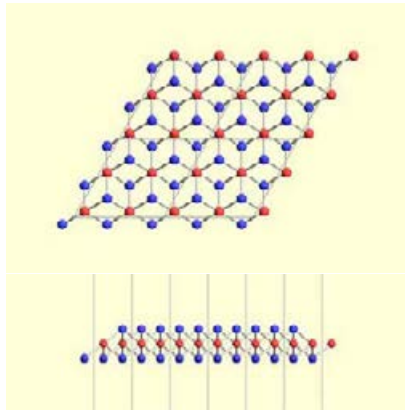

CY<sub>2</sub> (H)

×

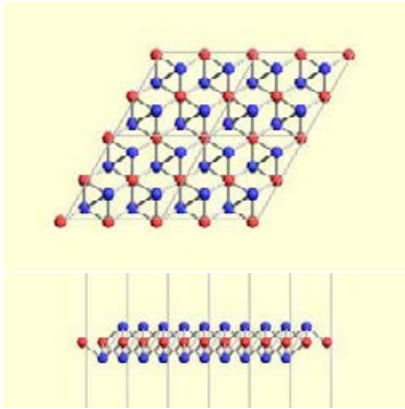

CNb<sub>2</sub> (T)

×

×

×

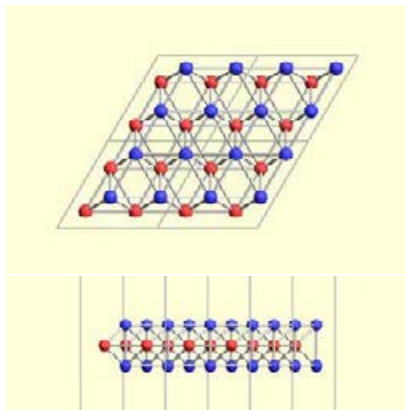

CMo<sub>2</sub> (H)

×



×

×

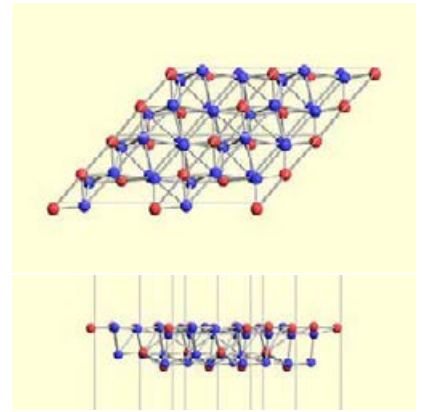

$CTc_2$  (P)

×

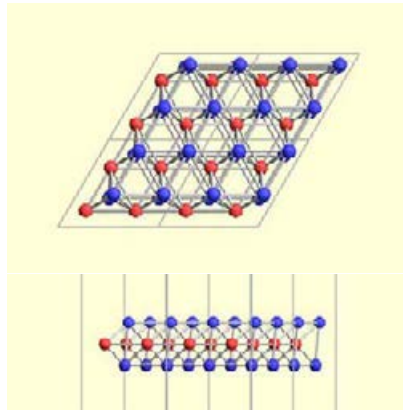

$CRu_2$  (H)

×

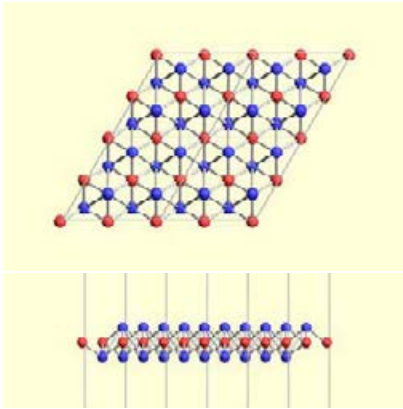

$CPd_2$  (T)

×

×

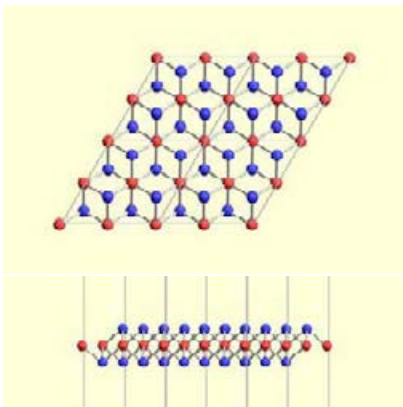

$CAg_2$  (T)

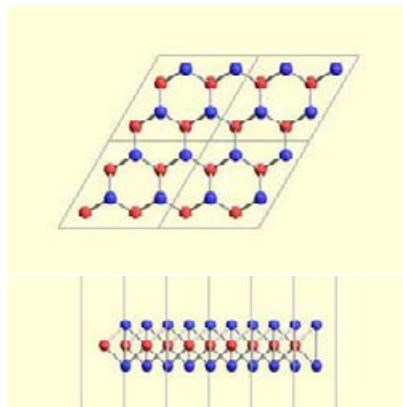

$CAg_2$  (H)

×

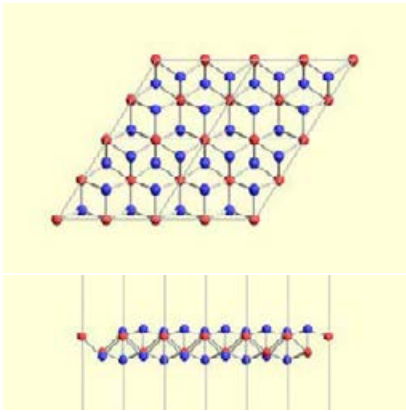

CCd<sub>2</sub> (T)

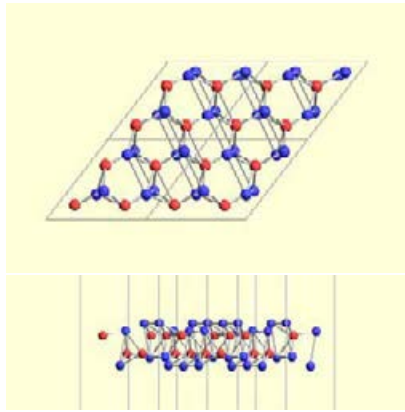

CCd<sub>2</sub> (H)

×

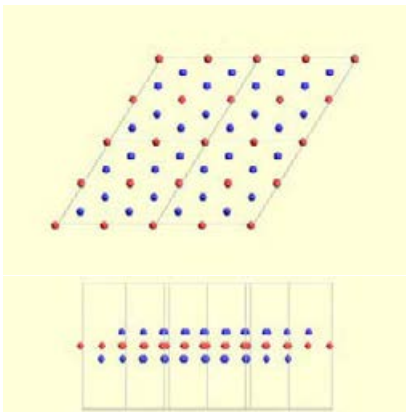

CCs<sub>2</sub> (T)

×

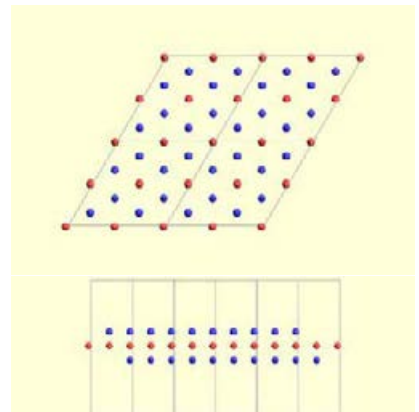

CCs<sub>2</sub> (P)

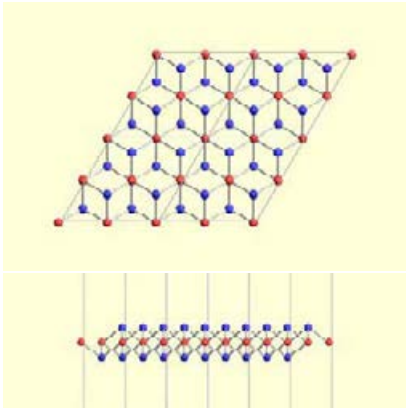

CBa<sub>2</sub> (T)

×

×

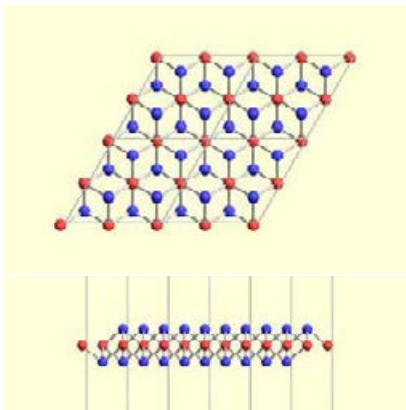

CHF<sub>2</sub> (T)

×

×

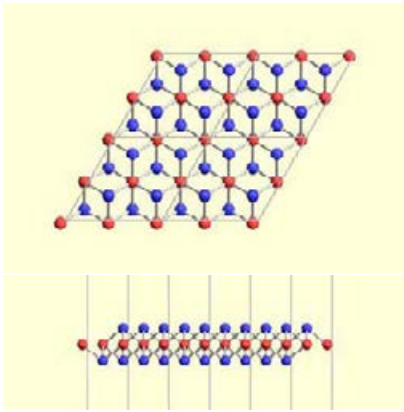

CTa<sub>2</sub> (T)

×

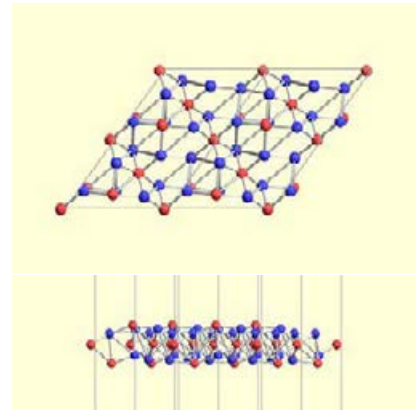

CTa<sub>2</sub> (P)

×

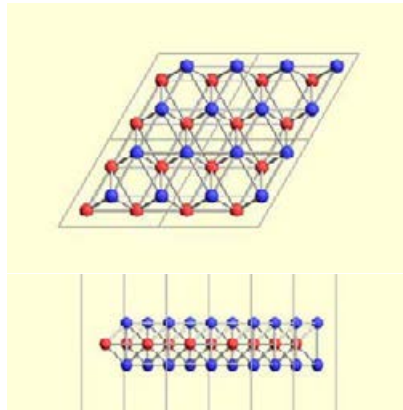

CW<sub>2</sub> (H)

×

×

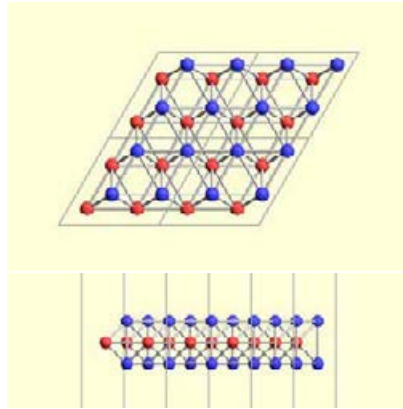

CRe<sub>2</sub> (H)

×

×

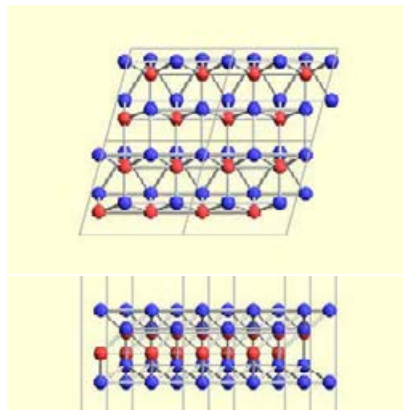

CPt<sub>2</sub> (H)

×

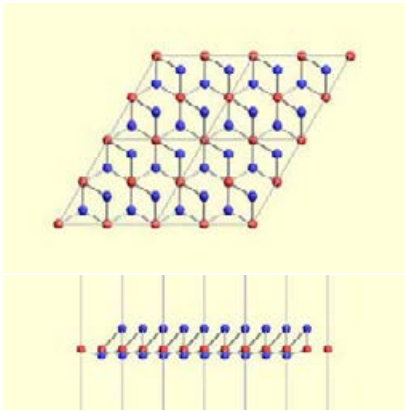

CTI<sub>2</sub> (T)

×

×

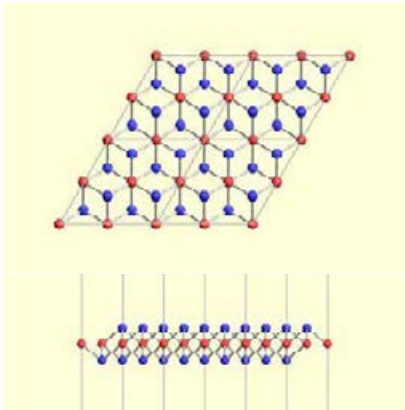

CPb<sub>2</sub> (T)

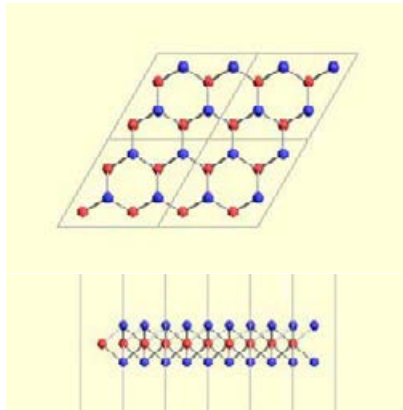

CPb<sub>2</sub> (H)

×

×

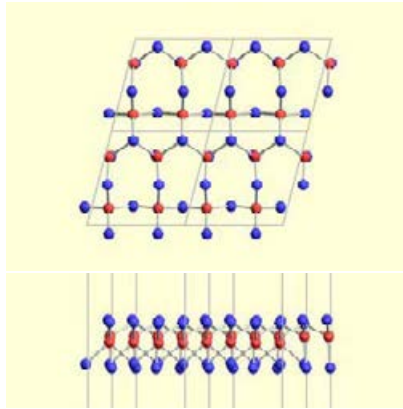

CBI<sub>2</sub> (H)

×

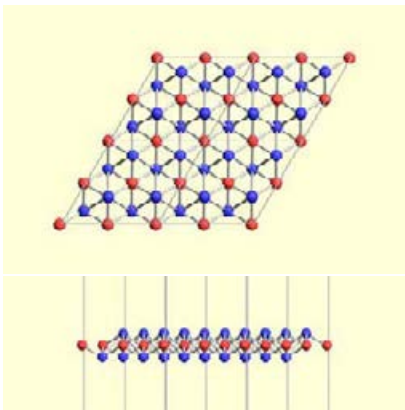

NLi<sub>2</sub> (T)

×

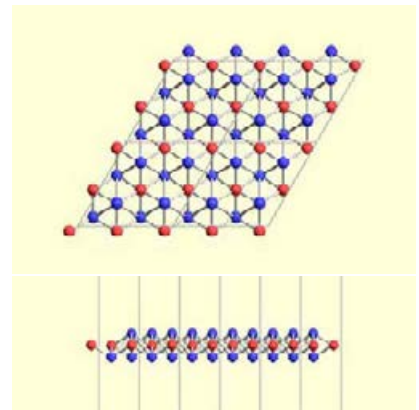

NLi<sub>2</sub> (P)

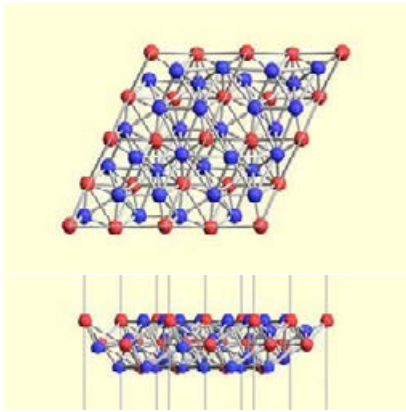

$\text{NBe}_2$  (T)

×

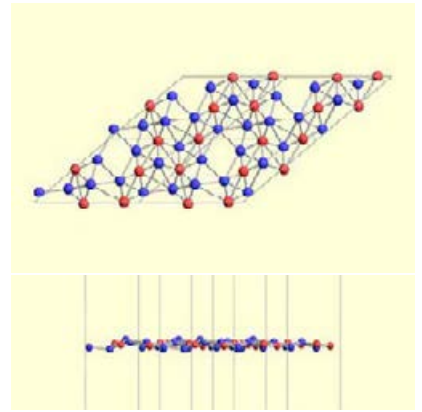

$\text{NBe}_2$  (P)

×

×

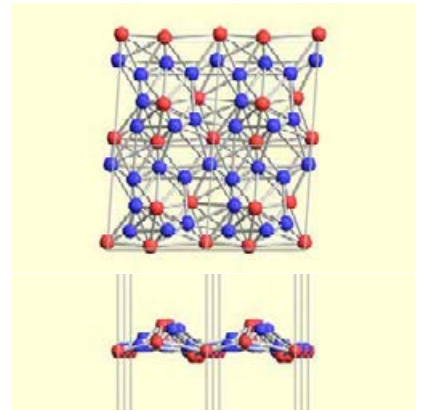

$\text{NC}_2$  (P)

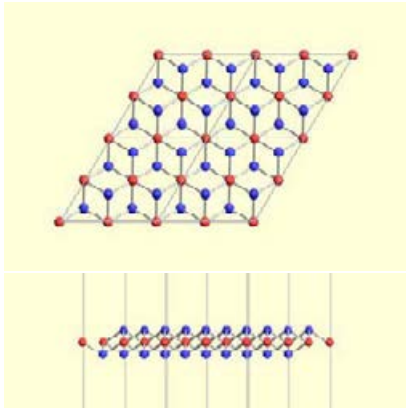

$\text{NNa}_2$  (T)

×

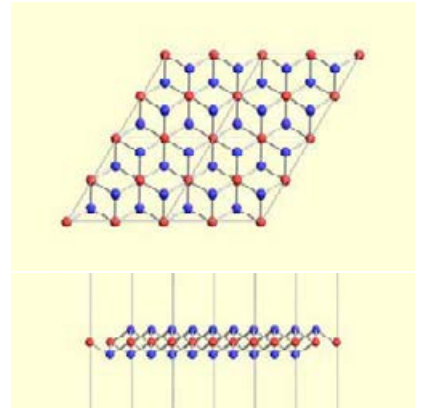

$\text{NNa}_2$  (P)

×

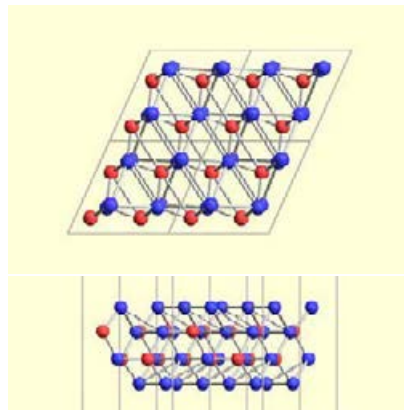

$\text{NAl}_2$  (H)

×



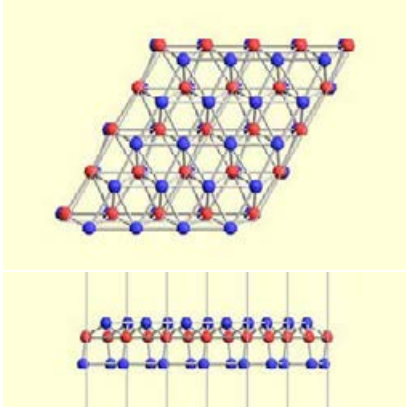

NSi<sub>2</sub> (T)

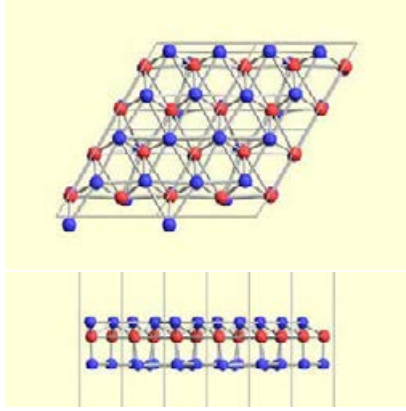

NSi<sub>2</sub> (H)

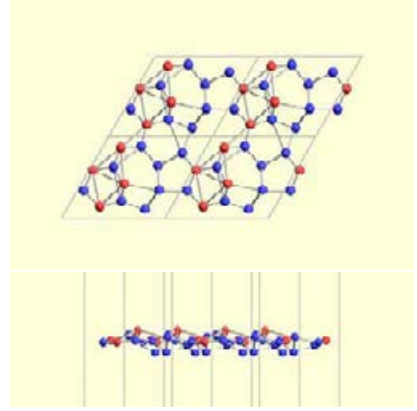

NSi<sub>2</sub> (P)

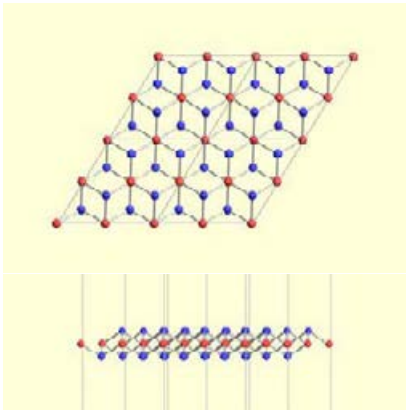

NK<sub>2</sub> (T)

×

×

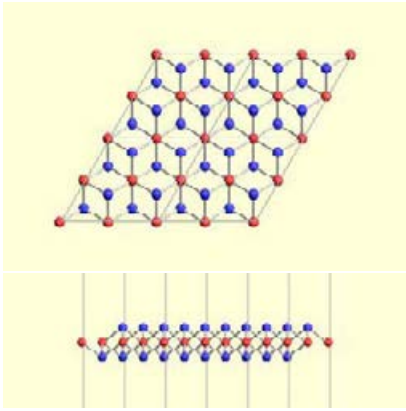

NCa<sub>2</sub> (T)

×

×

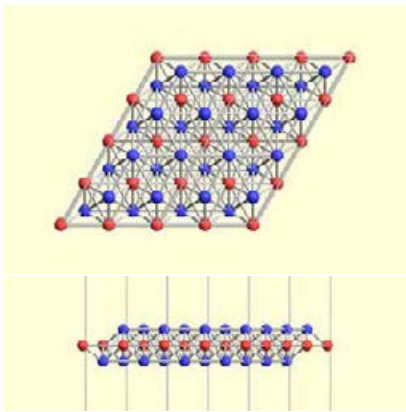

NTi<sub>2</sub> (T)

×

×

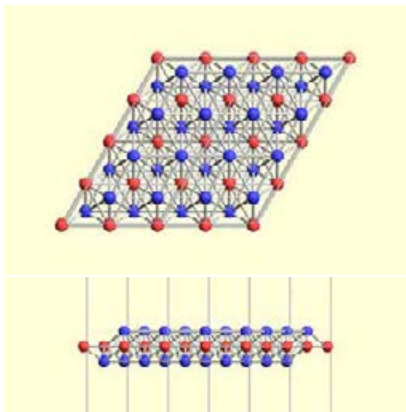

NV<sub>2</sub> (T)

×

×

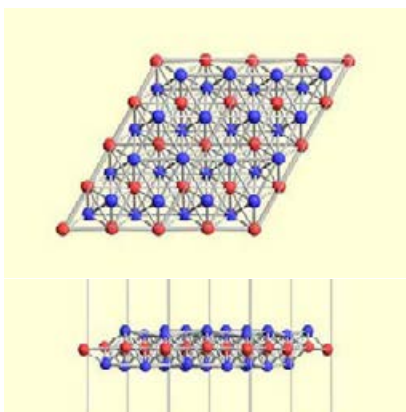

NCr<sub>2</sub> (T)

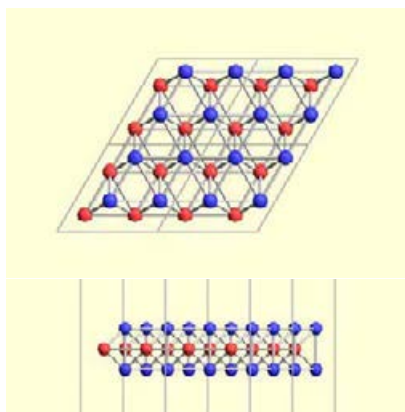

NCr<sub>2</sub> (H)

×

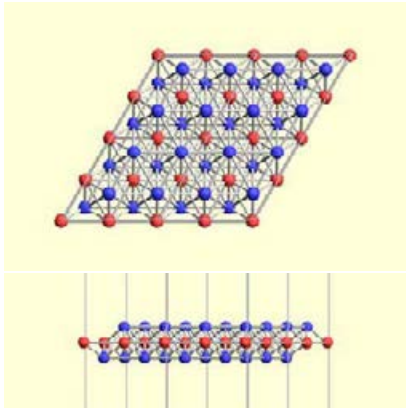

NNi<sub>2</sub> (T)

×

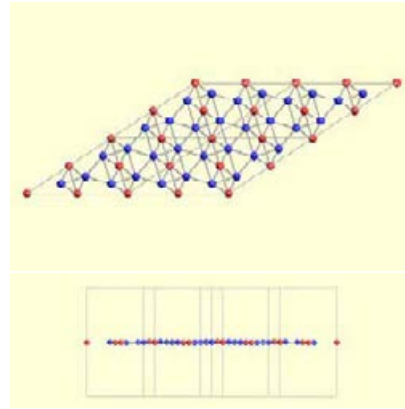

NNi<sub>2</sub> (P)

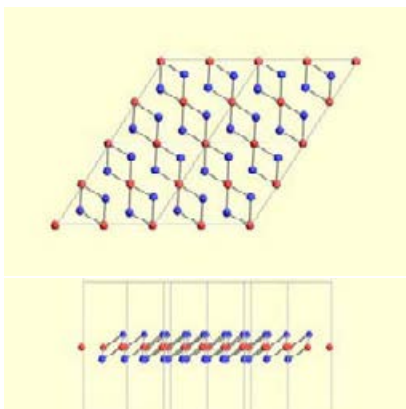

NRb<sub>2</sub> (T)

×

×

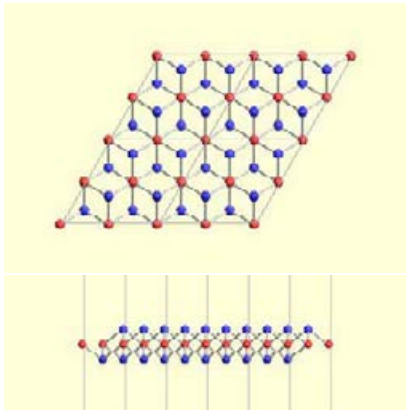

NSr<sub>2</sub> (T)

×

×

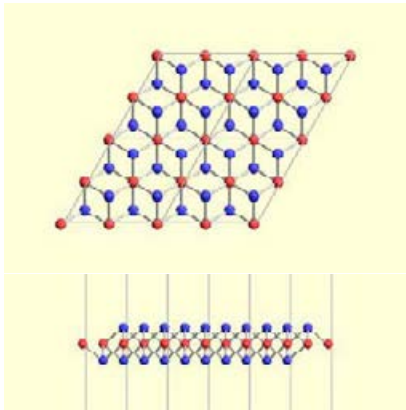

NY<sub>2</sub> (T)

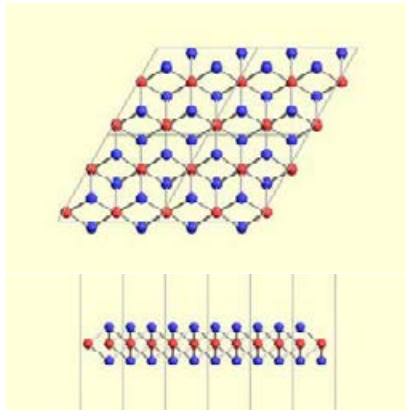

NY<sub>2</sub> (H)

×

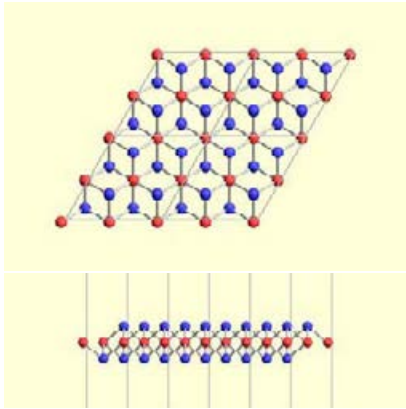

NZr<sub>2</sub> (T)

×

×

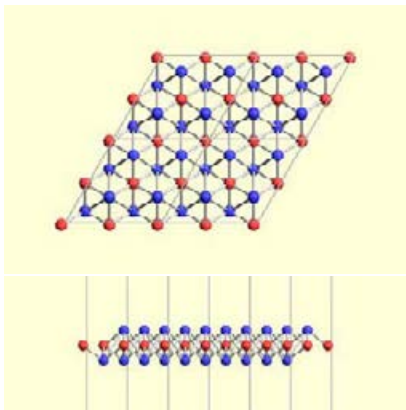

NNb<sub>2</sub> (T)

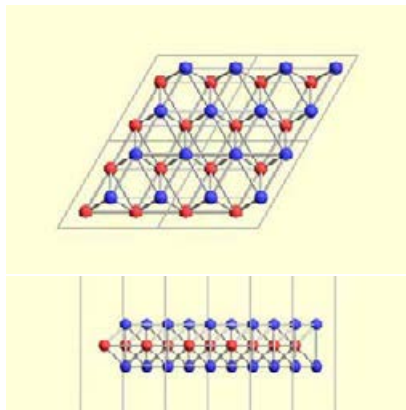

NNb<sub>2</sub> (H)

×



×

×

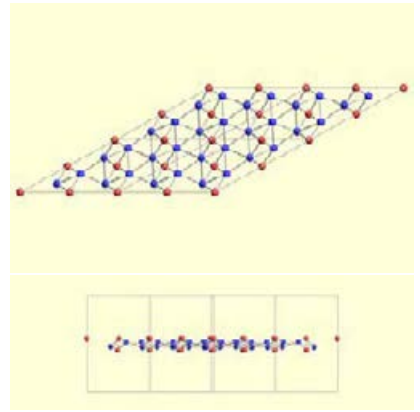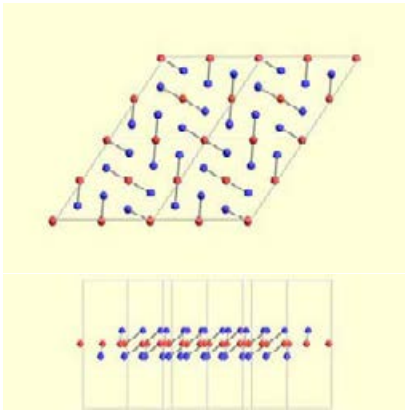

×

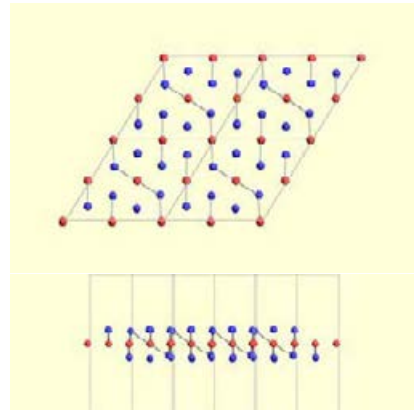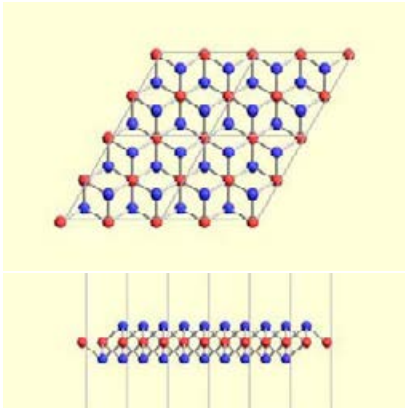

×

×

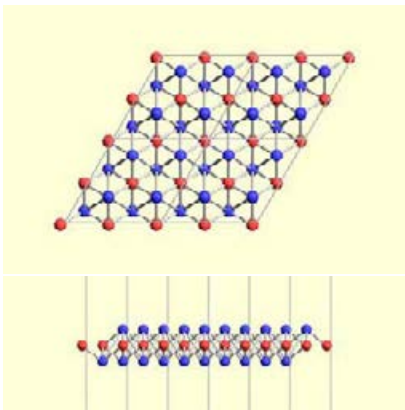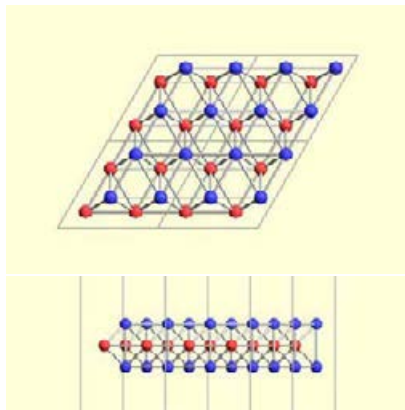

×

×

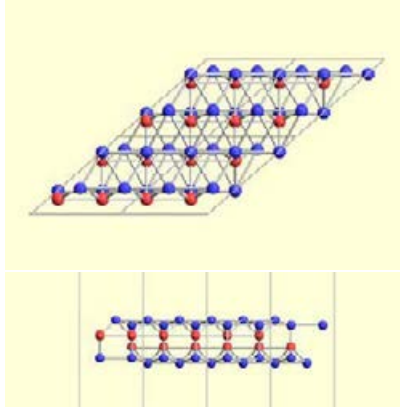

×

NOs<sub>2</sub> (H)

×

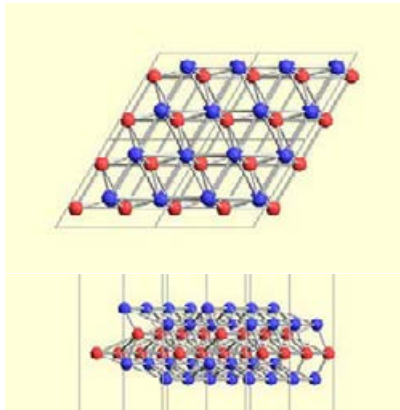

×

Nlr<sub>2</sub> (H)

×

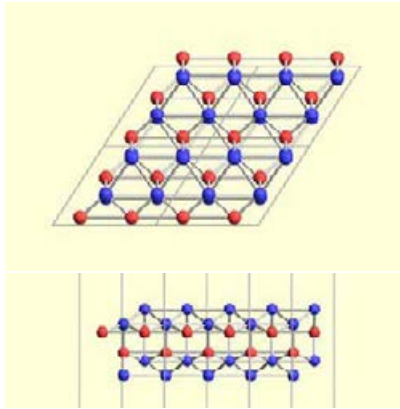

×

NPt<sub>2</sub> (H)

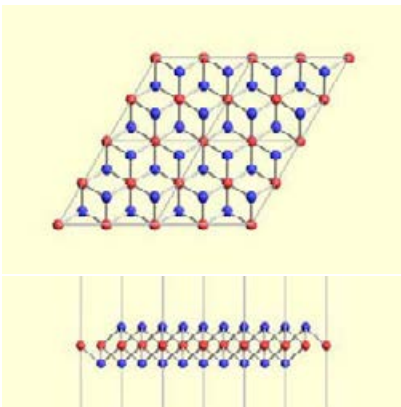

NPb<sub>2</sub> (T)

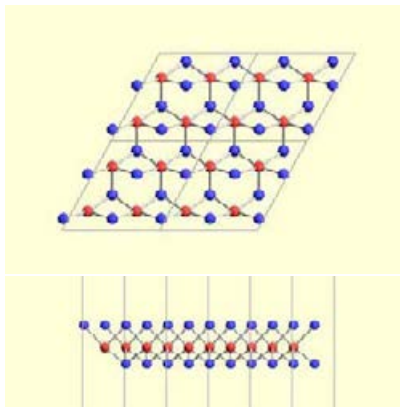

NPb<sub>2</sub> (H)

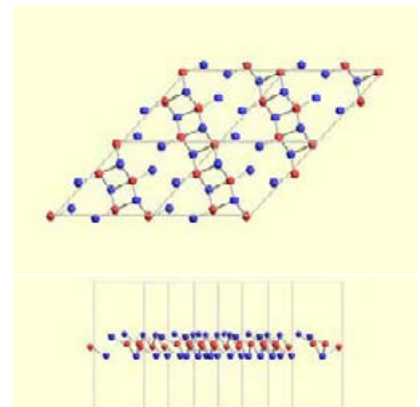

NPb<sub>2</sub> (P)

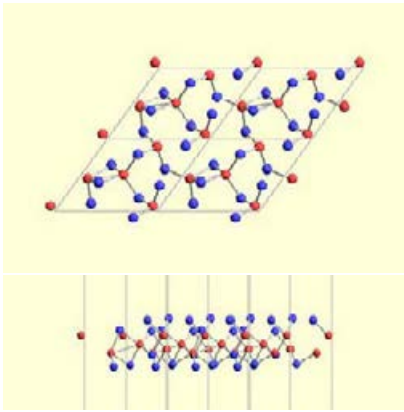

Nb<sub>2</sub> (T)

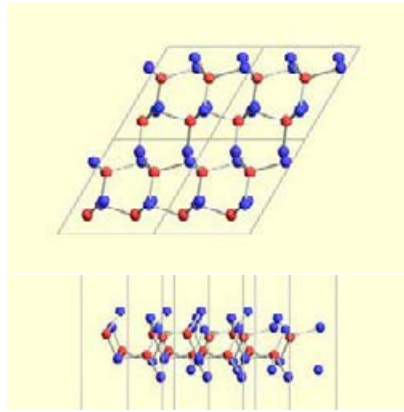

Nb<sub>2</sub> (H)

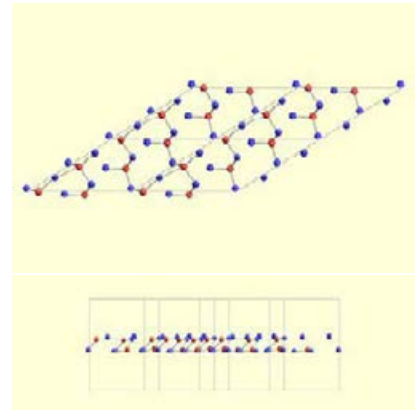

Nb<sub>2</sub> (P)

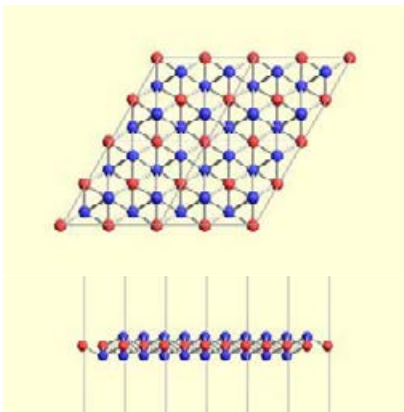

OLi<sub>2</sub> (T)

×

×

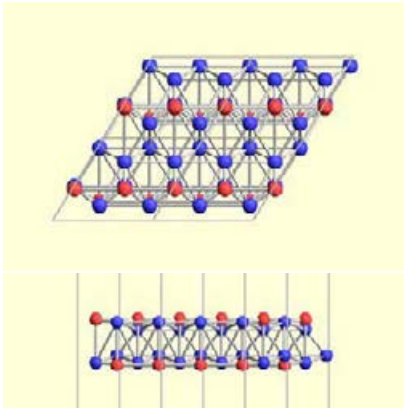

OBe<sub>2</sub> (T)

×

×

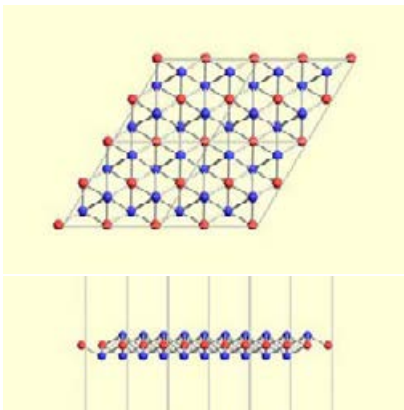

ONa<sub>2</sub> (T)

×

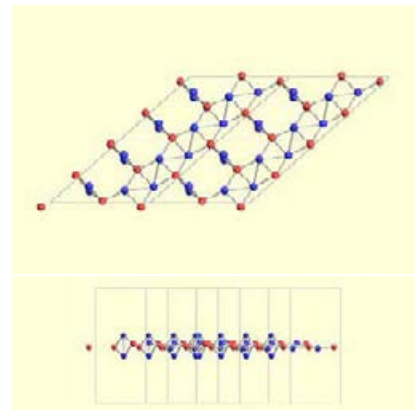

ONa<sub>2</sub> (P)

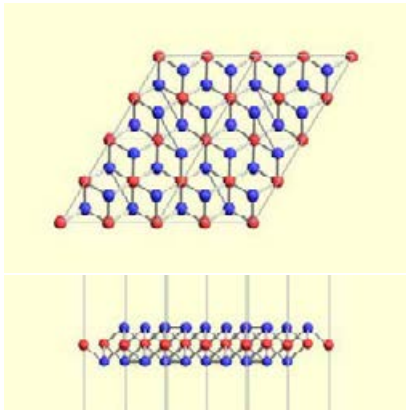

OMg<sub>2</sub> (T)

×

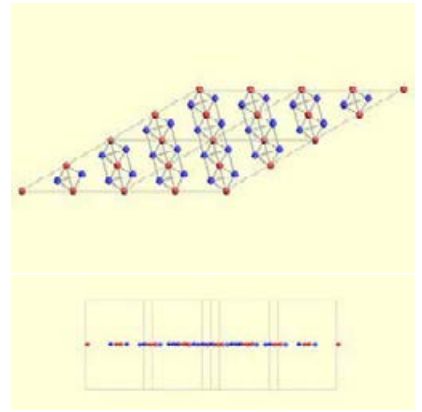

OMg<sub>2</sub> (P)

×

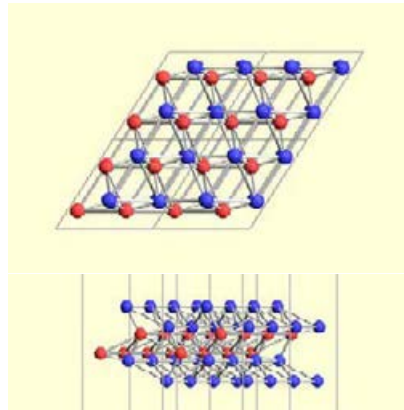

OAl<sub>2</sub> (H)

×

×

×

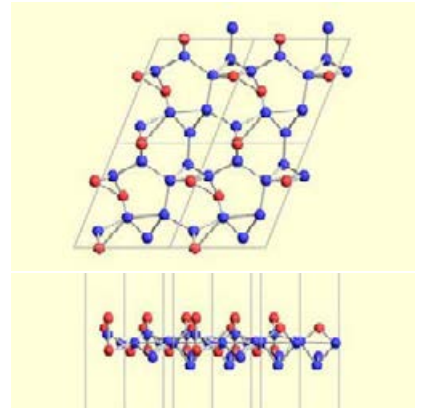

OSi<sub>2</sub> (P)

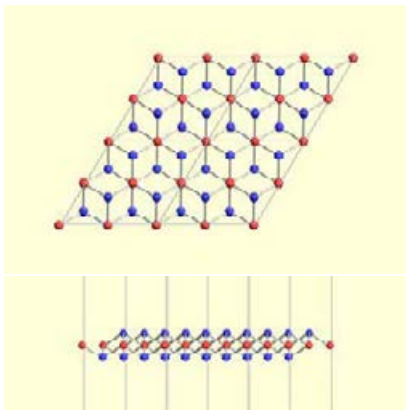

OK<sub>2</sub> (T)

×

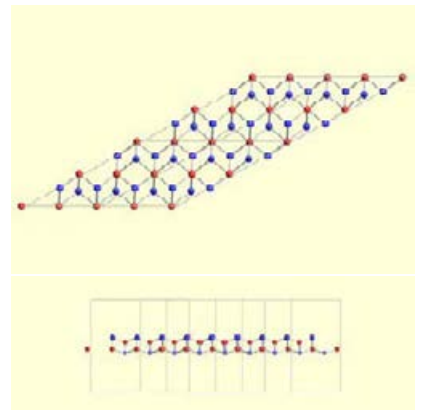

OK<sub>2</sub> (P)

×

×

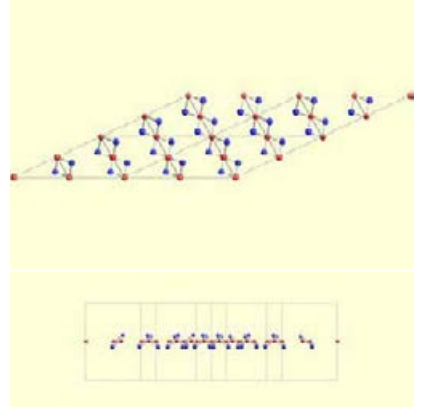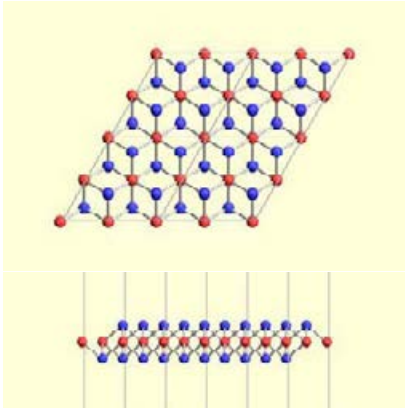

×

×

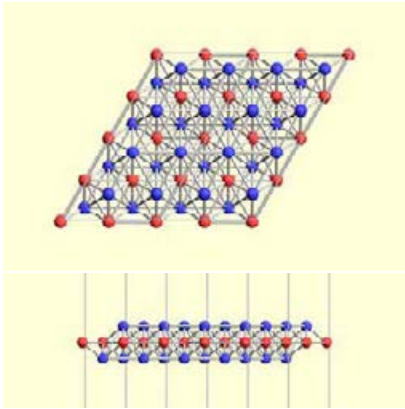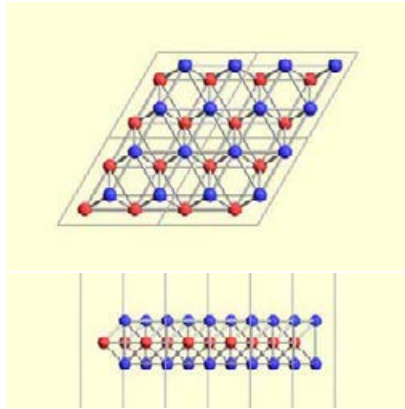

×

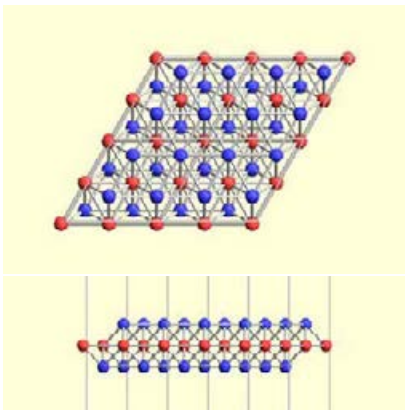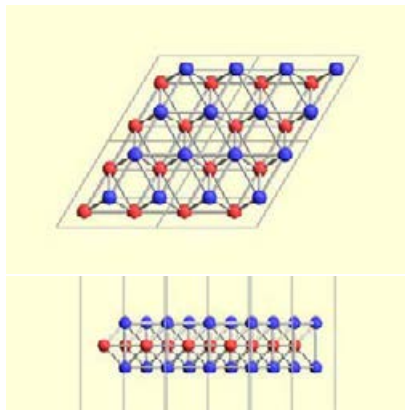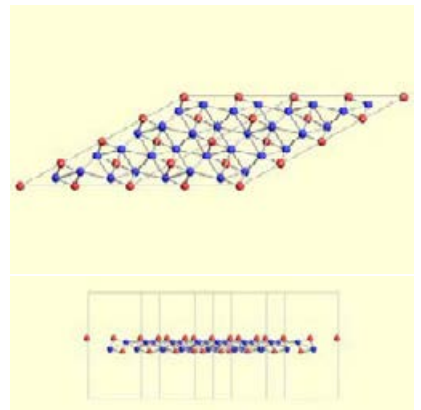



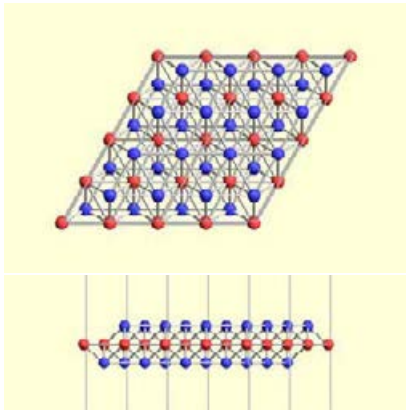

OCr<sub>2</sub> (T)

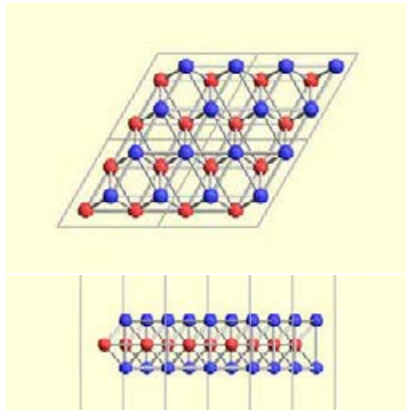

OCr<sub>2</sub> (H)

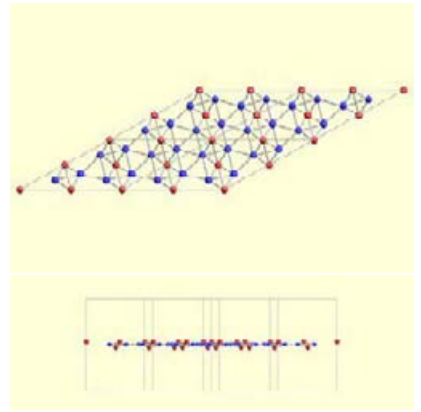

OCr<sub>2</sub> (P)

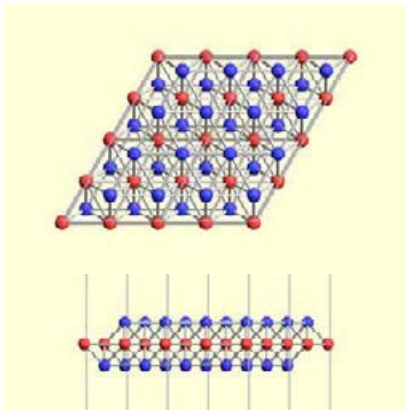

OFe<sub>2</sub> (T)

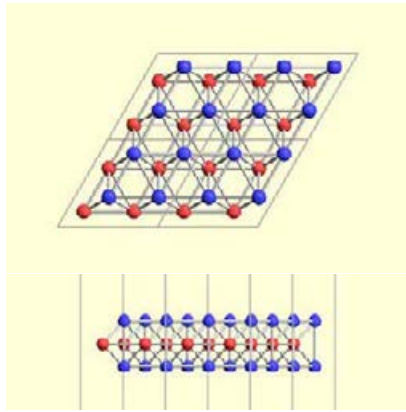

OFe<sub>2</sub> (H)

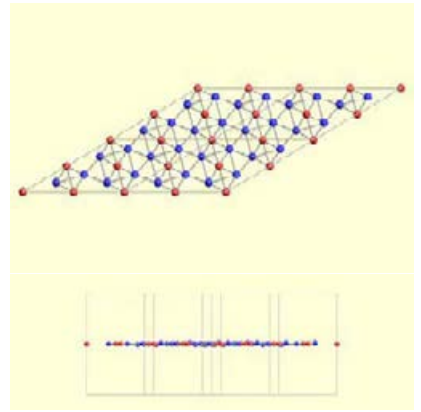

OFe<sub>2</sub> (P)

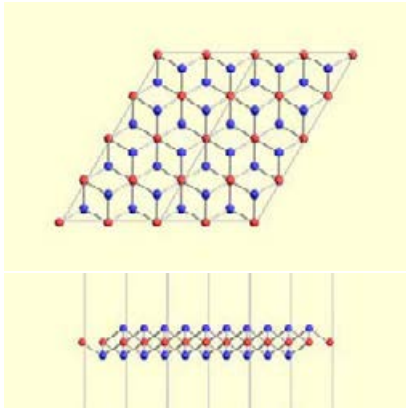

ORb<sub>2</sub> (T)

×

×

×

×

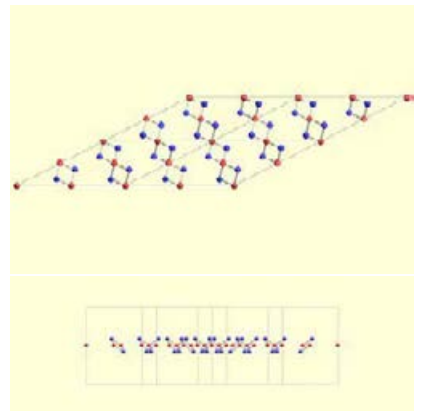

OSr<sub>2</sub> (P)



×

×

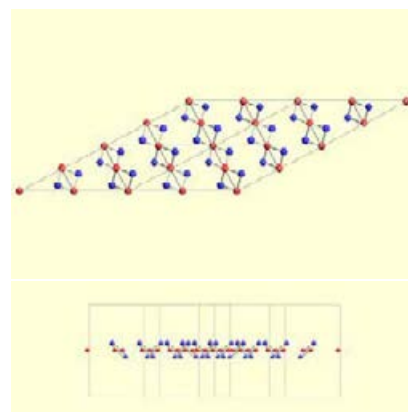

OY<sub>2</sub> (P)

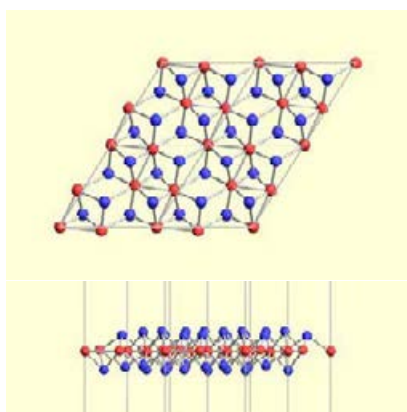

OZr<sub>2</sub> (T)

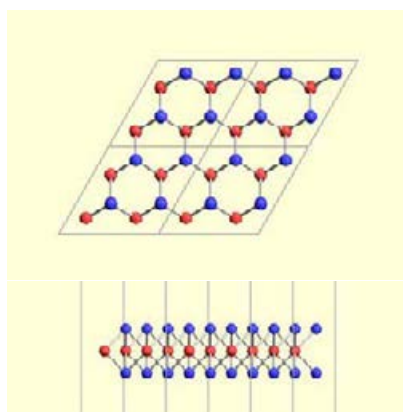

OZr<sub>2</sub> (H)

×

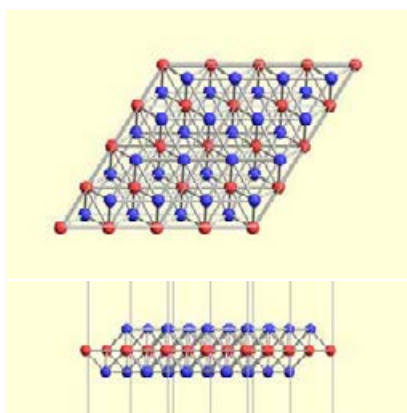

ONb<sub>2</sub> (T)

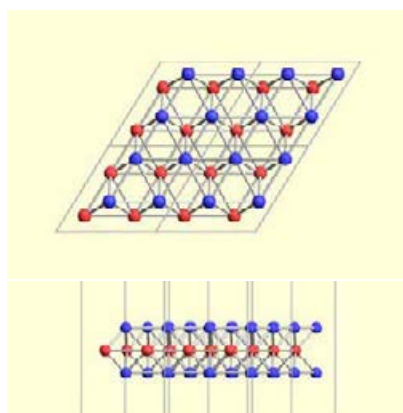

ONb<sub>2</sub> (H)

×

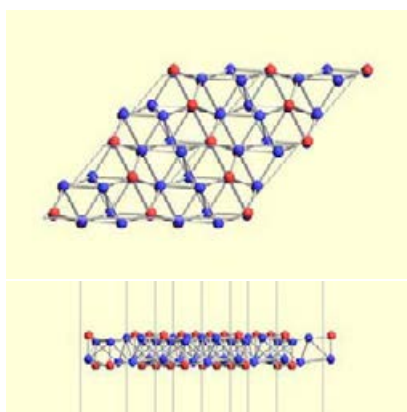

OMo<sub>2</sub> (T)

×

×

×

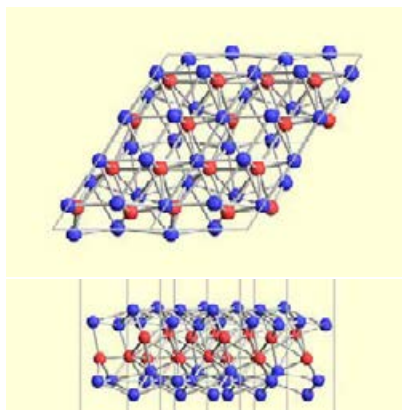

ORu<sub>2</sub> (H)

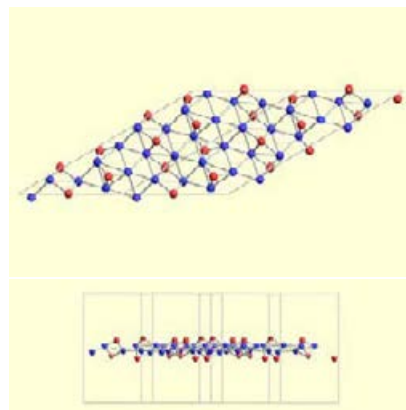

ORu<sub>2</sub> (P)

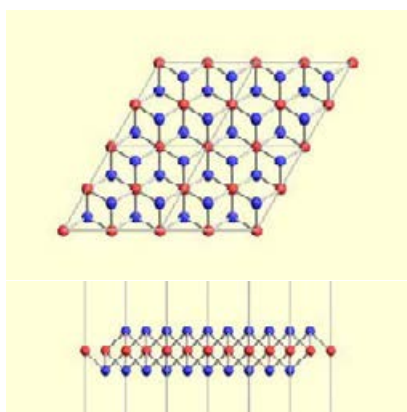

OIn<sub>2</sub> (T)

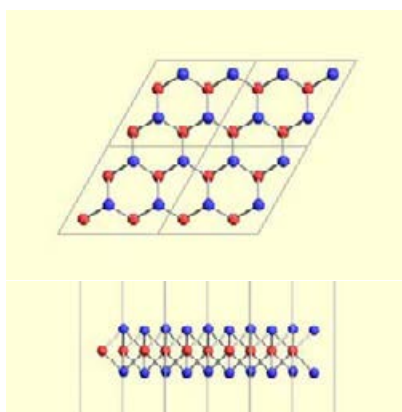

OIn<sub>2</sub> (H)

×

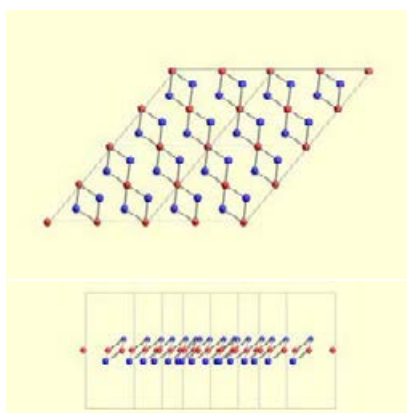

OCs<sub>2</sub> (T)

×

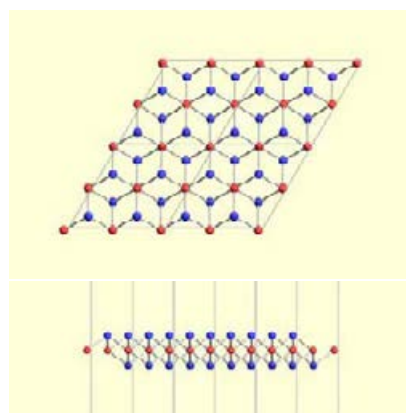

OCs<sub>2</sub> (P)

×

×

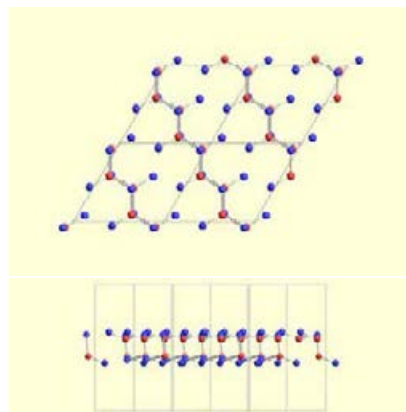

OBa<sub>2</sub> (P)

×

×

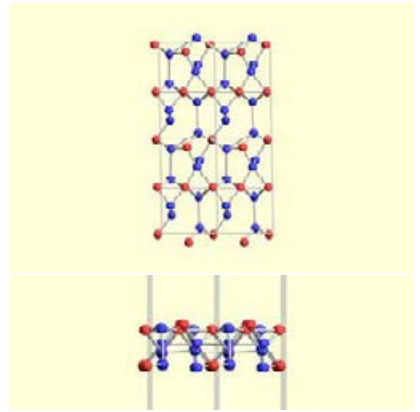

OHf<sub>2</sub> (P)

×

×

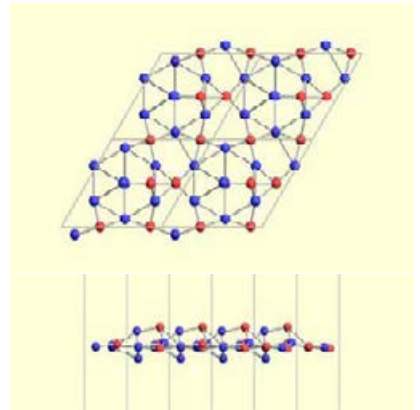

OTa<sub>2</sub> (P)

×

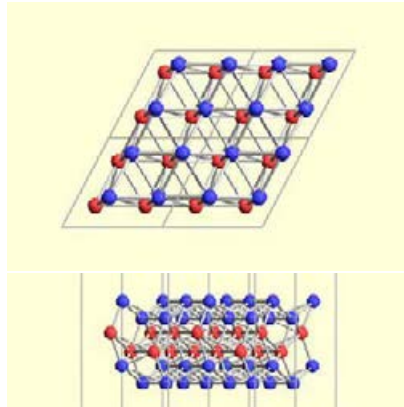

OW<sub>2</sub> (H)

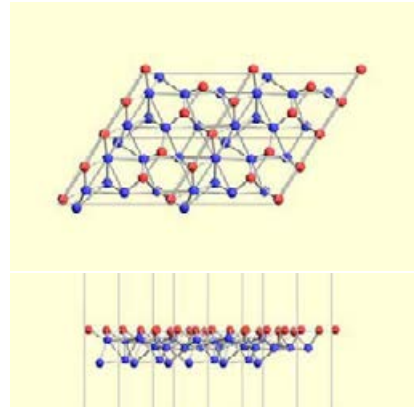

OW<sub>2</sub> (P)

×

×

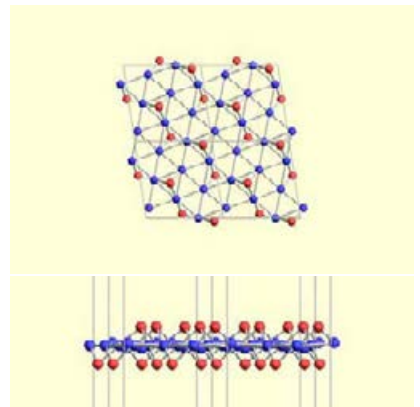

OPt<sub>2</sub> (P)

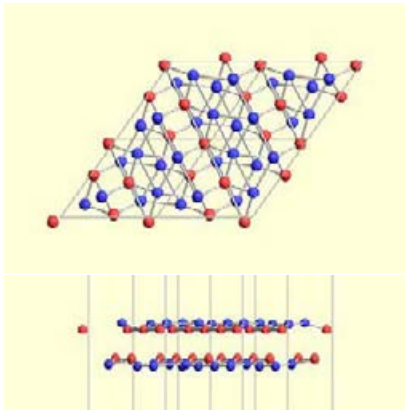

OAu<sub>2</sub> (T)

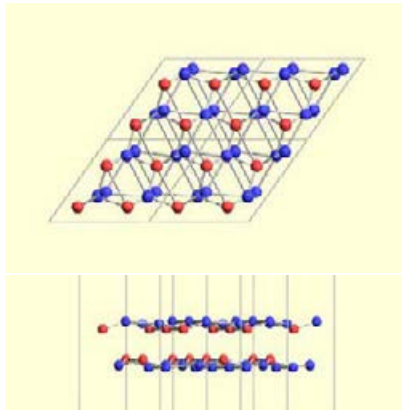

OAu<sub>2</sub> (H)

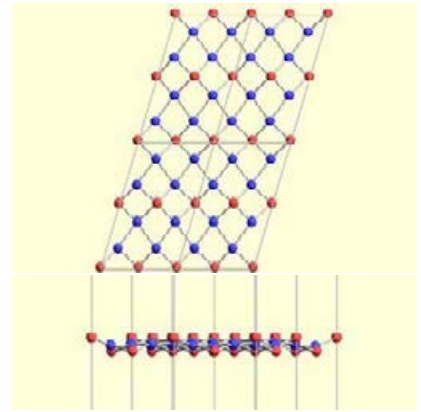

OAu<sub>2</sub> (P)

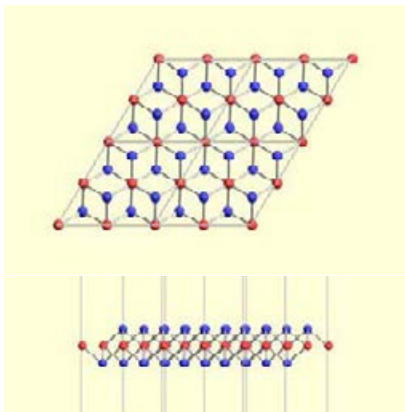

OTl<sub>2</sub> (T)

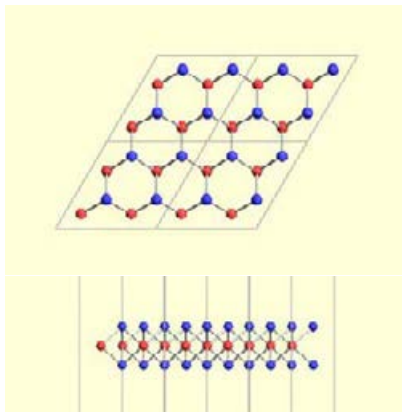

OTl<sub>2</sub> (H)

×

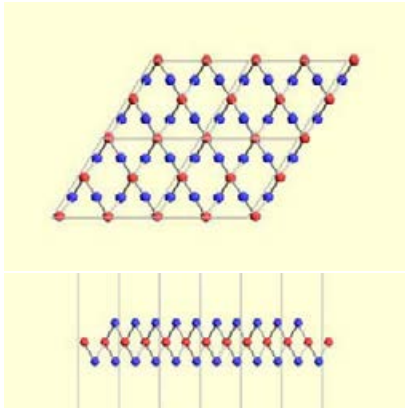

OPb<sub>2</sub> (T)

×

×

×

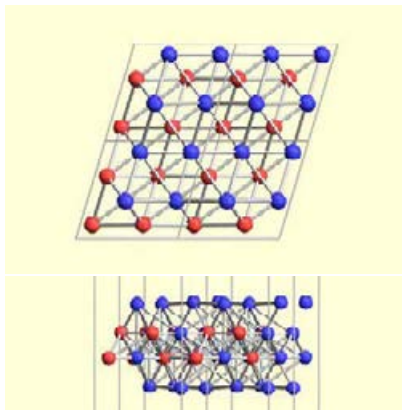

FLi<sub>2</sub> (H)

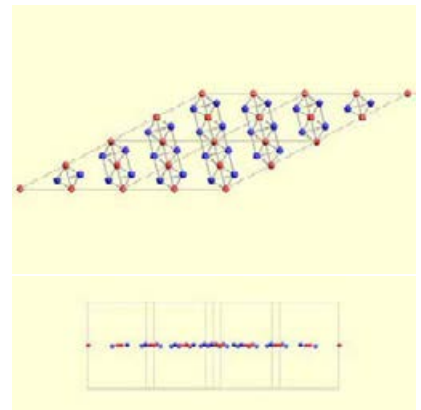

FLi<sub>2</sub> (P)

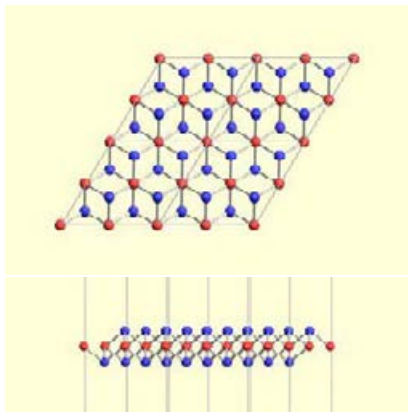

FNa<sub>2</sub> (T)

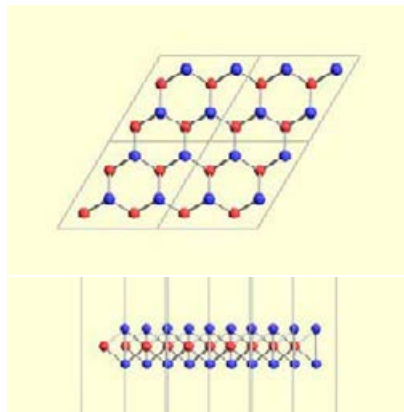

FNa<sub>2</sub> (H)

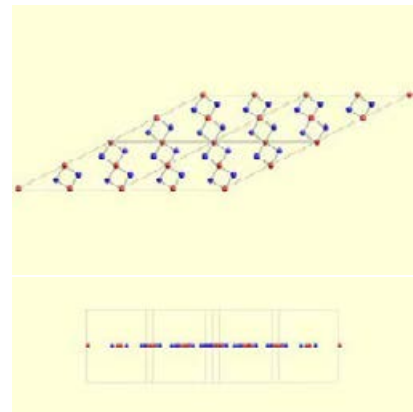

FNa<sub>2</sub> (P)

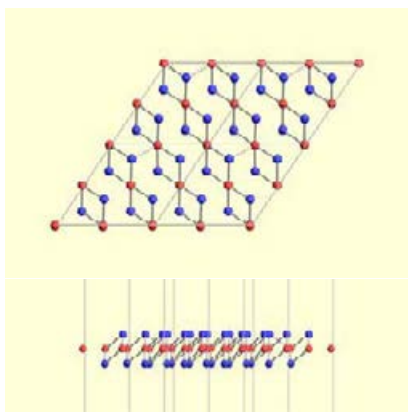

FK<sub>2</sub> (T)

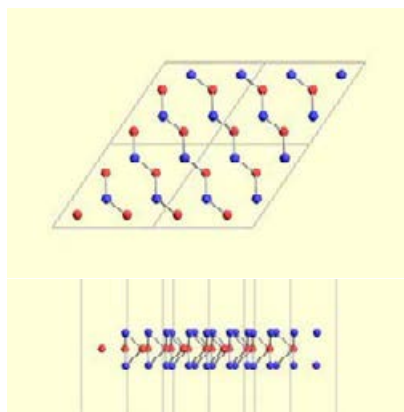

FK<sub>2</sub> (H)

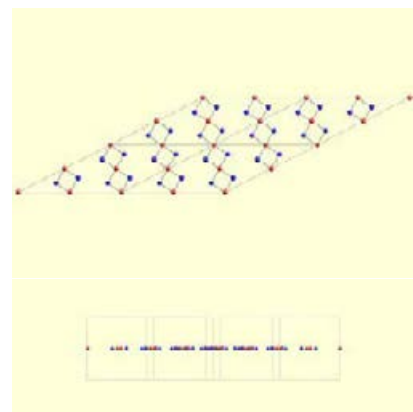

FK<sub>2</sub> (P)

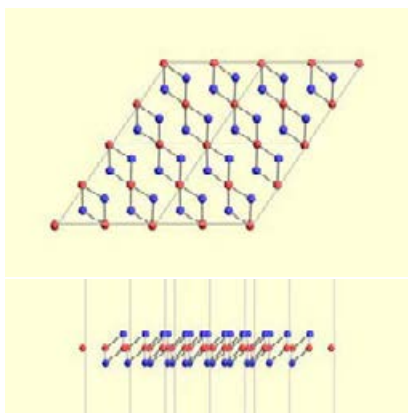

FRb<sub>2</sub> (T)

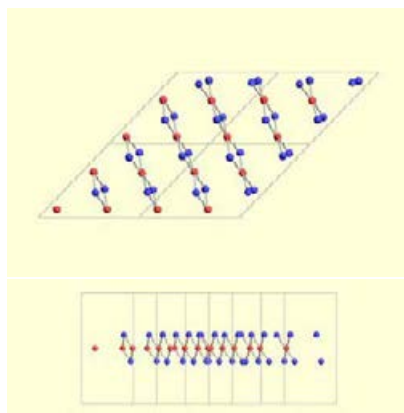

FRb<sub>2</sub> (H)

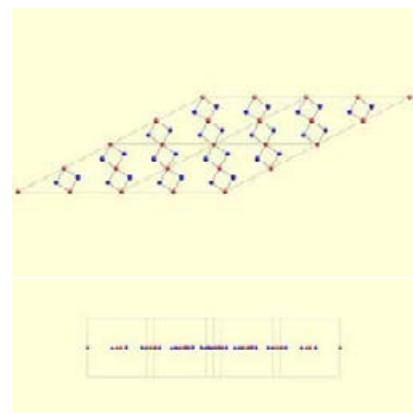

FRb<sub>2</sub> (P)

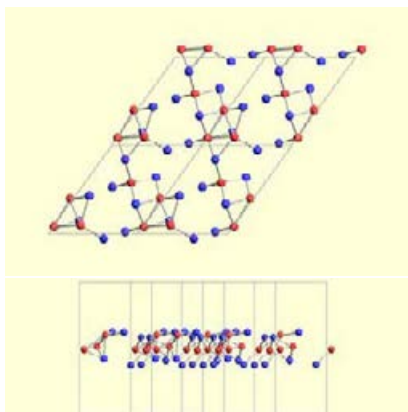

FSr<sub>2</sub> (T)

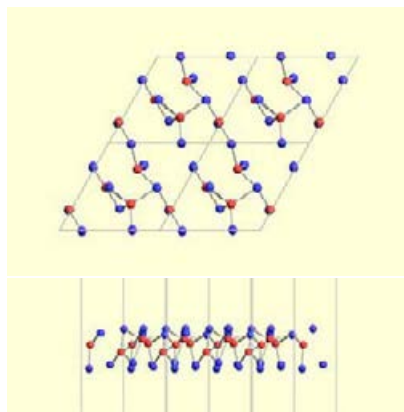

FSr<sub>2</sub> (H)

×



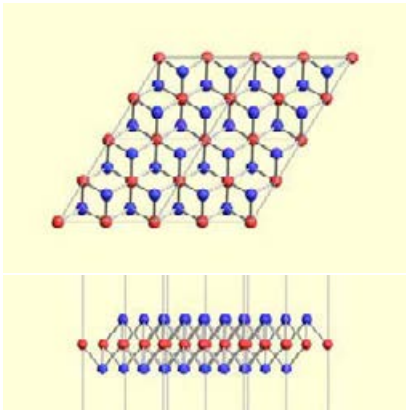

FCd<sub>2</sub> (T)

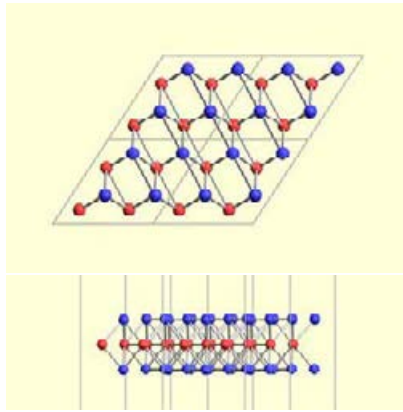

FCd<sub>2</sub> (H)

×

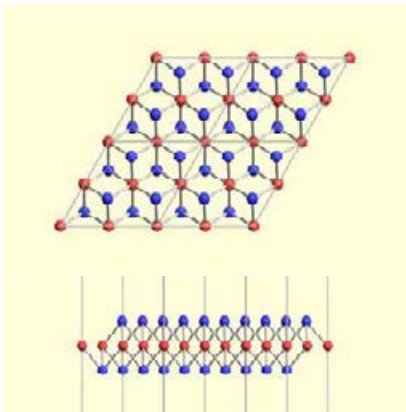

FIn<sub>2</sub> (T)

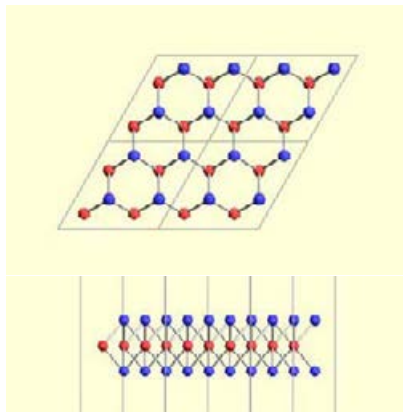

FIn<sub>2</sub> (H)

×

×

×

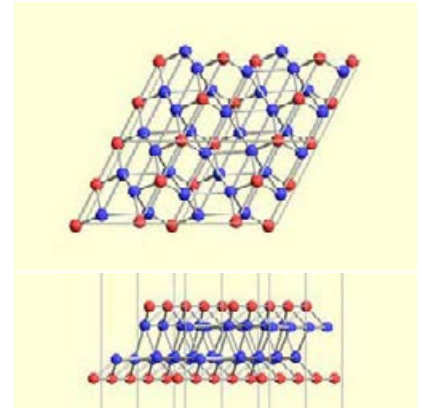

FTa<sub>2</sub> (P)

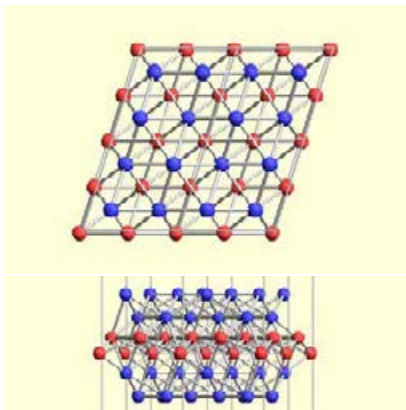

FAu<sub>2</sub> (T)

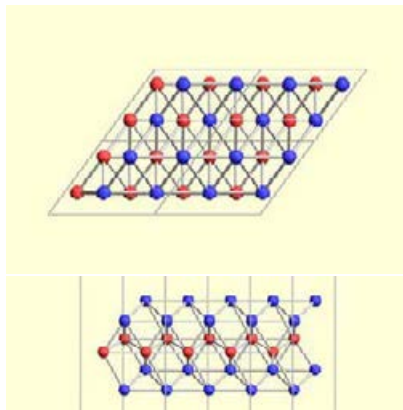

FAu<sub>2</sub> (H)

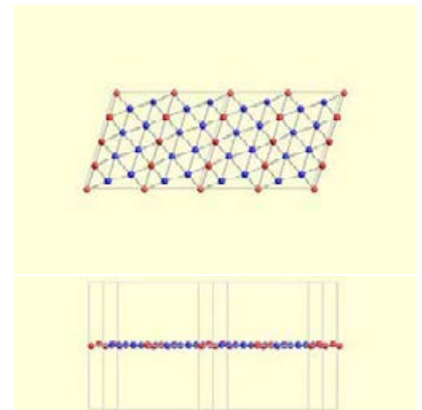

FAu<sub>2</sub> (P)



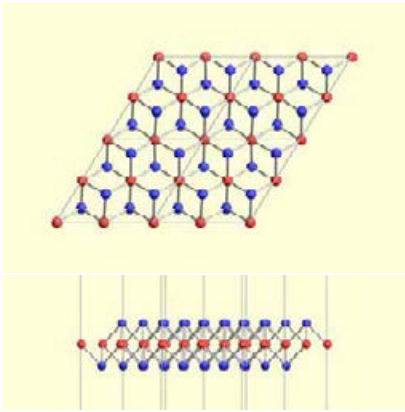

FTl<sub>2</sub> (T)

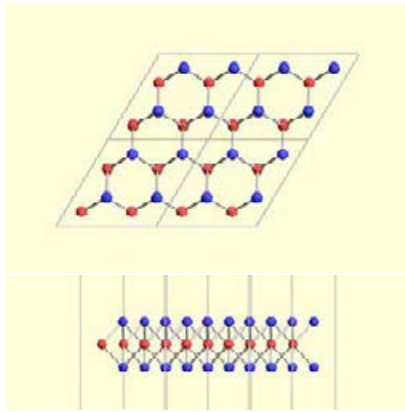

FTl<sub>2</sub> (H)

×

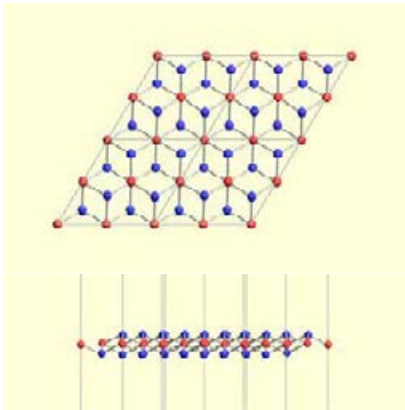

NaN<sub>2</sub> (T)

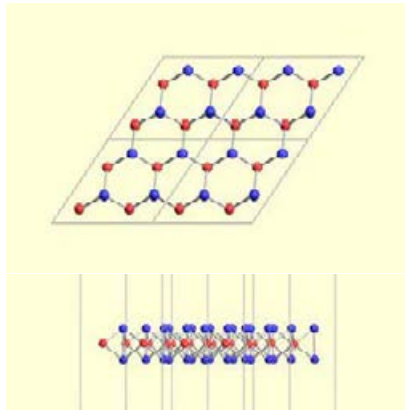

NaN<sub>2</sub> (H)

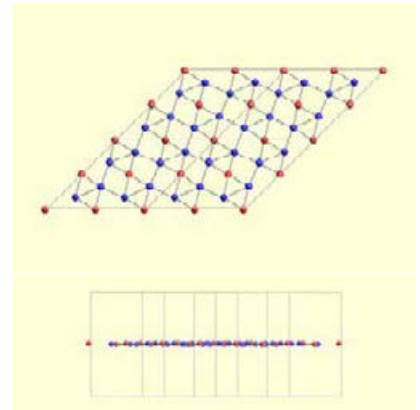

NaN<sub>2</sub> (P)

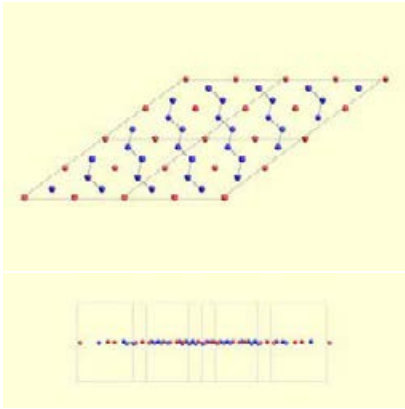

NaSi<sub>2</sub> (T)

×

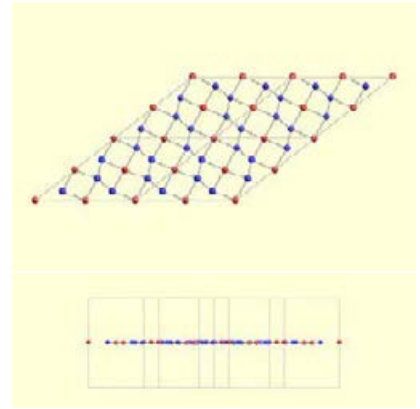

NaSi<sub>2</sub> (P)

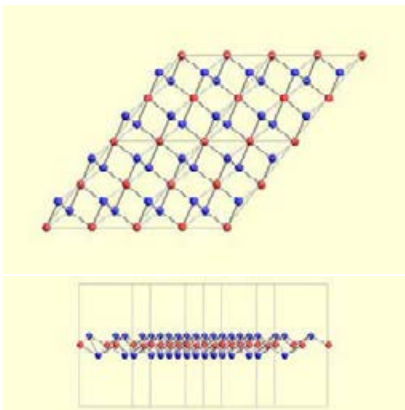

NaCl<sub>2</sub> (T)

×

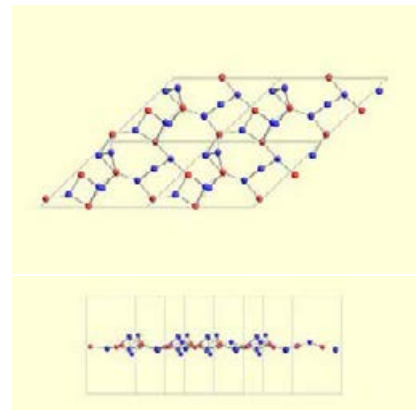

NaCl<sub>2</sub> (P)

×

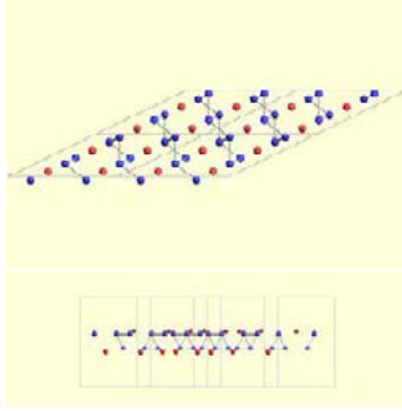

NaGe<sub>2</sub> (H)

×

×

×

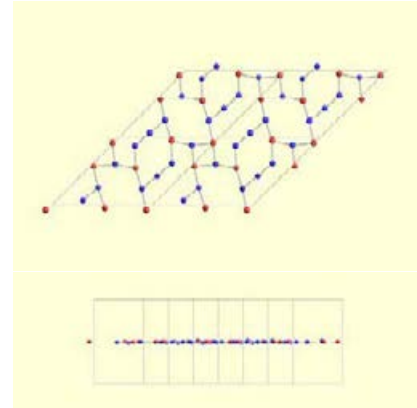

NaBr<sub>2</sub> (P)

×

×

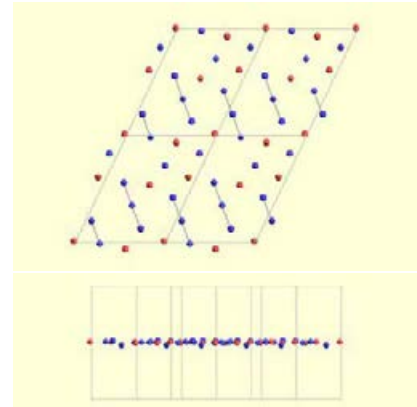

NaI<sub>2</sub> (P)

×

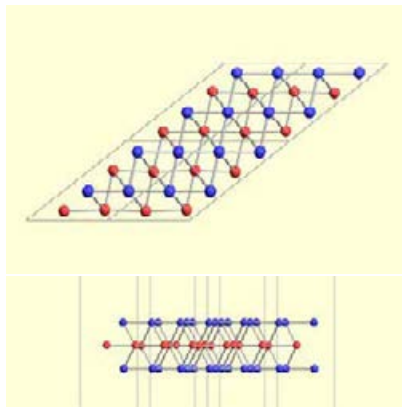

NaAu<sub>2</sub> (H)

×

×

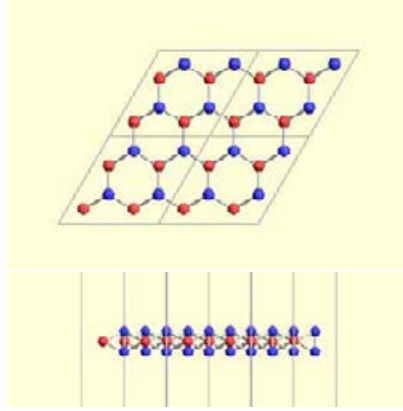

MgO<sub>2</sub> (H)

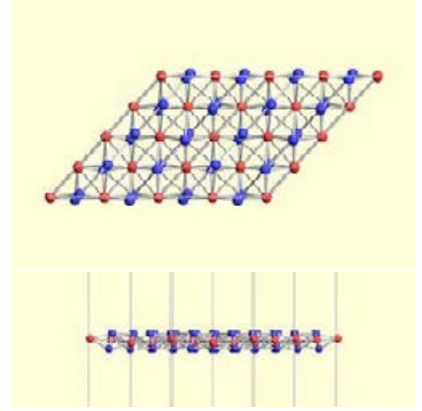

MgO<sub>2</sub> (P)

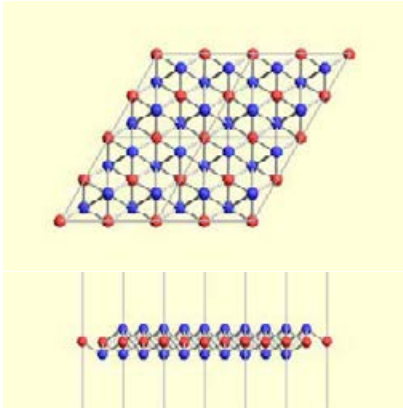

MgF<sub>2</sub> (T)

×

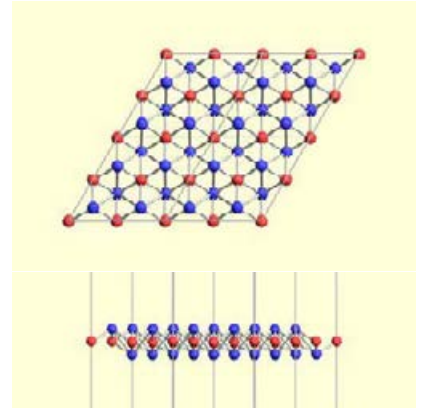

MgF<sub>2</sub> (P)

×

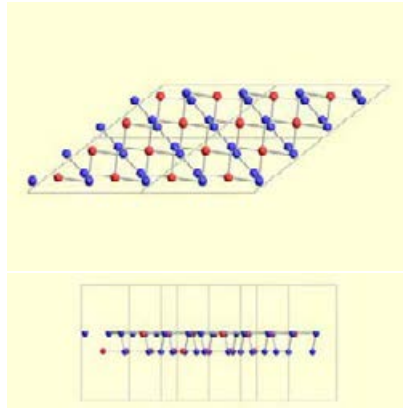

MgSi<sub>2</sub> (H)

×

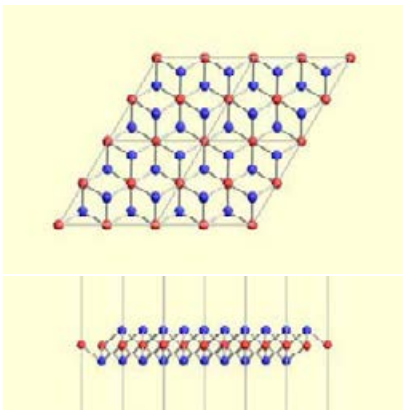

MgCl<sub>2</sub> (T)

×

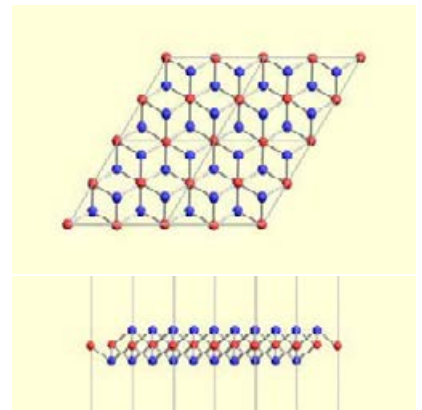

MgCl<sub>2</sub> (P)

×

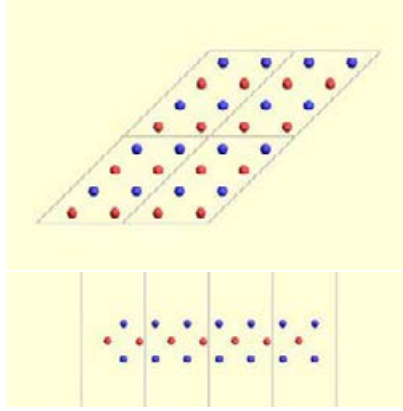

MgSc<sub>2</sub> (H)

×

×

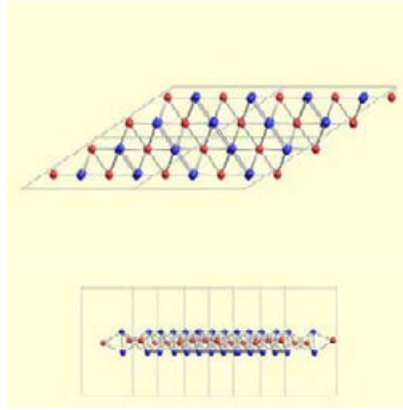

MgGe<sub>2</sub> (H)

×

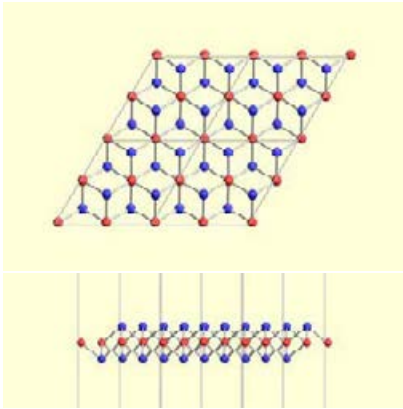

MgBr<sub>2</sub> (T)

×

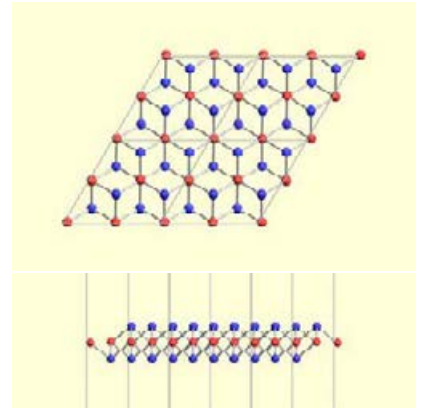

MgBr<sub>2</sub> (P)

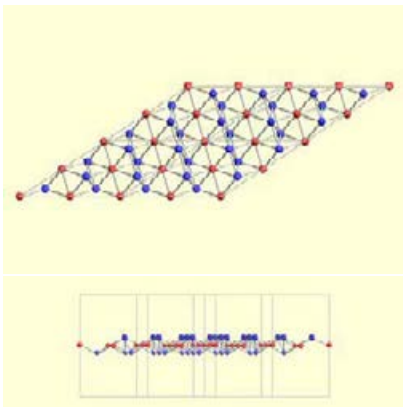

MgRh<sub>2</sub> (T)

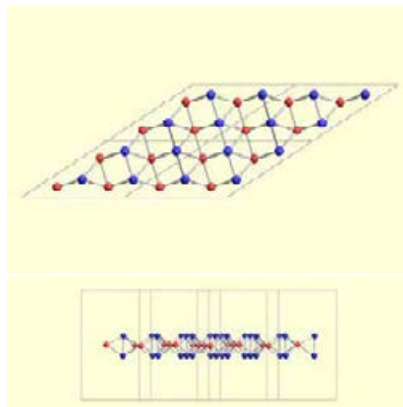

MgRh<sub>2</sub> (H)

×

×

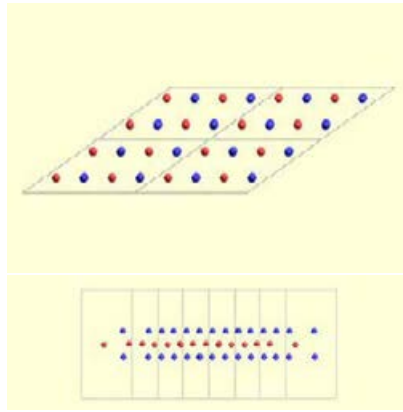

MgIn<sub>2</sub> (H)

×

×

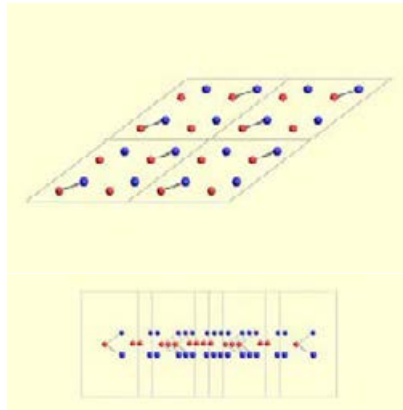

MgSn<sub>2</sub> (H)

×

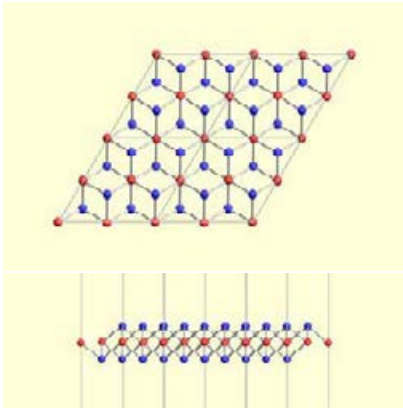

MgI<sub>2</sub> (T)

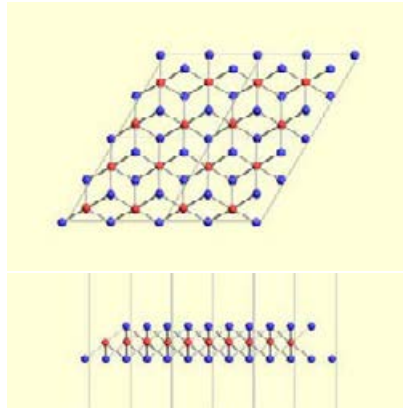

MgI<sub>2</sub> (H)

×

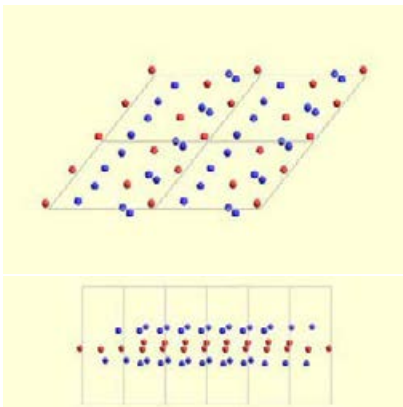

MgBa<sub>2</sub> (T)

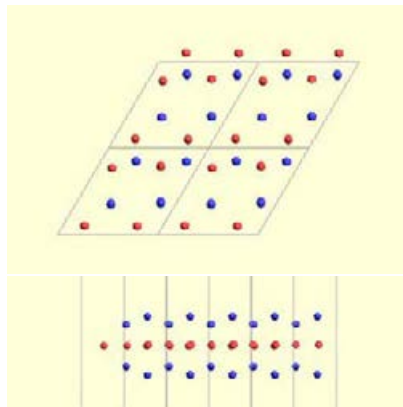

MgBa<sub>2</sub> (H)

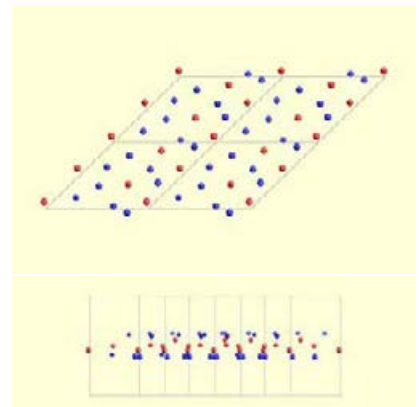

MgBa<sub>2</sub> (P)



×

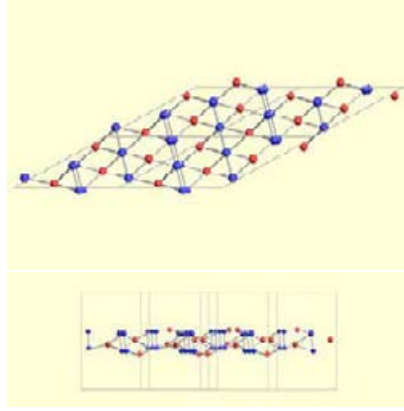

×

MgIr<sub>2</sub> (H)

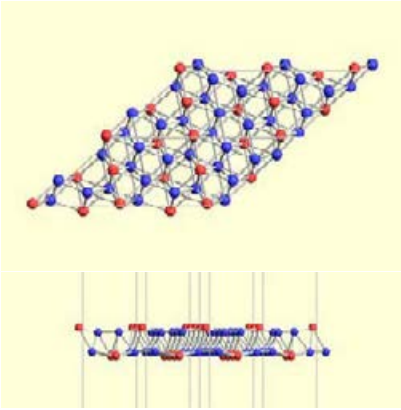

AlBe<sub>2</sub> (T)

×

×

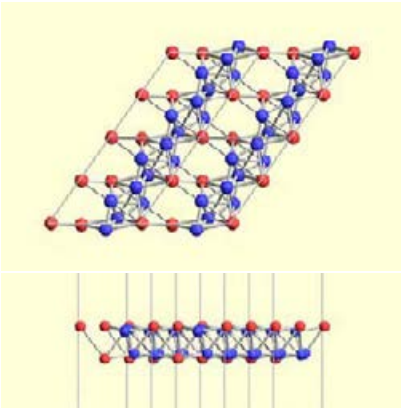

AlB<sub>2</sub> (T)

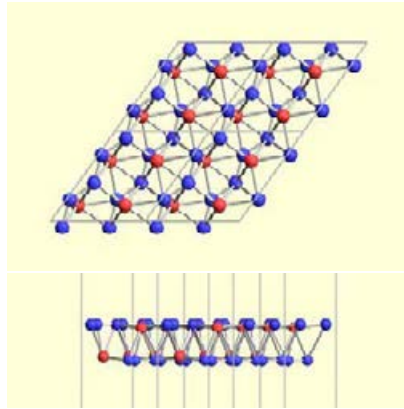

AlB<sub>2</sub> (H)

×

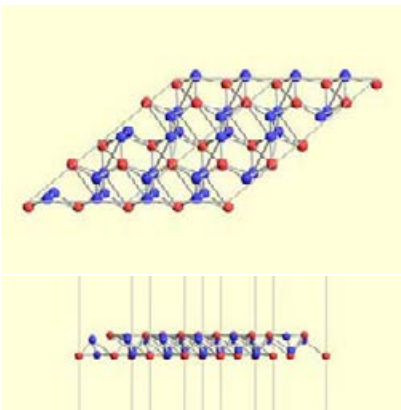

AlC<sub>2</sub> (T)

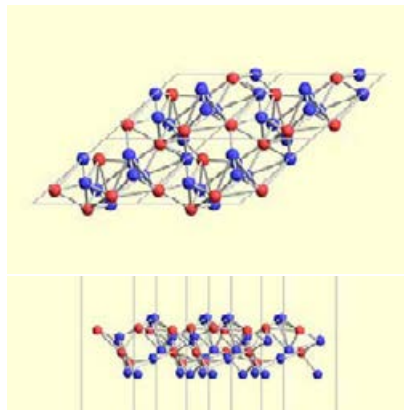

AlC<sub>2</sub> (H)

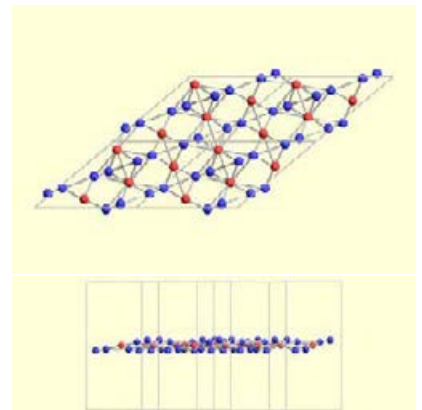

AlC<sub>2</sub> (P)



×

×

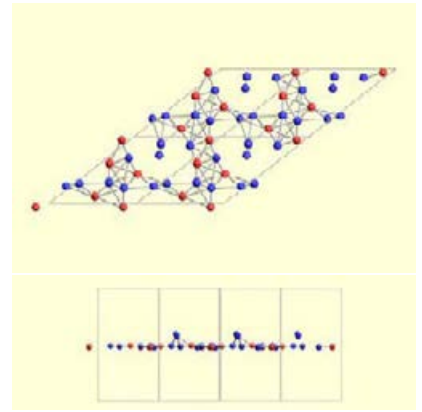

AlN<sub>2</sub> (P)

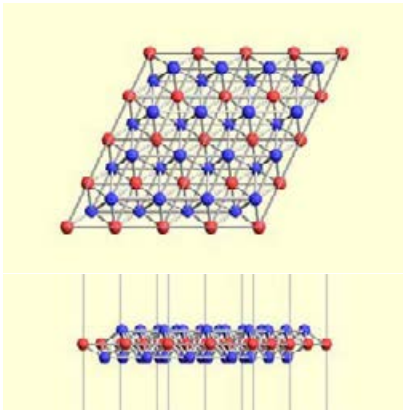

AlO<sub>2</sub> (T)

×

×

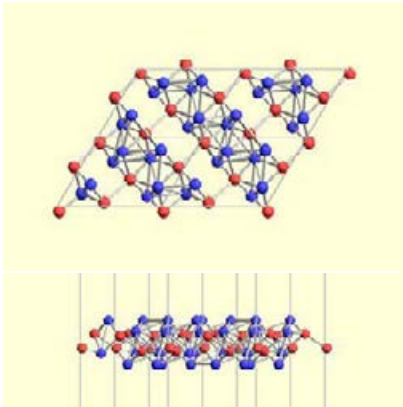

AlF<sub>2</sub> (T)

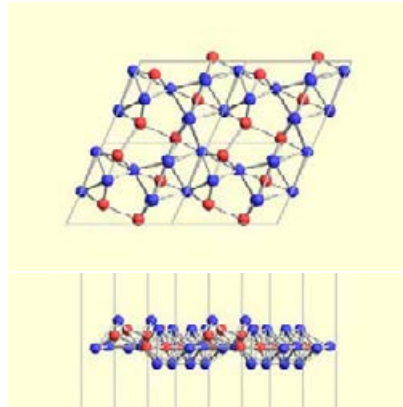

AlF<sub>2</sub> (H)

×

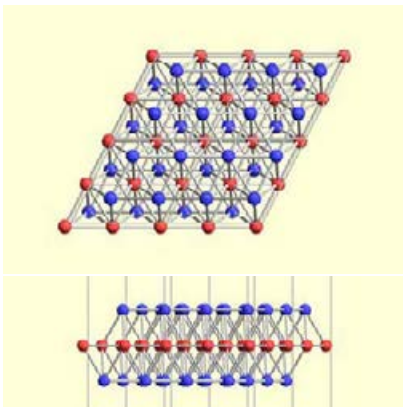

AlAl<sub>2</sub> (T)

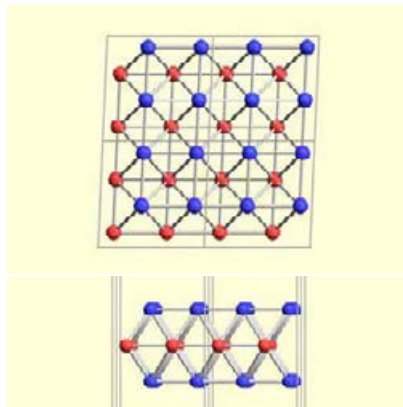

AlAl<sub>2</sub> (H)

×

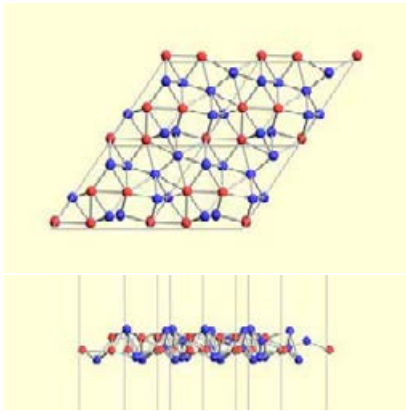

AlSi<sub>2</sub> (T)

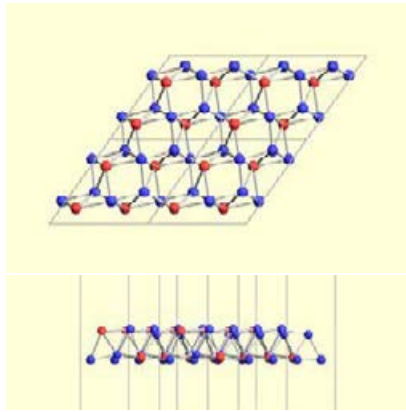

AlSi<sub>2</sub> (H)

×

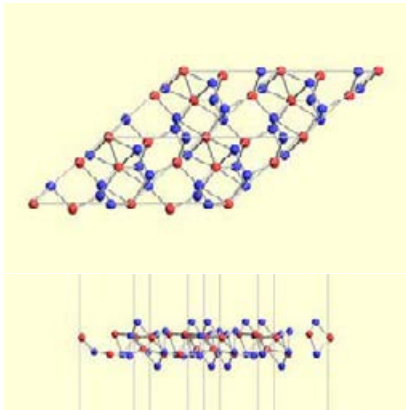

AlP<sub>2</sub> (T)

×

×

×

×

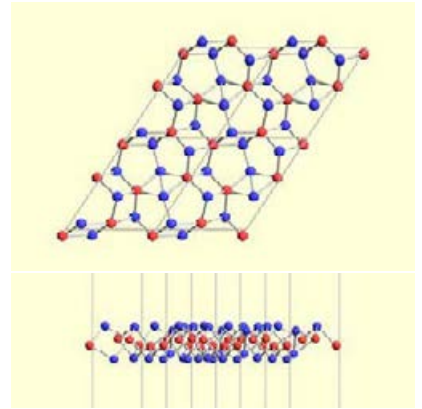

AlS<sub>2</sub> (P)

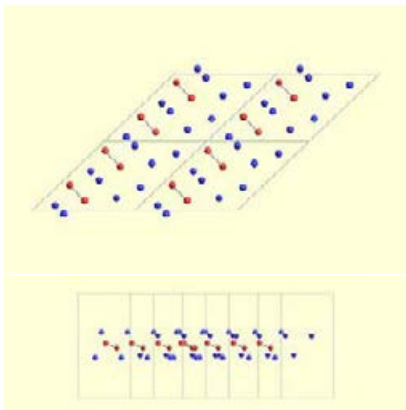

AlK<sub>2</sub> (T)

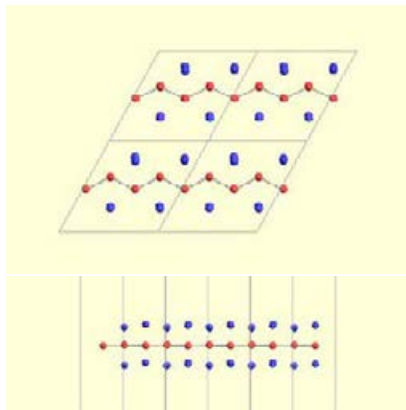

AlK<sub>2</sub> (H)

×

×

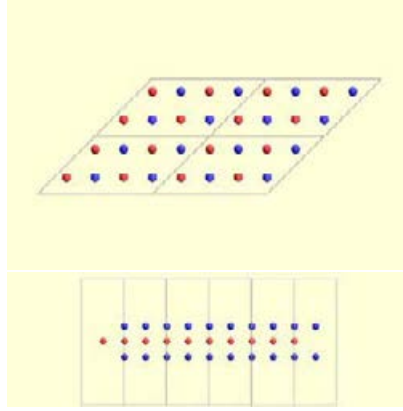

$\text{AlCa}_2$  (H)

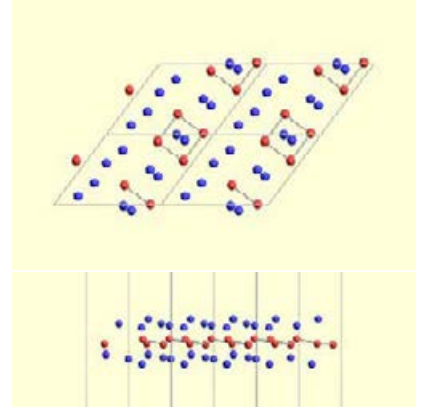

$\text{AlCa}_2$  (P)

×

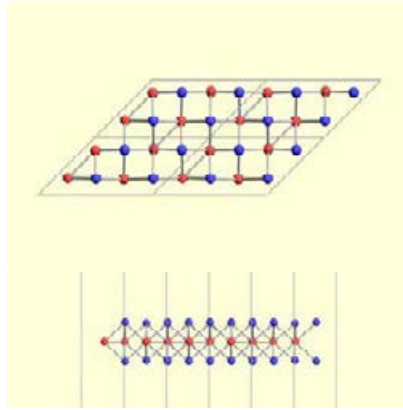

$\text{AlSc}_2$  (H)

×

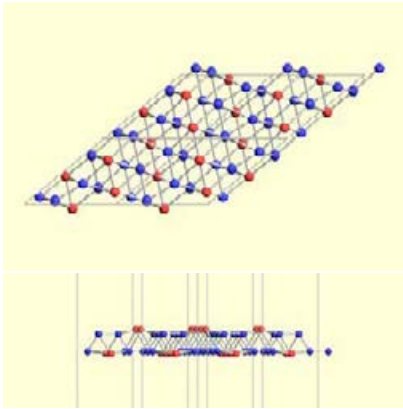

$\text{AlCr}_2$  (T)

×

×

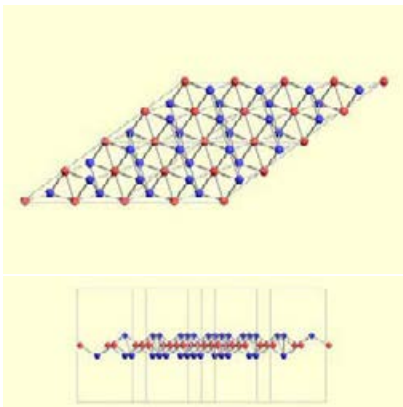

$\text{AlGe}_2$  (T)

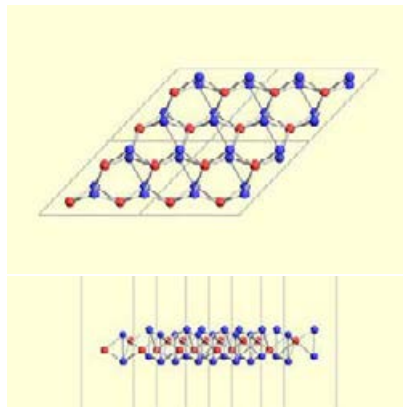

$\text{AlGe}_2$  (H)

×

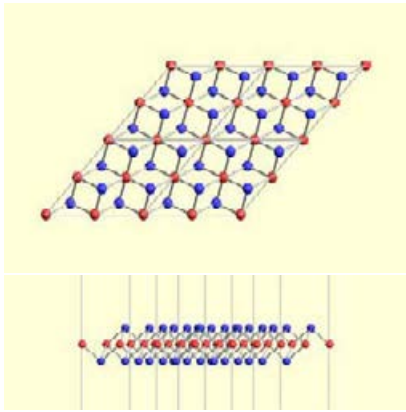

AlSe<sub>2</sub> (T)

×

×

×

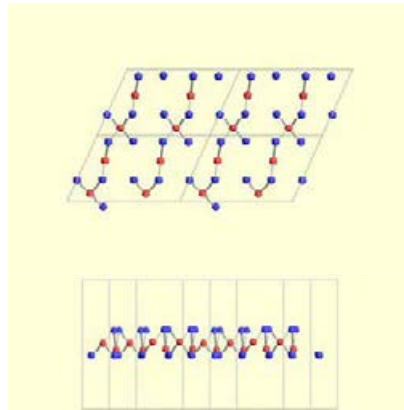

AlBr<sub>2</sub> (H)

×

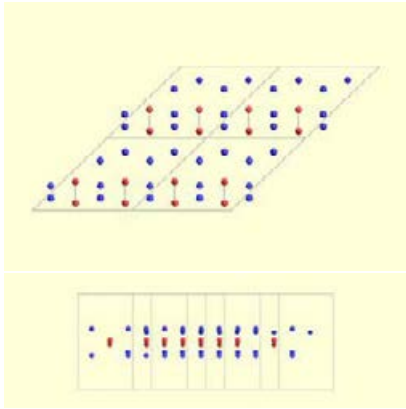

AlRb<sub>2</sub> (T)

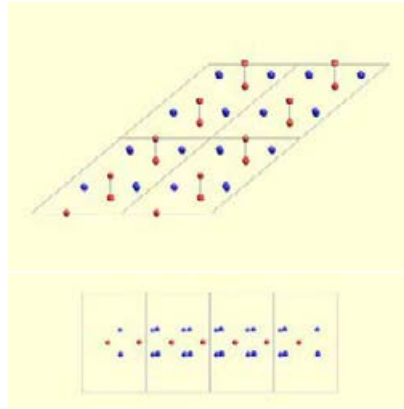

AlRb<sub>2</sub> (H)

×

×

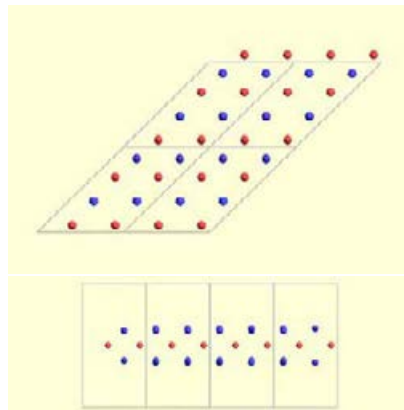

AlSr<sub>2</sub> (H)

×

×

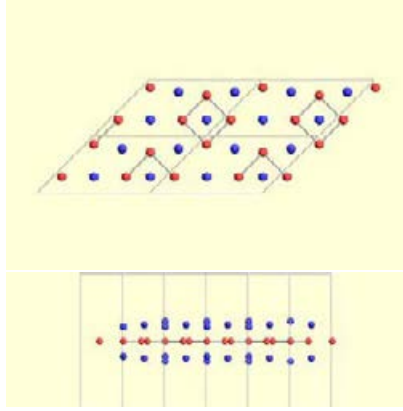

$\text{AlY}_2$  (H)

×

×

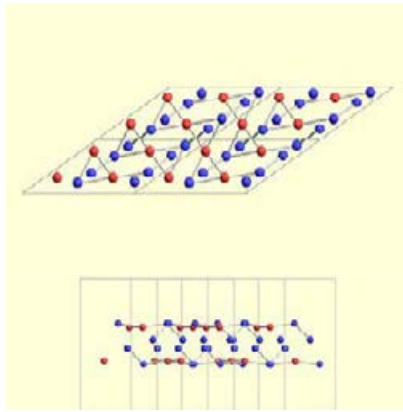

$\text{AlZr}_2$  (H)

×

×

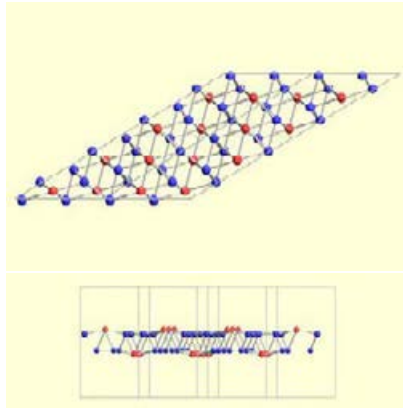

$\text{AlMo}_2$  (H)

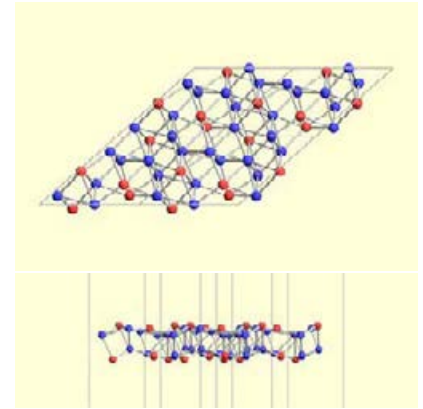

$\text{AlMo}_2$  (P)

×

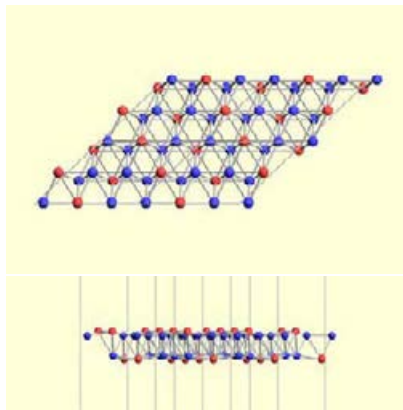

$\text{AlRu}_2$  (H)

×

×

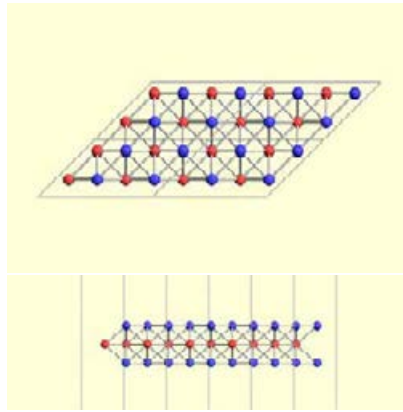

AlRh<sub>2</sub> (H)

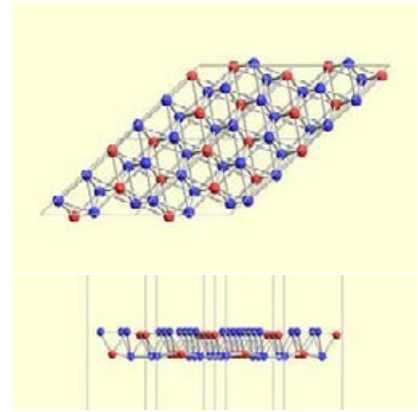

AlRh<sub>2</sub> (P)

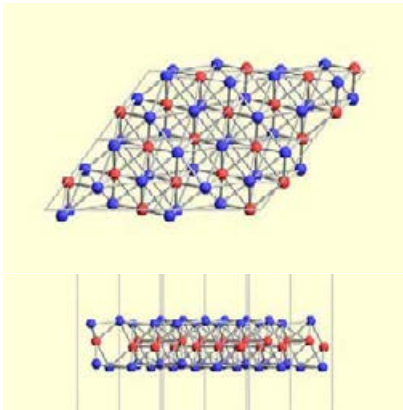

AlPd<sub>2</sub> (T)

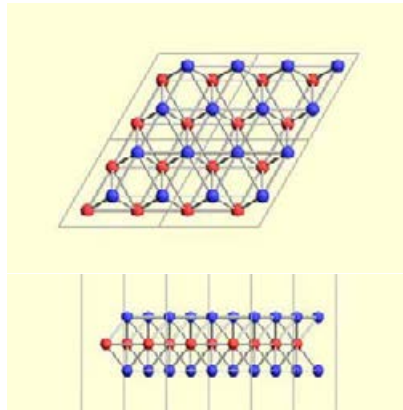

AlPd<sub>2</sub> (H)

×

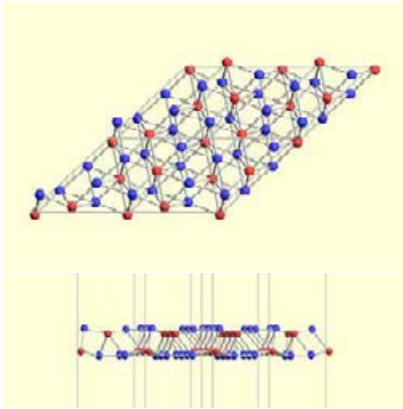

AlAg<sub>2</sub> (T)

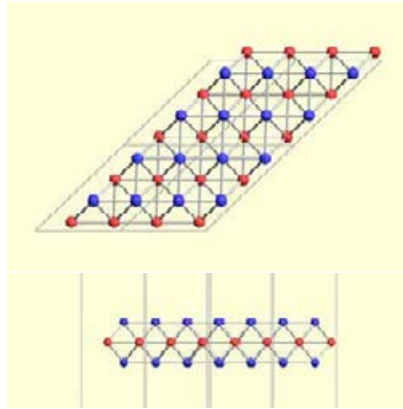

AlAg<sub>2</sub> (H)

×

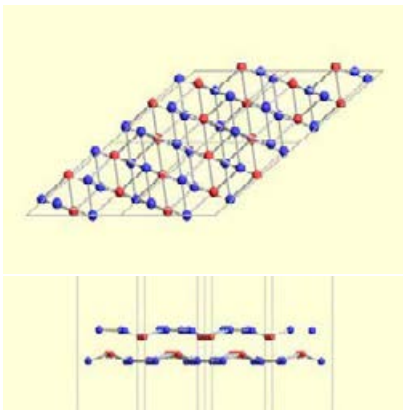

AlCd<sub>2</sub> (T)

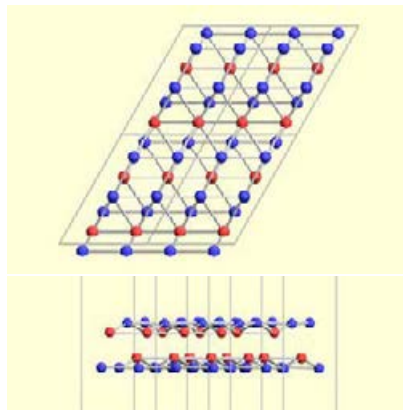

AlCd<sub>2</sub> (H)

×



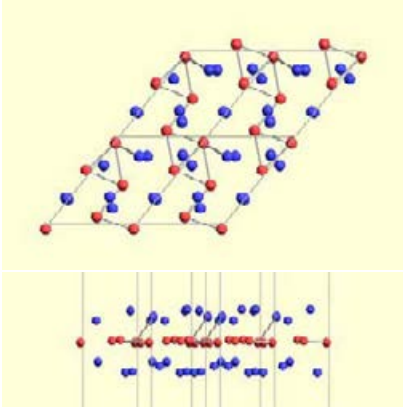

AlIn<sub>2</sub> (T)

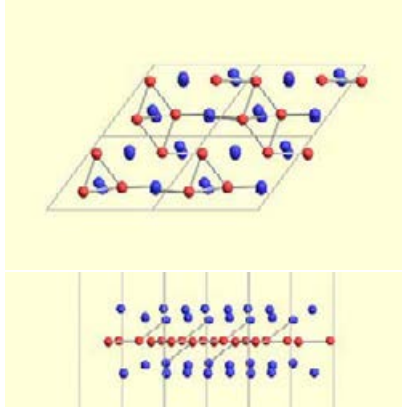

AlIn<sub>2</sub> (H)

×

×

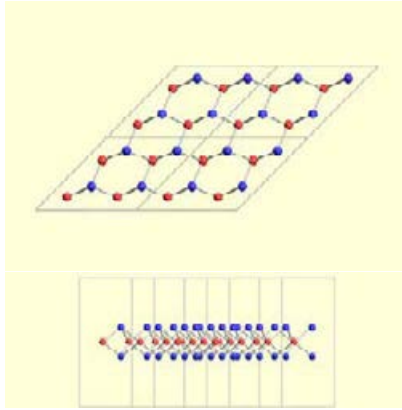

AlSn<sub>2</sub> (H)

×

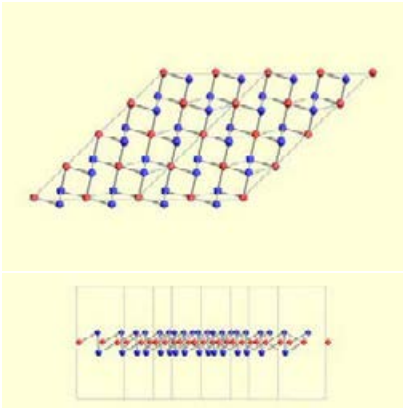

AlSb<sub>2</sub> (T)

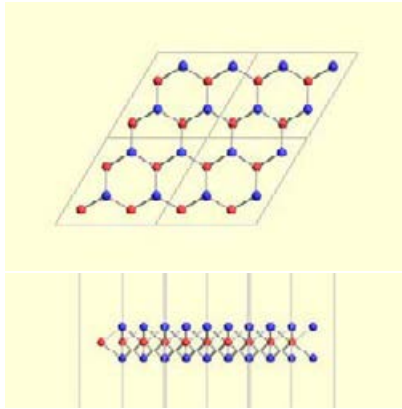

AlSb<sub>2</sub> (H)

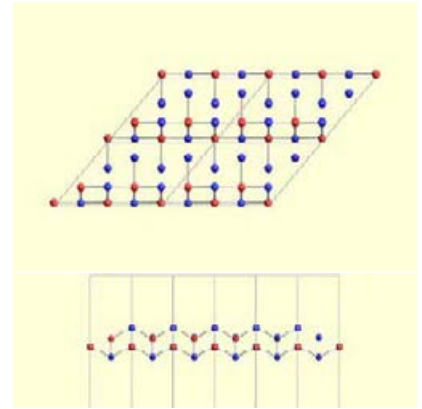

AlSb<sub>2</sub> (P)

×

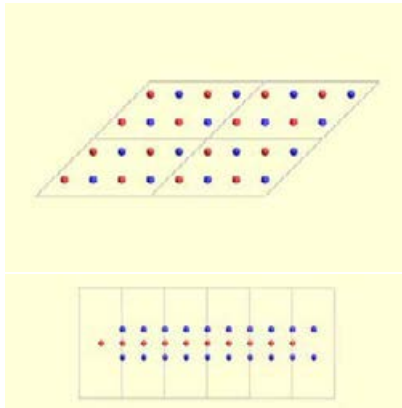

AlBa<sub>2</sub> (H)

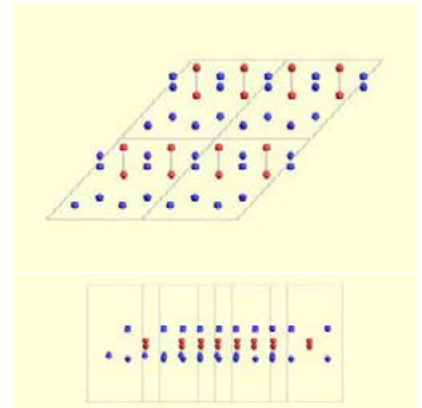

AlBa<sub>2</sub> (P)

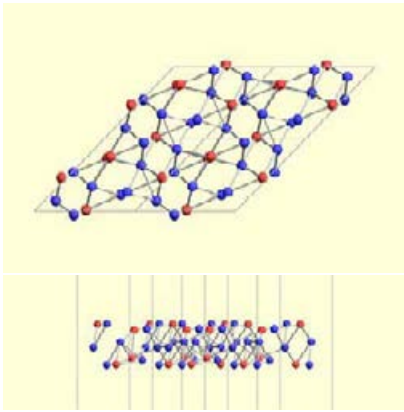

AlHf<sub>2</sub> (T)

×

×

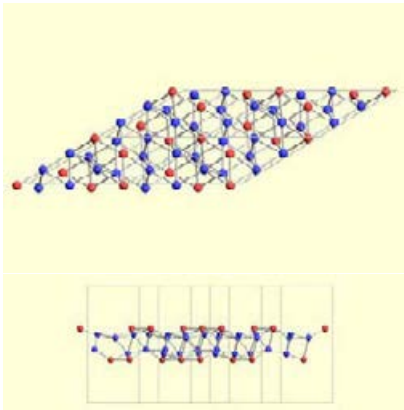

AlW<sub>2</sub> (T)

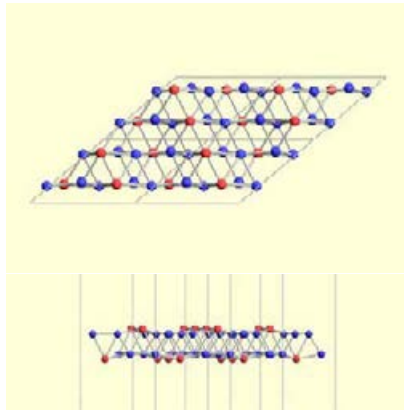

AlW<sub>2</sub> (H)

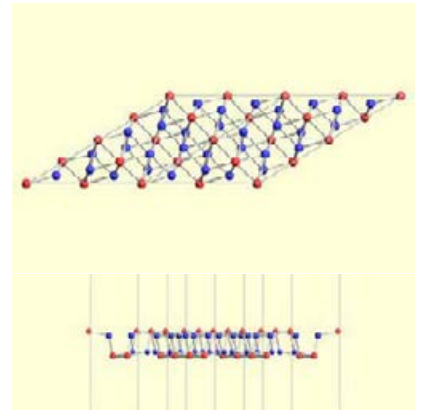

AlW<sub>2</sub> (P)

×

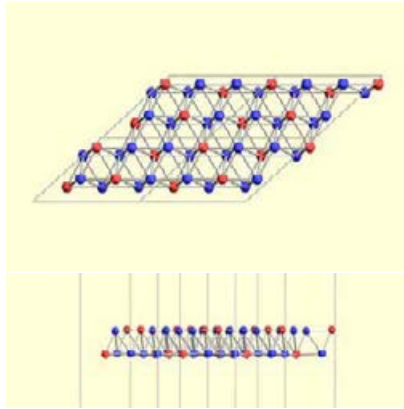

AlIr<sub>2</sub> (H)

×

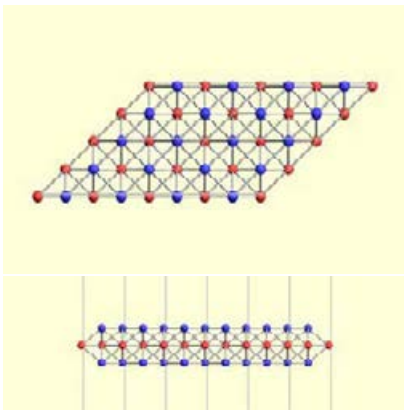

AlPt<sub>2</sub> (T)

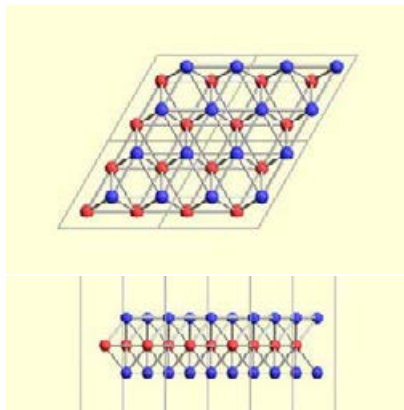

AlPt<sub>2</sub> (H)

×

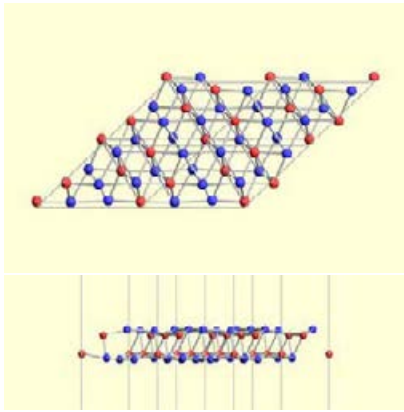

AlAu<sub>2</sub> (T)

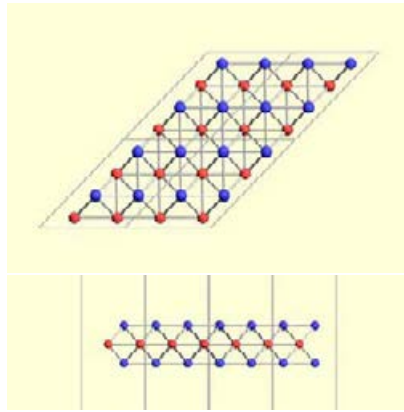

AlAu<sub>2</sub> (H)

×

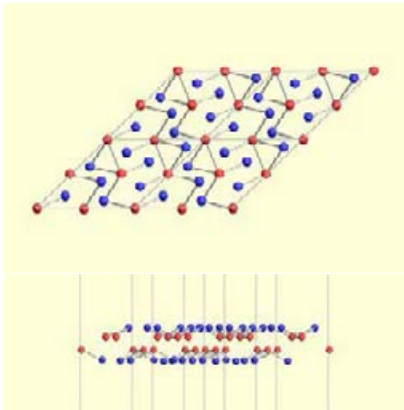

AlHg<sub>2</sub> (T)

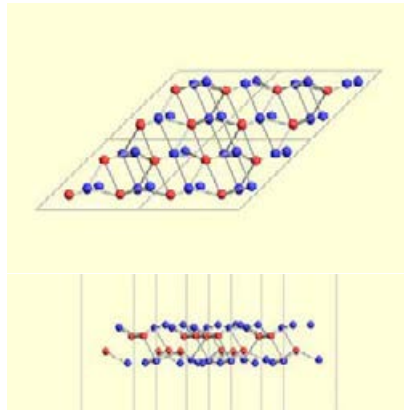

AlHg<sub>2</sub> (H)

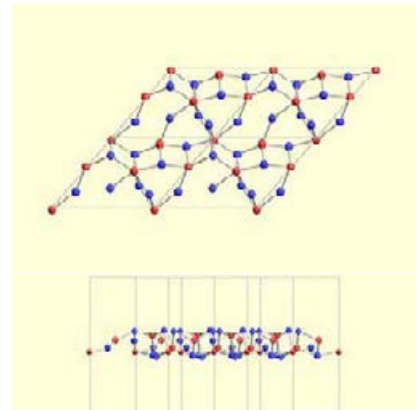

AlHg<sub>2</sub> (P)

×

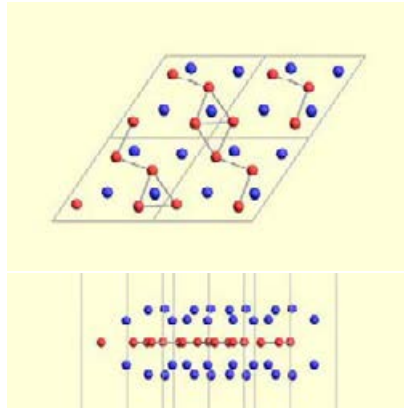

AlTl<sub>2</sub> (H)

×

×

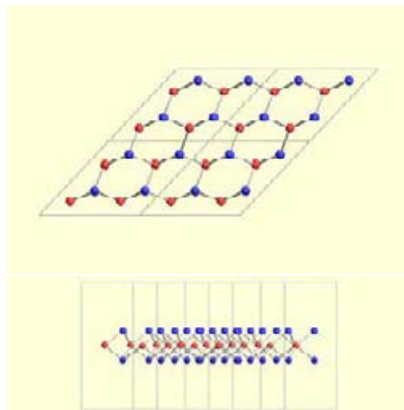

AlPb<sub>2</sub> (H)

×

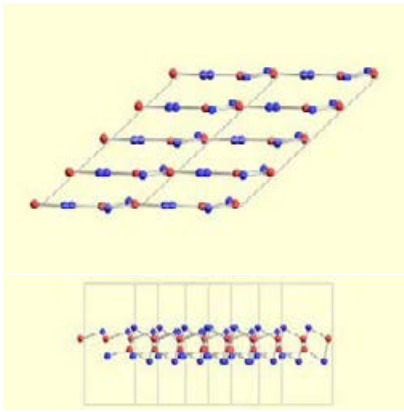

AlBi<sub>2</sub> (T)

×

×

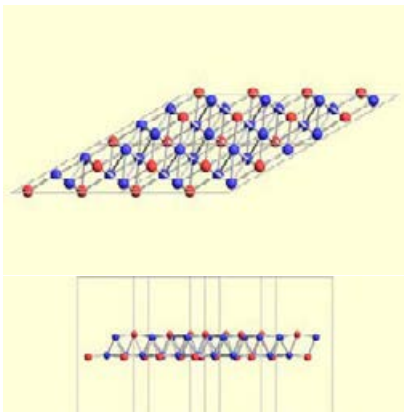

SiBe<sub>2</sub> (T)

×

×

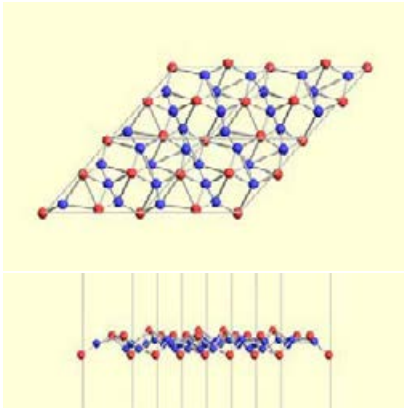

SiB<sub>2</sub> (T)

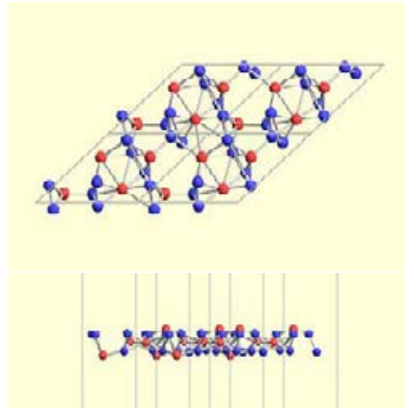

SiB<sub>2</sub> (H)

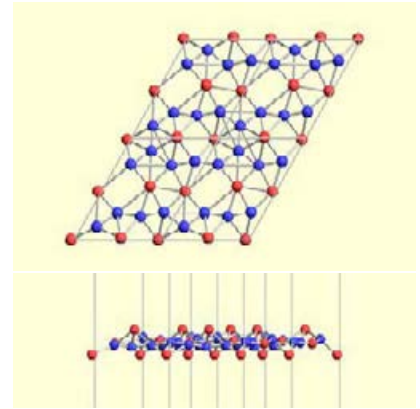

SiB<sub>2</sub> (P)

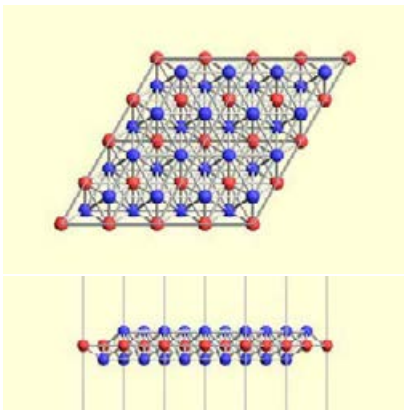

SiO<sub>2</sub> (T)

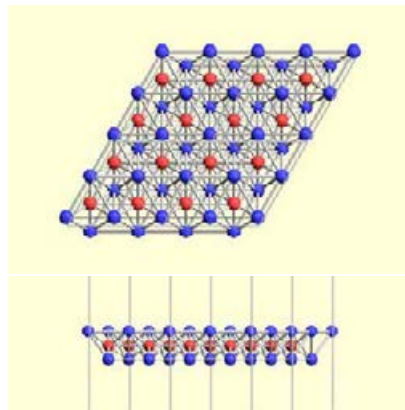

SiO<sub>2</sub> (H)

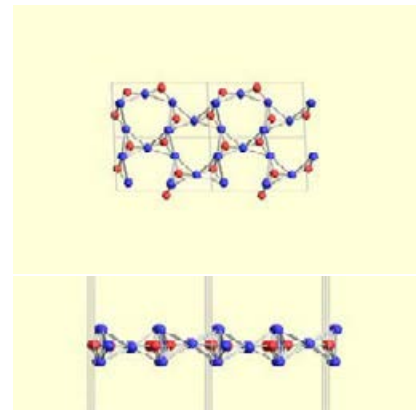

SiO<sub>2</sub> (P)

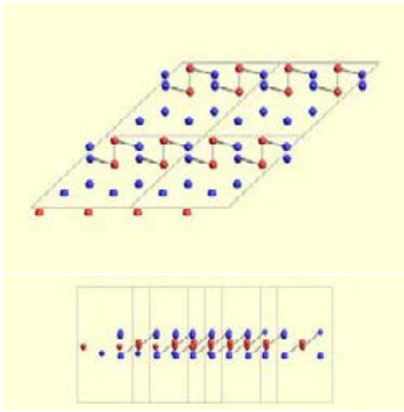

SiNa<sub>2</sub> (T)

×

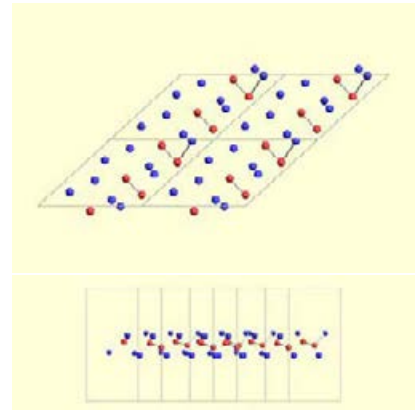

SiNa<sub>2</sub> (P)

×

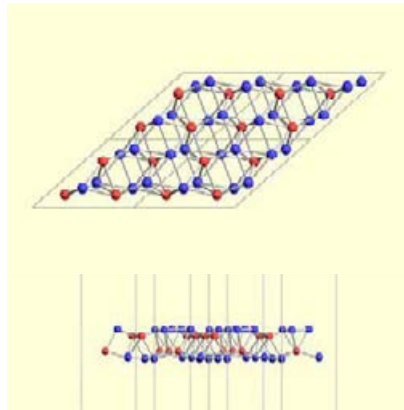

SiAl<sub>2</sub> (H)

×

×

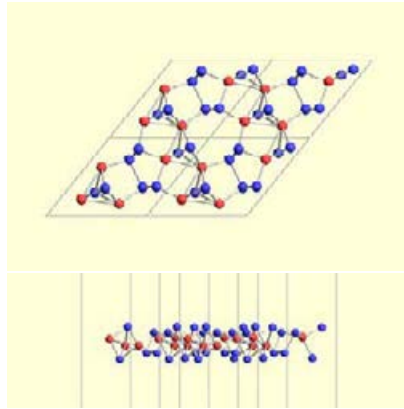

SiP<sub>2</sub> (H)

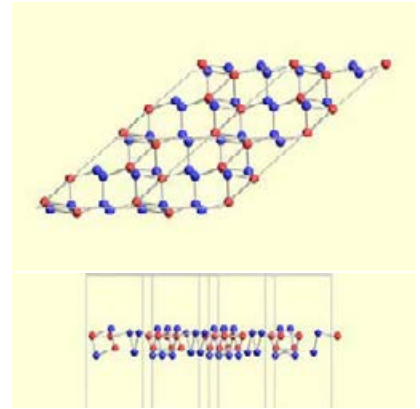

SiP<sub>2</sub> (P)

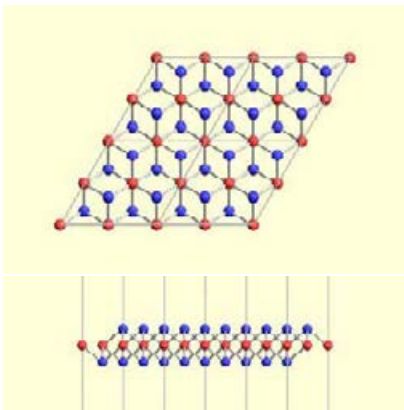

SiS<sub>2</sub> (T)

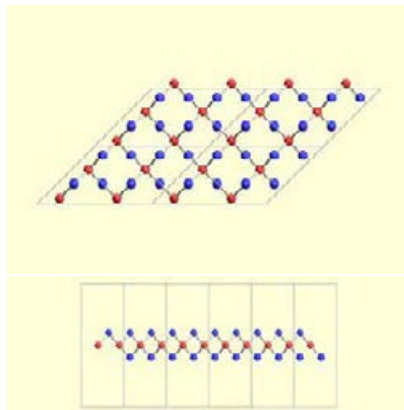

SiS<sub>2</sub> (H)

×



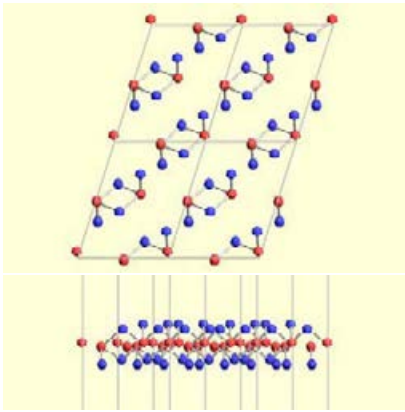

SiCl<sub>2</sub> (T)

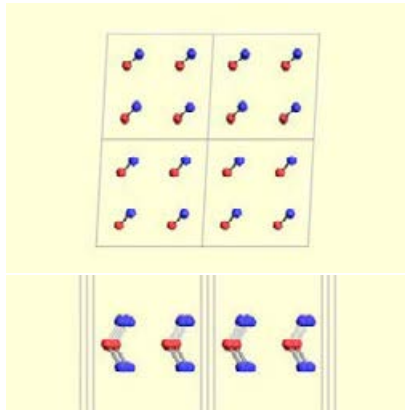

SiCl<sub>2</sub> (H)

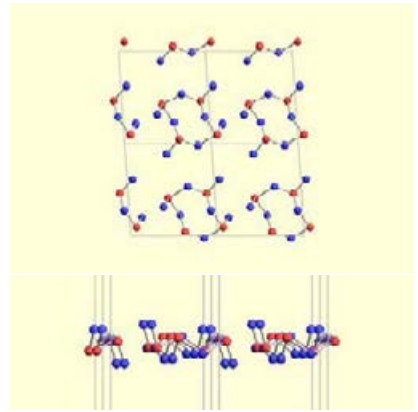

SiCl<sub>2</sub> (P)

×

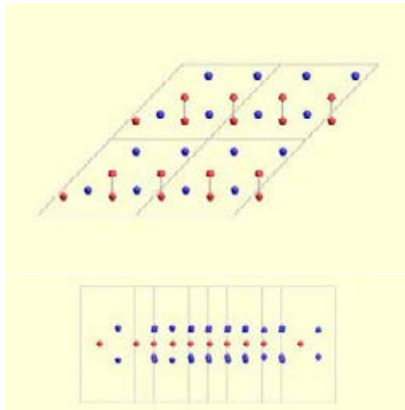

SiK<sub>2</sub> (H)

×

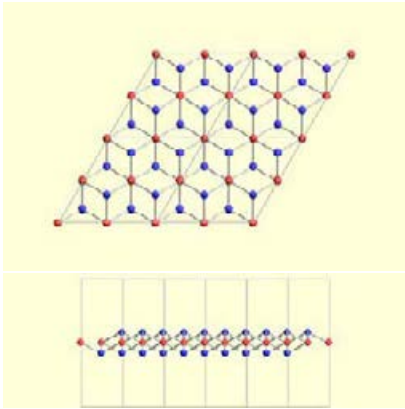

SiCa<sub>2</sub> (T)

×

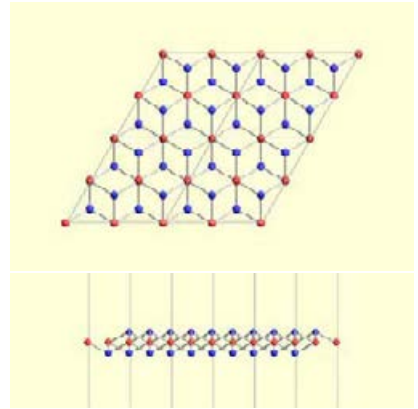

SiCa<sub>2</sub> (P)

×

×

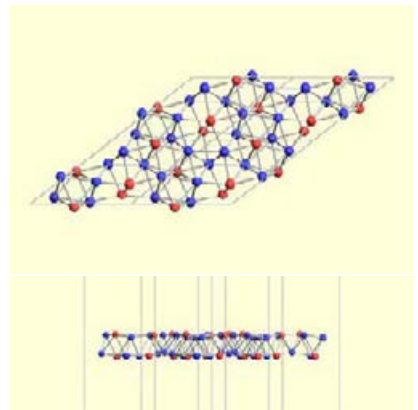

SiTi<sub>2</sub> (P)

×

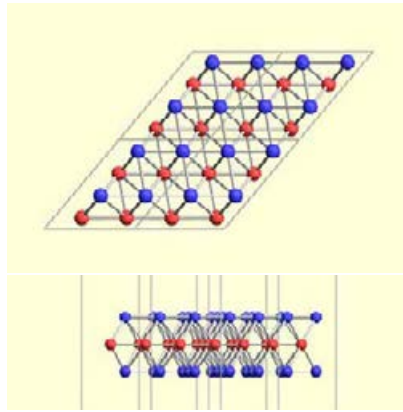

$\text{SiCr}_2$  (H)

×

×

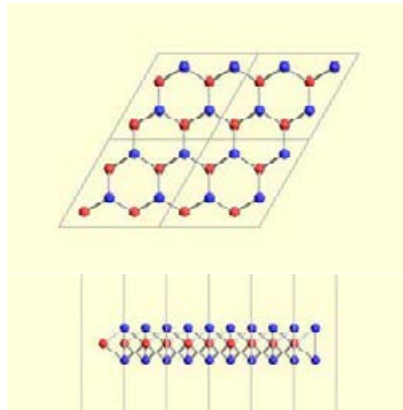

$\text{SiGe}_2$  (H)

×

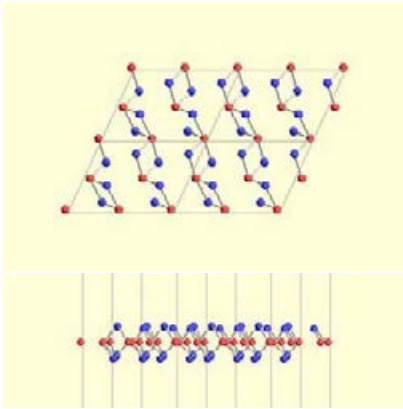

$\text{SiBr}_2$  (T)

×

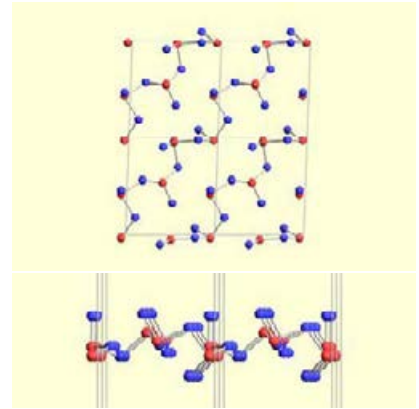

$\text{SiBr}_2$  (P)

×

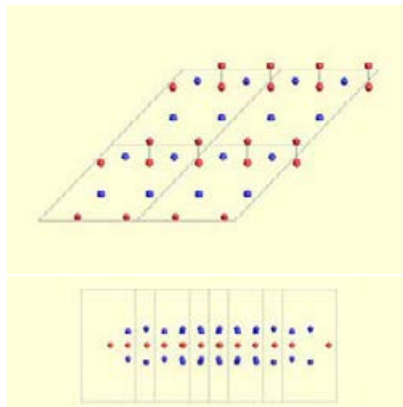

$\text{SiRb}_2$  (H)

×

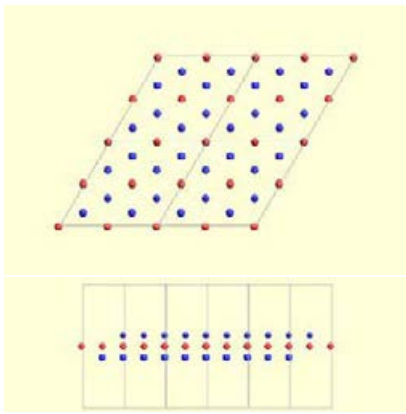

SiSr<sub>2</sub> (T)

×

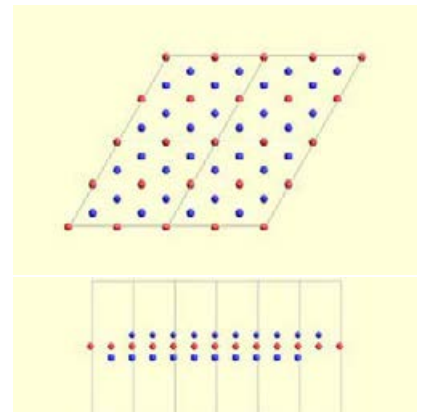

SiSr<sub>2</sub> (P)

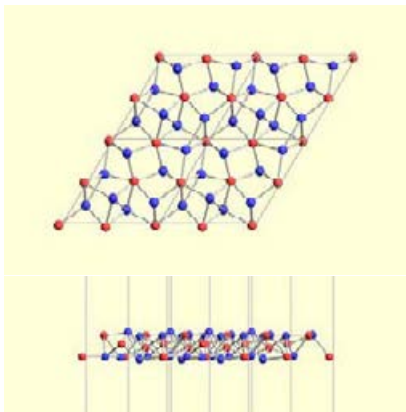

SiZr<sub>2</sub> (T)

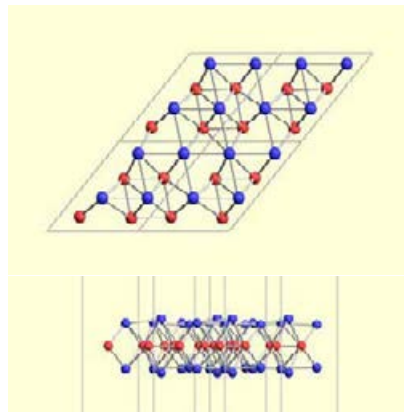

SiZr<sub>2</sub> (H)

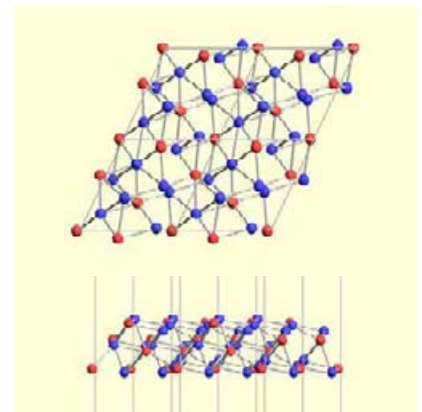

SiZr<sub>2</sub> (P)

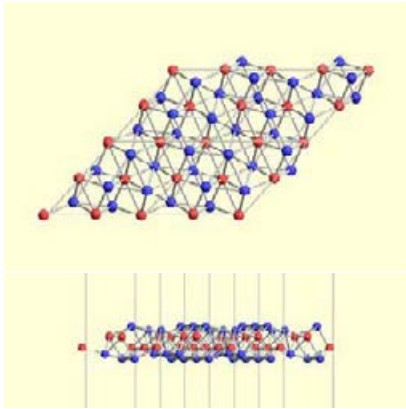

SiPd<sub>2</sub> (T)

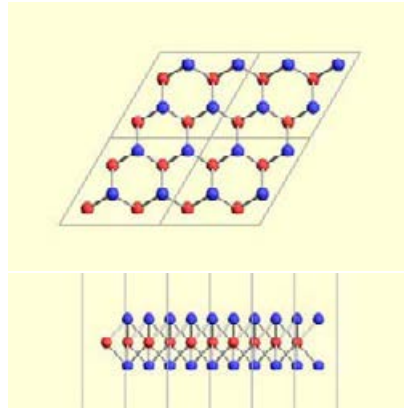

SiPd<sub>2</sub> (H)

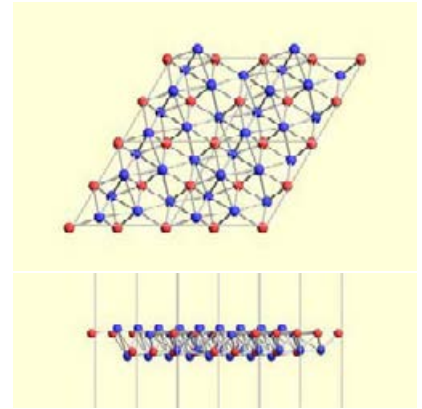

SiPd<sub>2</sub> (P)

×

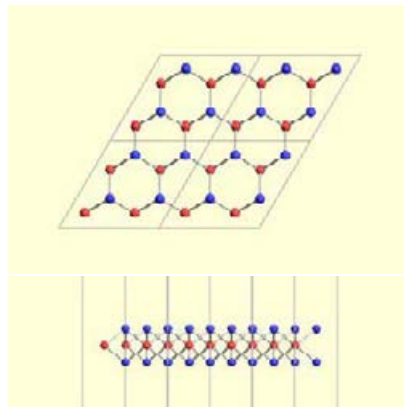

SiSn<sub>2</sub> (H)

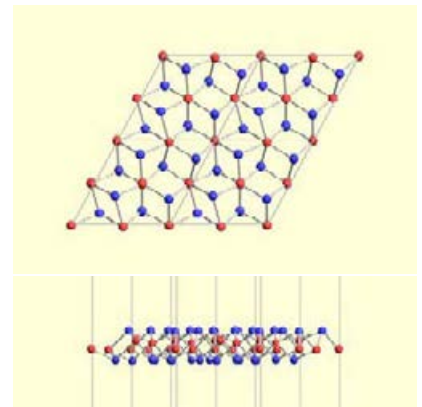

SiSn<sub>2</sub> (P)

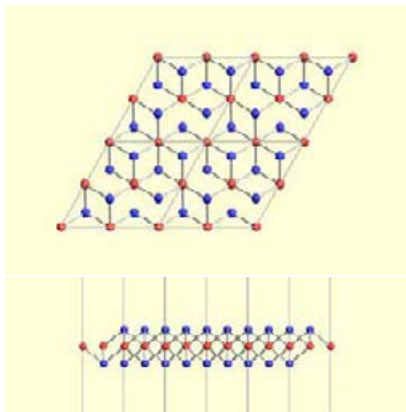

SiI<sub>2</sub> (T)

×

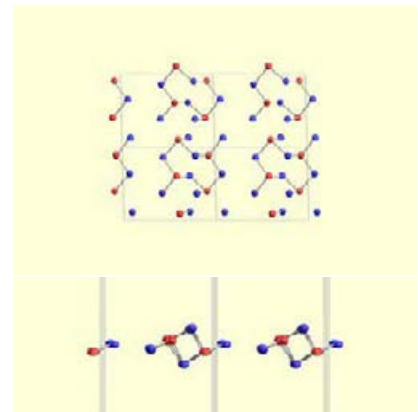

SiI<sub>2</sub> (P)

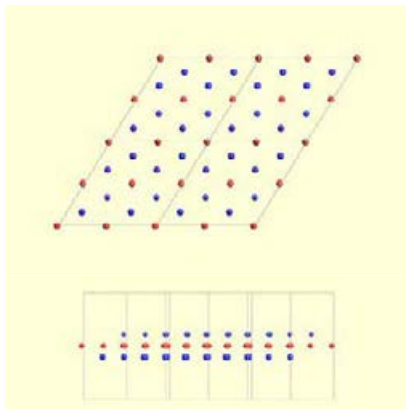

SiCs<sub>2</sub> (T)

×

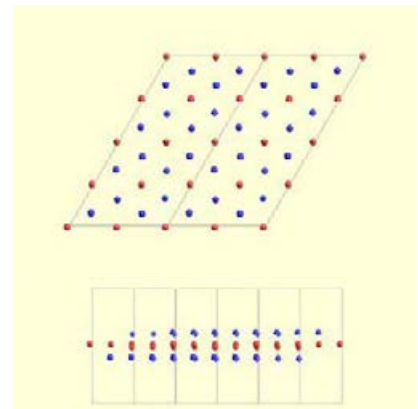

SiCs<sub>2</sub> (P)

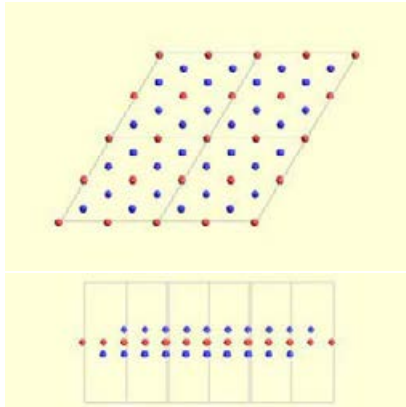

SiBa<sub>2</sub> (T)

×

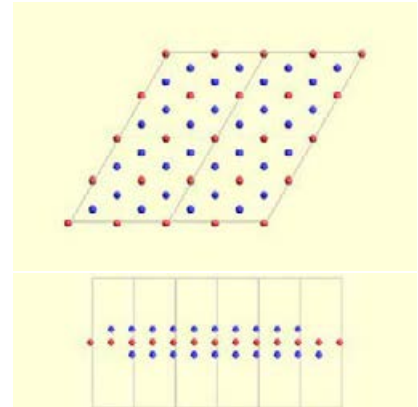

SiBa<sub>2</sub> (P)

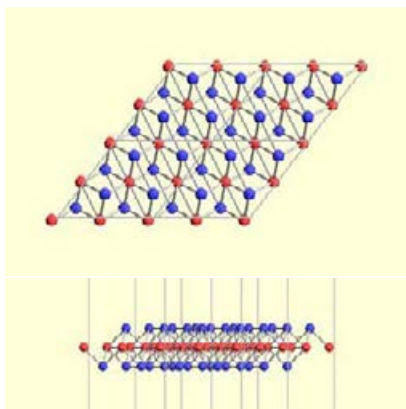

SiPt<sub>2</sub> (T)

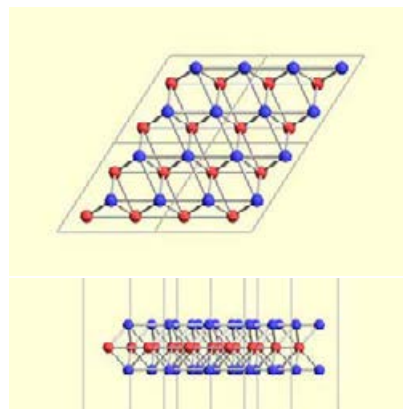

SiPt<sub>2</sub> (H)

×

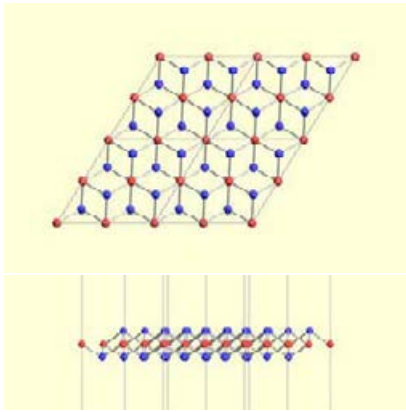

SiPb<sub>2</sub> (T)

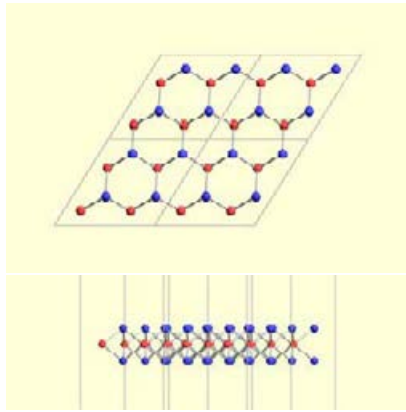

SiPb<sub>2</sub> (H)

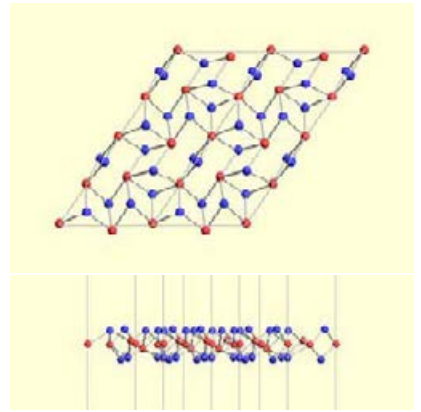

SiPb<sub>2</sub> (P)

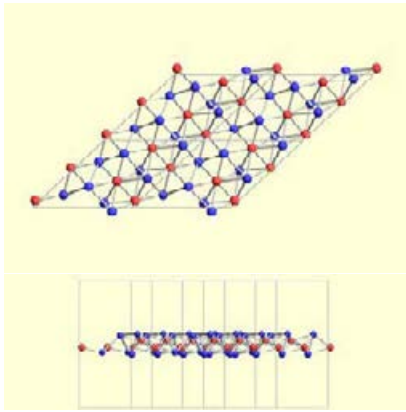

PLi<sub>2</sub> (T)

×

×

×

×

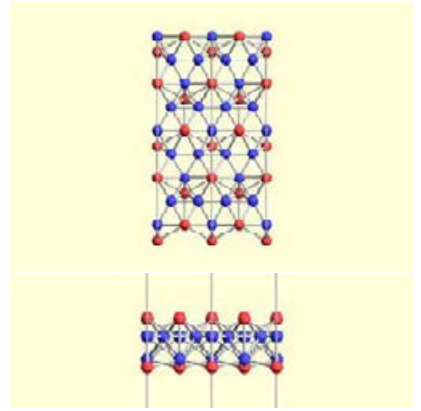

PBe<sub>2</sub> (P)

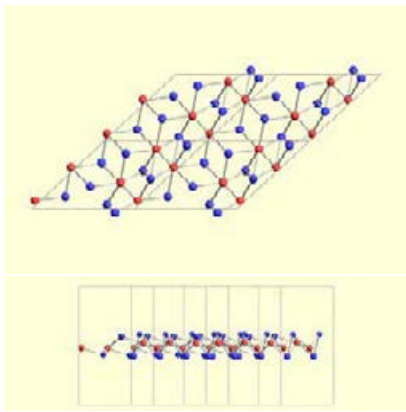

PNa<sub>2</sub> (T)

×

×



×

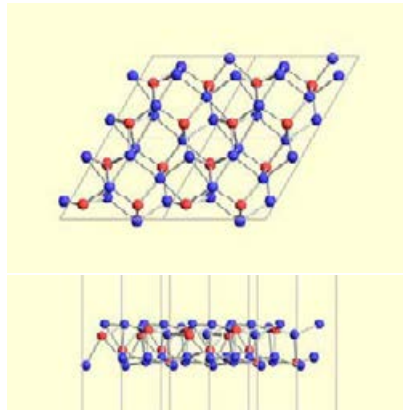

PA<sub>12</sub> (H)

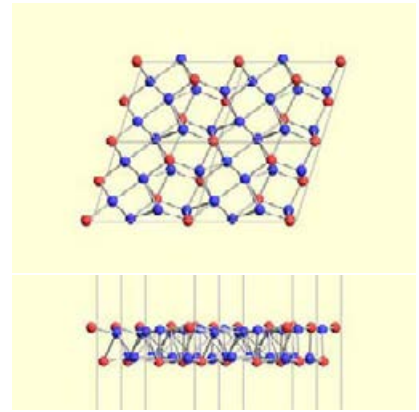

PA<sub>12</sub> (P)

×

×

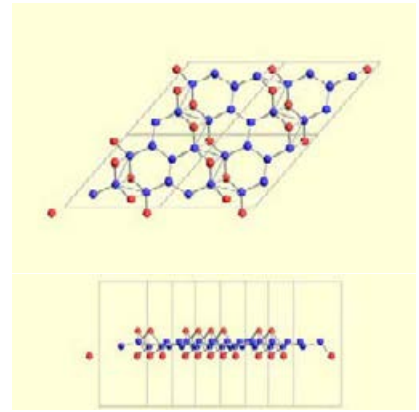

PSi<sub>2</sub> (P)

×

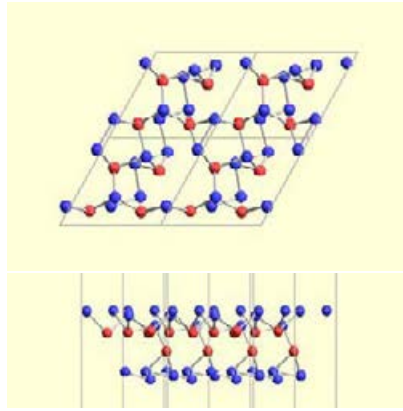

PP<sub>2</sub> (H)

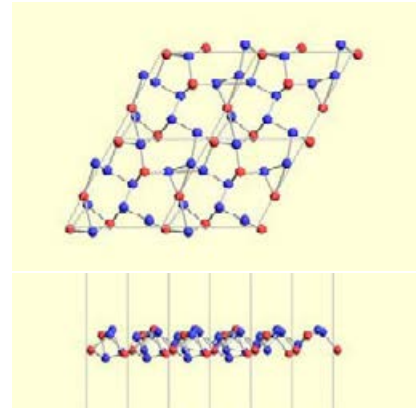

PP<sub>2</sub> (P)

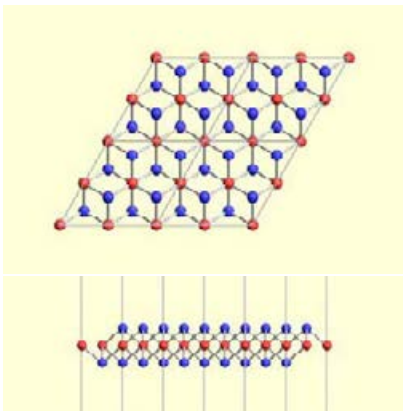

PS<sub>2</sub> (T)

×

×

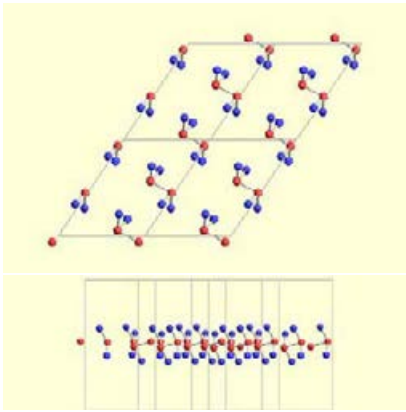

PCl<sub>2</sub> (T)

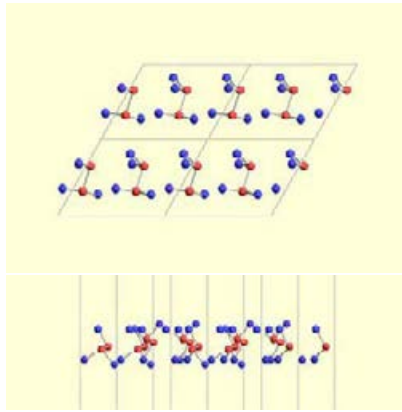

PCl<sub>2</sub> (H)

×

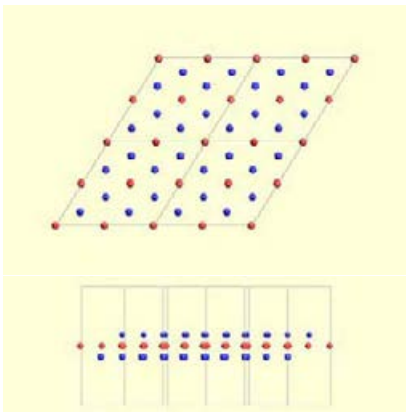

PK<sub>2</sub> (T)

×

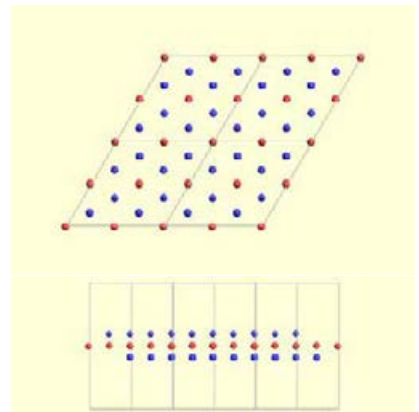

PK<sub>2</sub> (P)

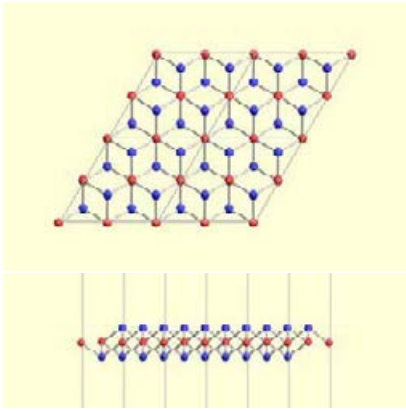

PCa<sub>2</sub> (T)

×

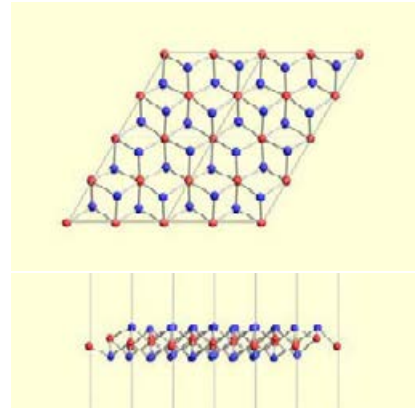

PCa<sub>2</sub> (P)

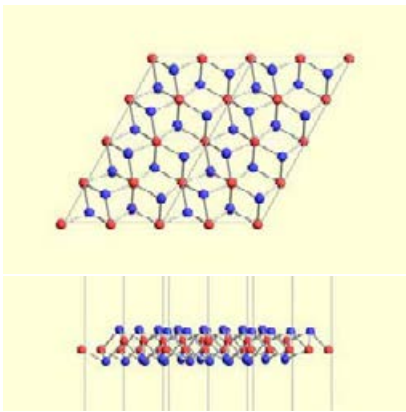

PSc<sub>2</sub> (T)

×

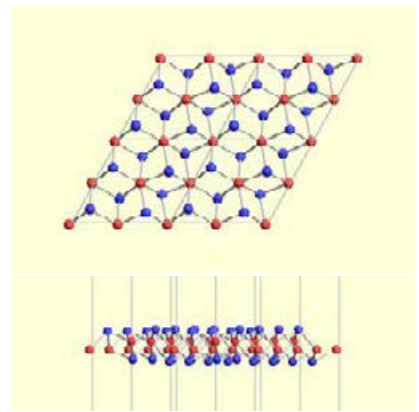

PSc<sub>2</sub> (P)

×

×

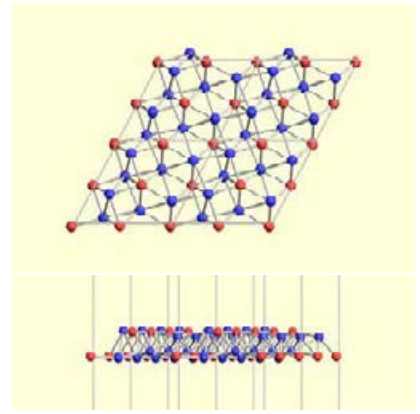

$\text{PTi}_2$  (P)

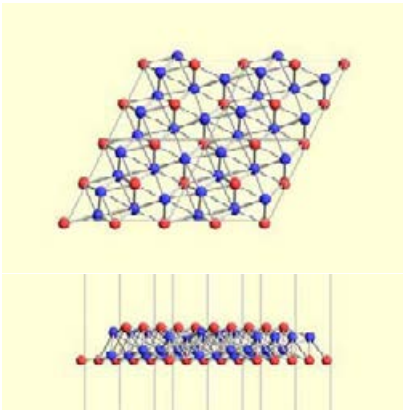

$\text{PV}_2$  (T)

×

×

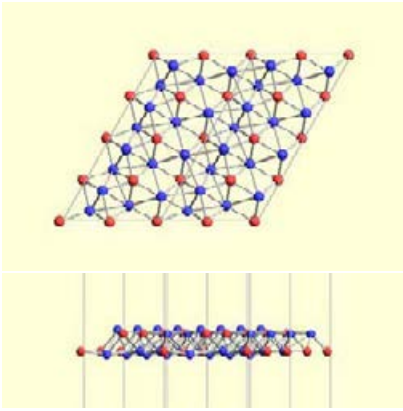

$\text{PCr}_2$  (T)

×

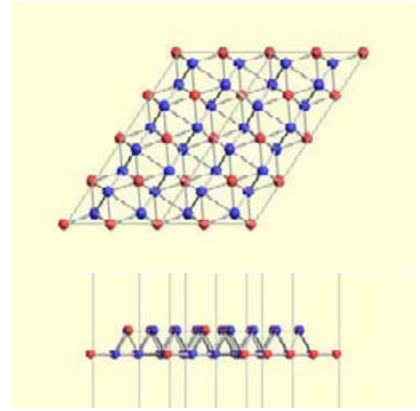

$\text{PCr}_2$  (P)

×

×

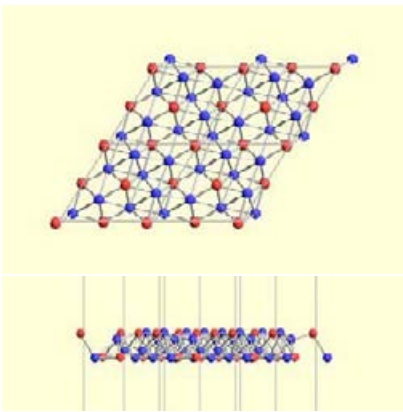

$\text{PMn}_2$  (T)

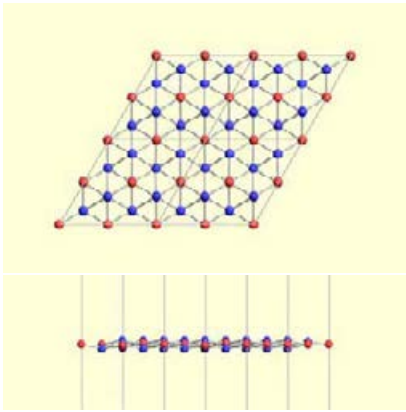

PFe<sub>2</sub> (T)

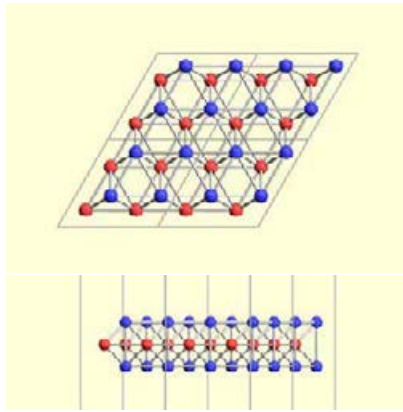

PFe<sub>2</sub> (H)

×

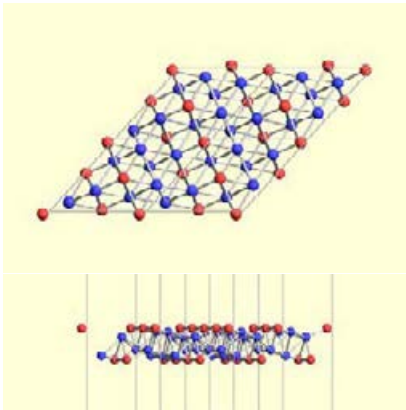

PCo<sub>2</sub> (T)

×

×

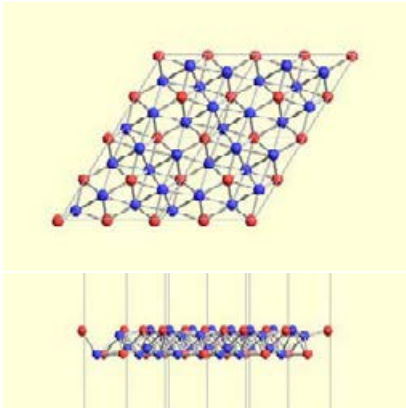

PNi<sub>2</sub> (T)

×

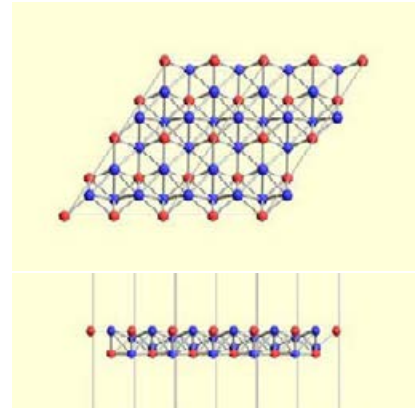

PNi<sub>2</sub> (P)

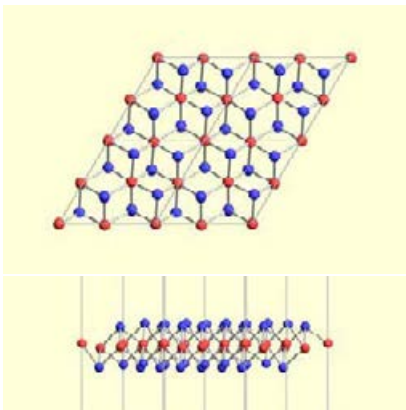

PGe<sub>2</sub> (T)

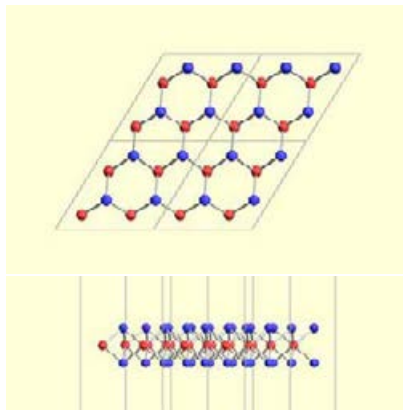

PGe<sub>2</sub> (H)

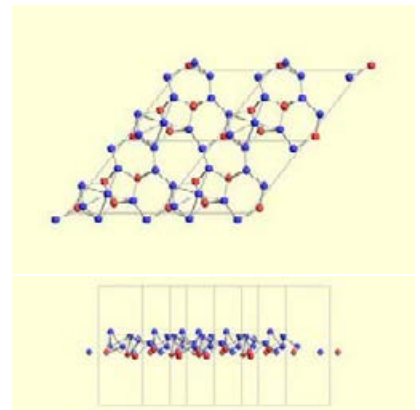

PGe<sub>2</sub> (P)

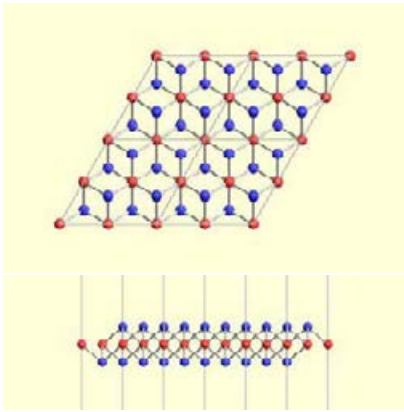

PSe<sub>2</sub> (T)

×

×

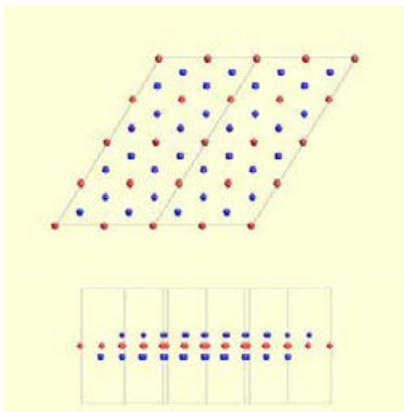

PRb<sub>2</sub> (T)

×

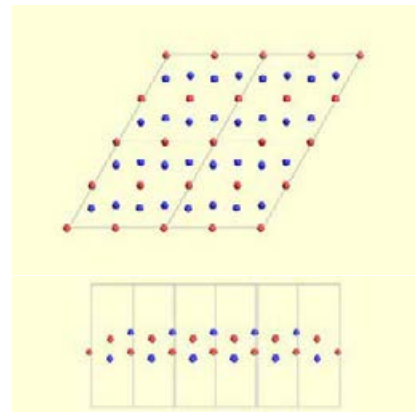

PRb<sub>2</sub> (P)

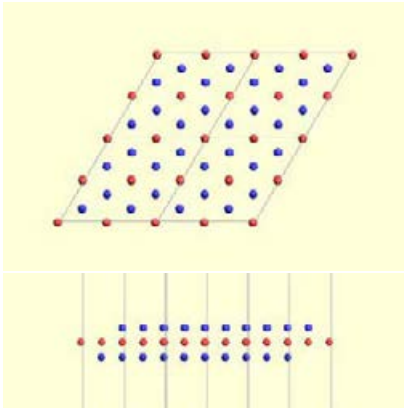

PSr<sub>2</sub> (T)

×

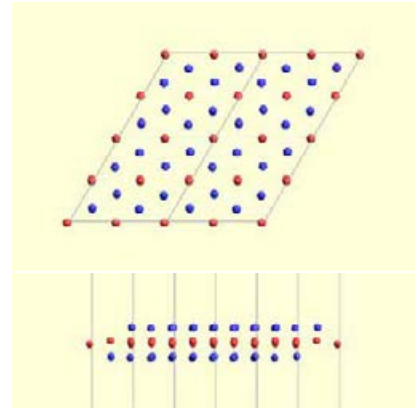

PSr<sub>2</sub> (P)

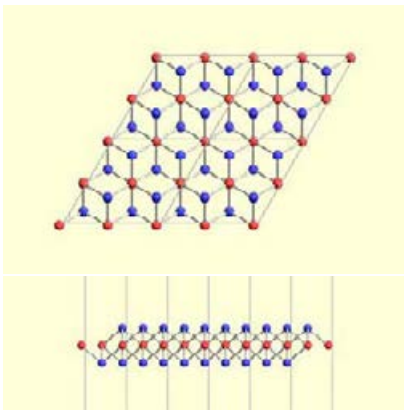

PY<sub>2</sub> (T)

×

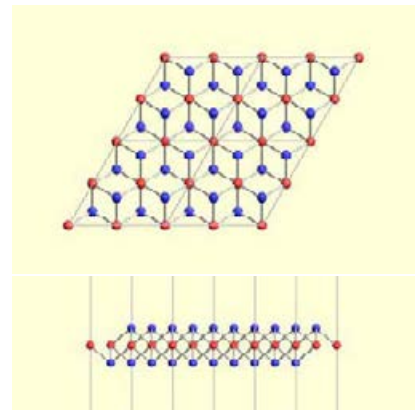

PY<sub>2</sub> (P)



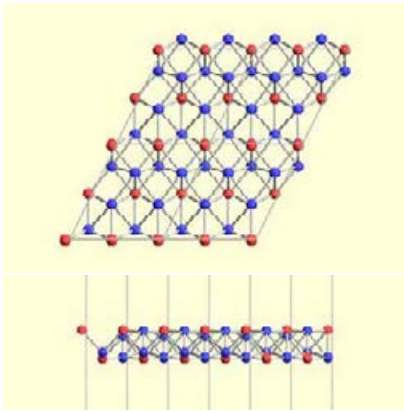

$\text{PNb}_2$  (T)

×

×

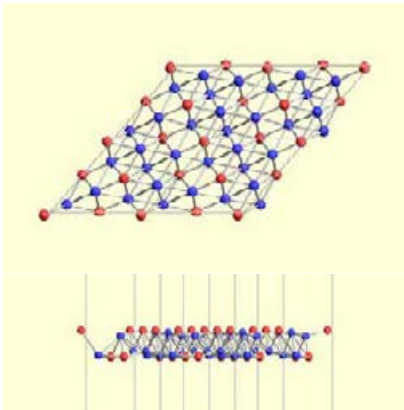

$\text{PMo}_2$  (T)

×

×

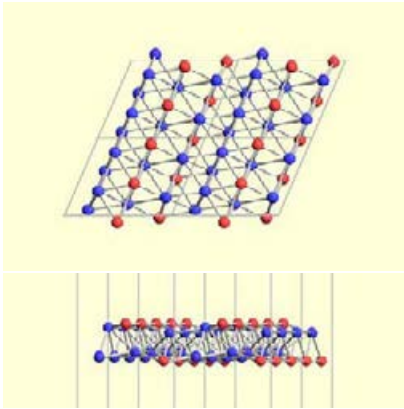

$\text{PTc}_2$  (T)

×

×

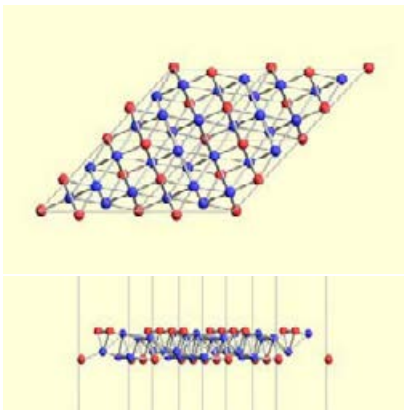

$\text{PRu}_2$  (T)

×

×

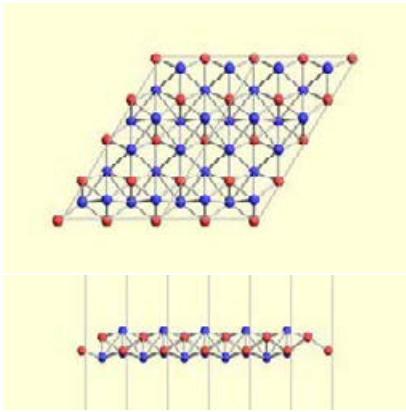

PRh<sub>2</sub> (T)

×

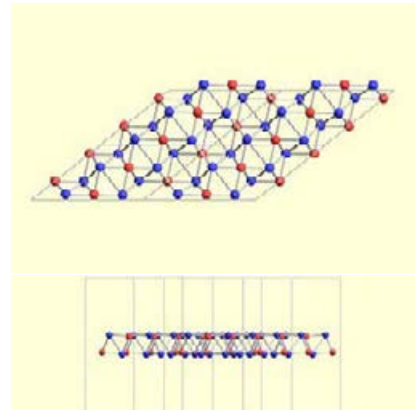

PRh<sub>2</sub> (P)

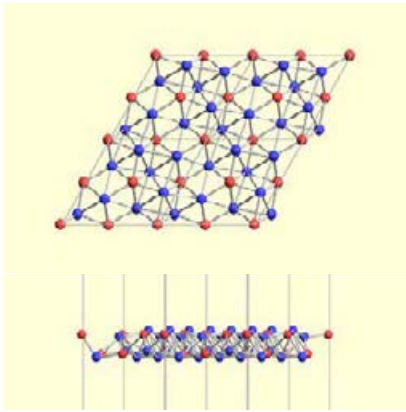

PPd<sub>2</sub> (T)

×

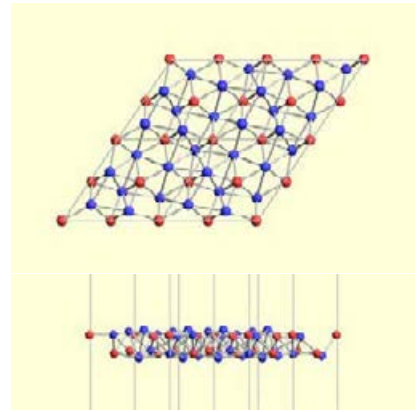

PPd<sub>2</sub> (P)

×

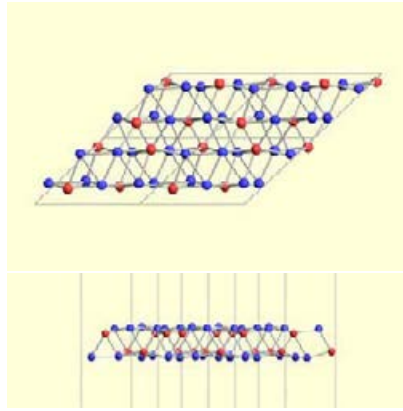

PAg<sub>2</sub> (H)

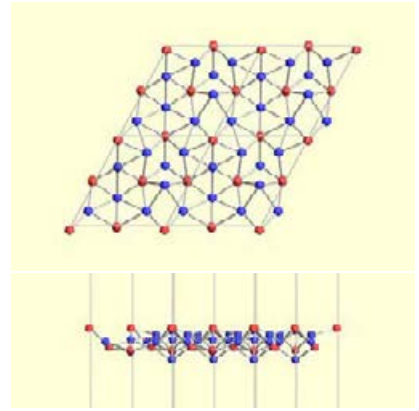

PAg<sub>2</sub> (P)

×

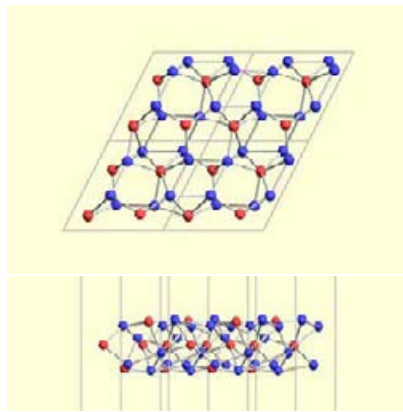

PCd<sub>2</sub> (H)

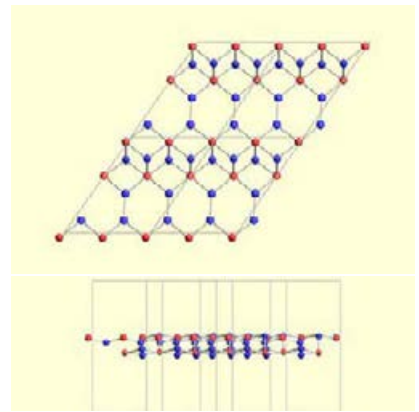

PCd<sub>2</sub> (P)

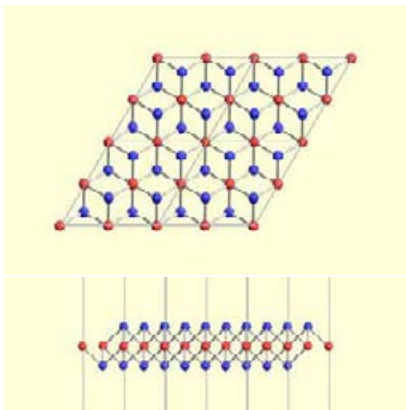

PSn<sub>2</sub> (T)

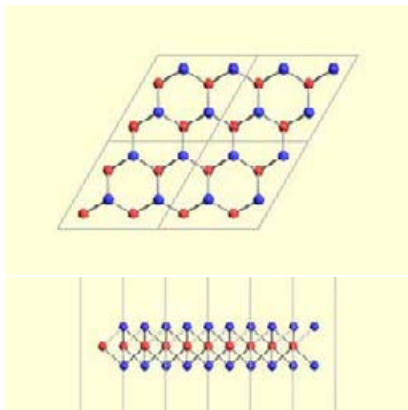

PSn<sub>2</sub> (H)

×

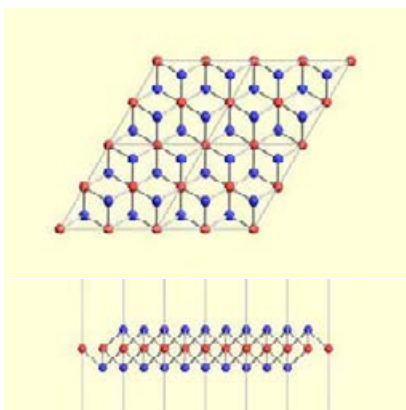

PTe<sub>2</sub> (T)

×

×

×

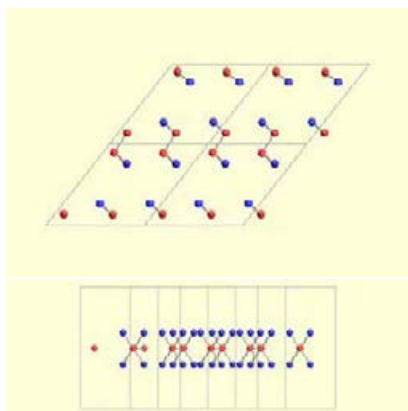

PI<sub>2</sub> (H)

×

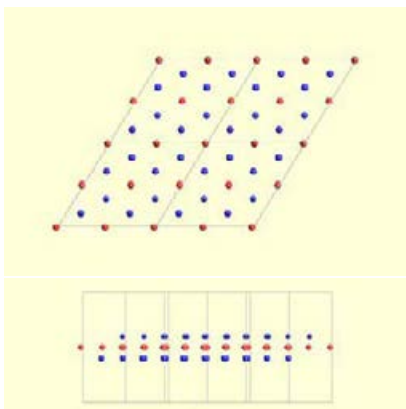

PCs<sub>2</sub> (T)

×

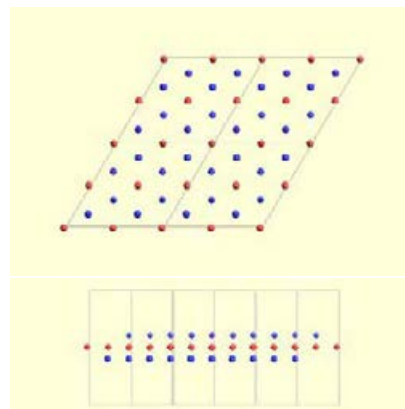

PCs<sub>2</sub> (P)

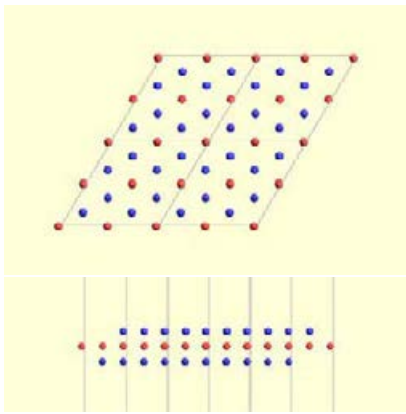

PBa<sub>2</sub> (T)

×

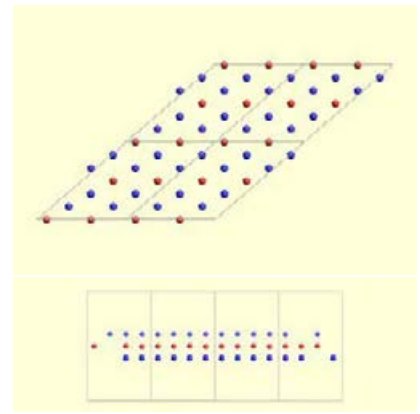

PBa<sub>2</sub> (P)

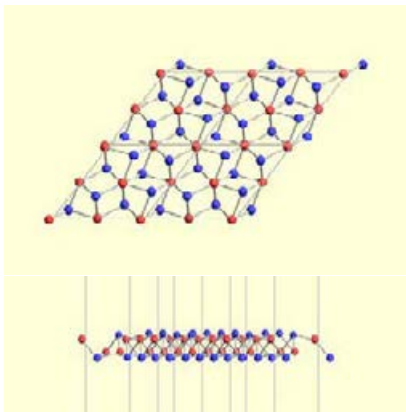

PHf<sub>2</sub> (T)

×

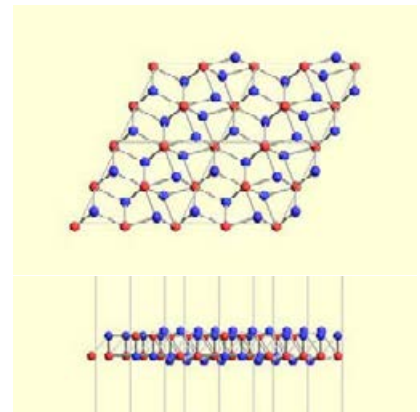

PHf<sub>2</sub> (P)

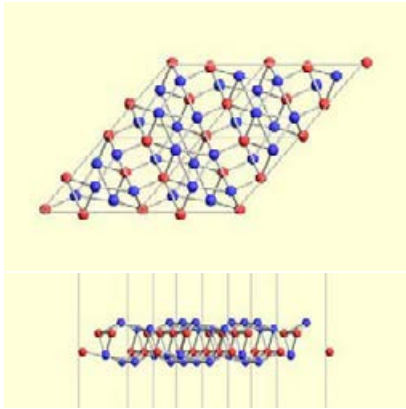

PPt<sub>2</sub> (T)

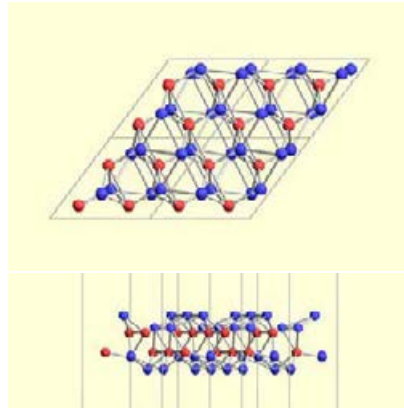

PPt<sub>2</sub> (H)

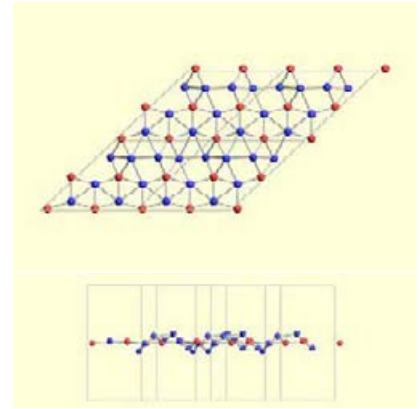

PPt<sub>2</sub> (P)

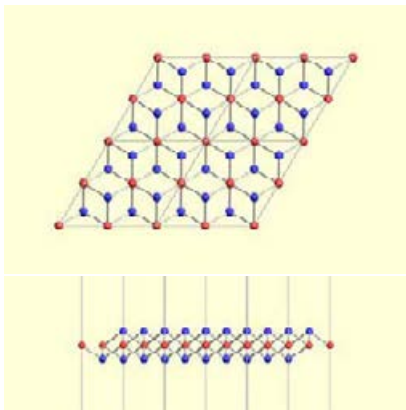

Ptl<sub>2</sub> (T)

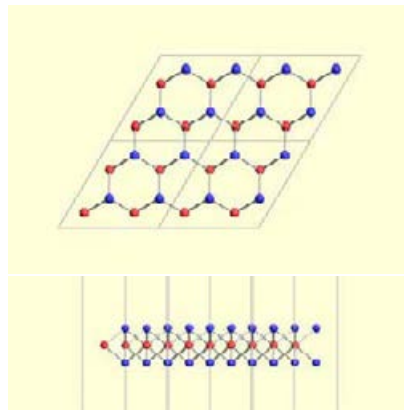

Ptl<sub>2</sub> (H)

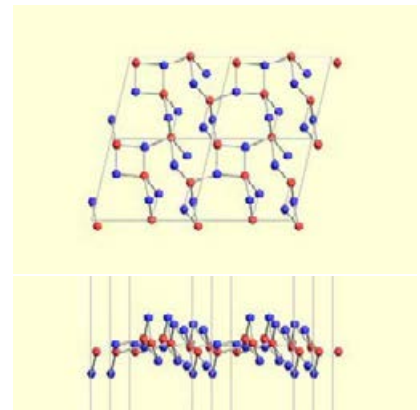

Ptl<sub>2</sub> (P)

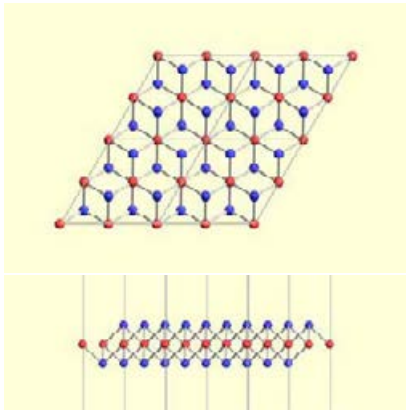

PPb<sub>2</sub> (T)

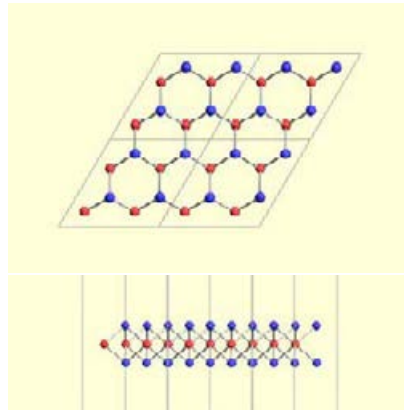

PPb<sub>2</sub> (H)

×

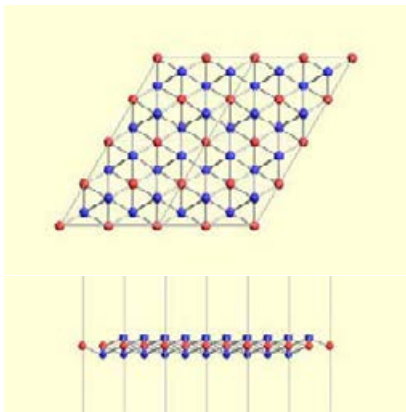

SLi<sub>2</sub> (T)

×

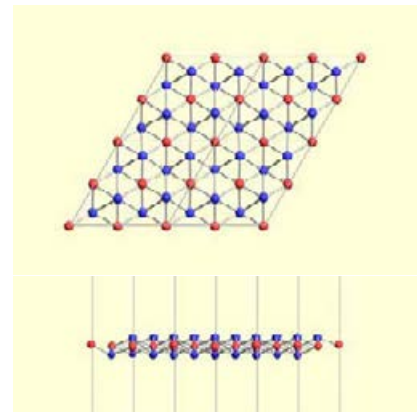

SLi<sub>2</sub> (P)

×

×

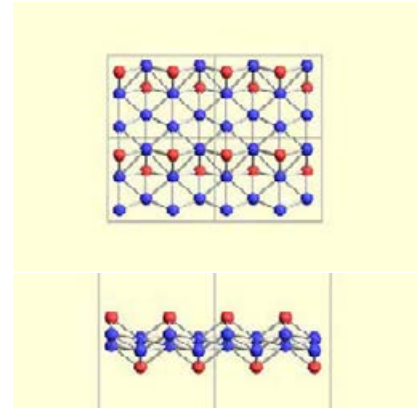

SBe<sub>2</sub> (P)

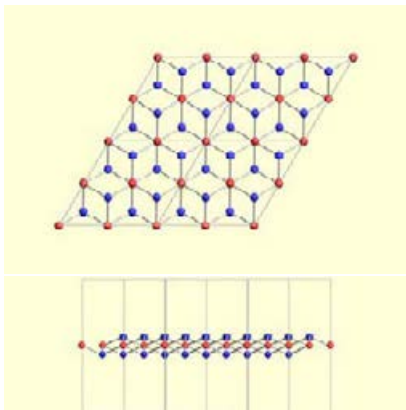

SNa<sub>2</sub> (T)

×

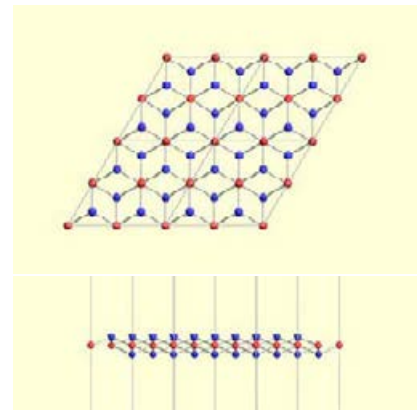

SNa<sub>2</sub> (P)



×

×

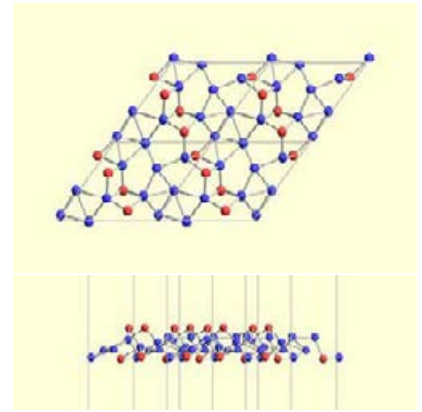

SAl<sub>2</sub> (P)

×

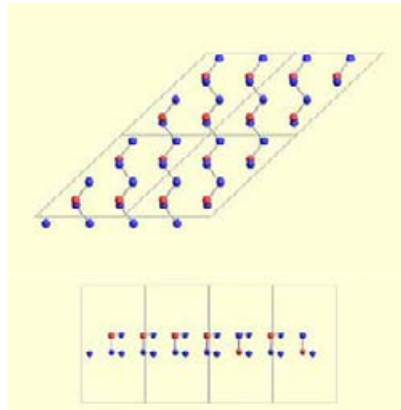

SS<sub>2</sub> (H)

×

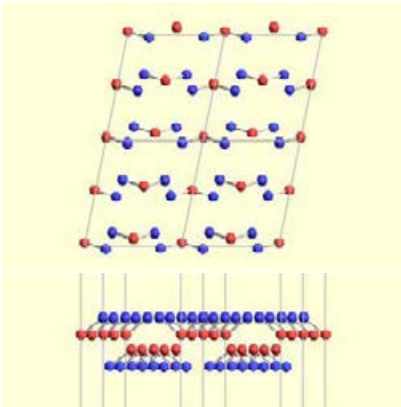

SCl<sub>2</sub> (T)

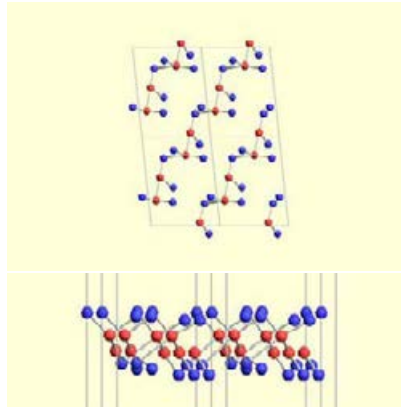

SCl<sub>2</sub> (H)

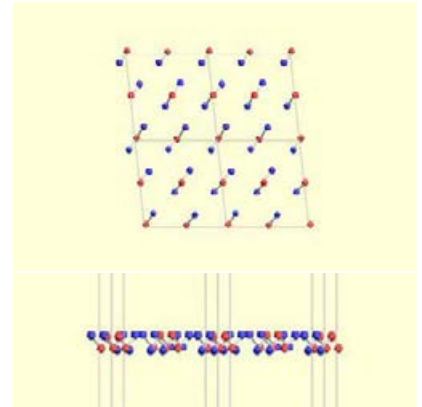

SCl<sub>2</sub> (P)

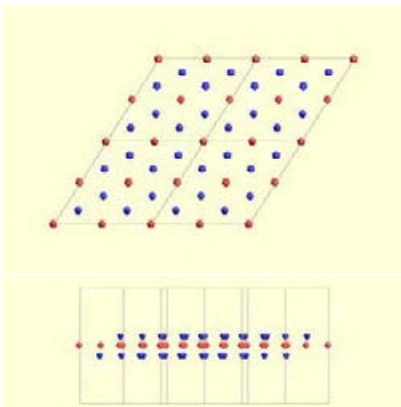

SK<sub>2</sub> (T)

×

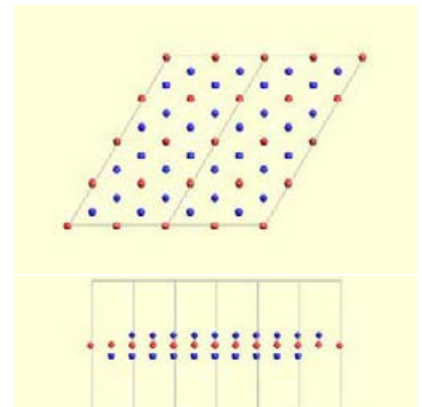

SK<sub>2</sub> (P)

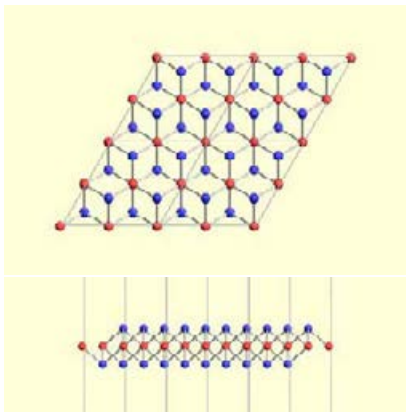

SCa<sub>2</sub> (T)

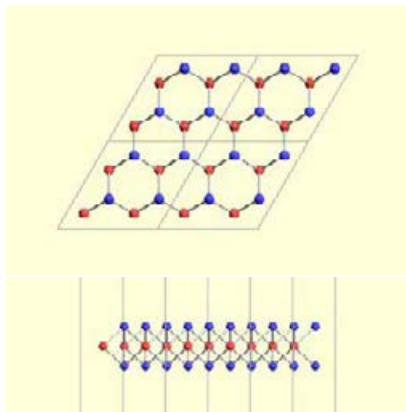

SCa<sub>2</sub> (H)

×

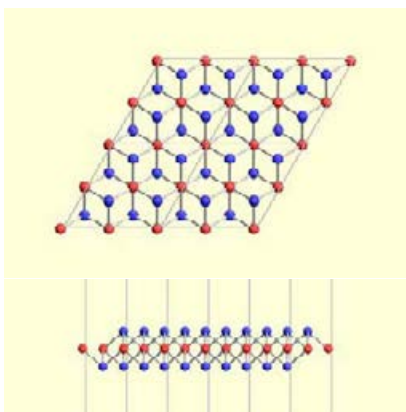

SSc<sub>2</sub> (T)

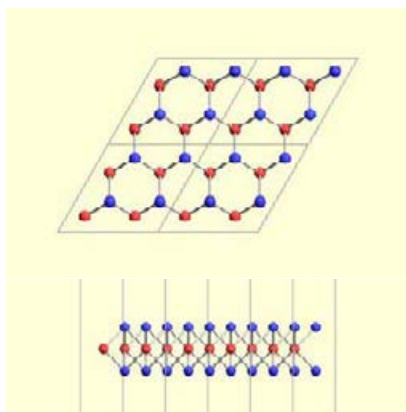

SSc<sub>2</sub> (H)

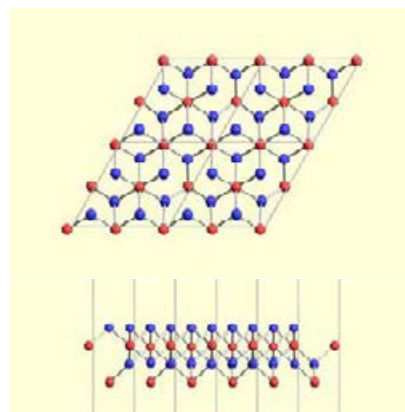

SSc<sub>2</sub> (P)

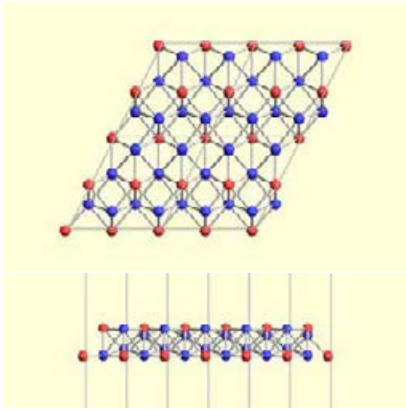

STi<sub>2</sub> (T)

×

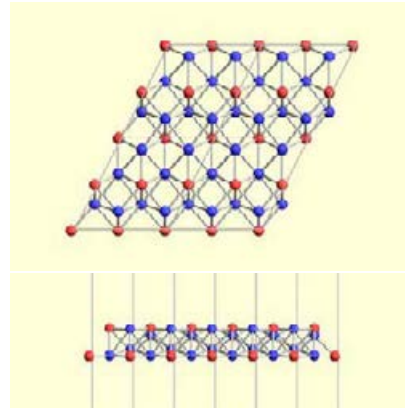

STi<sub>2</sub> (P)

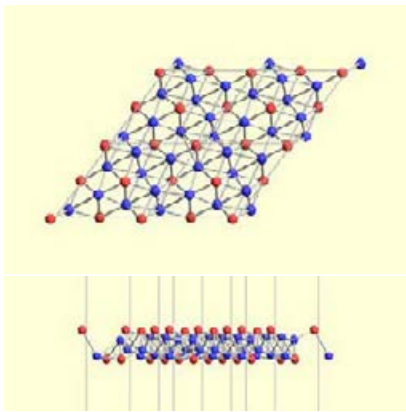

SV<sub>2</sub> (T)

×

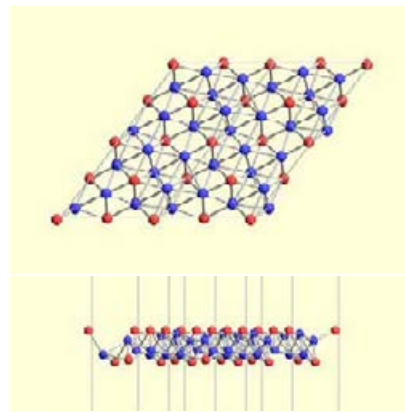

SV<sub>2</sub> (P)

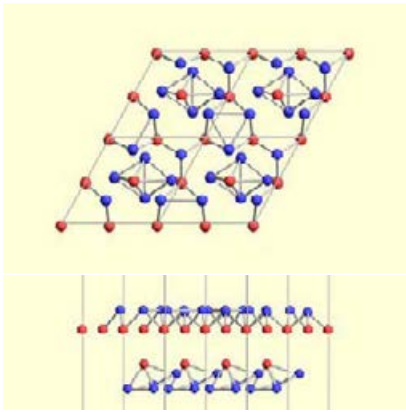

SGe<sub>2</sub> (T)

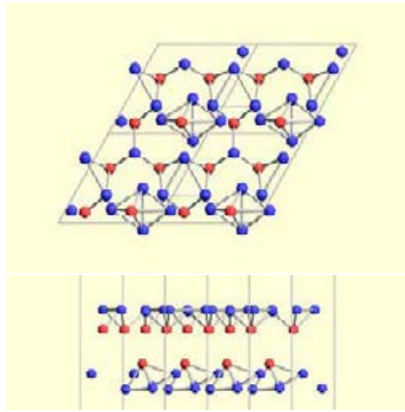

SGe<sub>2</sub> (H)

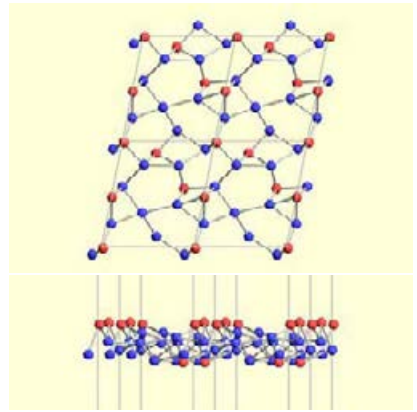

SGe<sub>2</sub> (P)

×

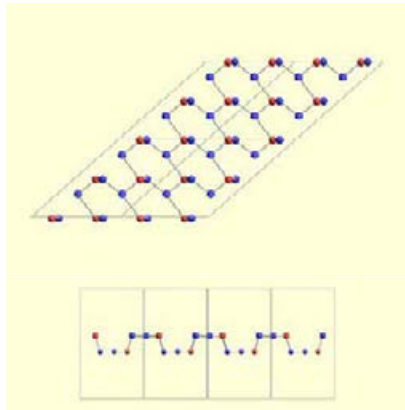

SSe<sub>2</sub> (H)

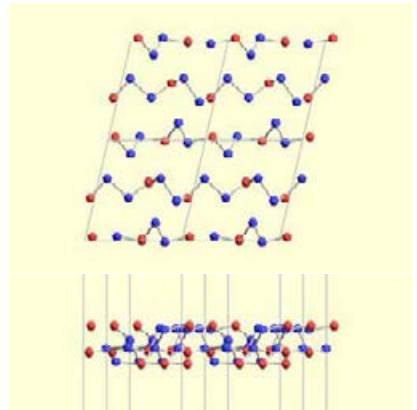

SSe<sub>2</sub> (P)

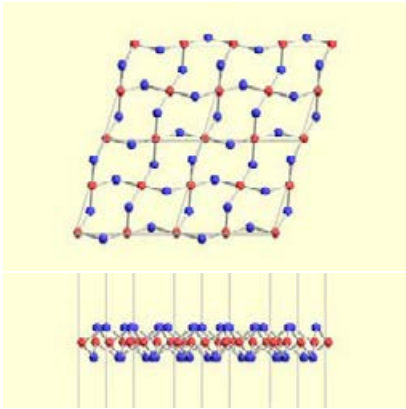

SBr<sub>2</sub> (T)

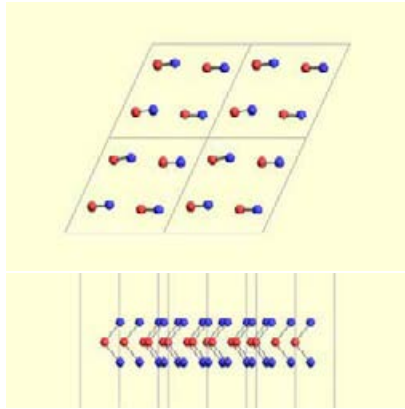

SBr<sub>2</sub> (H)

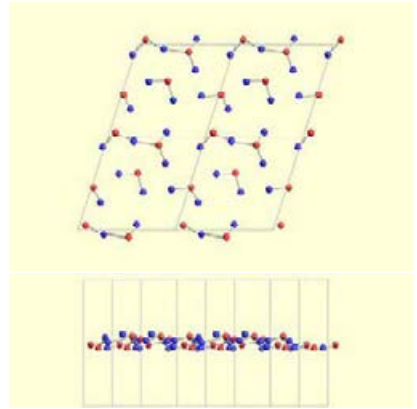

SBr<sub>2</sub> (P)

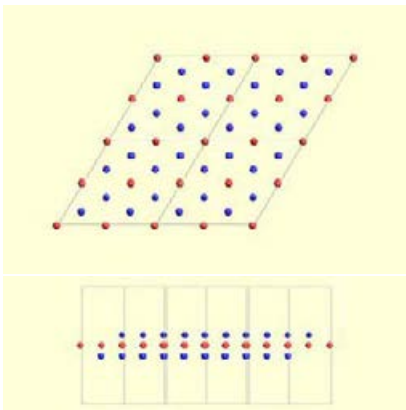

SRb<sub>2</sub> (T)

×

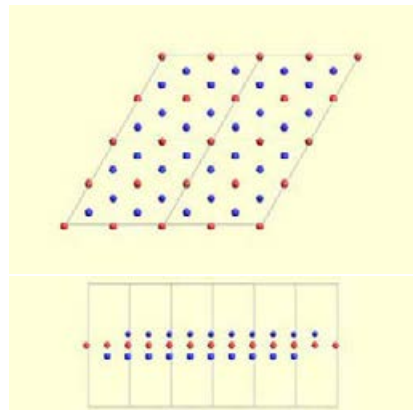

SRb<sub>2</sub> (P)

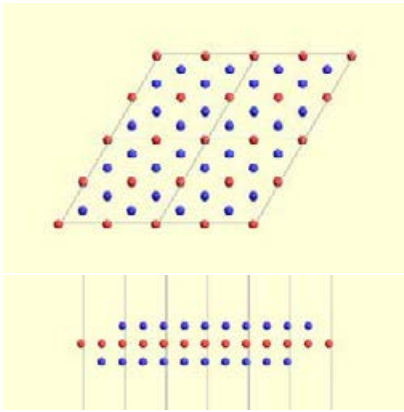

SSr<sub>2</sub> (T)

×

×

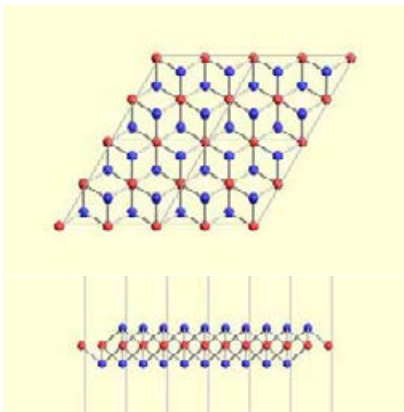

SY<sub>2</sub> (T)

×

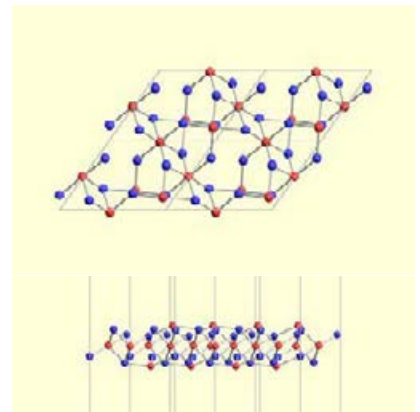

SY<sub>2</sub> (P)

×

×

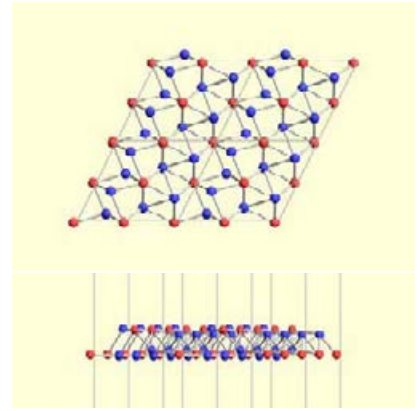

SZr<sub>2</sub> (P)

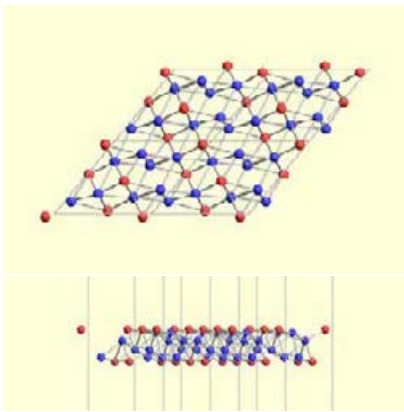

SNb<sub>2</sub> (T)

×

×



×

×

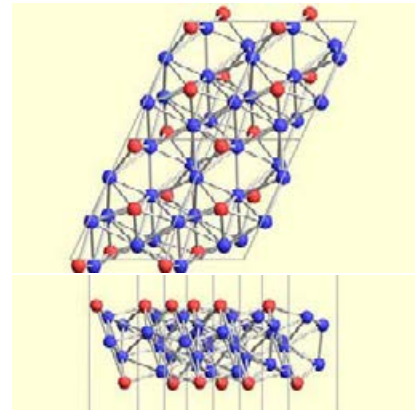

STc<sub>2</sub> (P)

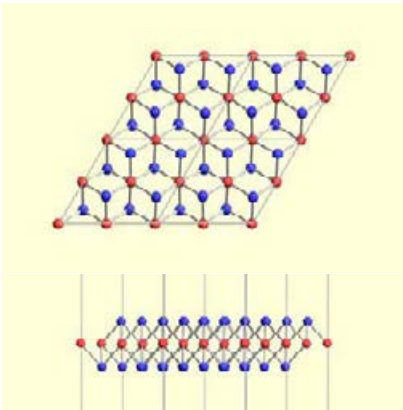

SSn<sub>2</sub> (T)

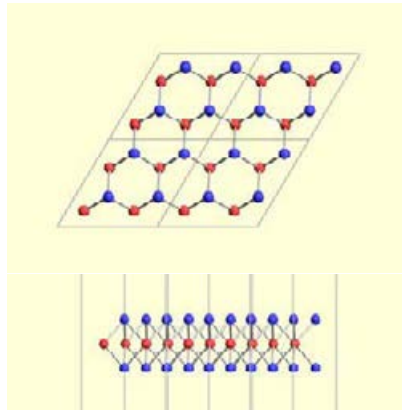

SSn<sub>2</sub> (H)

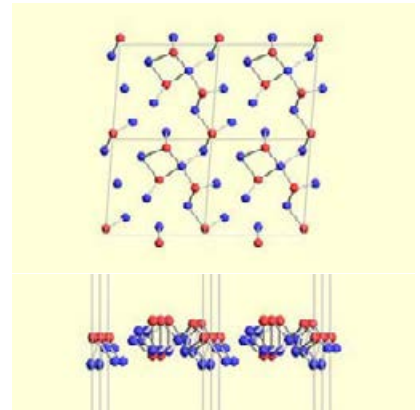

SSn<sub>2</sub> (P)

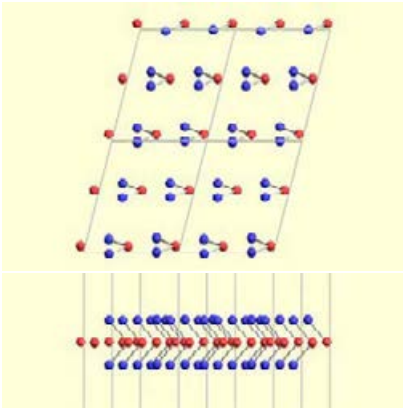

SI<sub>2</sub> (T)

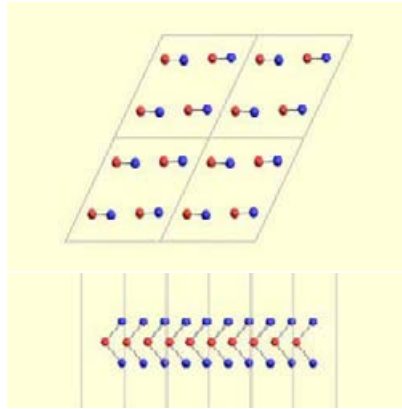

SI<sub>2</sub> (H)

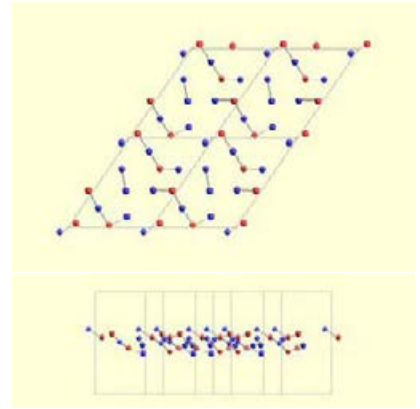

SI<sub>2</sub> (P)

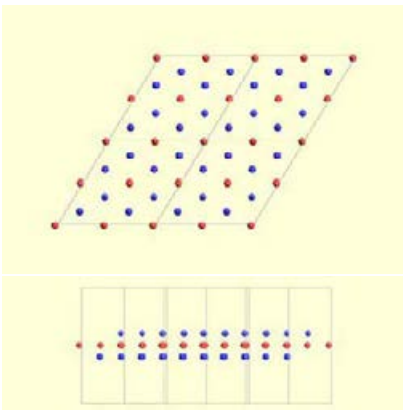

SCs<sub>2</sub> (T)

×

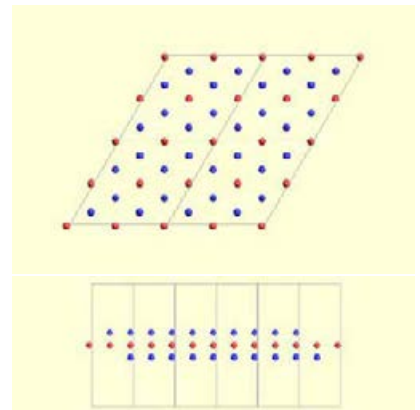

SCs<sub>2</sub> (P)



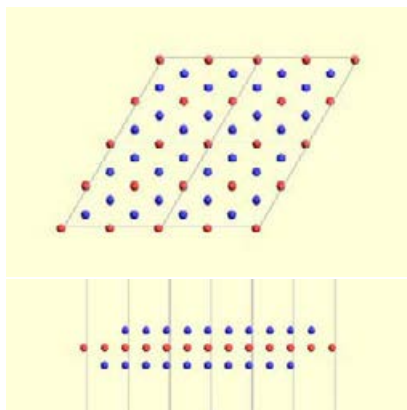

SBa<sub>2</sub> (T)

×

×

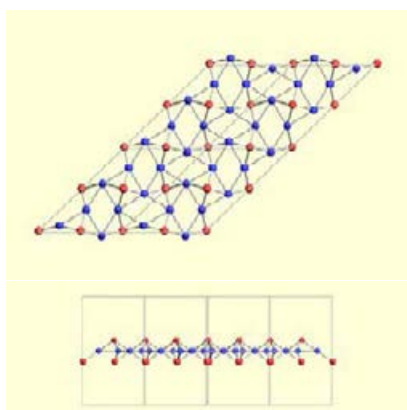

SAu<sub>2</sub> (T)

×

×

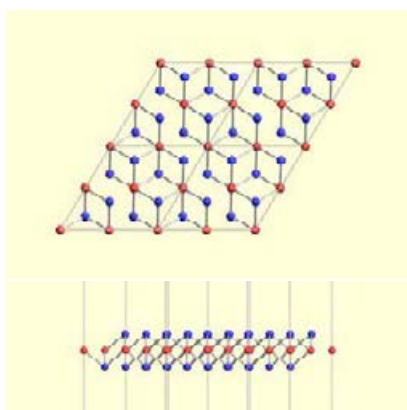

STl<sub>2</sub> (T)

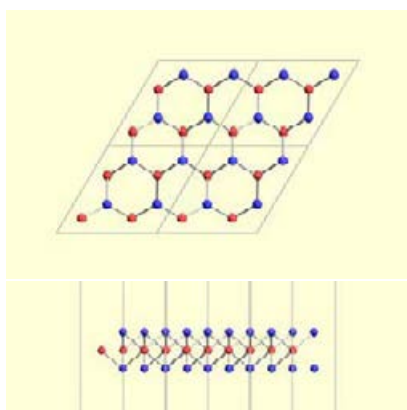

STl<sub>2</sub> (H)

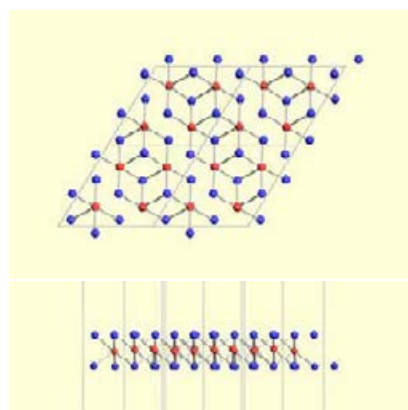

STl<sub>2</sub> (P)

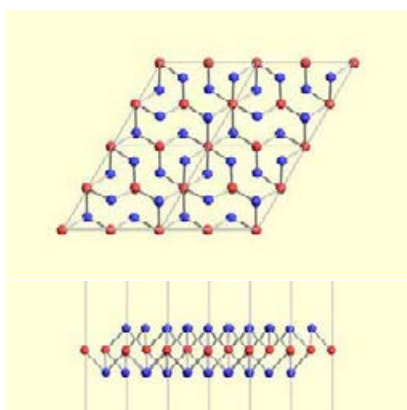

SPb<sub>2</sub> (T)

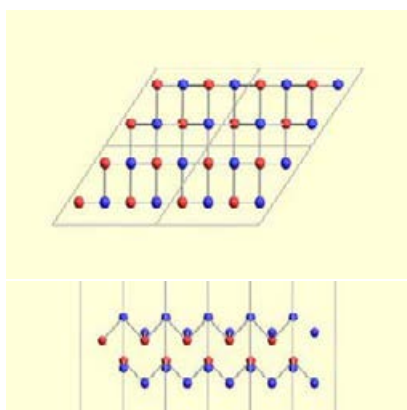

SPb<sub>2</sub> (H)

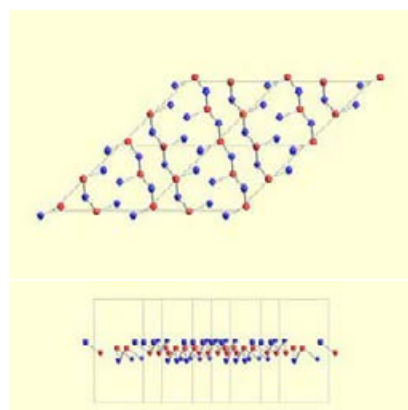

SPb<sub>2</sub> (P)

×

×

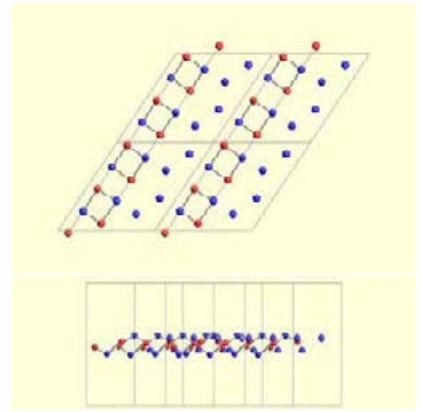

SbI<sub>2</sub> (P)

×

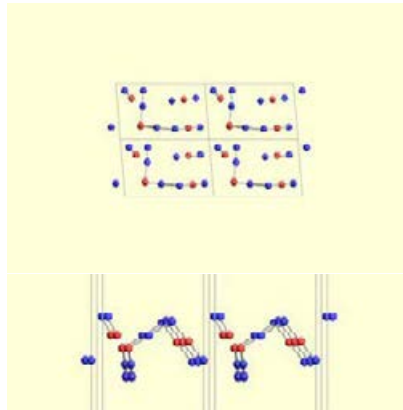

ClCl<sub>2</sub> (H)

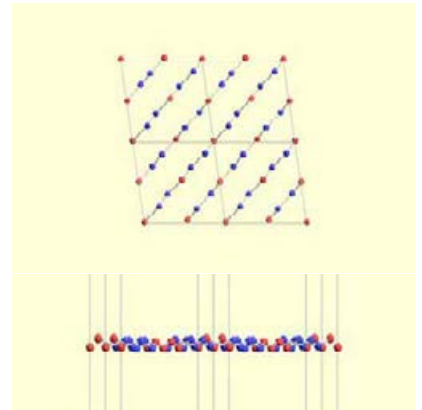

ClCl<sub>2</sub> (P)

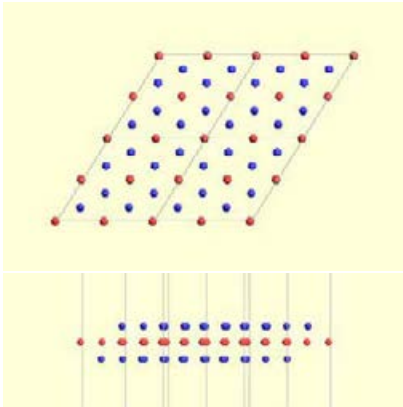

ClK<sub>2</sub> (T)

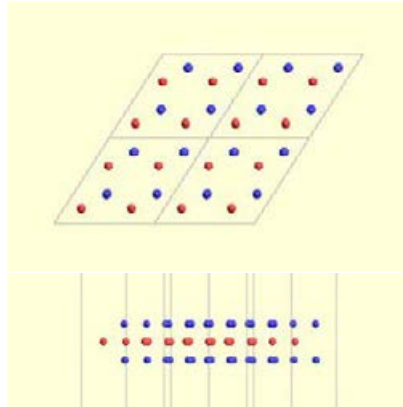

ClK<sub>2</sub> (H)

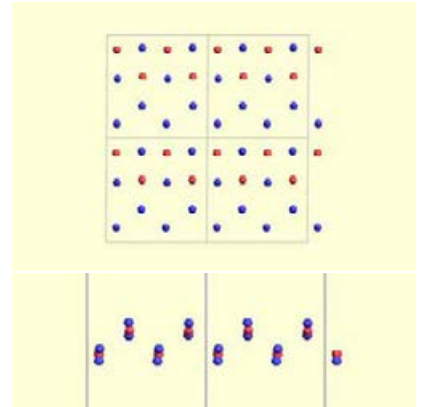

ClK<sub>2</sub> (P)

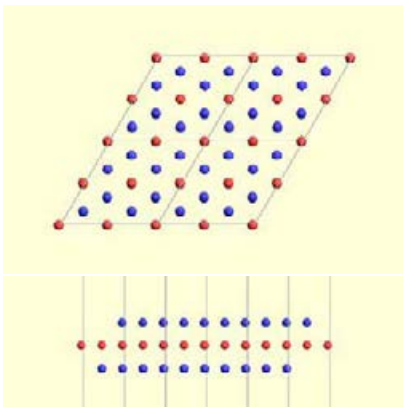

ClCa<sub>2</sub> (T)

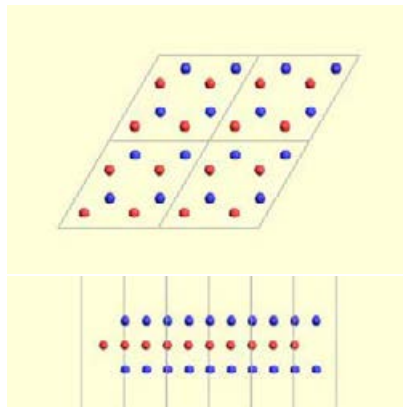

ClCa<sub>2</sub> (H)

×

×

×

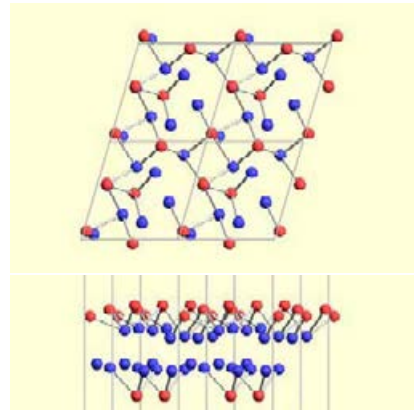

ClSc<sub>2</sub> (P)

×

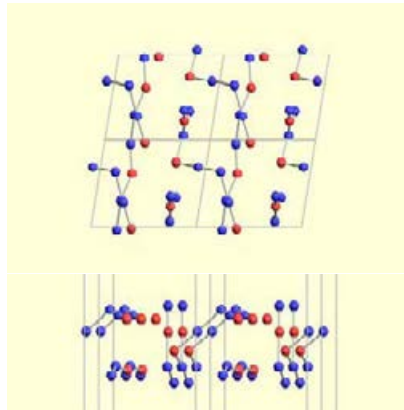

ClBr<sub>2</sub> (H)

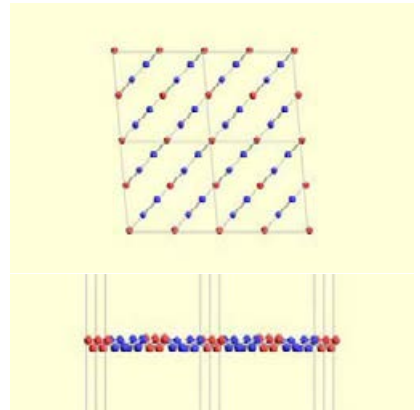

ClBr<sub>2</sub> (P)

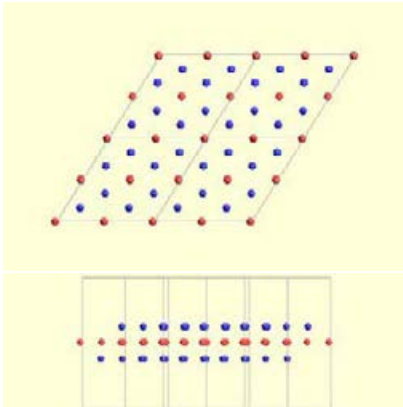

ClRb<sub>2</sub> (T)

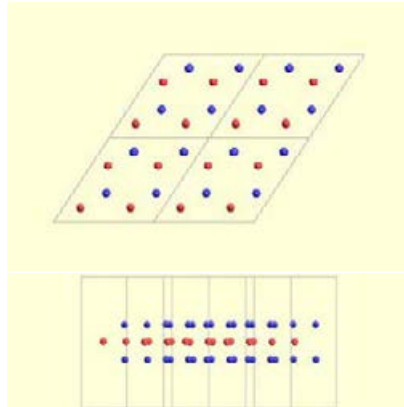

ClRb<sub>2</sub> (H)

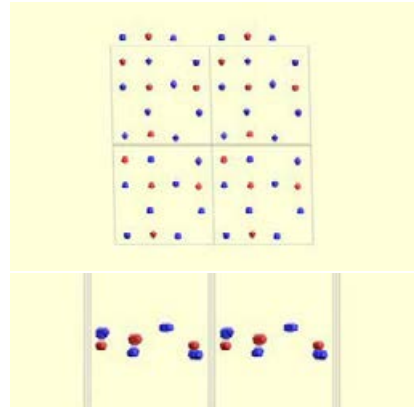

ClRb<sub>2</sub> (P)

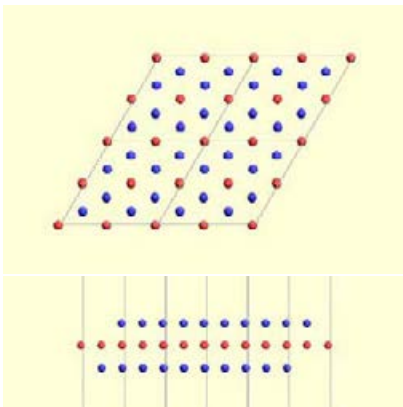

ClSr<sub>2</sub> (T)

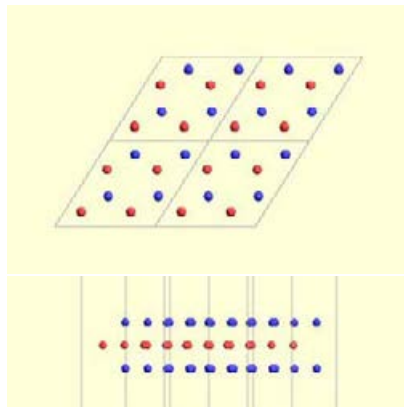

ClSr<sub>2</sub> (H)

×

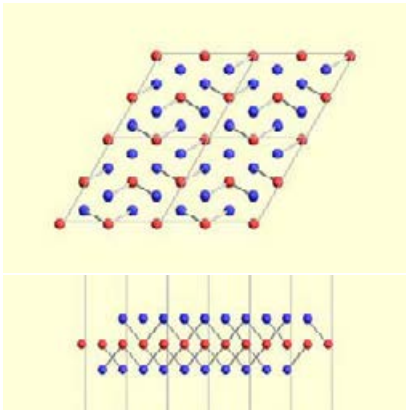

$\text{ClY}_2$  (T)

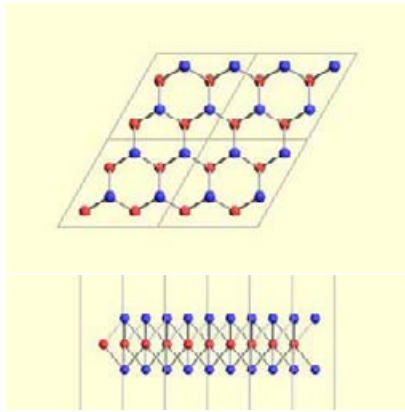

$\text{ClY}_2$  (H)

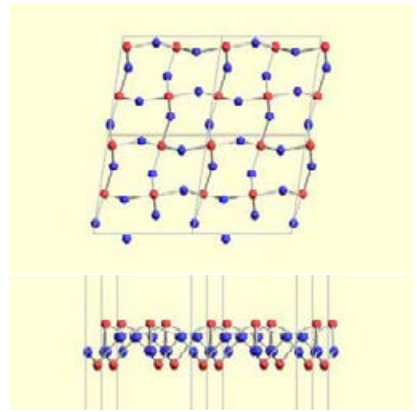

$\text{ClY}_2$  (P)

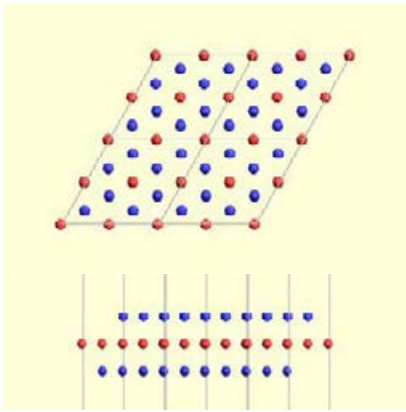

$\text{ClIn}_2$  (T)

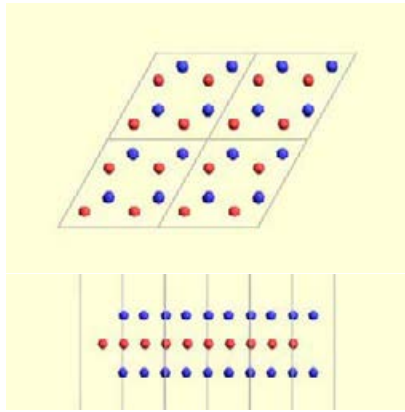

$\text{ClIn}_2$  (H)

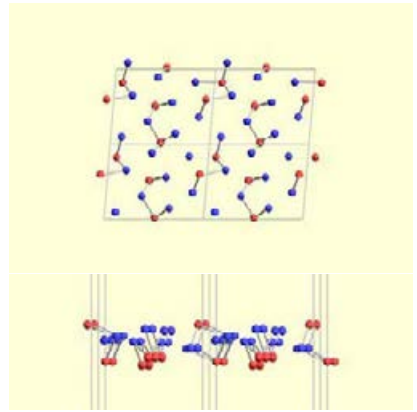

$\text{ClIn}_2$  (P)

×

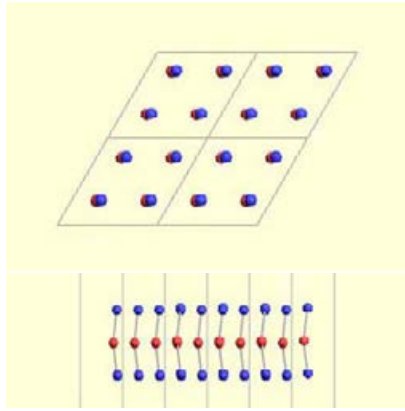

$\text{ClSn}_2$  (H)

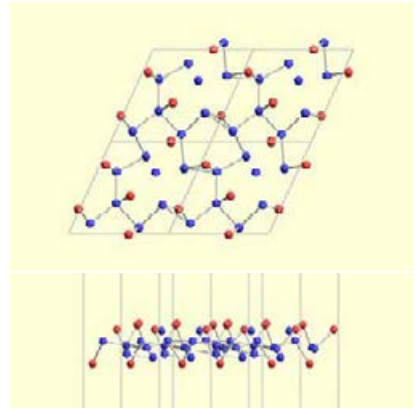

$\text{ClSn}_2$  (P)

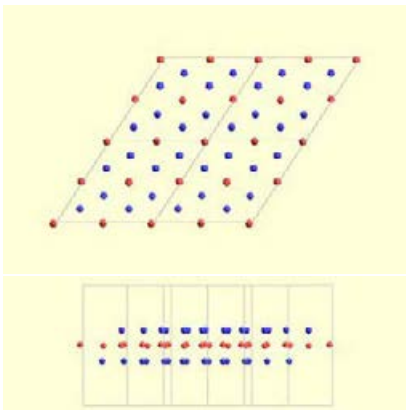

$\text{ClCs}_2$  (T)

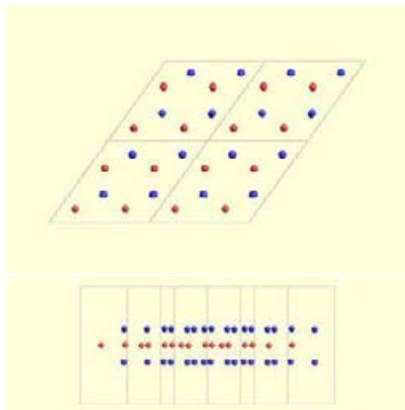

$\text{ClCs}_2$  (H)

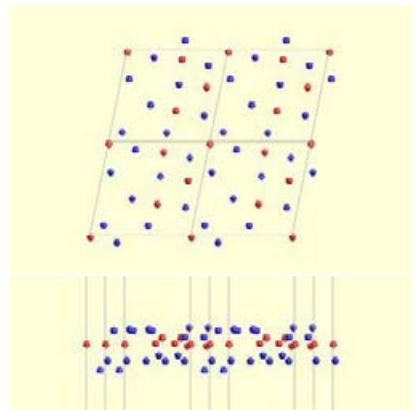

$\text{ClCs}_2$  (P)



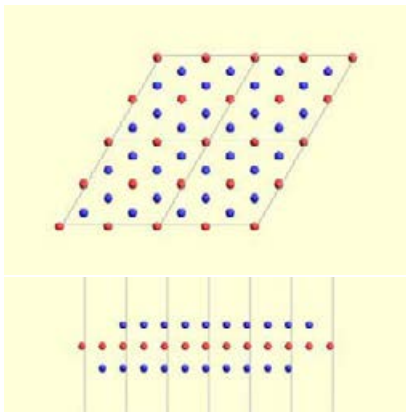

ClBa<sub>2</sub> (T)

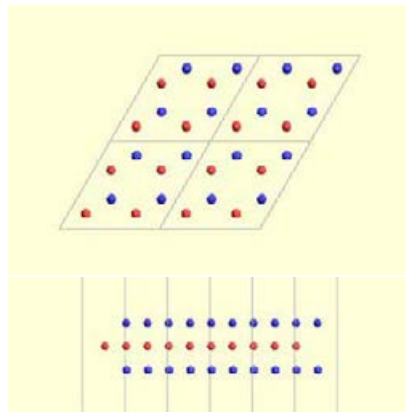

ClBa<sub>2</sub> (H)

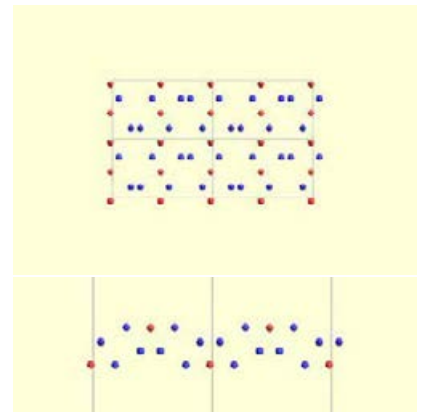

ClBa<sub>2</sub> (P)

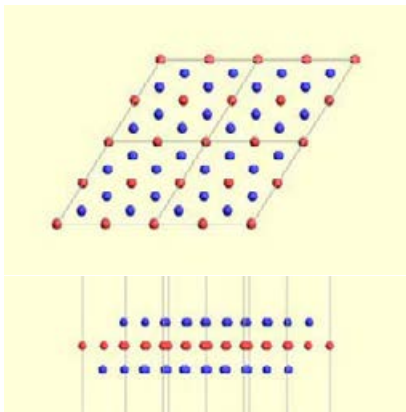

ClTl<sub>2</sub> (T)

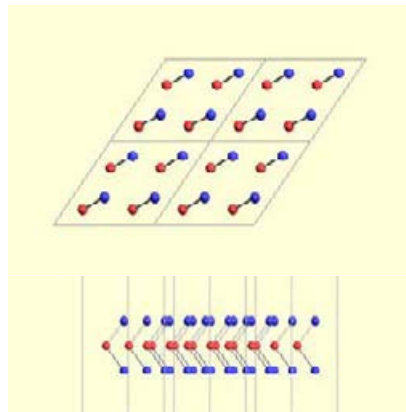

ClTl<sub>2</sub> (H)

×

×

×

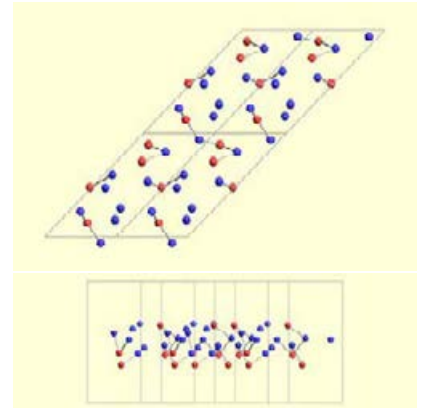

ClPb<sub>2</sub> (P)

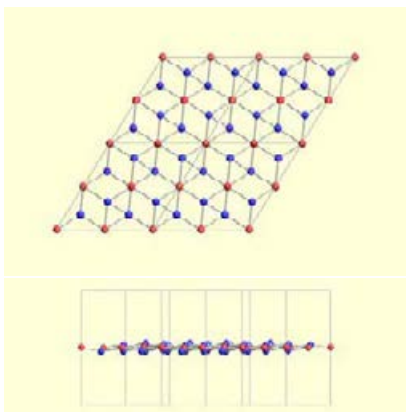

KN<sub>2</sub> (T)

×

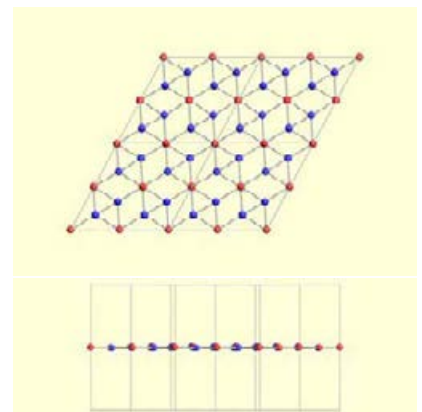

KN<sub>2</sub> (P)



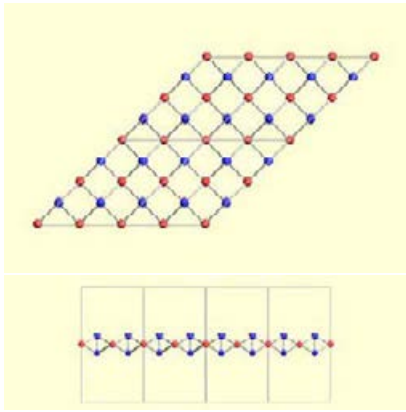

KF<sub>2</sub> (T)

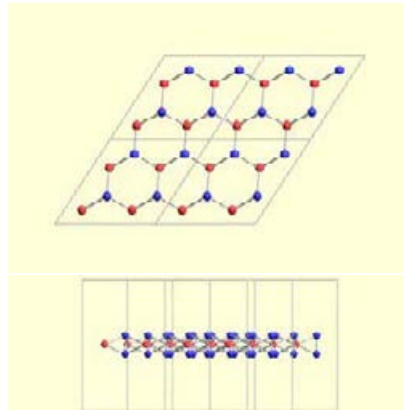

KF<sub>2</sub> (H)

×

×

×

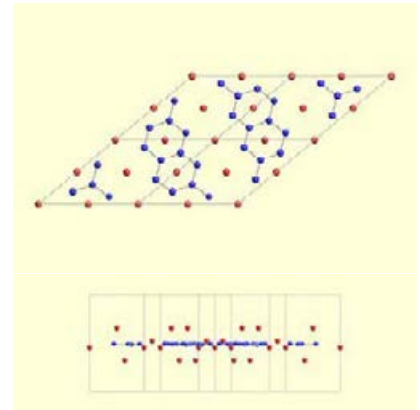

KSi<sub>2</sub> (P)

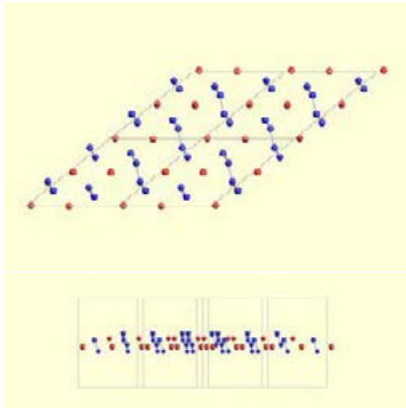

KS<sub>2</sub> (T)

×

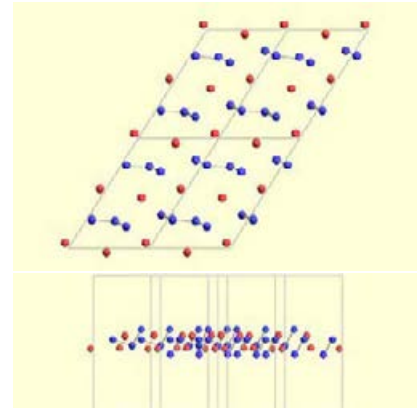

KS<sub>2</sub> (P)

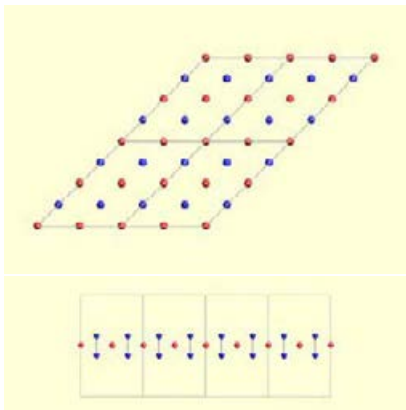

KCl<sub>2</sub> (T)

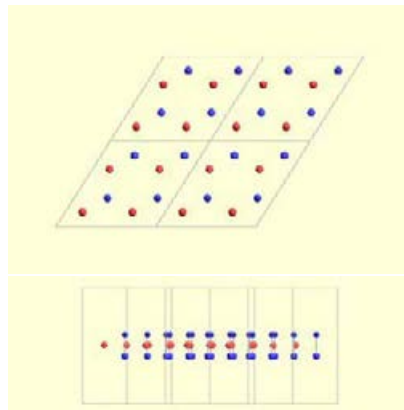

KCl<sub>2</sub> (H)

×

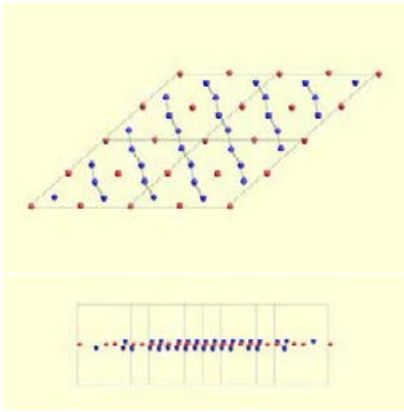

KSe<sub>2</sub> (T)

×

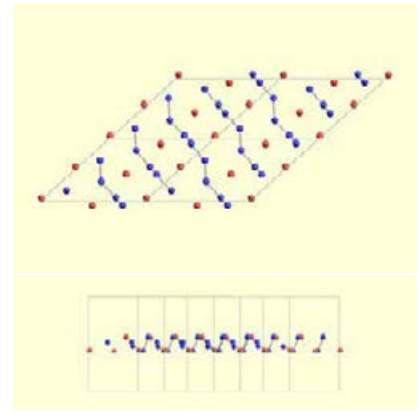

KSe<sub>2</sub> (P)

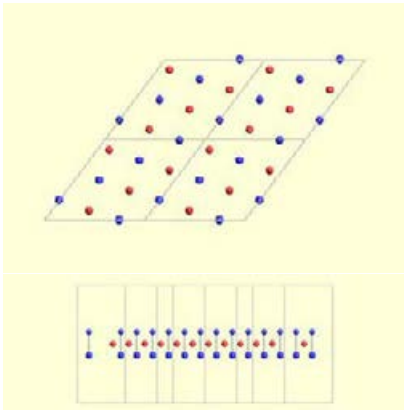

KBr<sub>2</sub> (T)

×

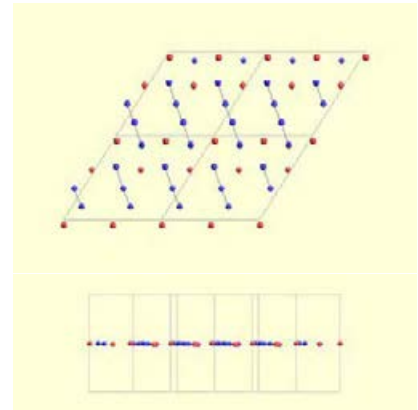

KBr<sub>2</sub> (P)

×

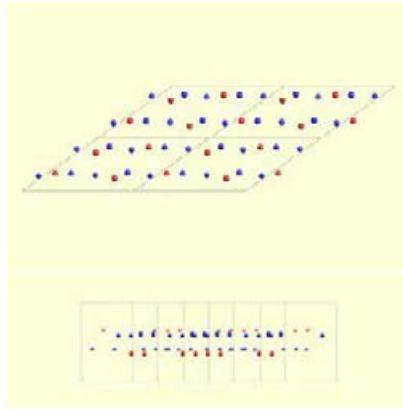

KSr<sub>2</sub> (H)

×

×

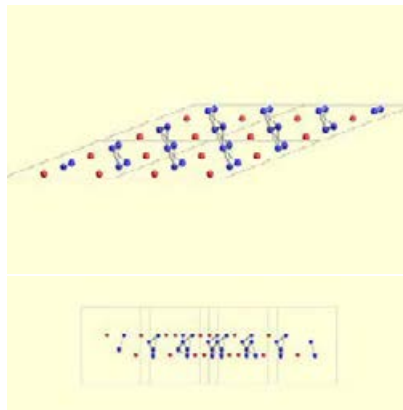

KAg<sub>2</sub> (H)

×

×

×

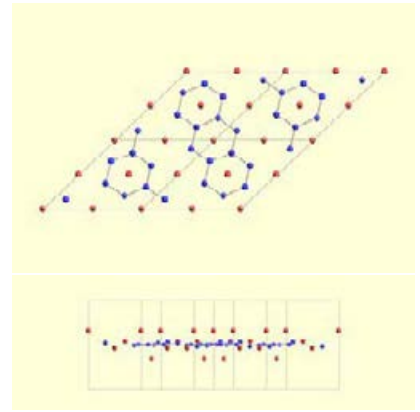

KSn<sub>2</sub> (P)

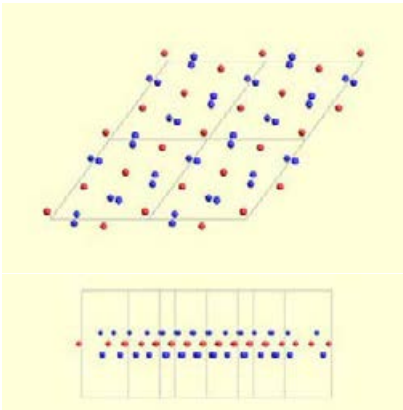

KI<sub>2</sub> (T)

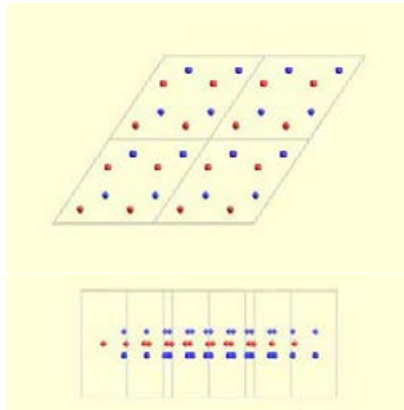

KI<sub>2</sub> (H)

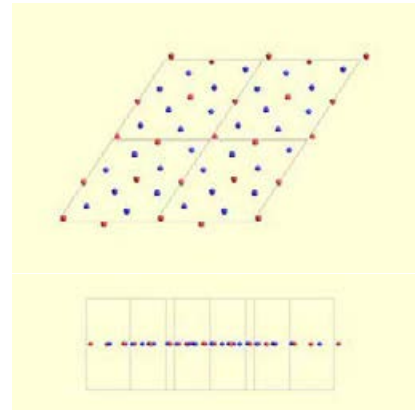

KI<sub>2</sub> (P)

×

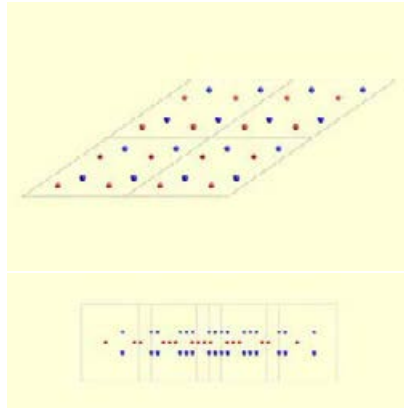

KBa<sub>2</sub> (H)

×

×

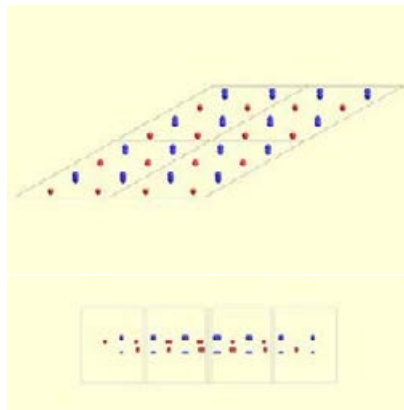

KBi<sub>2</sub> (H)

×

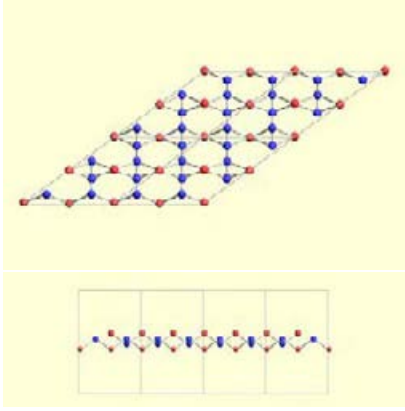

CaB<sub>2</sub> (T)

×

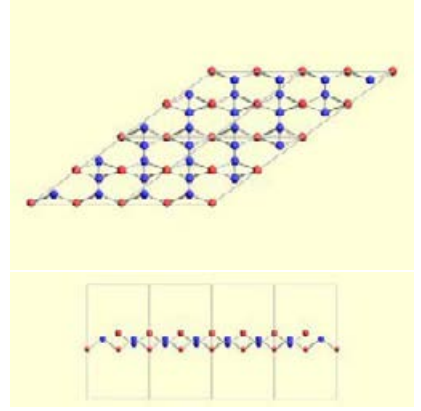

CaB<sub>2</sub> (P)

×

×

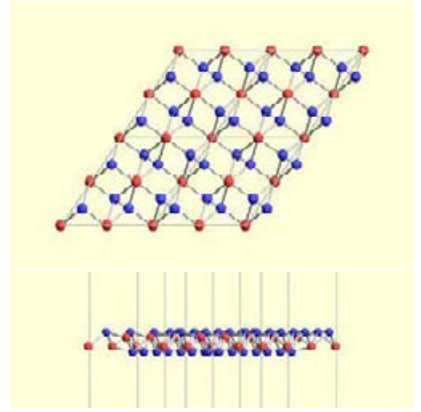

CaN<sub>2</sub> (P)

×

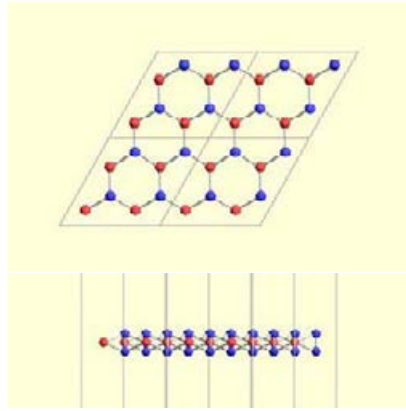

CaO<sub>2</sub> (H)

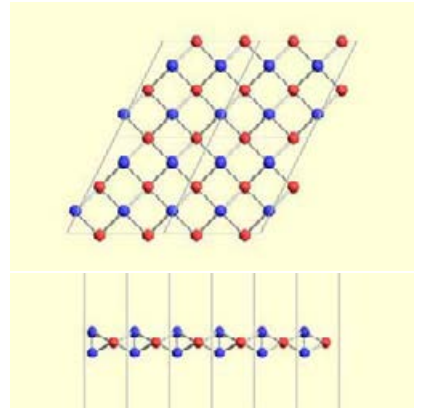

CaO<sub>2</sub> (P)

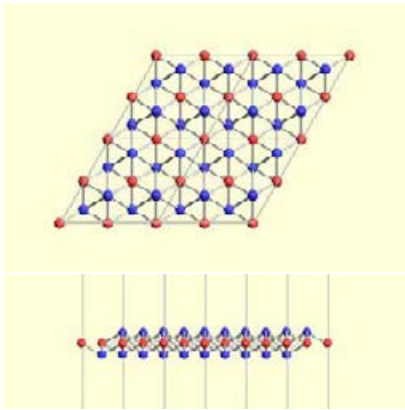

CaF<sub>2</sub> (T)

×

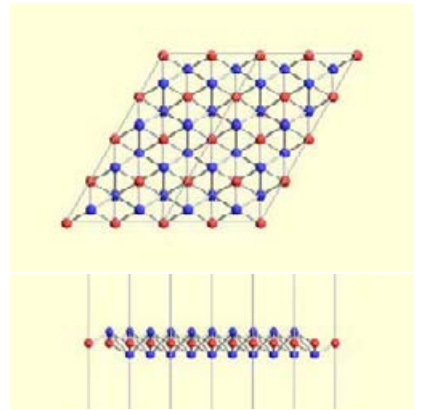

CaF<sub>2</sub> (P)

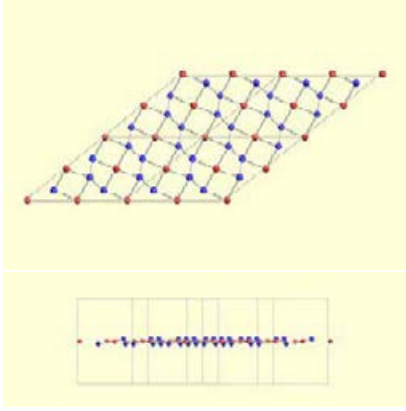

CaSi<sub>2</sub> (T)

×

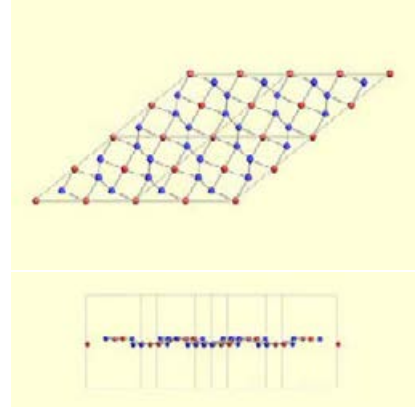

CaSi<sub>2</sub> (P)

×

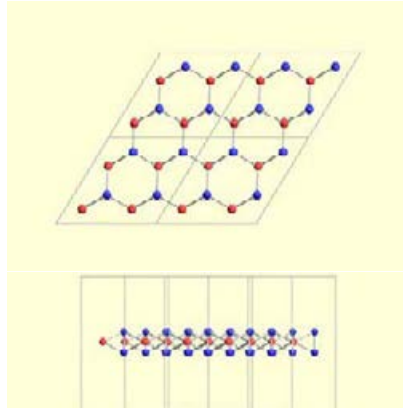

CaS<sub>2</sub> (H)

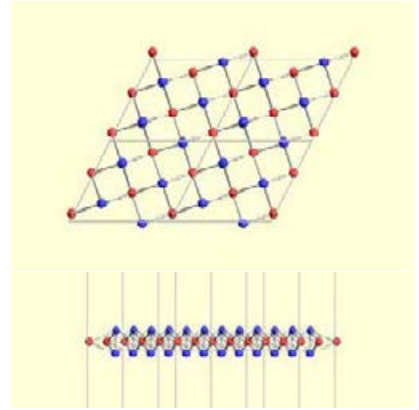

CaS<sub>2</sub> (P)

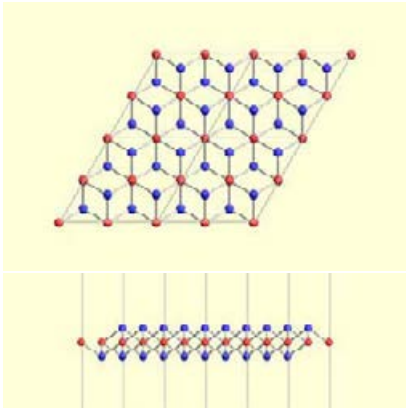

CaCl<sub>2</sub> (T)

×

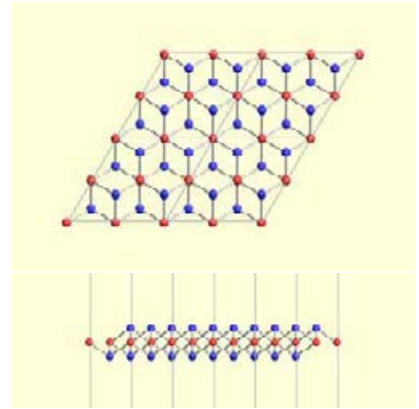

CaCl<sub>2</sub> (P)

×

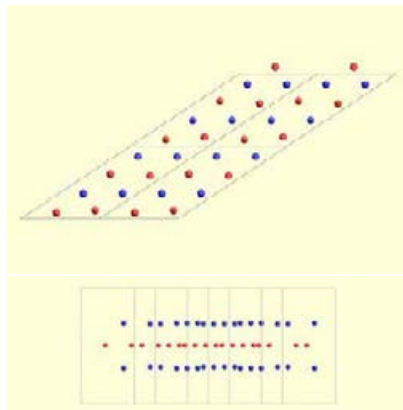

CaK<sub>2</sub> (H)

×



×

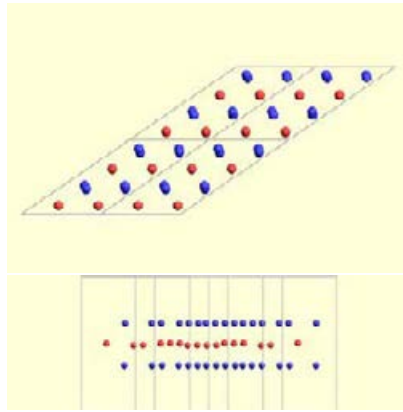

CaCr<sub>2</sub> (H)

×

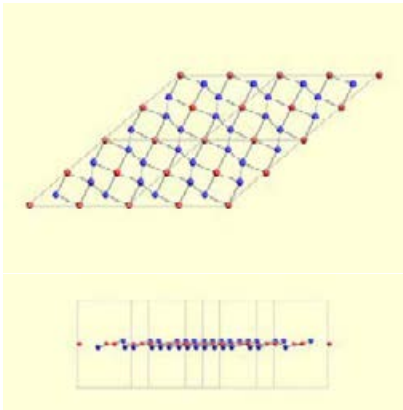

CaGe<sub>2</sub> (T)

×

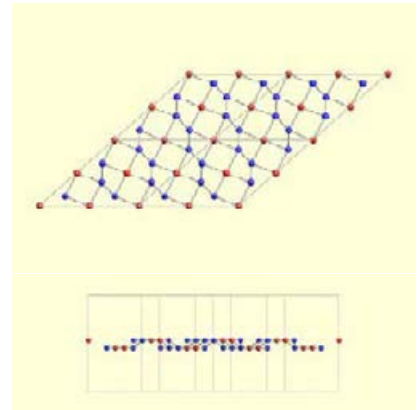

CaGe<sub>2</sub> (P)

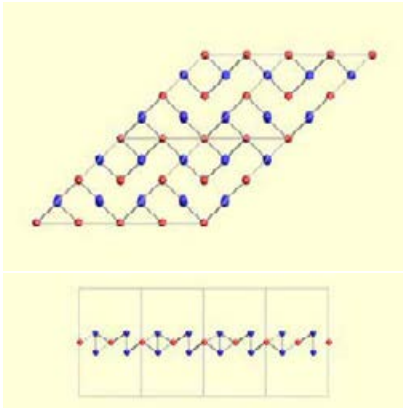

CaSe<sub>2</sub> (T)

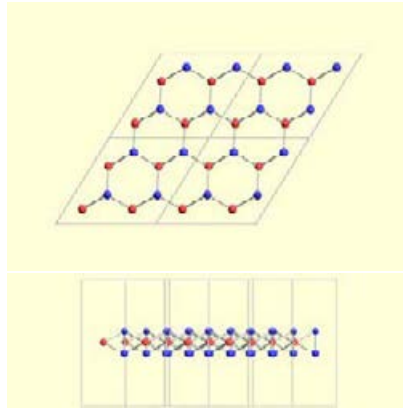

CaSe<sub>2</sub> (H)

×

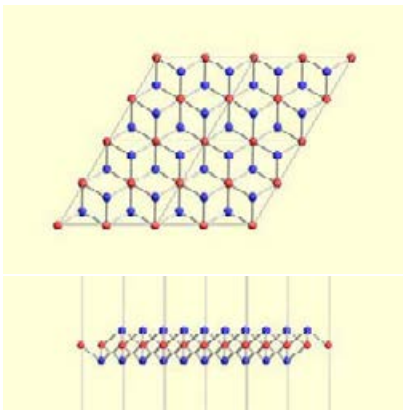

CaBr<sub>2</sub> (T)

×

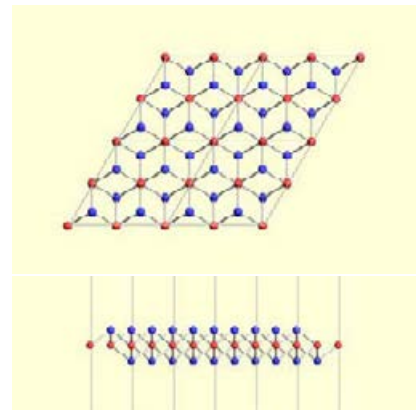

CaBr<sub>2</sub> (P)

×

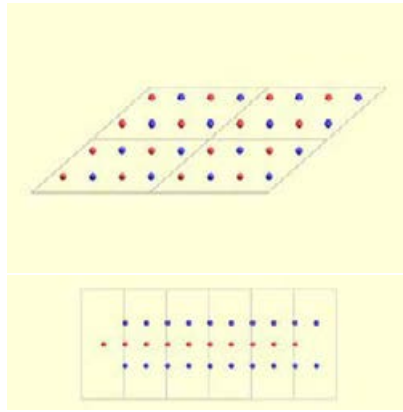

CaRb<sub>2</sub> (H)

×

×

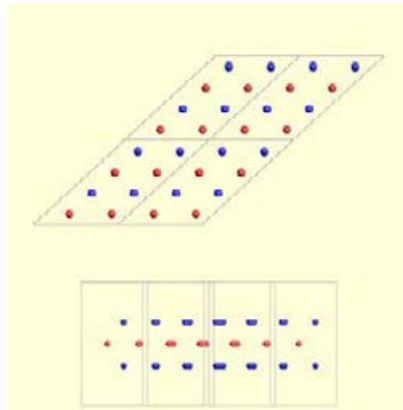

CaSr<sub>2</sub> (H)

×

×

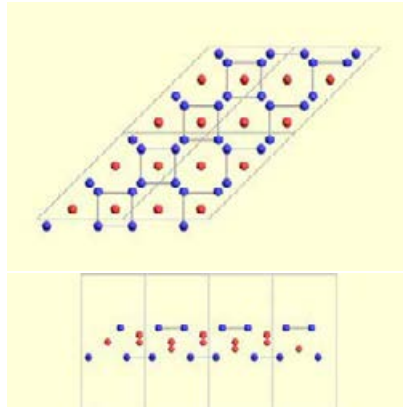

CaAg<sub>2</sub> (H)

×

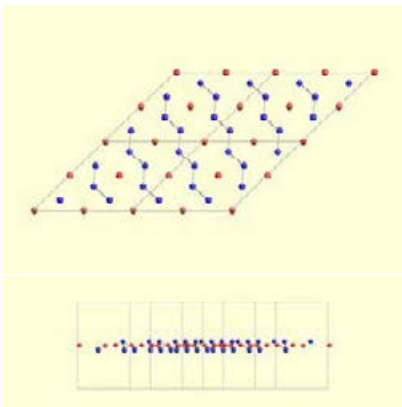

CaSn<sub>2</sub> (T)

×

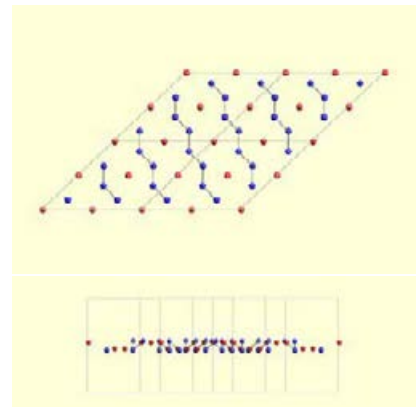

CaSn<sub>2</sub> (P)

×

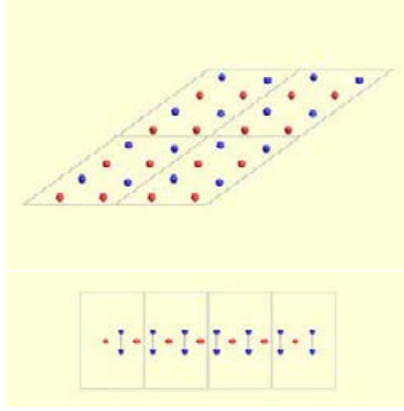

×

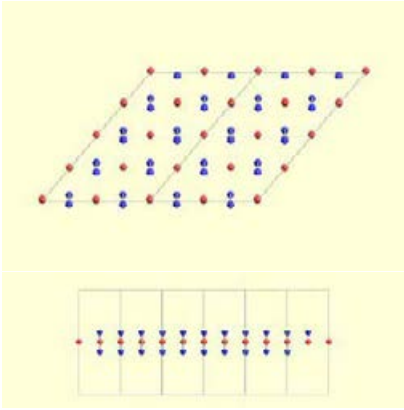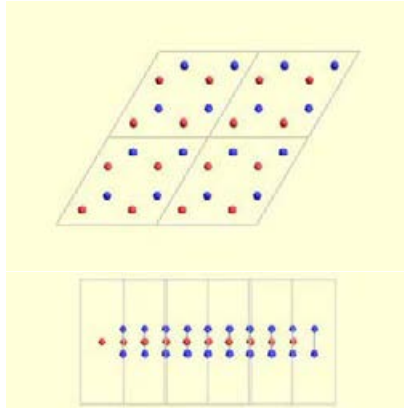

×

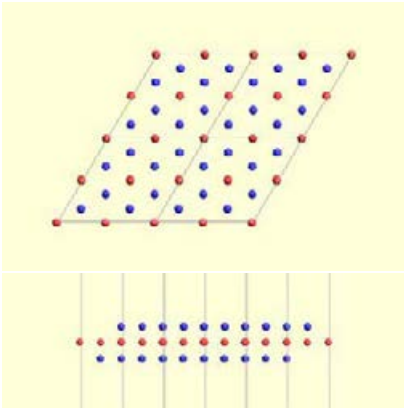

×

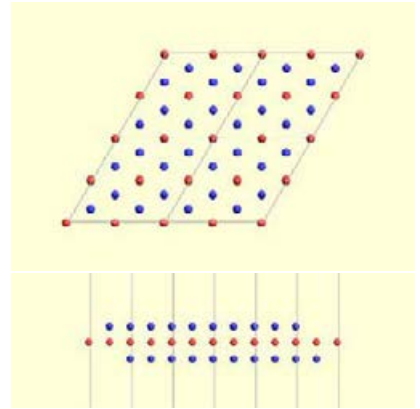

×

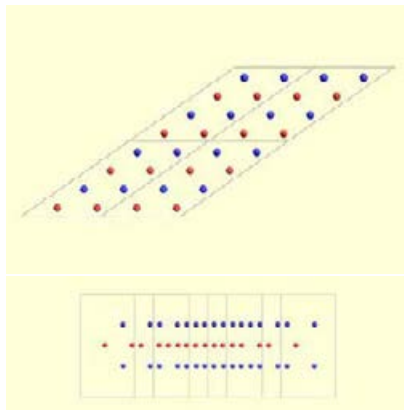

×

×

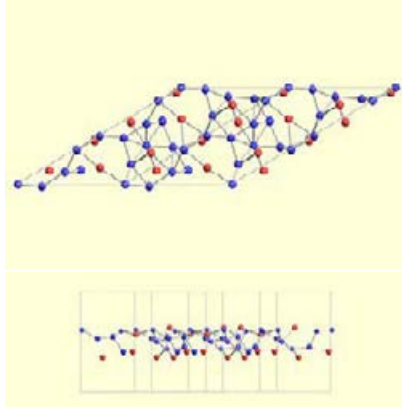

×

CaIr<sub>2</sub> (H)

×

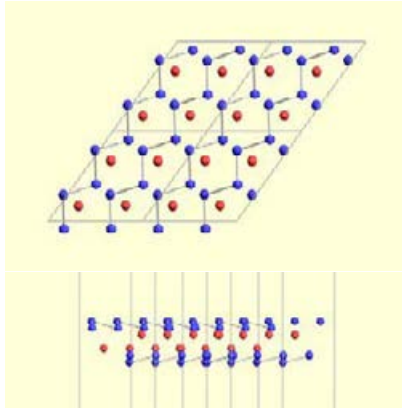

×

CaAu<sub>2</sub> (H)

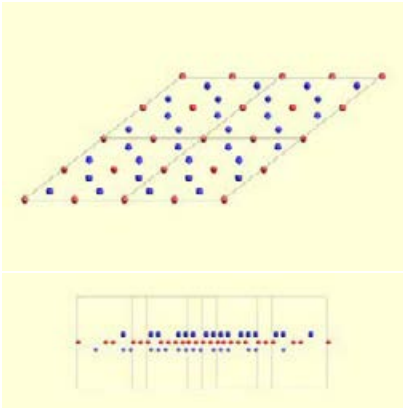

CaHg<sub>2</sub> (T)

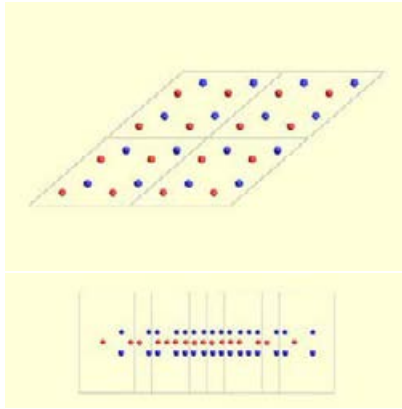

CaHg<sub>2</sub> (H)

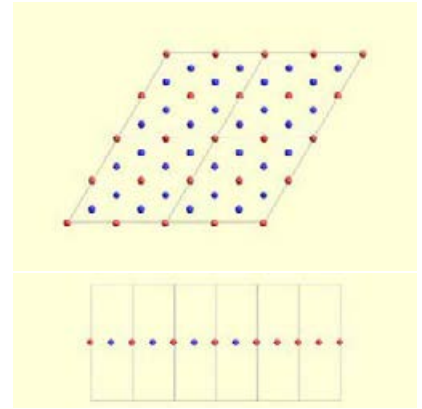

CaHg<sub>2</sub> (P)

×

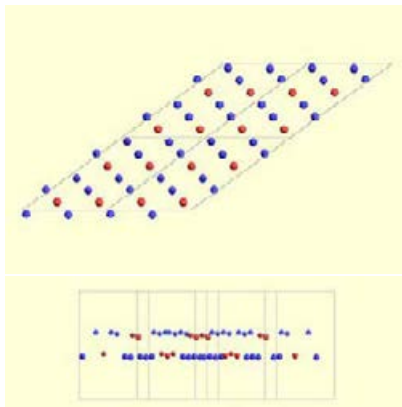

×

CaTl<sub>2</sub> (H)

×

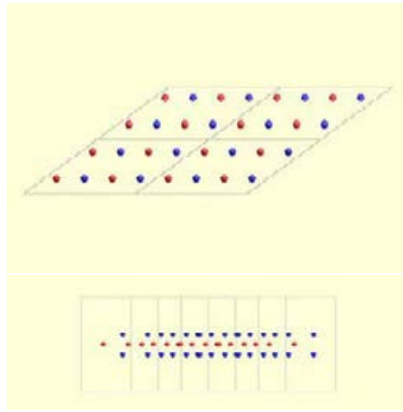

CaBi<sub>2</sub> (H)

×

×

×

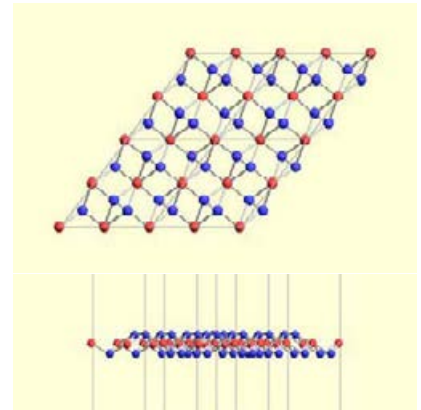

ScC<sub>2</sub> (P)

×

×

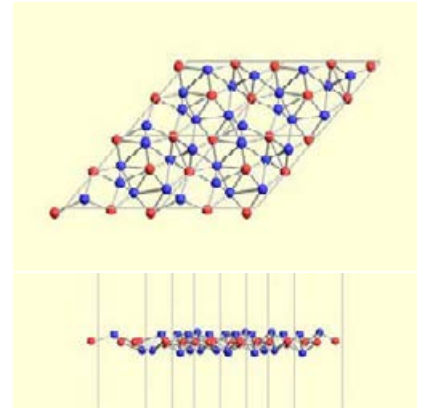

ScN<sub>2</sub> (P)

×

×

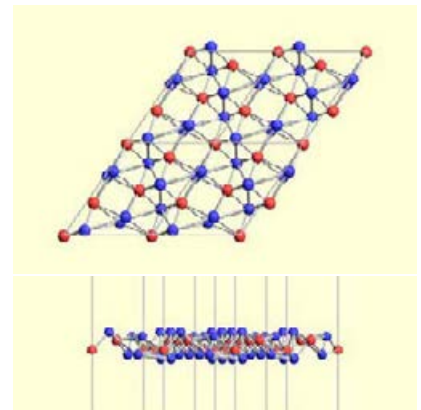

ScO<sub>2</sub> (P)



×

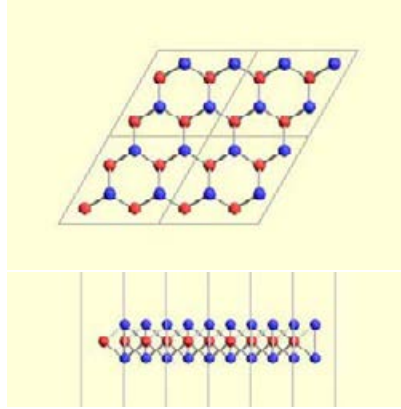

ScF<sub>2</sub> (H)

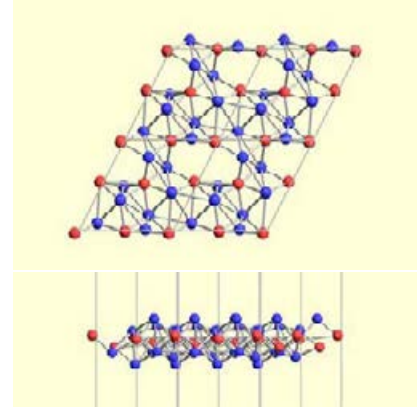

ScF<sub>2</sub> (P)

×

×

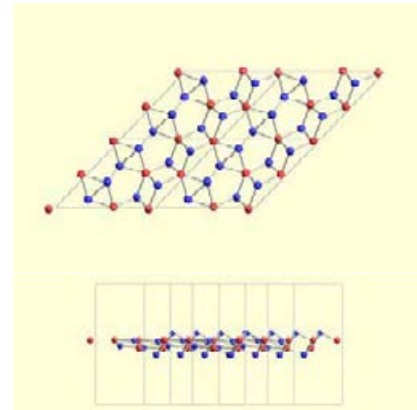

ScS<sub>2</sub> (P)

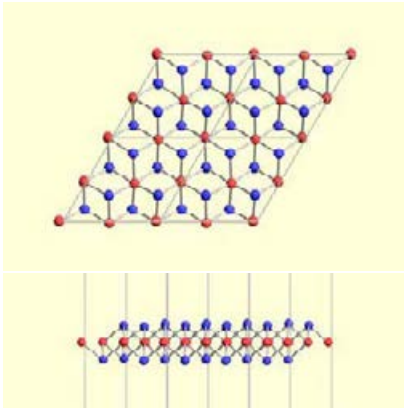

ScCl<sub>2</sub> (T)

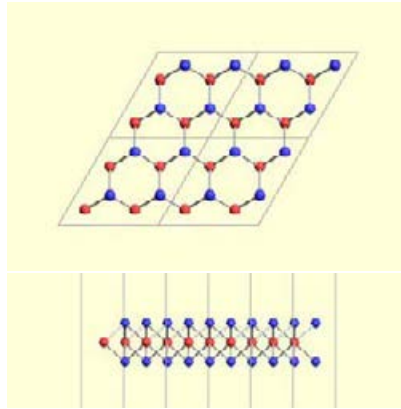

ScCl<sub>2</sub> (H)

×

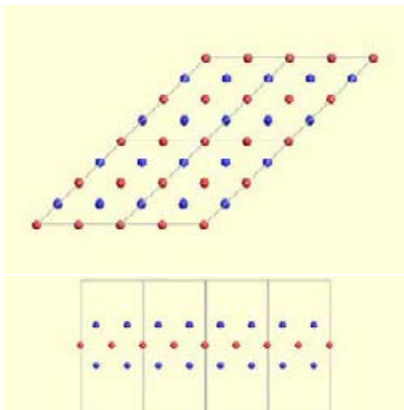

ScCa<sub>2</sub> (T)

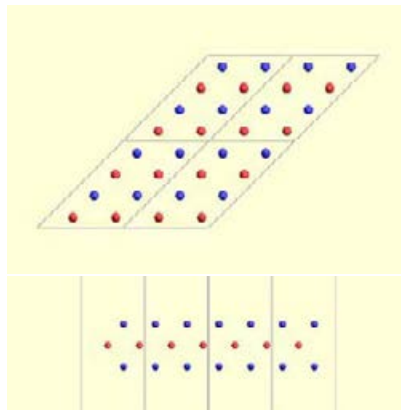

ScCa<sub>2</sub> (H)

×

×

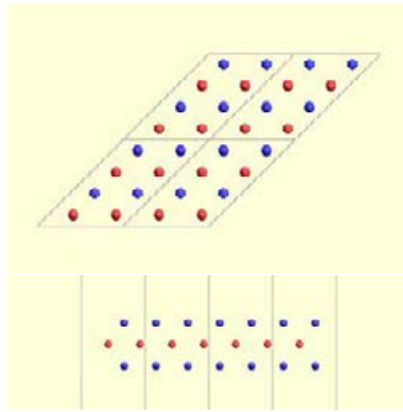

×

ScSc<sub>2</sub> (H)

×

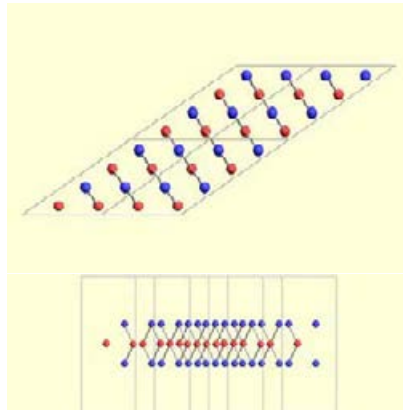

×

ScCr<sub>2</sub> (H)

×

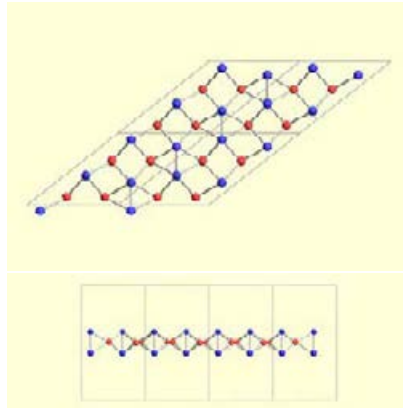

×

ScGe<sub>2</sub> (H)

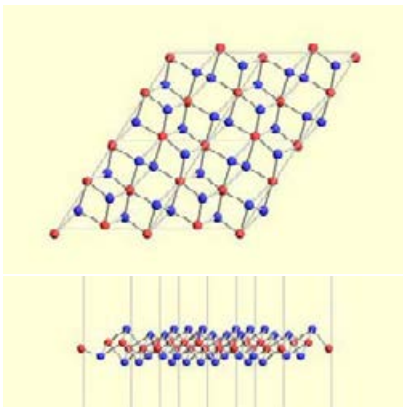

×

×

ScSe<sub>2</sub> (T)

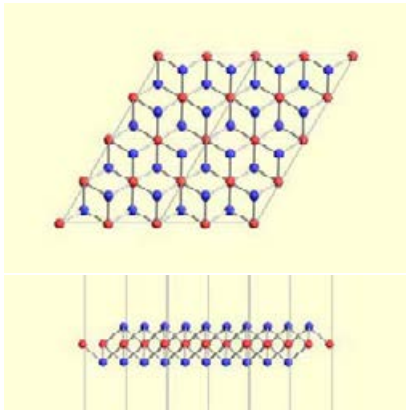

ScBr<sub>2</sub> (T)

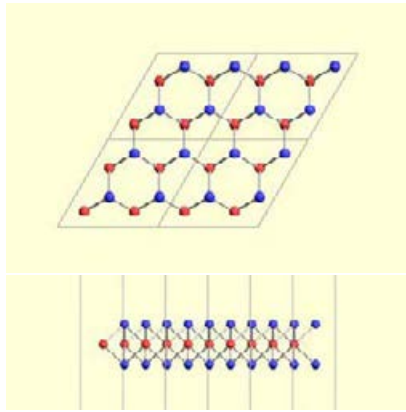

ScBr<sub>2</sub> (H)

×

×

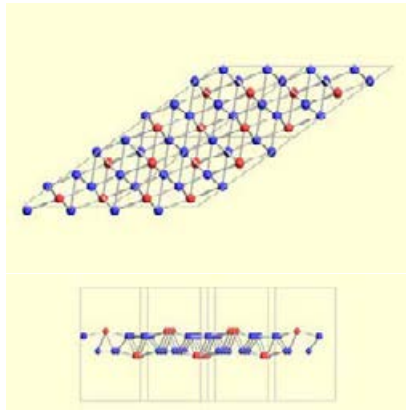

ScTc<sub>2</sub> (H)

×

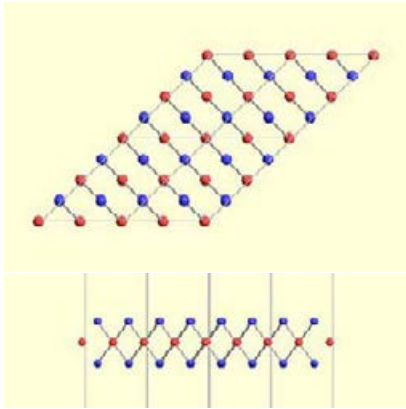

ScAg<sub>2</sub> (T)

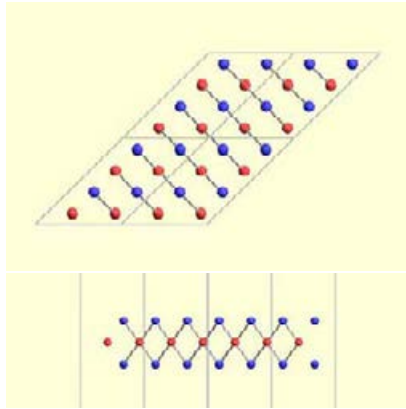

ScAg<sub>2</sub> (H)

×

×

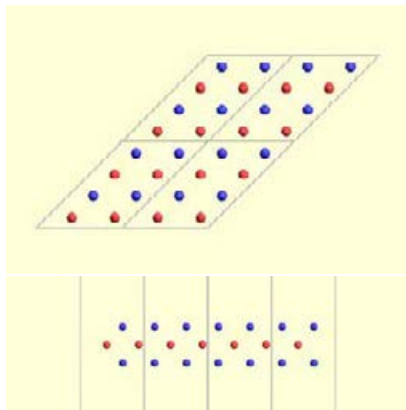

ScIn<sub>2</sub> (H)

×

×

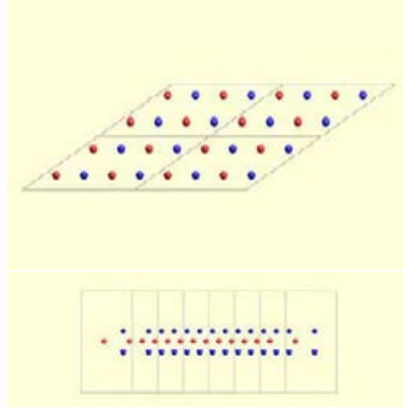

ScSn<sub>2</sub> (H)

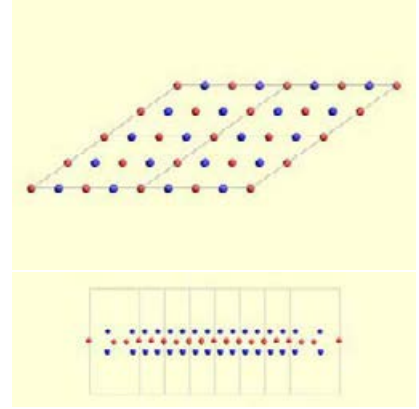

ScSn<sub>2</sub> (P)

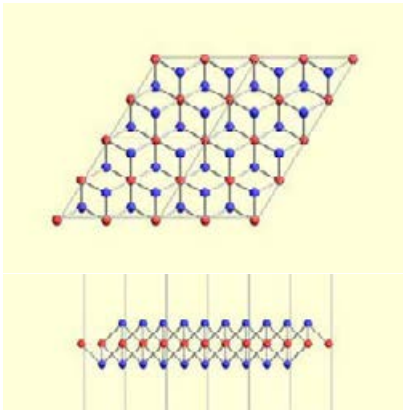

ScTe<sub>2</sub> (T)

×

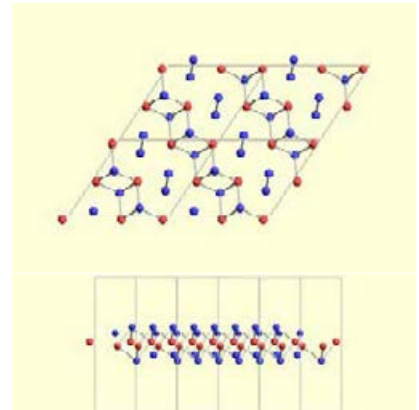

ScTe<sub>2</sub> (P)

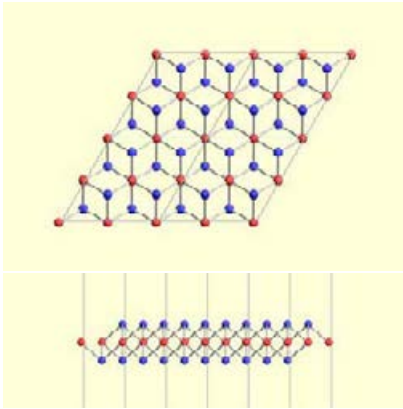

ScI<sub>2</sub> (T)

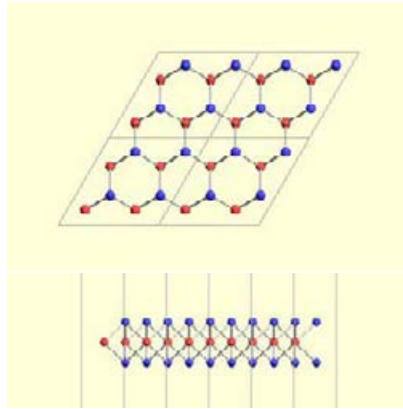

ScI<sub>2</sub> (H)

×

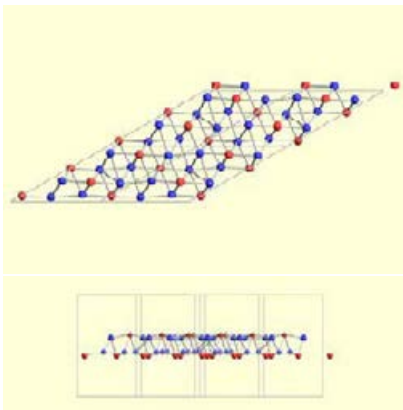

ScPt<sub>2</sub> (T)

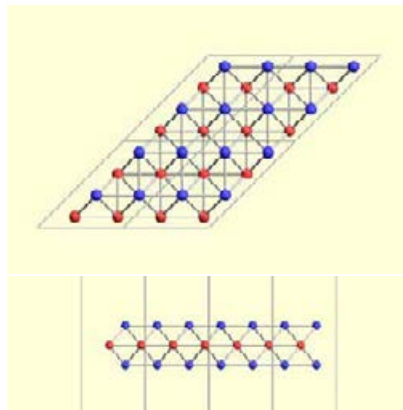

ScPt<sub>2</sub> (H)

×

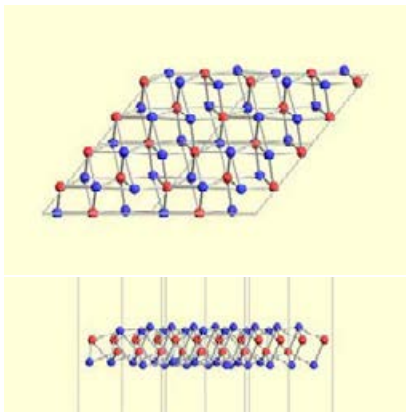

ScAu<sub>2</sub> (T)

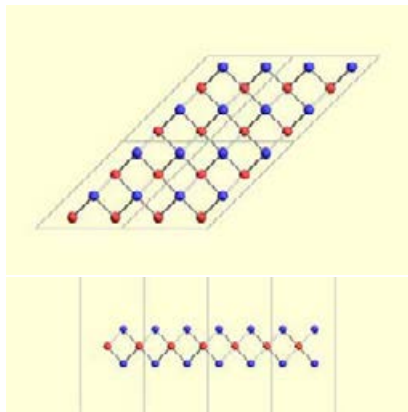

ScAu<sub>2</sub> (H)

×

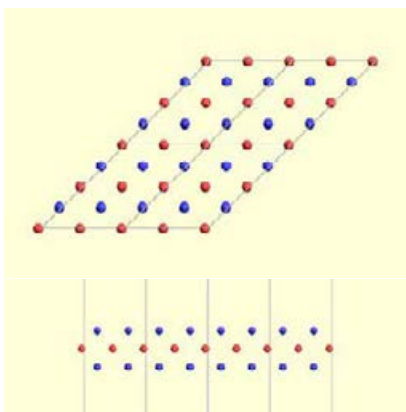

ScHg<sub>2</sub> (T)

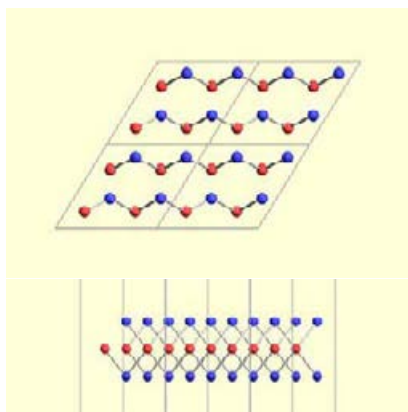

ScHg<sub>2</sub> (H)

×

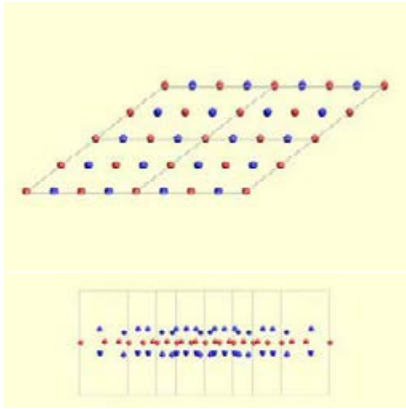

ScPb<sub>2</sub> (T)

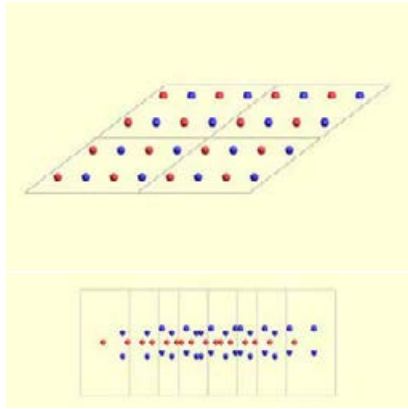

ScPb<sub>2</sub> (H)

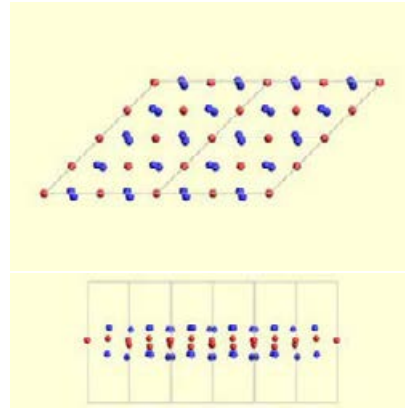

ScPb<sub>2</sub> (P)

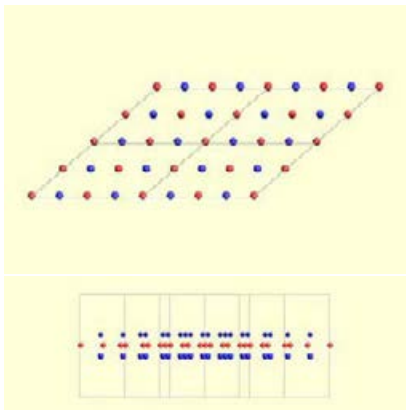

ScBi<sub>2</sub> (T)

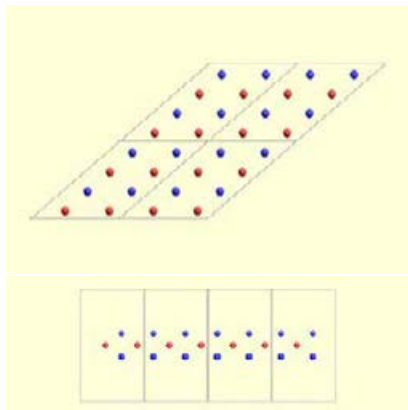

ScBi<sub>2</sub> (H)

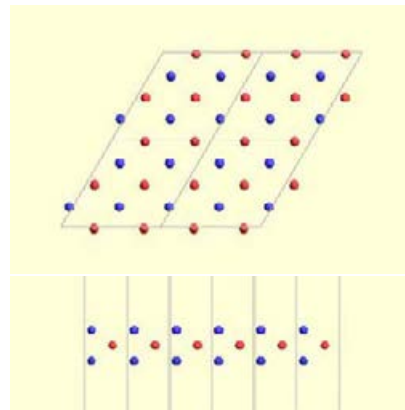

ScBi<sub>2</sub> (P)



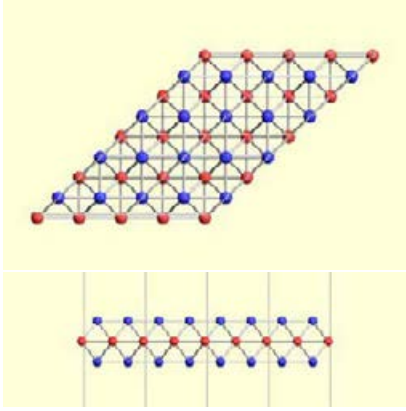

TiBe<sub>2</sub> (T)

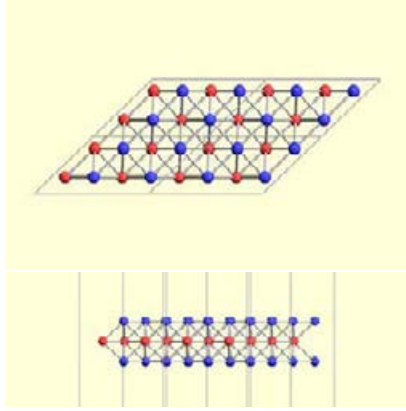

TiBe<sub>2</sub> (H)

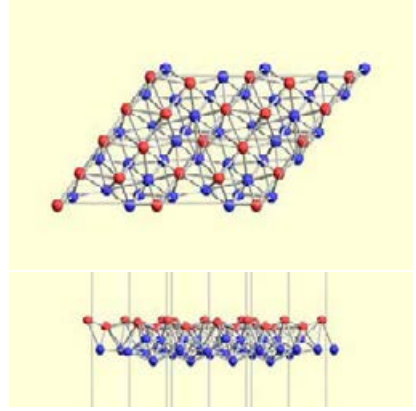

TiBe<sub>2</sub> (P)

×

×

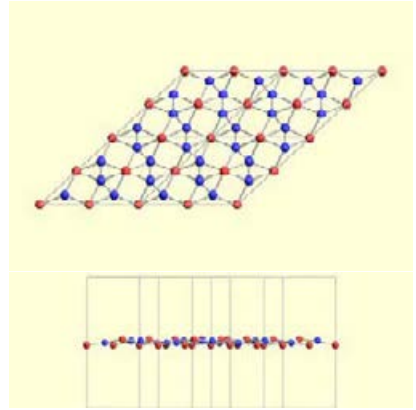

TiB<sub>2</sub> (P)

×

×

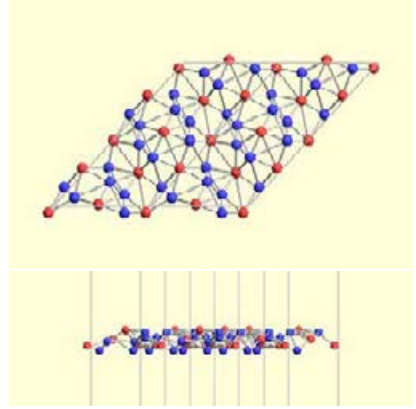

TiC<sub>2</sub> (P)

×

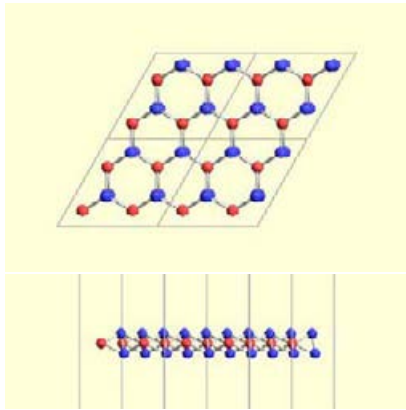

TiN<sub>2</sub> (H)

×

×

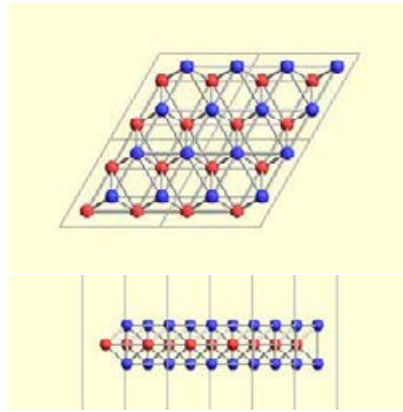

×

$\text{TiF}_2$  (H)

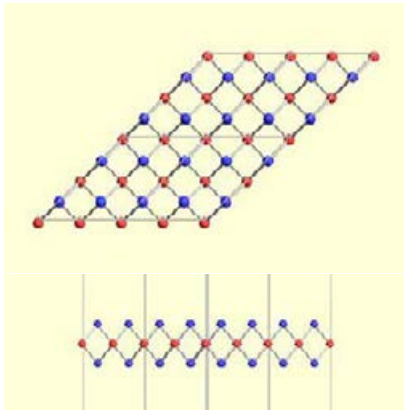

$\text{TiMg}_2$  (T)

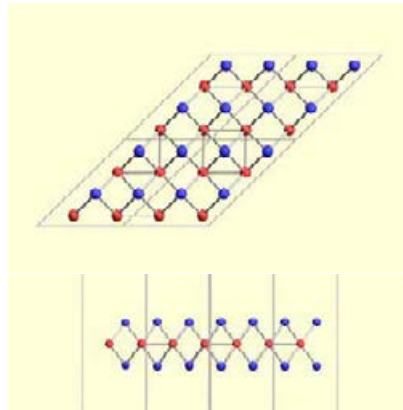

$\text{TiMg}_2$  (H)

×

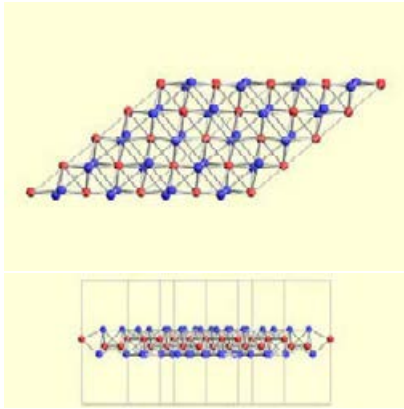

$\text{TiAl}_2$  (T)

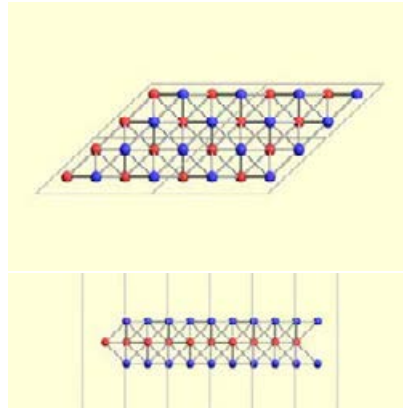

$\text{TiAl}_2$  (H)

×

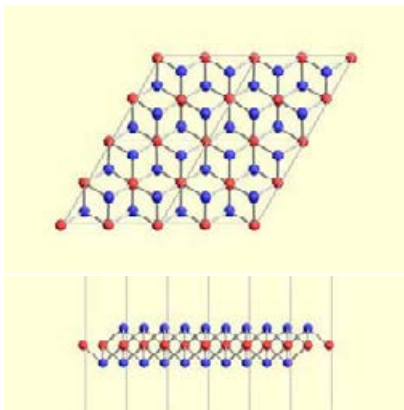

$\text{TiS}_2$  (T)

×

×

×

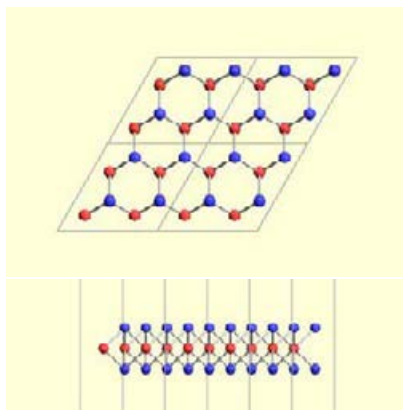

$\text{TiCl}_2$  (H)

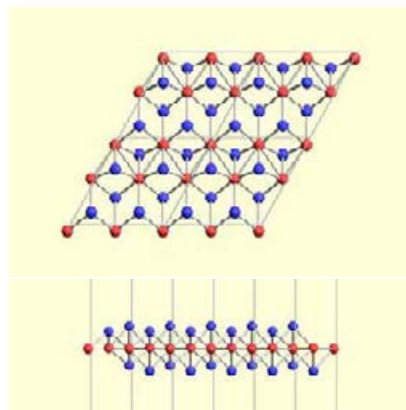

$\text{TiCl}_2$  (P)

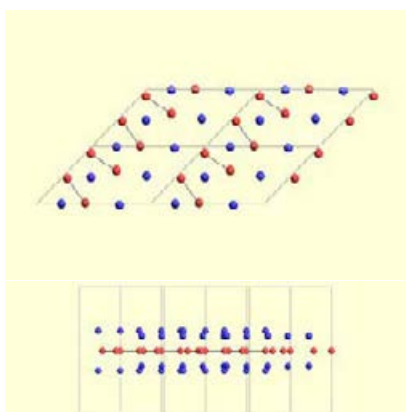

$\text{TiCa}_2$  (T)

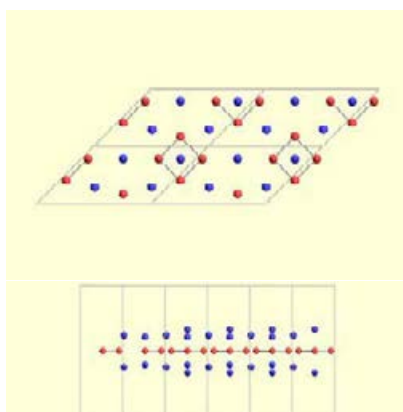

$\text{TiCa}_2$  (H)

×

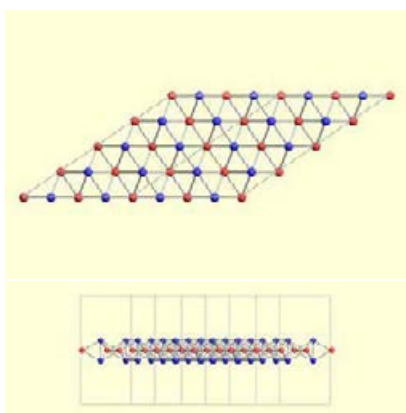

$\text{TiGe}_2$  (T)

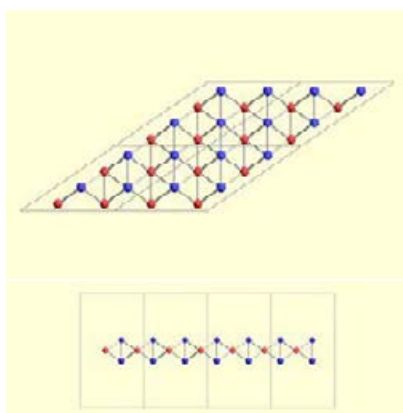

$\text{TiGe}_2$  (H)

×

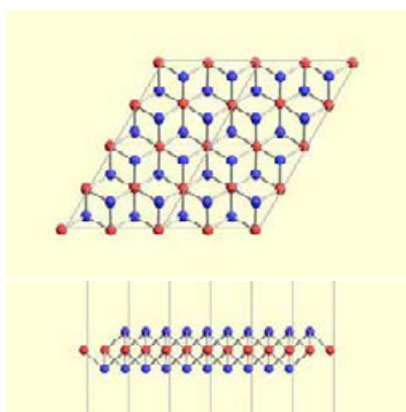

$\text{TiSe}_2$  (T)

×

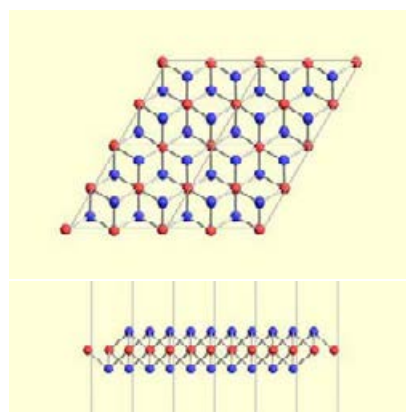

$\text{TiSe}_2$  (P)

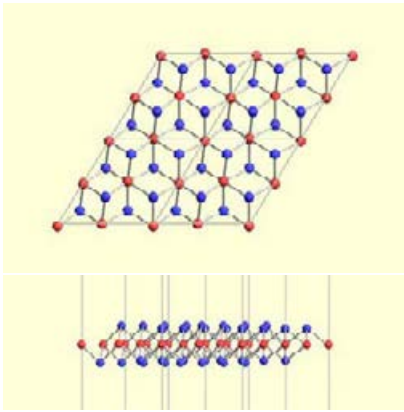

TiBr<sub>2</sub> (T)

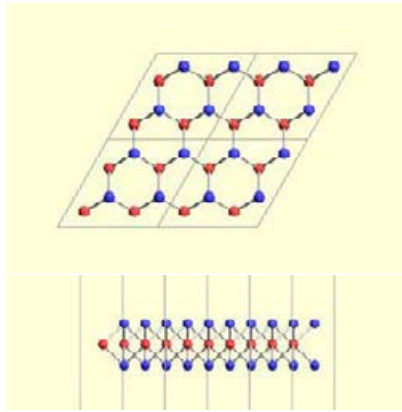

TiBr<sub>2</sub> (H)

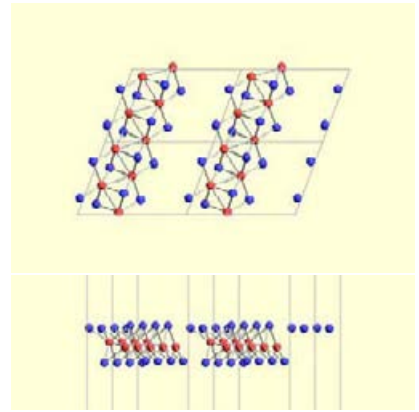

TiBr<sub>2</sub> (P)

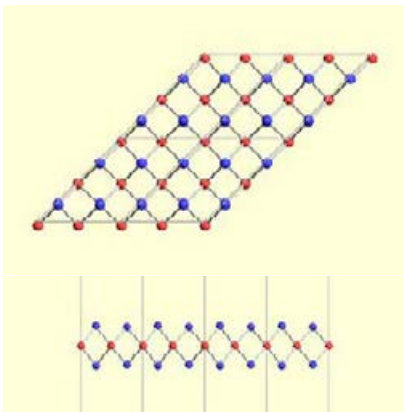

TiIn<sub>2</sub> (T)

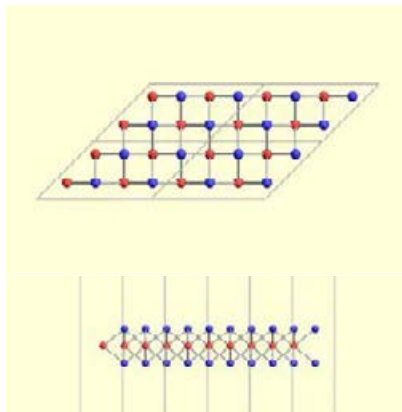

TiIn<sub>2</sub> (H)

×

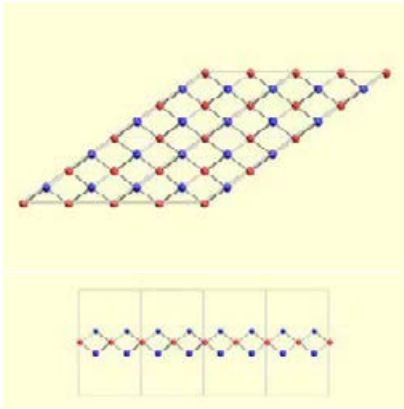

TiSn<sub>2</sub> (T)

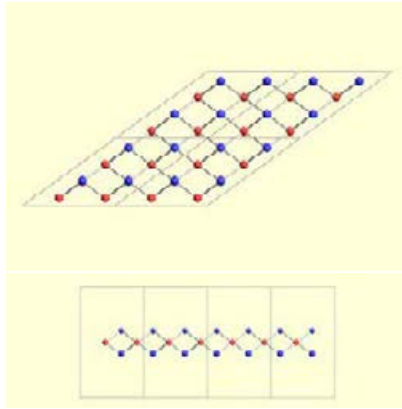

TiSn<sub>2</sub> (H)

×

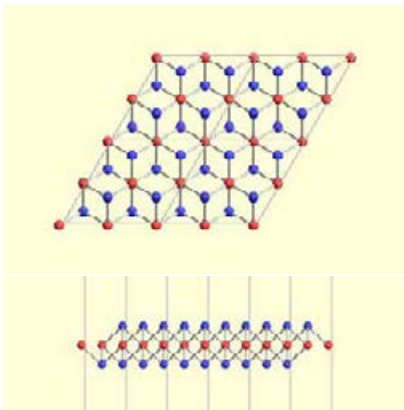

TiTe<sub>2</sub> (T)

×

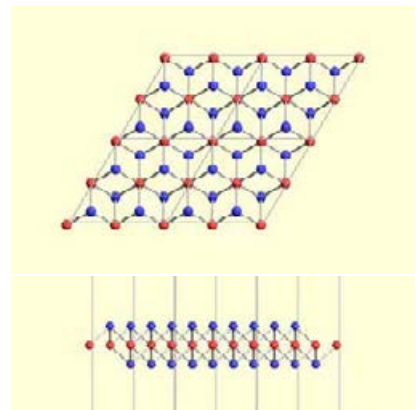

TiTe<sub>2</sub> (P)

×

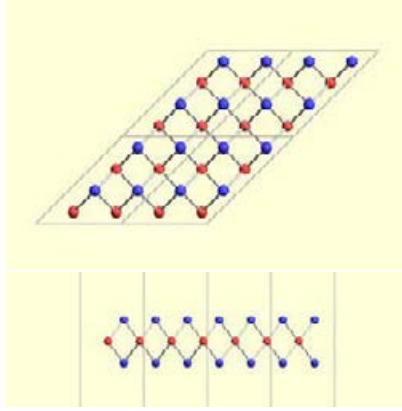

$\text{TiHf}_2$  (H)

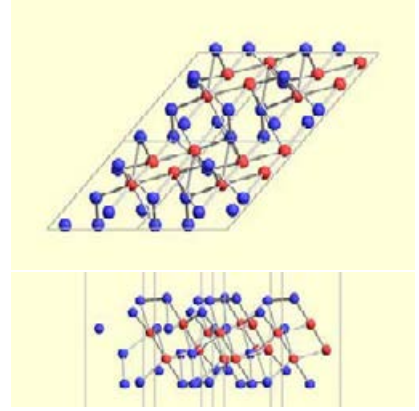

$\text{TiHf}_2$  (P)

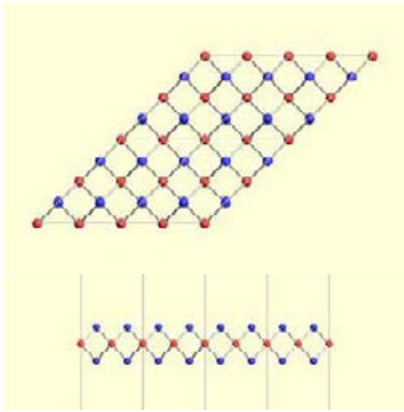

$\text{TiTi}_2$  (T)

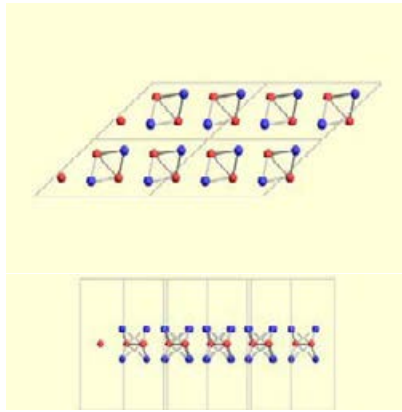

$\text{TiTi}_2$  (H)

×

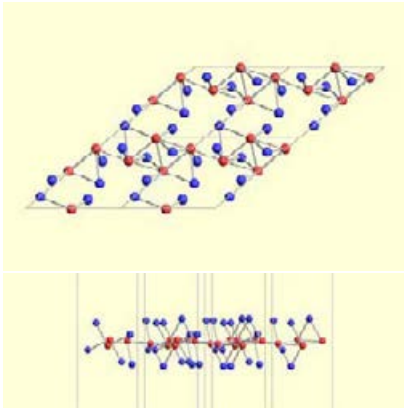

$\text{TiBi}_2$  (T)

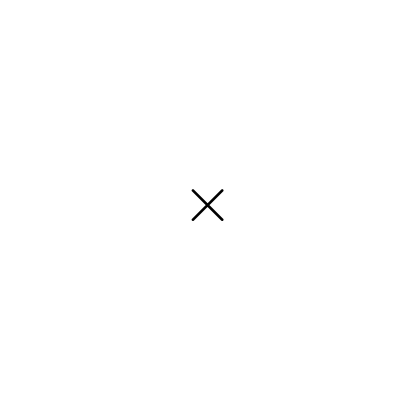

$\text{TiBi}_2$  (P)

×

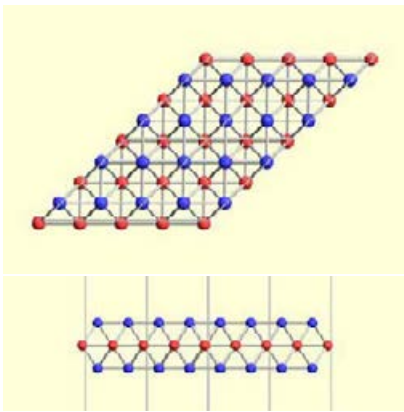

$\text{VBe}_2$  (T)

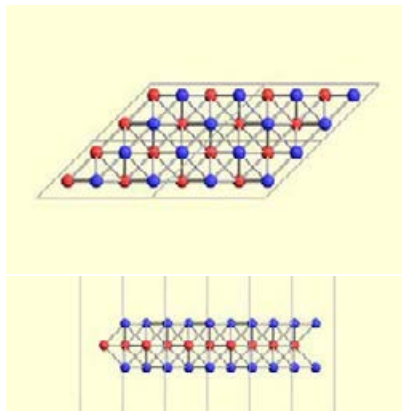

$\text{VBe}_2$  (H)

×



×

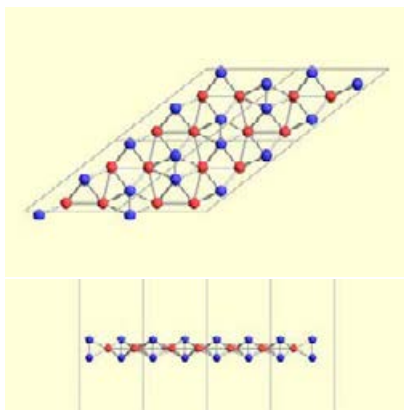

VB<sub>2</sub> (H)

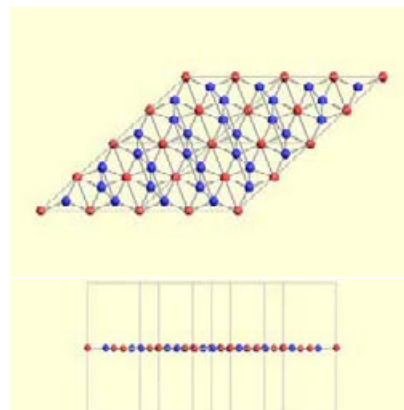

VB<sub>2</sub> (P)

×

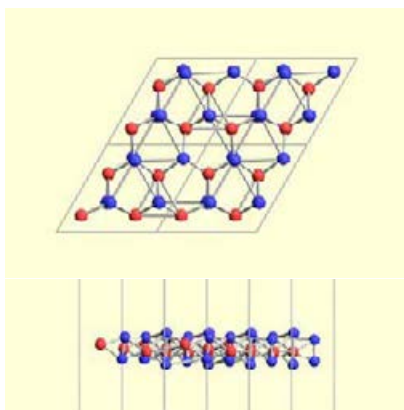

VN<sub>2</sub> (H)

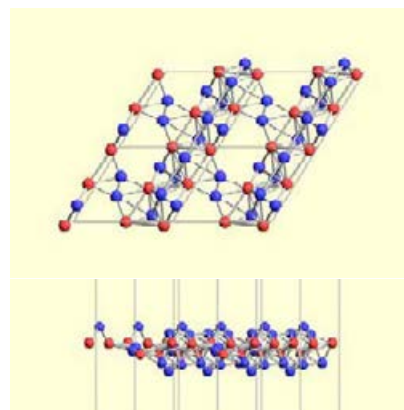

VN<sub>2</sub> (P)

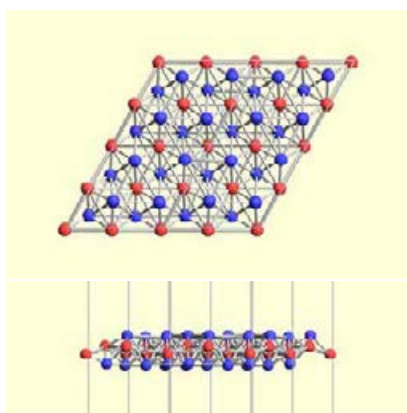

VO<sub>2</sub> (T)

×

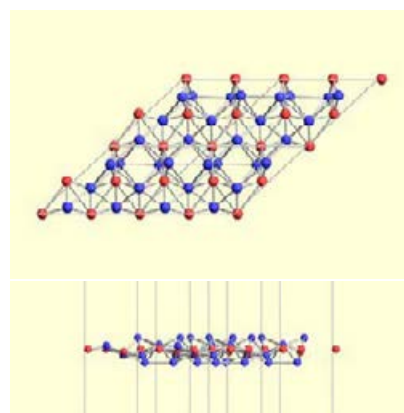

VO<sub>2</sub> (P)

×

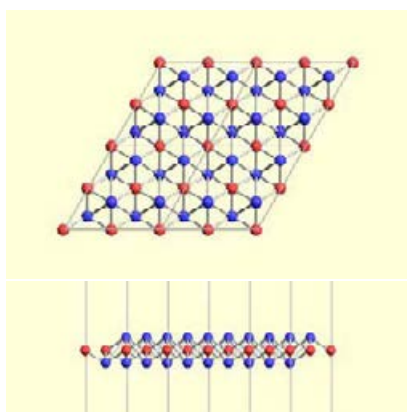

VF<sub>2</sub> (T)

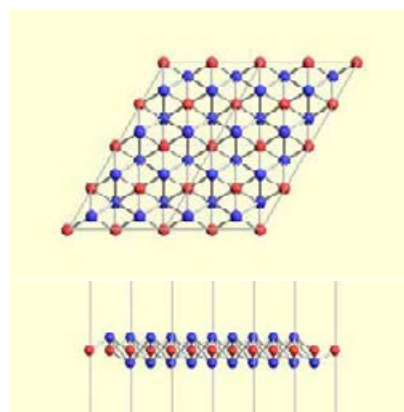

VF<sub>2</sub> (P)

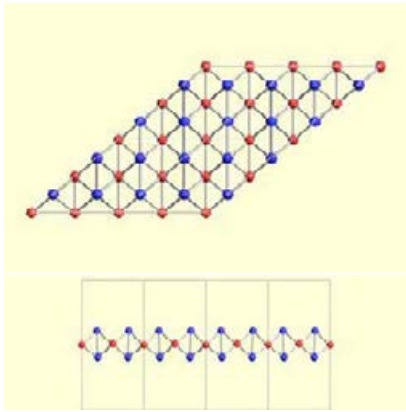

VA12 (T)

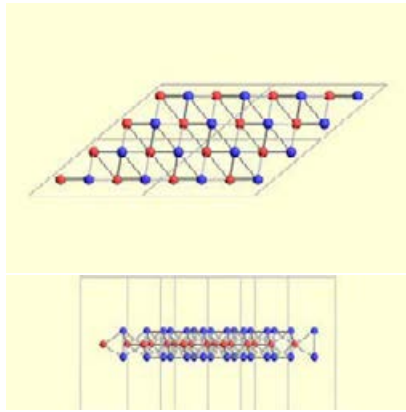

VA12 (H)

×

×

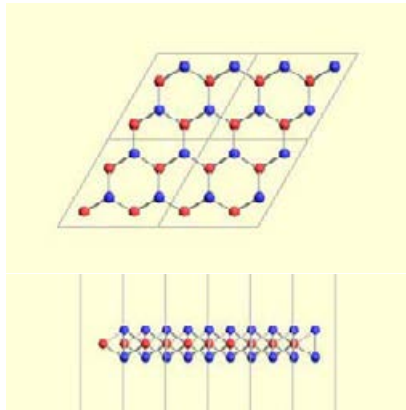

VP2 (H)

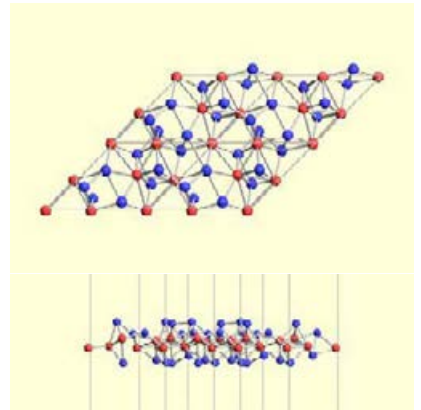

VP2 (P)

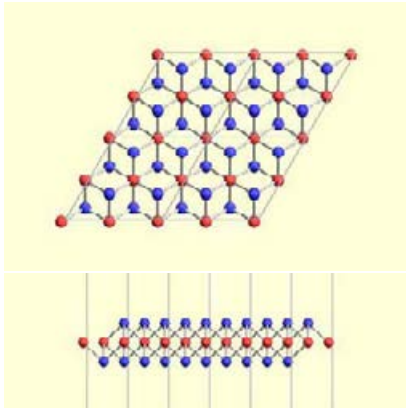

VS2 (T)

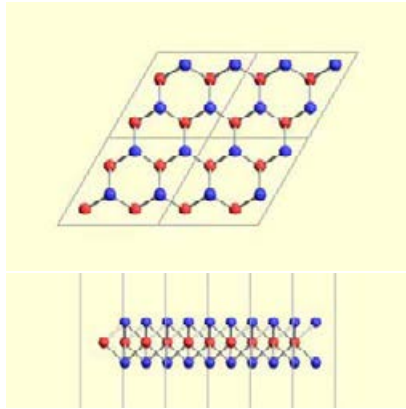

VS2 (H)

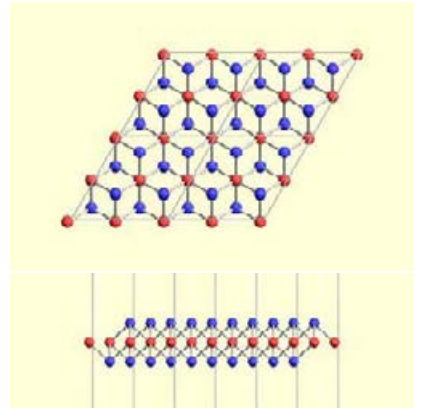

VS2 (P)

×

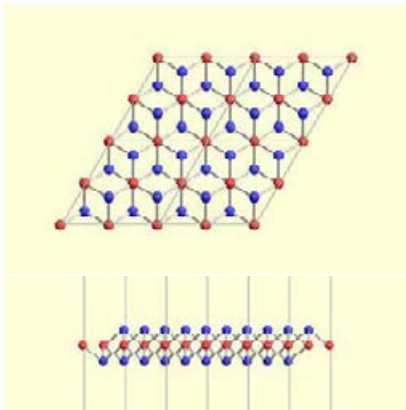

VCl2 (T)

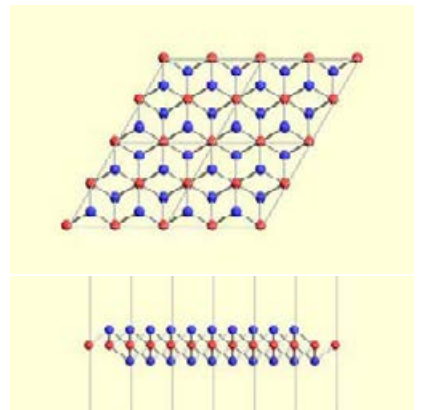

VCl2 (P)

×

×

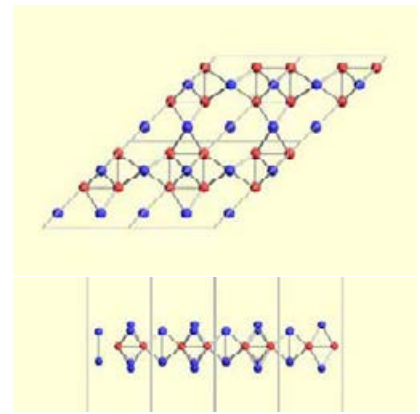

VSc<sub>2</sub> (P)

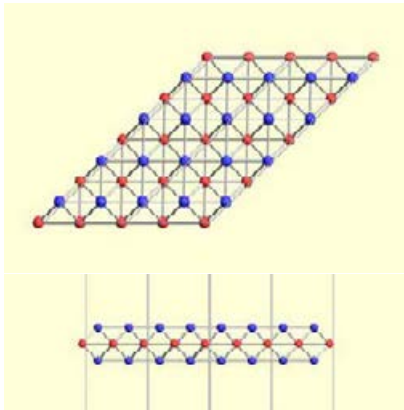

VTi<sub>2</sub> (T)

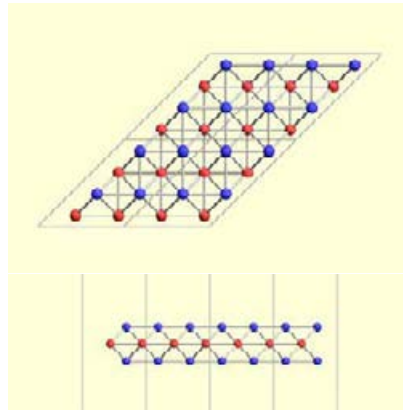

VTi<sub>2</sub> (H)

×

×

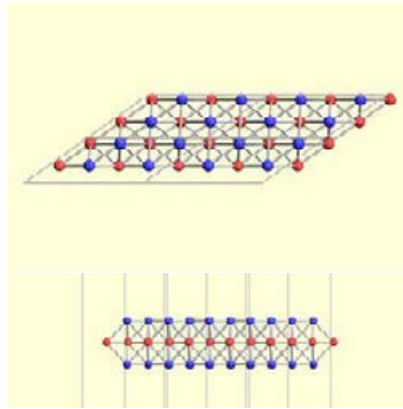

VV<sub>2</sub> (H)

×

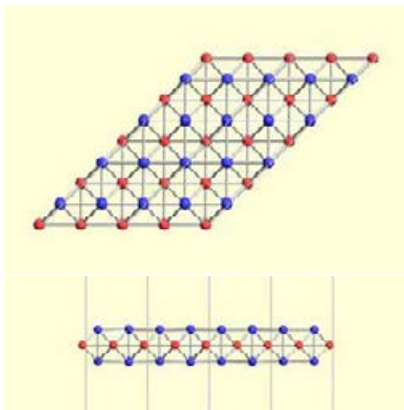

VMn<sub>2</sub> (T)

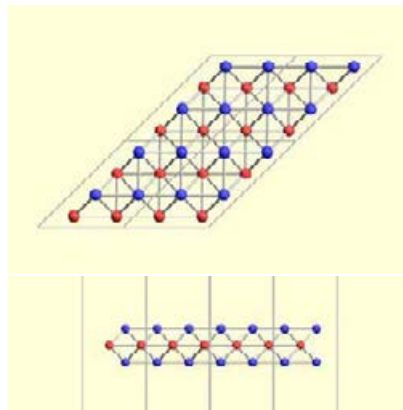

VMn<sub>2</sub> (H)

×

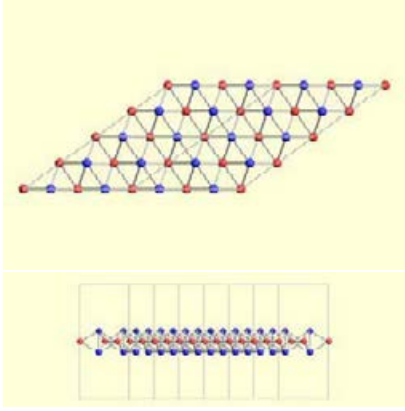

VGe<sub>2</sub> (T)

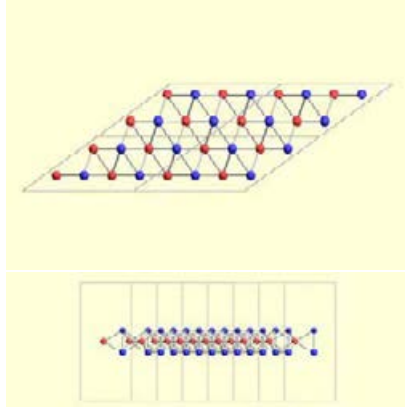

VGe<sub>2</sub> (H)

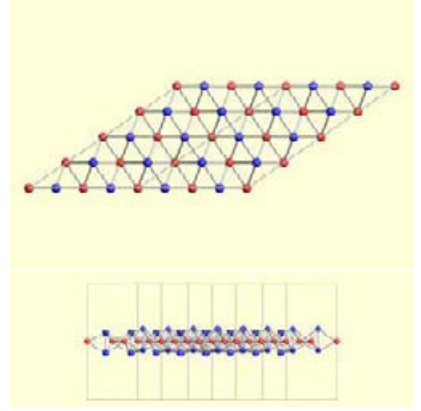

VGe<sub>2</sub> (P)

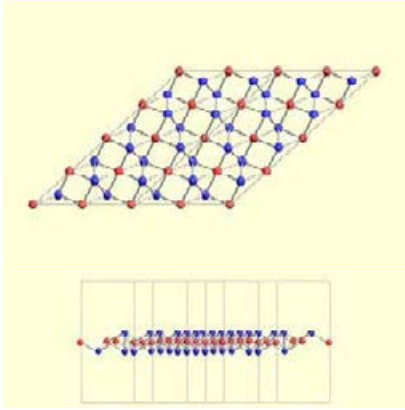

VAs<sub>2</sub> (T)

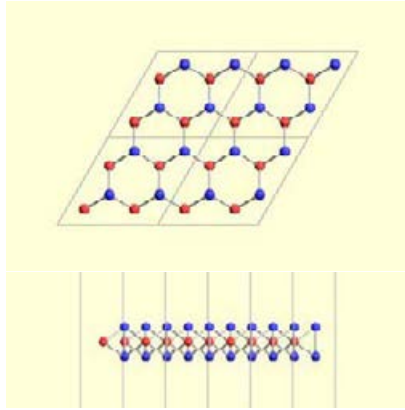

VAs<sub>2</sub> (H)

×

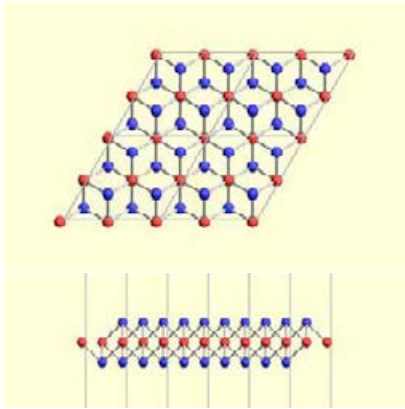

VSe<sub>2</sub> (T)

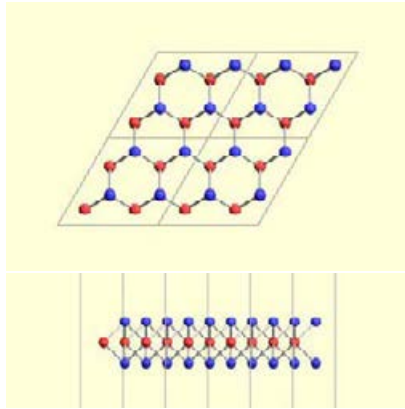

VSe<sub>2</sub> (H)

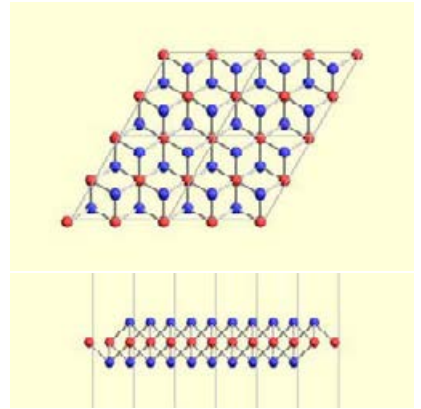

VSe<sub>2</sub> (P)

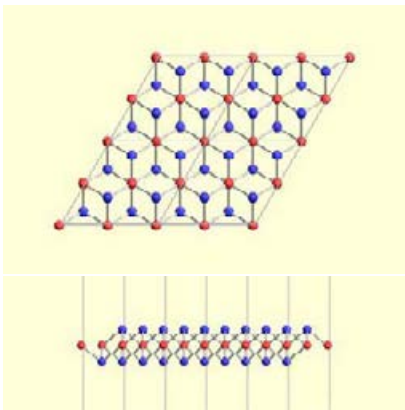

VBr<sub>2</sub> (T)

×

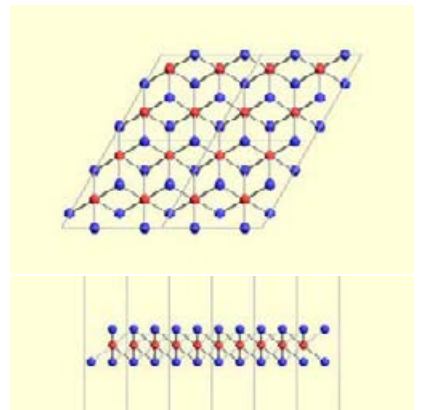

VBr<sub>2</sub> (P)



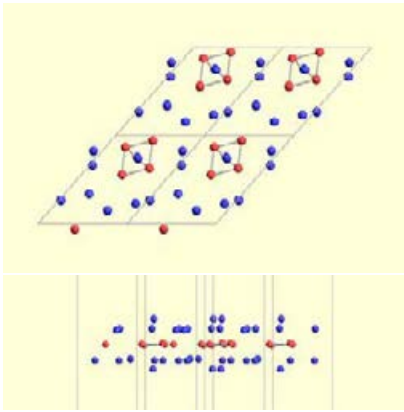

VSr<sub>2</sub> (T)

×

×

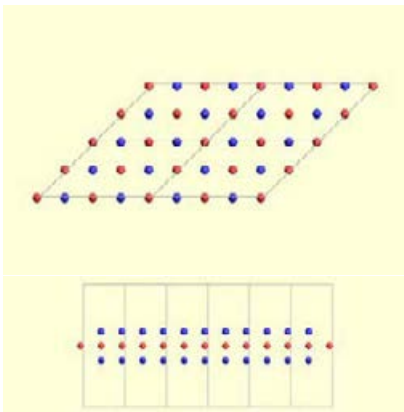

VY<sub>2</sub> (T)

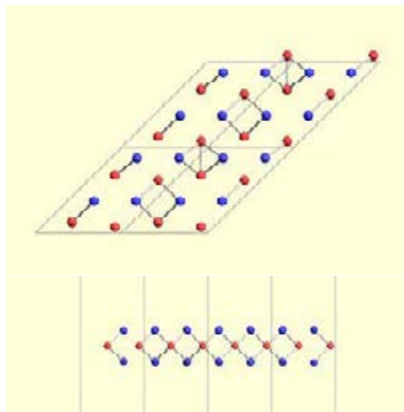

VY<sub>2</sub> (H)

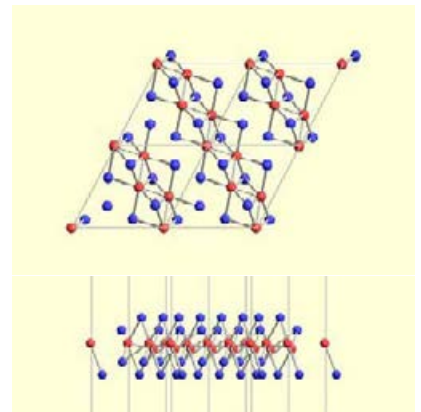

VY<sub>2</sub> (P)

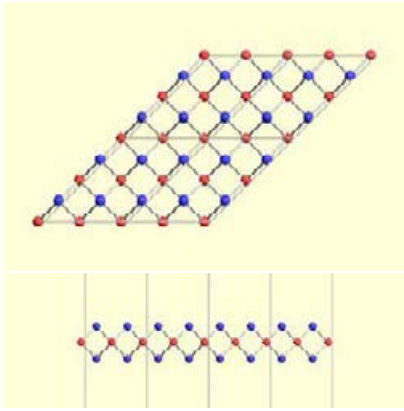

VZr<sub>2</sub> (T)

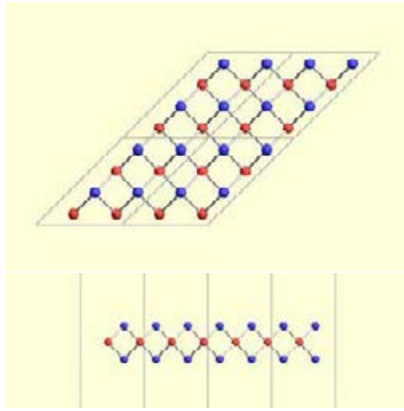

VZr<sub>2</sub> (H)

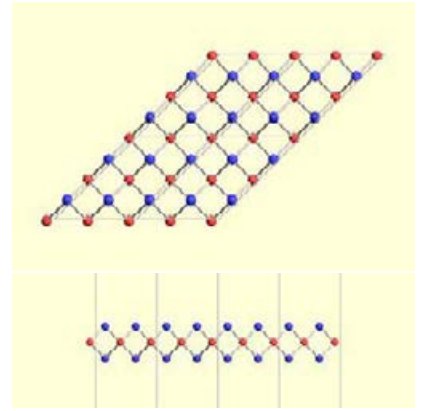

VZr<sub>2</sub> (P)

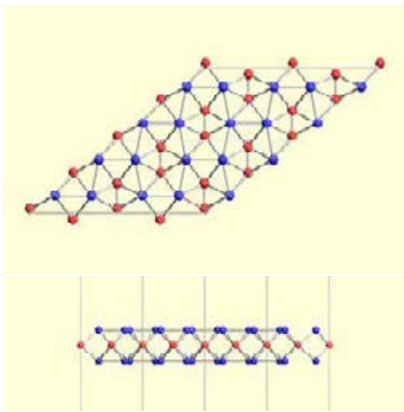

VCd<sub>2</sub> (T)

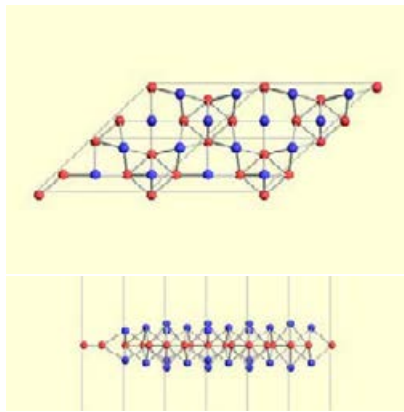

VCd<sub>2</sub> (H)

×



×

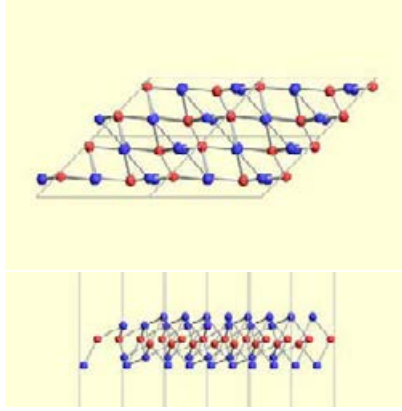

$\text{VSn}_2$  (H)

×

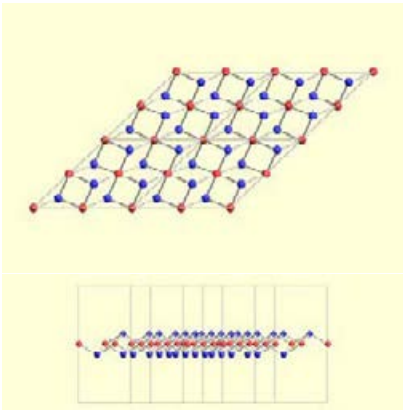

$\text{VSb}_2$  (T)

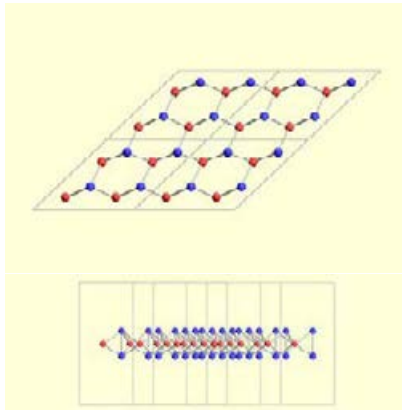

$\text{VSb}_2$  (H)

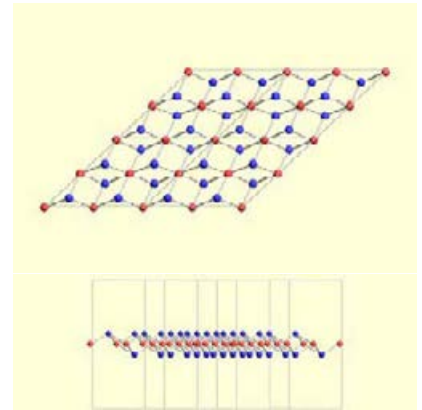

$\text{VSb}_2$  (P)

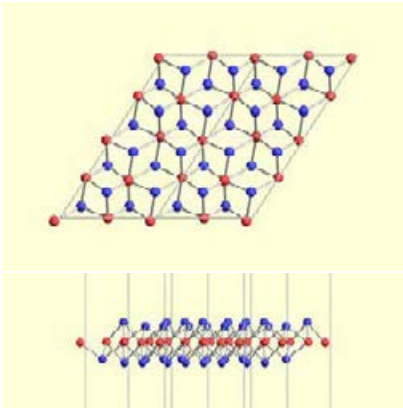

$\text{VTe}_2$  (T)

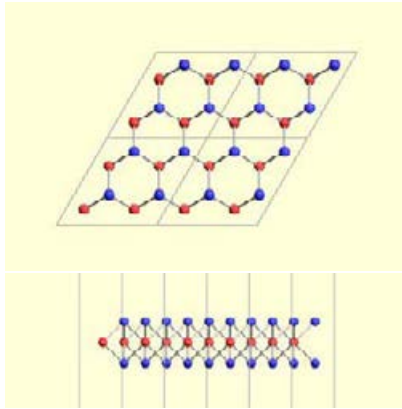

$\text{VTe}_2$  (H)

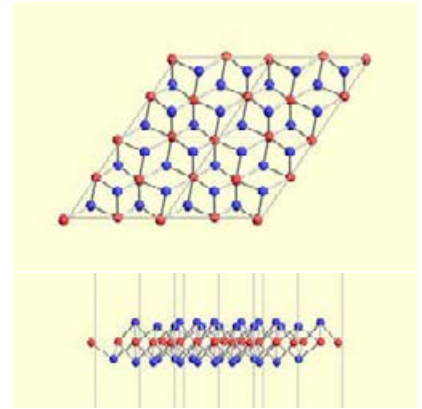

$\text{VTe}_2$  (P)

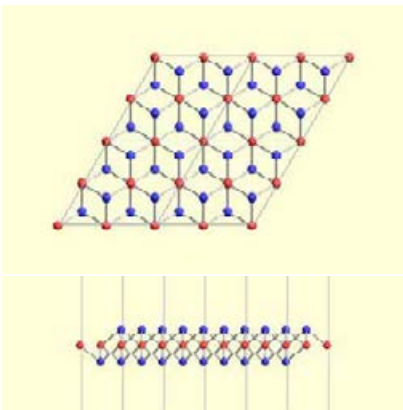

$\text{VI}_2$  (T)

×

×

×

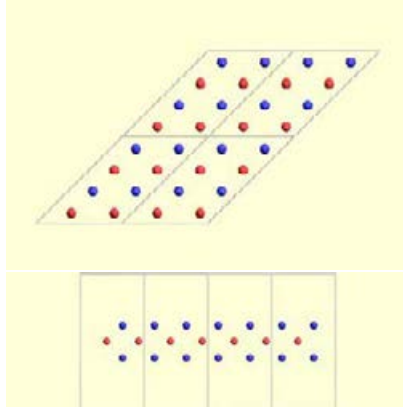

VPb<sub>2</sub> (H)

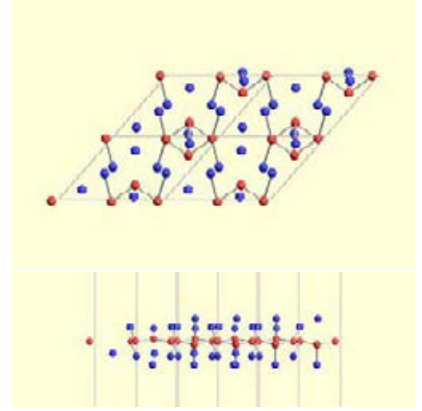

VPb<sub>2</sub> (P)

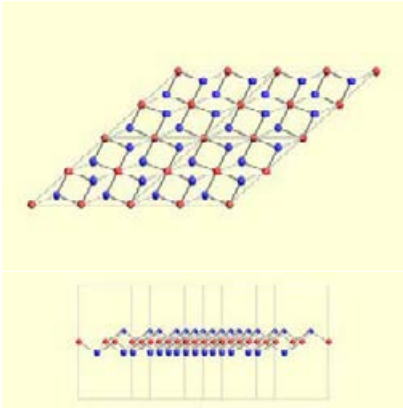

VBi<sub>2</sub> (T)

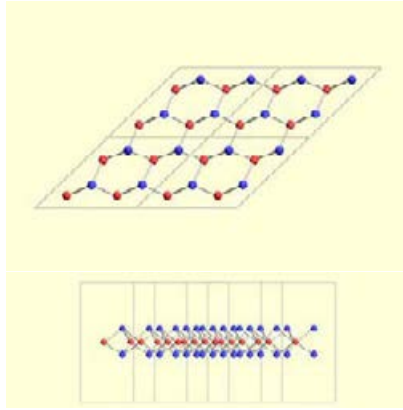

VBi<sub>2</sub> (H)

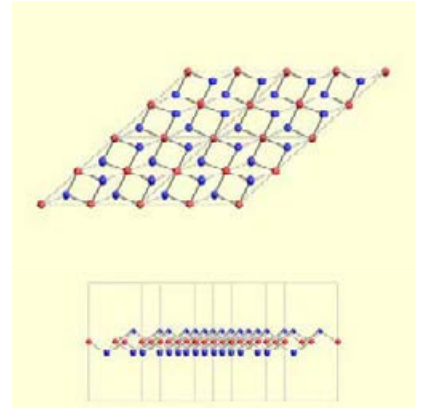

VBi<sub>2</sub> (P)

×

×

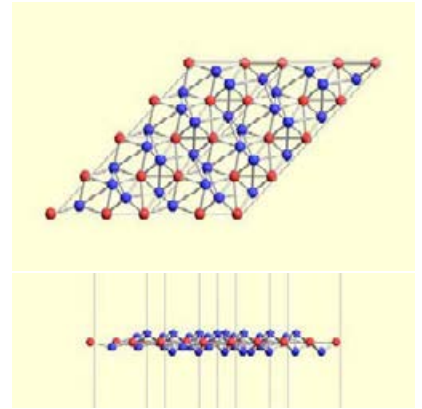

CrC<sub>2</sub> (P)

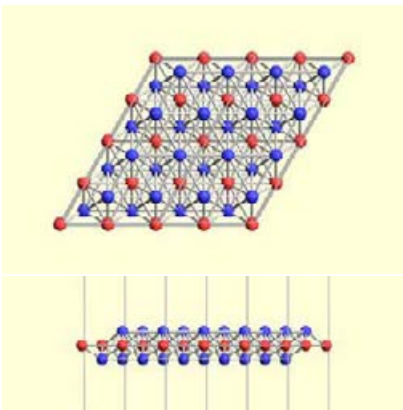

CrO<sub>2</sub> (T)

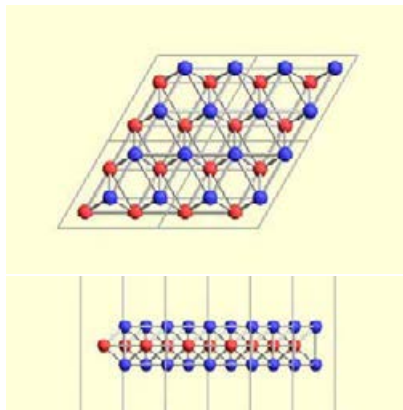

CrO<sub>2</sub> (H)

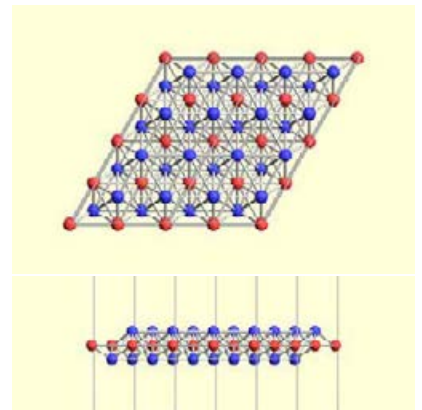

CrO<sub>2</sub> (P)

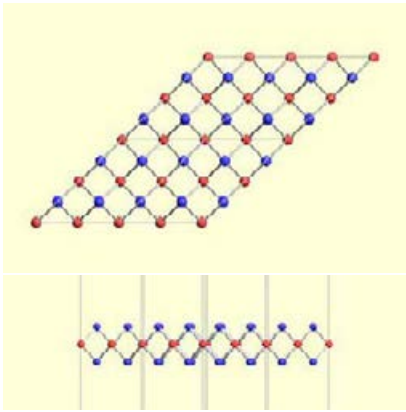

CrMg<sub>2</sub> (T)

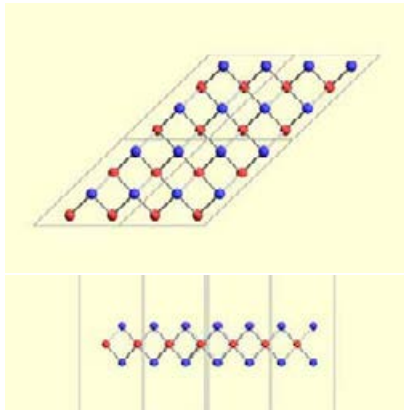

CrMg<sub>2</sub> (H)

×

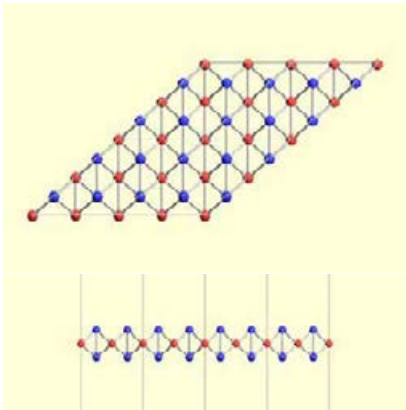

CrAl<sub>2</sub> (T)

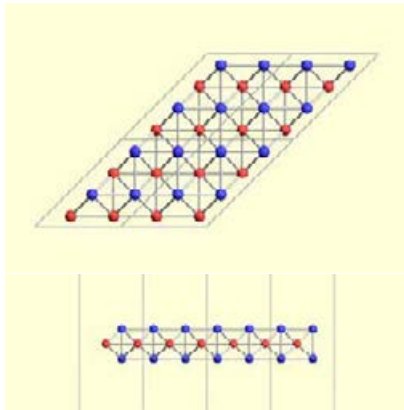

CrAl<sub>2</sub> (H)

×

×

×

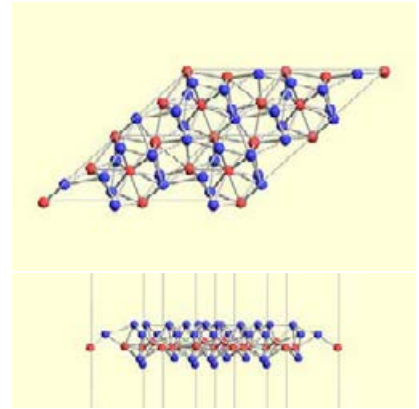

CrP<sub>2</sub> (P)

×

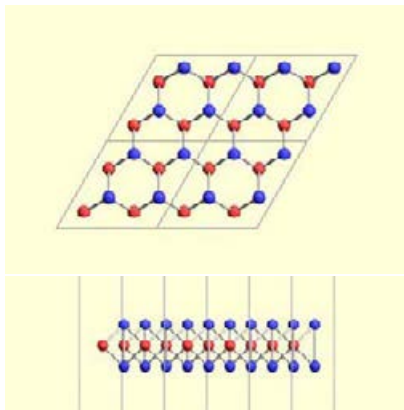

CrS<sub>2</sub> (H)

×

×

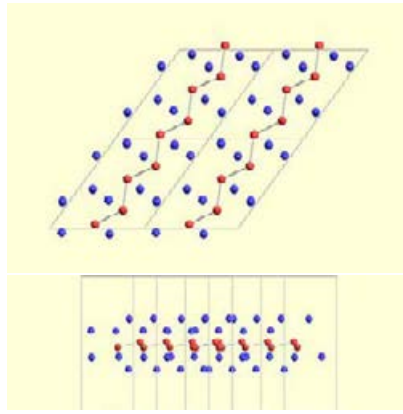

CrK<sub>2</sub> (H)

×

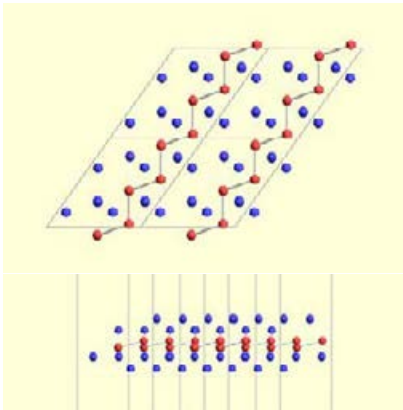

CrCa<sub>2</sub> (T)

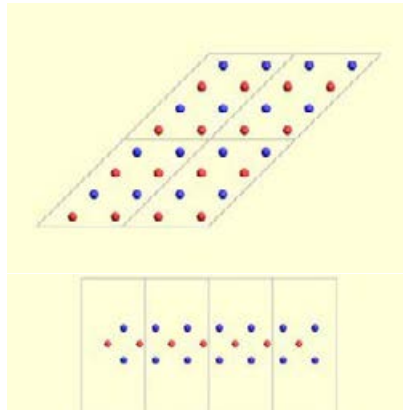

CrCa<sub>2</sub> (H)

×

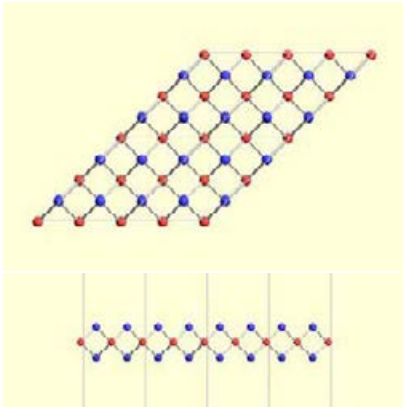

CrSc<sub>2</sub> (T)

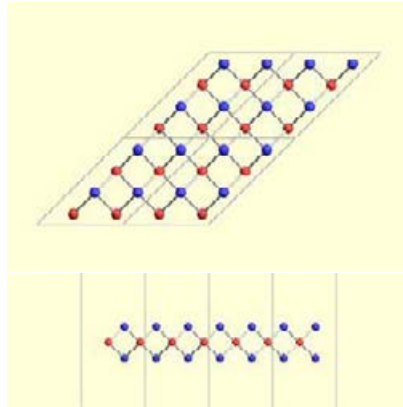

CrSc<sub>2</sub> (H)

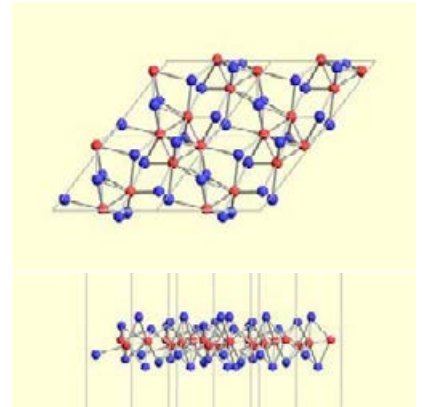

CrSc<sub>2</sub> (P)

×

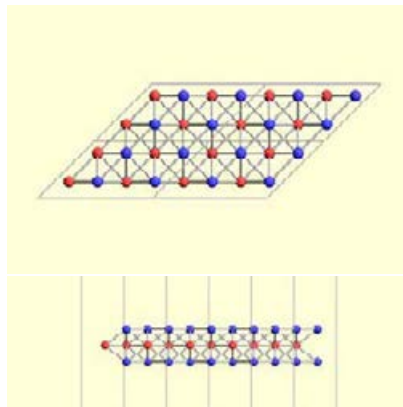

CrMn<sub>2</sub> (H)

×



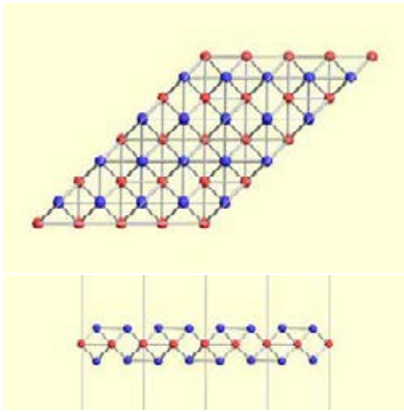

CrGa<sub>2</sub> (T)

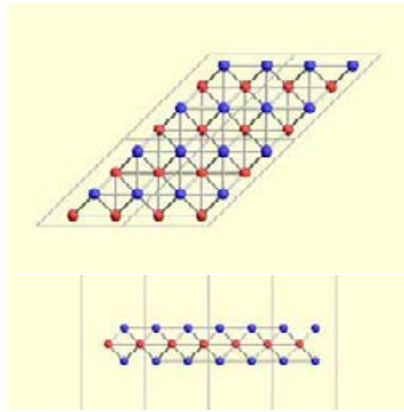

CrGa<sub>2</sub> (H)

×

×

×

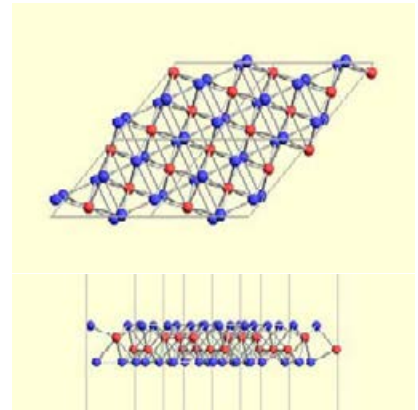

CrGe<sub>2</sub> (P)

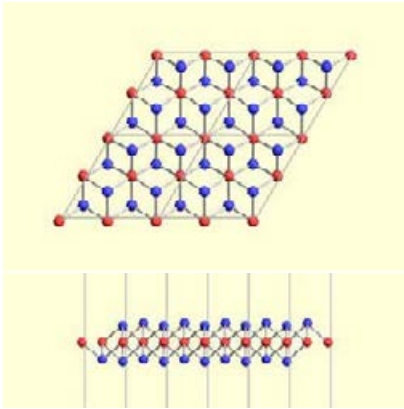

CrSe<sub>2</sub> (T)

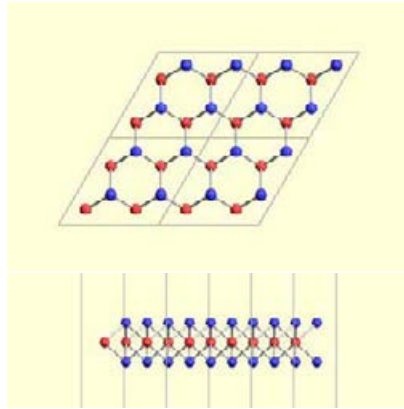

CrSe<sub>2</sub> (H)

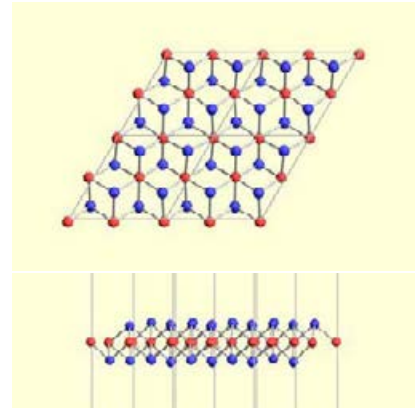

CrSe<sub>2</sub> (P)

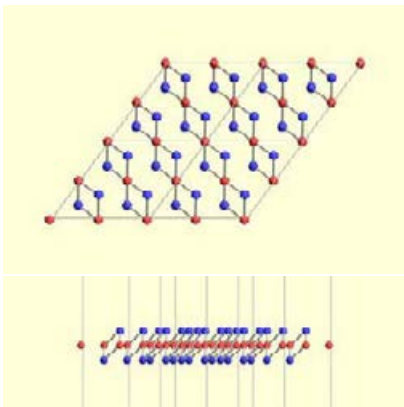

CrBr<sub>2</sub> (T)

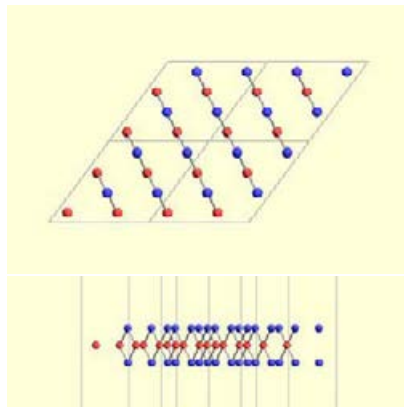

CrBr<sub>2</sub> (H)

×



×

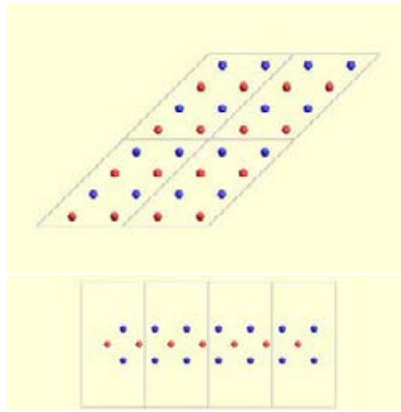

$\text{CrSr}_2$  (H)

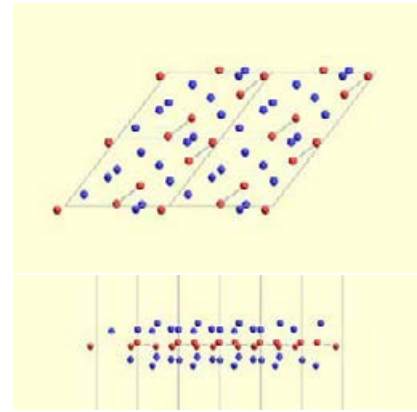

$\text{CrSr}_2$  (P)

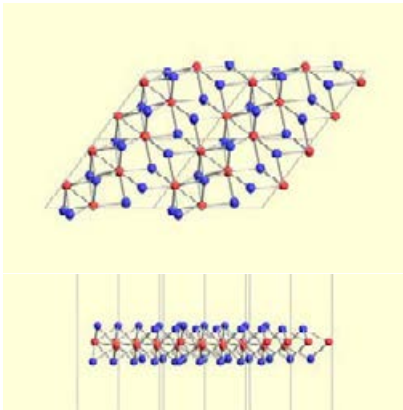

$\text{CrY}_2$  (T)

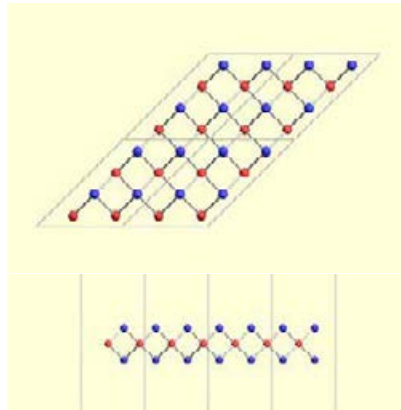

$\text{CrY}_2$  (H)

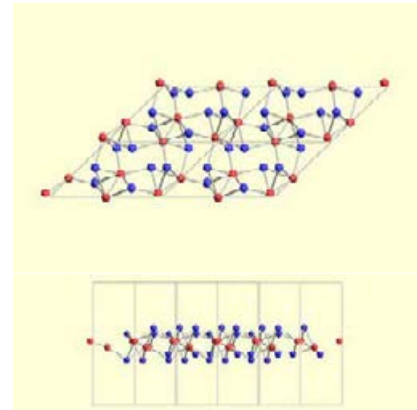

$\text{CrY}_2$  (P)

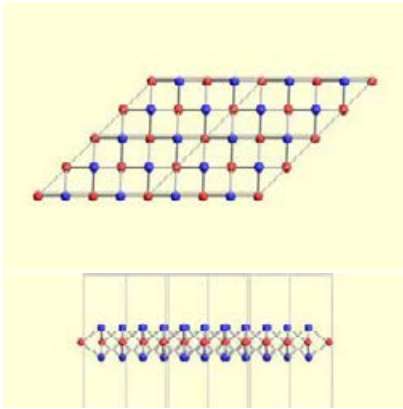

$\text{CrZr}_2$  (T)

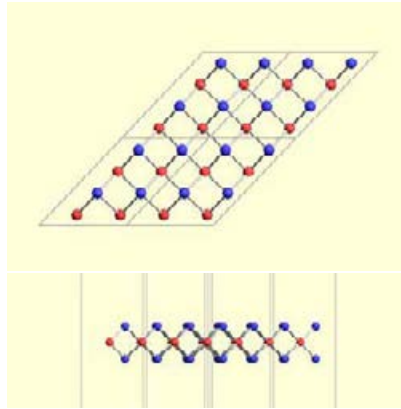

$\text{CrZr}_2$  (H)

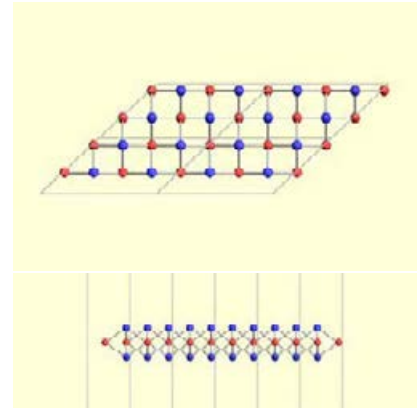

$\text{CrZr}_2$  (P)

×

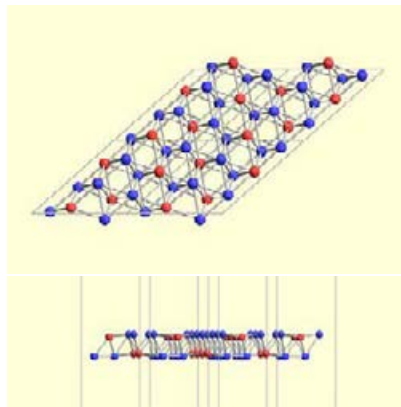

$\text{CrRu}_2$  (H)

×

×

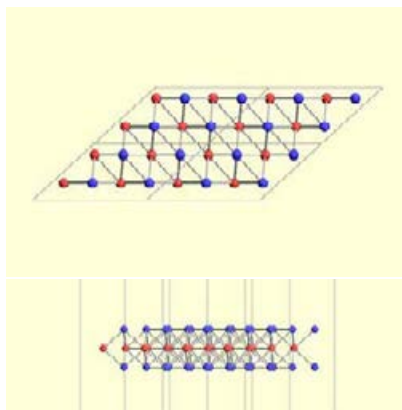

×

CrSn<sub>2</sub> (H)

×

×

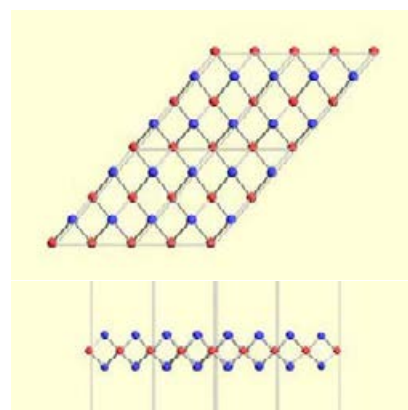

CrSb<sub>2</sub> (P)

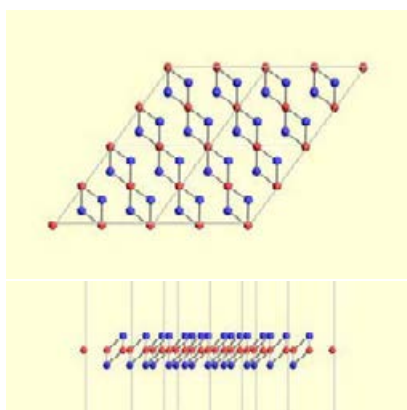

CrI<sub>2</sub> (T)

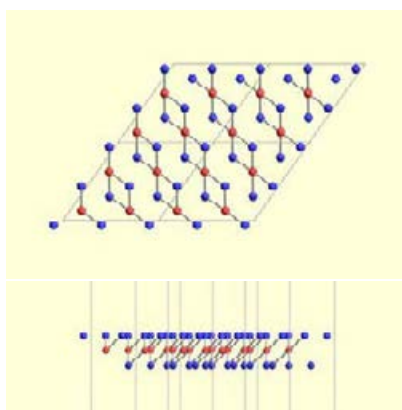

CrI<sub>2</sub> (H)

×

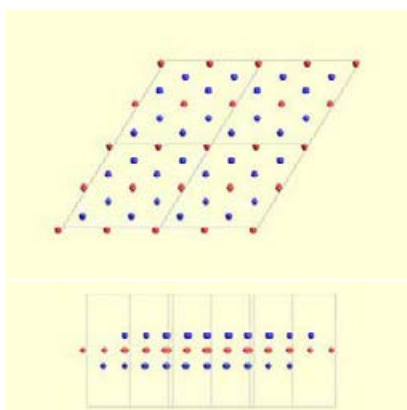

CrCs<sub>2</sub> (T)

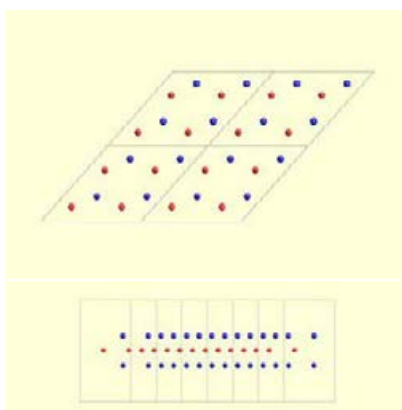

CrCs<sub>2</sub> (H)

×

×

×

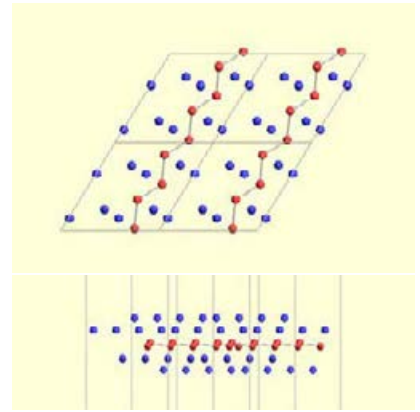

CrBa<sub>2</sub> (P)

×

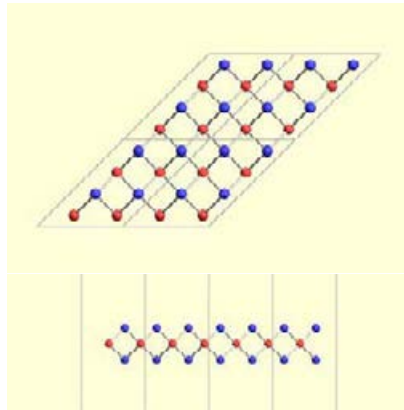

CrHf<sub>2</sub> (H)

×

×

×

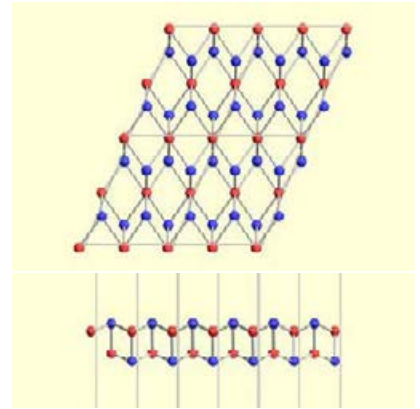

CrPb<sub>2</sub> (P)

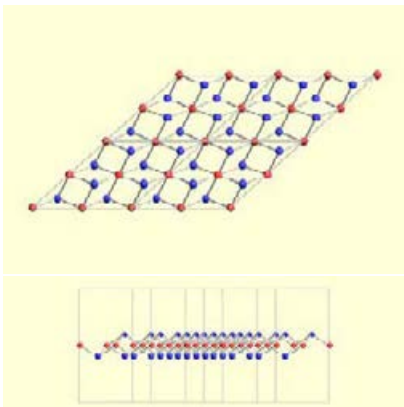

CrBi<sub>2</sub> (T)

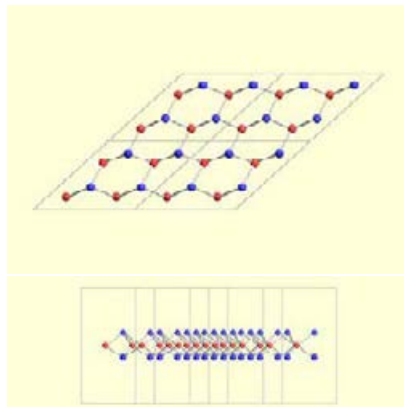

CrBi<sub>2</sub> (H)

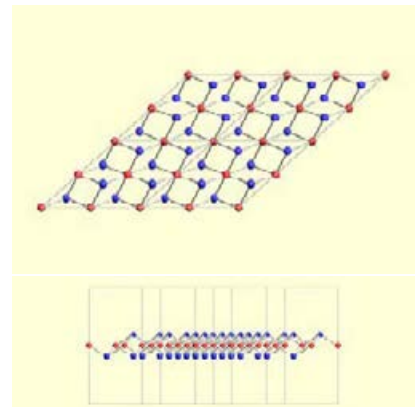

CrBi<sub>2</sub> (P)

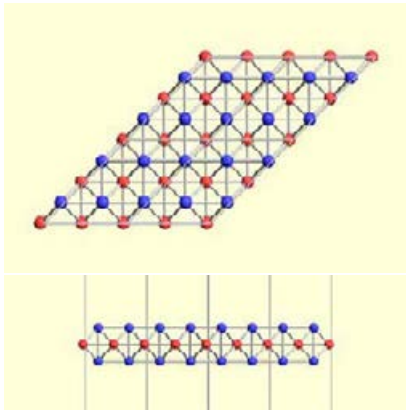

MnBe<sub>2</sub> (T)

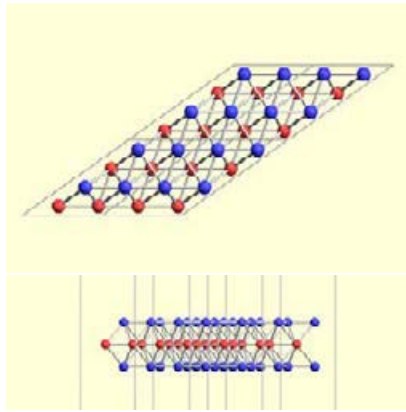

MnBe<sub>2</sub> (H)

×

×

×

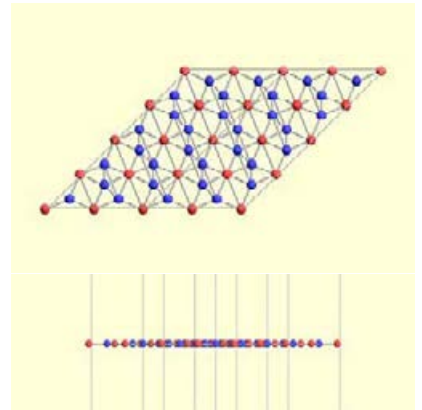

MnB<sub>2</sub> (P)

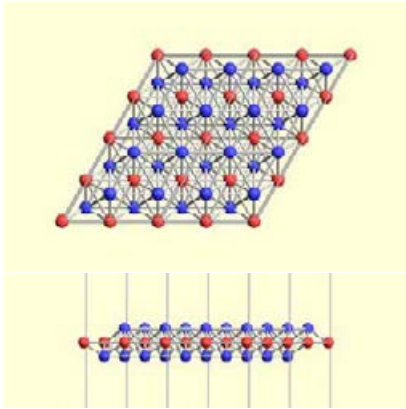

MnO<sub>2</sub> (T)

×

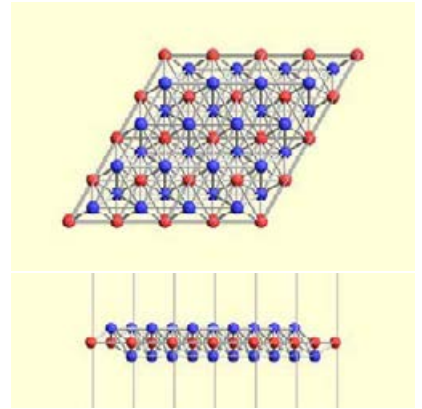

MnO<sub>2</sub> (P)

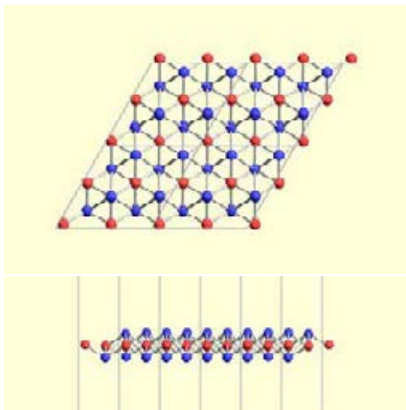

MnF<sub>2</sub> (T)

×

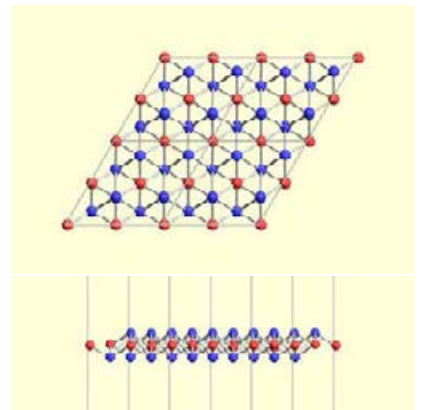

MnF<sub>2</sub> (P)

×

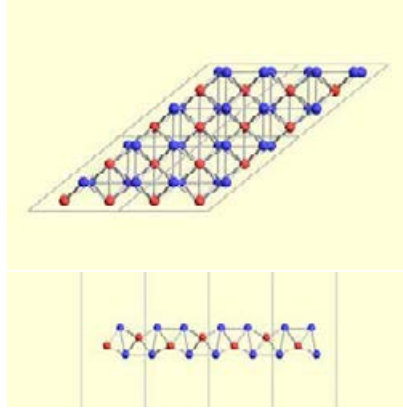

MnAl<sub>2</sub> (H)

×

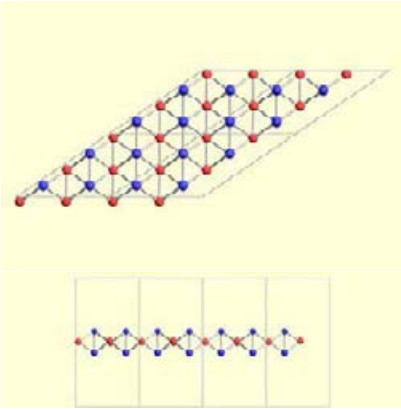

MnSi<sub>2</sub> (T)

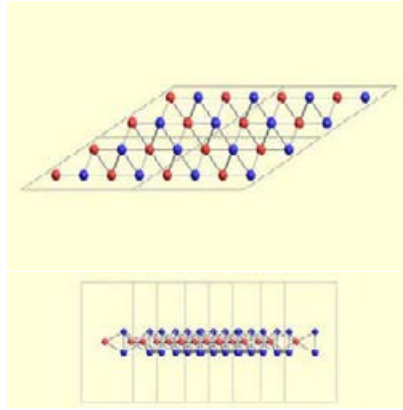

MnSi<sub>2</sub> (H)

×

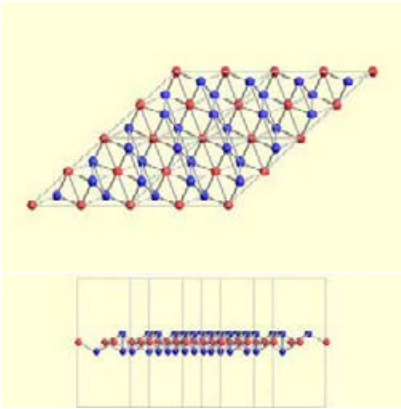

MnP<sub>2</sub> (T)

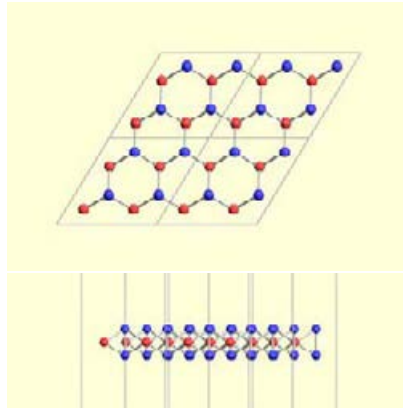

MnP<sub>2</sub> (H)

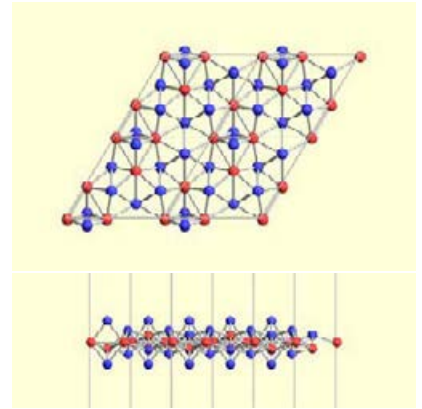

MnP<sub>2</sub> (P)

×

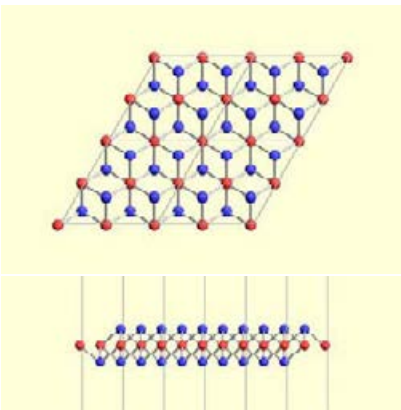

MnS<sub>2</sub> (T)

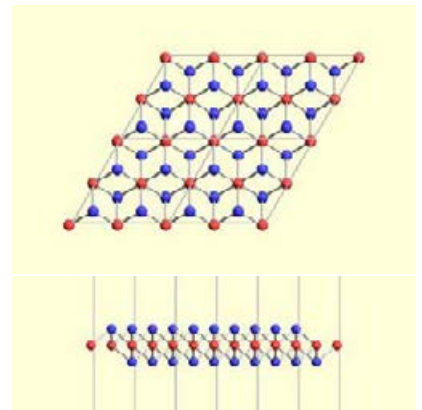

MnS<sub>2</sub> (P)



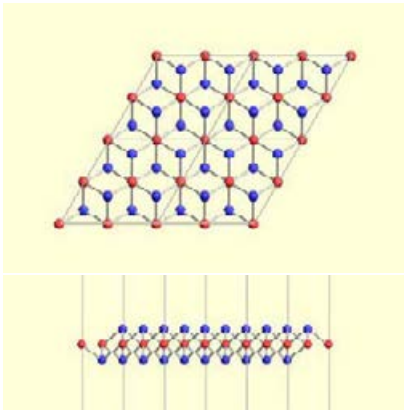

MnCl<sub>2</sub> (T)

×

×

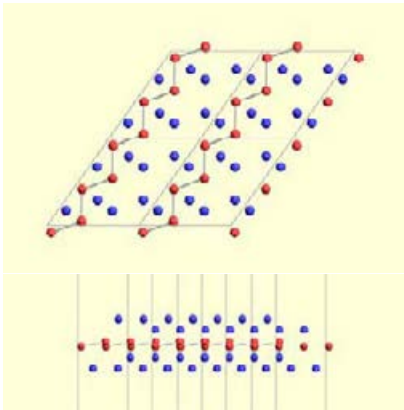

MnCa<sub>2</sub> (T)

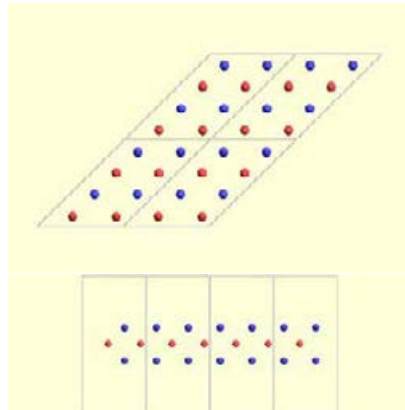

MnCa<sub>2</sub> (H)

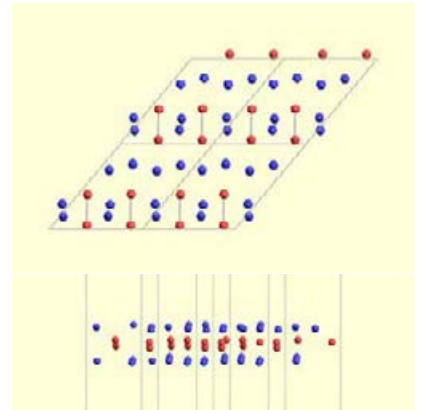

MnCa<sub>2</sub> (P)

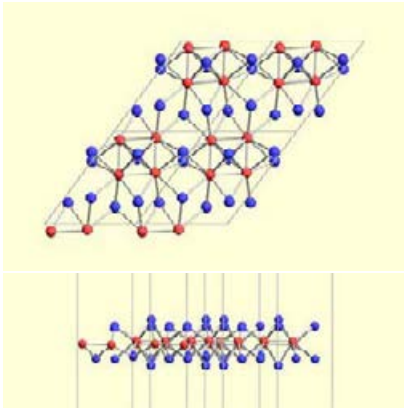

MnSc<sub>2</sub> (T)

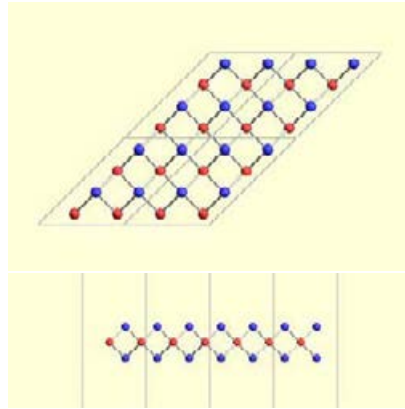

MnSc<sub>2</sub> (H)

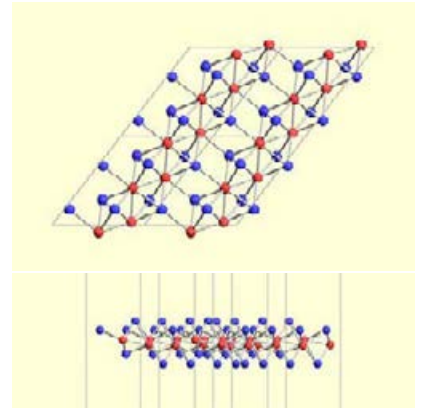

MnSc<sub>2</sub> (P)

×

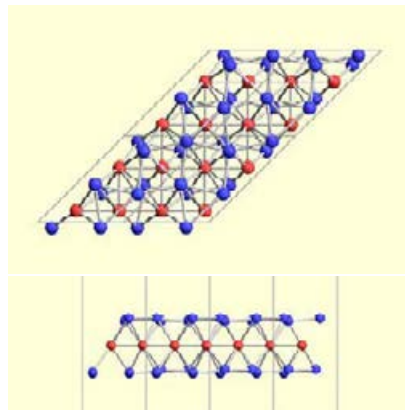

MnCr<sub>2</sub> (H)

×

×

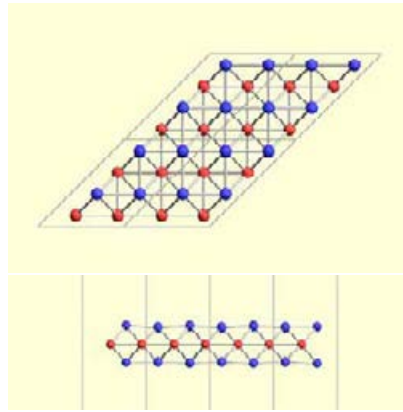

×

MnMn<sub>2</sub> (H)

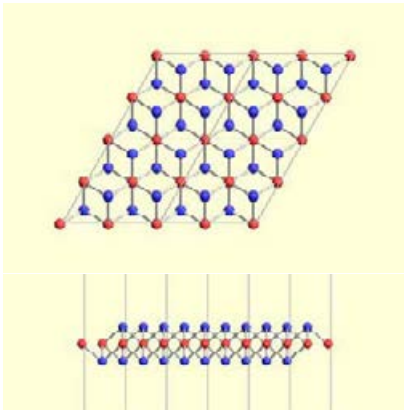

MnSe<sub>2</sub> (T)

×

×

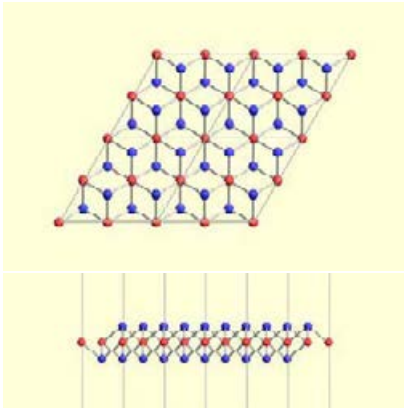

MnBr<sub>2</sub> (T)

×

×

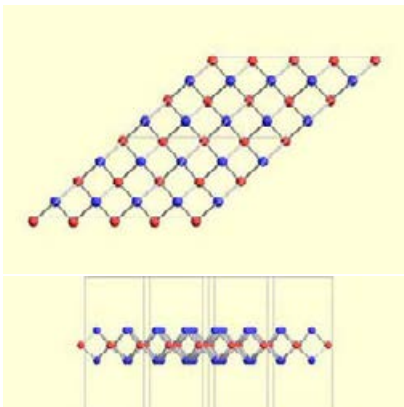

MnZr<sub>2</sub> (T)

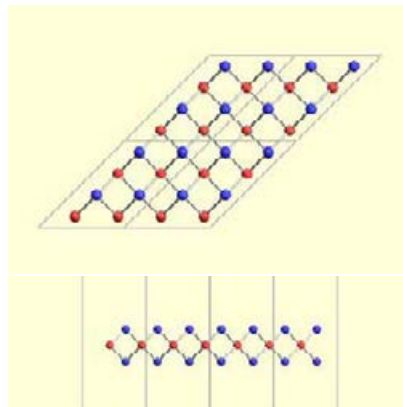

MnZr<sub>2</sub> (H)

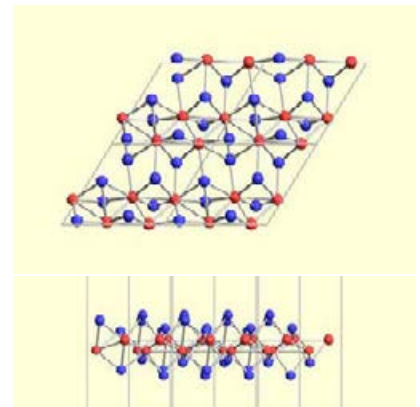

MnZr<sub>2</sub> (P)

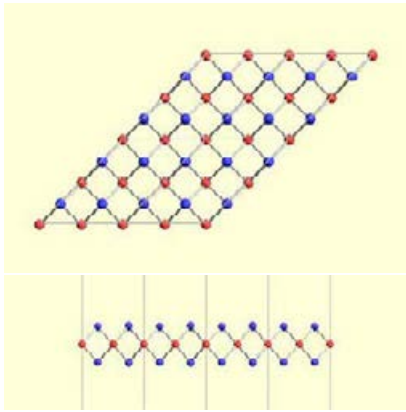

MnIn<sub>2</sub> (T)

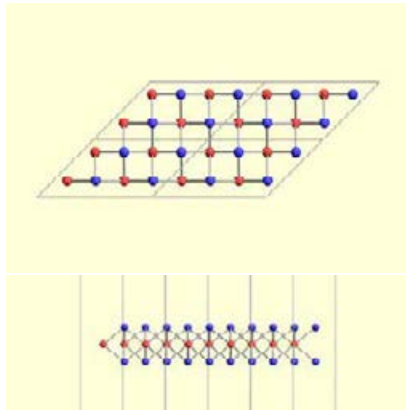

MnIn<sub>2</sub> (H)

×

×

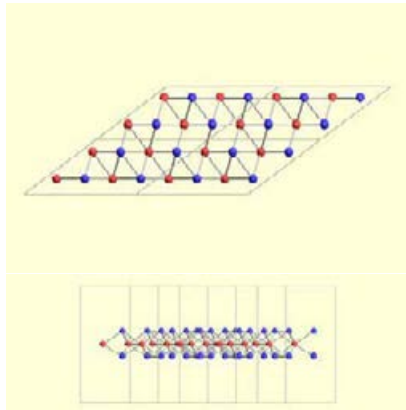

MnSn<sub>2</sub> (H)

×

×

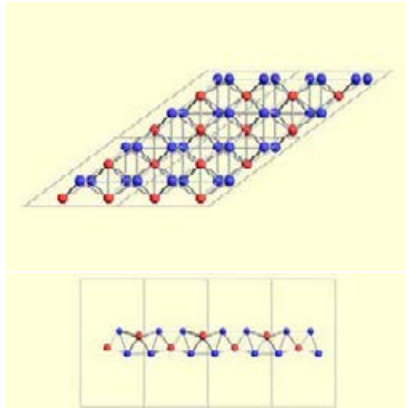

MnOs<sub>2</sub> (H)

×

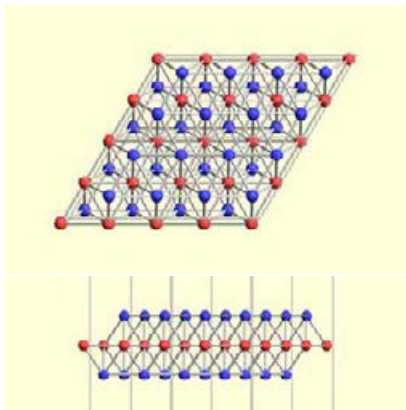

MnAu<sub>2</sub> (T)

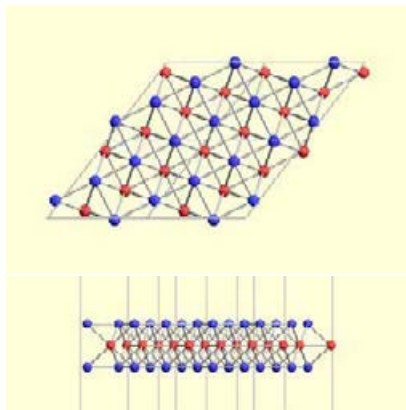

MnAu<sub>2</sub> (H)

×

×

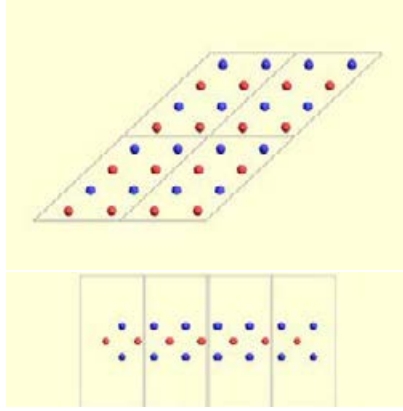

MnPb<sub>2</sub> (H)

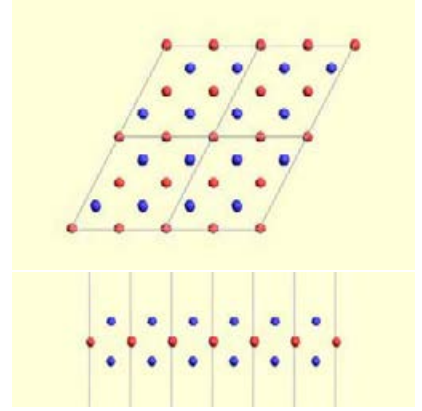

MnPb<sub>2</sub> (P)

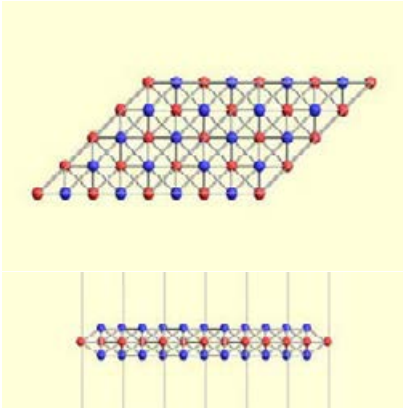

FeBe<sub>2</sub> (T)

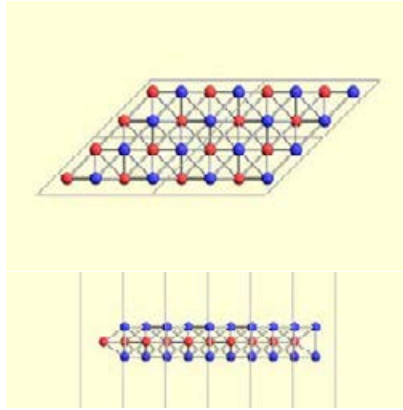

FeBe<sub>2</sub> (H)

×

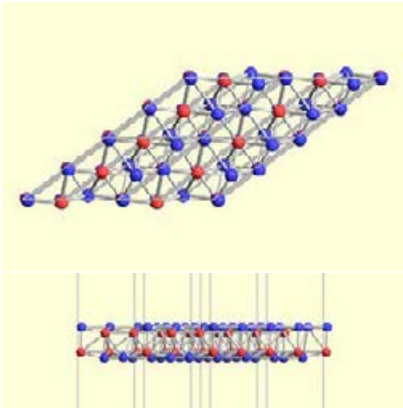

FeB<sub>2</sub> (T)

×

×

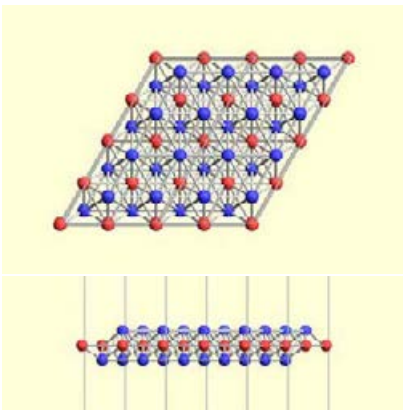

FeO<sub>2</sub> (T)

×

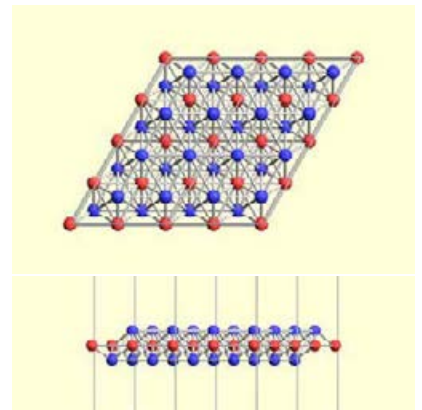

FeO<sub>2</sub> (P)



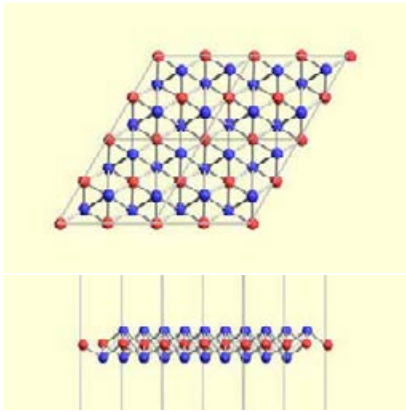

FeF<sub>2</sub> (T)

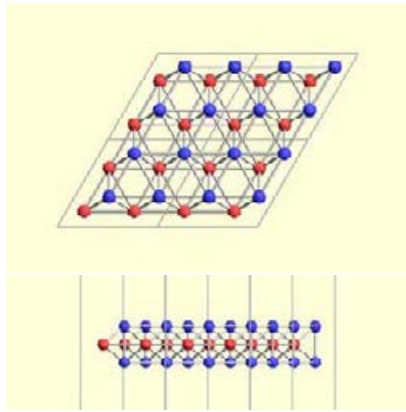

FeF<sub>2</sub> (H)

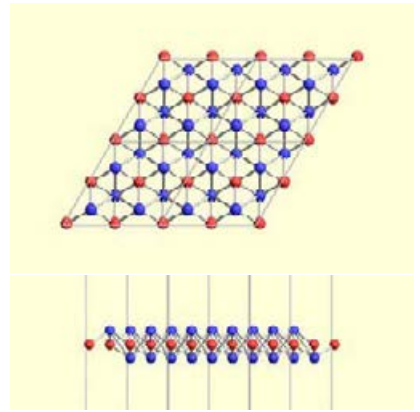

FeF<sub>2</sub> (P)

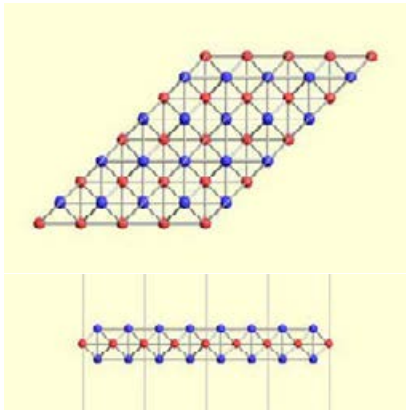

FeAl<sub>2</sub> (T)

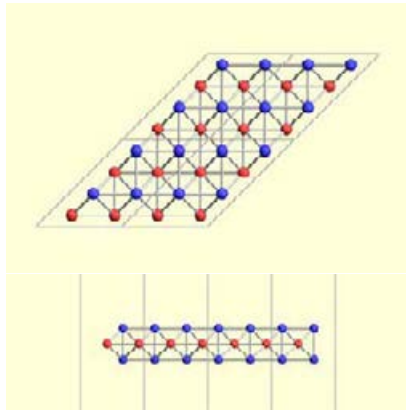

FeAl<sub>2</sub> (H)

×

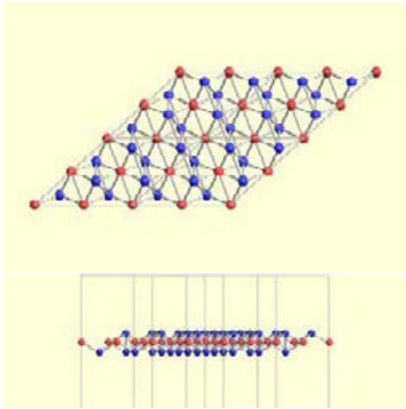

FeP<sub>2</sub> (T)

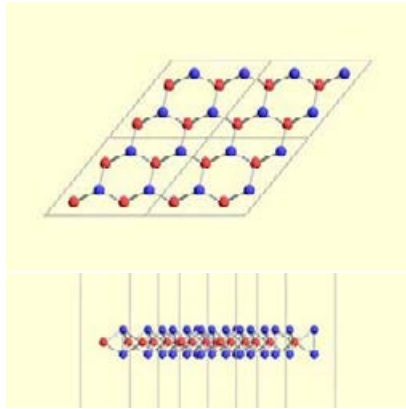

FeP<sub>2</sub> (H)

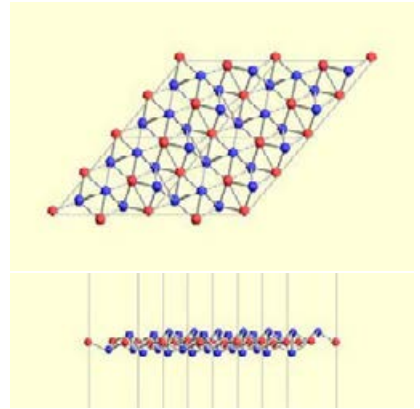

FeP<sub>2</sub> (P)

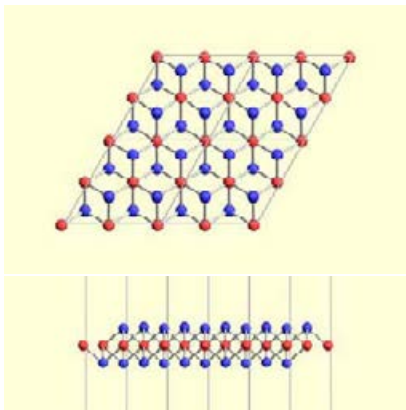

FeS<sub>2</sub> (T)

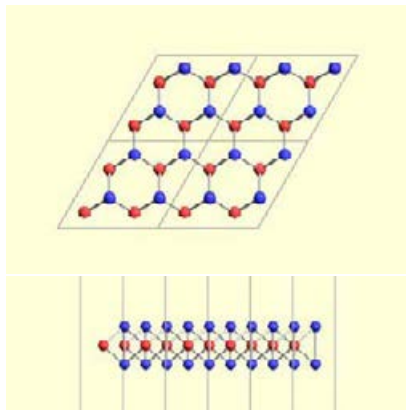

FeS<sub>2</sub> (H)

×



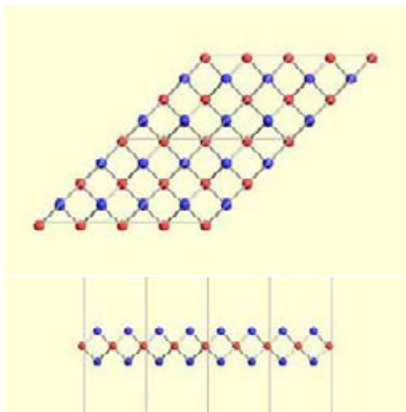

FeSc<sub>2</sub> (T)

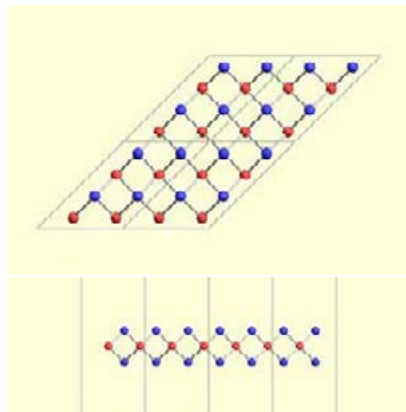

FeSc<sub>2</sub> (H)

×

×

×

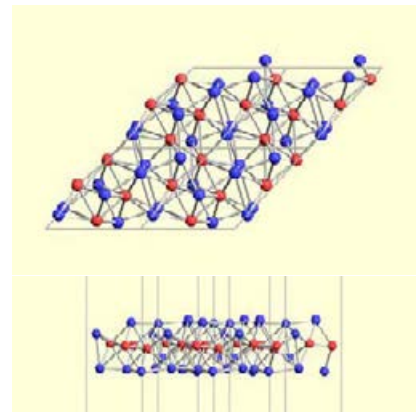

FeGe<sub>2</sub> (P)

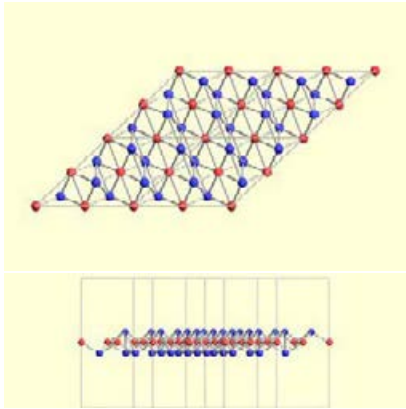

FeAs<sub>2</sub> (T)

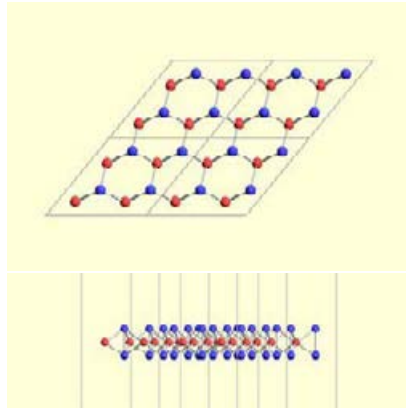

FeAs<sub>2</sub> (H)

×

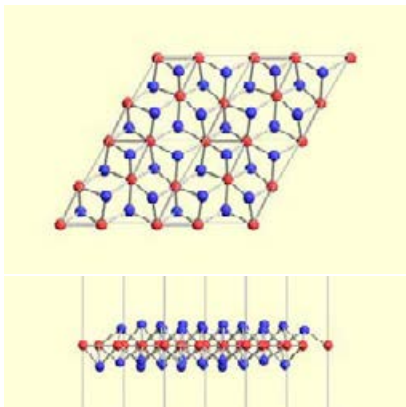

FeSe<sub>2</sub> (T)

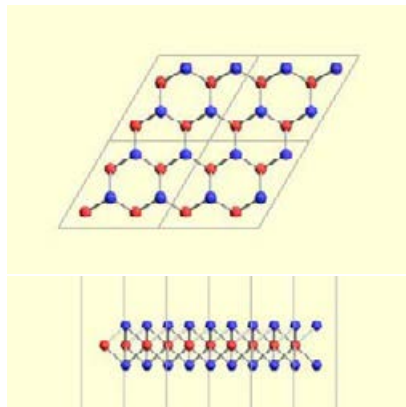

FeSe<sub>2</sub> (H)

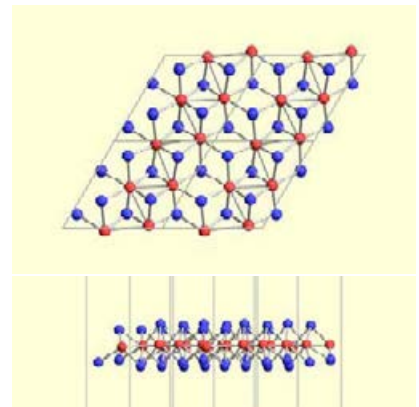

FeSe<sub>2</sub> (P)

×

×

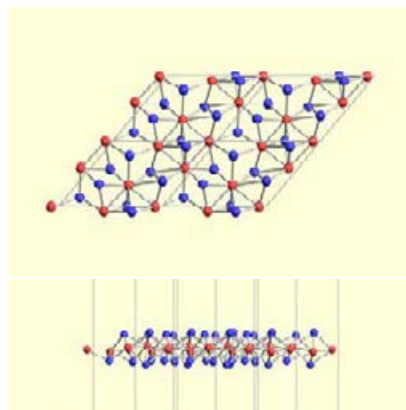

FeZr<sub>2</sub> (P)

×

×

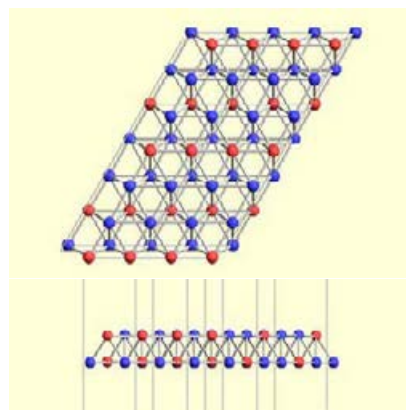

FeTe<sub>2</sub> (P)

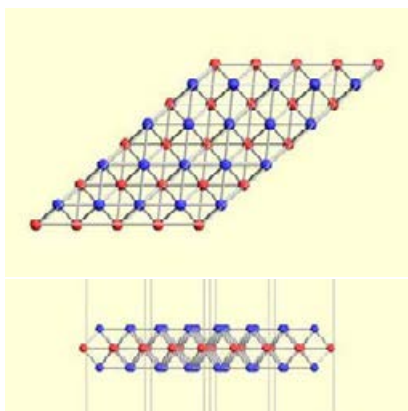

FePd<sub>2</sub> (T)

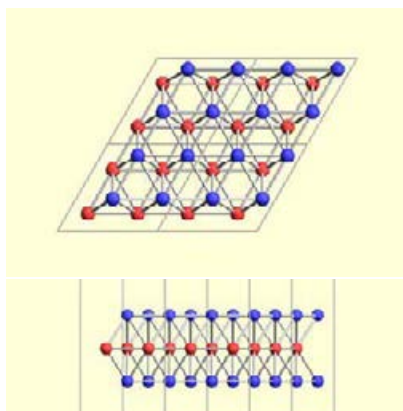

FePd<sub>2</sub> (H)

×

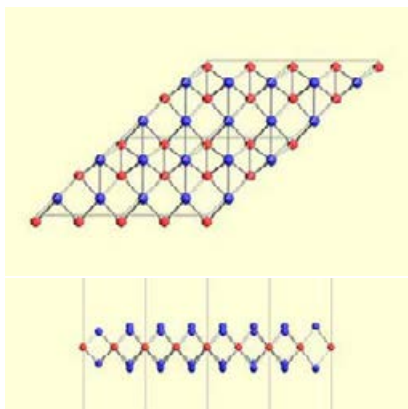

FeSn<sub>2</sub> (T)

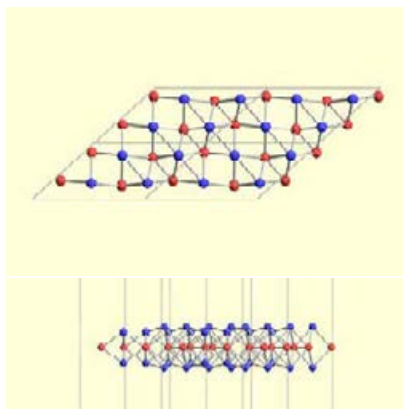

FeSn<sub>2</sub> (H)

×

×

×

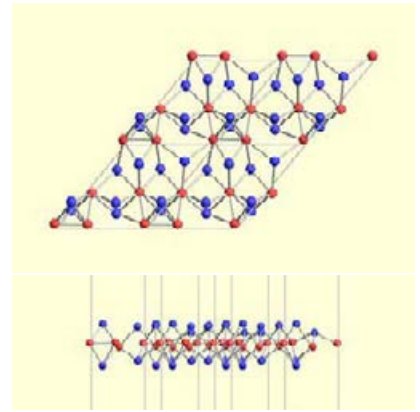

FeBi<sub>2</sub> (P)

×

×

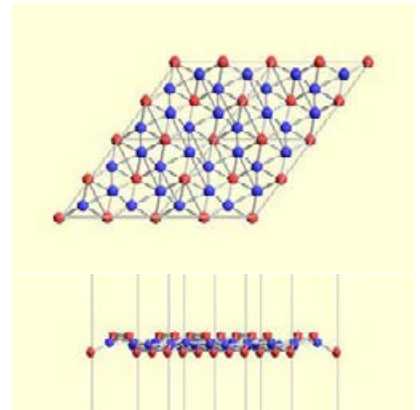

CoB<sub>2</sub> (P)

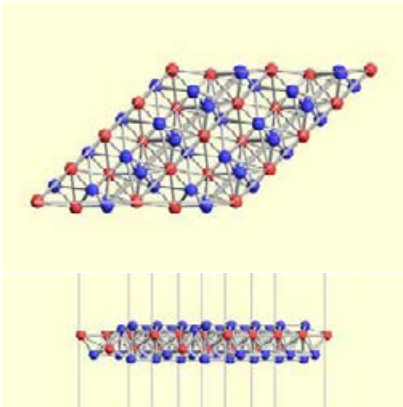

CoC<sub>2</sub> (T)

×

×

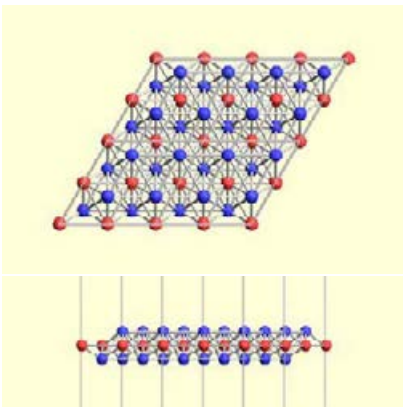

CoO<sub>2</sub> (T)

×

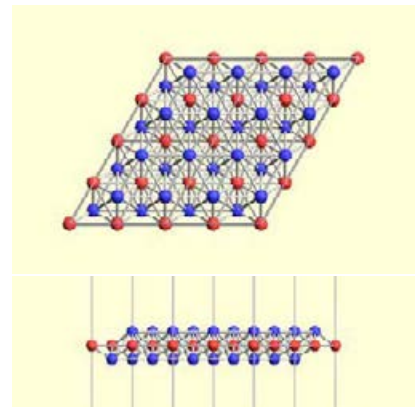

CoO<sub>2</sub> (P)

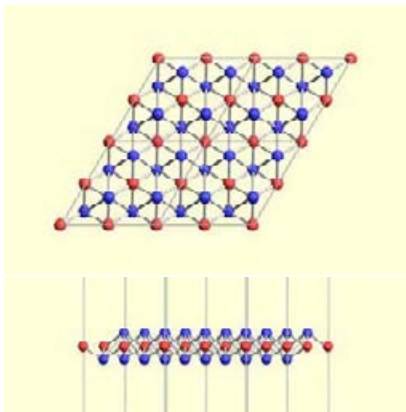

CoF<sub>2</sub> (T)

×

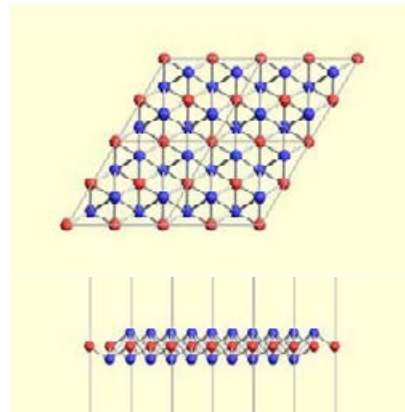

CoF<sub>2</sub> (P)

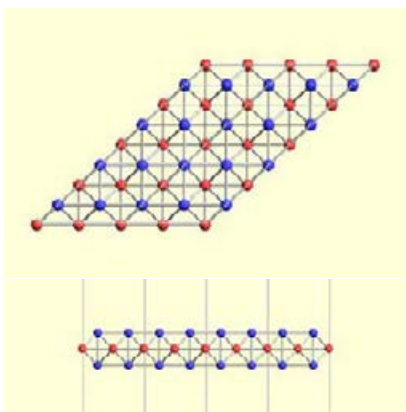

CoAl<sub>2</sub> (T)

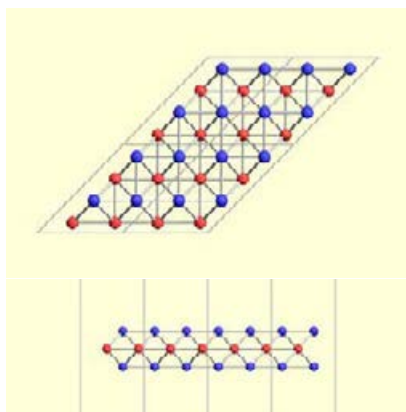

CoAl<sub>2</sub> (H)

×

×

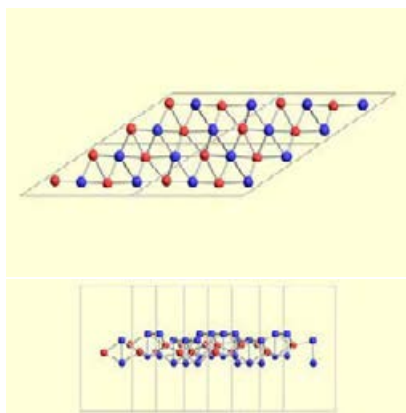

CoSi<sub>2</sub> (H)

×

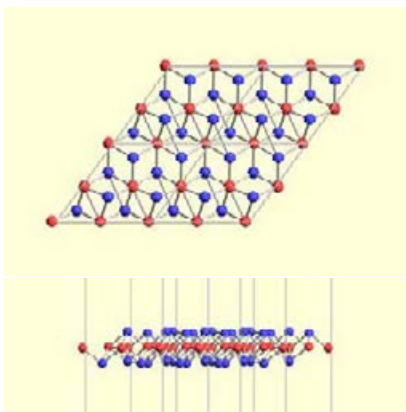

CoS<sub>2</sub> (T)

×

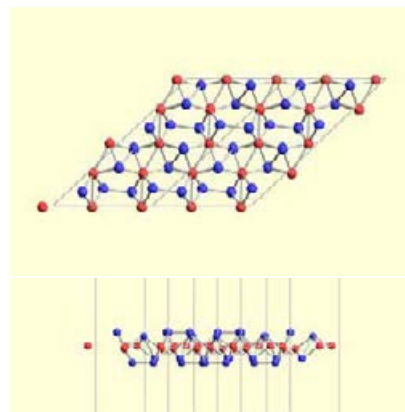

CoS<sub>2</sub> (P)

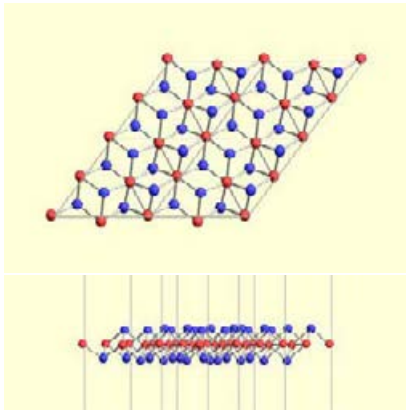

CoSe<sub>2</sub> (T)

×

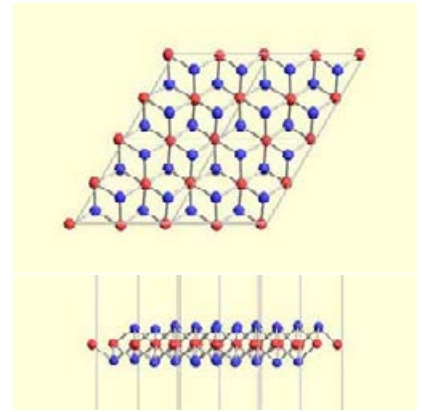

CoSe<sub>2</sub> (P)

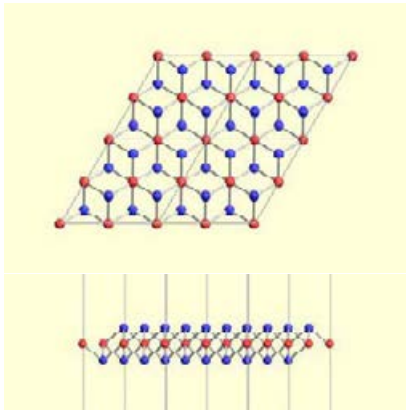

CoBr<sub>2</sub> (T)

×

×

×

×

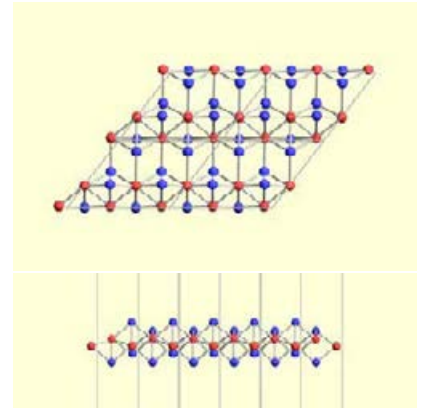

CoZr<sub>2</sub> (P)

×

×

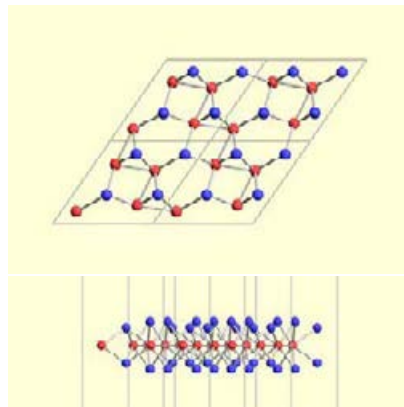

CoSb<sub>2</sub> (H)



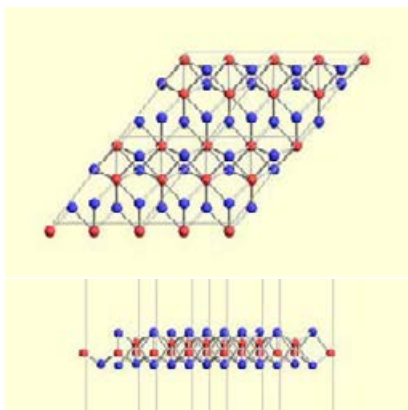

CoHf<sub>2</sub> (T)

×

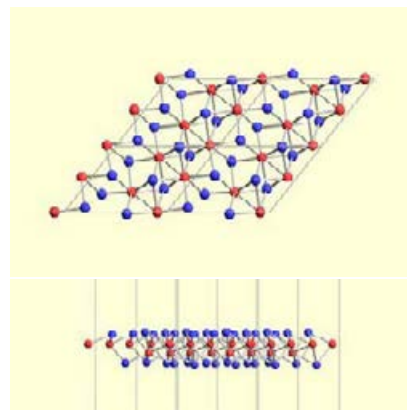

CoHf<sub>2</sub> (P)

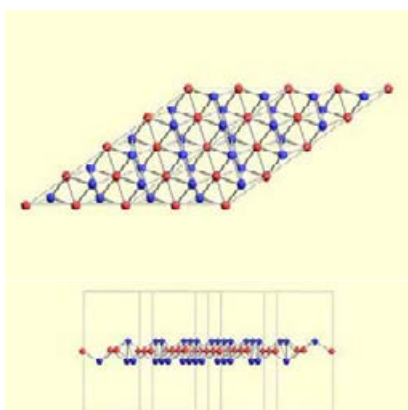

CoIr<sub>2</sub> (T)

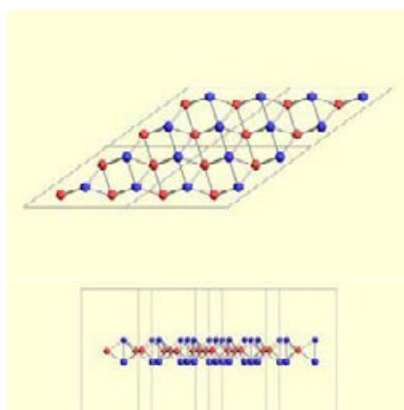

CoIr<sub>2</sub> (H)

×

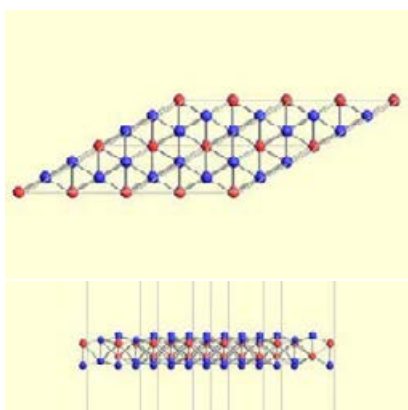

NiBe<sub>2</sub> (T)

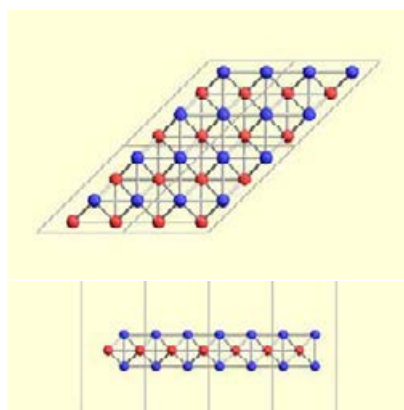

NiBe<sub>2</sub> (H)

×

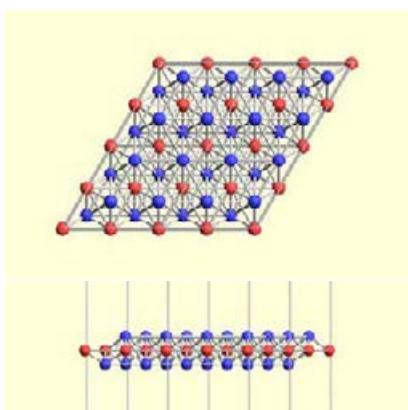

NiO<sub>2</sub> (T)

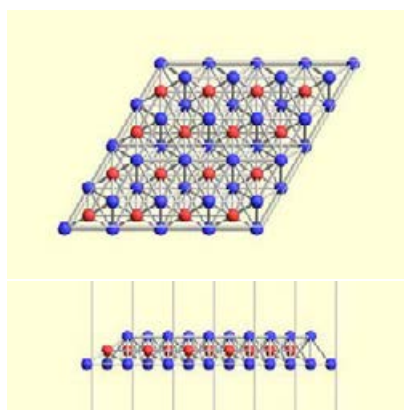

NiO<sub>2</sub> (H)

×

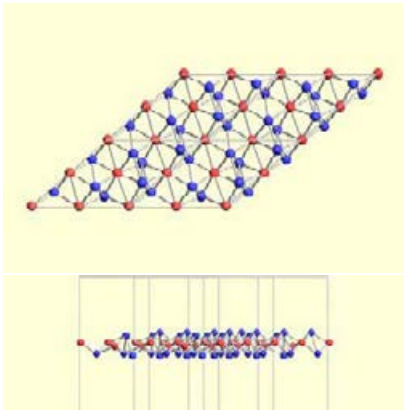

NiP<sub>2</sub> (T)

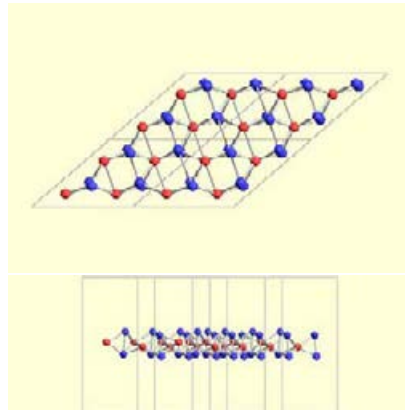

NiP<sub>2</sub> (H)

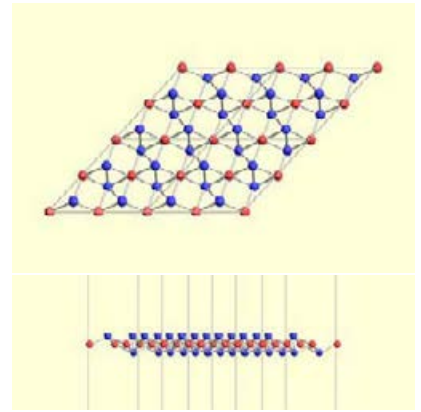

NiP<sub>2</sub> (P)

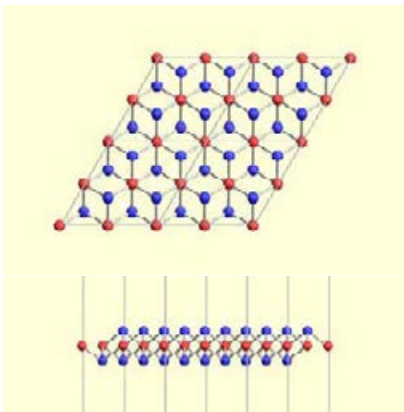

NiS<sub>2</sub> (T)

×

×

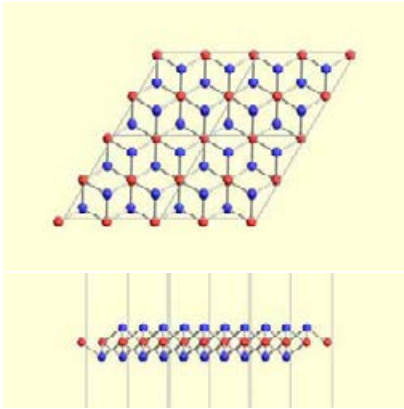

NiSc<sub>2</sub> (T)

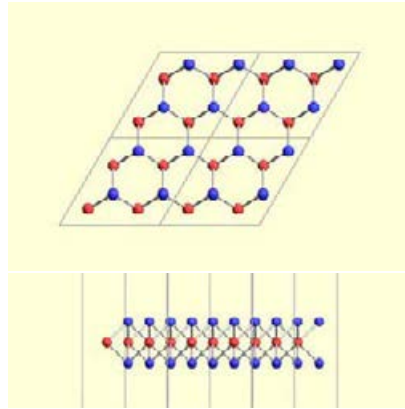

NiSc<sub>2</sub> (H)

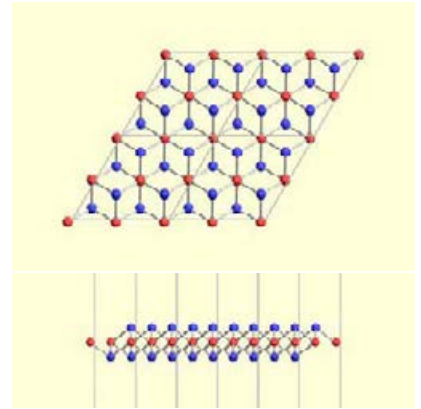

NiSc<sub>2</sub> (P)

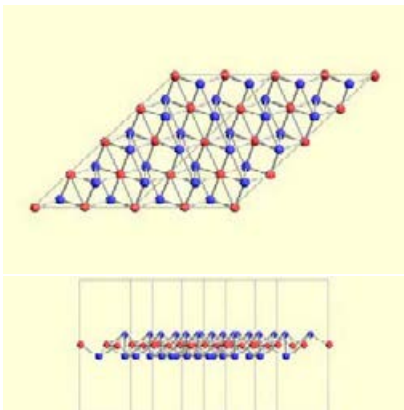

NiAs<sub>2</sub> (T)

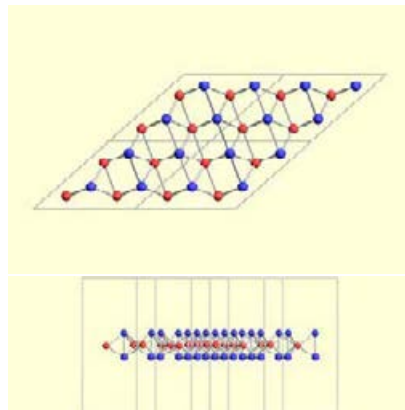

NiAs<sub>2</sub> (H)

×

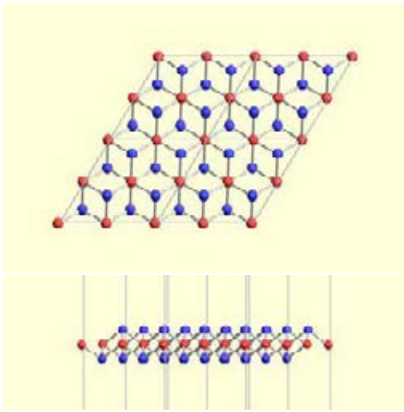

NiSe<sub>2</sub> (T)

×

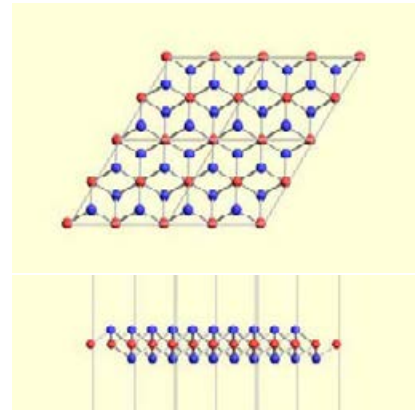

NiSe<sub>2</sub> (P)

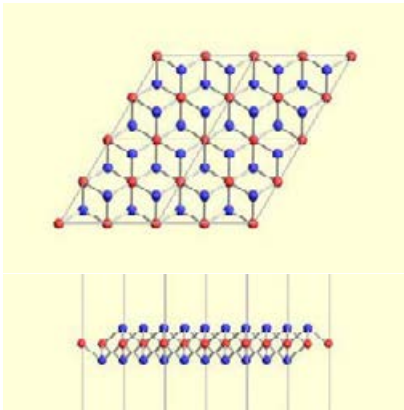

NiBr<sub>2</sub> (T)

×

×

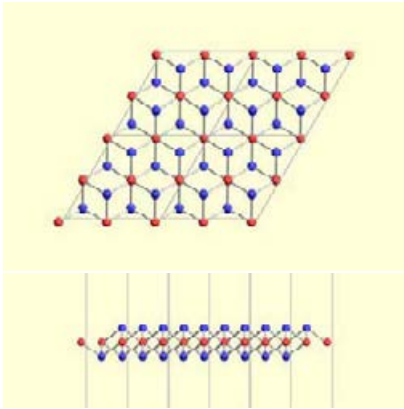

NiY<sub>2</sub> (T)

×

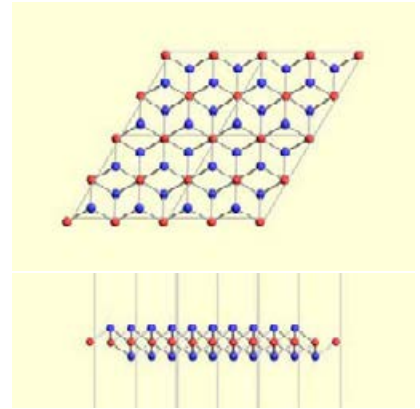

NiY<sub>2</sub> (P)

×

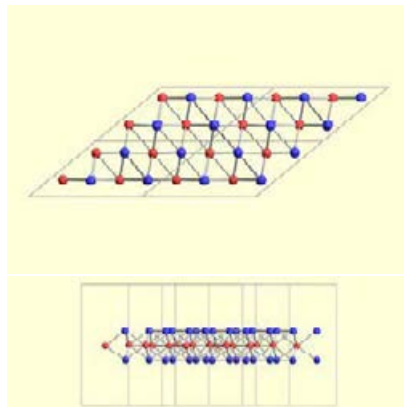

NiIn<sub>2</sub> (H)

×

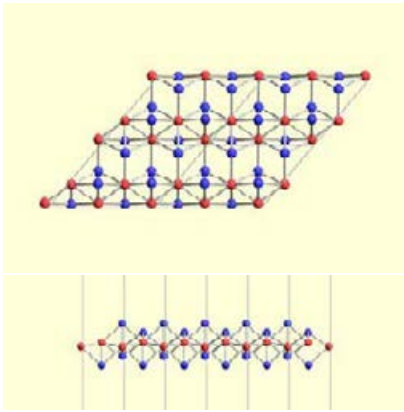

NiSn<sub>2</sub> (T)

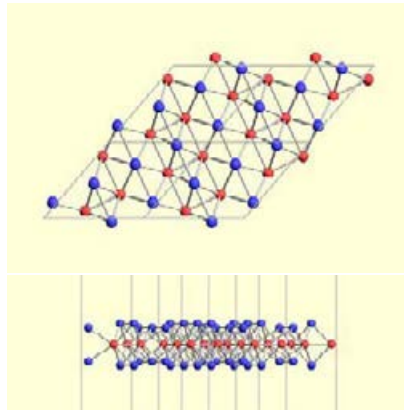

NiSn<sub>2</sub> (H)

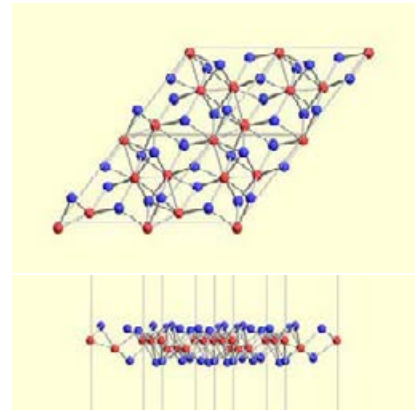

NiSn<sub>2</sub> (P)

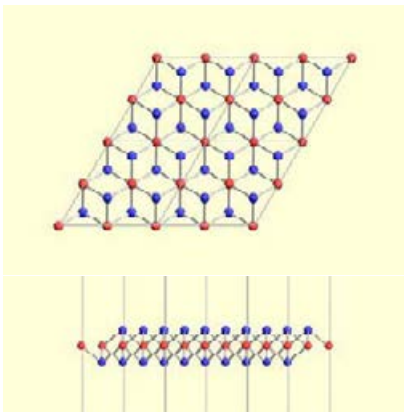

NiI<sub>2</sub> (T)

×

×

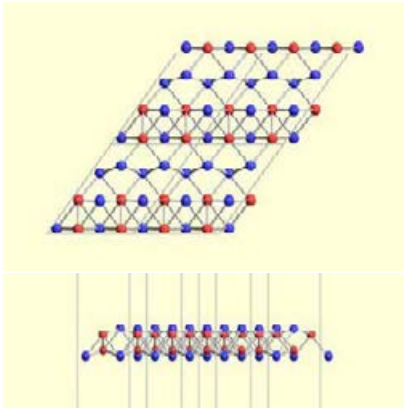

NiHf<sub>2</sub> (T)

×

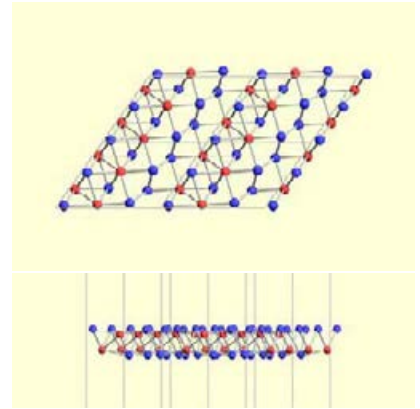

NiHf<sub>2</sub> (P)

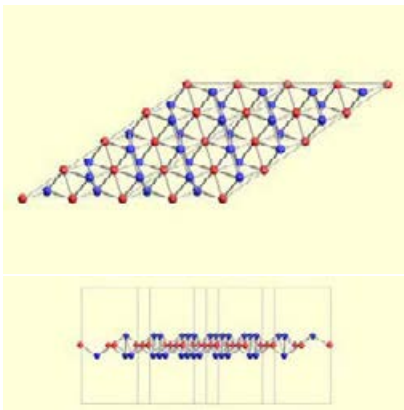

NiIr<sub>2</sub> (T)

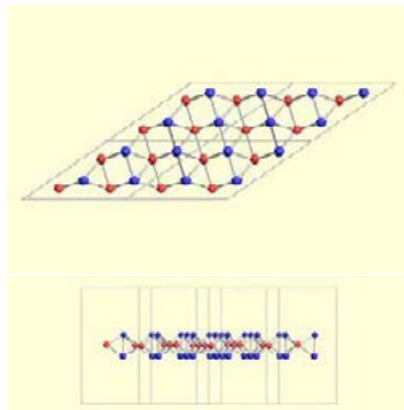

NiIr<sub>2</sub> (H)

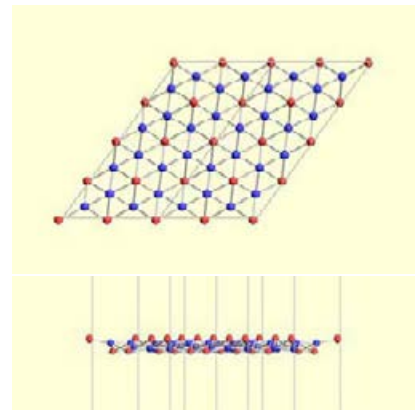

NiIr<sub>2</sub> (P)



×

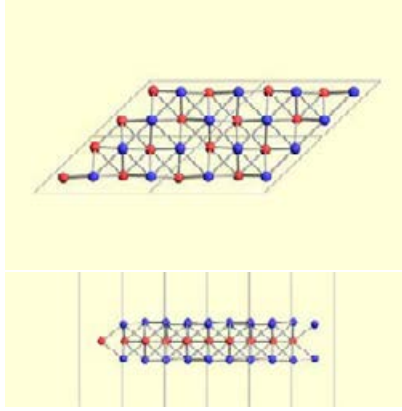

NiHg<sub>2</sub> (H)

×

×

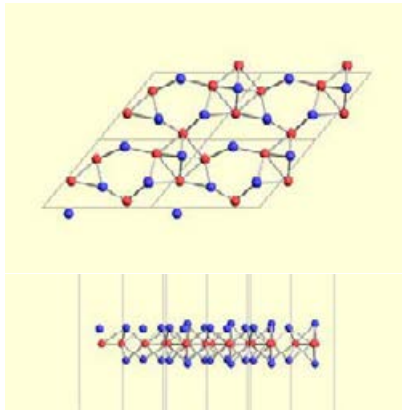

NiBi<sub>2</sub> (H)

×

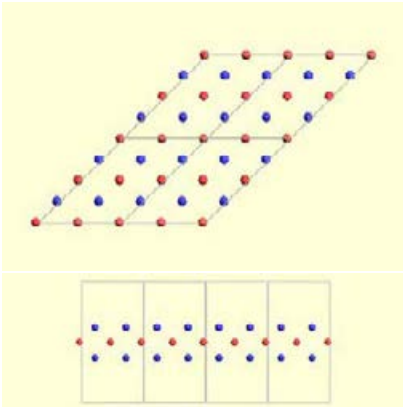

GaCa<sub>2</sub> (T)

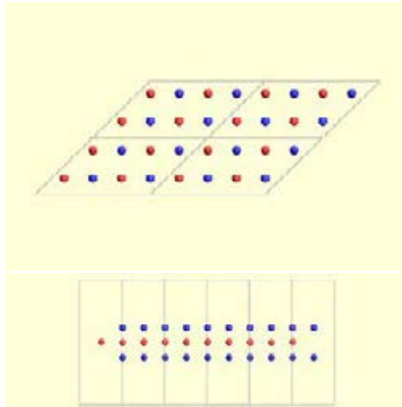

GaCa<sub>2</sub> (H)

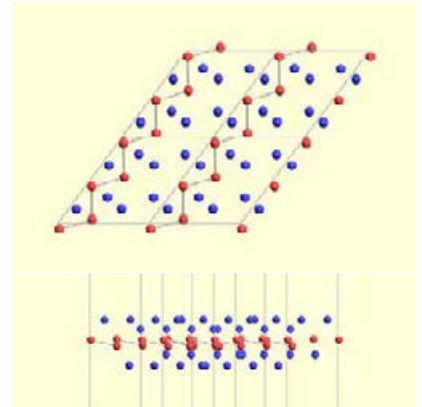

GaCa<sub>2</sub> (P)

×

×

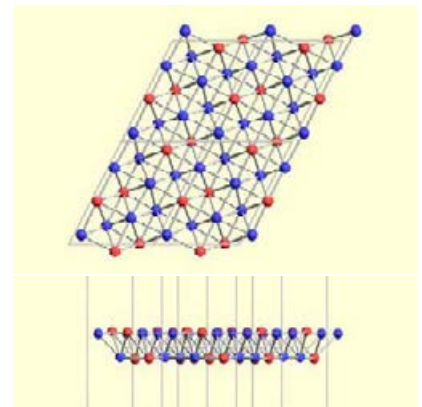

GaTi<sub>2</sub> (P)



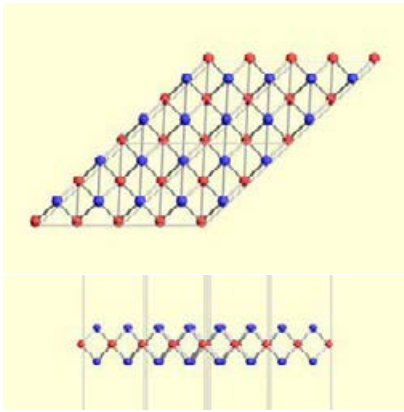

GaCr<sub>2</sub> (T)

×

×

×

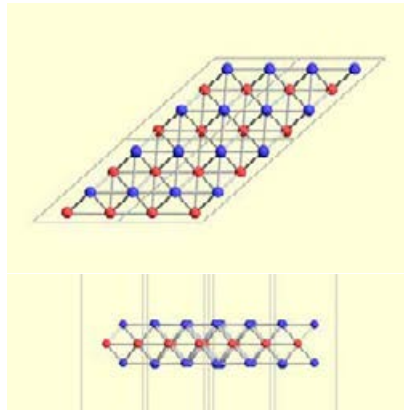

GaMn<sub>2</sub> (H)

×

×

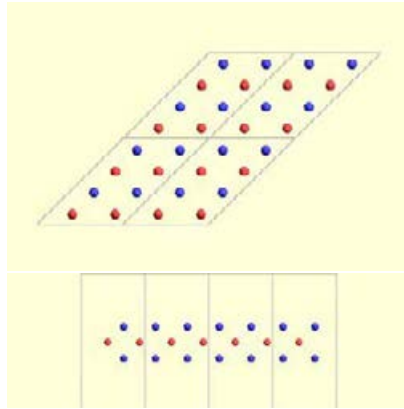

GaY<sub>2</sub> (H)

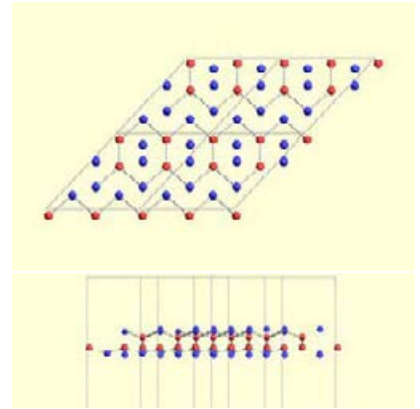

GaY<sub>2</sub> (P)

×

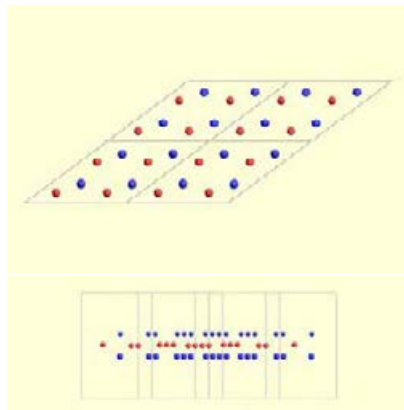

GaSn<sub>2</sub> (H)

×

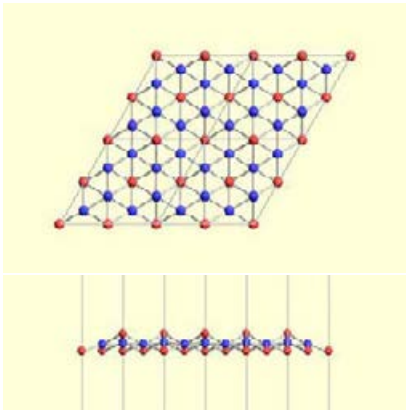

GeBe<sub>2</sub> (T)

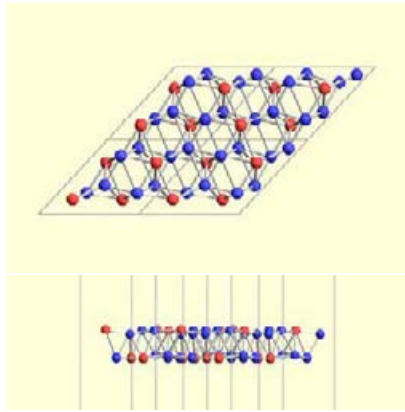

GeBe<sub>2</sub> (H)

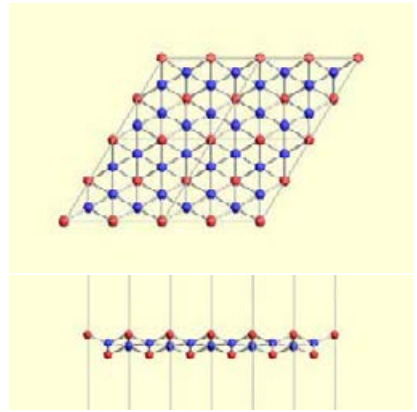

GeBe<sub>2</sub> (P)

×

×

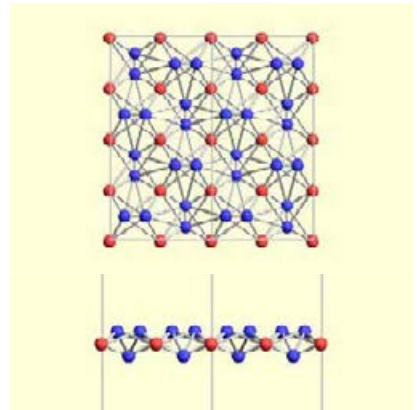

GeC<sub>2</sub> (P)

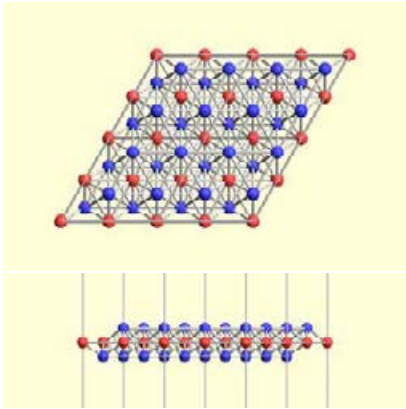

GeO<sub>2</sub> (T)

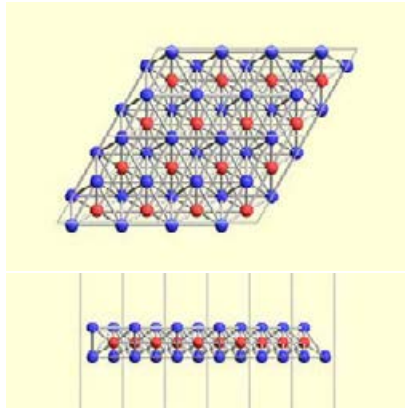

GeO<sub>2</sub> (H)

×

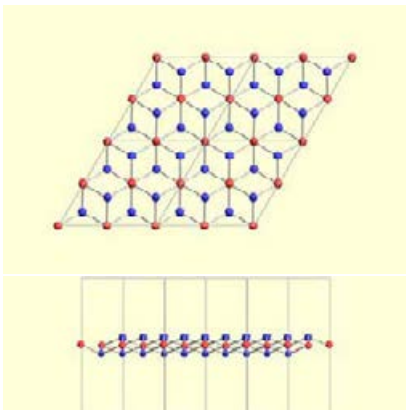

GeMg<sub>2</sub> (T)

×

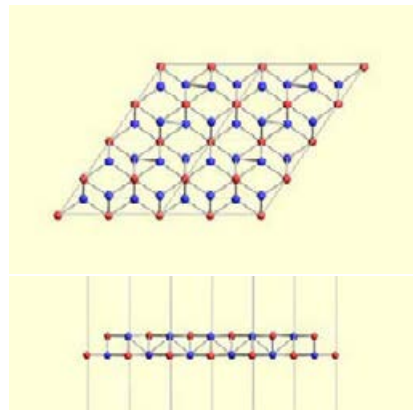

GeMg<sub>2</sub> (P)

×

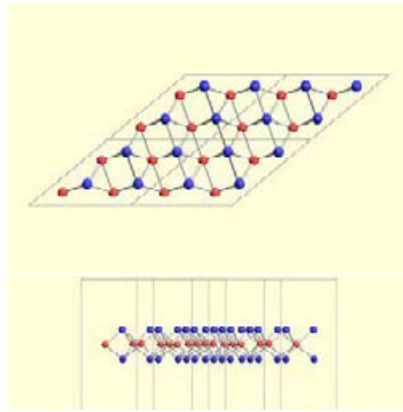

GeAl<sub>2</sub> (H)

×

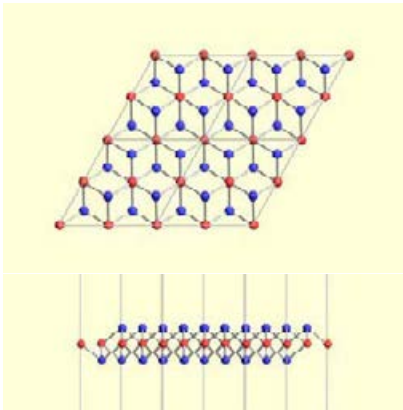

GeCl<sub>2</sub> (T)

×

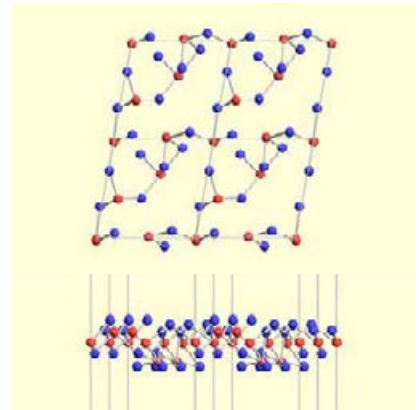

GeCl<sub>2</sub> (P)

×

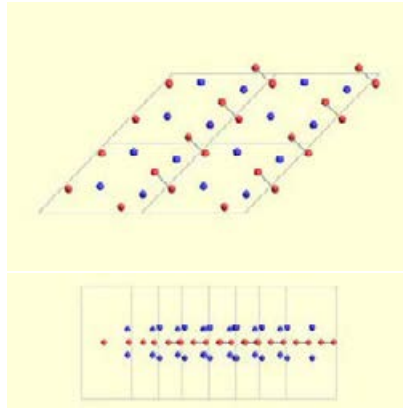

GeK<sub>2</sub> (H)

×

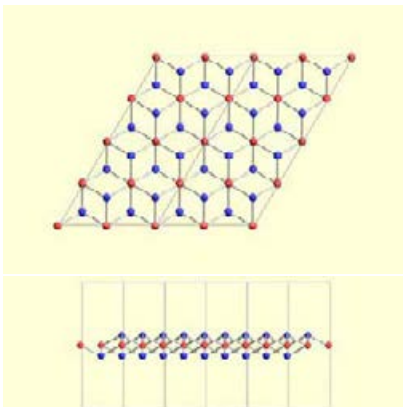

GeCa<sub>2</sub> (T)

×

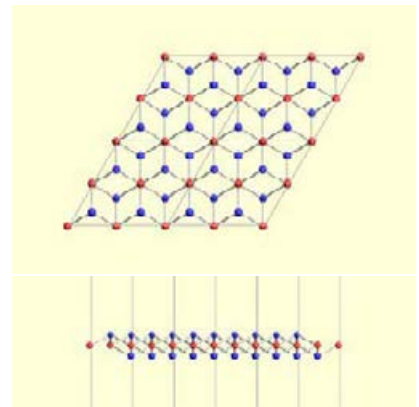

GeCa<sub>2</sub> (P)

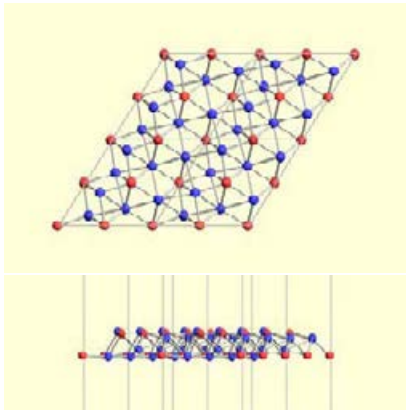

GeCr<sub>2</sub> (T)

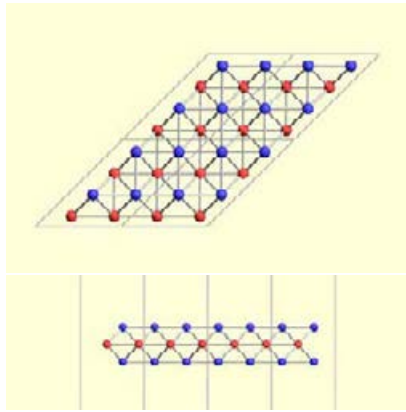

GeCr<sub>2</sub> (H)

×

×

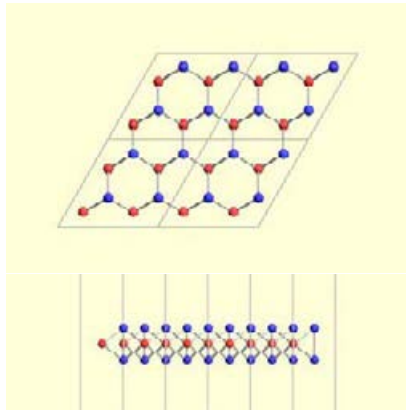

GeGe<sub>2</sub> (H)

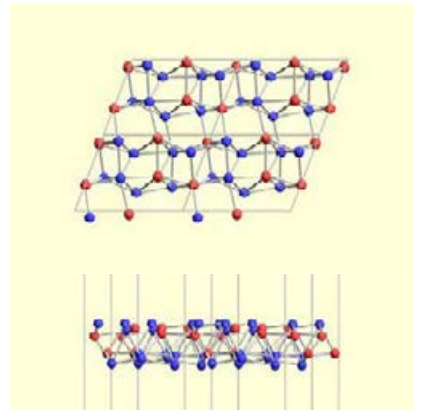

GeGe<sub>2</sub> (P)

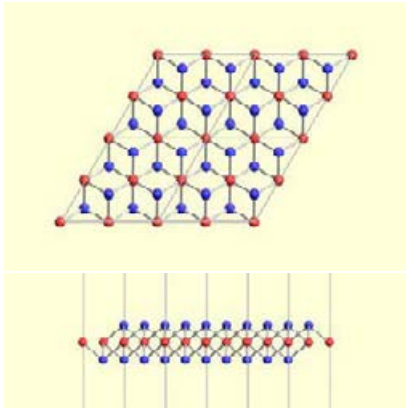

GeSe<sub>2</sub> (T)

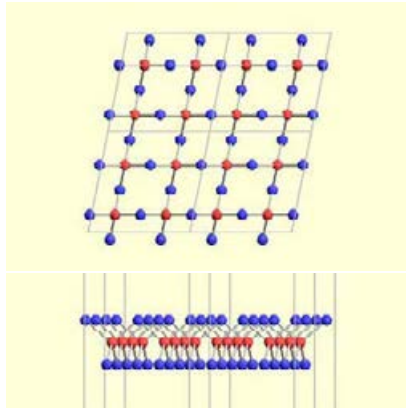

GeSe<sub>2</sub> (H)

×

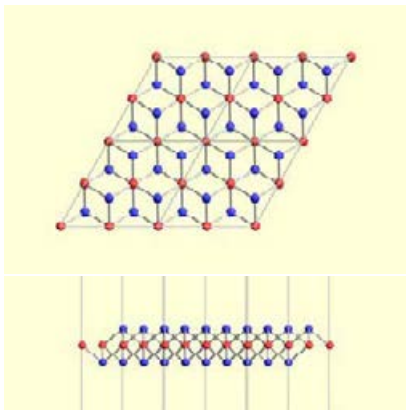

GeBr<sub>2</sub> (T)

×

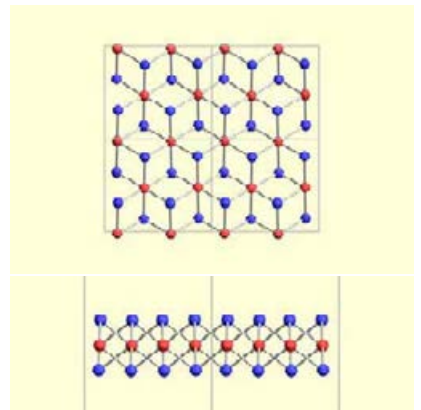

GeBr<sub>2</sub> (P)

×

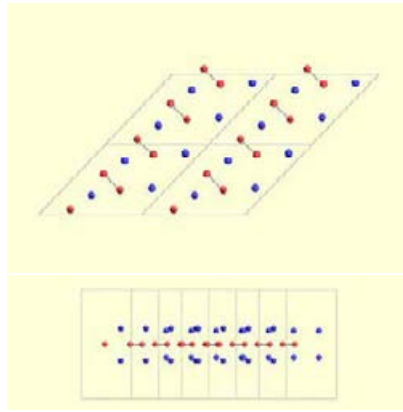

GeRb<sub>2</sub> (H)

×

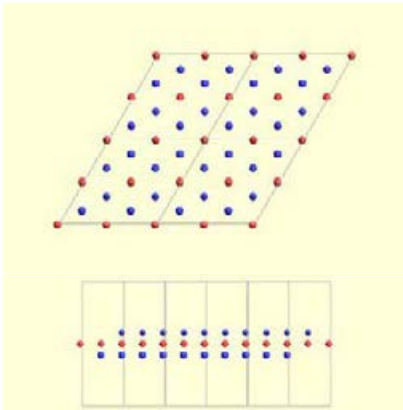

GeSr<sub>2</sub> (T)

×

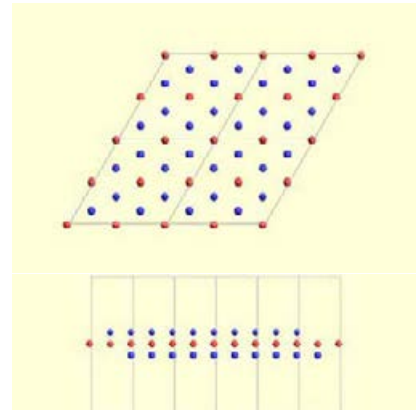

GeSr<sub>2</sub> (P)

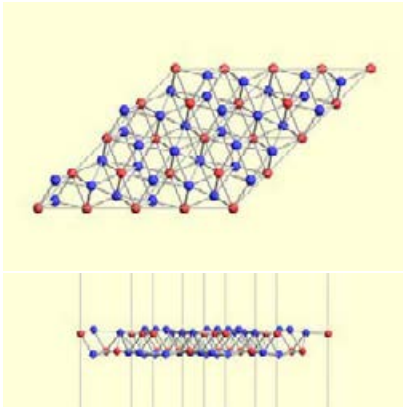

GePd<sub>2</sub> (T)

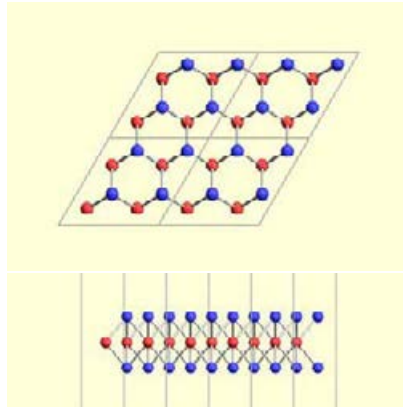

GePd<sub>2</sub> (H)

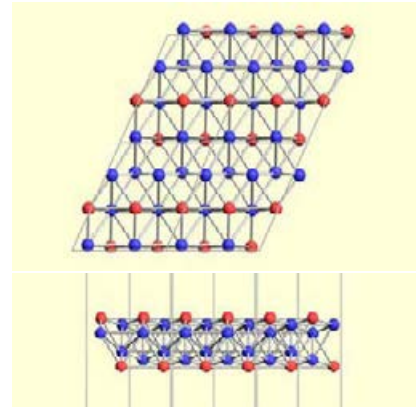

GePd<sub>2</sub> (P)

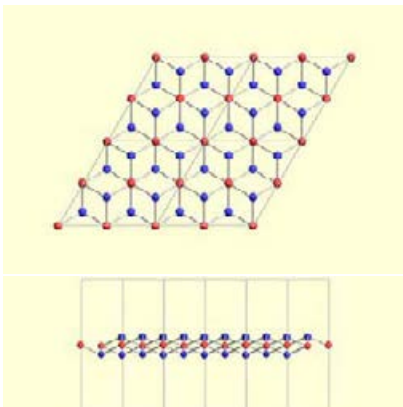

GeCd<sub>2</sub> (T)

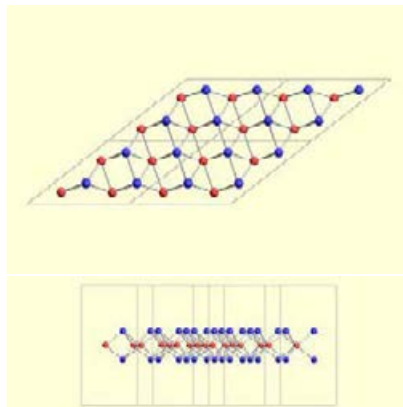

GeCd<sub>2</sub> (H)

×



×

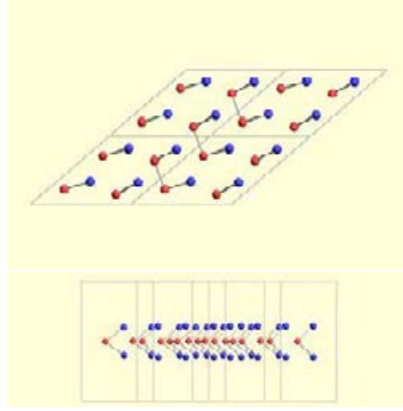

GeIn<sub>2</sub> (H)

×

×

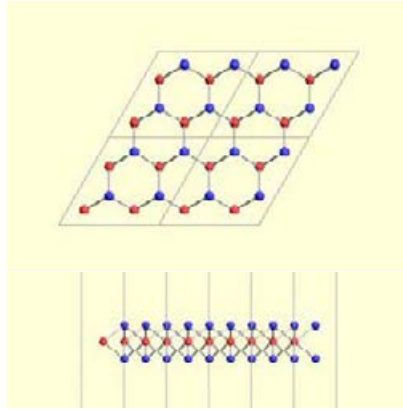

GeSn<sub>2</sub> (H)

×

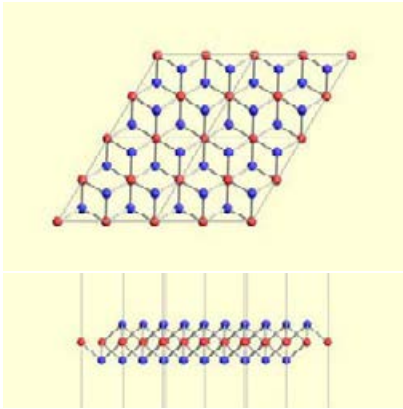

GeTe<sub>2</sub> (T)

×

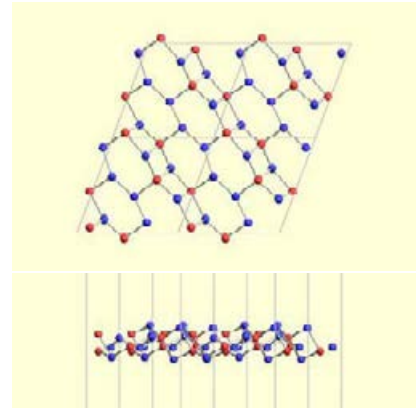

GeTe<sub>2</sub> (P)

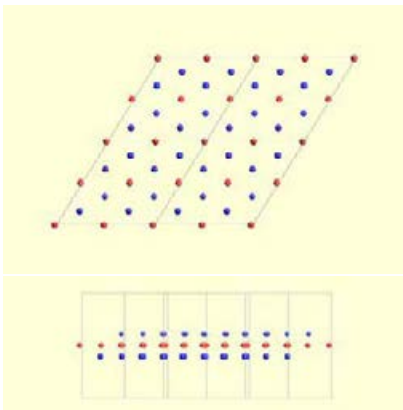

GeCs<sub>2</sub> (T)

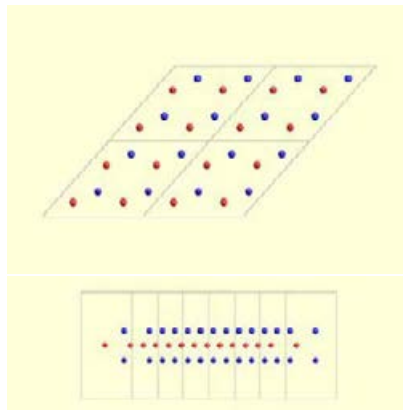

GeCs<sub>2</sub> (H)

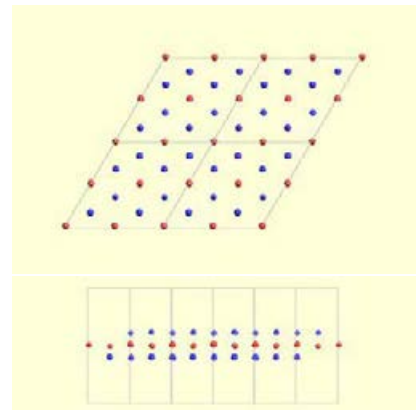

GeCs<sub>2</sub> (P)

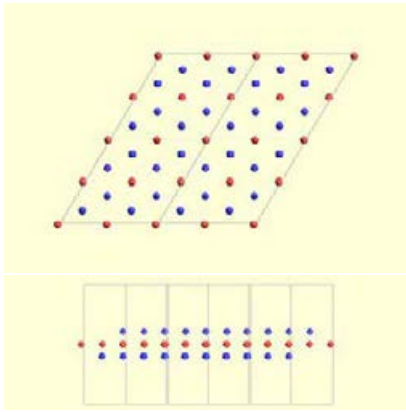

GeBa<sub>2</sub> (T)

×

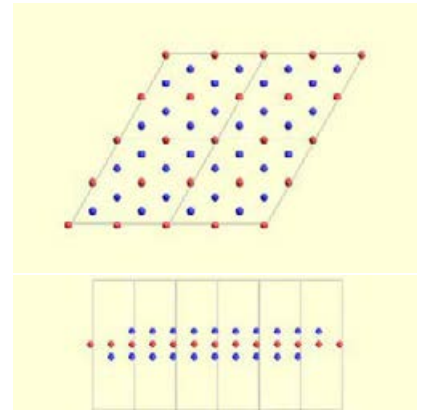

GeBa<sub>2</sub> (P)

×

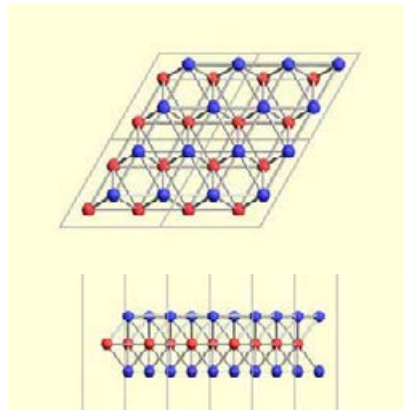

GePt<sub>2</sub> (H)

×

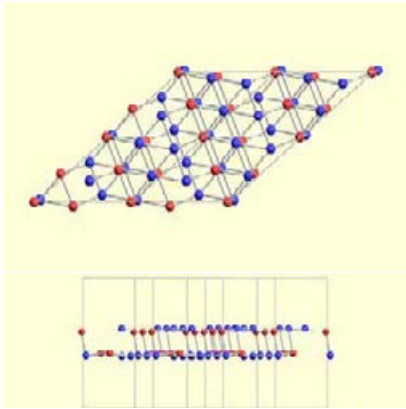

GeAu<sub>2</sub> (T)

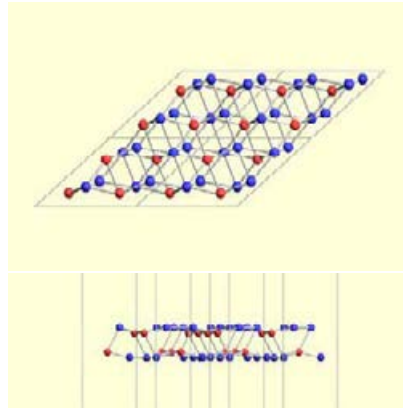

GeAu<sub>2</sub> (H)

×

×

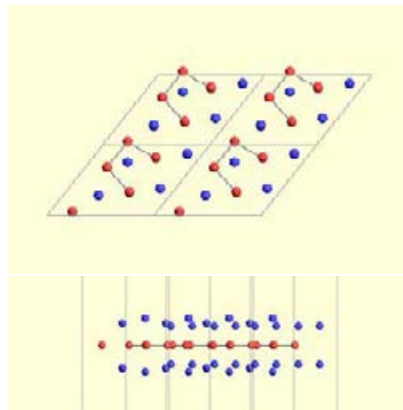

GeTl<sub>2</sub> (H)

×

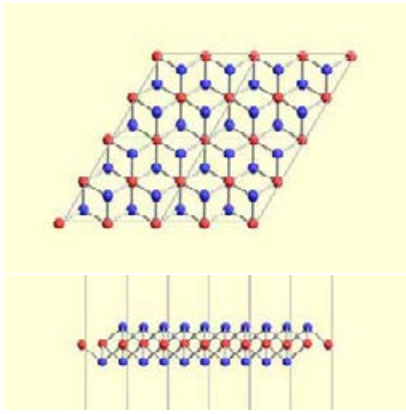

$\text{AsS}_2$  (T)

×

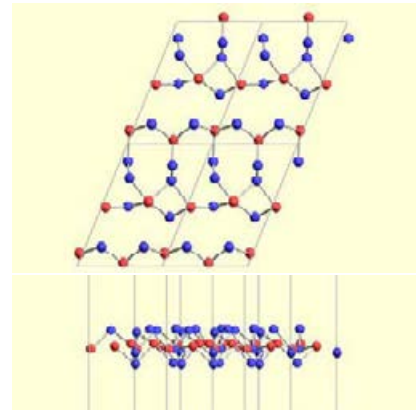

$\text{AsS}_2$  (P)

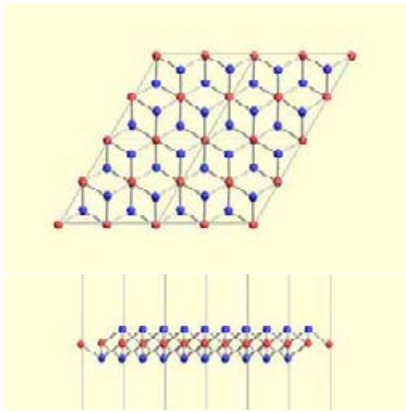

$\text{AsCa}_2$  (T)

×

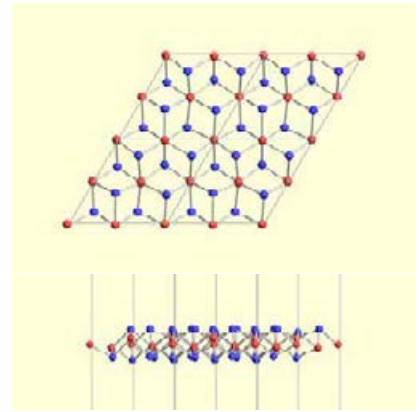

$\text{AsCa}_2$  (P)

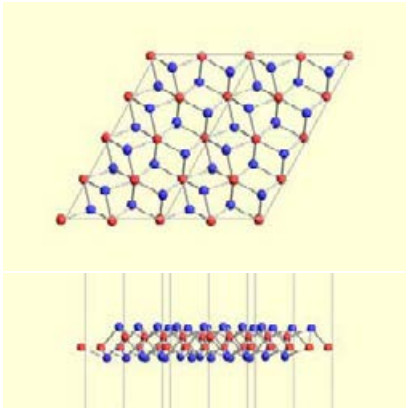

$\text{AsSc}_2$  (T)

×

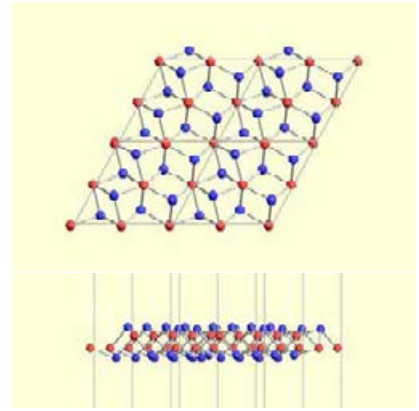

$\text{AsSc}_2$  (P)

×

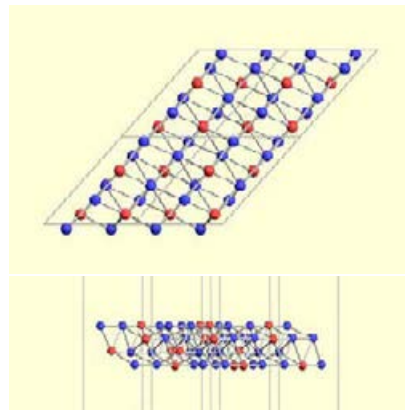

$\text{AsTi}_2$  (H)

×

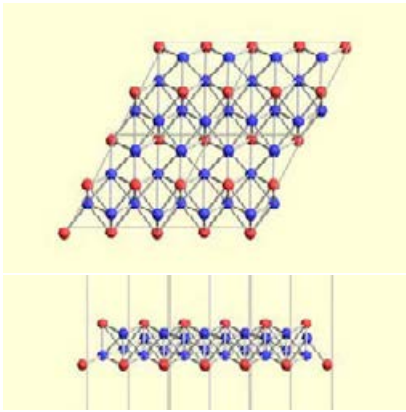

AsV<sub>2</sub> (T)

×

×

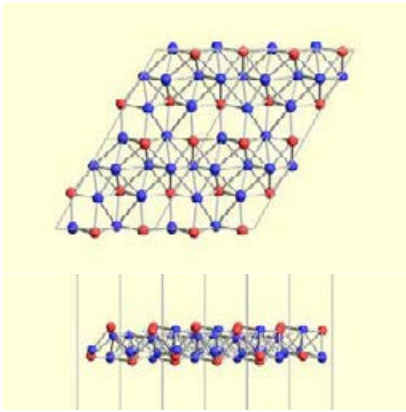

AsCr<sub>2</sub> (T)

×

×

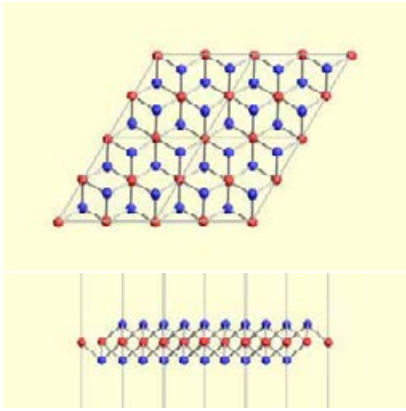

AsSe<sub>2</sub> (T)

×

×

×

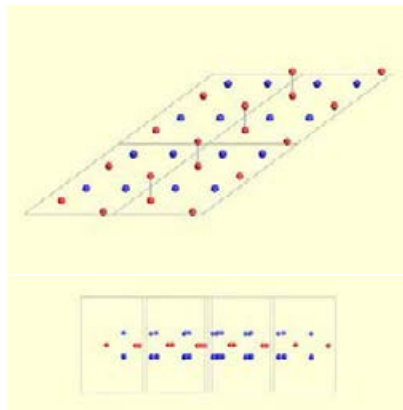

AsRb<sub>2</sub> (H)

×

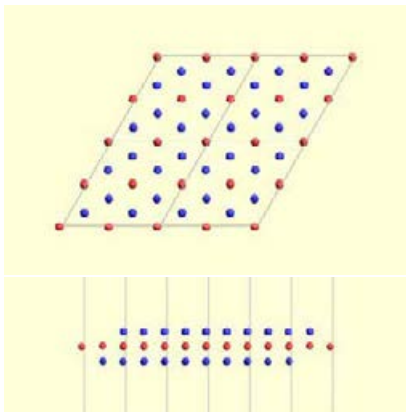

AsSr<sub>2</sub> (T)

×

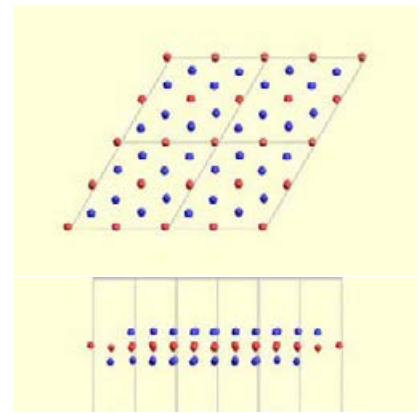

AsSr<sub>2</sub> (P)

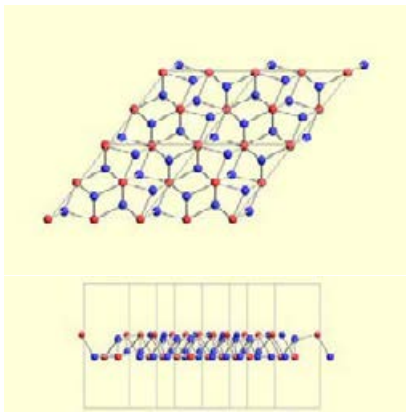

AsZr<sub>2</sub> (T)

×

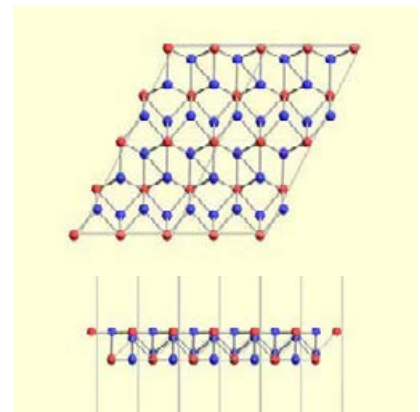

AsZr<sub>2</sub> (P)

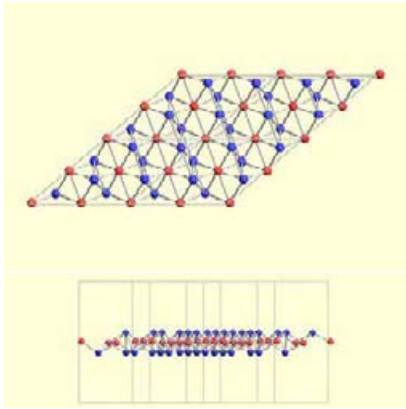

AsPd<sub>2</sub> (T)

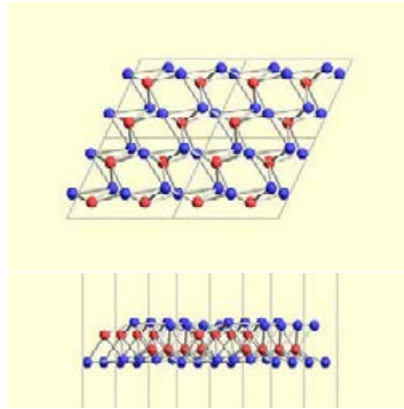

AsPd<sub>2</sub> (H)

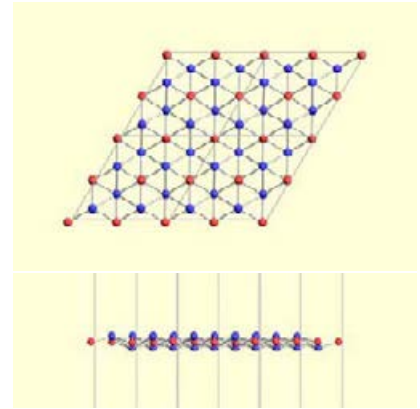

AsPd<sub>2</sub> (P)

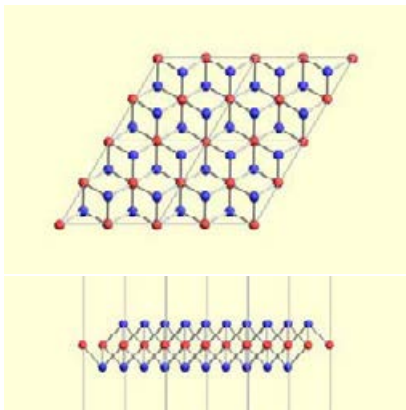

AsSn<sub>2</sub> (T)

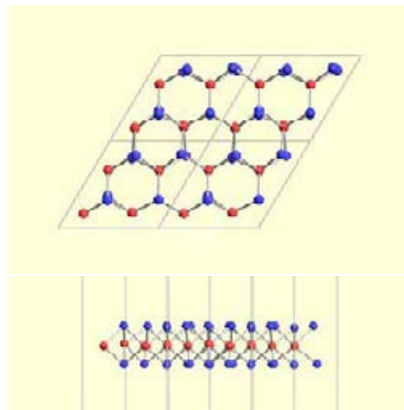

AsSn<sub>2</sub> (H)

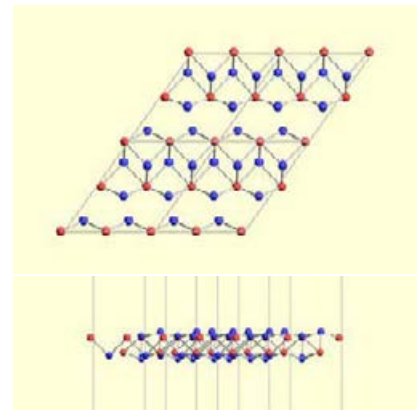

AsSn<sub>2</sub> (P)



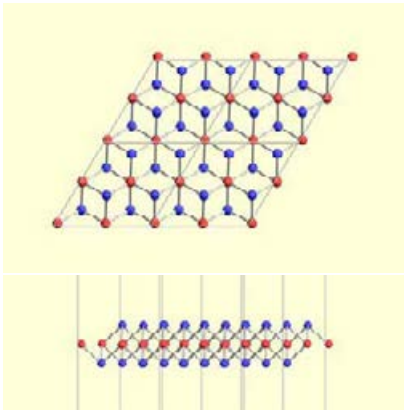

AsTe<sub>2</sub> (T)

×

×

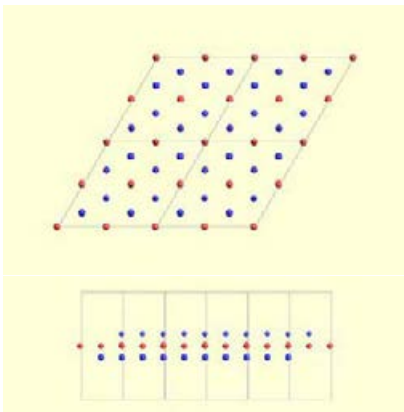

AsCs<sub>2</sub> (T)

×

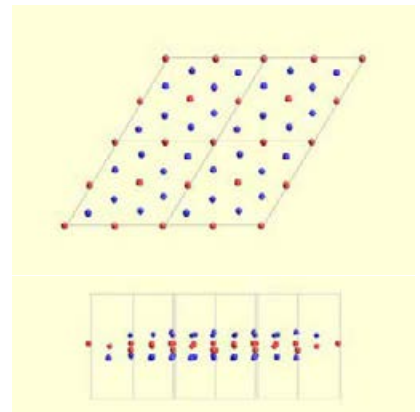

AsCs<sub>2</sub> (P)

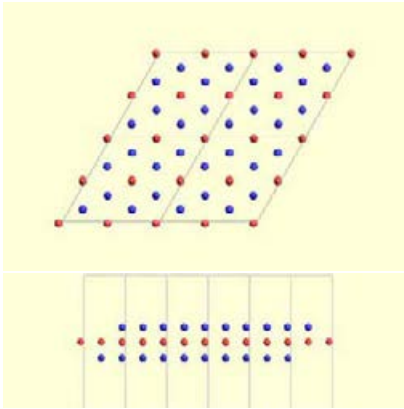

AsBa<sub>2</sub> (T)

×

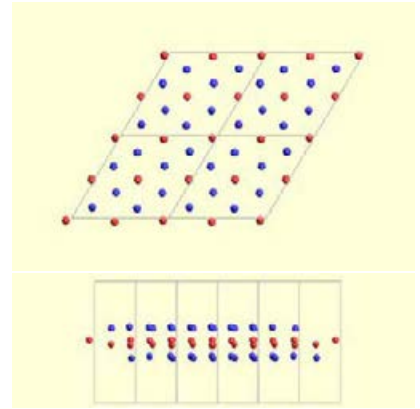

AsBa<sub>2</sub> (P)

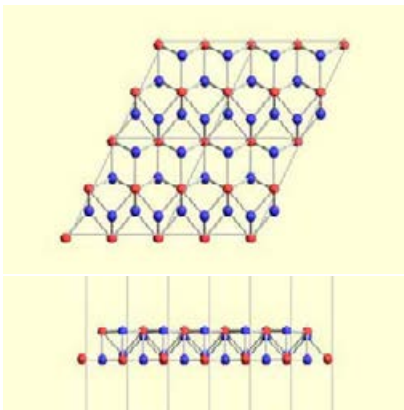

AsHf<sub>2</sub> (T)

×

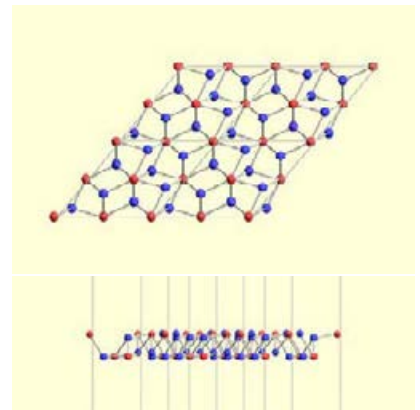

AsHf<sub>2</sub> (P)

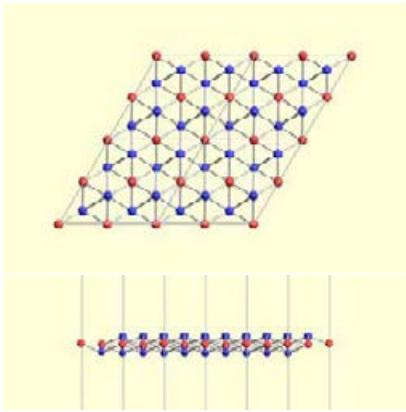

SeLi<sub>2</sub> (T)

×

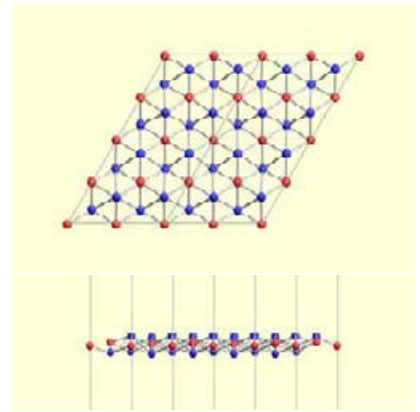

SeLi<sub>2</sub> (P)

×

×

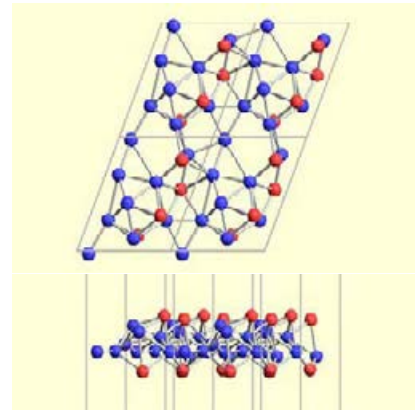

SeBe<sub>2</sub> (P)

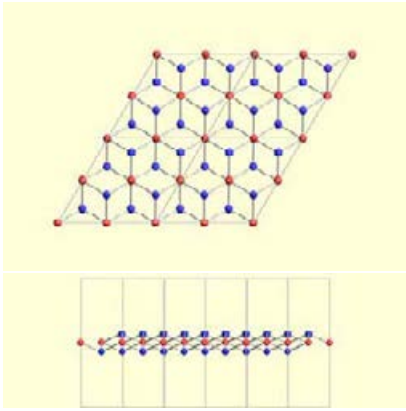

SeNa<sub>2</sub> (T)

×

×

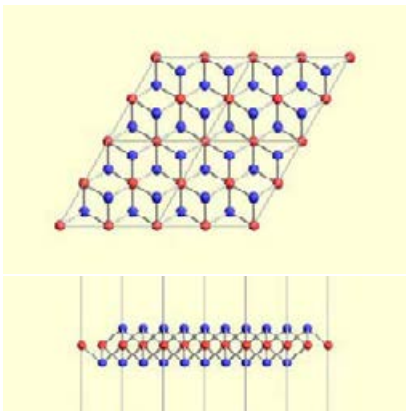

SeS<sub>2</sub> (T)

×

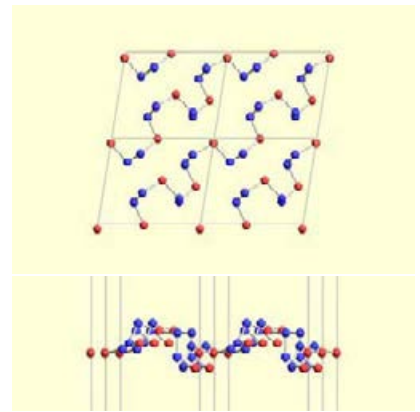

SeS<sub>2</sub> (P)

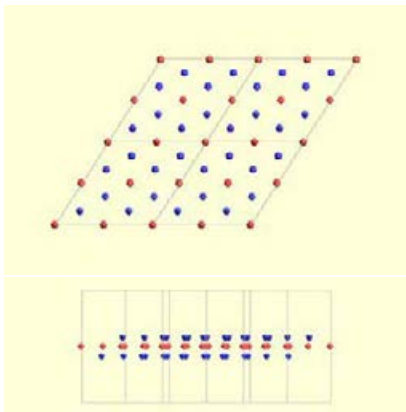

SeK<sub>2</sub> (T)

×

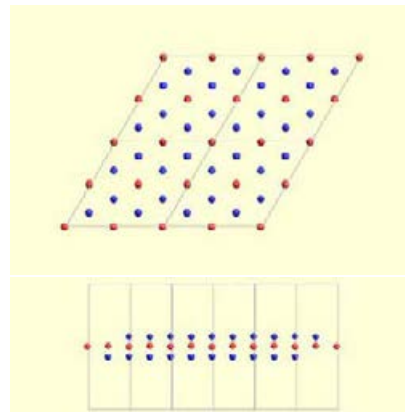

SeK<sub>2</sub> (P)

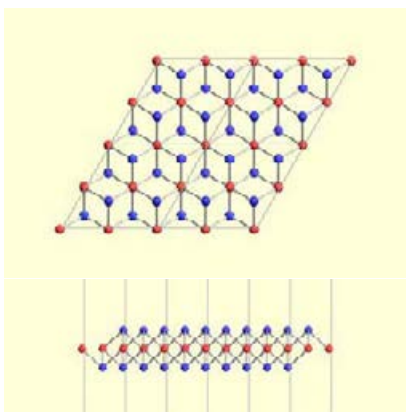

SeCa<sub>2</sub> (T)

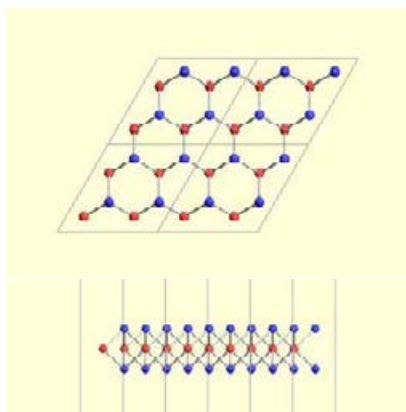

SeCa<sub>2</sub> (H)

×

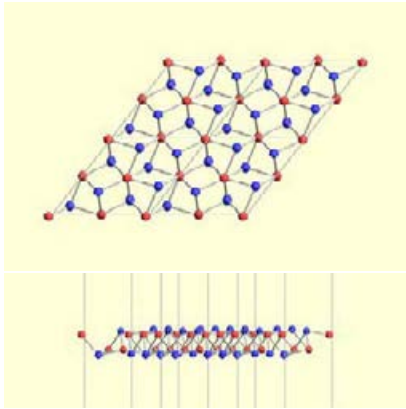

SeSc<sub>2</sub> (T)

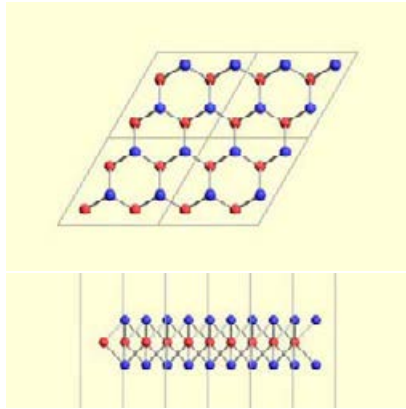

SeSc<sub>2</sub> (H)

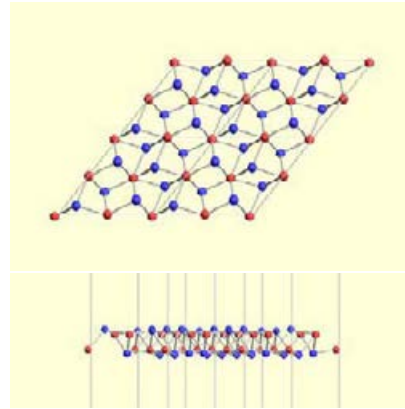

SeSc<sub>2</sub> (P)

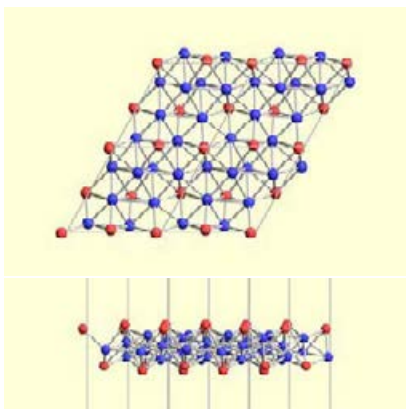

SeV<sub>2</sub> (T)

×

×

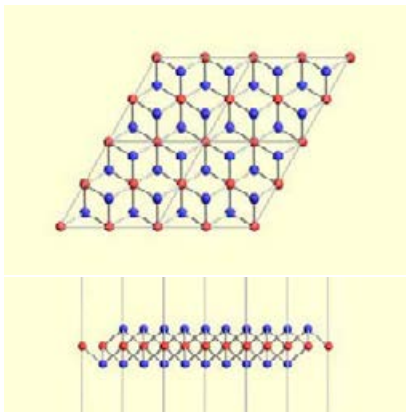

SeSe<sub>2</sub> (T)

×

×

×

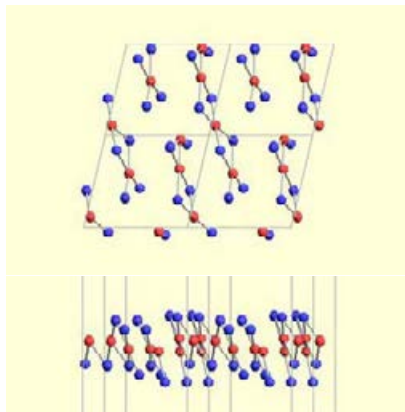

SeBr<sub>2</sub> (H)

×

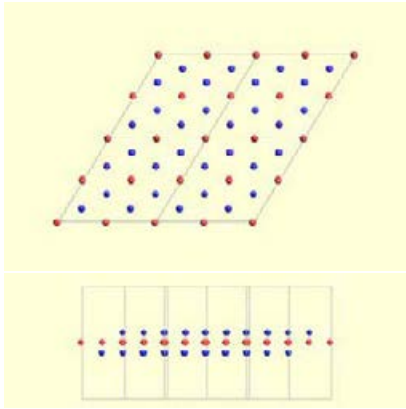

SeRb<sub>2</sub> (T)

×

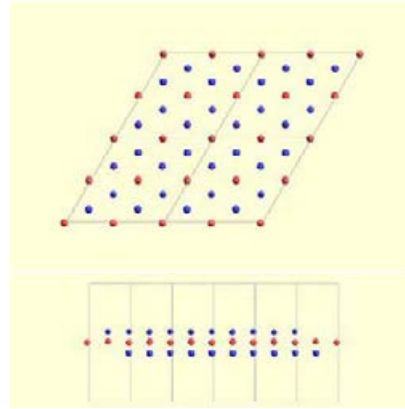

SeRb<sub>2</sub> (P)

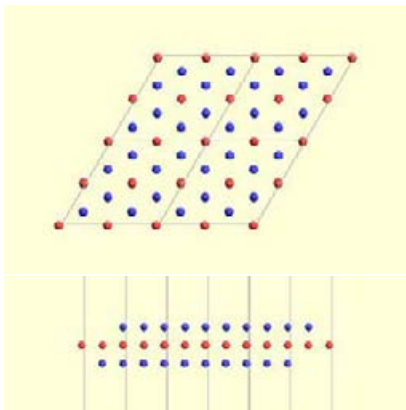

SeSr<sub>2</sub> (T)

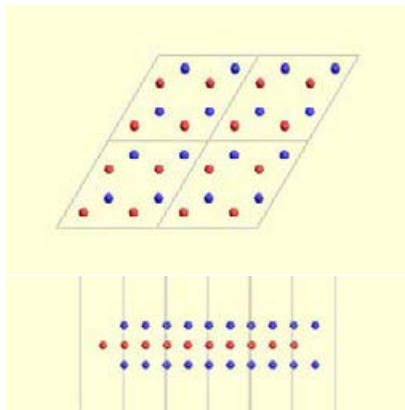

SeSr<sub>2</sub> (H)

×

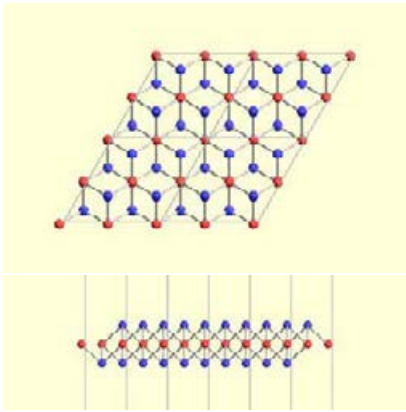

SeY<sub>2</sub> (T)

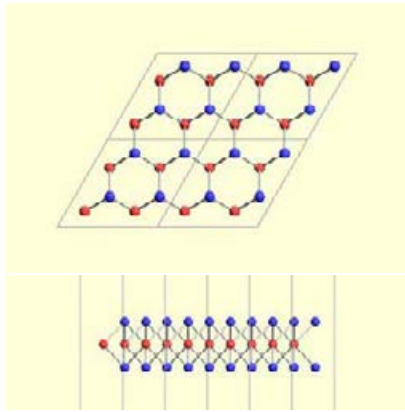

SeY<sub>2</sub> (H)

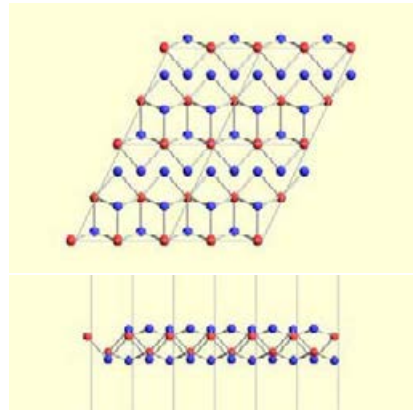

SeY<sub>2</sub> (P)

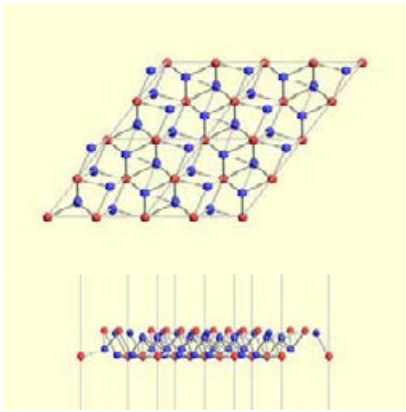

SeZr<sub>2</sub> (T)

×

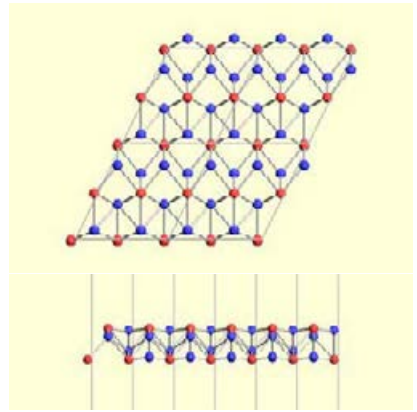

SeZr<sub>2</sub> (P)

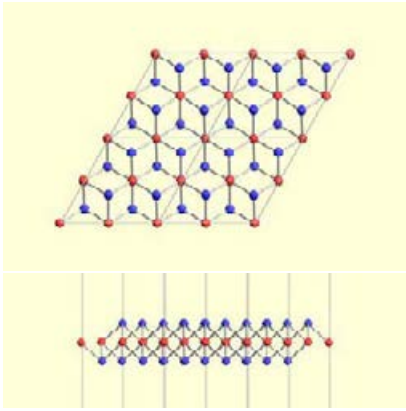

SeIn<sub>2</sub> (T)

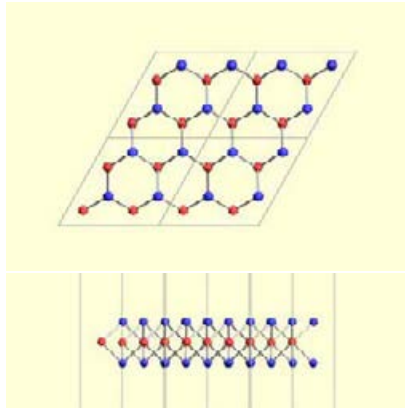

SeIn<sub>2</sub> (H)

×

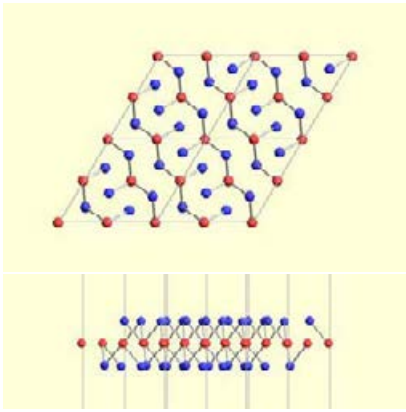

SeSn<sub>2</sub> (T)

×

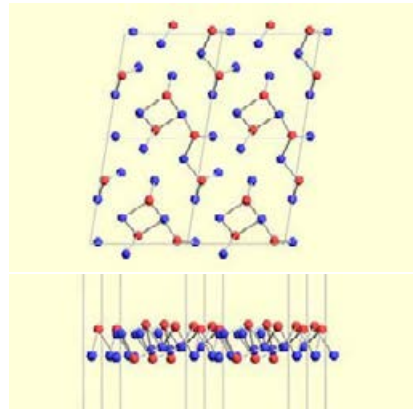

SeSn<sub>2</sub> (P)



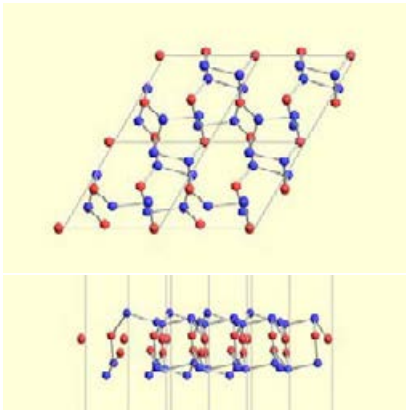

SeSb<sub>2</sub> (T)

×

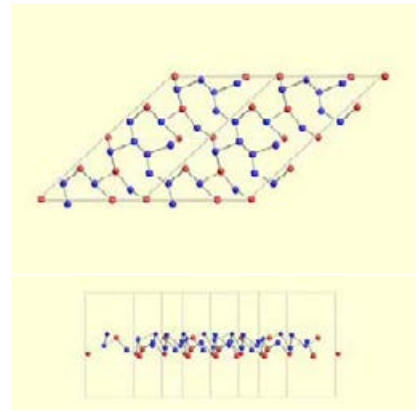

SeSb<sub>2</sub> (P)

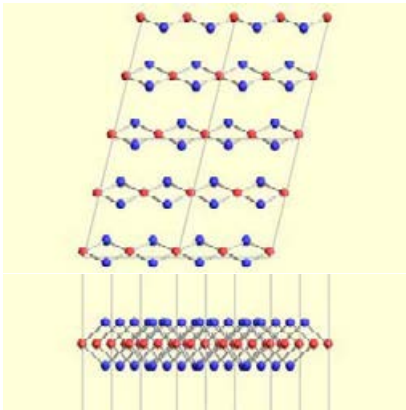

SeI<sub>2</sub> (T)

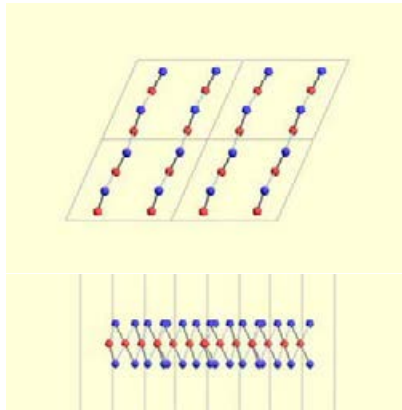

SeI<sub>2</sub> (H)

×

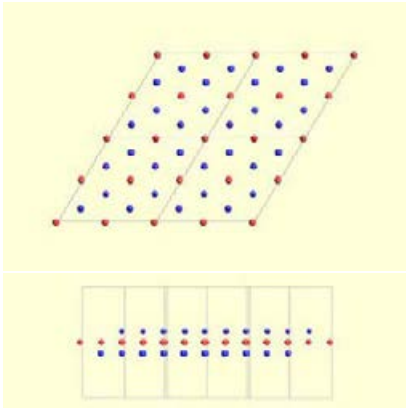

SeCs<sub>2</sub> (T)

×

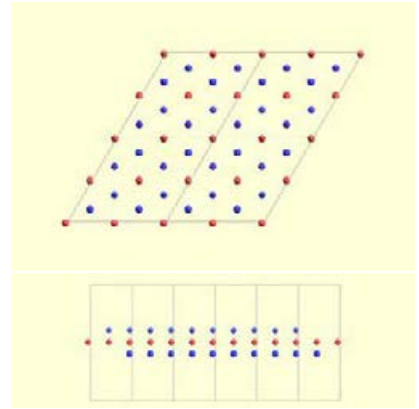

SeCs<sub>2</sub> (P)

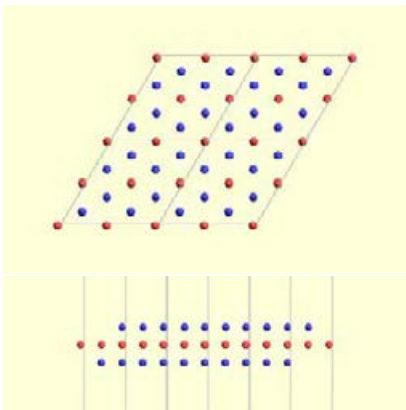

SeBa<sub>2</sub> (T)

×

×

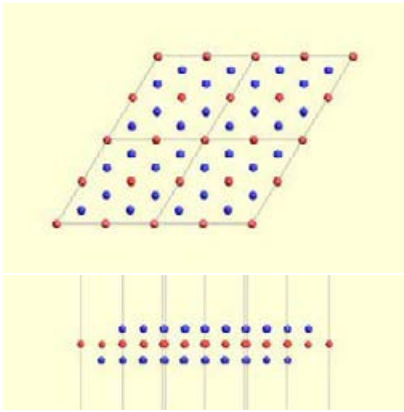

SeTe<sub>2</sub> (T)

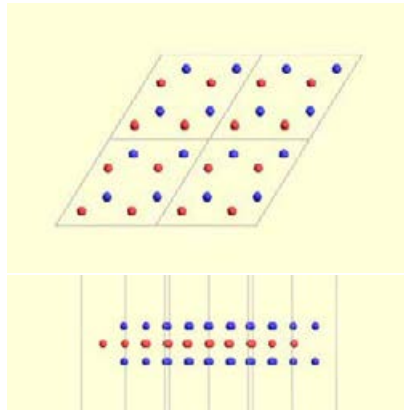

SeTe<sub>2</sub> (H)

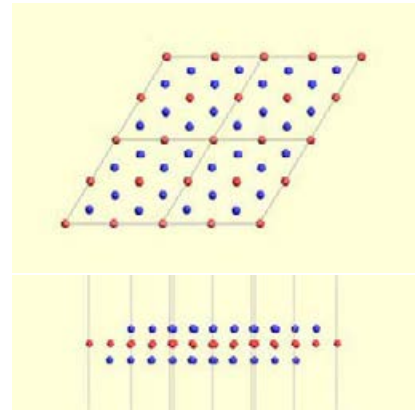

SeTe<sub>2</sub> (P)

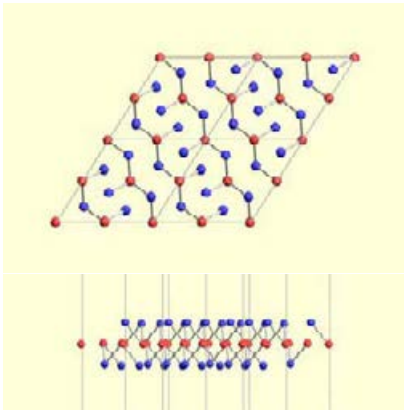

SePb<sub>2</sub> (T)

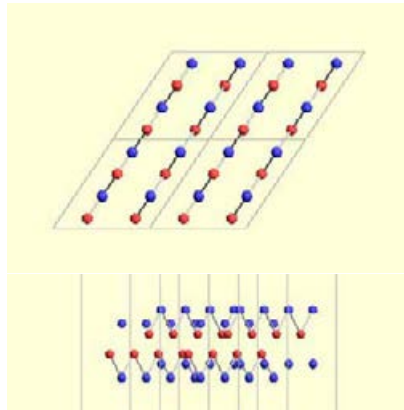

SePb<sub>2</sub> (H)

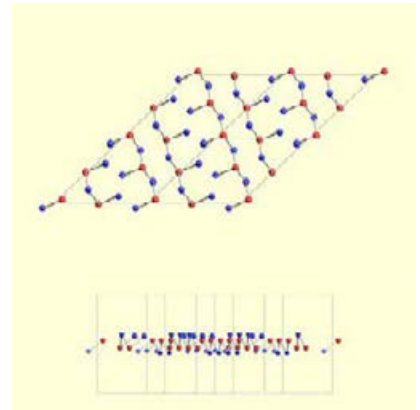

SePb<sub>2</sub> (P)

×

×

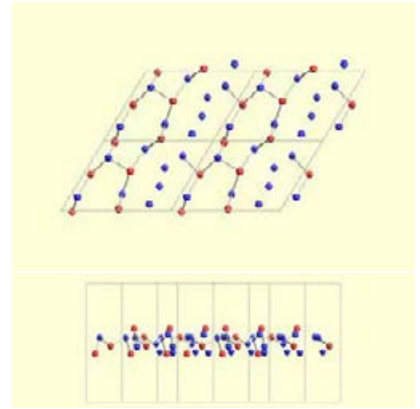

SeBi<sub>2</sub> (P)

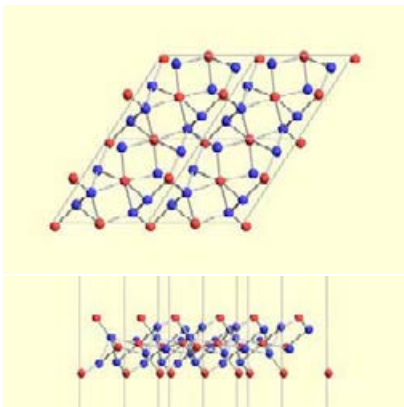

BrLi<sub>2</sub> (T)

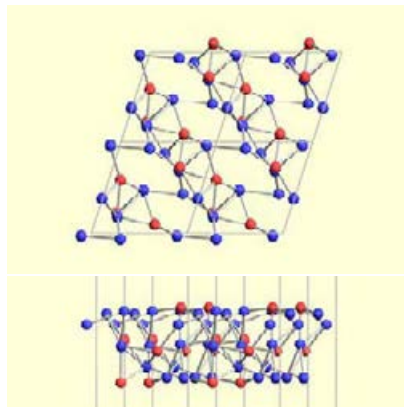

BrLi<sub>2</sub> (H)

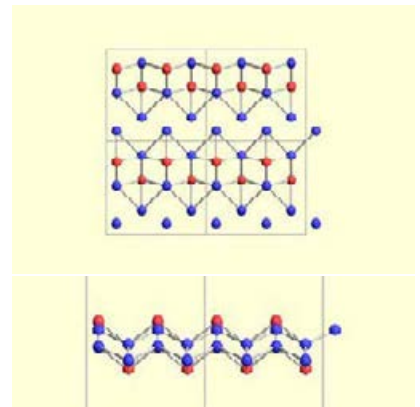

BrLi<sub>2</sub> (P)

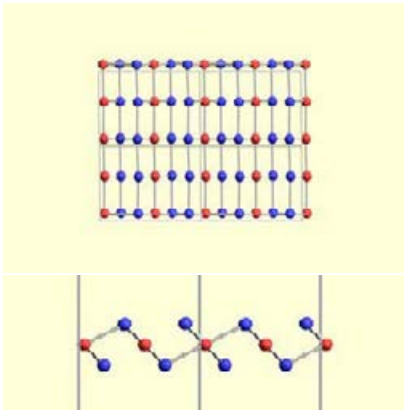

$\text{BrF}_2$  (T)

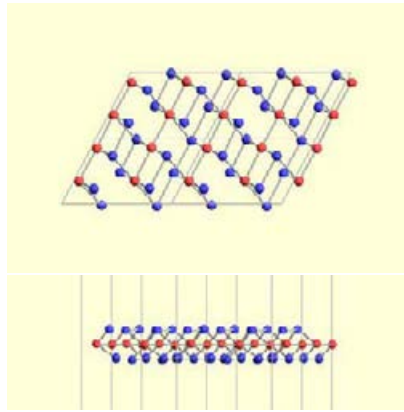

$\text{BrF}_2$  (H)

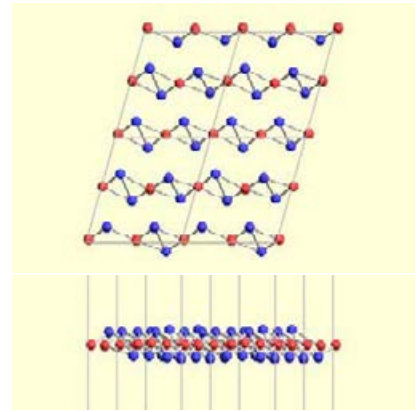

$\text{BrF}_2$  (P)

×

×

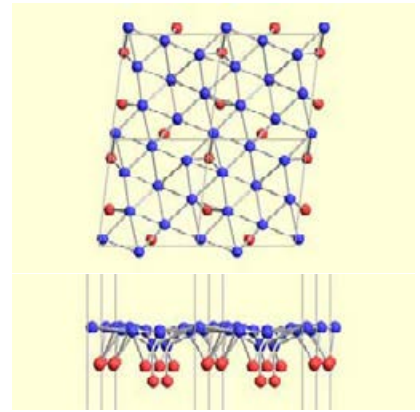

$\text{BrAl}_2$  (P)

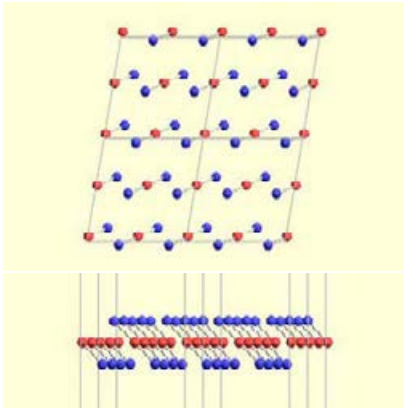

$\text{BrCl}_2$  (T)

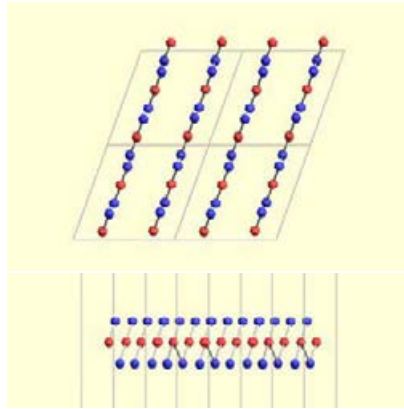

$\text{BrCl}_2$  (H)

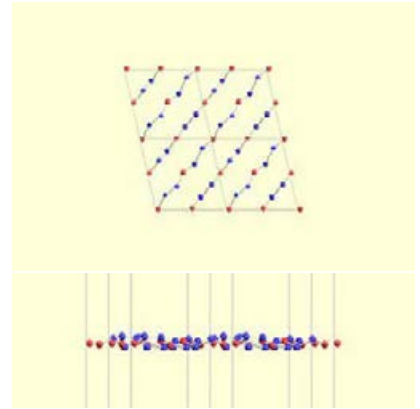

$\text{BrCl}_2$  (P)

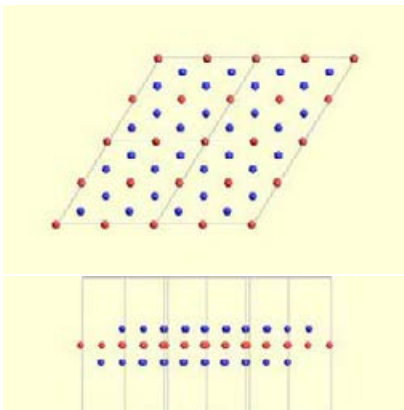

$\text{BrK}_2$  (T)

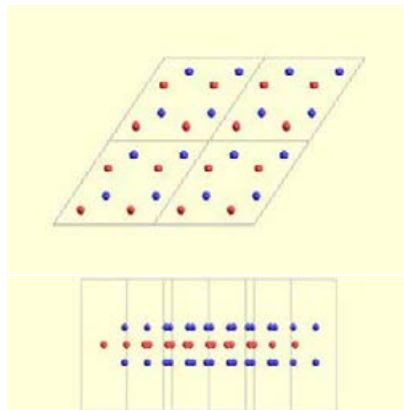

$\text{BrK}_2$  (H)

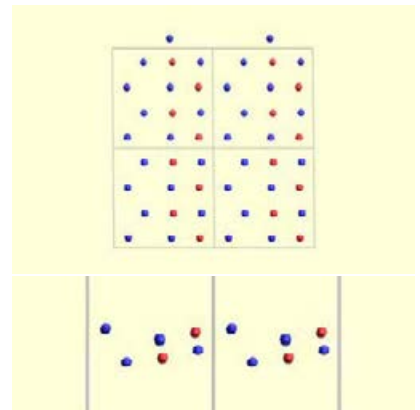

$\text{BrK}_2$  (P)

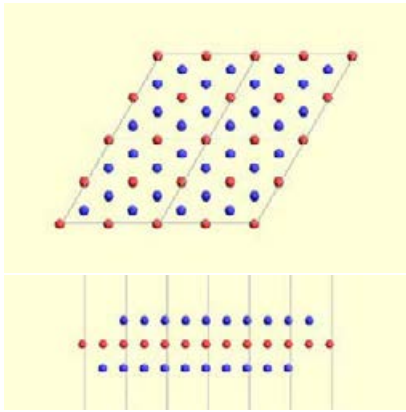

BrCa<sub>2</sub> (T)

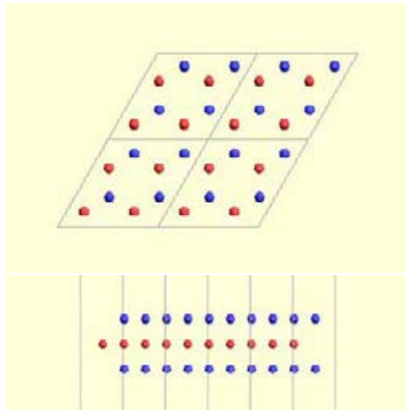

BrCa<sub>2</sub> (H)

×

×

×

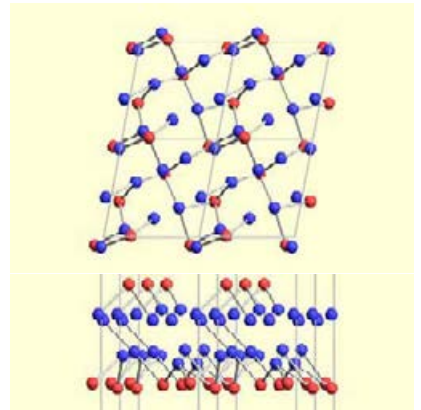

BrSc<sub>2</sub> (P)

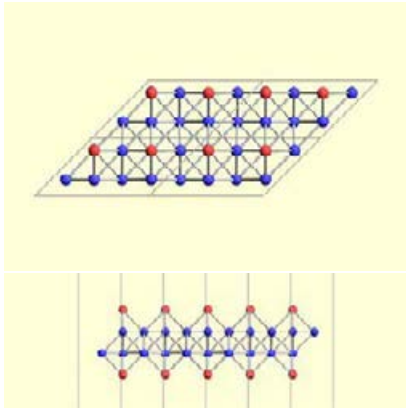

BrTi<sub>2</sub> (T)

×

×

×

×

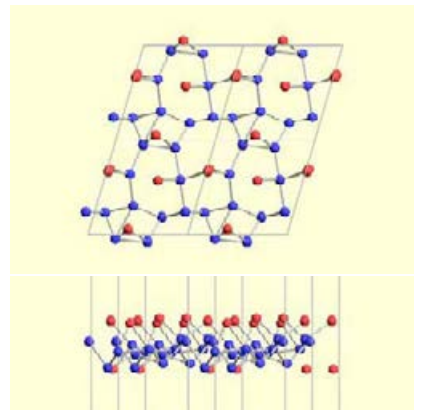

BrGe<sub>2</sub> (P)



×

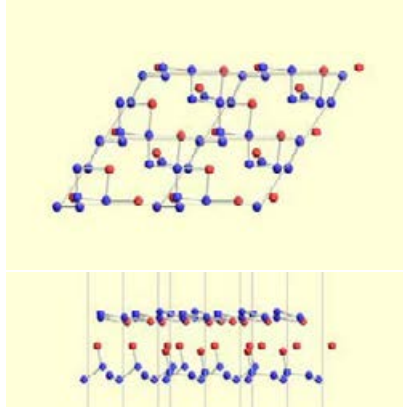

BrSe<sub>2</sub> (H)

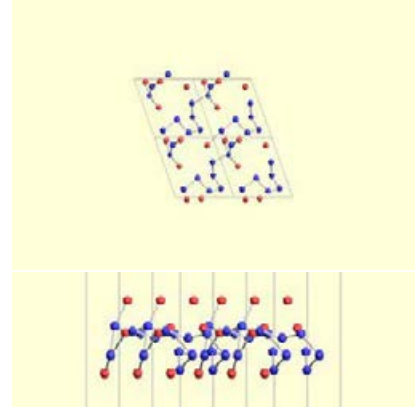

BrSe<sub>2</sub> (P)

×

×

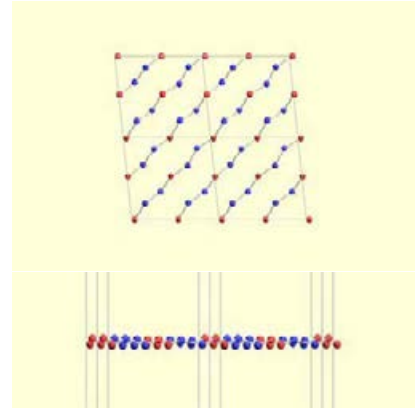

BrBr<sub>2</sub> (P)

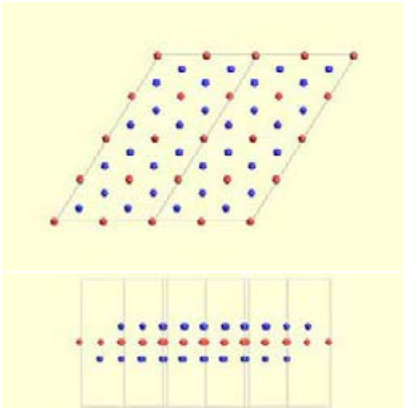

BrRb<sub>2</sub> (T)

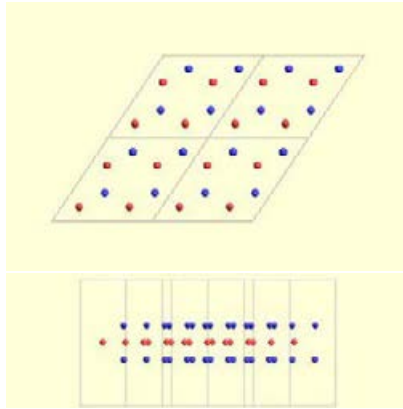

BrRb<sub>2</sub> (H)

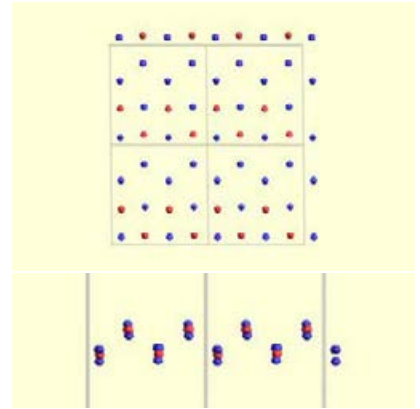

BrRb<sub>2</sub> (P)

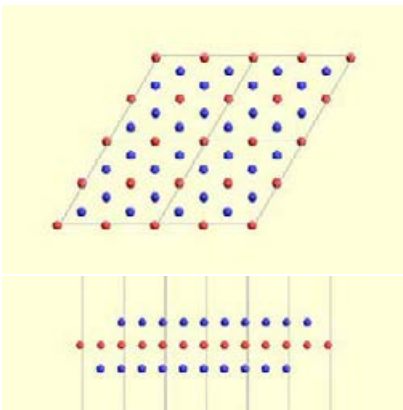

BrSr<sub>2</sub> (T)

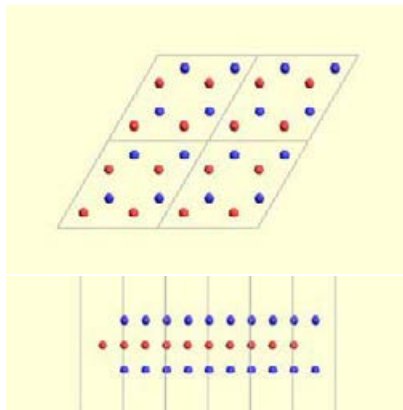

BrSr<sub>2</sub> (H)

×



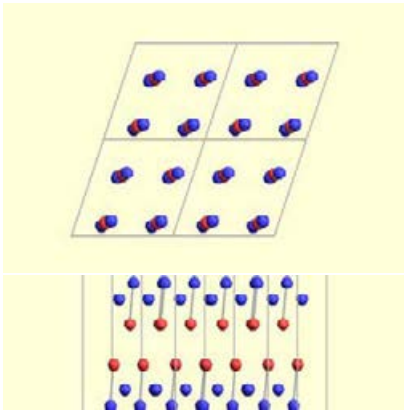

BrSn<sub>2</sub> (T)

×

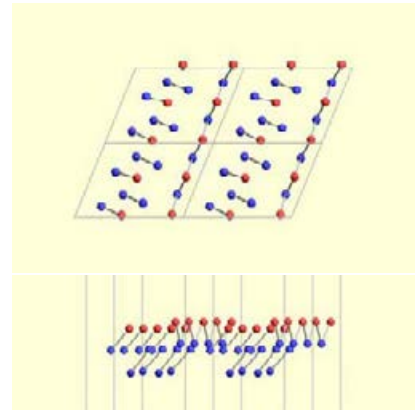

BrSn<sub>2</sub> (P)

×

×

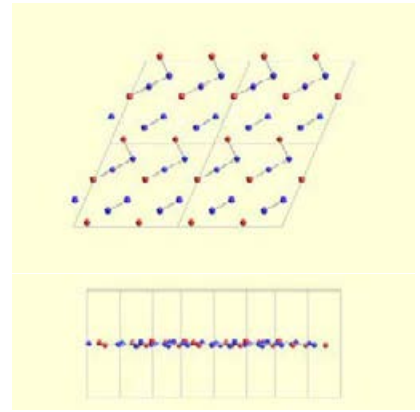

BrI<sub>2</sub> (P)

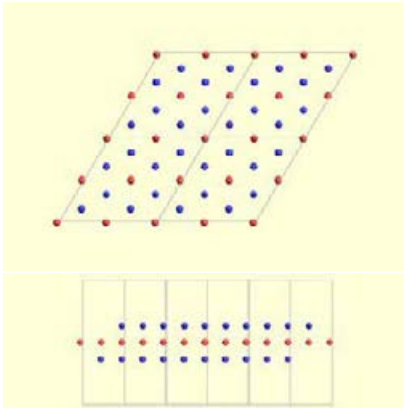

BrCs<sub>2</sub> (T)

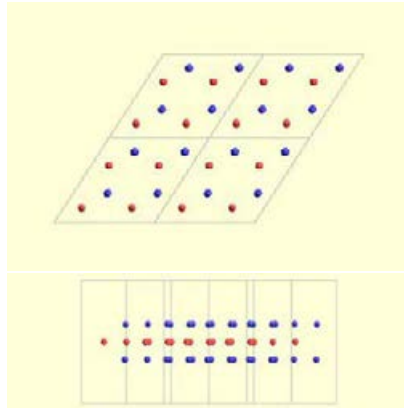

BrCs<sub>2</sub> (H)

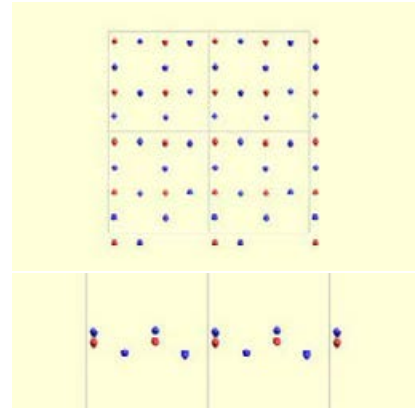

BrCs<sub>2</sub> (P)

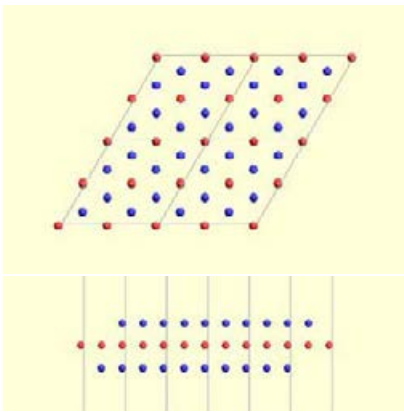

BrBa<sub>2</sub> (T)

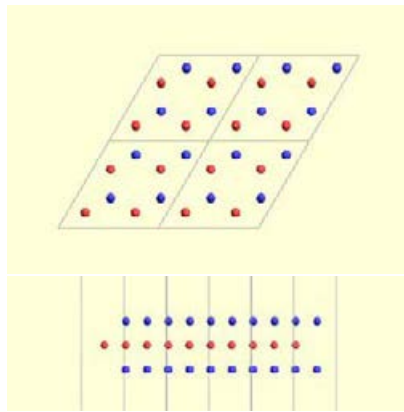

BrBa<sub>2</sub> (H)

×

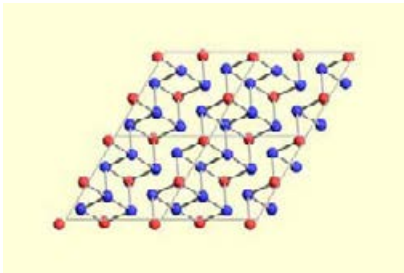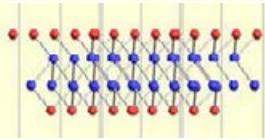

BrHf<sub>2</sub> (T)

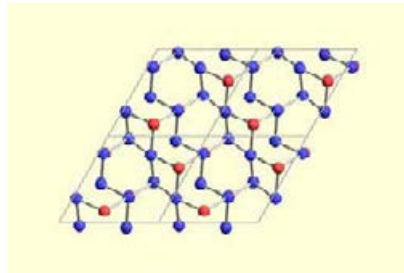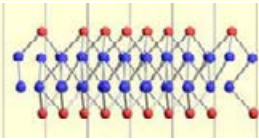

BrHf<sub>2</sub> (H)

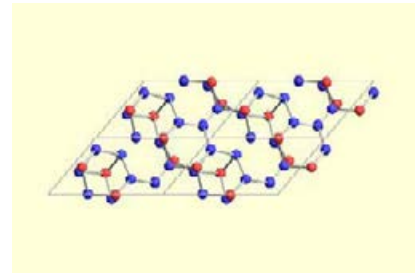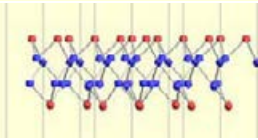

BrHf<sub>2</sub> (P)

×

×

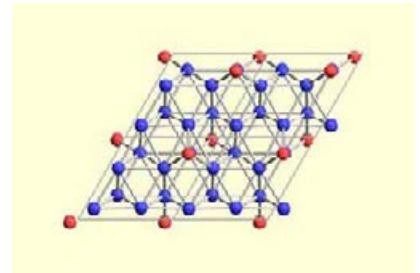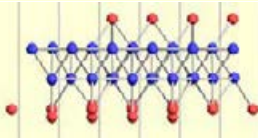

BrRe<sub>2</sub> (P)

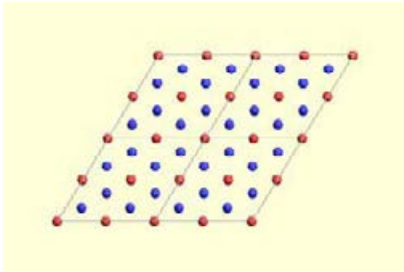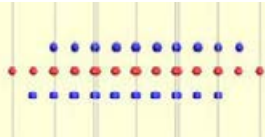

BrTl<sub>2</sub> (T)

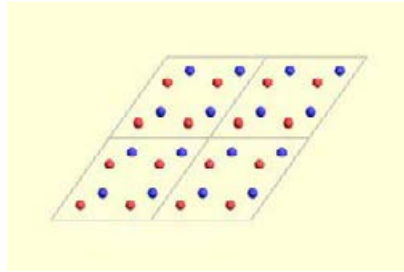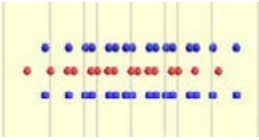

BrTl<sub>2</sub> (H)

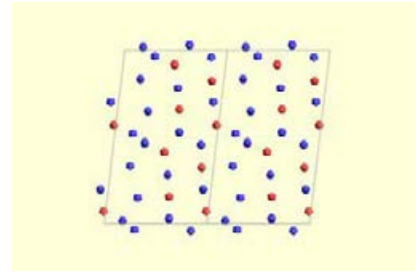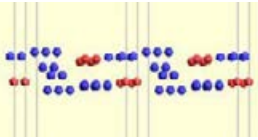

BrTl<sub>2</sub> (P)

×

×

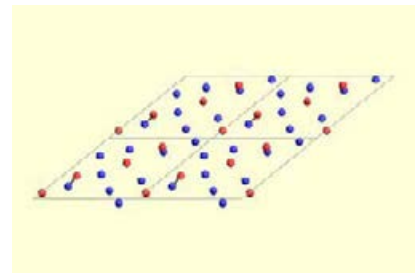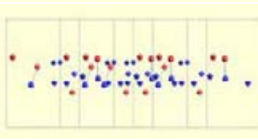

BrPb<sub>2</sub> (P)

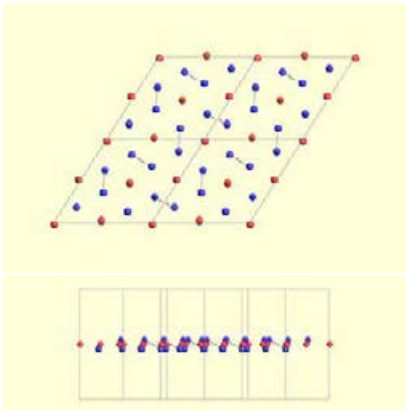

RbN<sub>2</sub> (T)

×

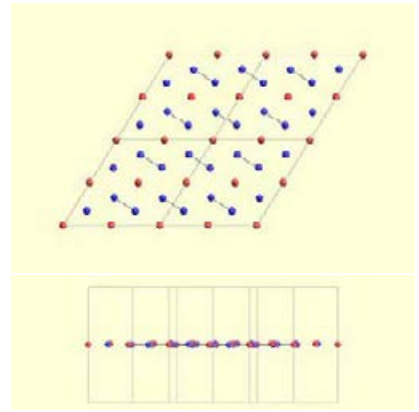

RbN<sub>2</sub> (P)

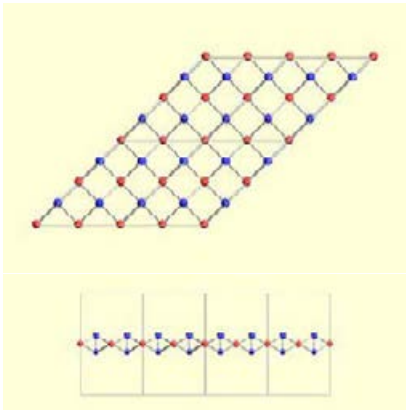

RbF<sub>2</sub> (T)

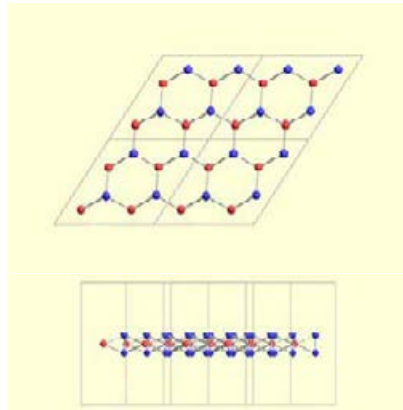

RbF<sub>2</sub> (H)

×

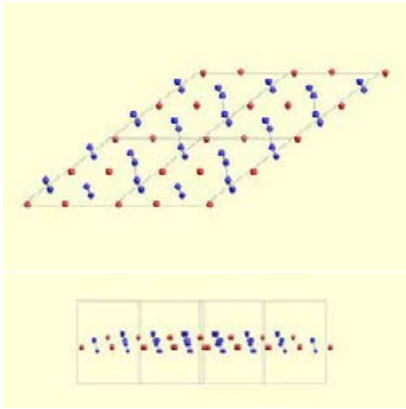

RbS<sub>2</sub> (T)

×

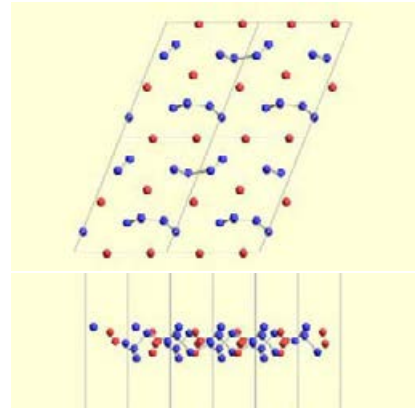

RbS<sub>2</sub> (P)

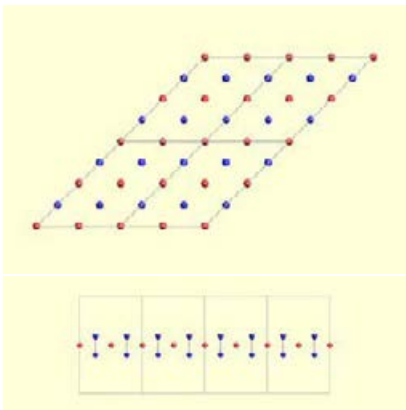

RbCl<sub>2</sub> (T)

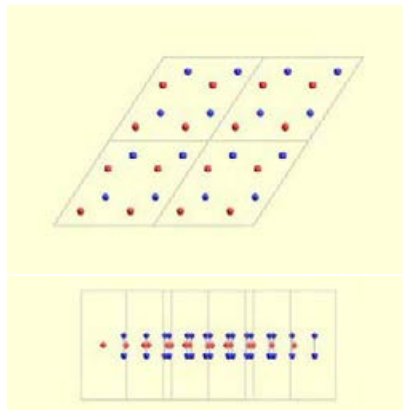

RbCl<sub>2</sub> (H)

×

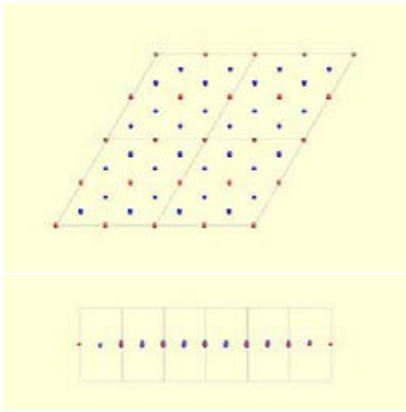

RbK<sub>2</sub> (T)

×

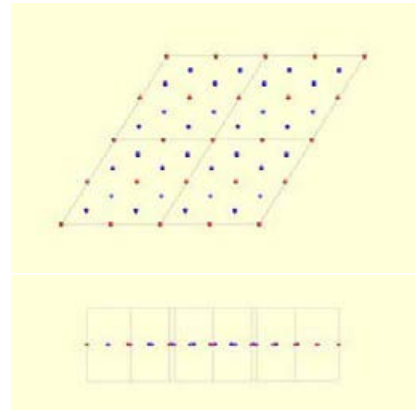

RbK<sub>2</sub> (P)

×

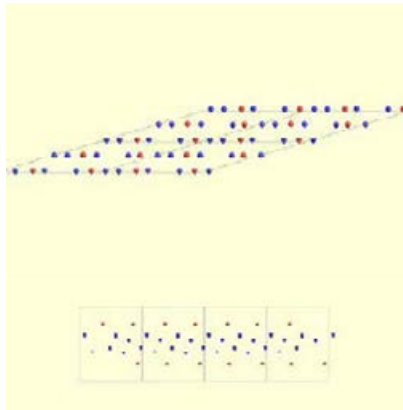

RbCa<sub>2</sub> (H)

×

×

×

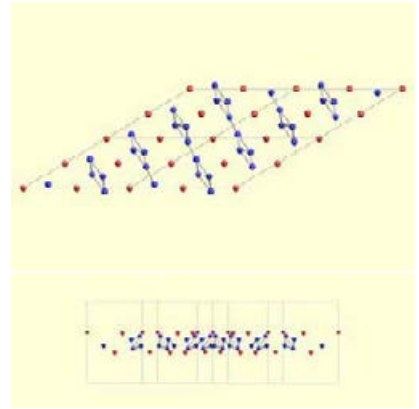

RbGe<sub>2</sub> (P)

×

×

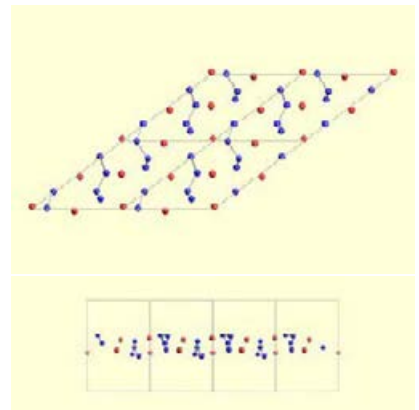

RbSe<sub>2</sub> (P)

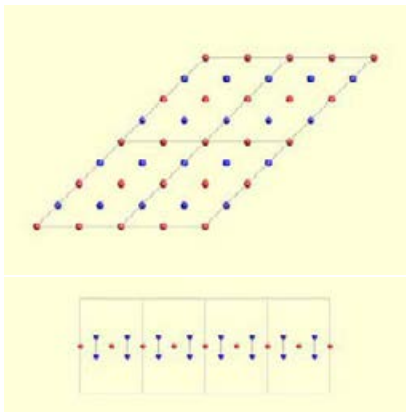

RbBr<sub>2</sub> (T)

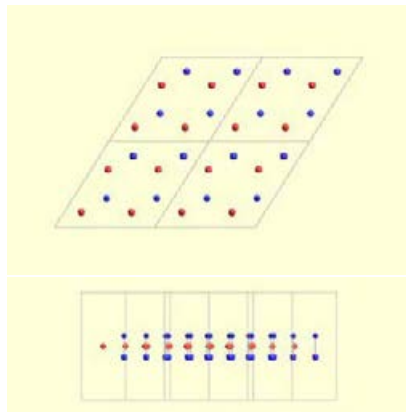

RbBr<sub>2</sub> (H)

×

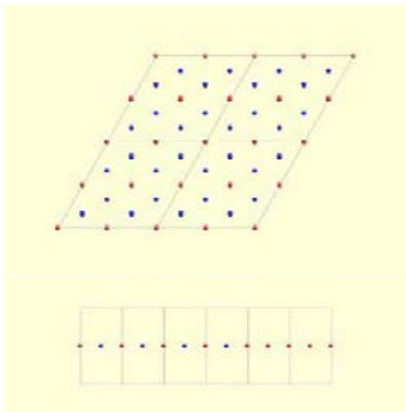

RbSr<sub>2</sub> (T)

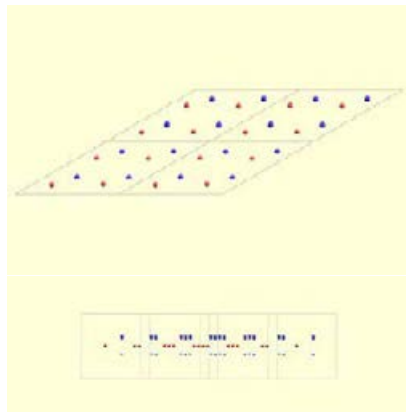

RbSr<sub>2</sub> (H)

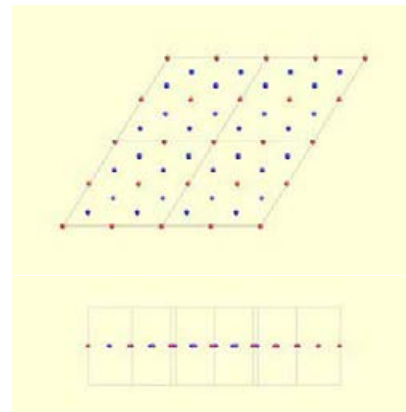

RbSr<sub>2</sub> (P)

×

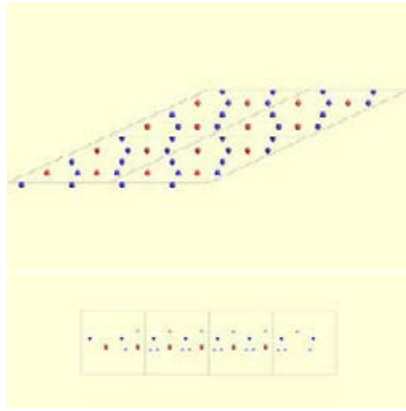

RbY<sub>2</sub> (H)

×

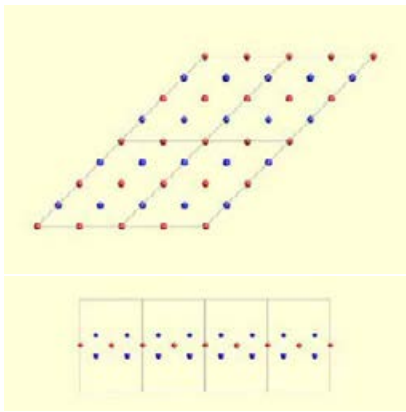

RbI<sub>2</sub> (T)

×

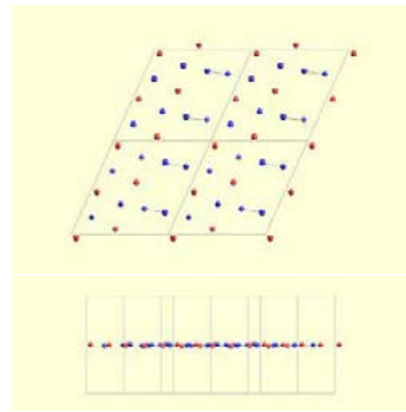

RbI<sub>2</sub> (P)



×

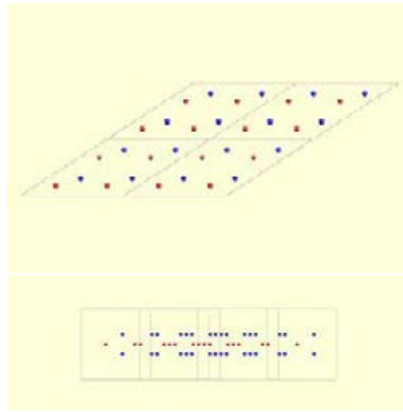

RbBa<sub>2</sub> (H)

×

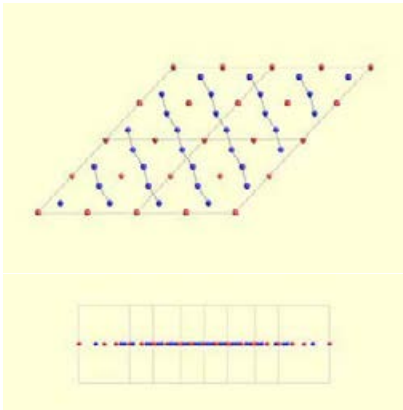

RbAu<sub>2</sub> (T)

×

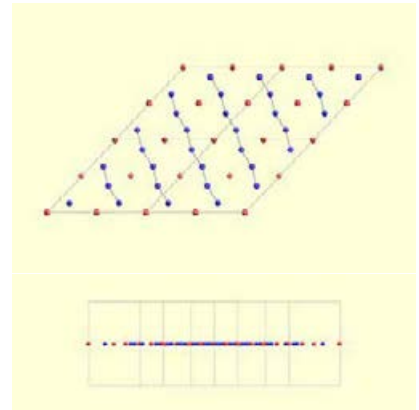

RbAu<sub>2</sub> (P)

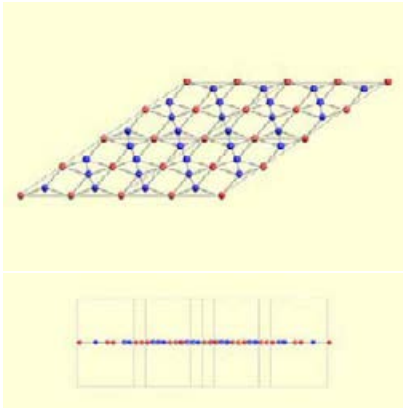

SrB<sub>2</sub> (T)

×

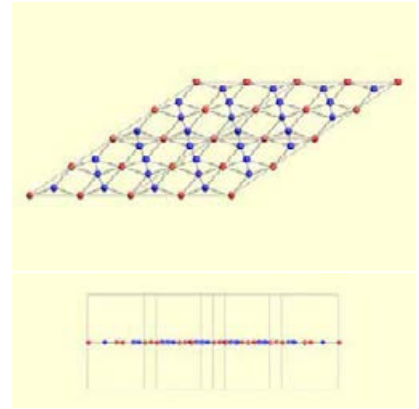

SrB<sub>2</sub> (P)

×

×

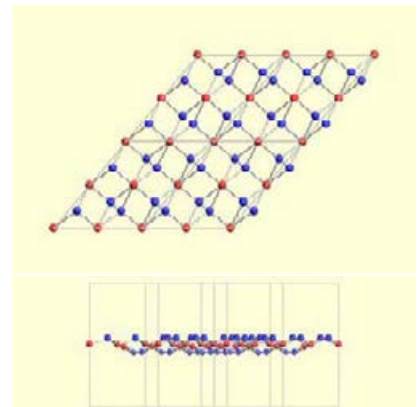

SrC<sub>2</sub> (P)

×

×

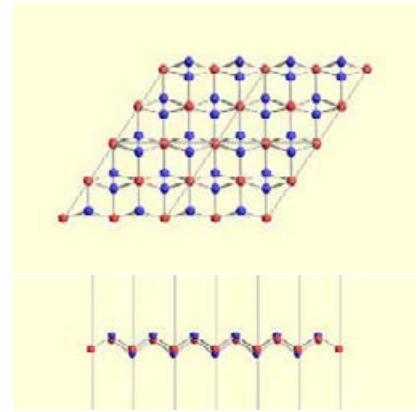

SrN<sub>2</sub> (P)

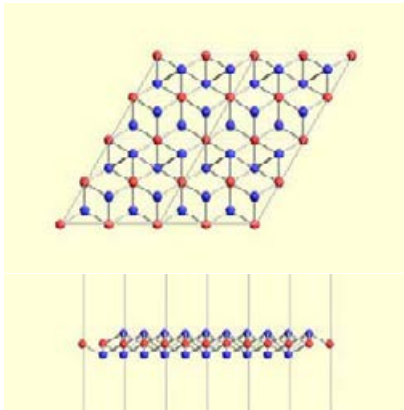

SrF<sub>2</sub> (T)

×

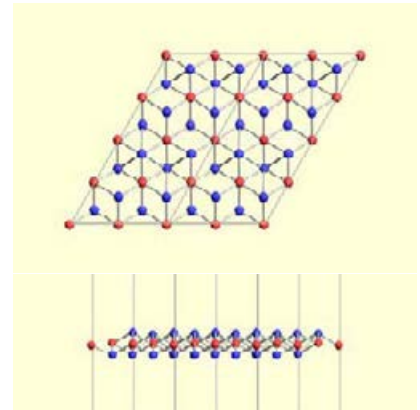

SrF<sub>2</sub> (P)

×

×

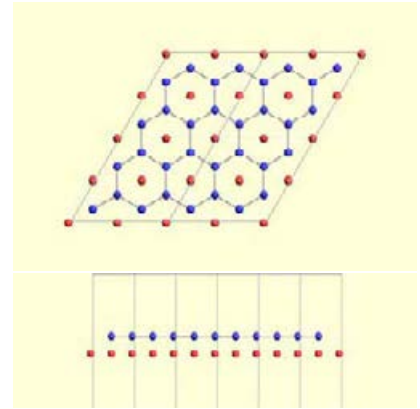

SrAl<sub>2</sub> (P)

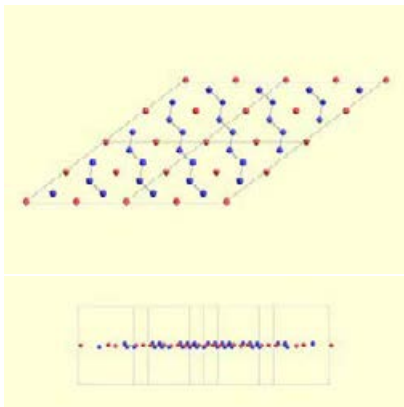

SrSi<sub>2</sub> (T)

×

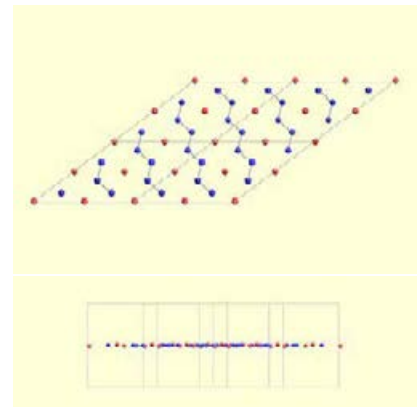

SrSi<sub>2</sub> (P)

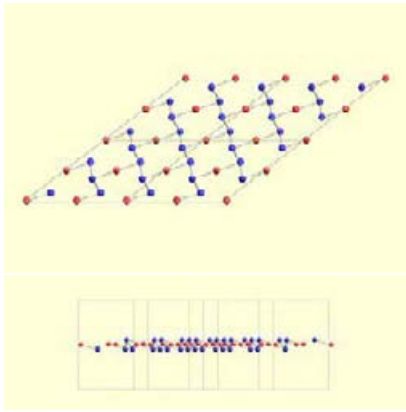

SrP<sub>2</sub> (T)

×

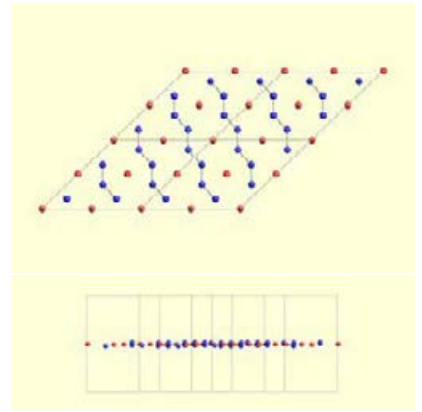

SrP<sub>2</sub> (P)

×

×

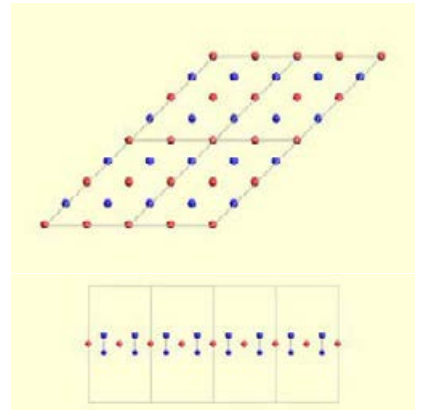

SrS<sub>2</sub> (P)

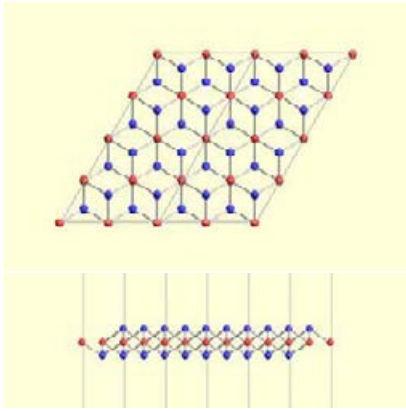

SrCl<sub>2</sub> (T)

×

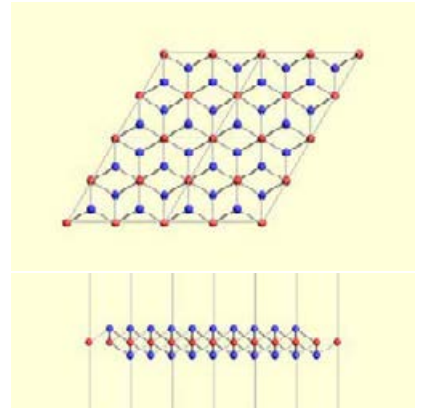

SrCl<sub>2</sub> (P)

×

×

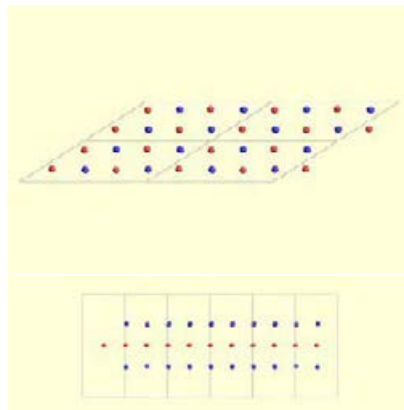

SrK<sub>2</sub> (H)

×

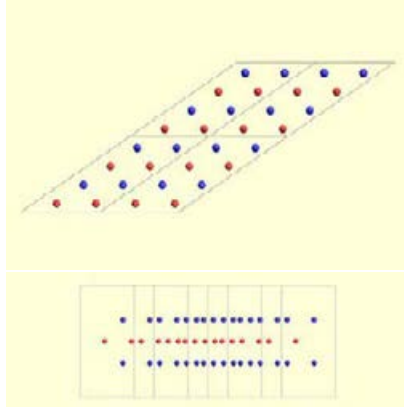

×

×

×

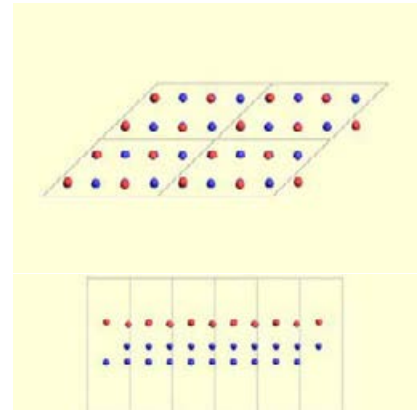

SrSe<sub>2</sub> (P)

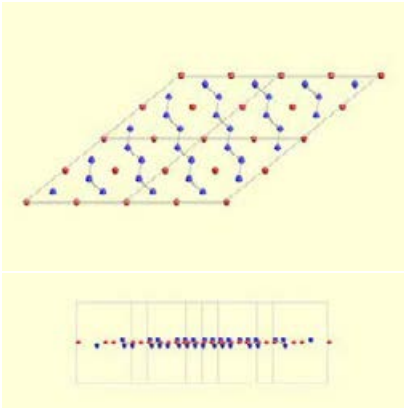

SrGe<sub>2</sub> (T)

×

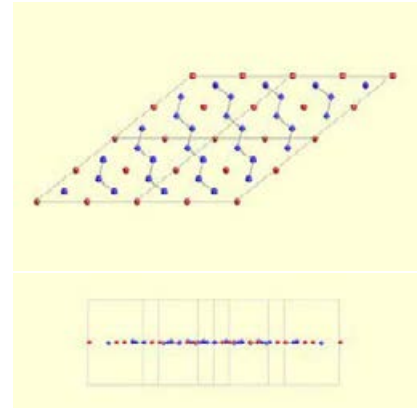

SrGe<sub>2</sub> (P)

×

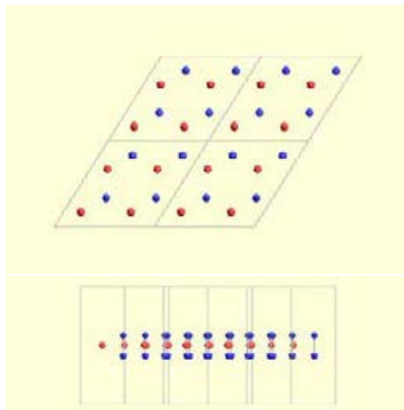

SrSe<sub>2</sub> (H)

×

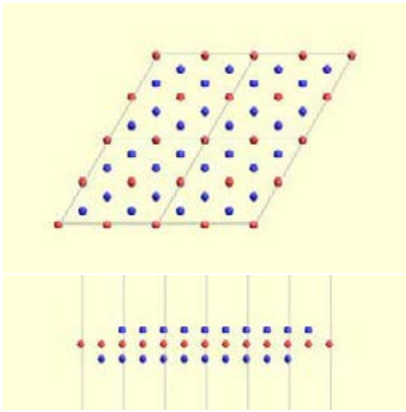

SrBr<sub>2</sub> (T)

×

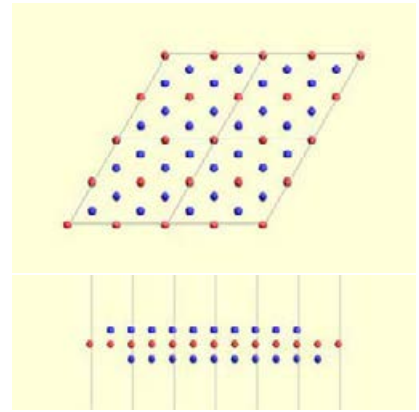

SrBr<sub>2</sub> (P)

×

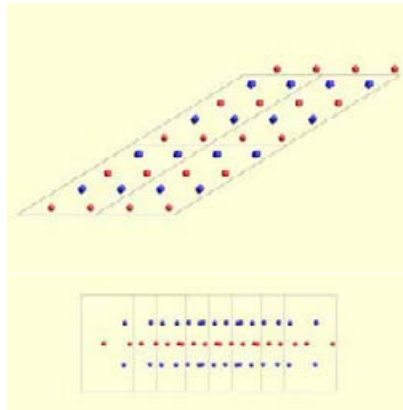

SrSr<sub>2</sub> (H)

×

×

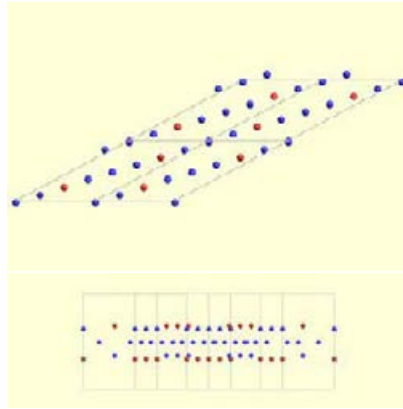

SrY<sub>2</sub> (H)

×

×

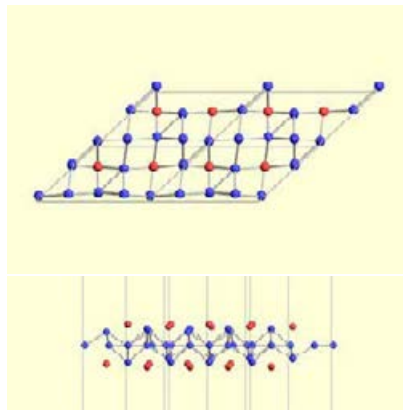

SrPd<sub>2</sub> (H)

×



×

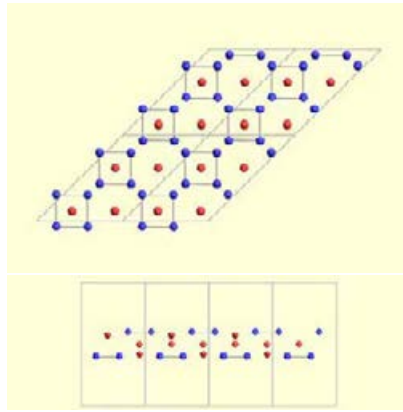

SrAg<sub>2</sub> (H)

×

×

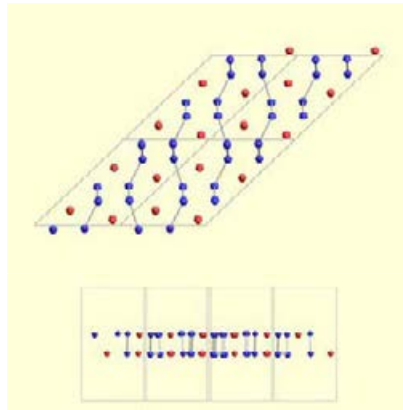

SrCd<sub>2</sub> (H)

×

×

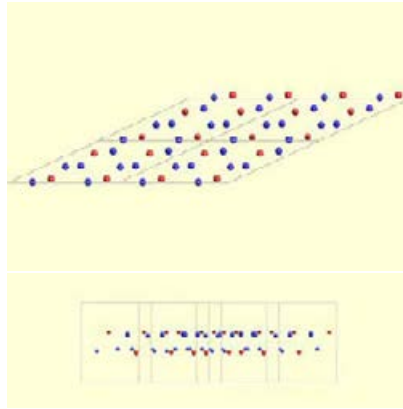

SrIn<sub>2</sub> (H)

×

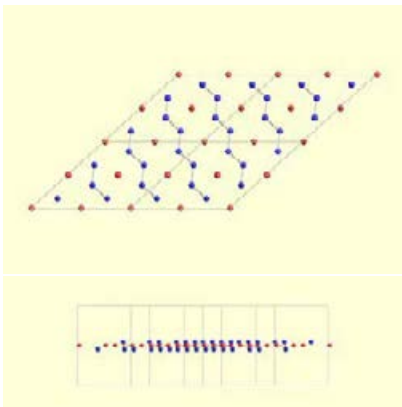

SrSn<sub>2</sub> (T)

×

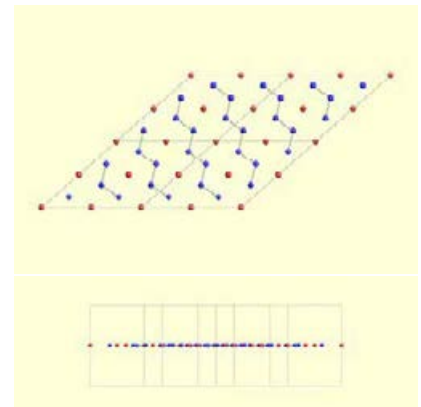

SrSn<sub>2</sub> (P)

×

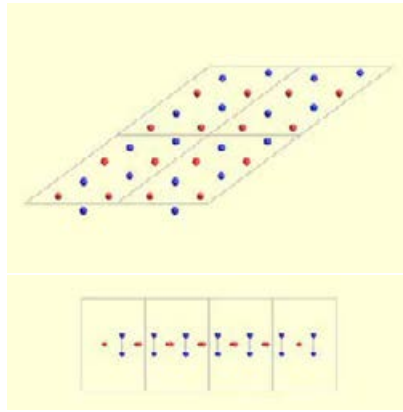

×

SrSb<sub>2</sub> (H)

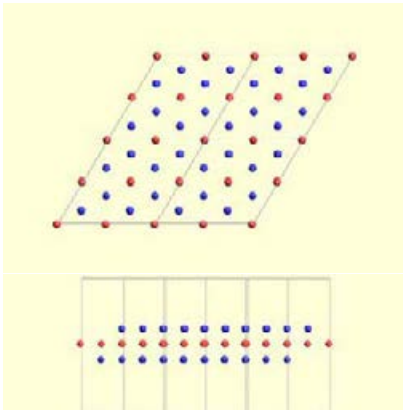

SrI<sub>2</sub> (T)

×

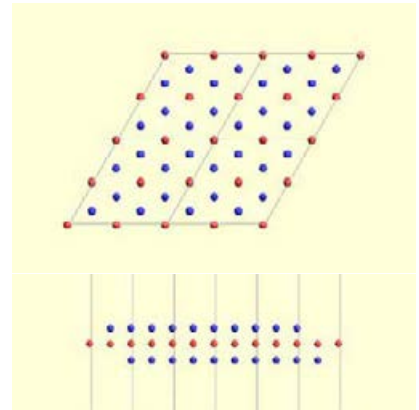

SrI<sub>2</sub> (P)

×

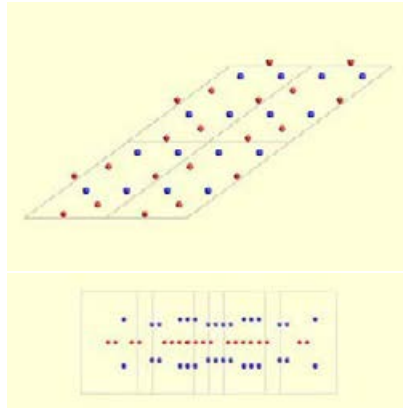

SrCs<sub>2</sub> (H)

×

×

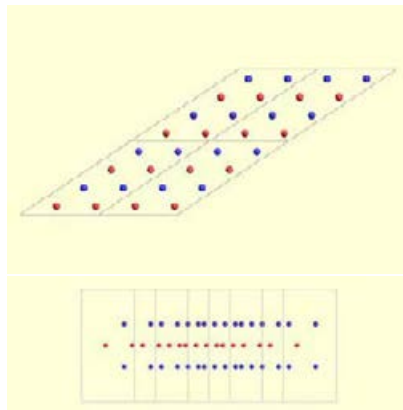

SrBa<sub>2</sub> (H)

×

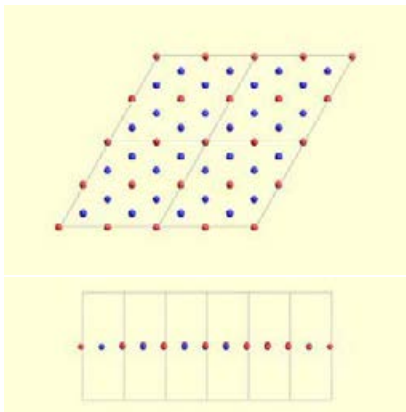

SrAu<sub>2</sub> (T)

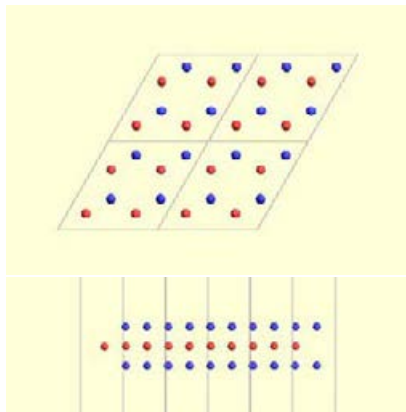

SrAu<sub>2</sub> (H)

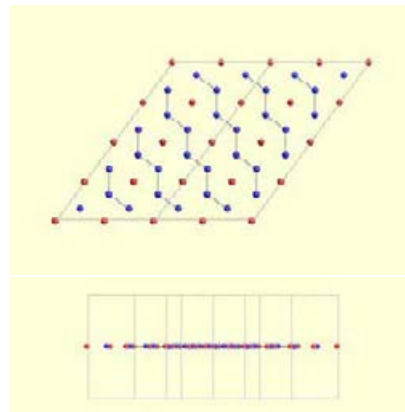

SrAu<sub>2</sub> (P)

×

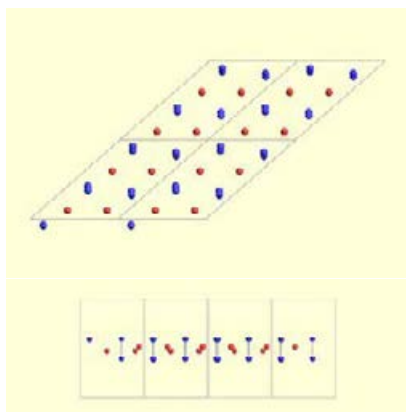

SrHg<sub>2</sub> (H)

×

×

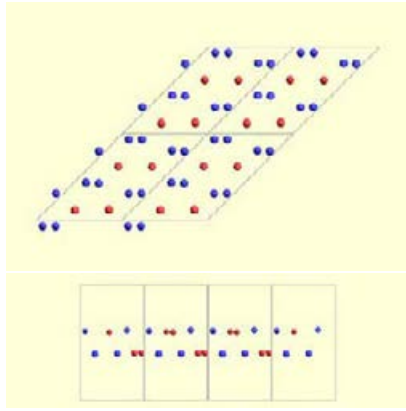

SrTl<sub>2</sub> (H)

×

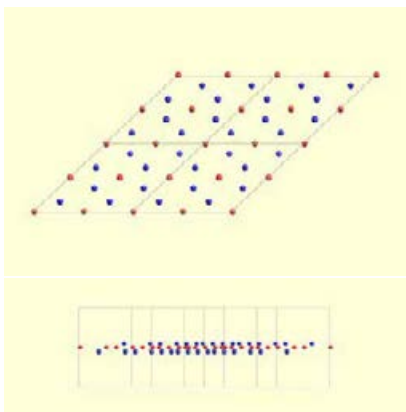

SrPb<sub>2</sub> (T)

×

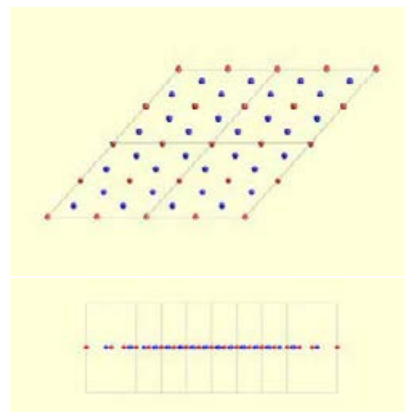

SrPb<sub>2</sub> (P)

×

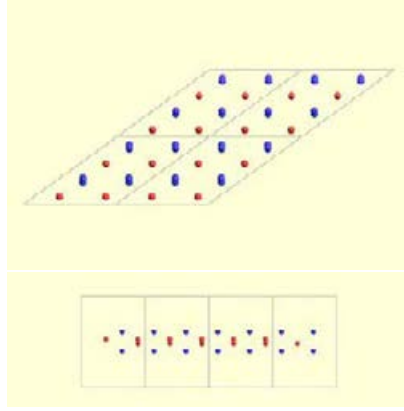

SrBi<sub>2</sub> (H)

×

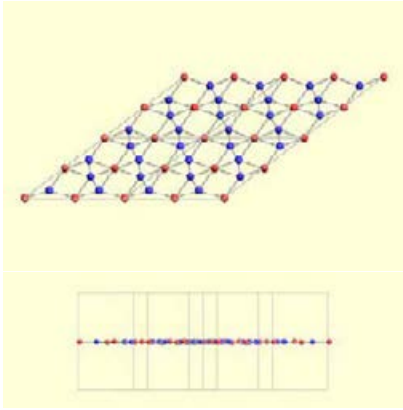

YB<sub>2</sub> (T)

×

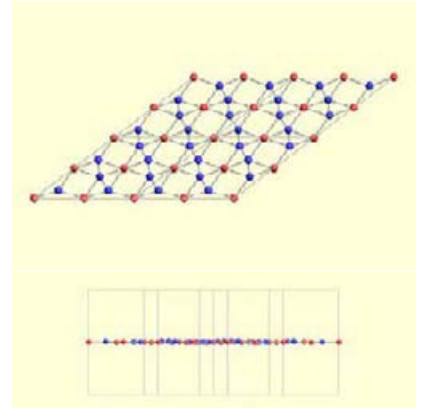

YB<sub>2</sub> (P)

×

×

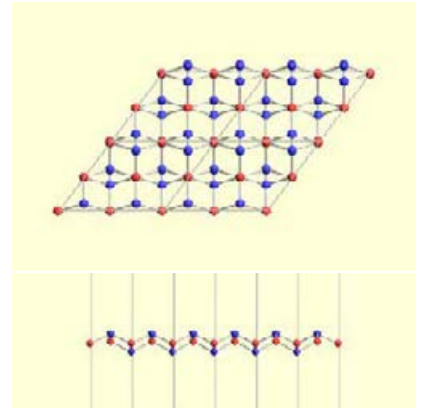

YC<sub>2</sub> (P)

×

×

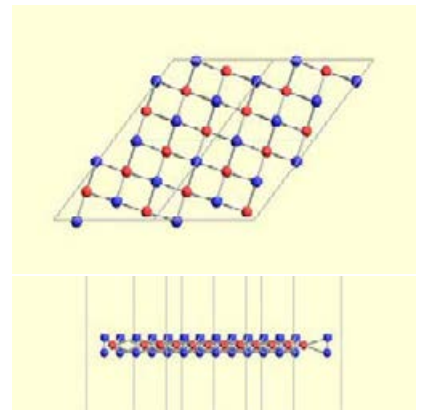

YN<sub>2</sub> (P)

×

×

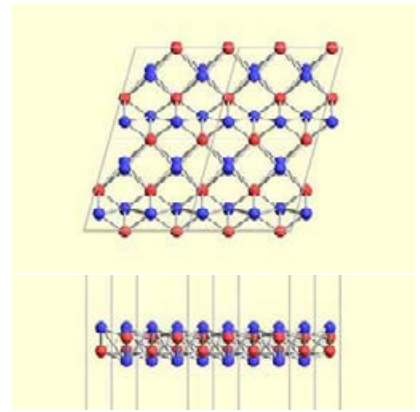

×

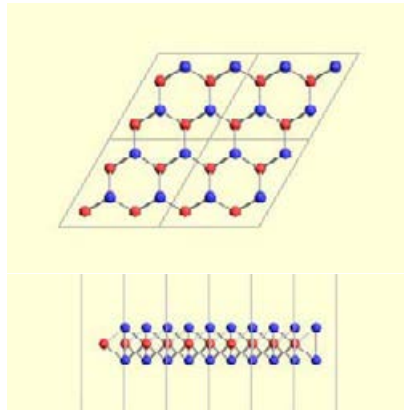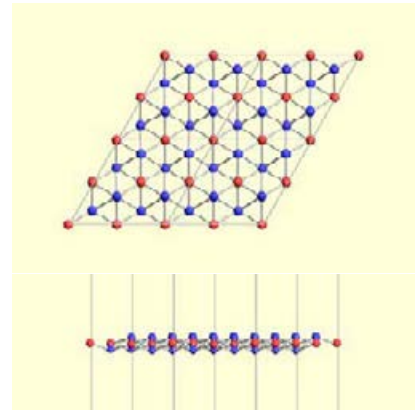

×

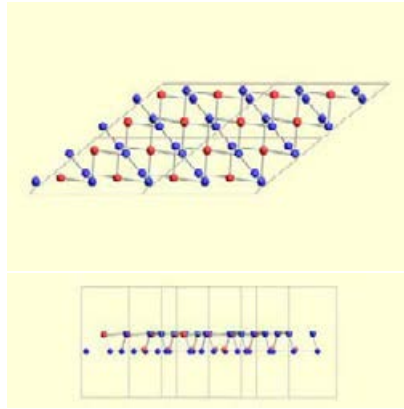

×

×

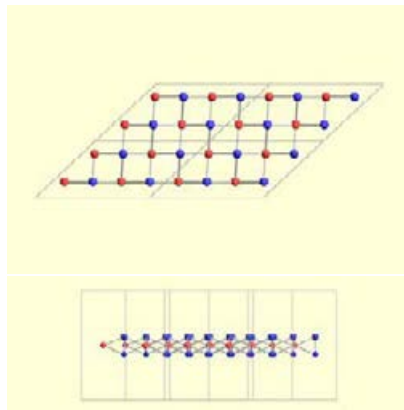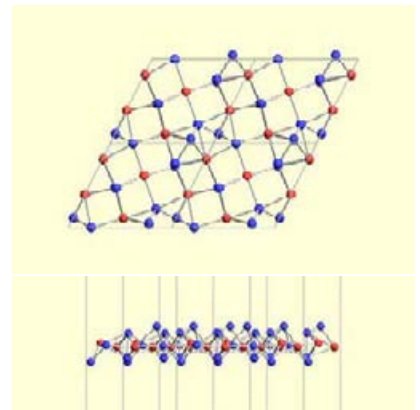



×

×

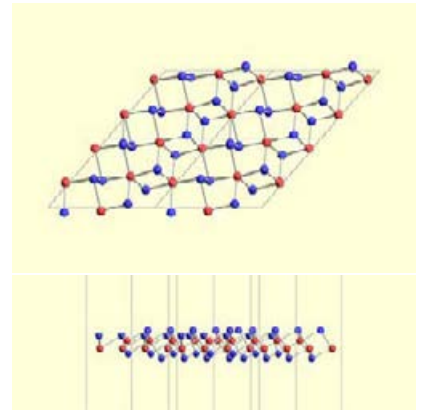

×

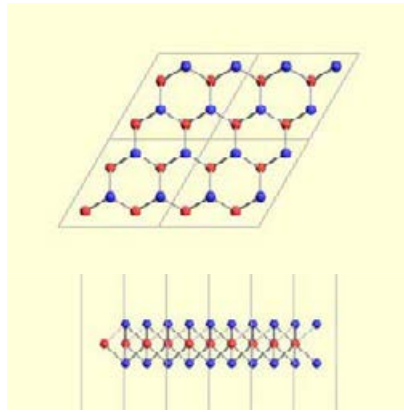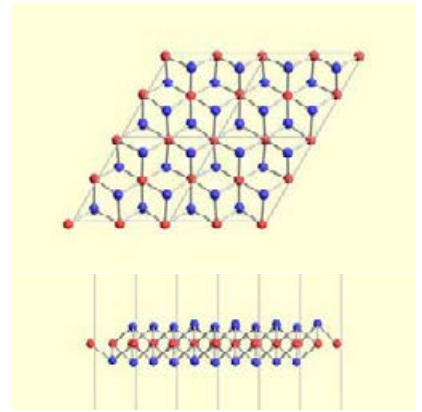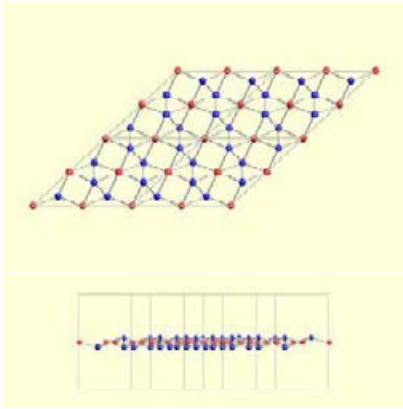

×

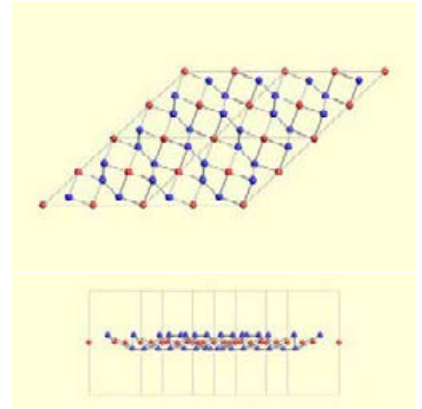

×

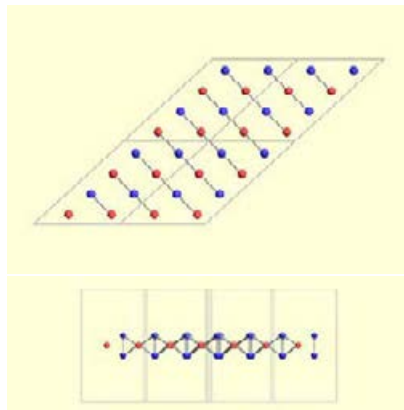

×

×

×

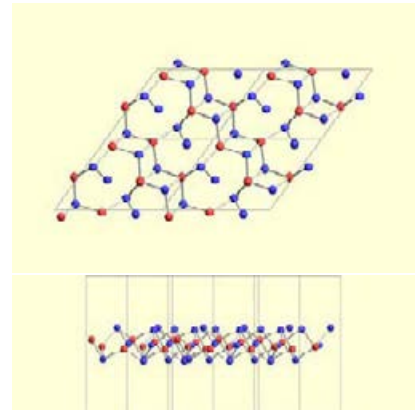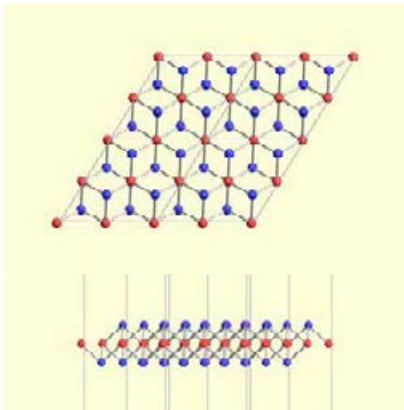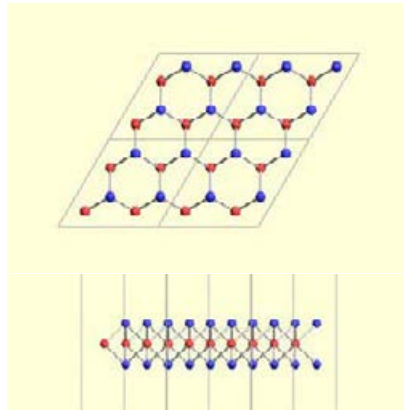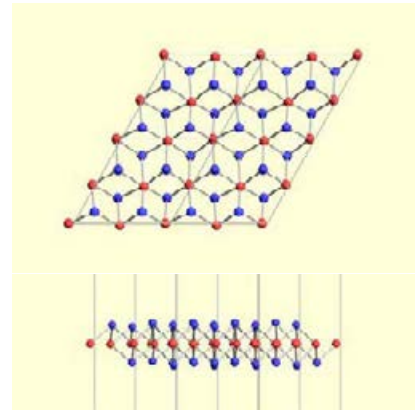

×

×

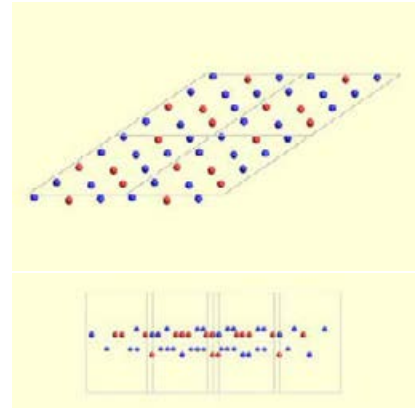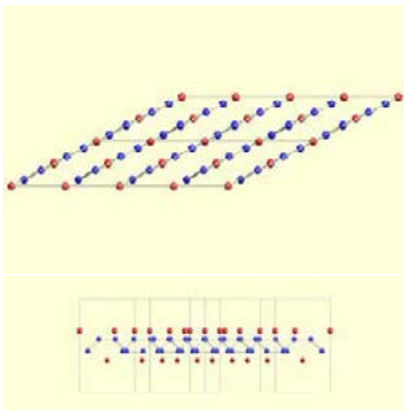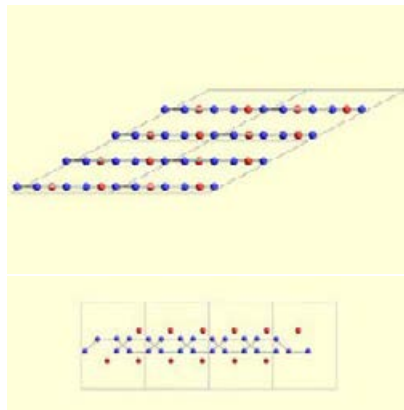

×

×

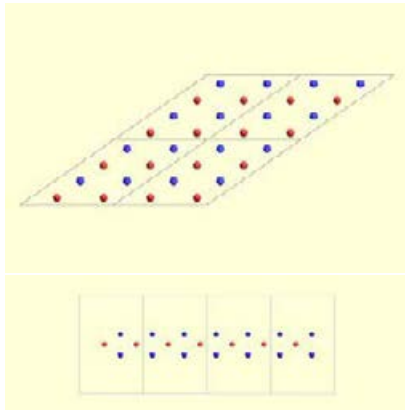

$\text{YSn}_2$  (H)

×

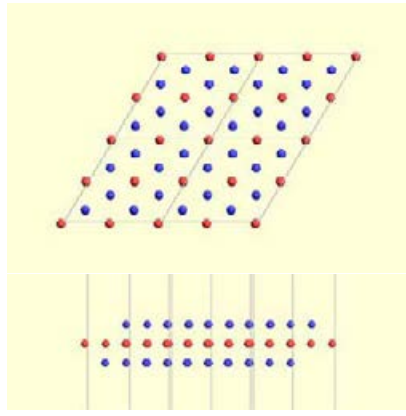

$\text{YI}_2$  (T)

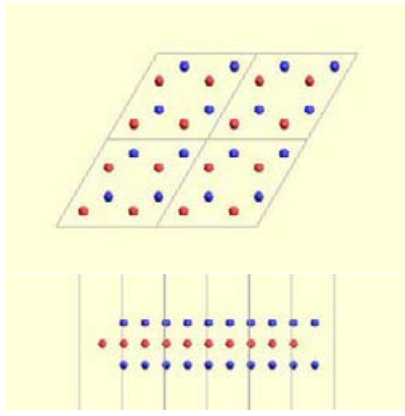

$\text{YI}_2$  (H)

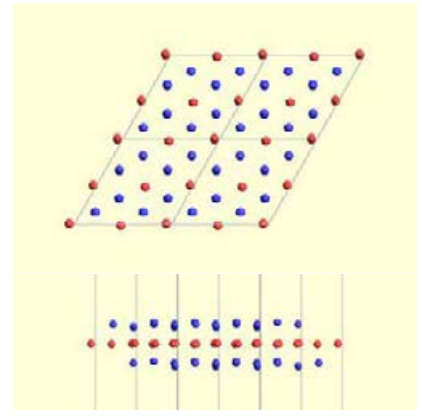

$\text{YI}_2$  (P)

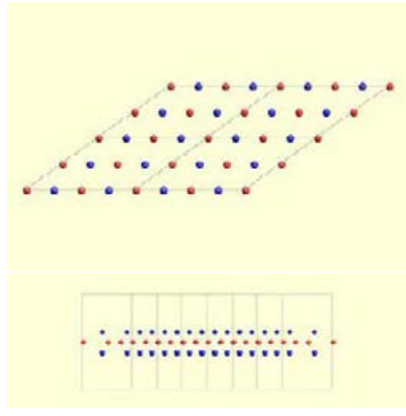

$\text{YPb}_2$  (T)

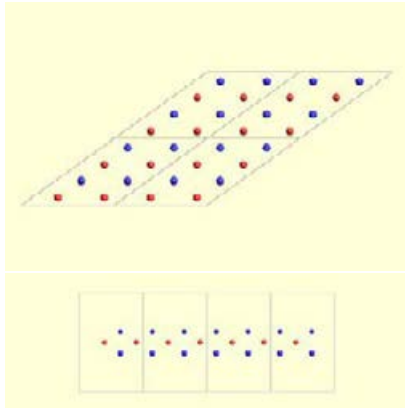

$\text{YPb}_2$  (H)

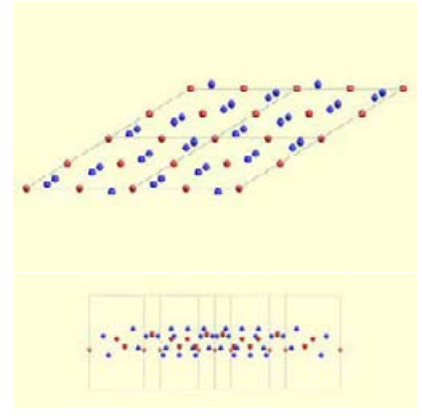

$\text{YPb}_2$  (P)

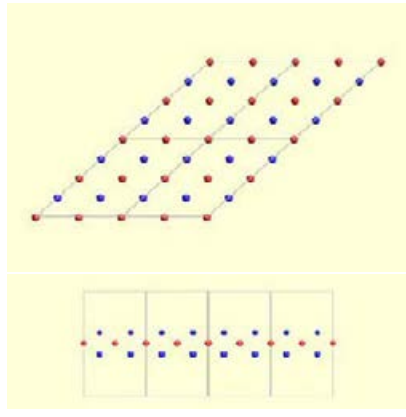

$\text{YBi}_2$  (T)

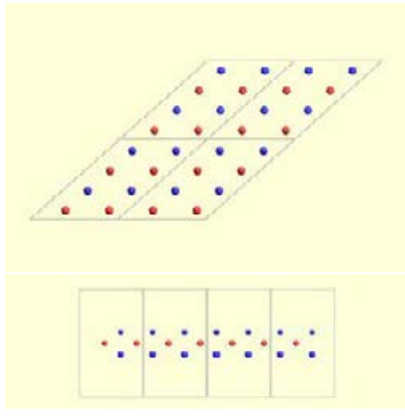

$\text{YBi}_2$  (H)

×

×

×

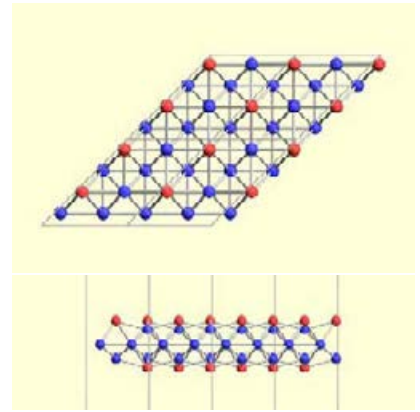

ZrBe<sub>2</sub> (P)

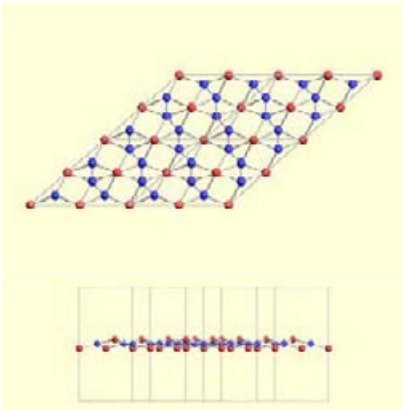

ZrB<sub>2</sub> (T)

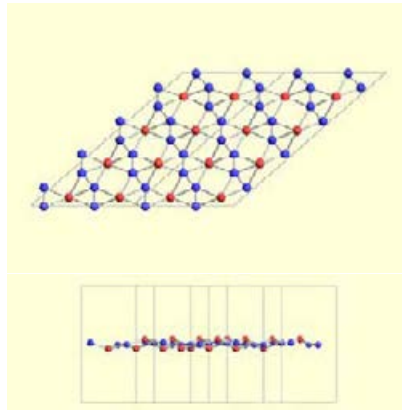

ZrB<sub>2</sub> (H)

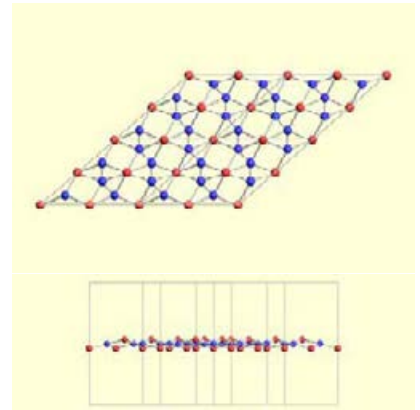

ZrB<sub>2</sub> (P)

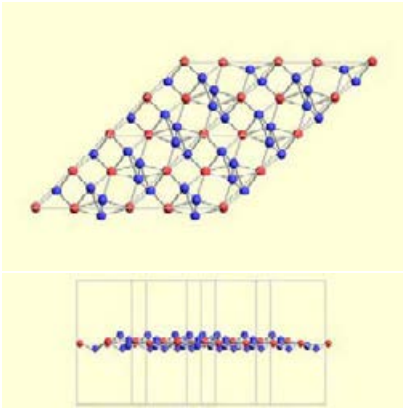

ZrC<sub>2</sub> (T)

×

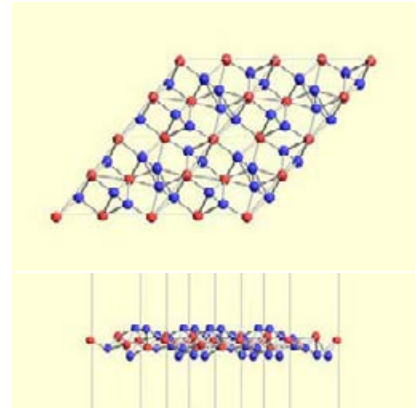

ZrC<sub>2</sub> (P)

×

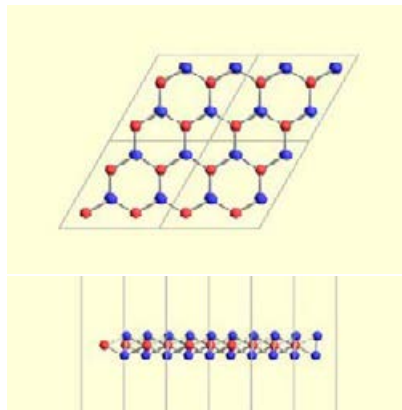

ZrN<sub>2</sub> (H)

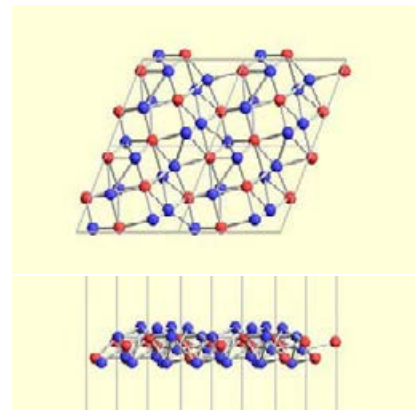

ZrN<sub>2</sub> (P)

×

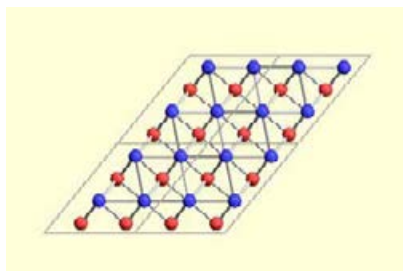

×

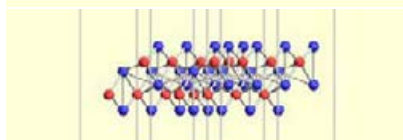

ZrO<sub>2</sub> (H)

×

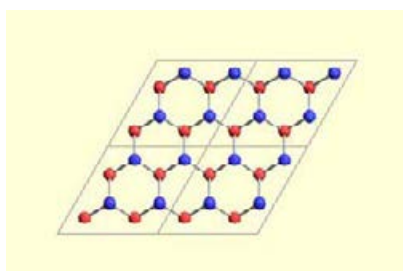

×

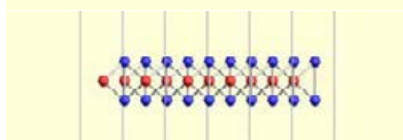

ZrF<sub>2</sub> (H)

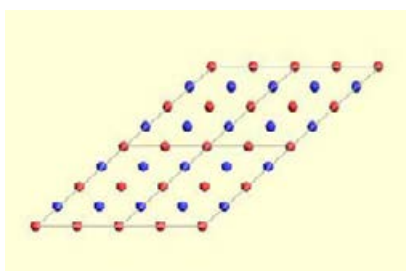

×

×

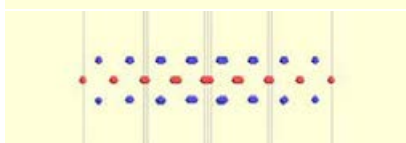

ZrMg<sub>2</sub> (T)

×

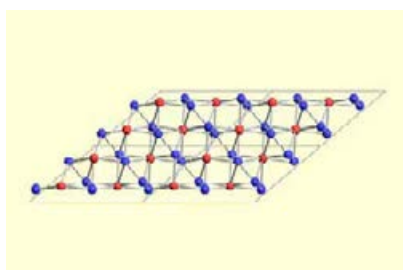

×

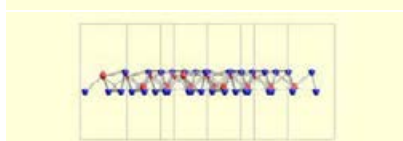

ZrSi<sub>2</sub> (H)



×

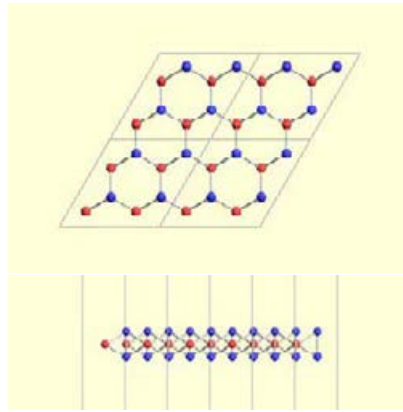

×

ZrP<sub>2</sub> (H)

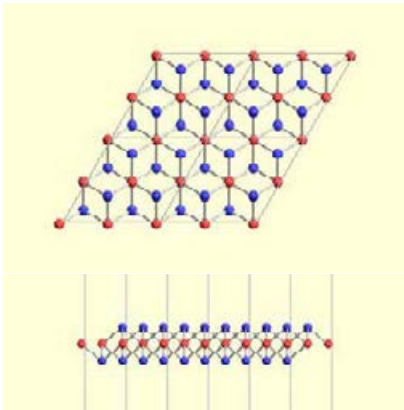

ZrS<sub>2</sub> (T)

×

×

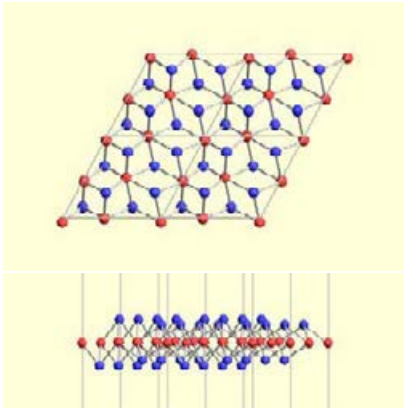

ZrCl<sub>2</sub> (T)

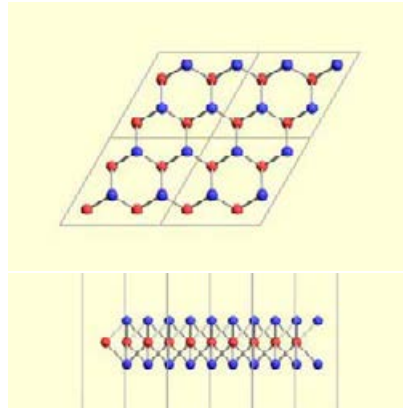

ZrCl<sub>2</sub> (H)

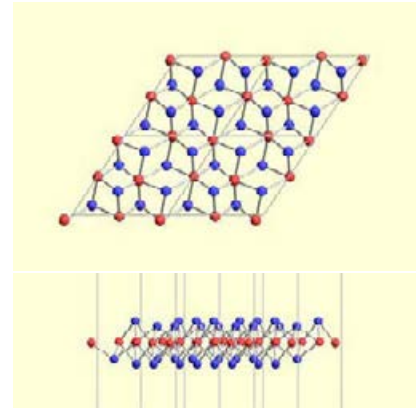

ZrCl<sub>2</sub> (P)

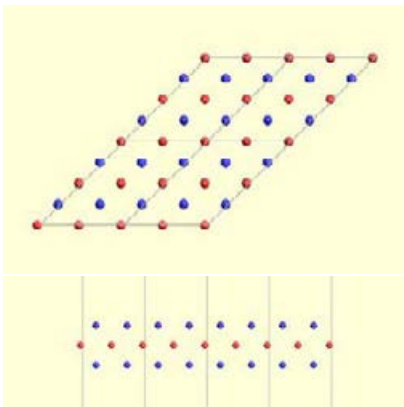

ZrCa<sub>2</sub> (T)

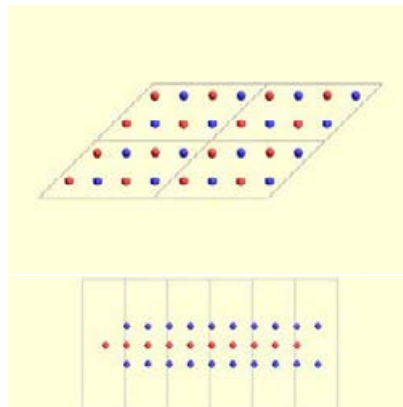

ZrCa<sub>2</sub> (H)

×

×

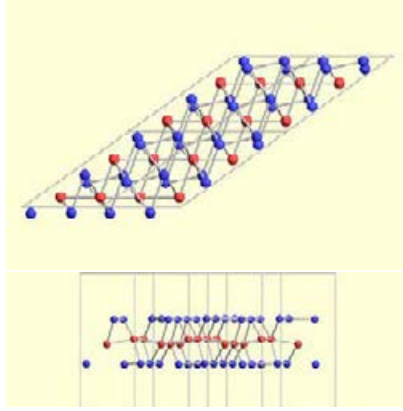

$ZrTi_2$  (H)

×

×

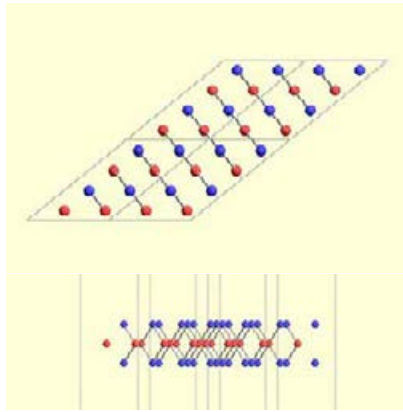

$ZrCr_2$  (H)

×

×

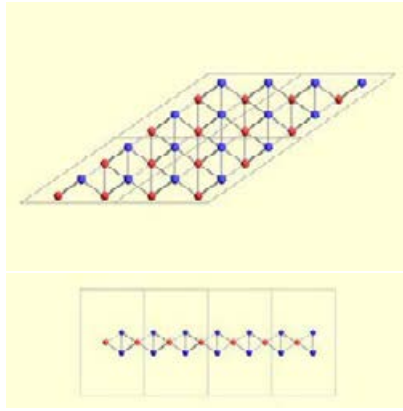

$ZrGe_2$  (H)

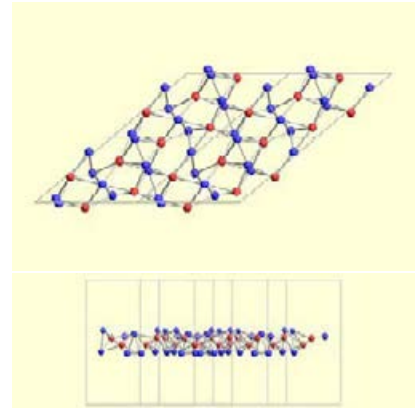

$ZrGe_2$  (P)

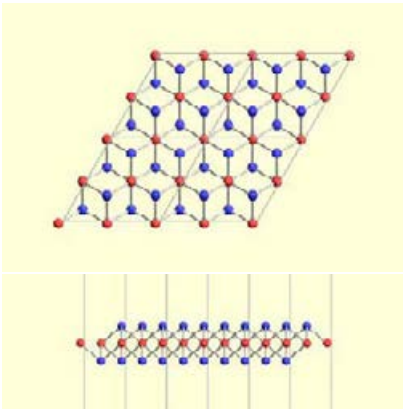

$ZrSe_2$  (T)

×

×

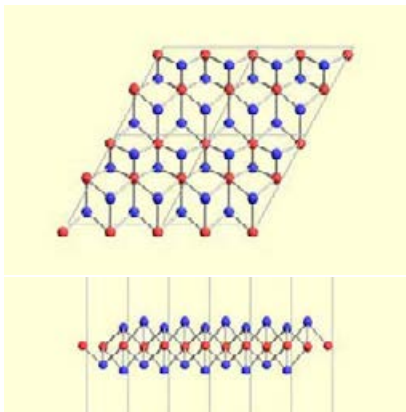

ZrBr<sub>2</sub> (T)

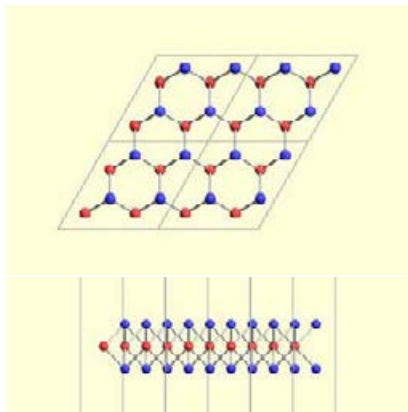

ZrBr<sub>2</sub> (H)

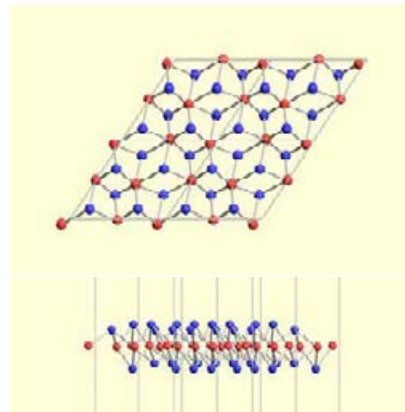

ZrBr<sub>2</sub> (P)

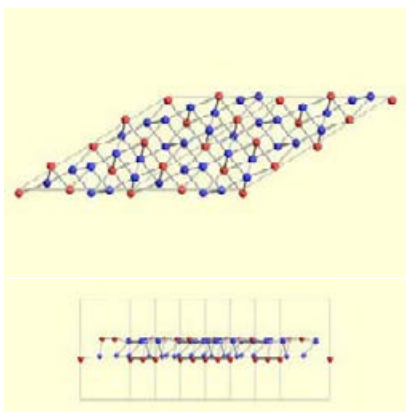

ZrNb<sub>2</sub> (T)

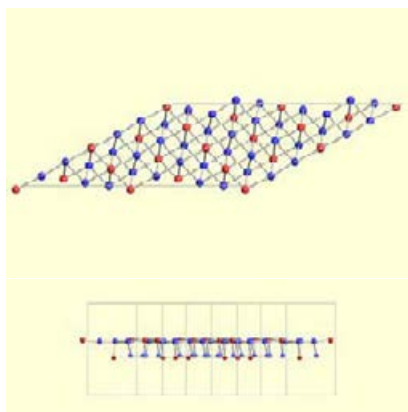

ZrNb<sub>2</sub> (H)

×

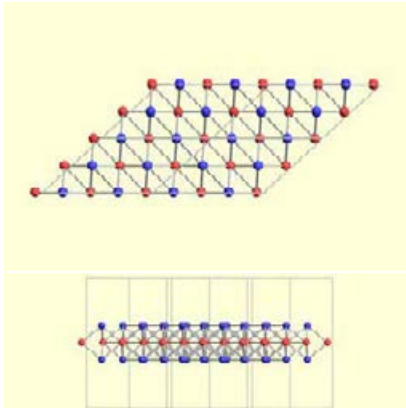

ZrPd<sub>2</sub> (T)

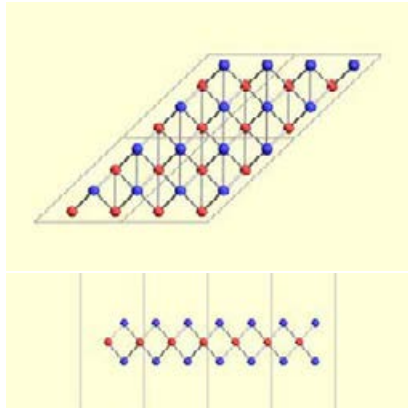

ZrPd<sub>2</sub> (H)

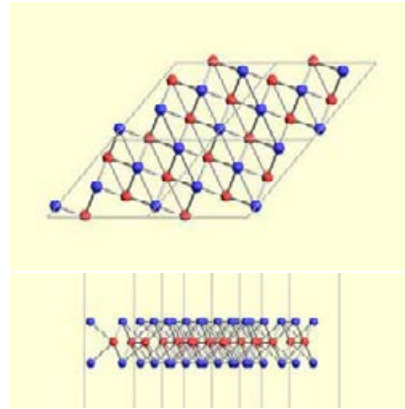

ZrPd<sub>2</sub> (P)

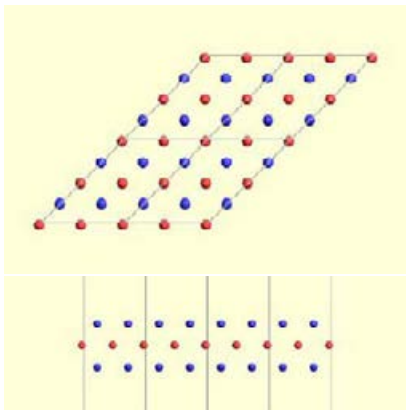

ZrIn<sub>2</sub> (T)

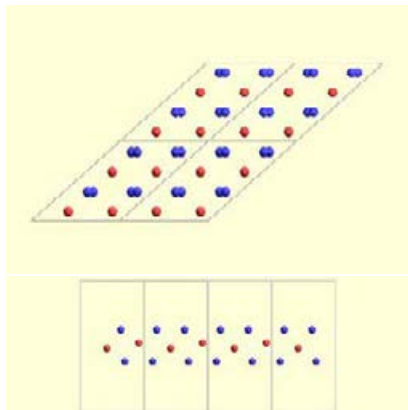

ZrIn<sub>2</sub> (H)

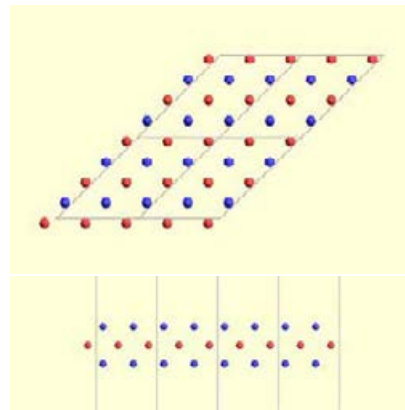

ZrIn<sub>2</sub> (P)

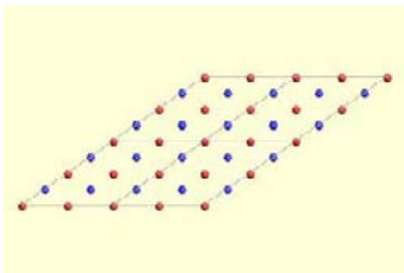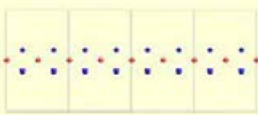

ZrSn<sub>2</sub> (T)

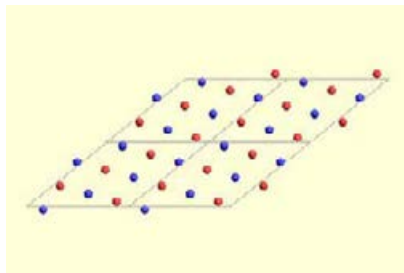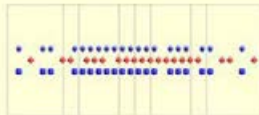

ZrSn<sub>2</sub> (H)

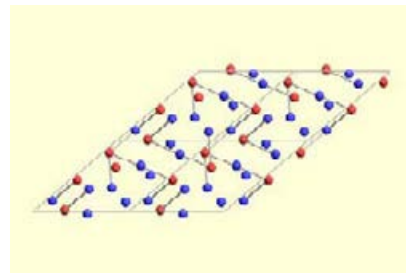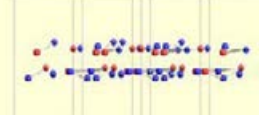

ZrSn<sub>2</sub> (P)

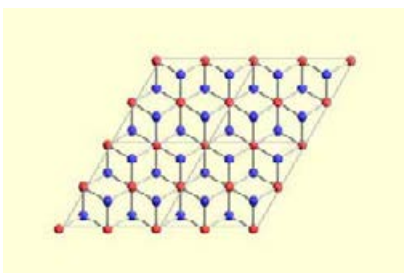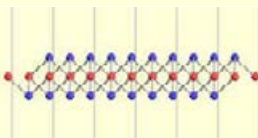

ZrTe<sub>2</sub> (T)

×

×

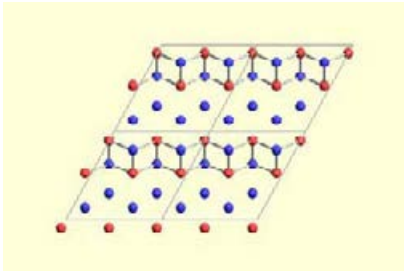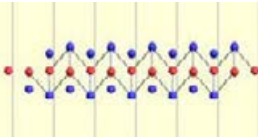

ZrI<sub>2</sub> (T)

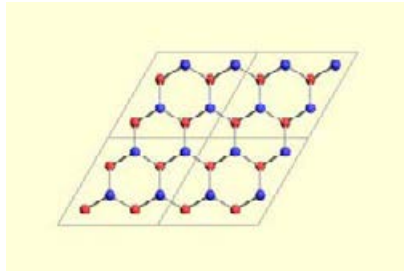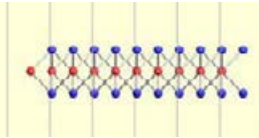

ZrI<sub>2</sub> (H)

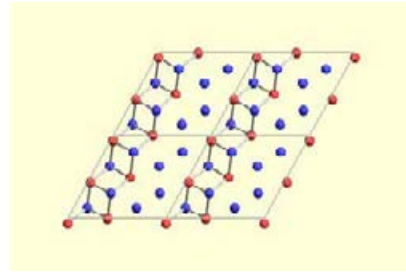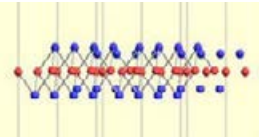

ZrI<sub>2</sub> (P)

×

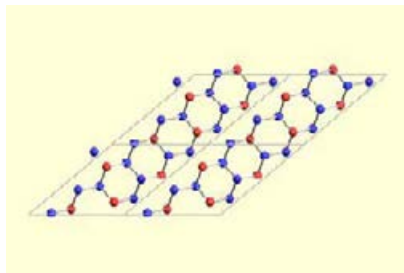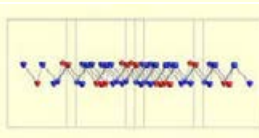

ZrHf<sub>2</sub> (H)

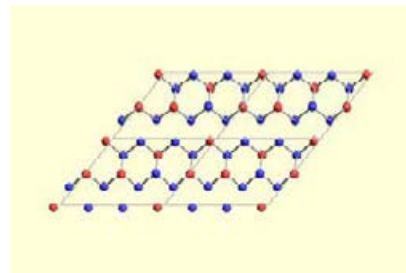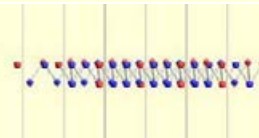

ZrHf<sub>2</sub> (P)

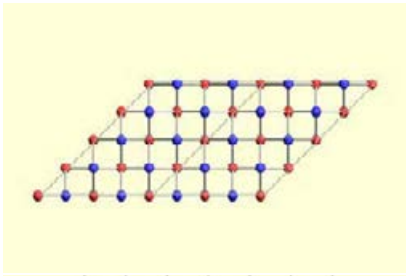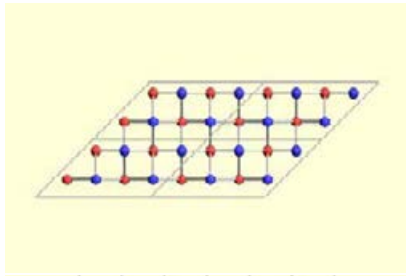

×

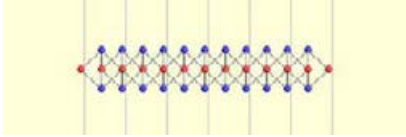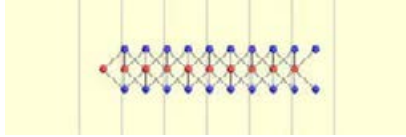

ZrAu<sub>2</sub> (T)

ZrAu<sub>2</sub> (H)

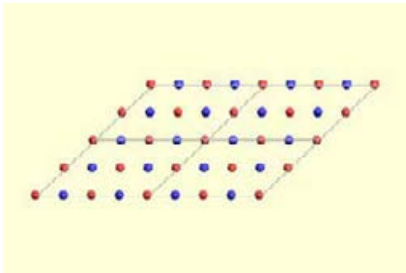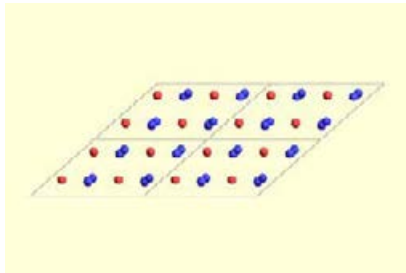

×

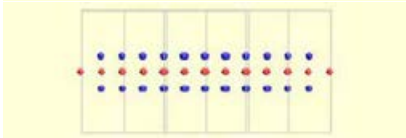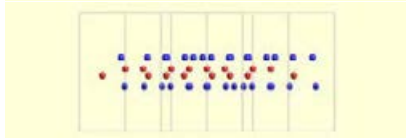

ZrTl<sub>2</sub> (T)

ZrTl<sub>2</sub> (H)

×

×

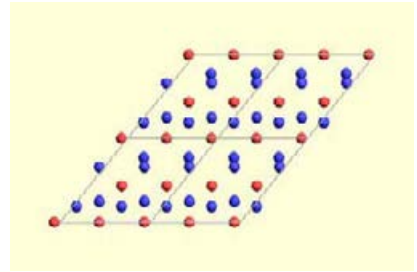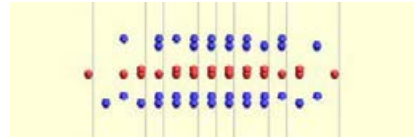

ZrPb<sub>2</sub> (P)

×

×

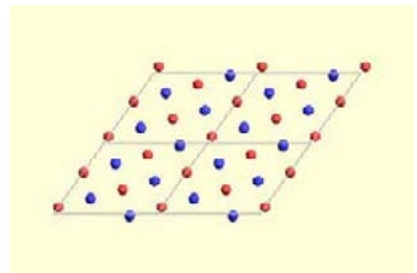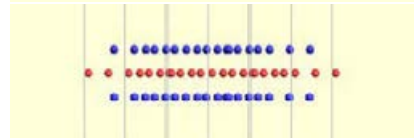

ZrBi<sub>2</sub> (P)



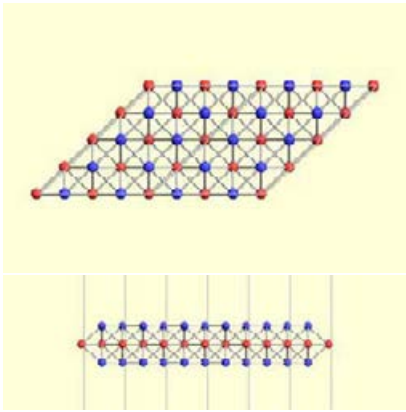

NbBe<sub>2</sub> (T)

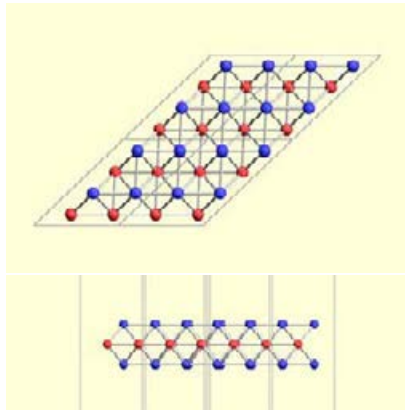

NbBe<sub>2</sub> (H)

×

×

×

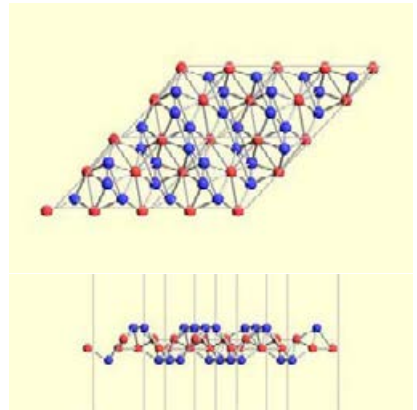

NbC<sub>2</sub> (P)

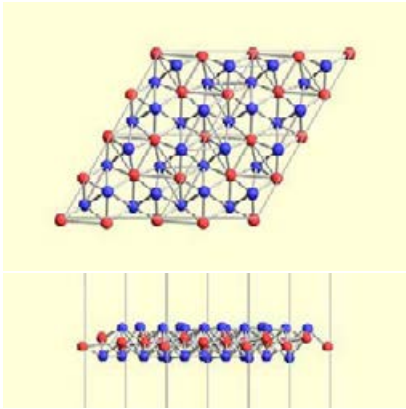

NbO<sub>2</sub> (T)

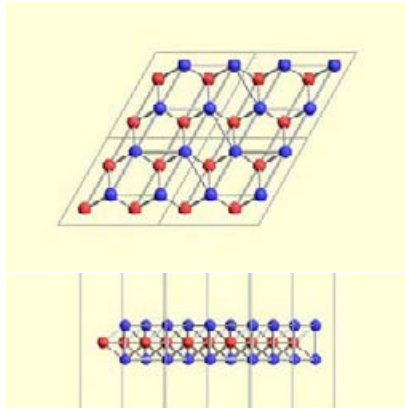

NbO<sub>2</sub> (H)

×

×

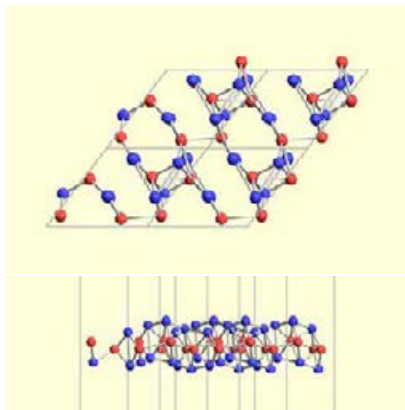

NbF<sub>2</sub> (H)

×

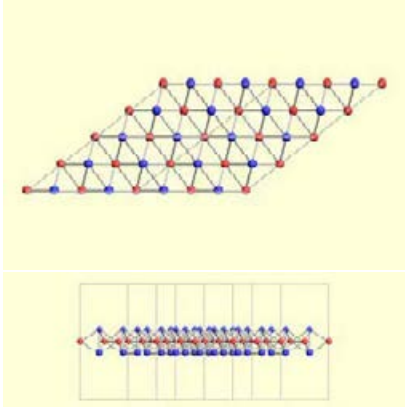

NbAl<sub>2</sub> (T)

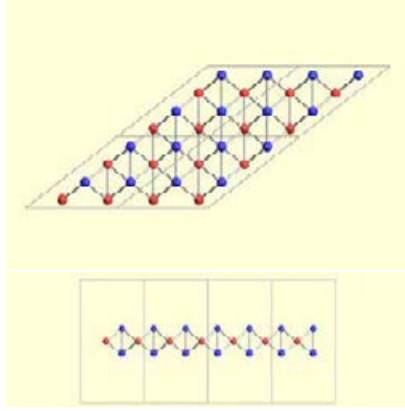

NbAl<sub>2</sub> (H)

×

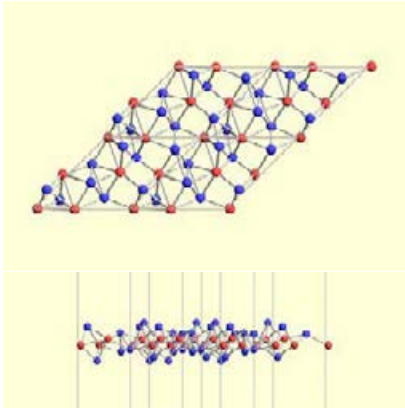

NbP<sub>2</sub> (T)

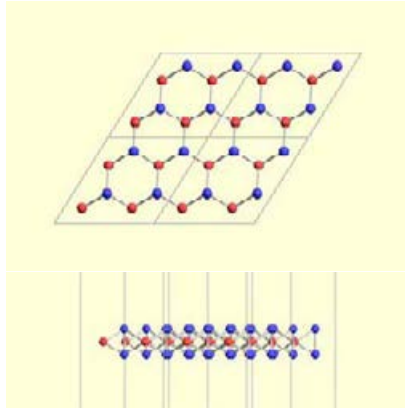

NbP<sub>2</sub> (H)

×

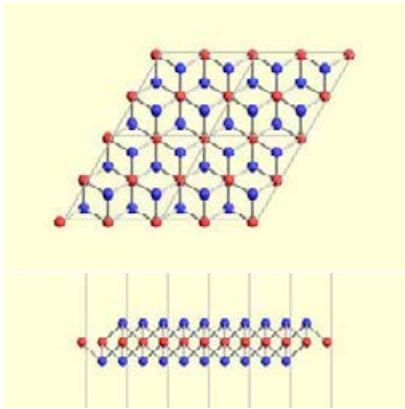

NbS<sub>2</sub> (T)

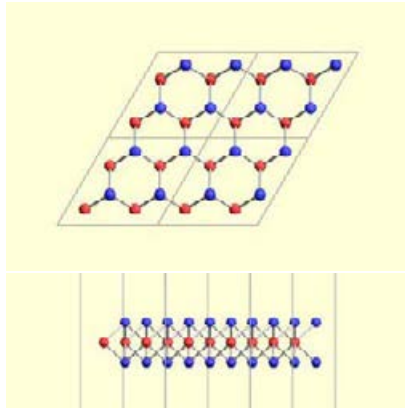

NbS<sub>2</sub> (H)

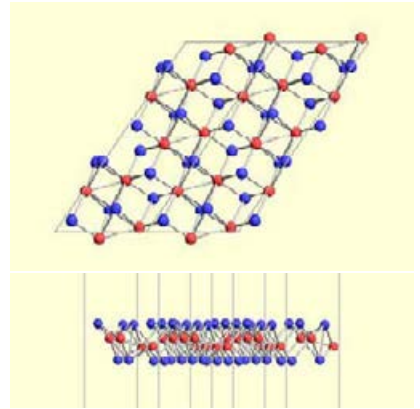

NbS<sub>2</sub> (P)

×

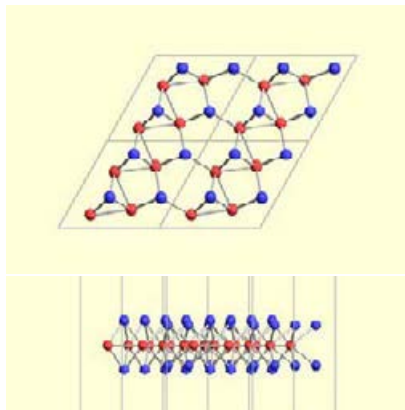

NbCl<sub>2</sub> (H)

×

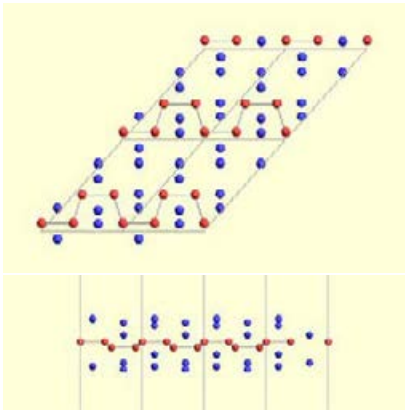

NbCa<sub>2</sub> (T)

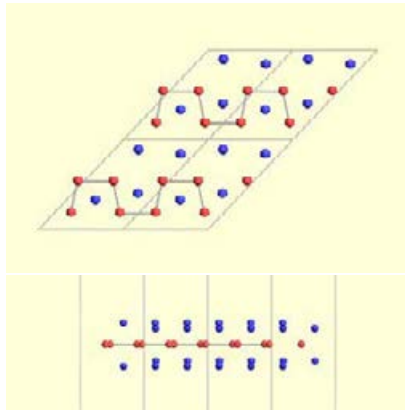

NbCa<sub>2</sub> (H)

×

×

×

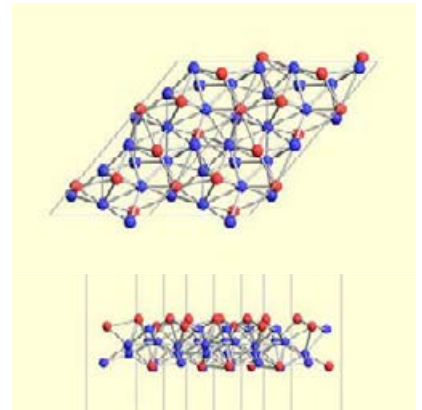

NbV<sub>2</sub> (P)

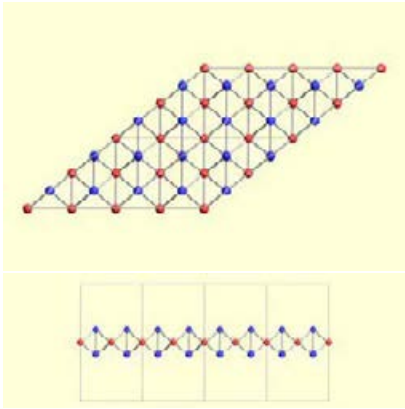

NbGa<sub>2</sub> (T)

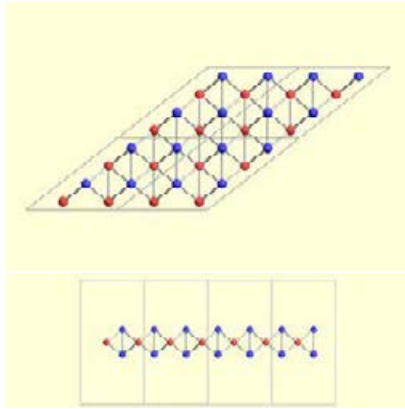

NbGa<sub>2</sub> (H)

×

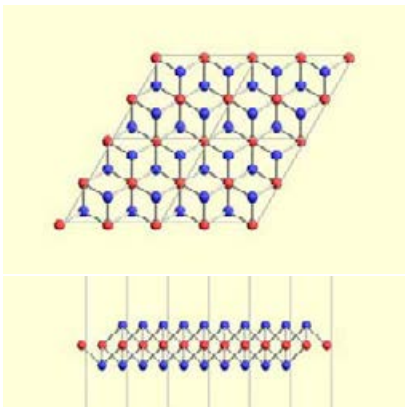

NbSe<sub>2</sub> (T)

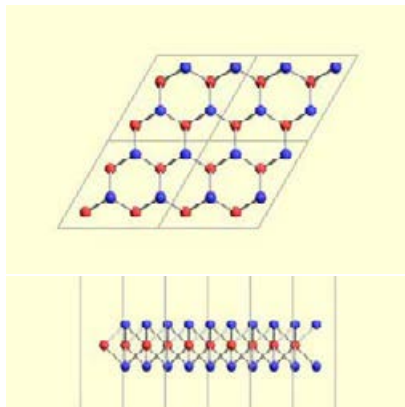

NbSe<sub>2</sub> (H)

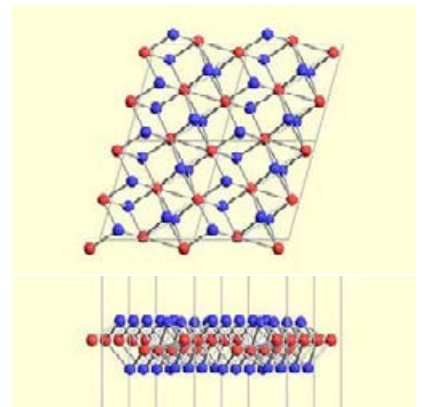

NbSe<sub>2</sub> (P)

×

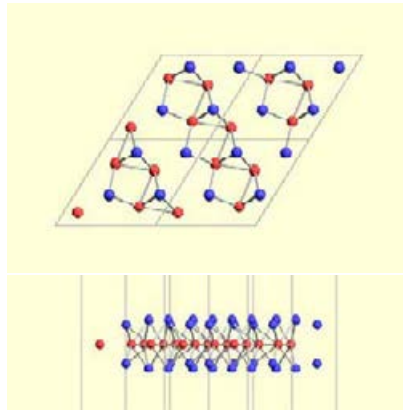

×

NbBr<sub>2</sub> (H)

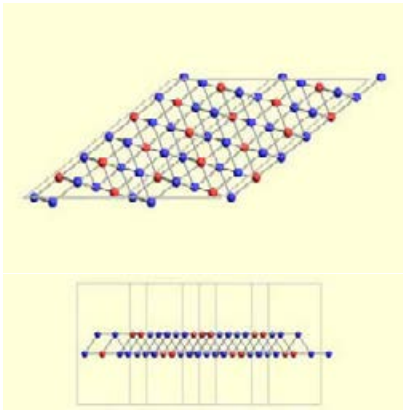

NbNb<sub>2</sub> (T)

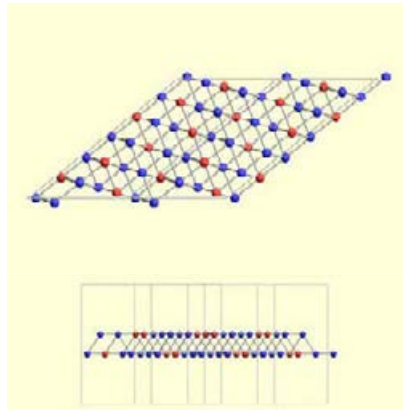

NbNb<sub>2</sub> (H)

×

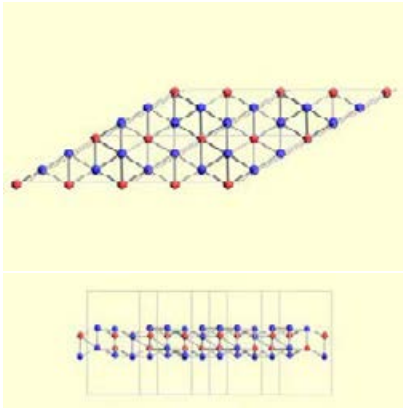

NbRu<sub>2</sub> (T)

×

×

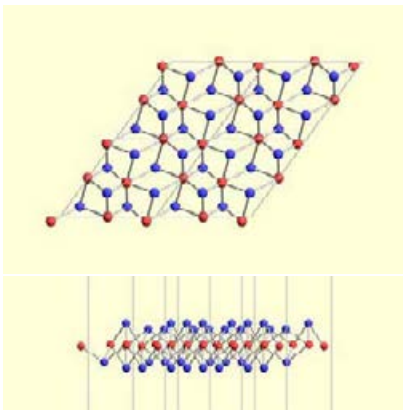

NbTe<sub>2</sub> (T)

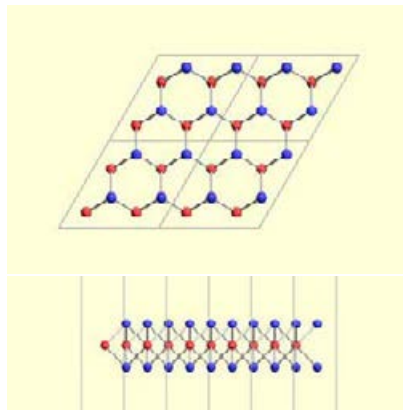

NbTe<sub>2</sub> (H)

×

×

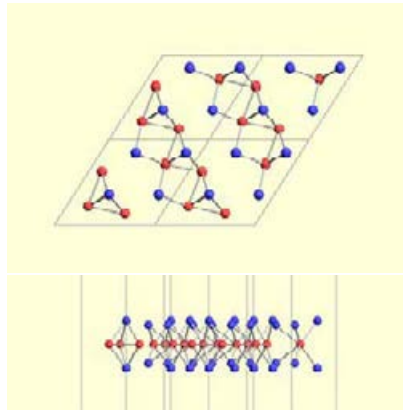

NbI<sub>2</sub> (H)

×

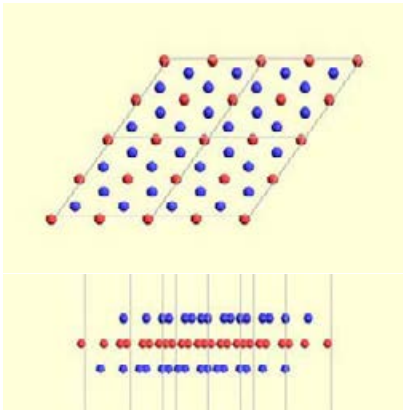

NbBi<sub>2</sub> (T)

×

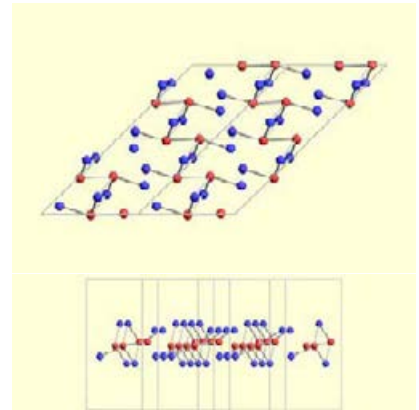

NbBi<sub>2</sub> (P)

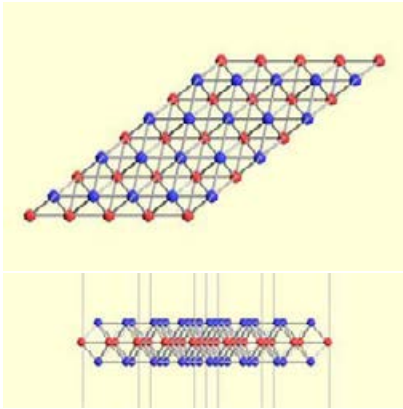

MoBe<sub>2</sub> (T)

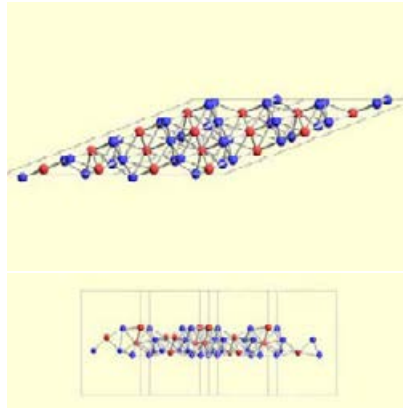

MoBe<sub>2</sub> (H)

×

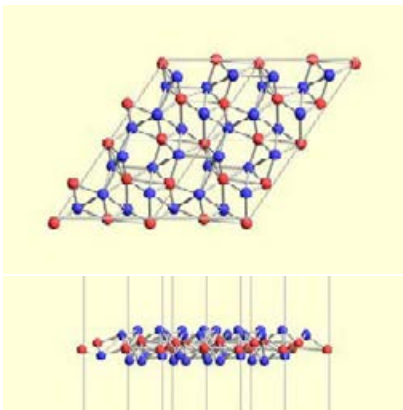

MoN<sub>2</sub> (T)

×

×



×

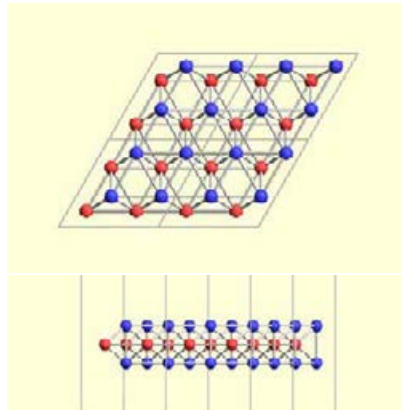

MoO<sub>2</sub> (H)

×

×

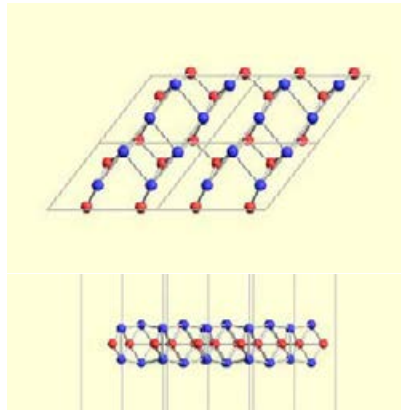

MoF<sub>2</sub> (H)

×

×

×

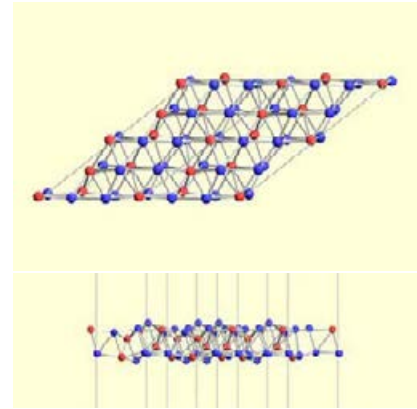

MoSi<sub>2</sub> (P)

×

×

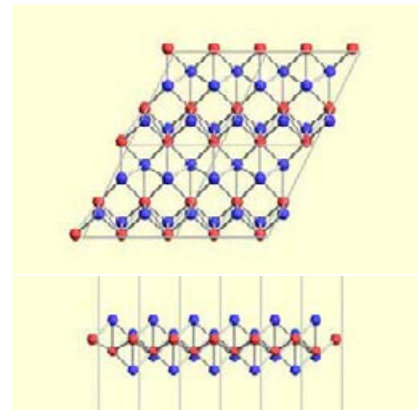

MoP<sub>2</sub> (P)

×

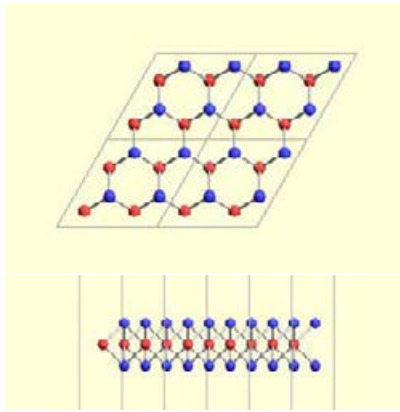

×

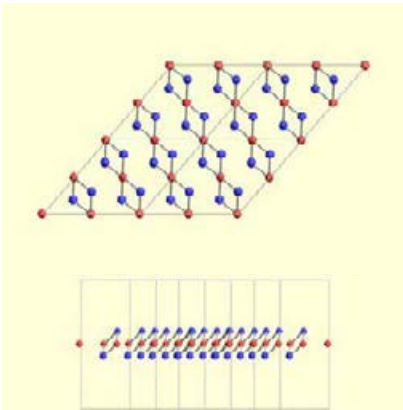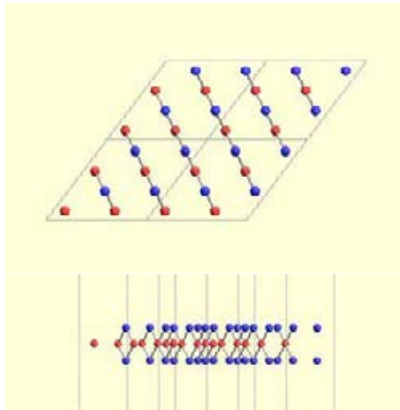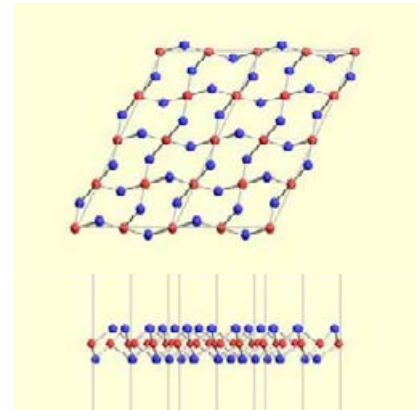

MoCl<sub>2</sub> (T)

MoCl<sub>2</sub> (H)

MoCl<sub>2</sub> (P)

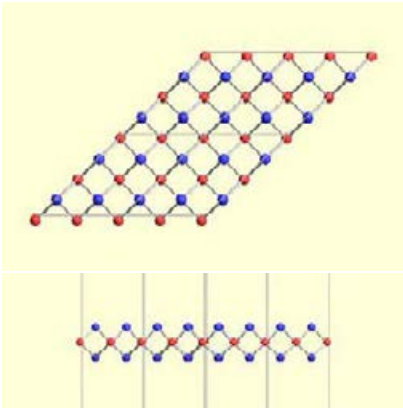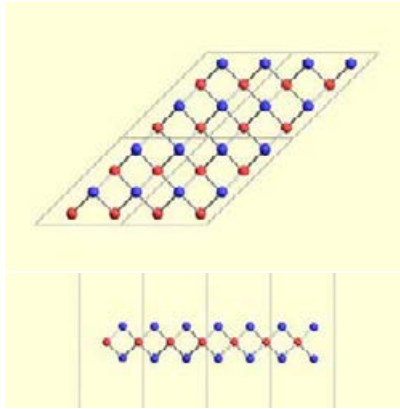

×

MoMn<sub>2</sub> (T)

MoMn<sub>2</sub> (H)

×

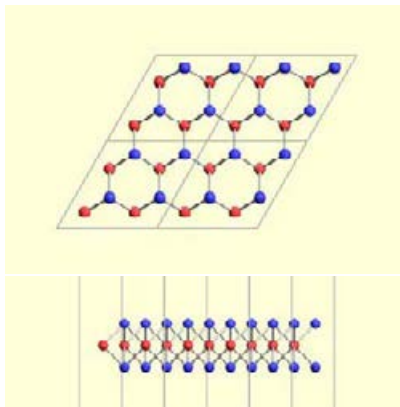

×

MoSe<sub>2</sub> (H)

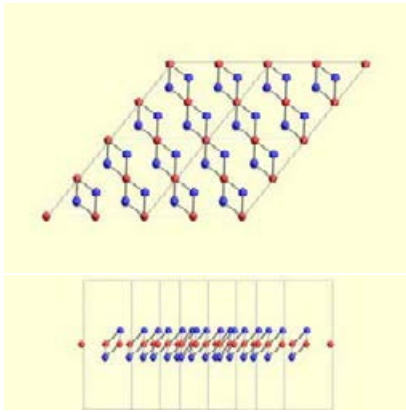

MoBr<sub>2</sub> (T)

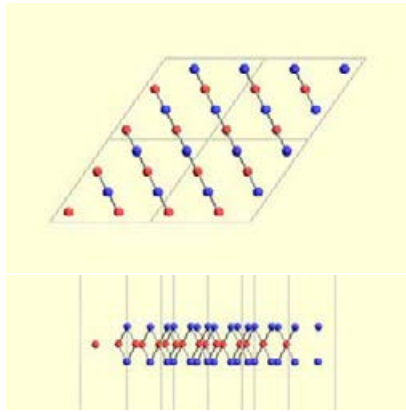

MoBr<sub>2</sub> (H)

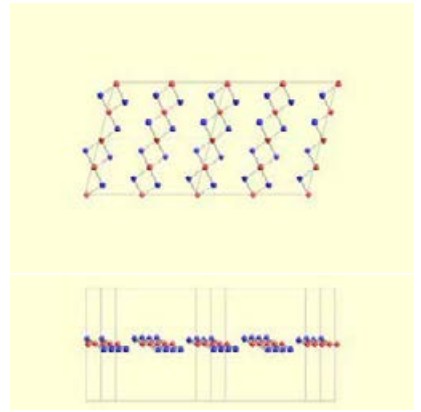

MoBr<sub>2</sub> (P)

×

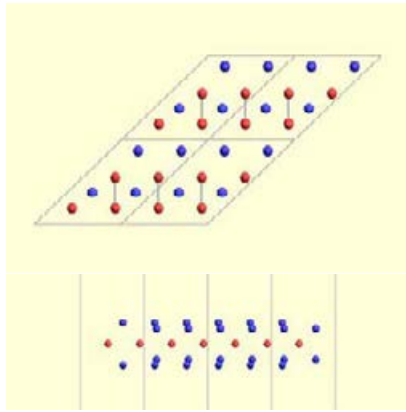

MoY<sub>2</sub> (H)

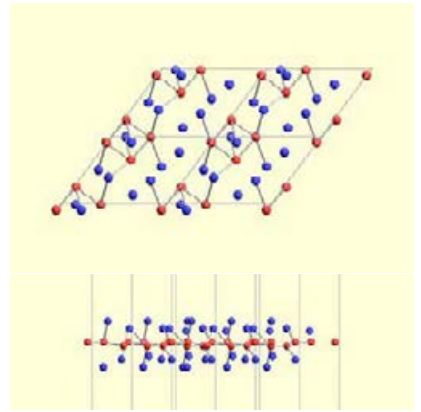

MoY<sub>2</sub> (P)

×

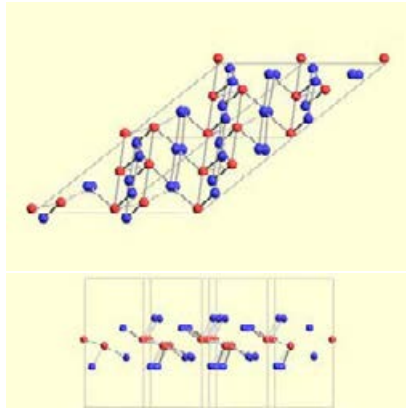

MoIn<sub>2</sub> (H)

×

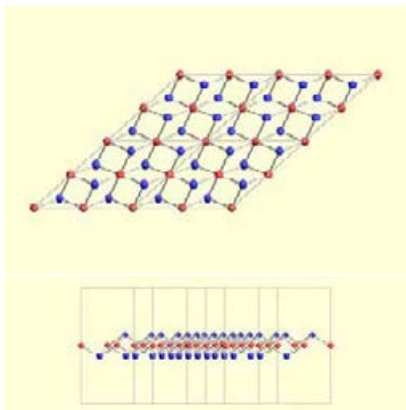

MoSb<sub>2</sub> (T)

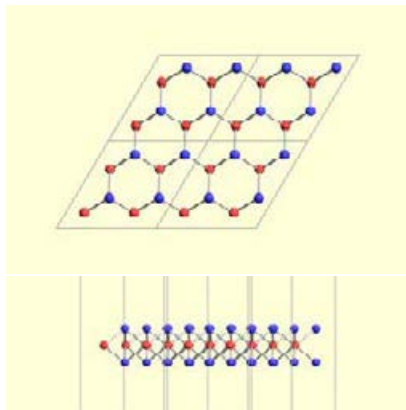

MoSb<sub>2</sub> (H)

×

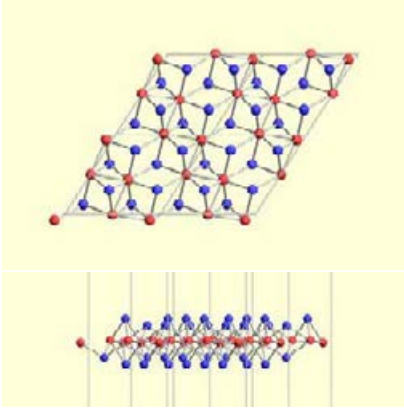

MoTe<sub>2</sub> (T)

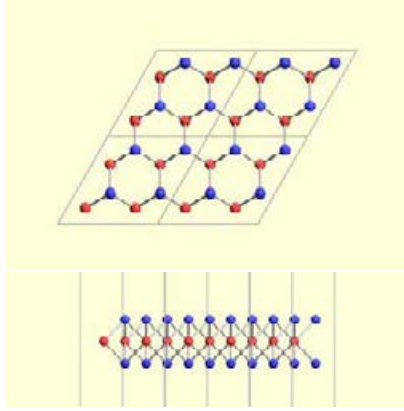

MoTe<sub>2</sub> (H)

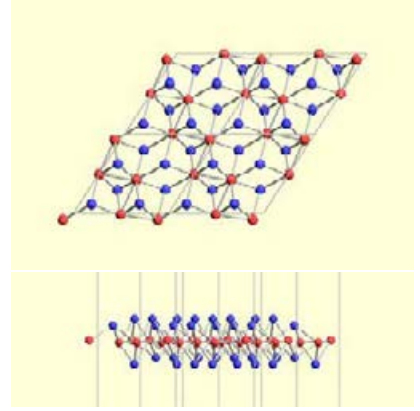

MoTe<sub>2</sub> (P)

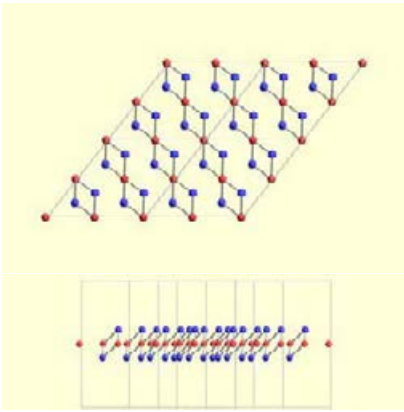

MoI<sub>2</sub> (T)

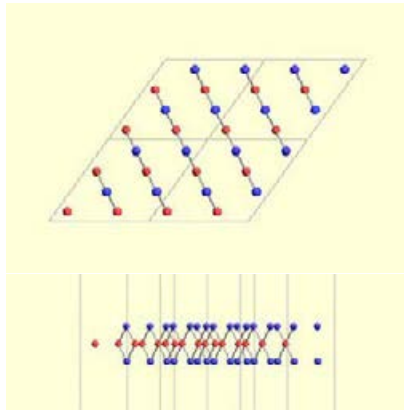

MoI<sub>2</sub> (H)

×

×

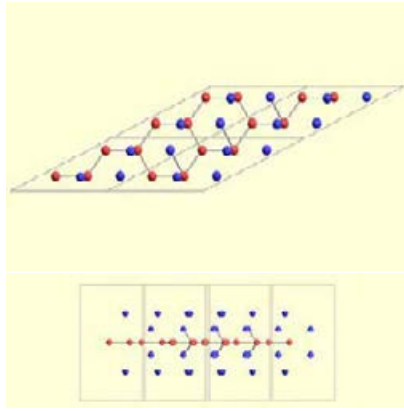

MoTl<sub>2</sub> (H)

×

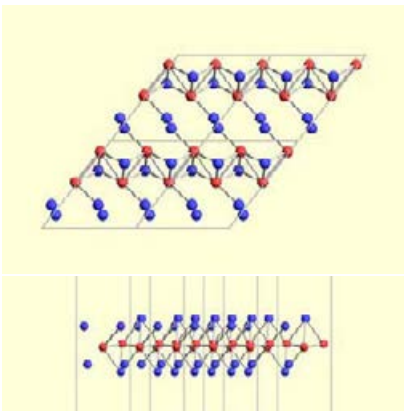

MoBi<sub>2</sub> (T)

×

×

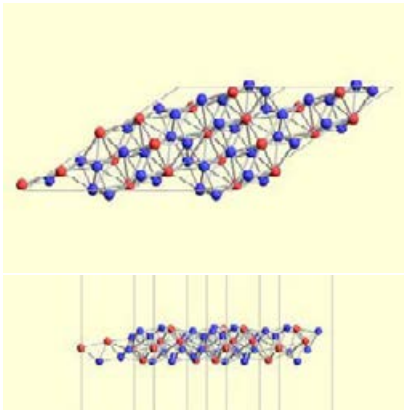

TcBe<sub>2</sub> (T)

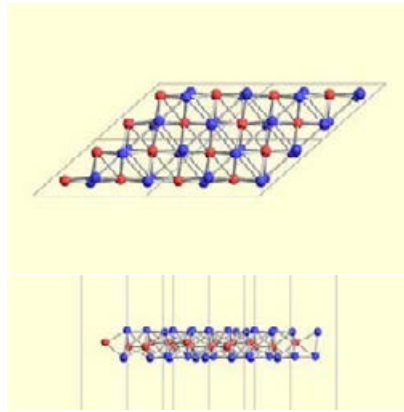

TcBe<sub>2</sub> (H)

×

×

×

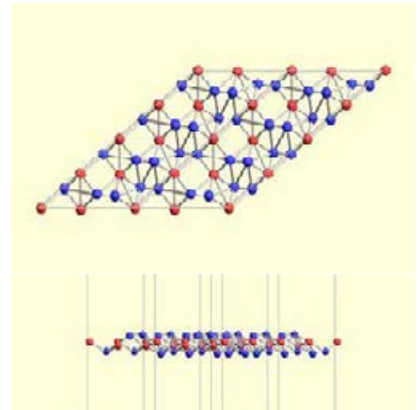

TcC<sub>2</sub> (P)

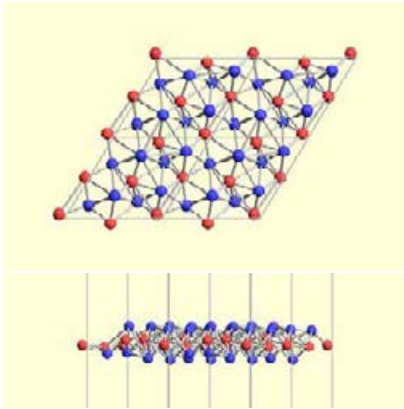

TcN<sub>2</sub> (T)

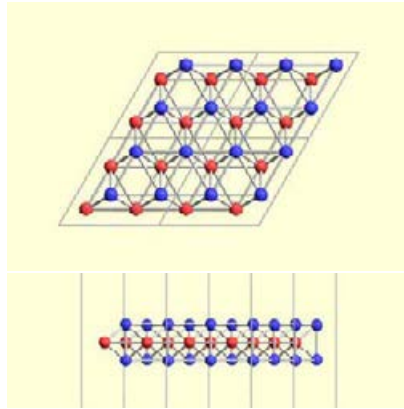

TcN<sub>2</sub> (H)

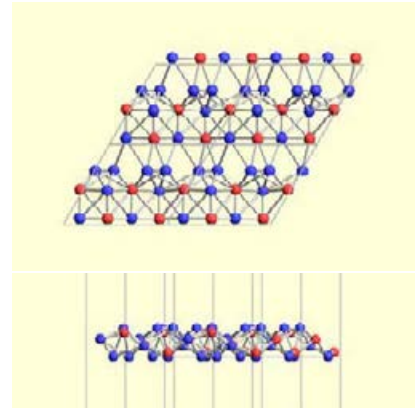

TcN<sub>2</sub> (P)

×

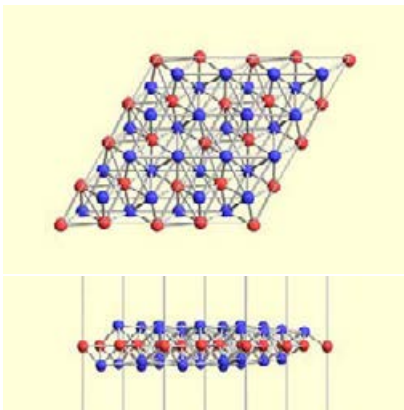

TcO<sub>2</sub> (T)

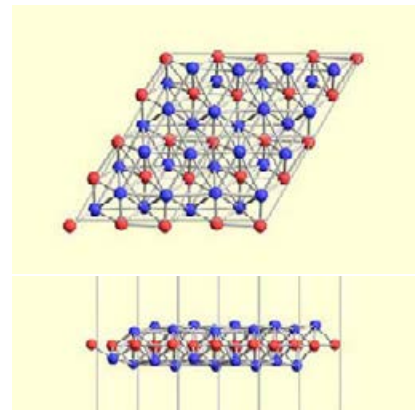

TcO<sub>2</sub> (P)



×

×

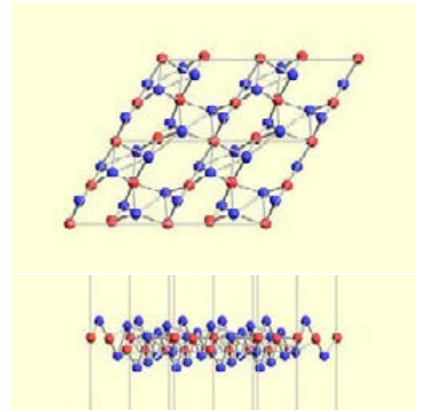

TcF<sub>2</sub> (P)

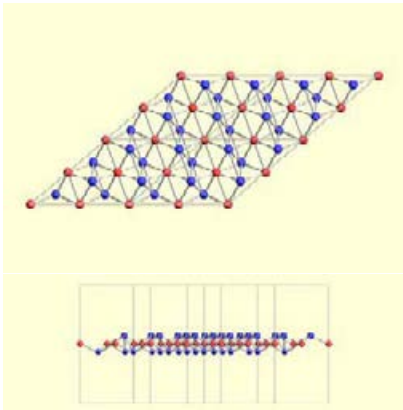

TcSi<sub>2</sub> (T)

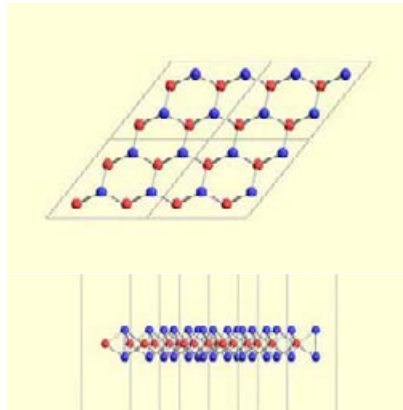

TcSi<sub>2</sub> (H)

×

×

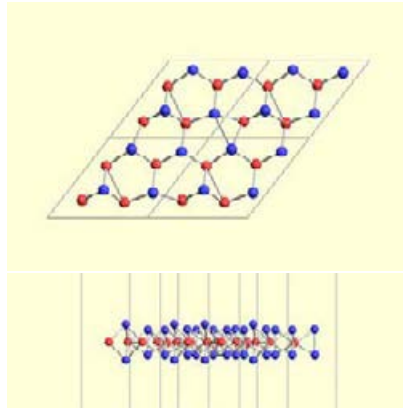

TcP<sub>2</sub> (H)

×

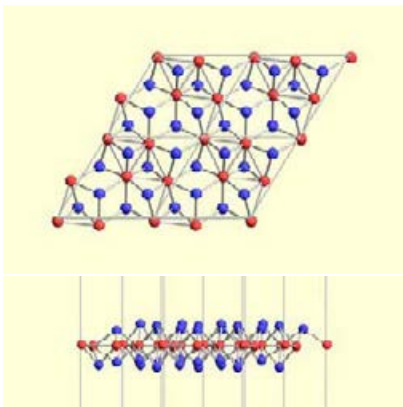

TcS<sub>2</sub> (T)

×

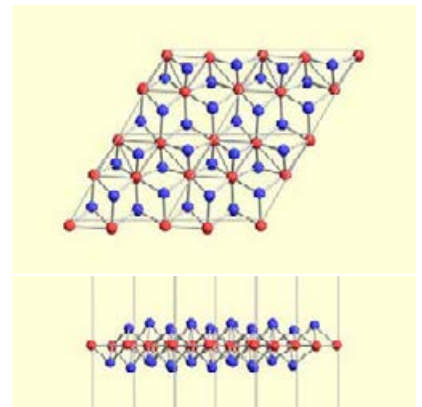

TcS<sub>2</sub> (P)

×

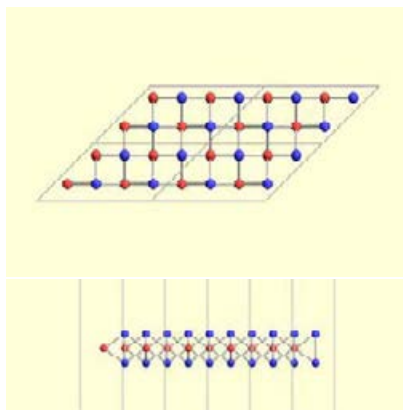

TcTi<sub>2</sub> (H)

×

×

×

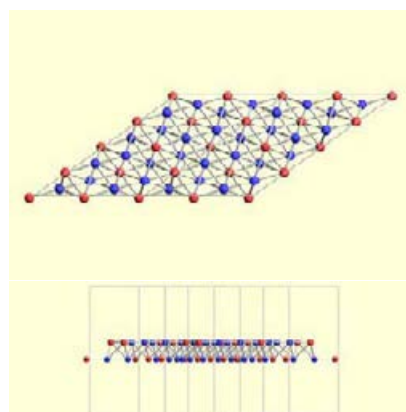

TcV<sub>2</sub> (P)

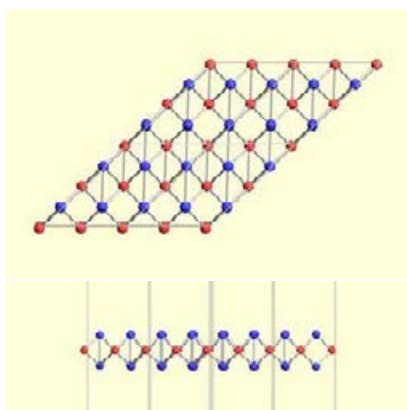

TcMn<sub>2</sub> (T)

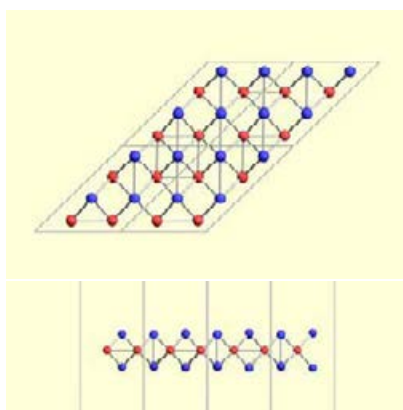

TcMn<sub>2</sub> (H)

×

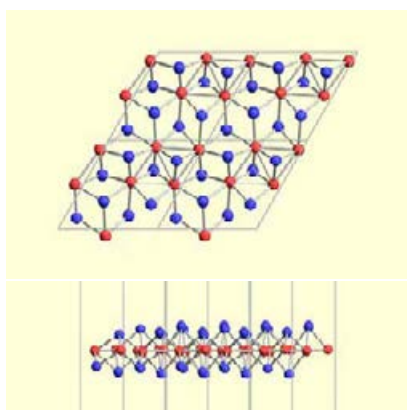

TcSe<sub>2</sub> (T)

×

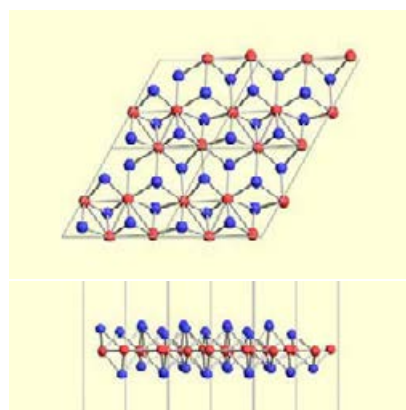

TcSe<sub>2</sub> (P)

×

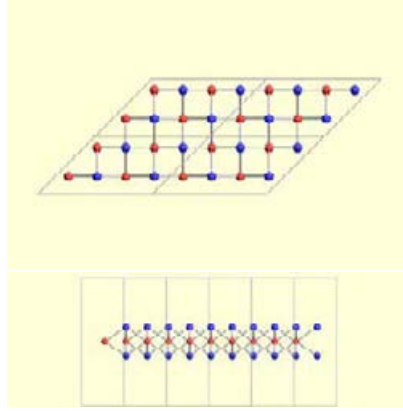

$\text{TcY}_2$  (H)

×

×

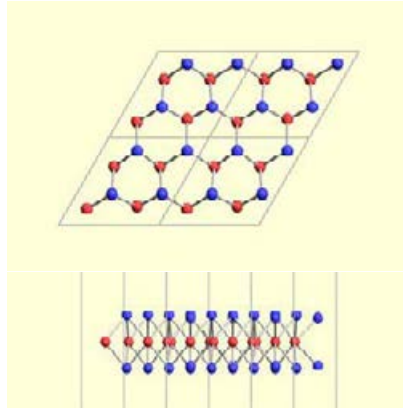

$\text{TcSb}_2$  (H)

×

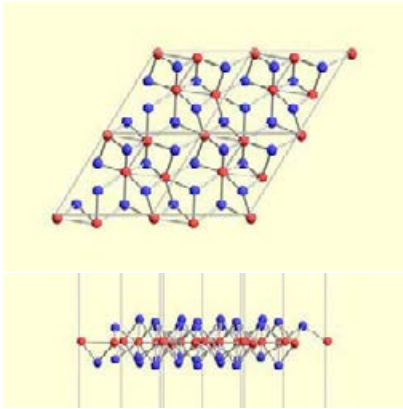

$\text{TcTe}_2$  (T)

×

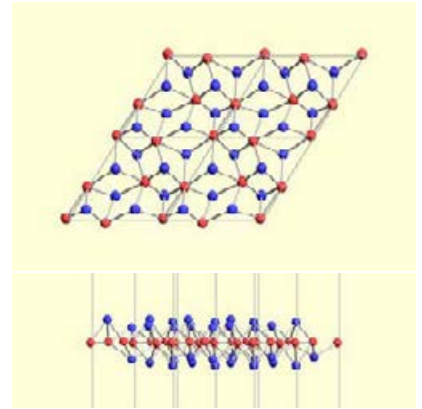

$\text{TcTe}_2$  (P)

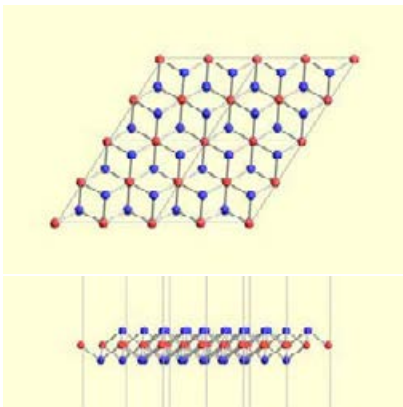

$\text{TcI}_2$  (T)

×

×

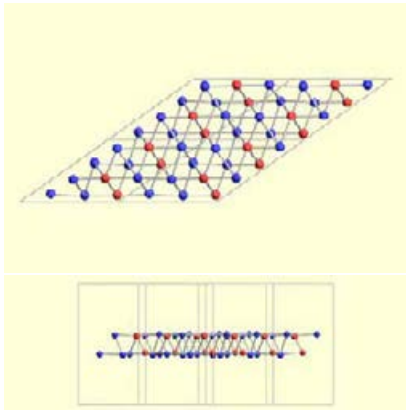

TcTa<sub>2</sub> (T)

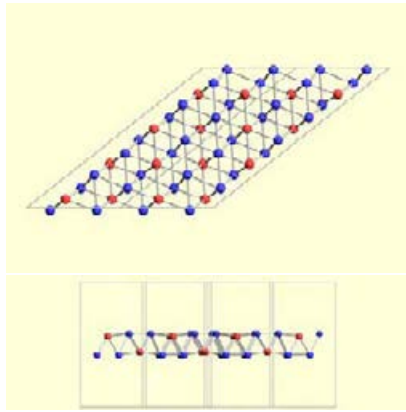

TcTa<sub>2</sub> (H)

×

×

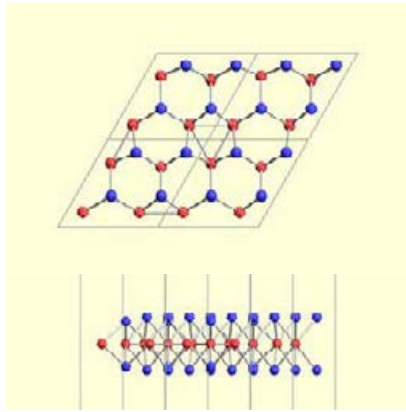

TcBi<sub>2</sub> (H)

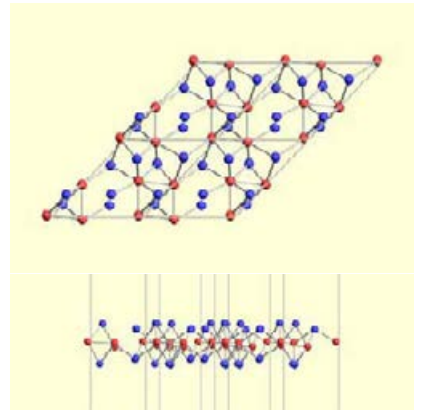

TcBi<sub>2</sub> (P)

×

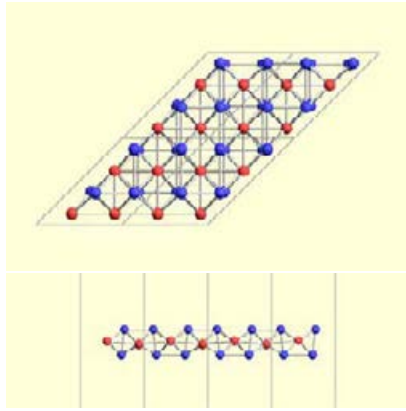

RuBe<sub>2</sub> (H)

×

×

×

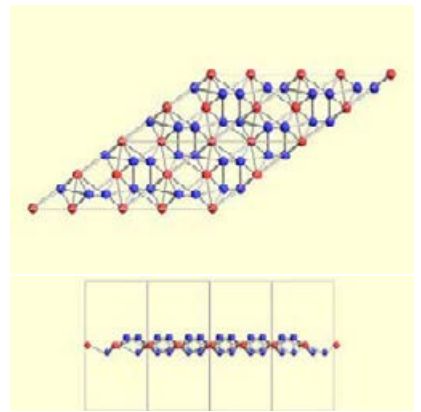

RuC<sub>2</sub> (P)

×

×

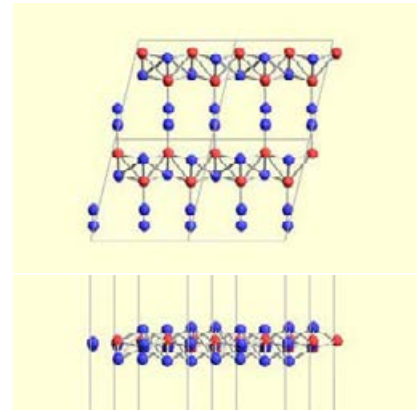

RuN<sub>2</sub> (P)

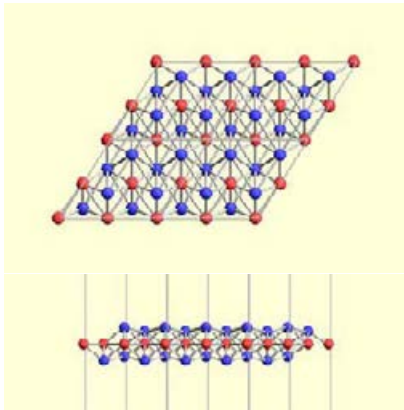

RuO<sub>2</sub> (T)

×

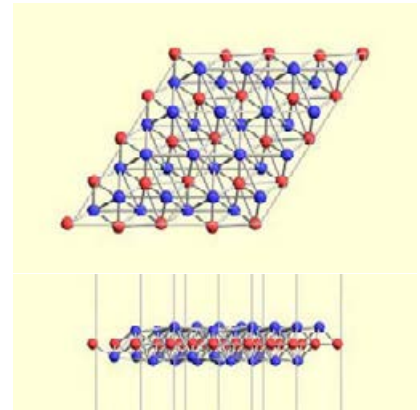

RuO<sub>2</sub> (P)

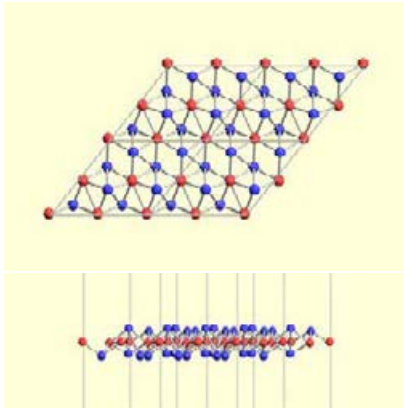

RuF<sub>2</sub> (T)

×

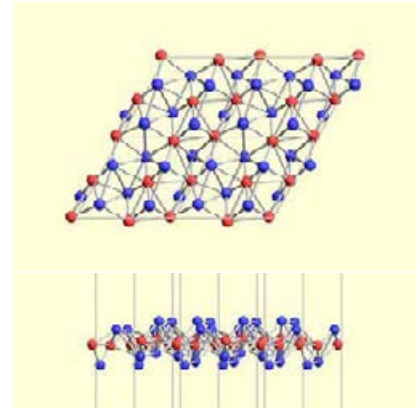

RuF<sub>2</sub> (P)

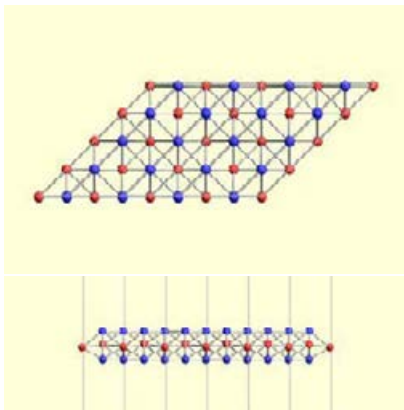

RuAl<sub>2</sub> (T)

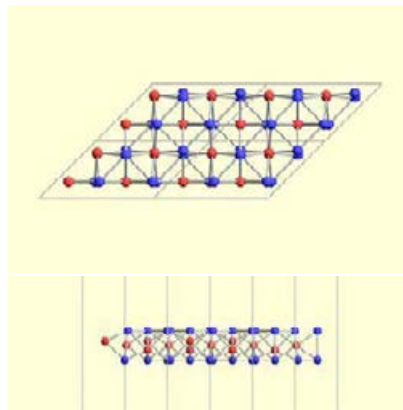

RuAl<sub>2</sub> (H)

×



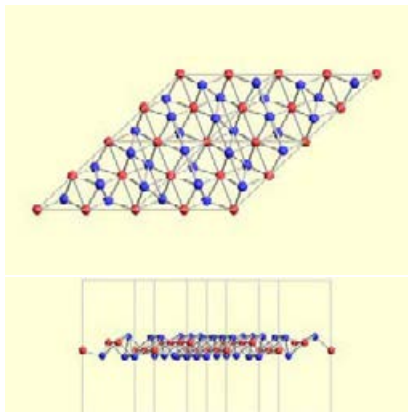

RuP<sub>2</sub> (T)

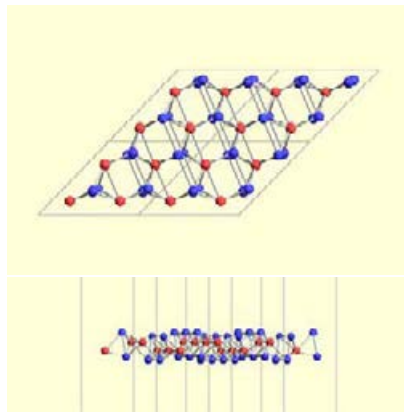

RuP<sub>2</sub> (H)

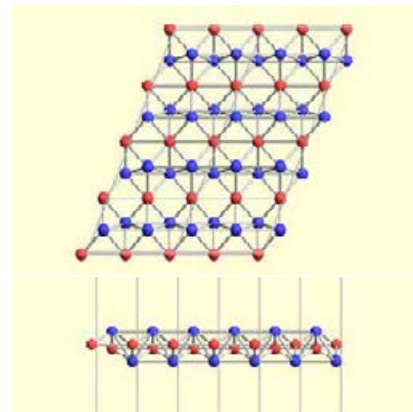

RuP<sub>2</sub> (P)

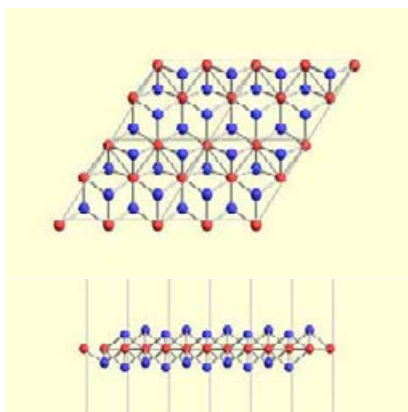

RuS<sub>2</sub> (T)

×

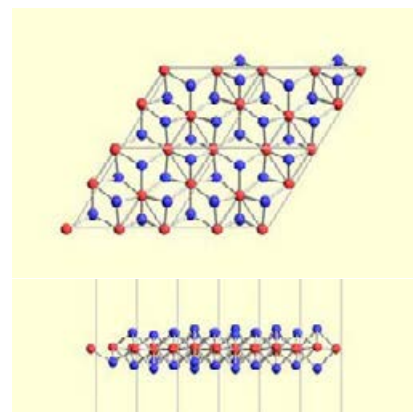

RuS<sub>2</sub> (P)

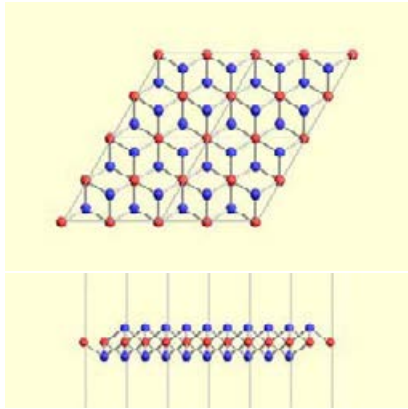

RuCl<sub>2</sub> (T)

×

×

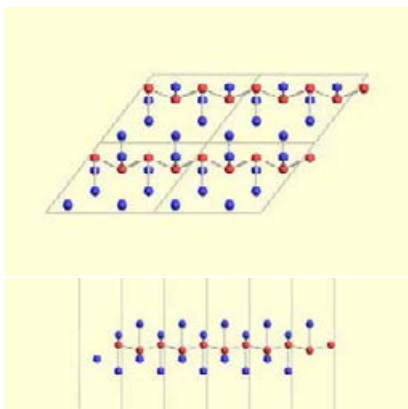

RuCa<sub>2</sub> (T)

×

×

×

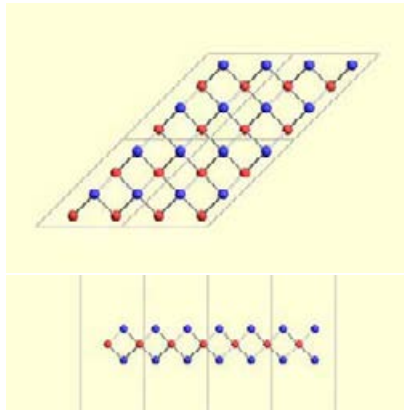

RuSc<sub>2</sub> (H)

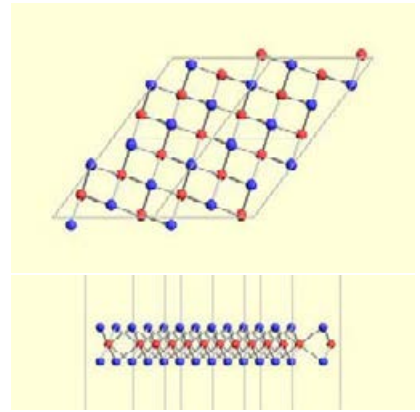

RuSc<sub>2</sub> (P)

×

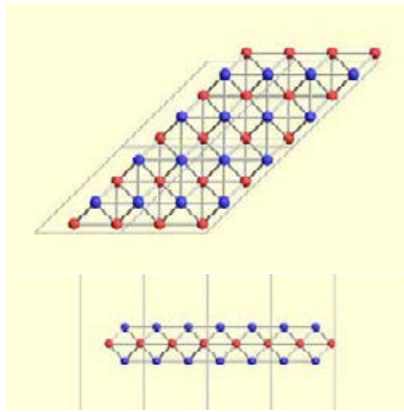

RuTi<sub>2</sub> (H)

×

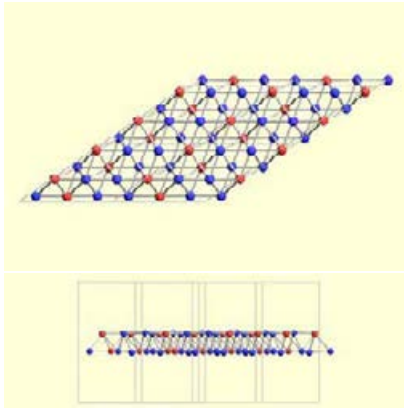

RuV<sub>2</sub> (T)

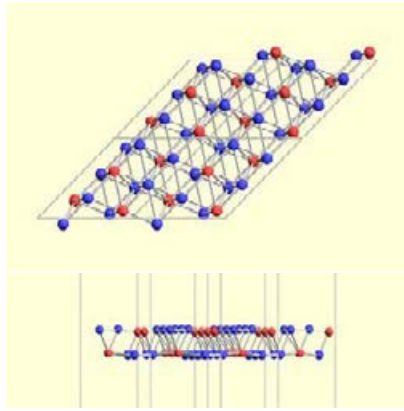

RuV<sub>2</sub> (H)

×

×

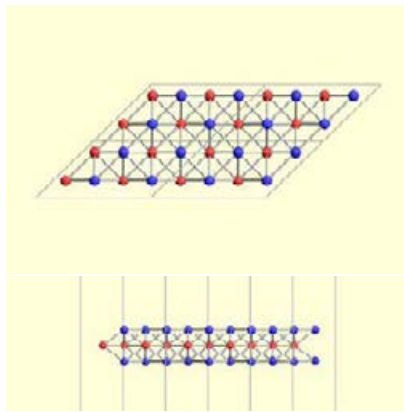

RuMn<sub>2</sub> (H)

×

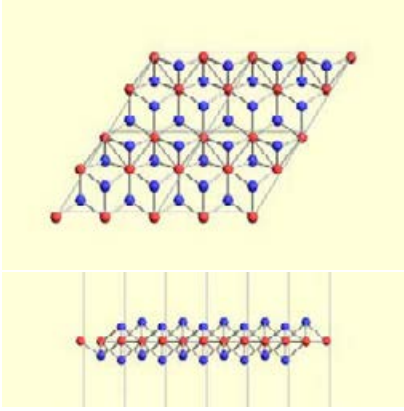

RuSe<sub>2</sub> (T)

×

×

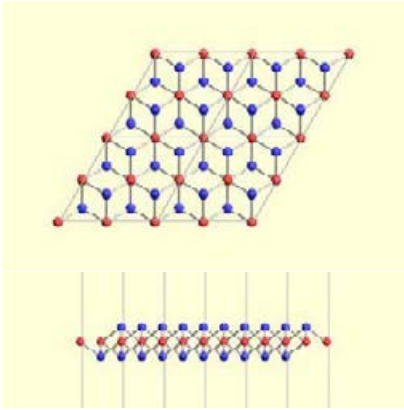

RuBr<sub>2</sub> (T)

×

×

×

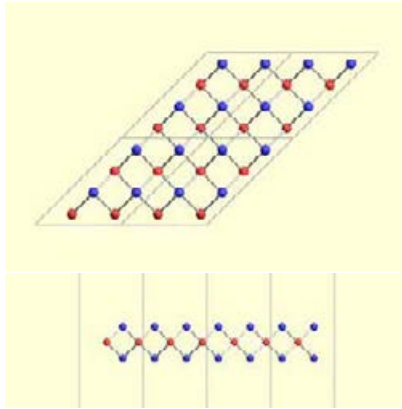

RuY<sub>2</sub> (H)

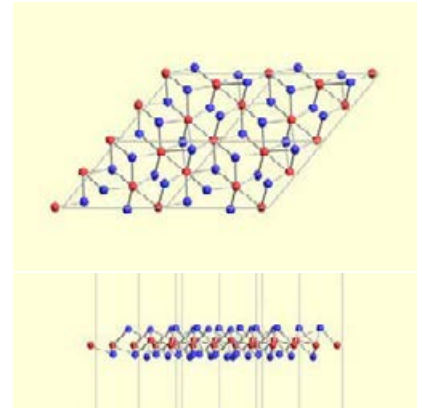

RuY<sub>2</sub> (P)

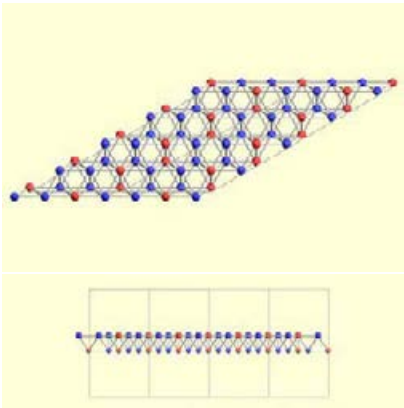

RuTc<sub>2</sub> (T)

×

×

×

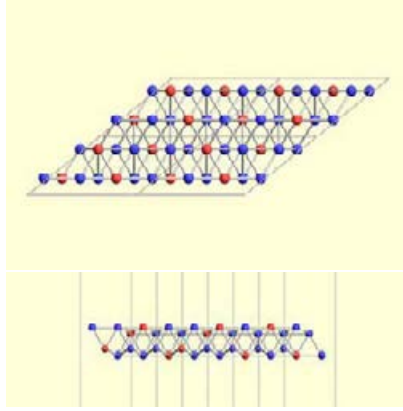

RuRu<sub>2</sub> (H)

×

×

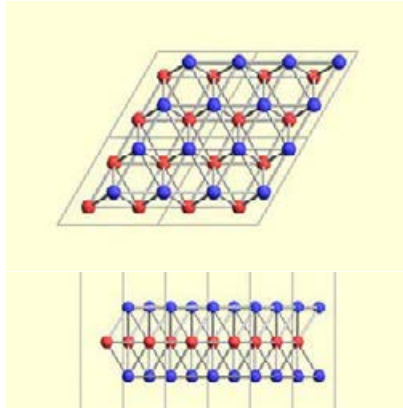

RuPd<sub>2</sub> (H)

×

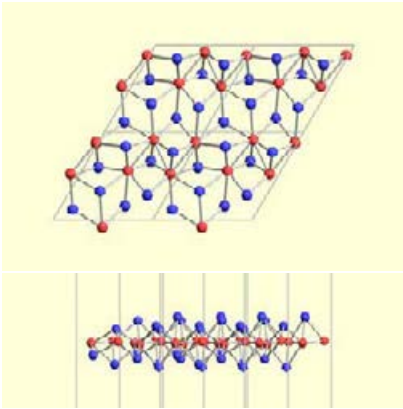

RuSb<sub>2</sub> (T)

×

×

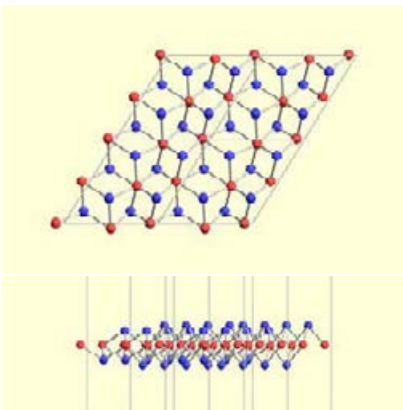

RuTe<sub>2</sub> (T)

×

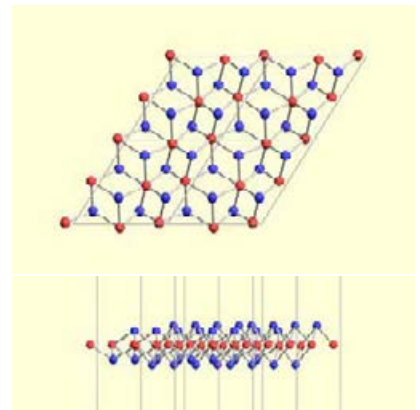

RuTe<sub>2</sub> (P)

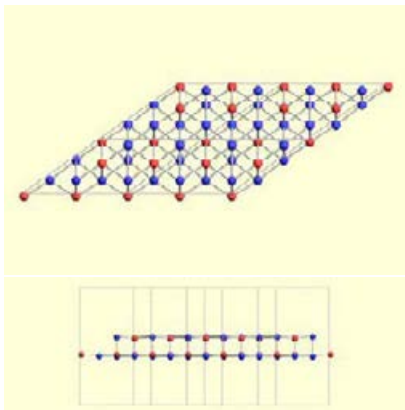

RuTa<sub>2</sub> (T)

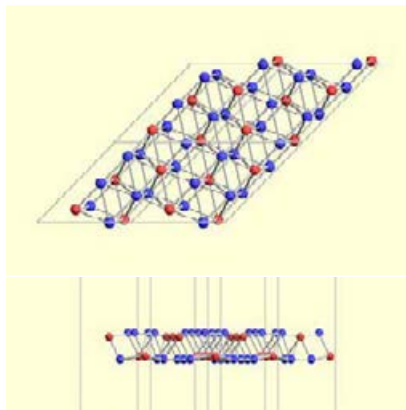

RuTa<sub>2</sub> (H)

×

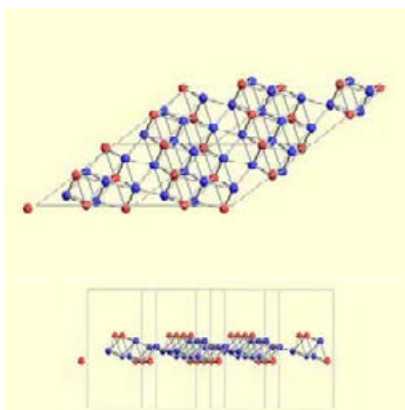

RuOs<sub>2</sub> (T)

×

×

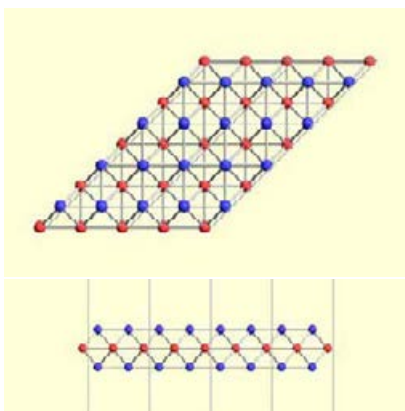

RhLi<sub>2</sub> (T)

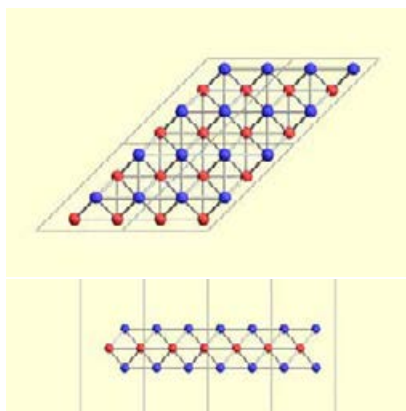

RhLi<sub>2</sub> (H)

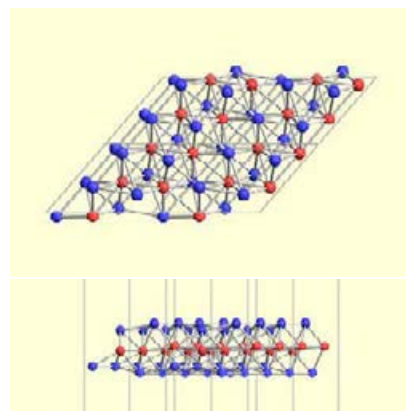

RhLi<sub>2</sub> (P)

×

×

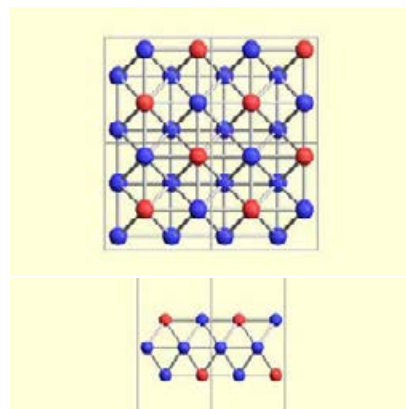

RhBe<sub>2</sub> (P)



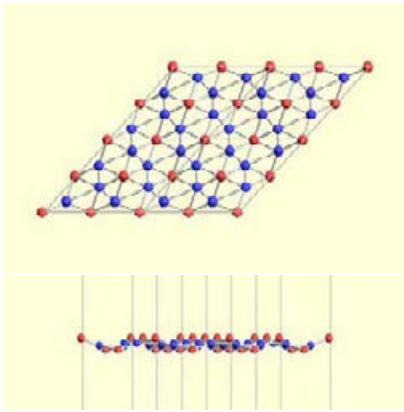

RhB<sub>2</sub> (T)

×

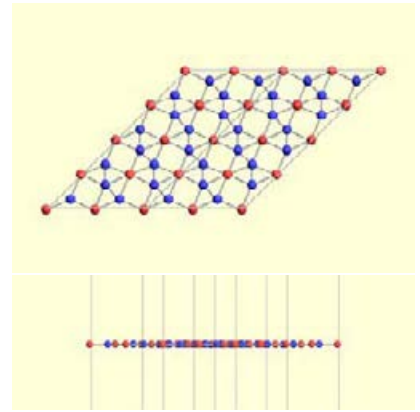

RhB<sub>2</sub> (P)

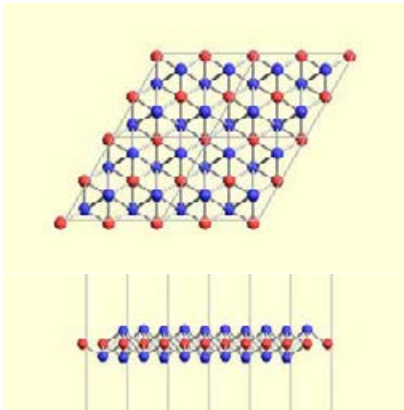

RhO<sub>2</sub> (T)

×

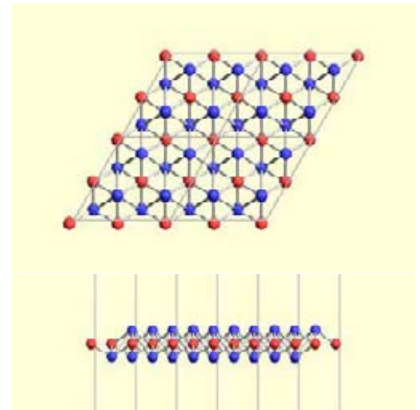

RhO<sub>2</sub> (P)

×

×

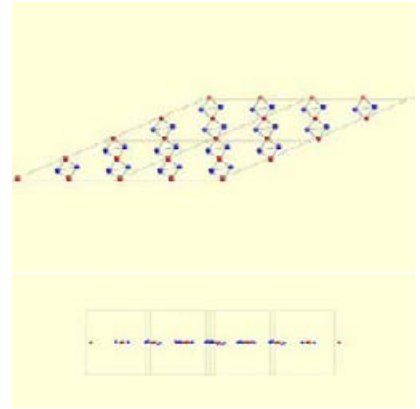

RhF<sub>2</sub> (P)

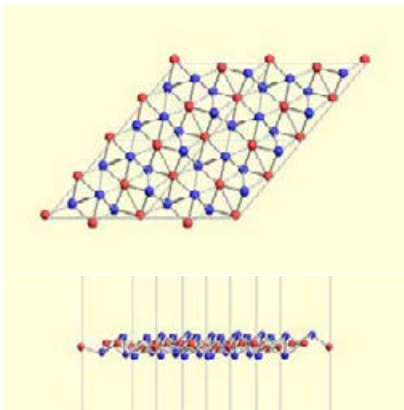

RhP<sub>2</sub> (T)

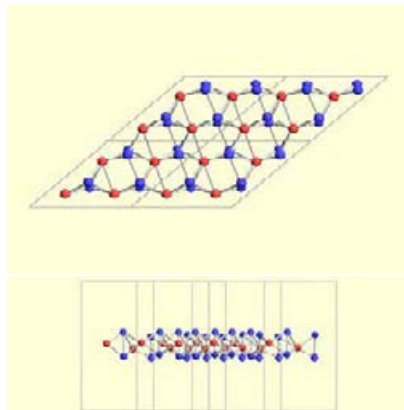

RhP<sub>2</sub> (H)

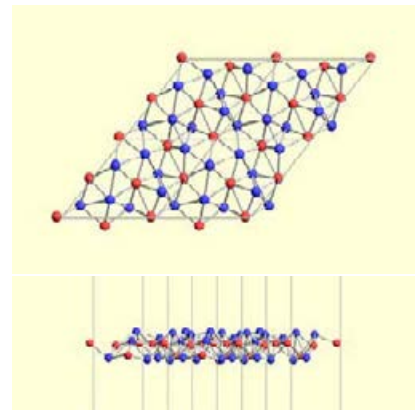

RhP<sub>2</sub> (P)

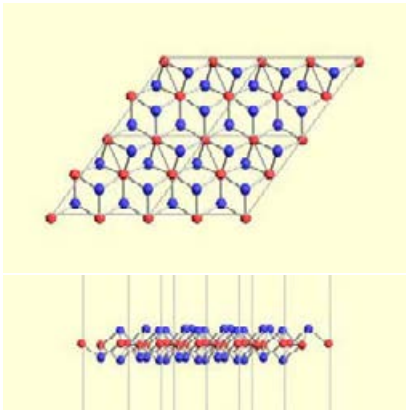

RhS<sub>2</sub> (T)

×

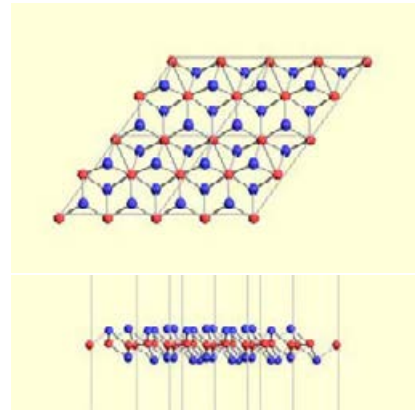

RhS<sub>2</sub> (P)

×

×

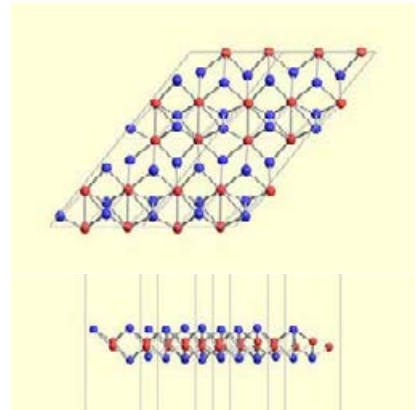

RhSc<sub>2</sub> (P)

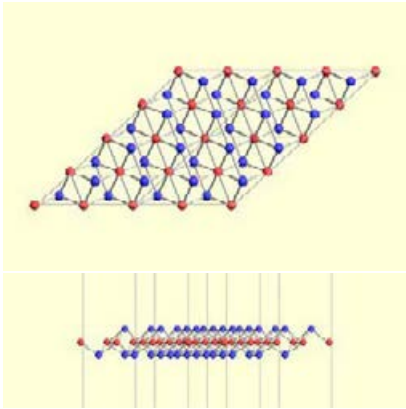

RhGa<sub>2</sub> (T)

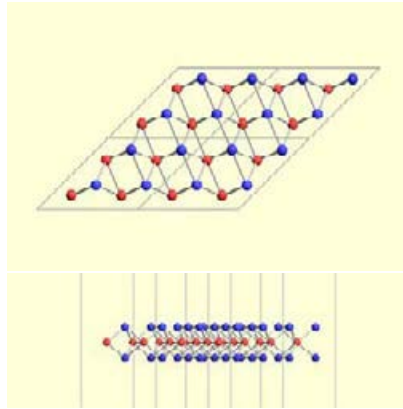

RhGa<sub>2</sub> (H)

×

×

×

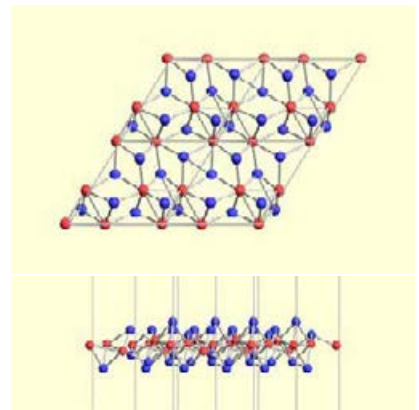

RhAs<sub>2</sub> (P)

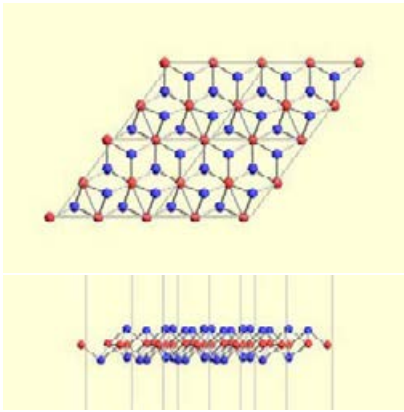

RhSe<sub>2</sub> (T)

×

×

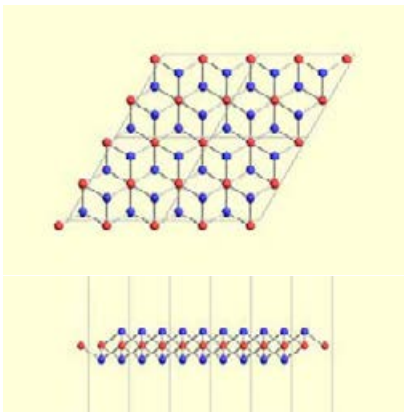

RhY<sub>2</sub> (T)

×

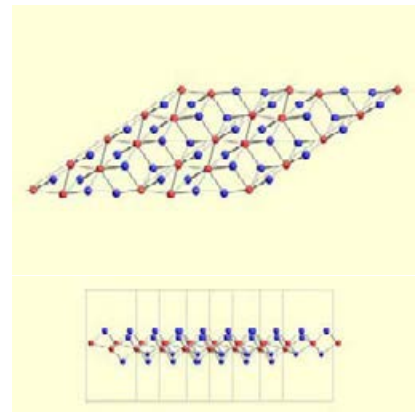

RhY<sub>2</sub> (P)

×

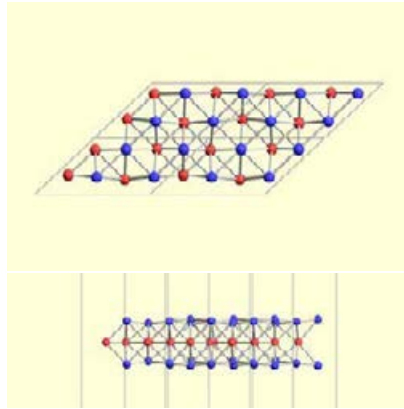

RhAg<sub>2</sub> (H)

×

×

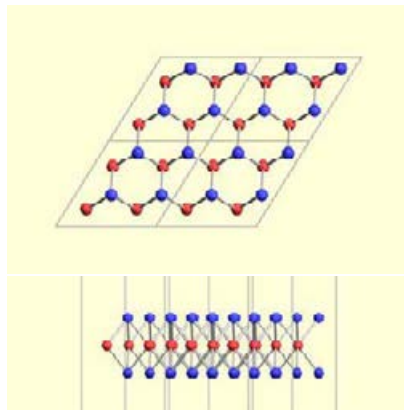

RhIn<sub>2</sub> (H)

×

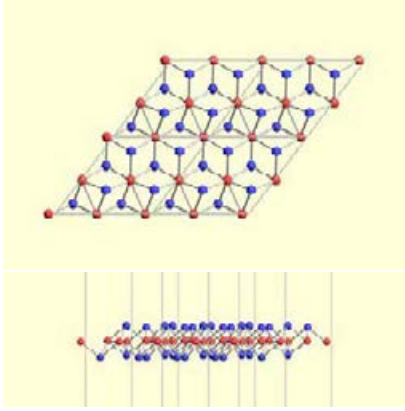

RhTe<sub>2</sub> (T)

×

×

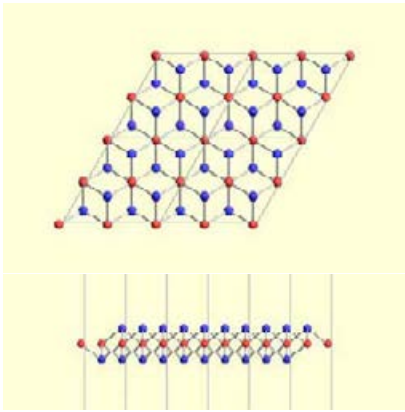

RhI<sub>2</sub> (T)

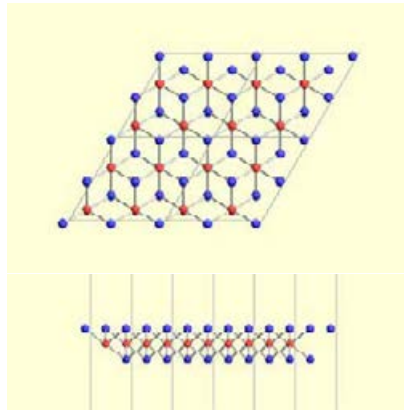

RhI<sub>2</sub> (H)

×

×

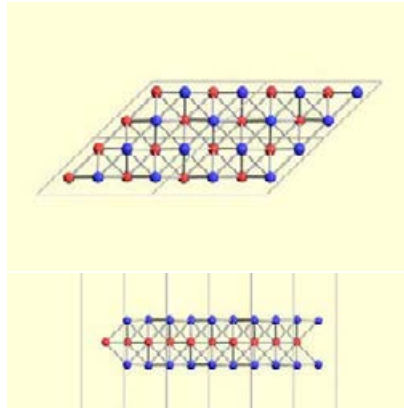

RhAu<sub>2</sub> (H)

×

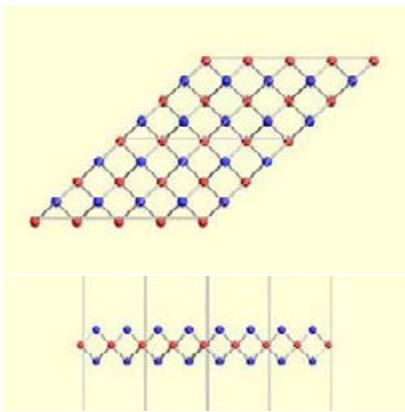

RhHg<sub>2</sub> (T)

×

×

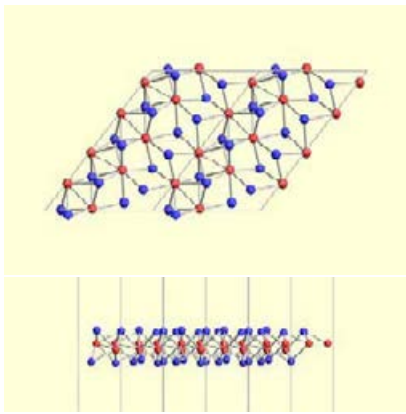

RhBi<sub>2</sub> (T)

×

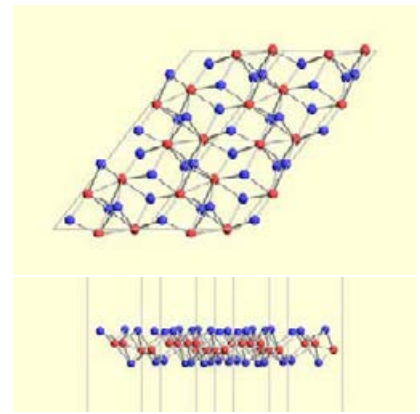

RhBi<sub>2</sub> (P)

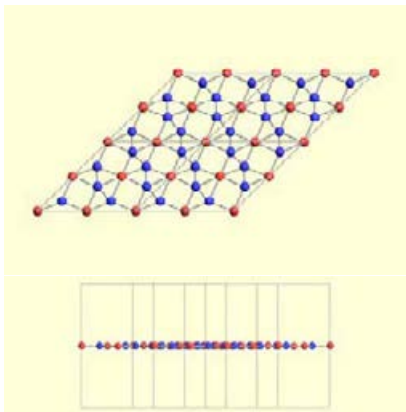

PdB<sub>2</sub> (T)

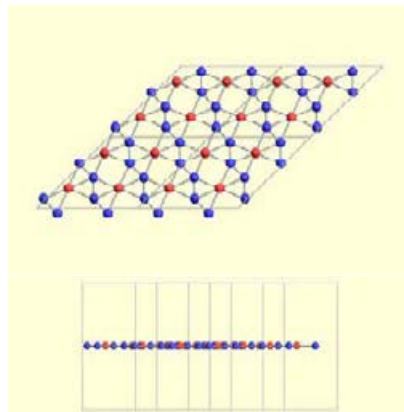

PdB<sub>2</sub> (H)

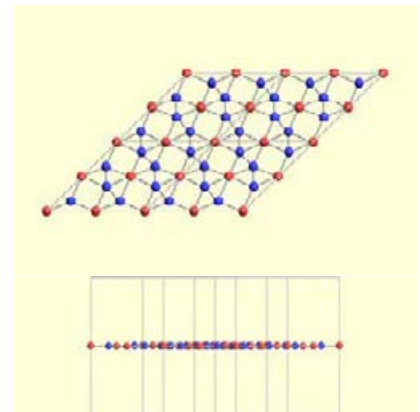

PdB<sub>2</sub> (P)

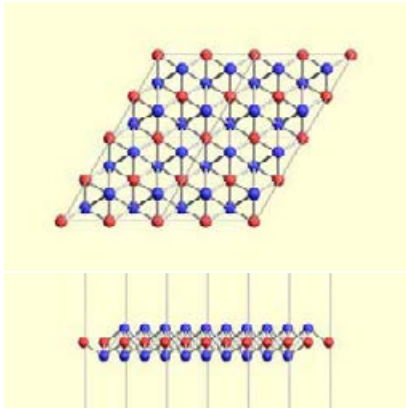

PdO<sub>2</sub> (T)

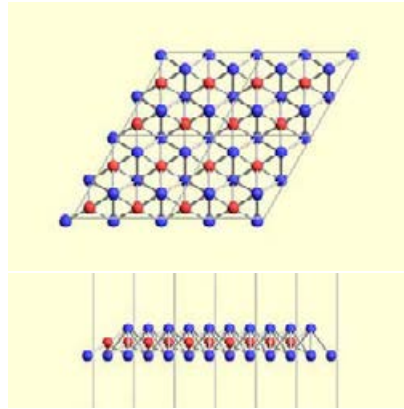

PdO<sub>2</sub> (H)

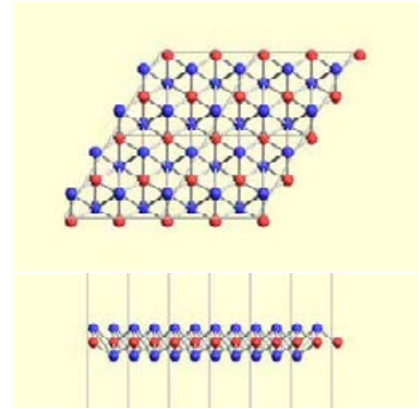

PdO<sub>2</sub> (P)

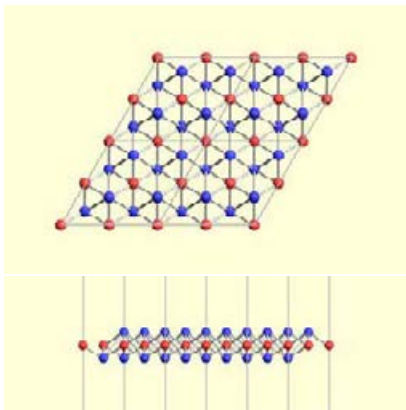

PdF<sub>2</sub> (T)

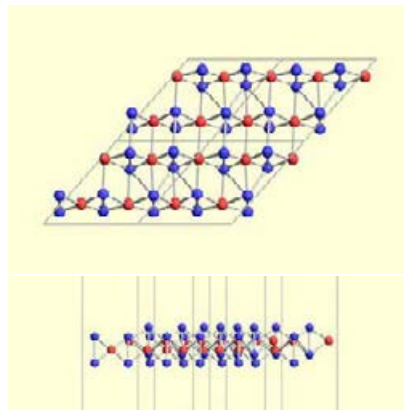

PdF<sub>2</sub> (H)

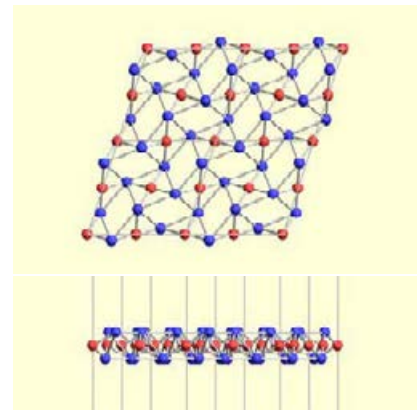

PdF<sub>2</sub> (P)



×

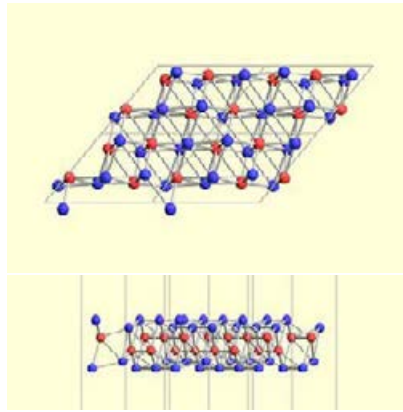

×

PdAl<sub>2</sub> (H)

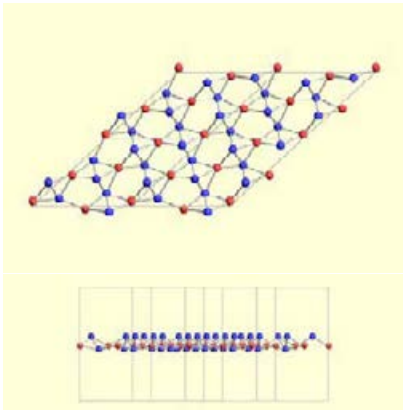

PdP<sub>2</sub> (T)

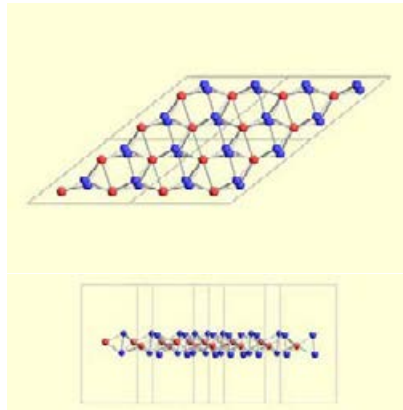

PdP<sub>2</sub> (H)

×

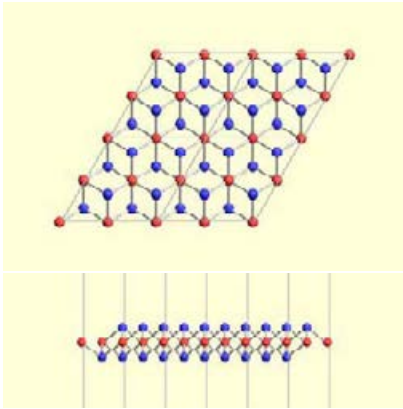

PdS<sub>2</sub> (T)

×

×

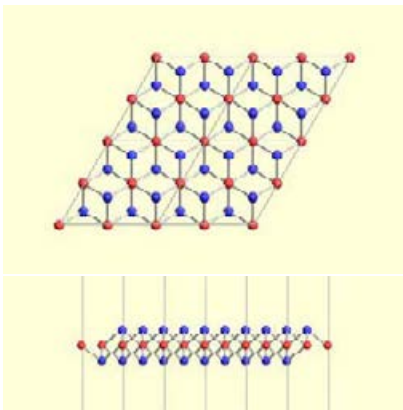

PdCl<sub>2</sub> (T)

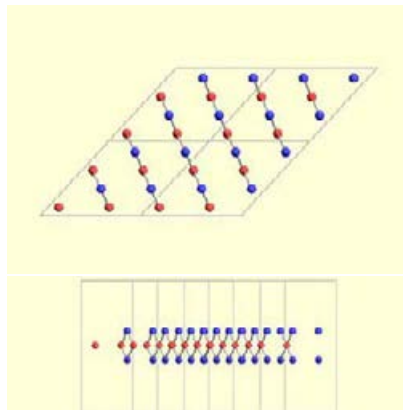

PdCl<sub>2</sub> (H)

×

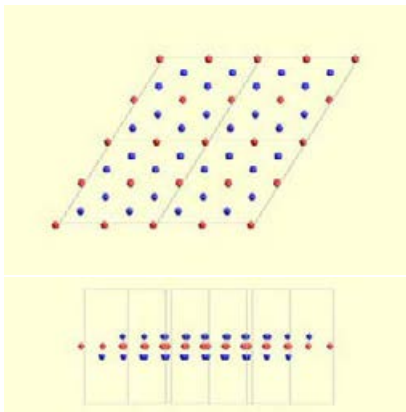

PdK<sub>2</sub> (T)

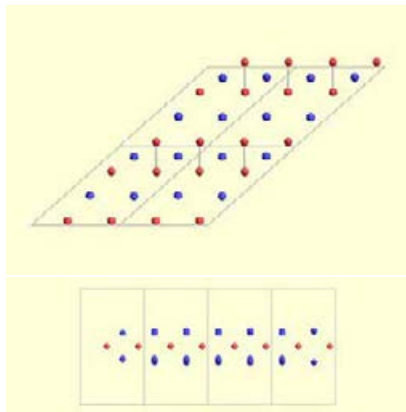

PdK<sub>2</sub> (H)

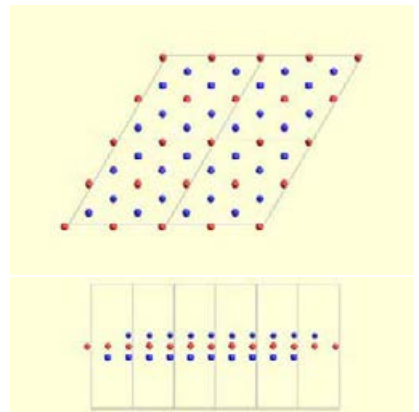

PdK<sub>2</sub> (P)

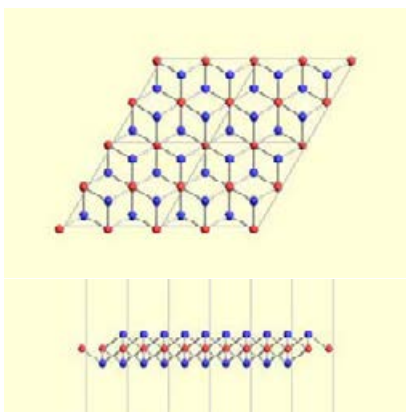

PdCa<sub>2</sub> (T)

×

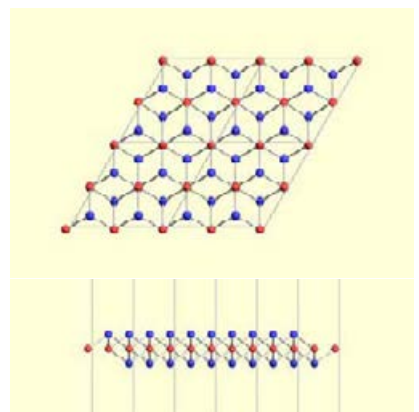

PdCa<sub>2</sub> (P)

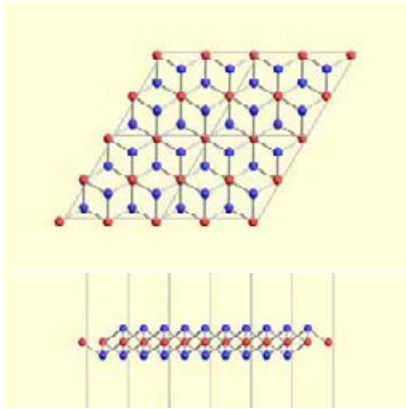

PdSc<sub>2</sub> (T)

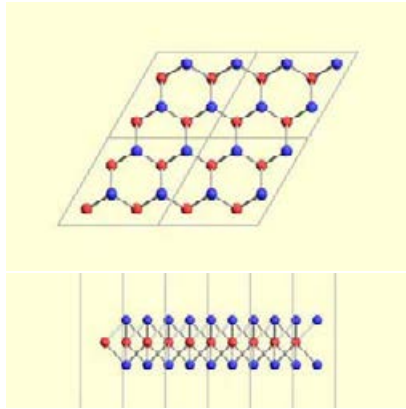

PdSc<sub>2</sub> (H)

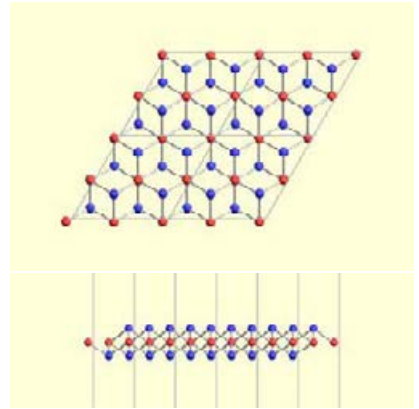

PdSc<sub>2</sub> (P)

×

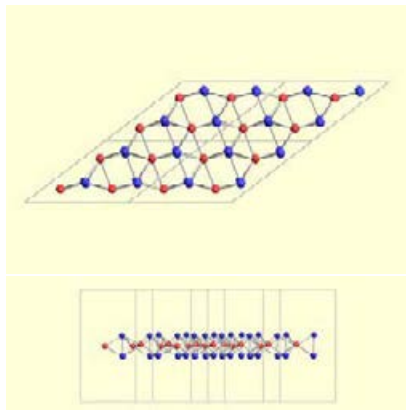

PdAs<sub>2</sub> (H)

×

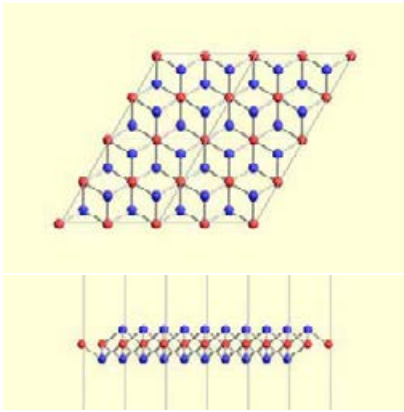

PdSe<sub>2</sub> (T)

×

×

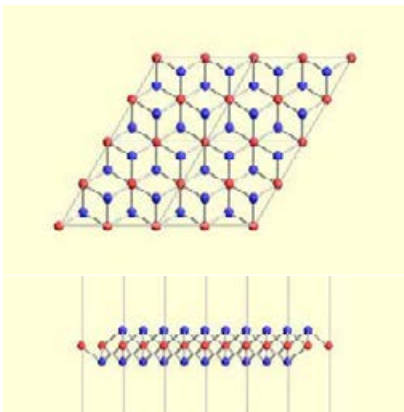

PdBr<sub>2</sub> (T)

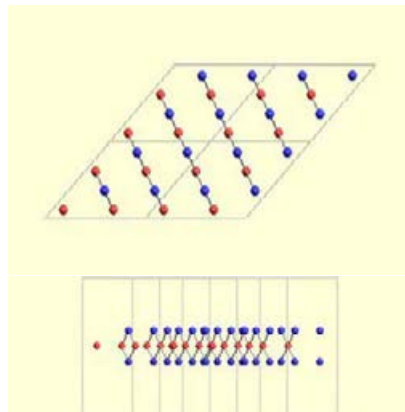

PdBr<sub>2</sub> (H)

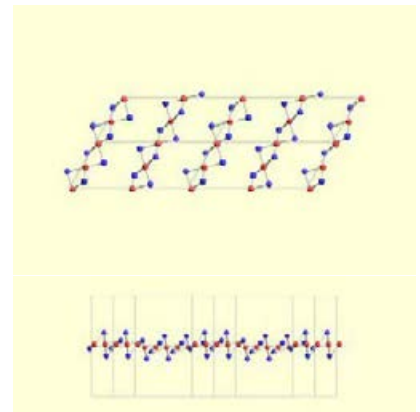

PdBr<sub>2</sub> (P)

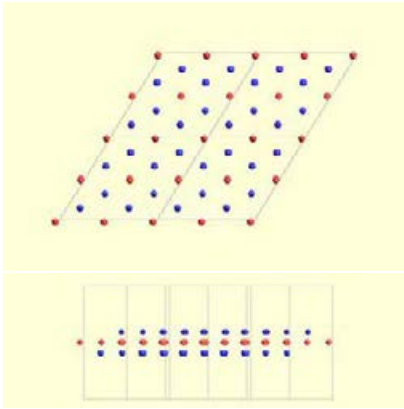

PdRb<sub>2</sub> (T)

×

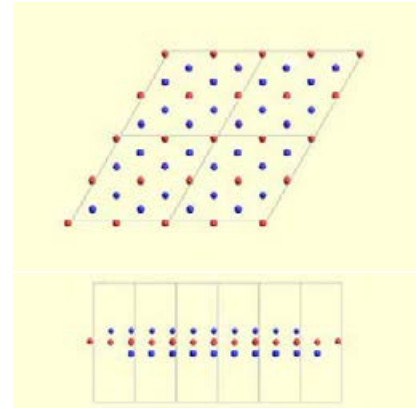

PdRb<sub>2</sub> (P)

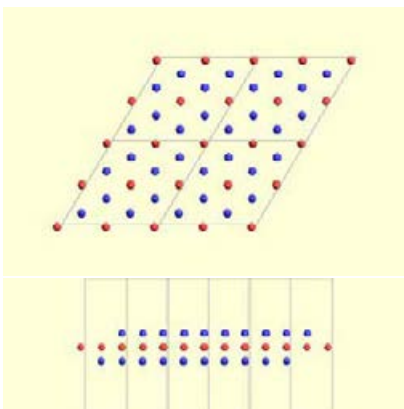

PdSr<sub>2</sub> (T)

×

×

×

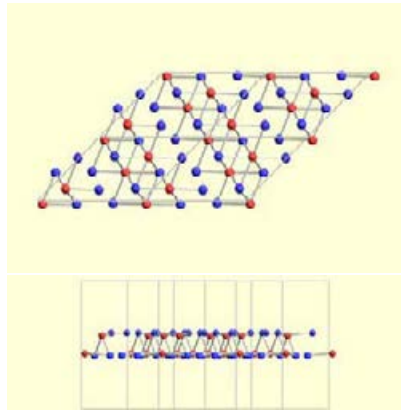

PdZr<sub>2</sub> (H)

×

×

×

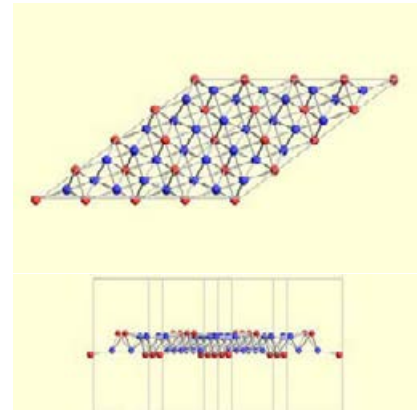

PdRu<sub>2</sub> (P)

×

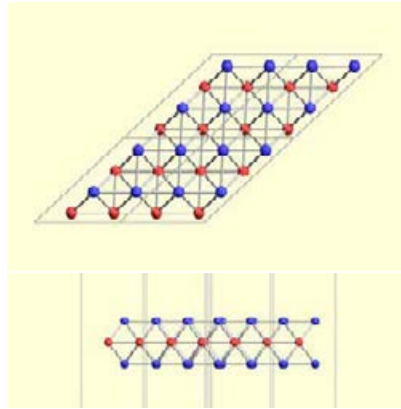

PdAg<sub>2</sub> (H)

×

×

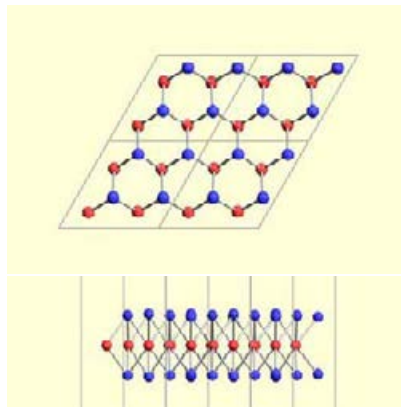

PdIn<sub>2</sub> (H)

×

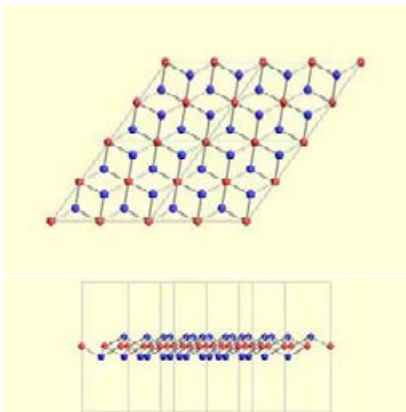

PdSb<sub>2</sub> (T)

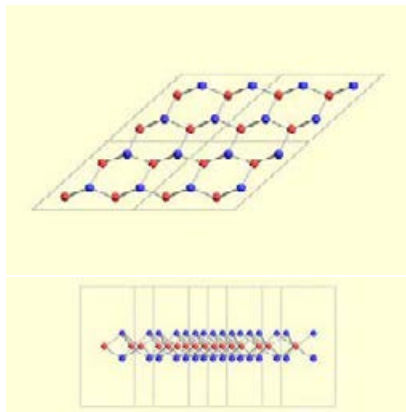

PdSb<sub>2</sub> (H)

×

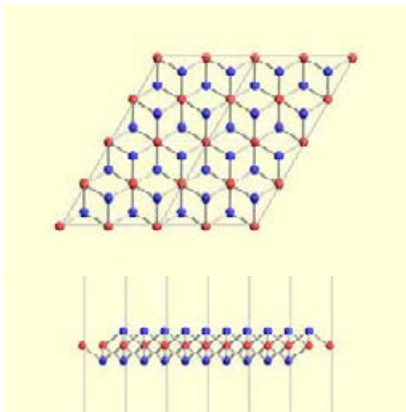

PdTe<sub>2</sub> (T)

×

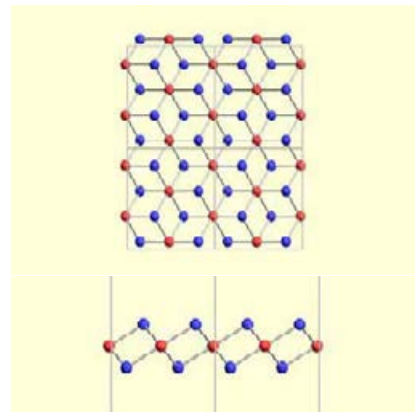

PdTe<sub>2</sub> (P)

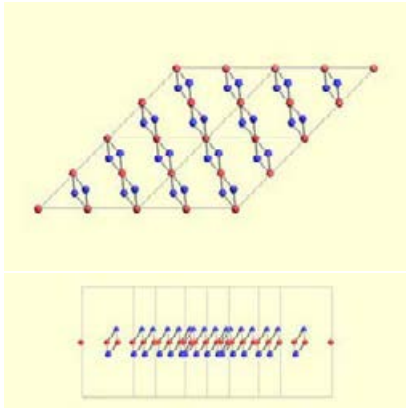

PdI<sub>2</sub> (T)

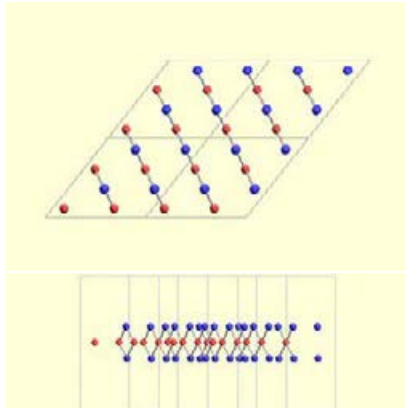

PdI<sub>2</sub> (H)

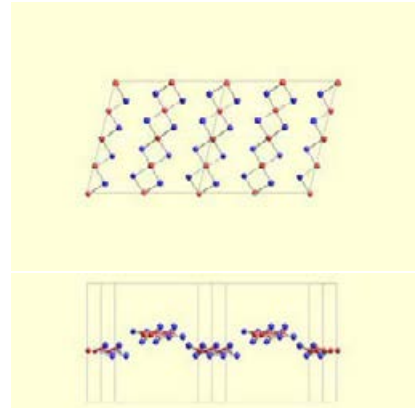

PdI<sub>2</sub> (P)

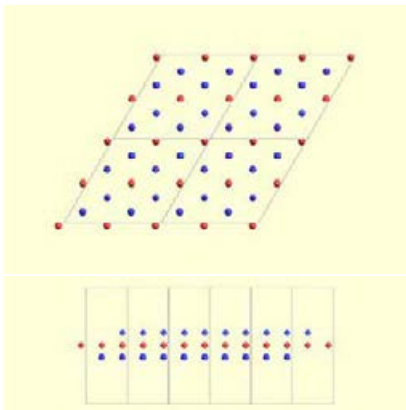

PdCs<sub>2</sub> (T)

×

×



×

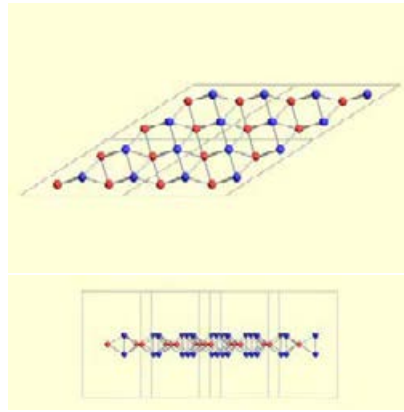

PdIr<sub>2</sub> (H)

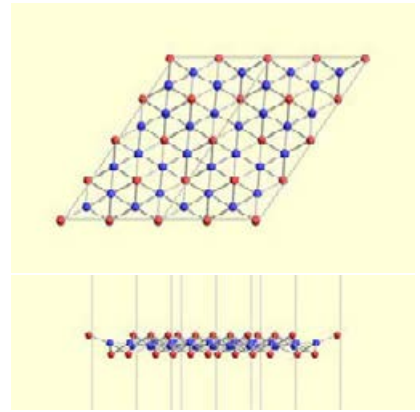

PdIr<sub>2</sub> (P)

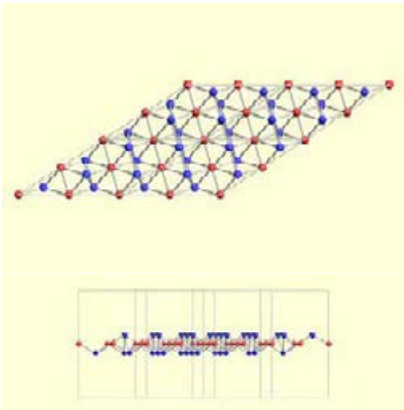

PdPt<sub>2</sub> (T)

×

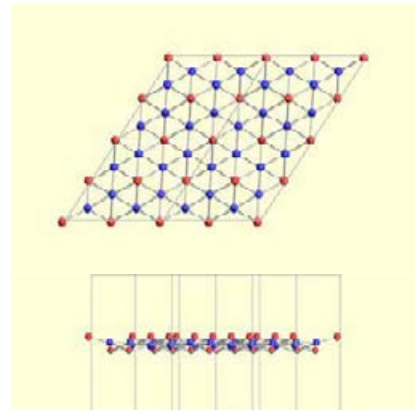

PdPt<sub>2</sub> (P)

×

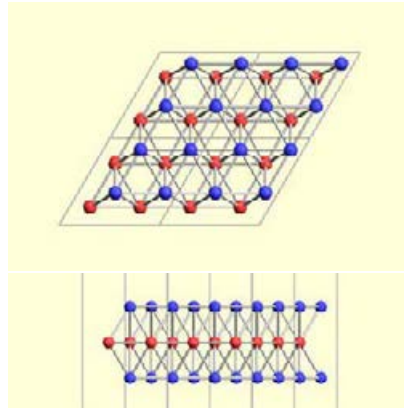

PdAu<sub>2</sub> (H)

×

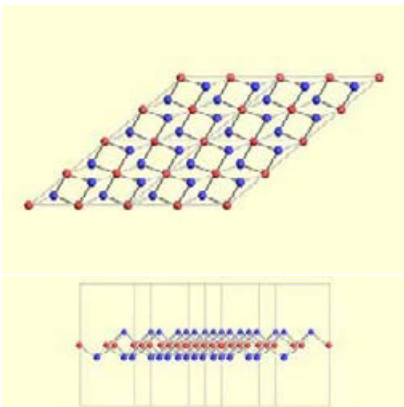

PdHg<sub>2</sub> (T)

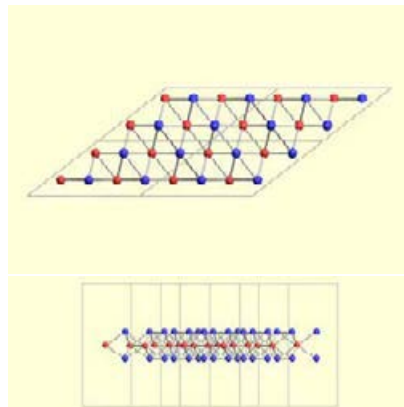

PdHg<sub>2</sub> (H)

×

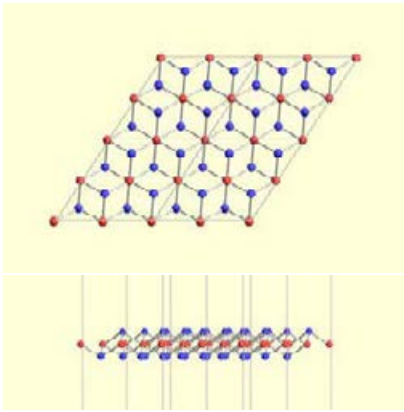

PdTi<sub>2</sub> (T)

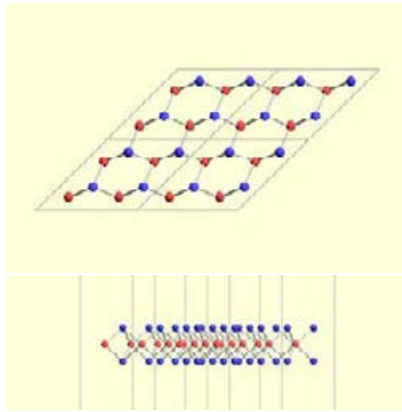

PdTi<sub>2</sub> (H)

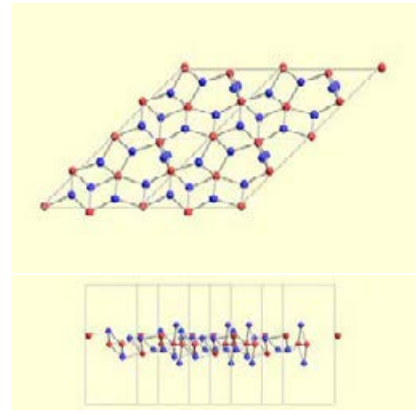

PdTi<sub>2</sub> (P)

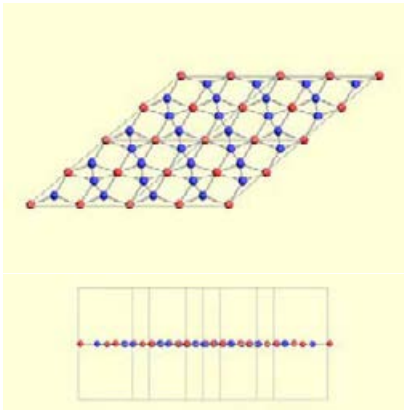

AgB<sub>2</sub> (T)

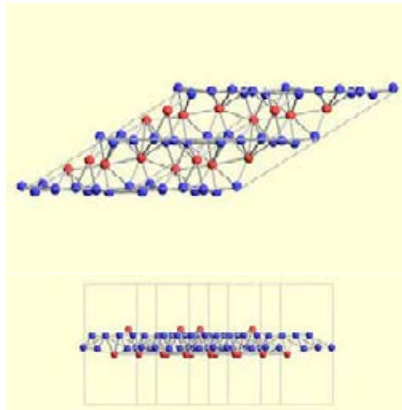

AgB<sub>2</sub> (H)

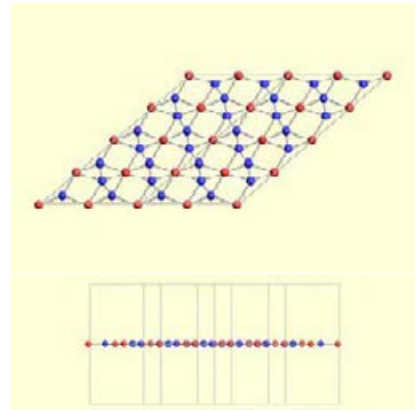

AgB<sub>2</sub> (P)

×

×

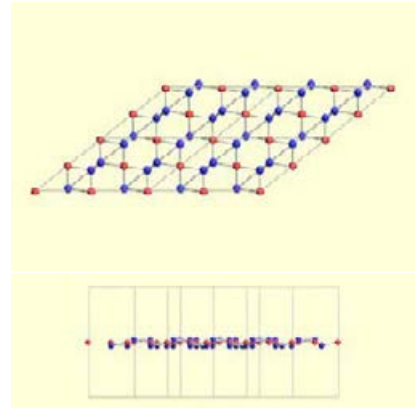

AgO<sub>2</sub> (P)

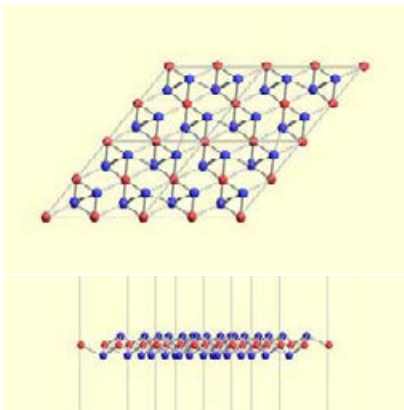

AgF<sub>2</sub> (T)

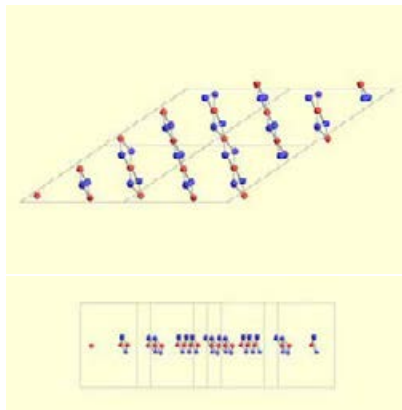

AgF<sub>2</sub> (H)

×

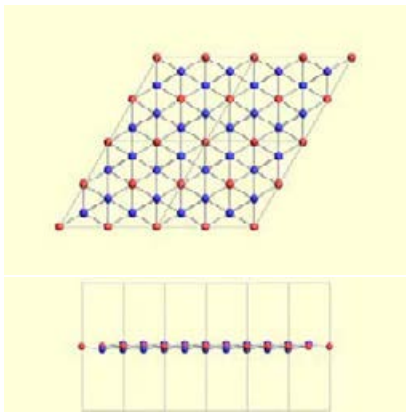

AgAl<sub>2</sub> (T)

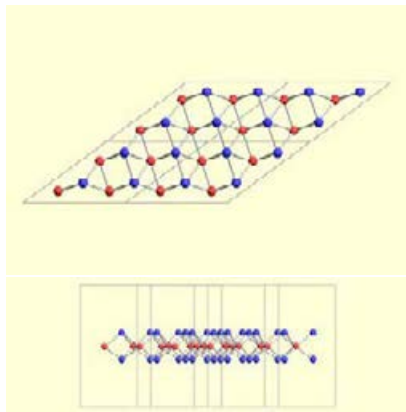

AgAl<sub>2</sub> (H)

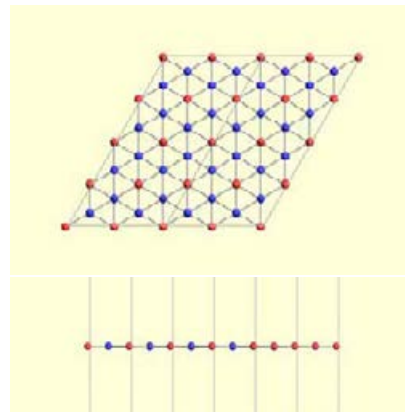

AgAl<sub>2</sub> (P)

×

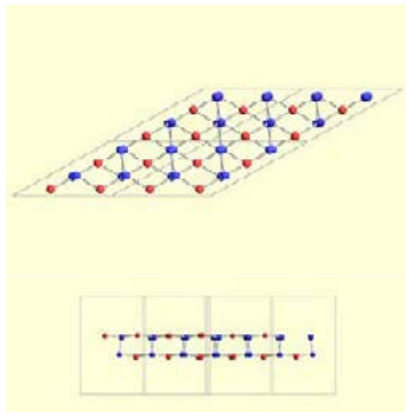

AgSi<sub>2</sub> (H)

×

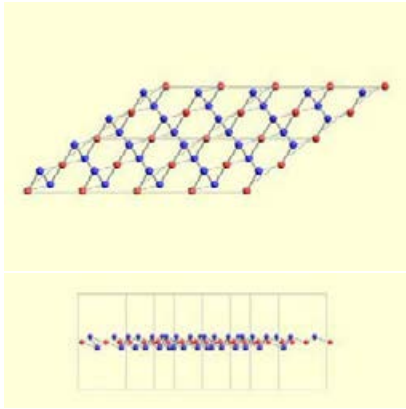

AgP<sub>2</sub> (T)

×

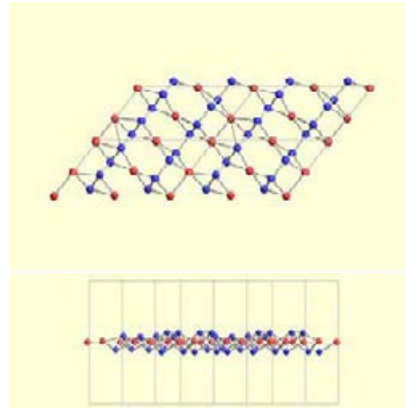

AgP<sub>2</sub> (P)

×

×

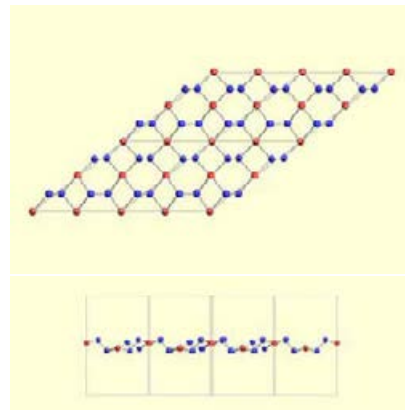

AgS<sub>2</sub> (P)

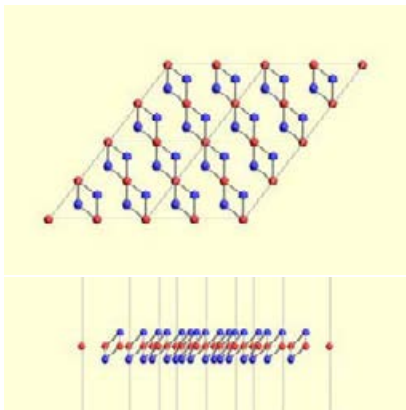

AgCl<sub>2</sub> (T)

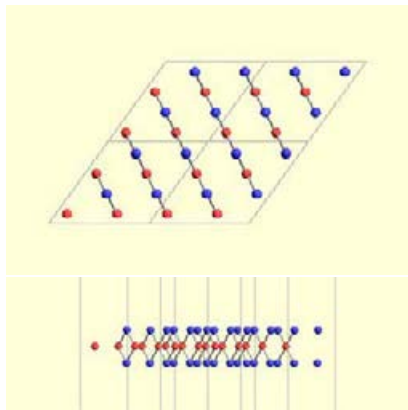

AgCl<sub>2</sub> (H)

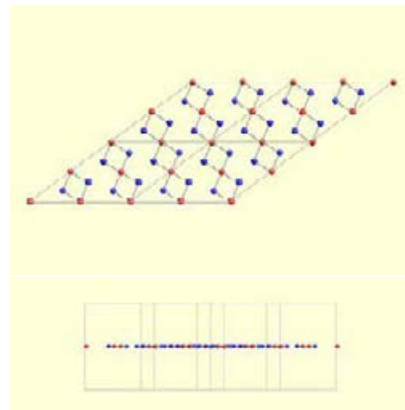

AgCl<sub>2</sub> (P)

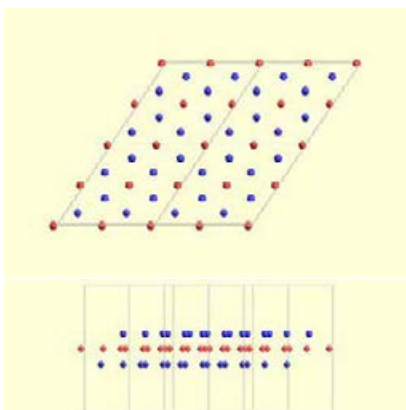

AgK<sub>2</sub> (T)

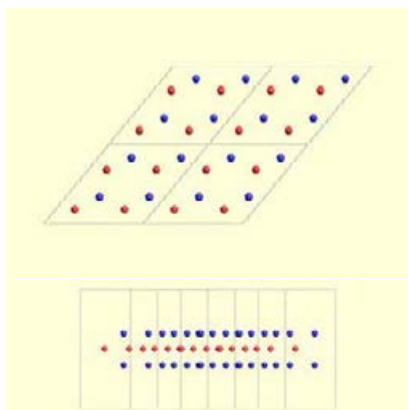

AgK<sub>2</sub> (H)

×

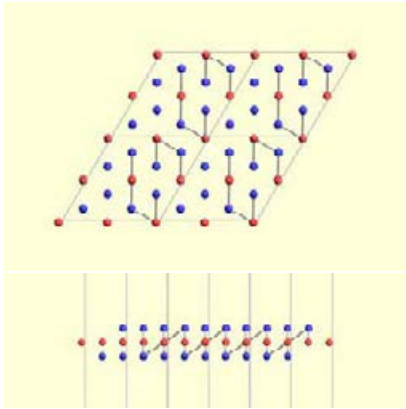

AgCa<sub>2</sub> (T)

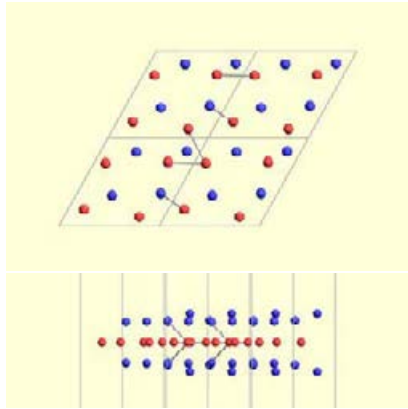

AgCa<sub>2</sub> (H)

×

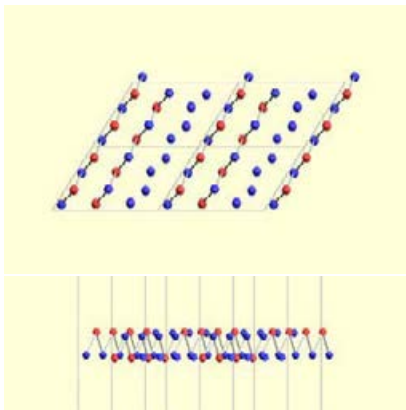

AgSc<sub>2</sub> (T)

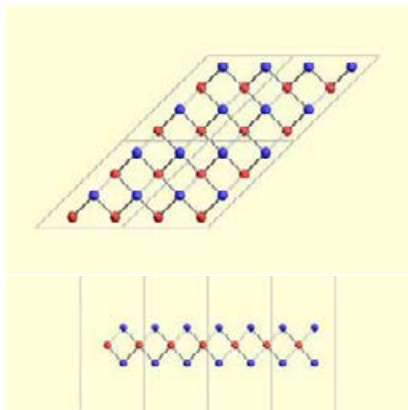

AgSc<sub>2</sub> (H)

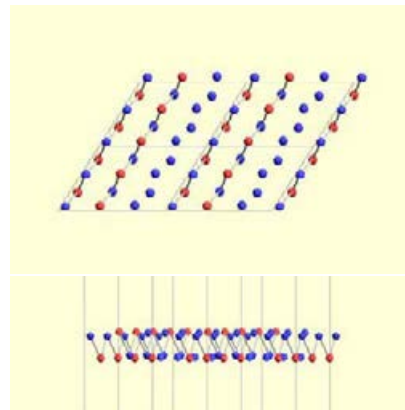

AgSc<sub>2</sub> (P)

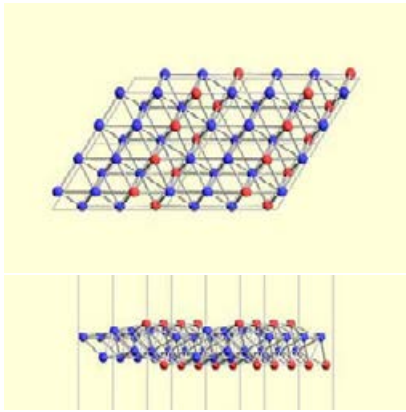

AgMn<sub>2</sub> (T)

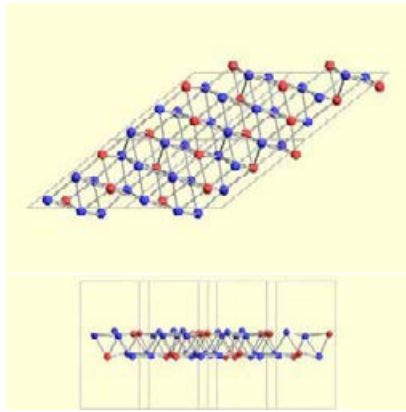

AgMn<sub>2</sub> (H)

×

×

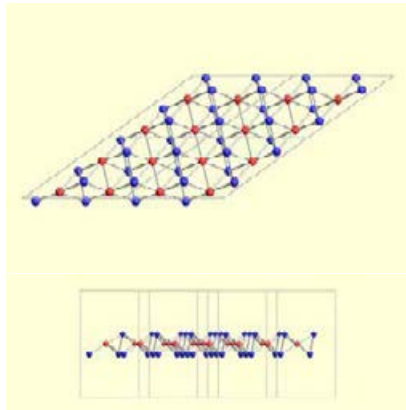

AgGe<sub>2</sub> (H)

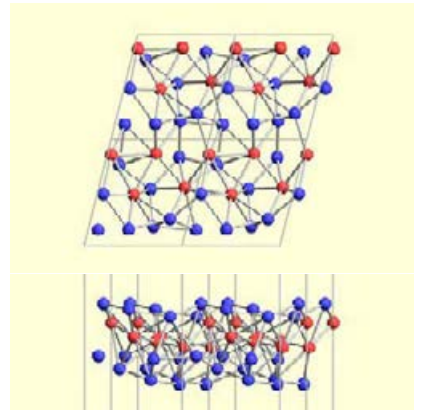

AgGe<sub>2</sub> (P)

×

×

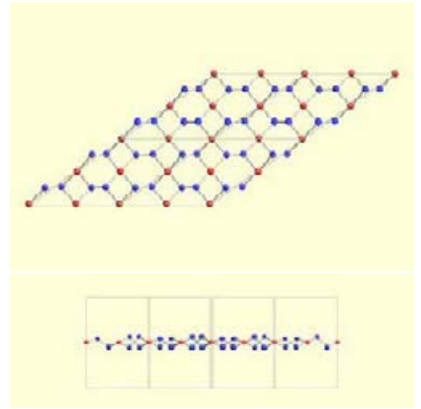

AgSe<sub>2</sub> (P)

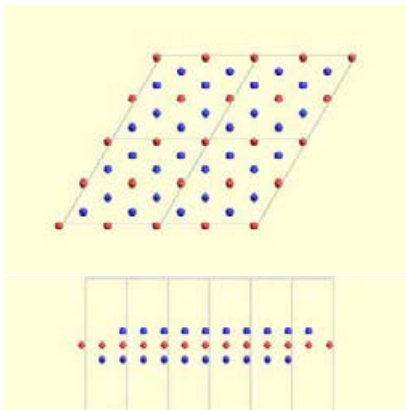

AgSr<sub>2</sub> (T)

×

×



×

×

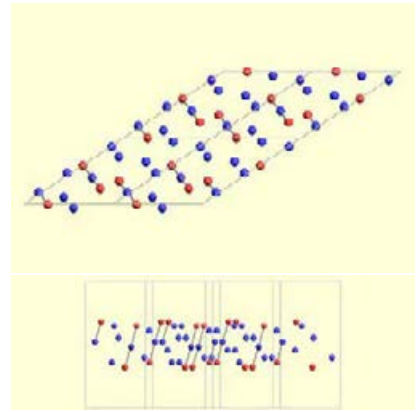

$\text{AgY}_2$  (P)

×

×

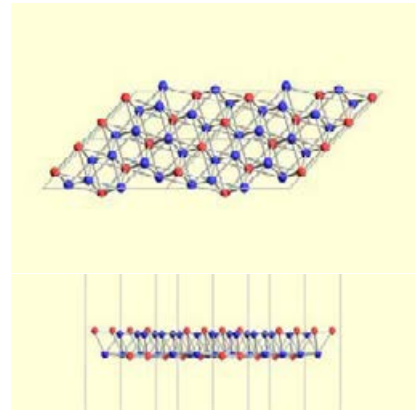

$\text{AgPd}_2$  (P)

×

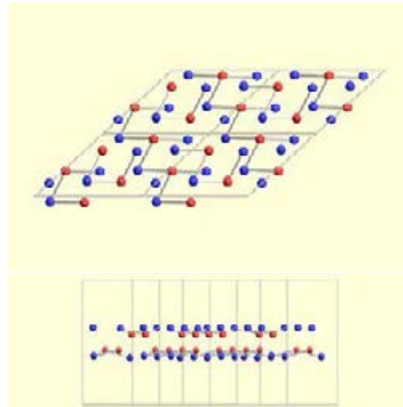

$\text{AgIn}_2$  (H)

×

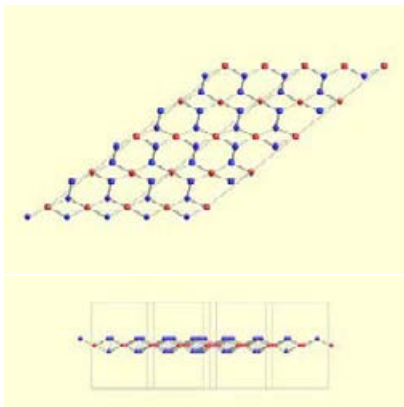

$\text{AgSb}_2$  (T)

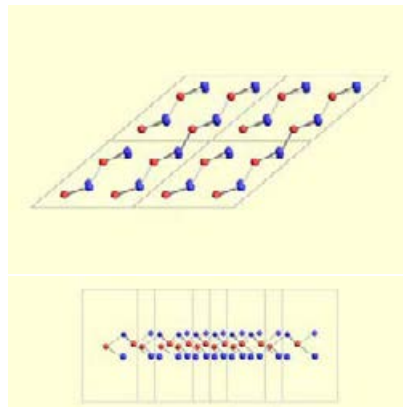

$\text{AgSb}_2$  (H)

×

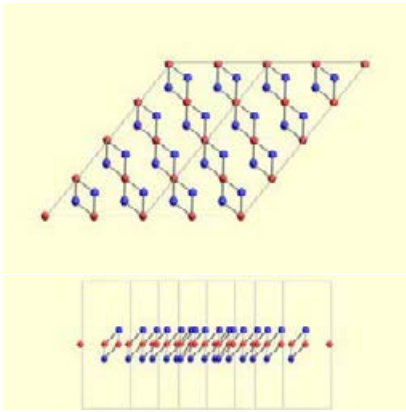

AgI<sub>2</sub> (T)

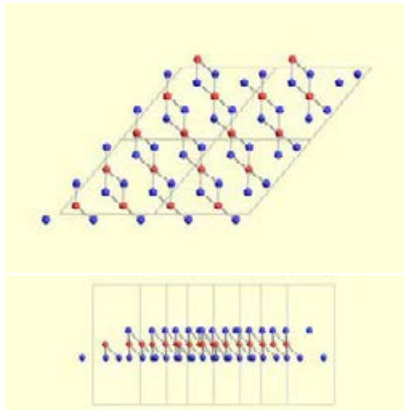

AgI<sub>2</sub> (H)

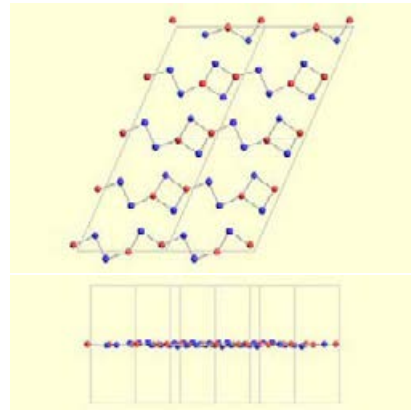

AgI<sub>2</sub> (P)

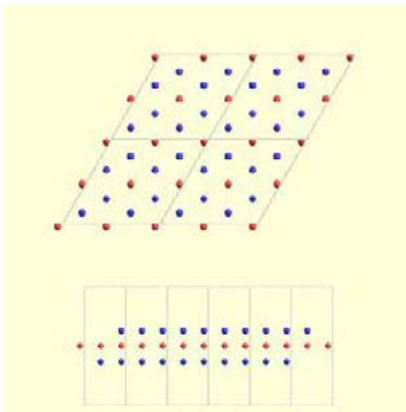

AgCs<sub>2</sub> (T)

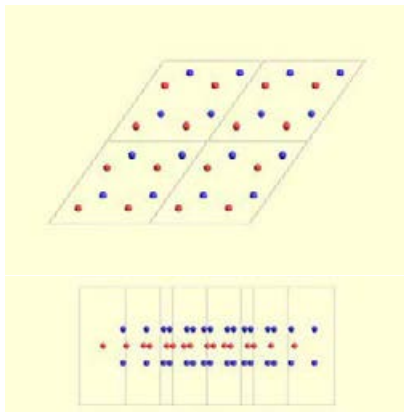

AgCs<sub>2</sub> (H)

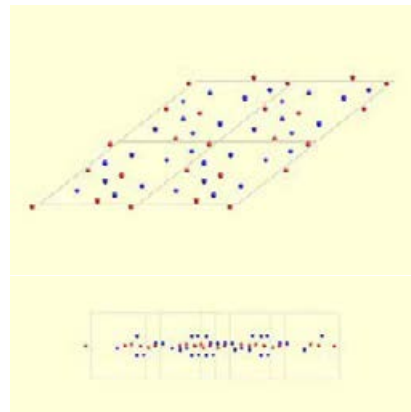

AgCs<sub>2</sub> (P)

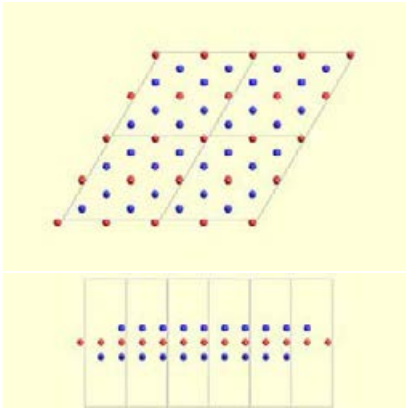

AgBa<sub>2</sub> (T)

×

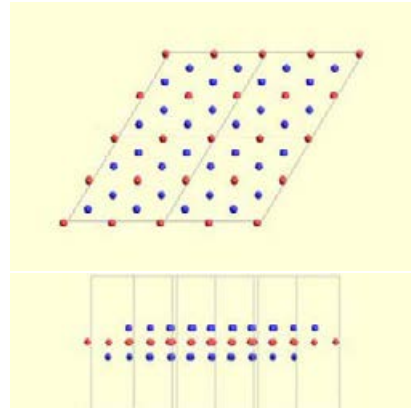

AgBa<sub>2</sub> (P)

×

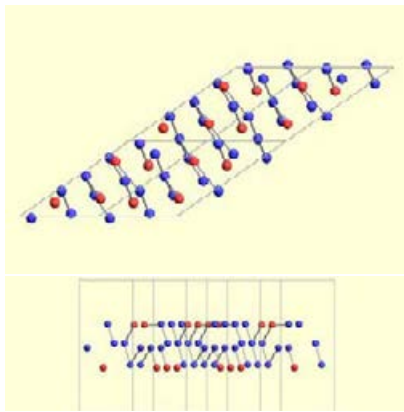

AgHf<sub>2</sub> (H)

×

×

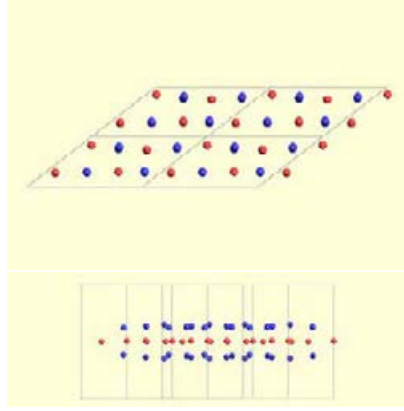

×

AgTl<sub>2</sub> (H)

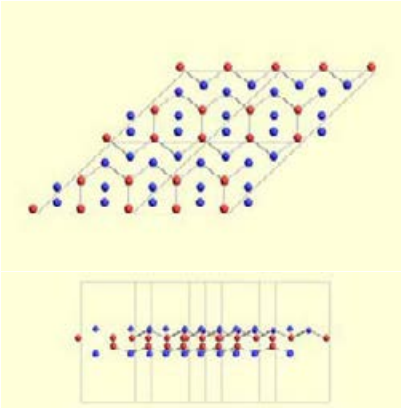

×

×

AgPb<sub>2</sub> (T)

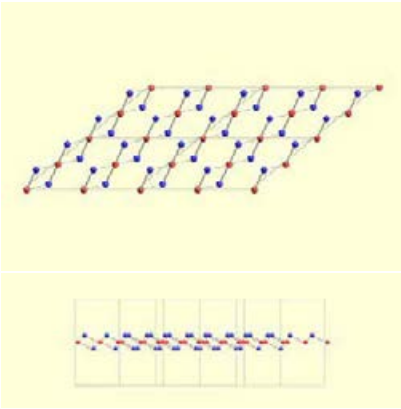

AgBi<sub>2</sub> (T)

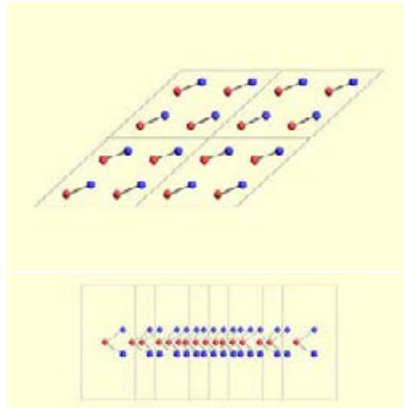

AgBi<sub>2</sub> (H)

×

×

×

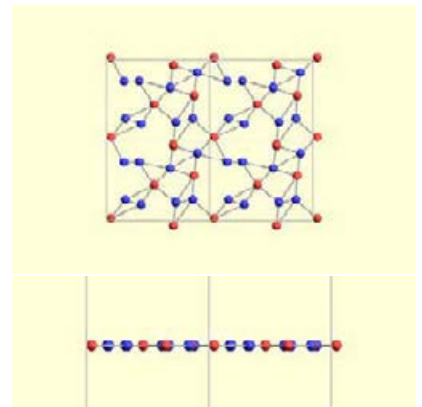

CdO<sub>2</sub> (P)

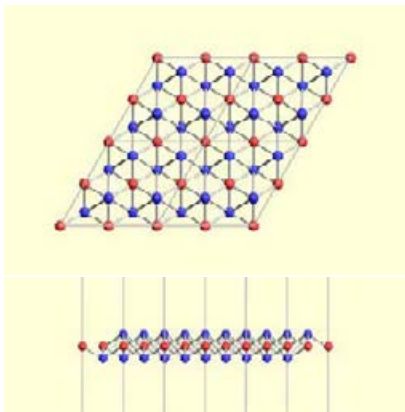

CdF<sub>2</sub> (T)

×

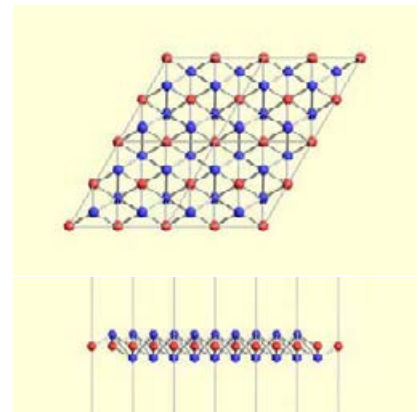

CdF<sub>2</sub> (P)

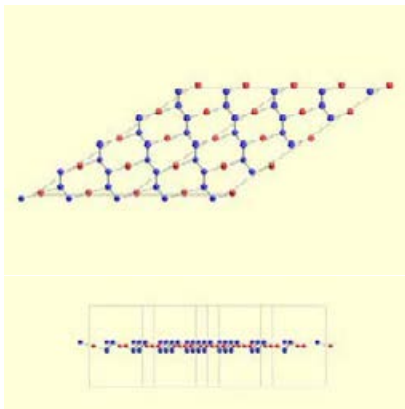

CdP<sub>2</sub> (T)

×

×

×

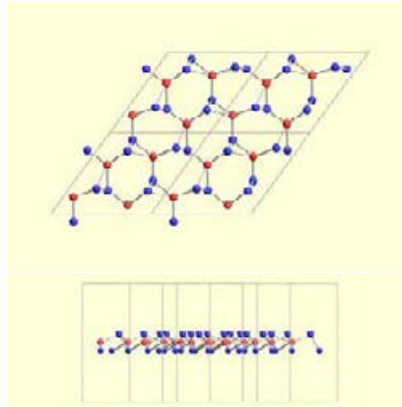

CdS<sub>2</sub> (H)

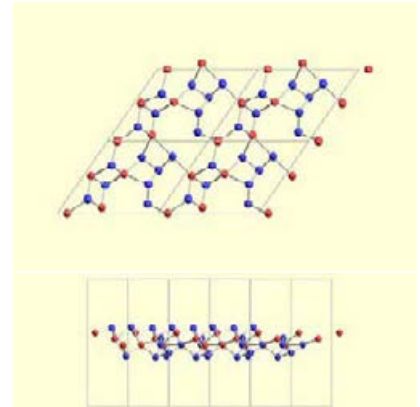

CdS<sub>2</sub> (P)

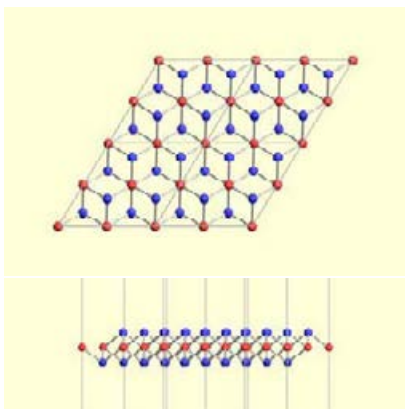

CdCl<sub>2</sub> (T)

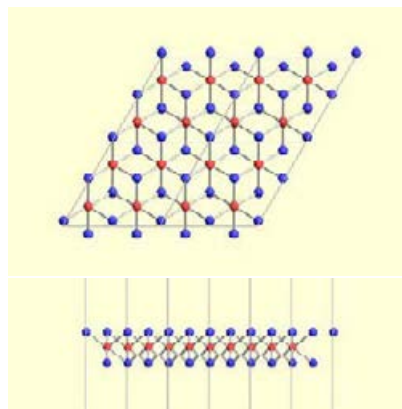

CdCl<sub>2</sub> (H)

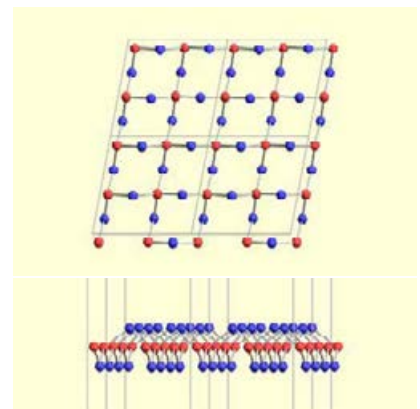

CdCl<sub>2</sub> (P)

×

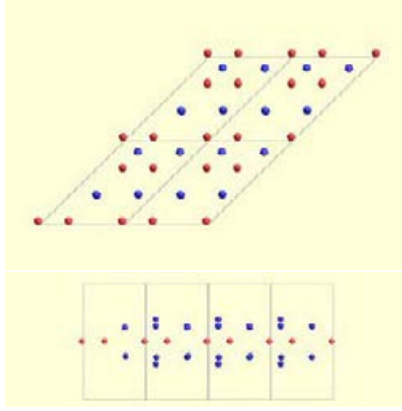

CdK<sub>2</sub> (H)

×

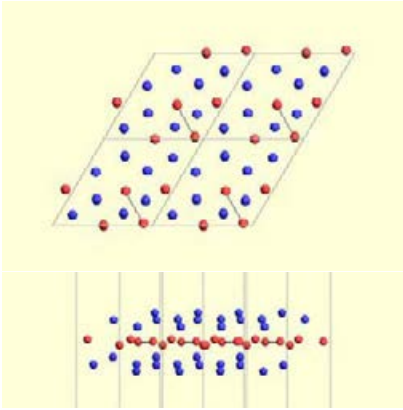

CdCa<sub>2</sub> (T)

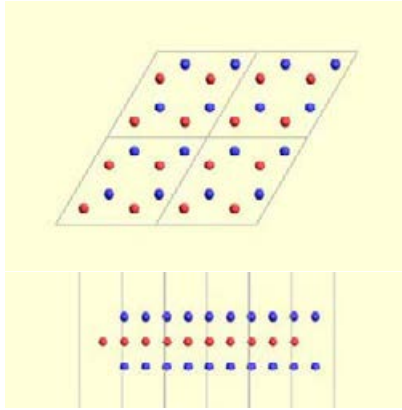

CdCa<sub>2</sub> (H)

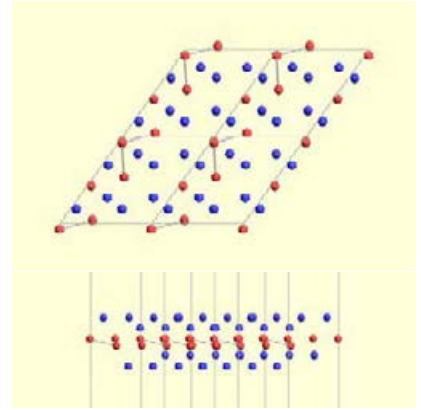

CdCa<sub>2</sub> (P)

×

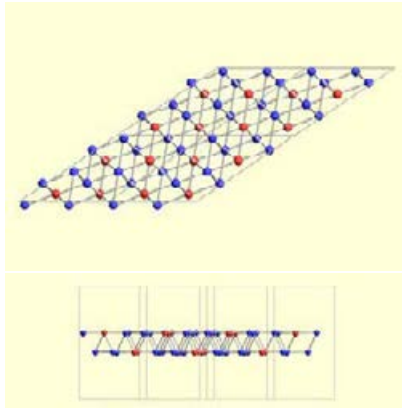

CdCr<sub>2</sub> (H)

×

×

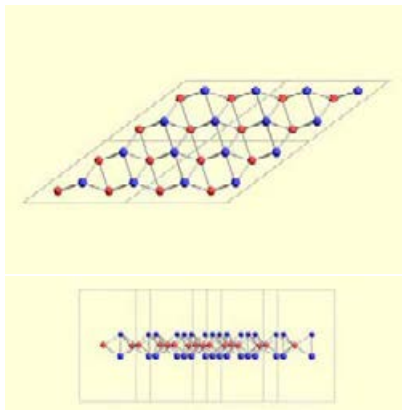

CdGe<sub>2</sub> (H)

×



×

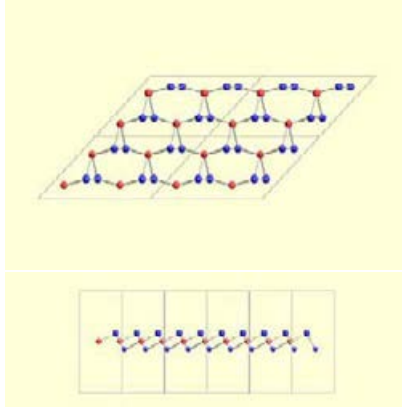

CdSe<sub>2</sub> (H)

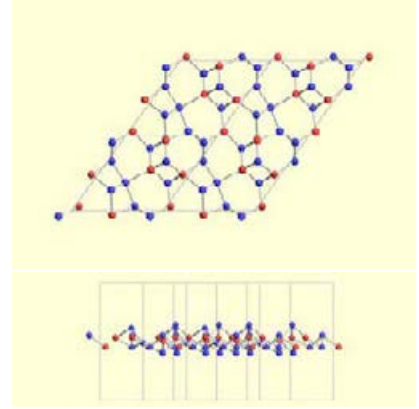

CdSe<sub>2</sub> (P)

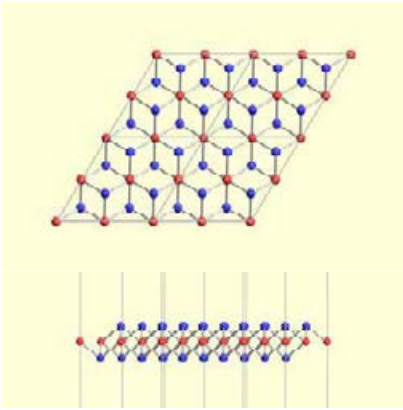

CdBr<sub>2</sub> (T)

×

×

×

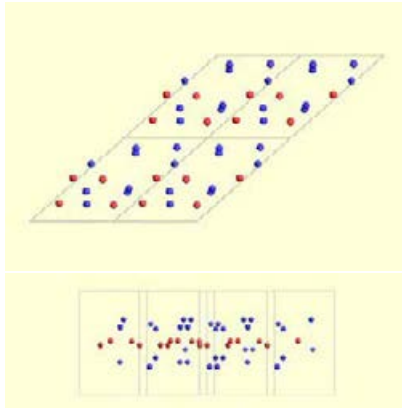

CdRb<sub>2</sub> (H)

×

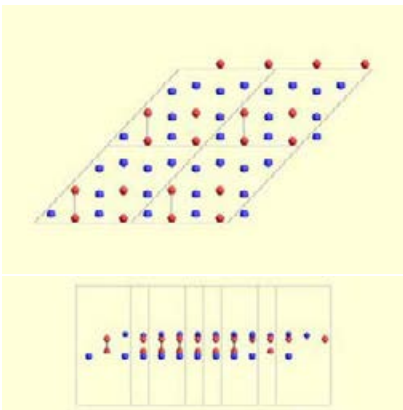

CdY<sub>2</sub> (T)

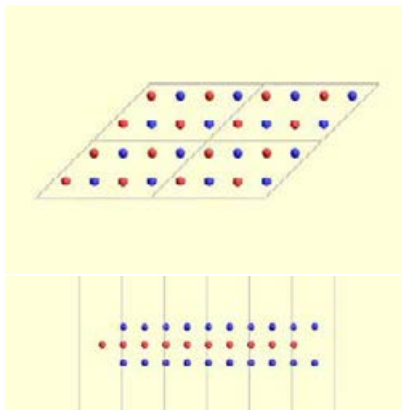

CdY<sub>2</sub> (H)

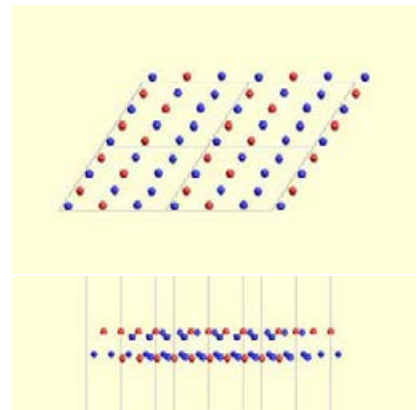

CdY<sub>2</sub> (P)

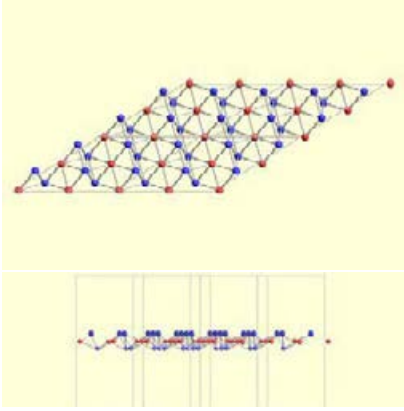

CdPd<sub>2</sub> (T)

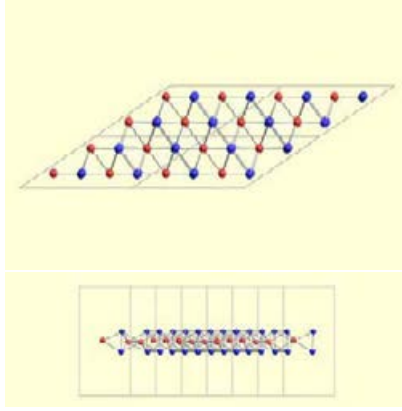

CdPd<sub>2</sub> (H)

×

×

×

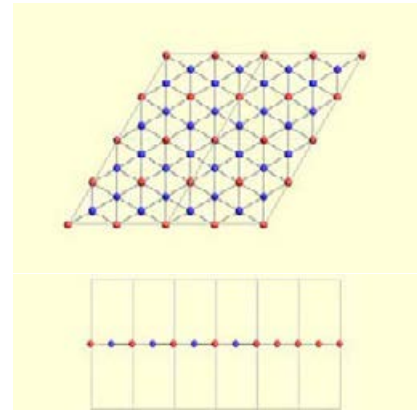

CdAg<sub>2</sub> (P)

×

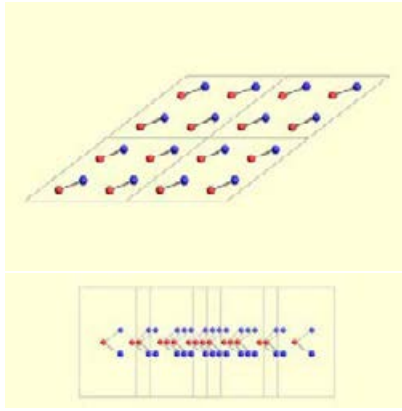

CdSn<sub>2</sub> (H)

×

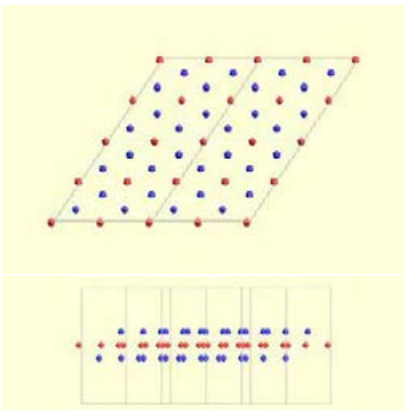

CdBa<sub>2</sub> (T)

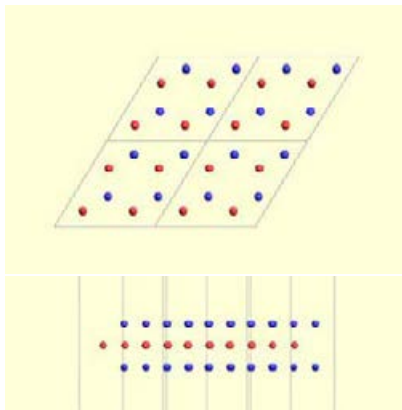

CdBa<sub>2</sub> (H)

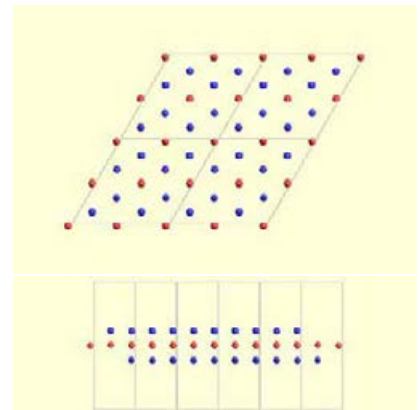

CdBa<sub>2</sub> (P)

×

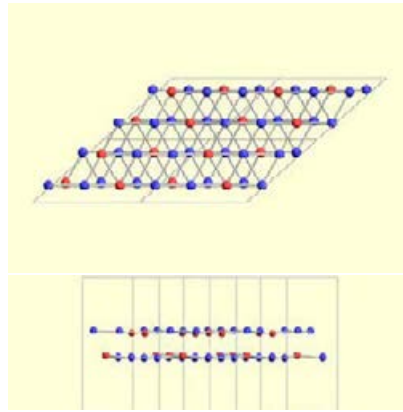

×

CdAu<sub>2</sub> (H)

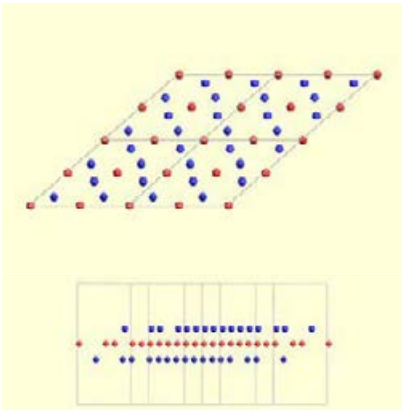

CdTl<sub>2</sub> (T)

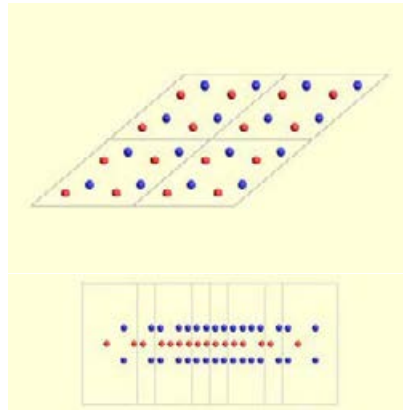

CdTl<sub>2</sub> (H)

×

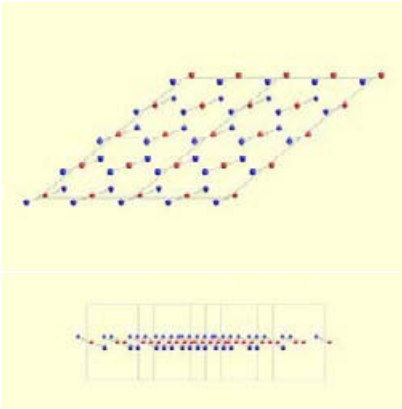

CdBi<sub>2</sub> (T)

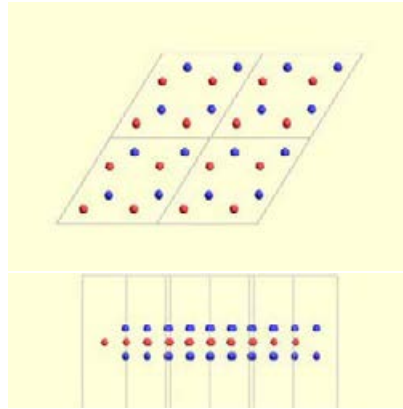

CdBi<sub>2</sub> (H)

×

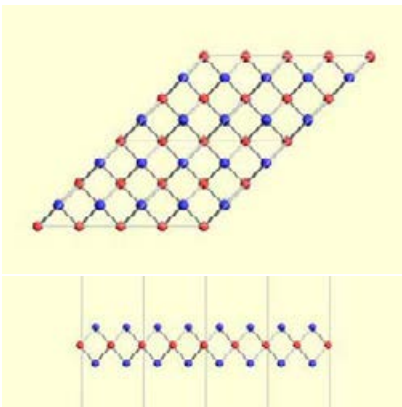

InLi<sub>2</sub> (T)

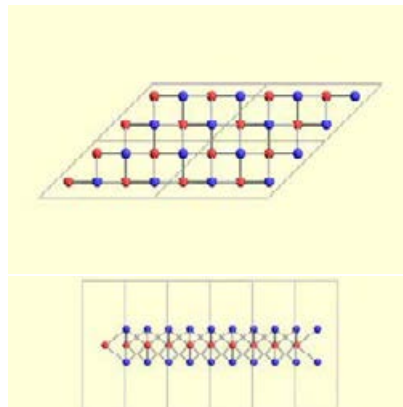

InLi<sub>2</sub> (H)

×

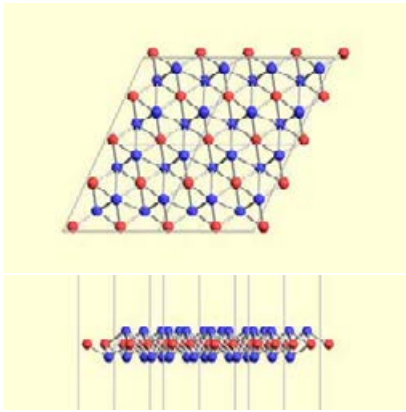

InO<sub>2</sub> (T)

×

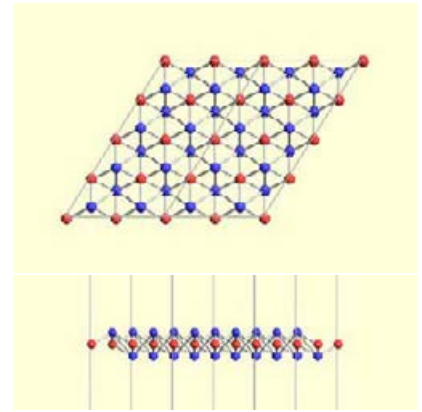

InO<sub>2</sub> (P)

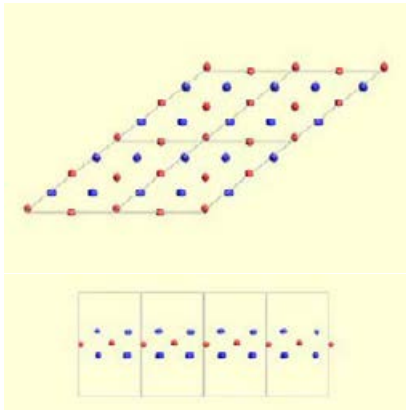

InNa<sub>2</sub> (T)

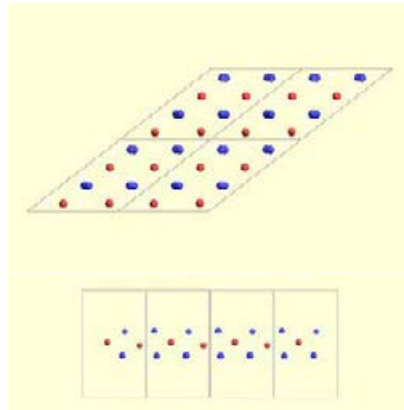

InNa<sub>2</sub> (H)

×

×

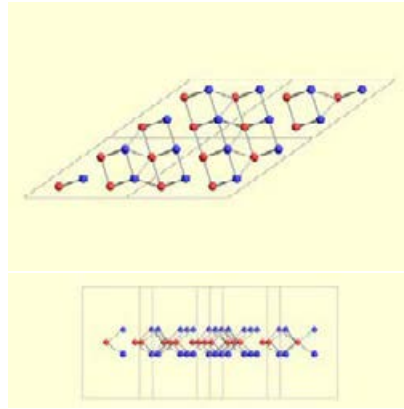

InAl<sub>2</sub> (H)

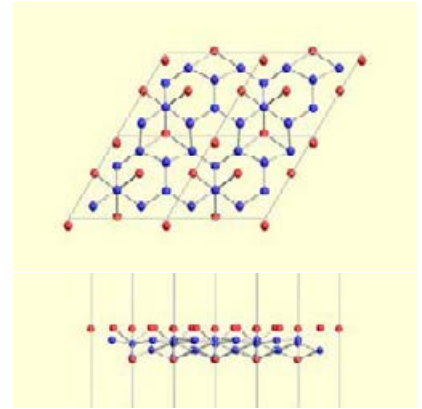

InAl<sub>2</sub> (P)

×

×

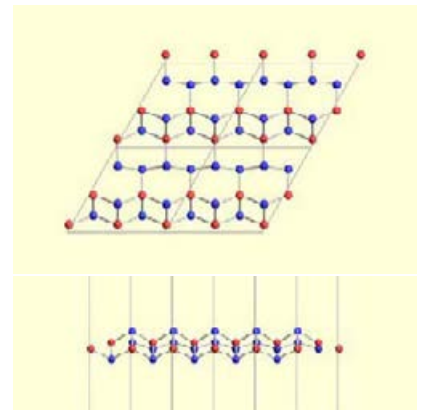

InS<sub>2</sub> (P)

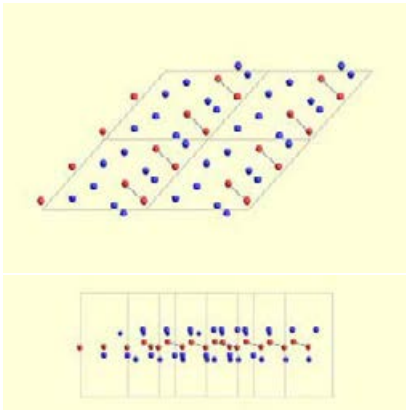

InK<sub>2</sub> (T)

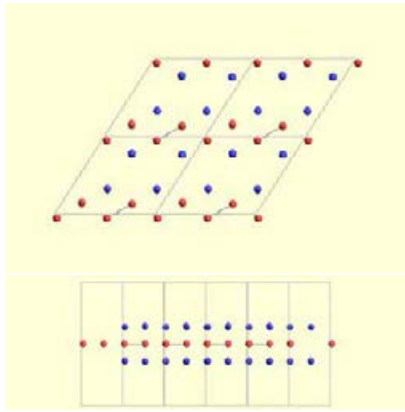

InK<sub>2</sub> (H)

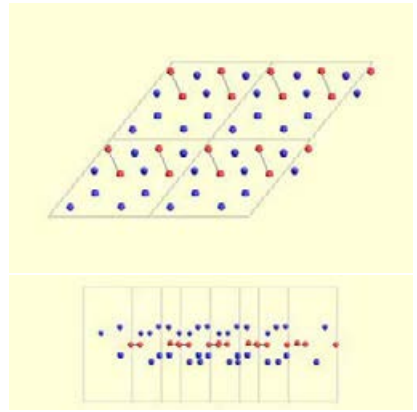

InK<sub>2</sub> (P)

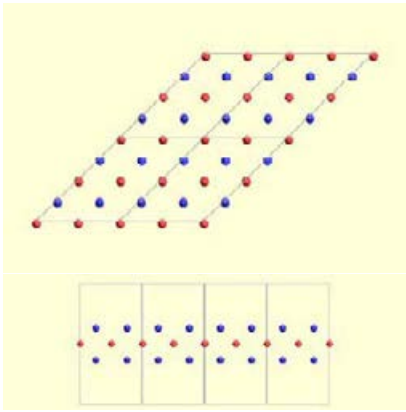

InCa<sub>2</sub> (T)

×

×

×

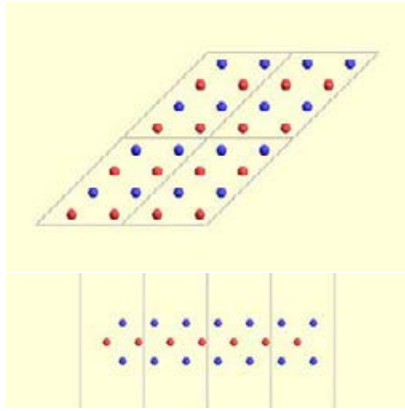

InSc<sub>2</sub> (H)

×

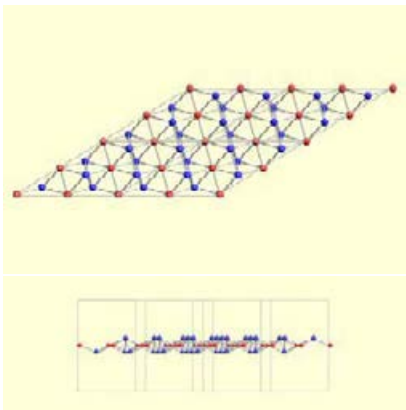

InTi<sub>2</sub> (T)

×

×



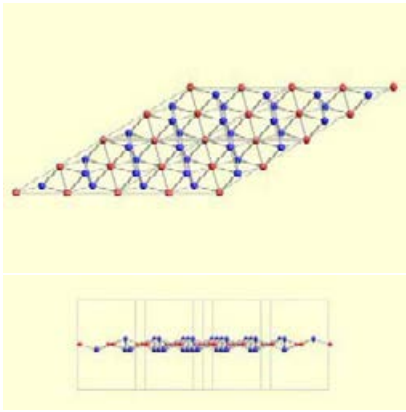

InV<sub>2</sub> (T)

×

×

×

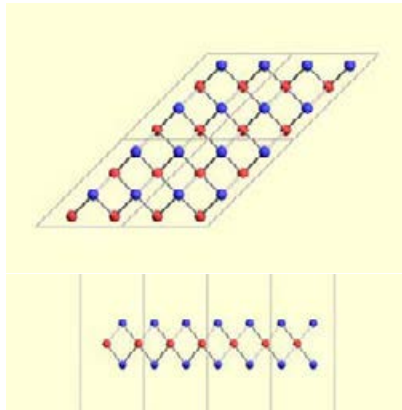

InCr<sub>2</sub> (H)

×

×

×

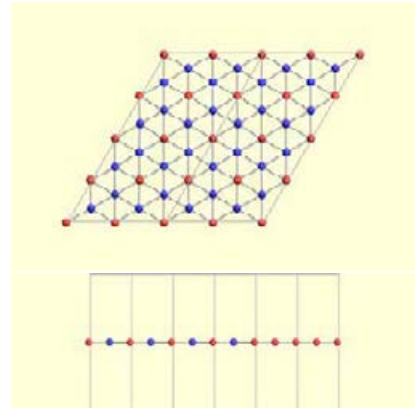

InMn<sub>2</sub> (P)

×

×

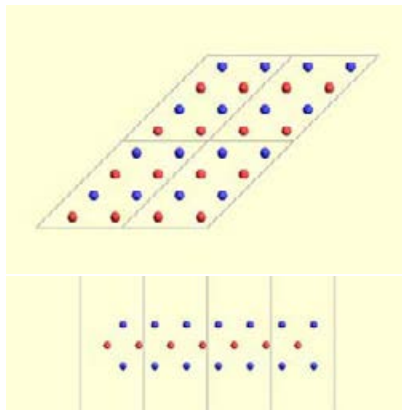

InY<sub>2</sub> (H)

×

×

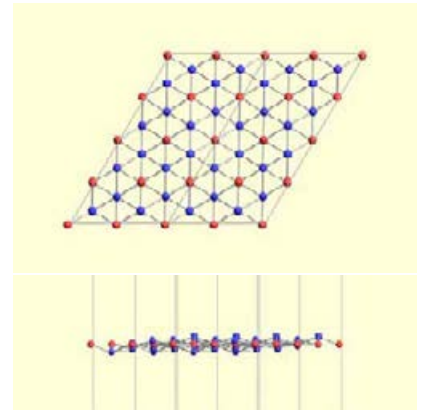

InPd<sub>2</sub> (P)

×

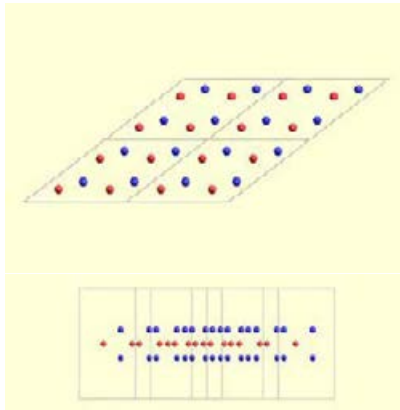

InIn<sub>2</sub> (H)

×

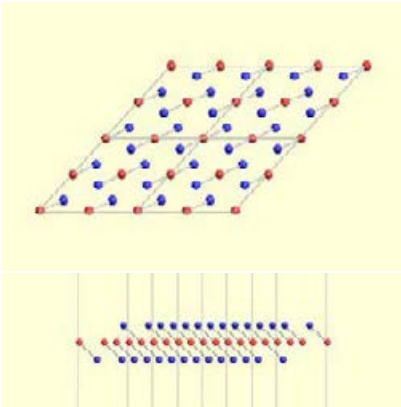

InTe<sub>2</sub> (T)

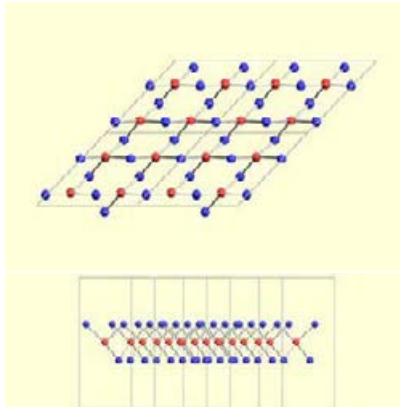

InTe<sub>2</sub> (H)

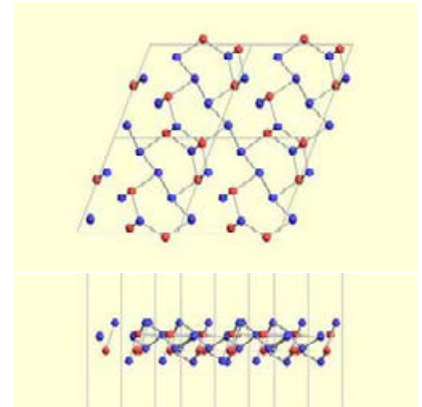

InTe<sub>2</sub> (P)

×

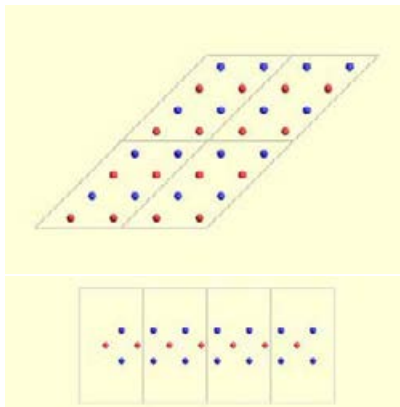

InBa<sub>2</sub> (H)

×

×

×

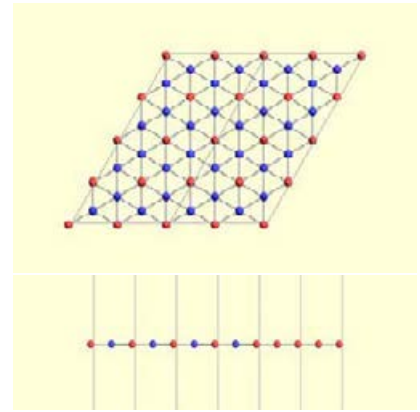

InOs<sub>2</sub> (P)

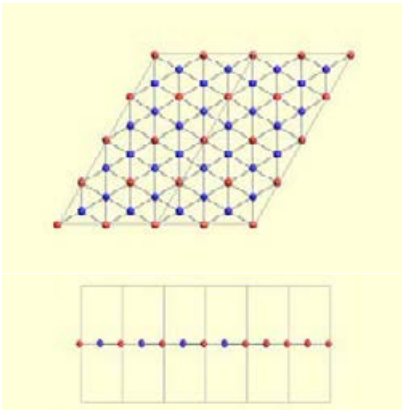

InAu<sub>2</sub> (T)

×

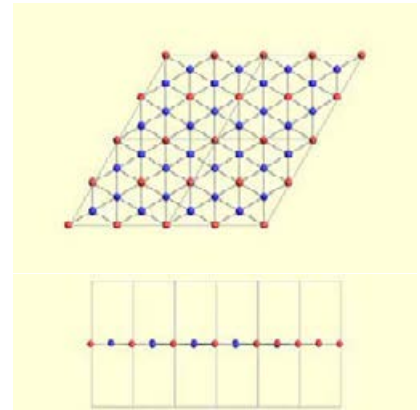

InAu<sub>2</sub> (P)

×

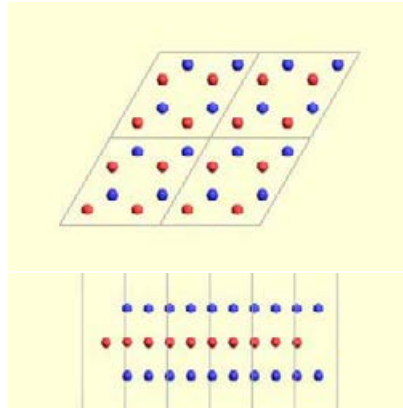

InTl<sub>2</sub> (H)

×

×

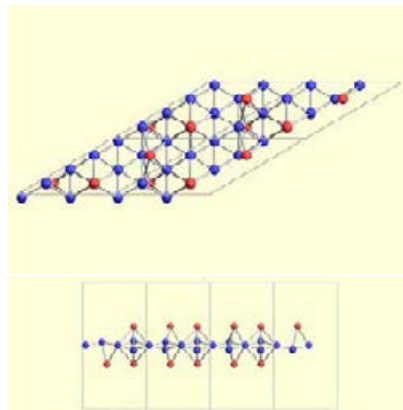

SnBe<sub>2</sub> (H)

×

×

×

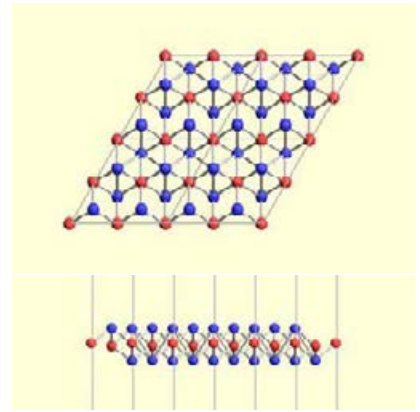

SnO<sub>2</sub> (P)

×

×

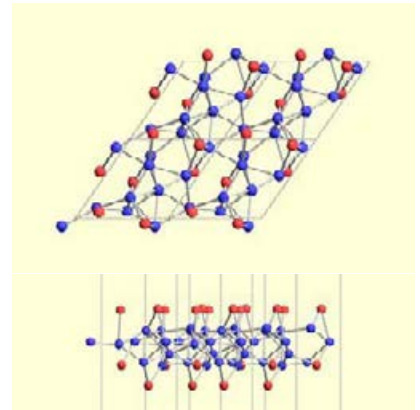

SnAl<sub>2</sub> (P)

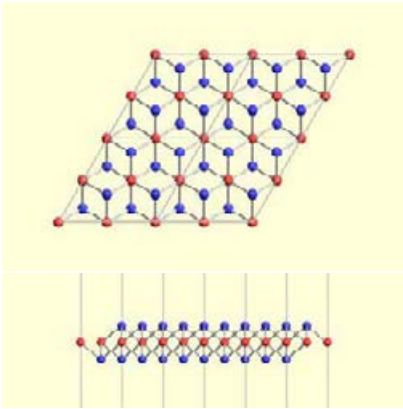

SnS<sub>2</sub> (T)

×

×

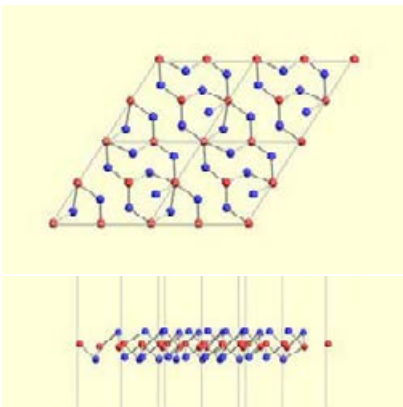

SnCl<sub>2</sub> (T)

×

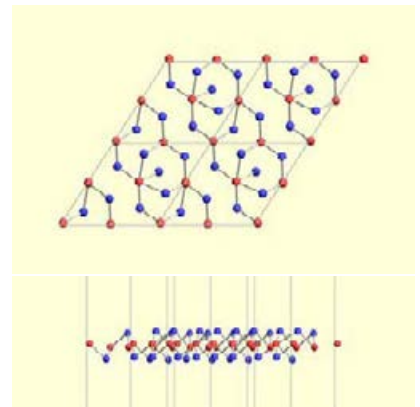

SnCl<sub>2</sub> (P)

×

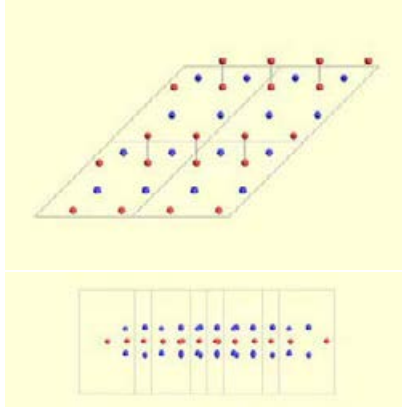

×

SnK<sub>2</sub> (H)

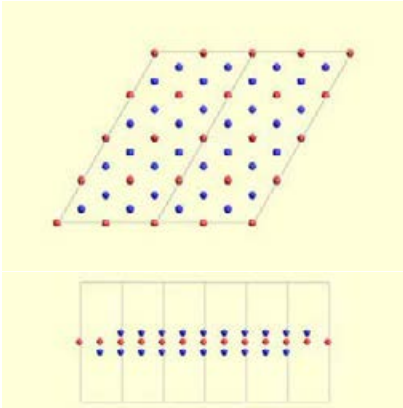

SnCa<sub>2</sub> (T)

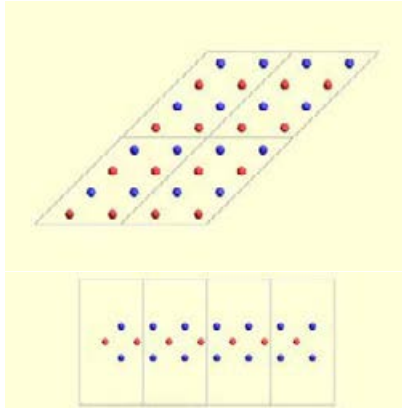

SnCa<sub>2</sub> (H)

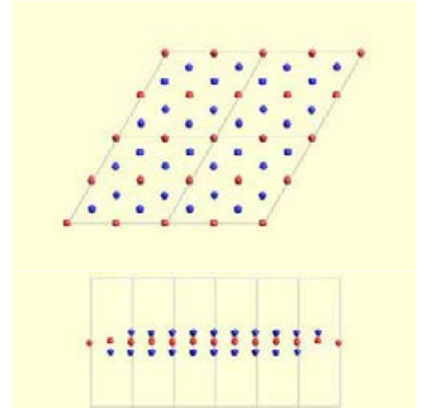

SnCa<sub>2</sub> (P)

×

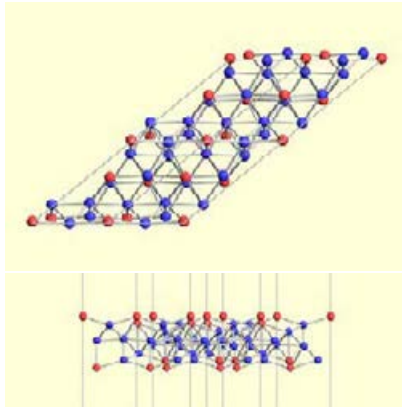

SnV<sub>2</sub> (H)

×

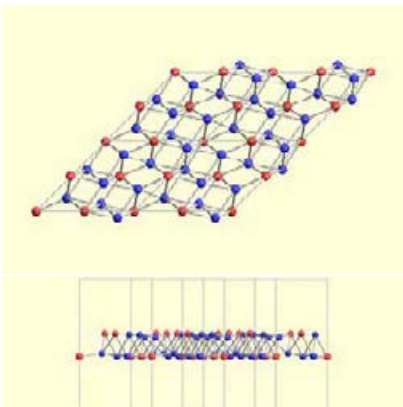

SnCr<sub>2</sub> (T)

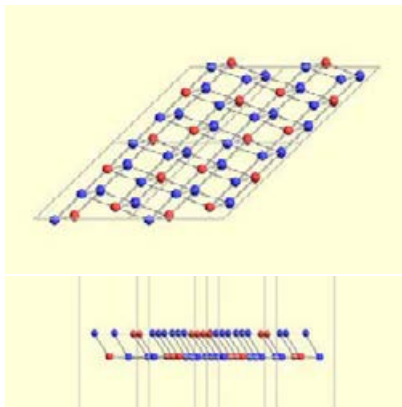

SnCr<sub>2</sub> (H)

×



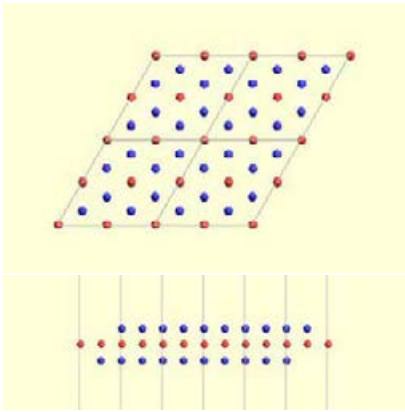

$\text{SnBr}_2$  (T)

×

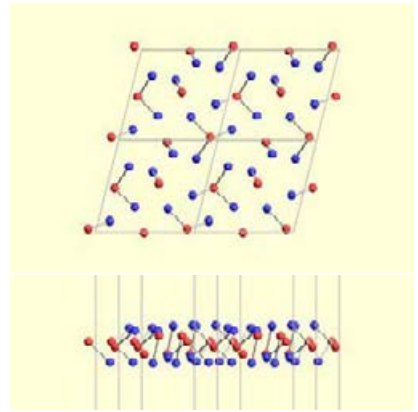

$\text{SnBr}_2$  (P)

×

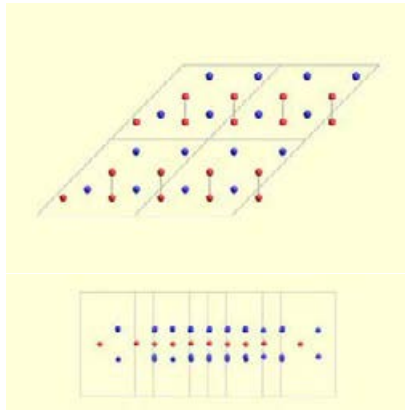

$\text{SnRb}_2$  (H)

×

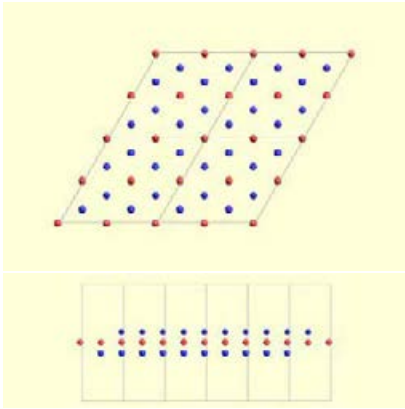

$\text{SnSr}_2$  (T)

×

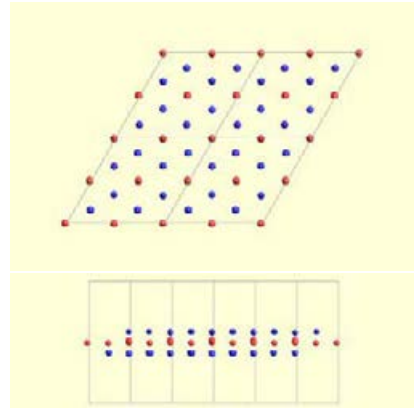

$\text{SnSr}_2$  (P)

×

×

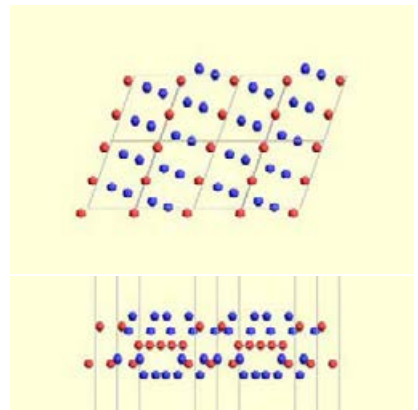

$\text{SnY}_2$  (P)

×

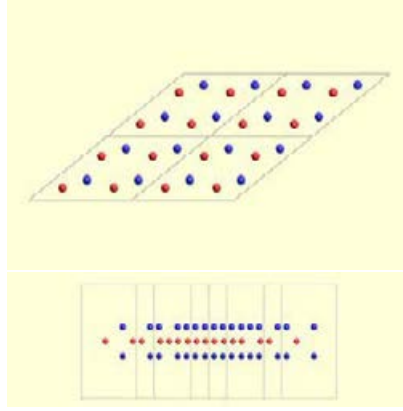

SnIn<sub>2</sub> (H)

×

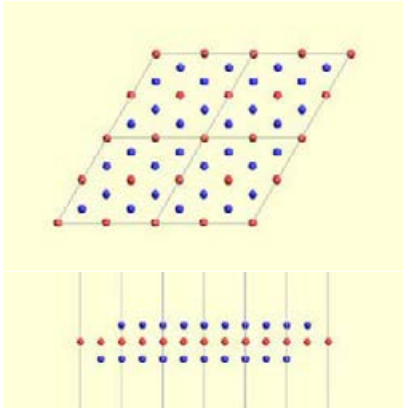

SnI<sub>2</sub> (T)

×

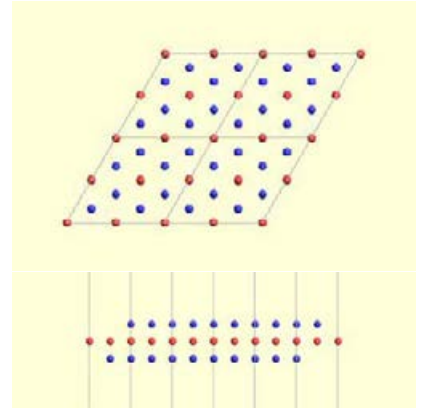

SnI<sub>2</sub> (P)

×

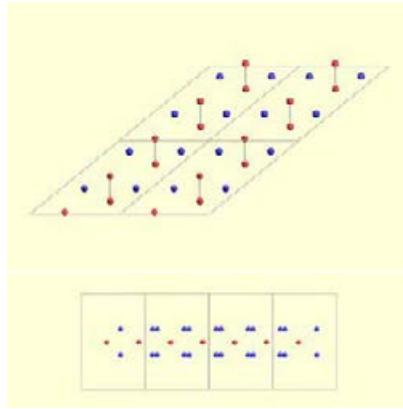

SnCs<sub>2</sub> (H)

×

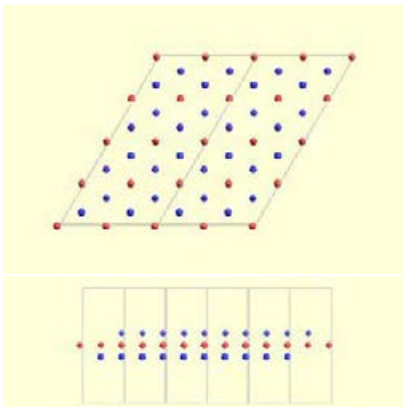

SnBa<sub>2</sub> (T)

×

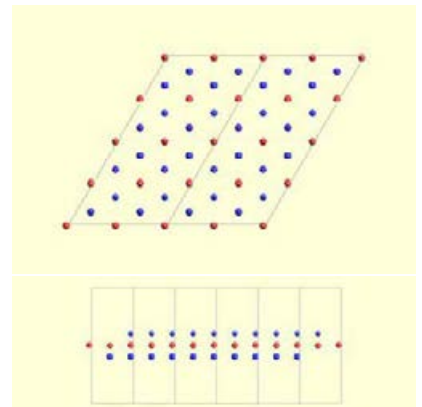

SnBa<sub>2</sub> (P)

×

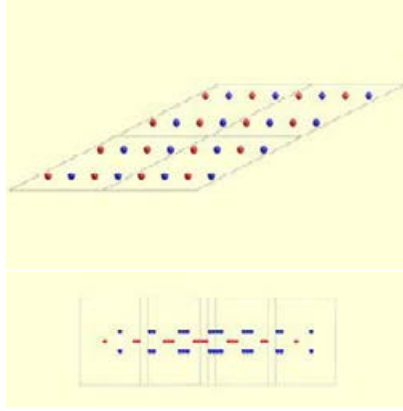

SnHg<sub>2</sub> (H)

×

×

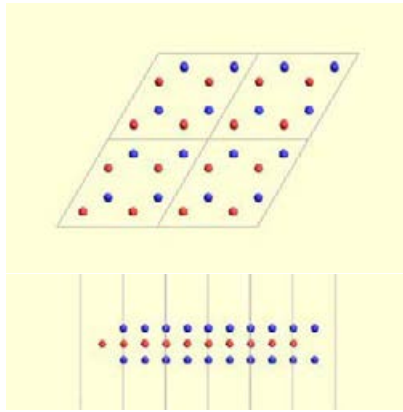

SnPb<sub>2</sub> (H)

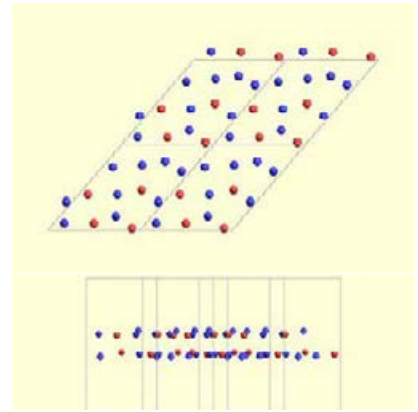

SnPb<sub>2</sub> (P)

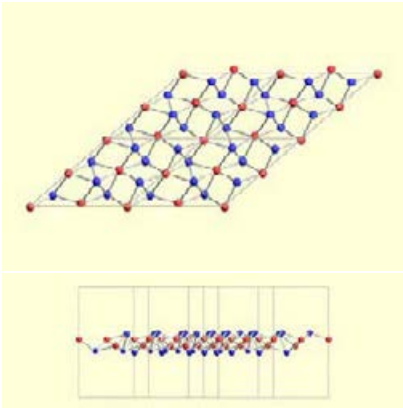

SbLi<sub>2</sub> (T)

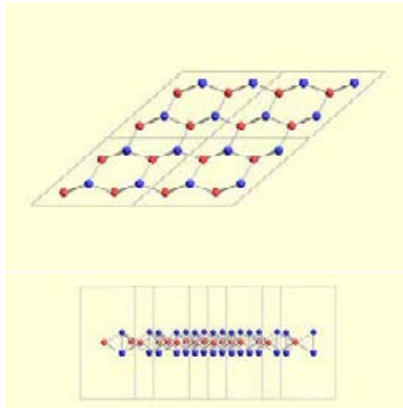

SbLi<sub>2</sub> (H)

×

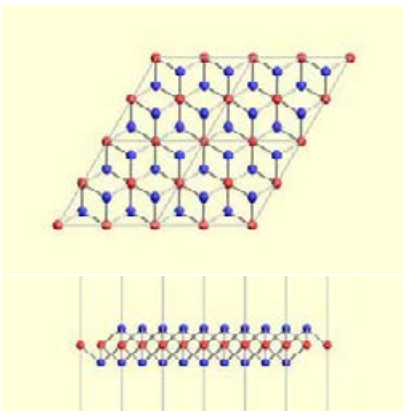

SbS<sub>2</sub> (T)

×

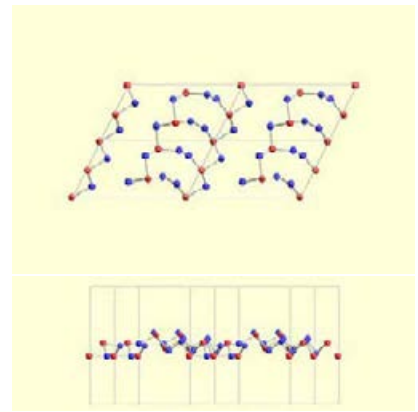

SbS<sub>2</sub> (P)

×

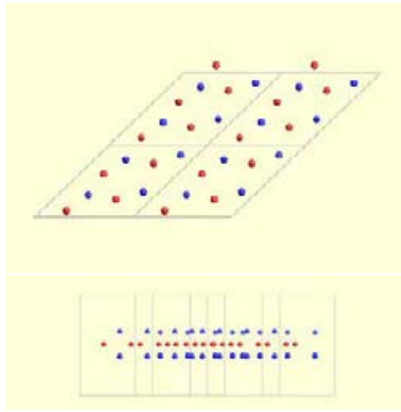

$\text{SbK}_2$  (H)

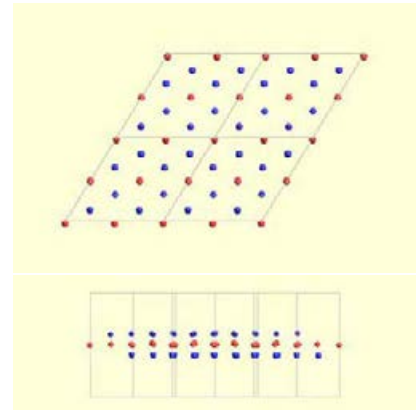

$\text{SbK}_2$  (P)

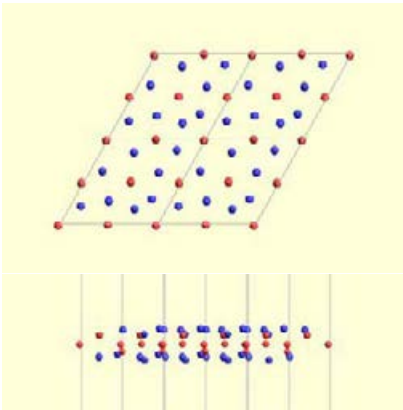

$\text{SbCa}_2$  (T)

×

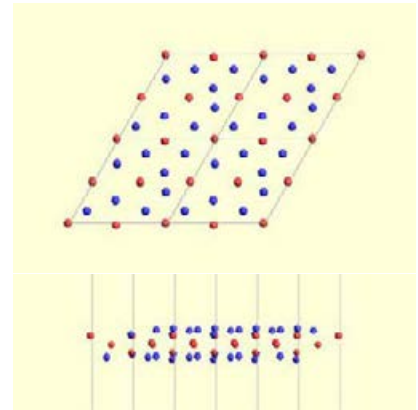

$\text{SbCa}_2$  (P)

×

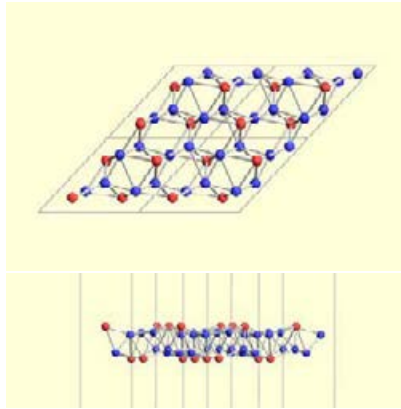

$\text{SbV}_2$  (H)

×

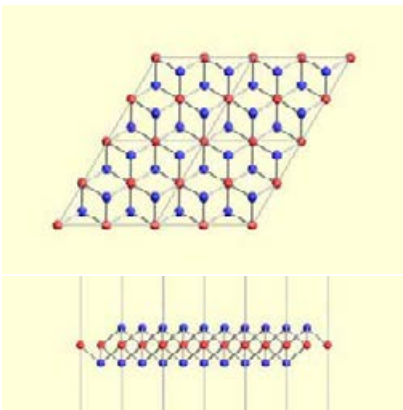

$\text{SbSe}_2$  (T)

×

×

×

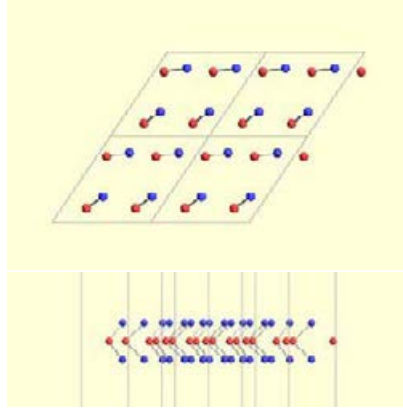

$\text{SbBr}_2$  (H)

×

×

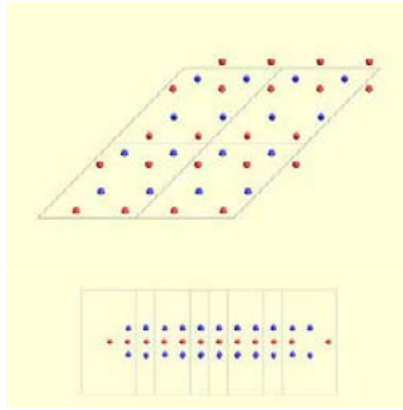

$\text{SbRb}_2$  (H)

×

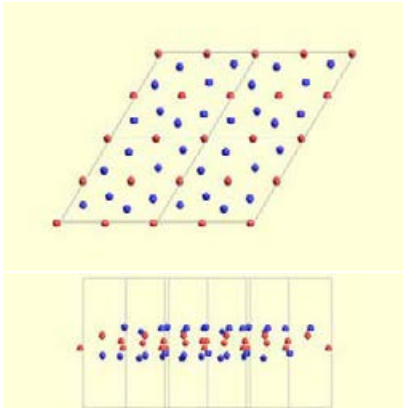

$\text{SbSr}_2$  (T)

×

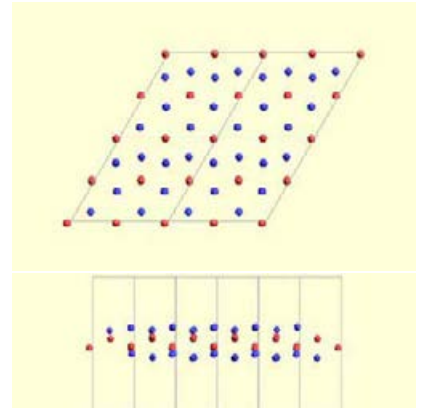

$\text{SbSr}_2$  (P)

×

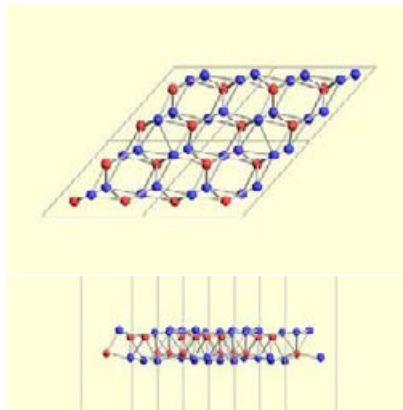

$\text{SbPd}_2$  (H)

×



×

×

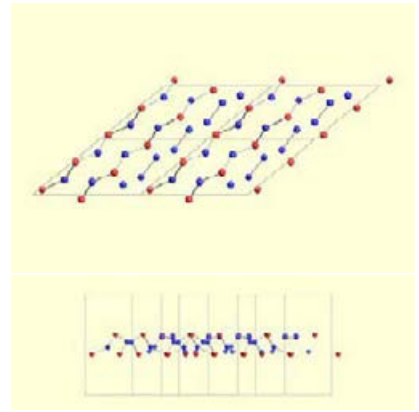

SbCd<sub>2</sub> (P)

×

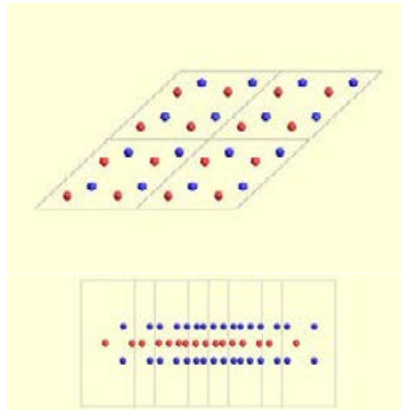

SbIn<sub>2</sub> (H)

×

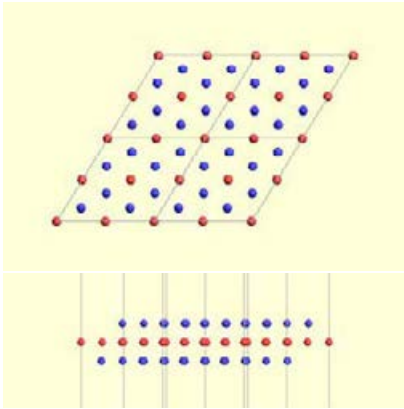

SbTe<sub>2</sub> (T)

×

×

×

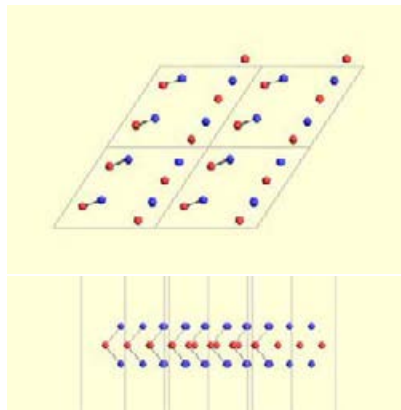

SbI<sub>2</sub> (H)

×

×

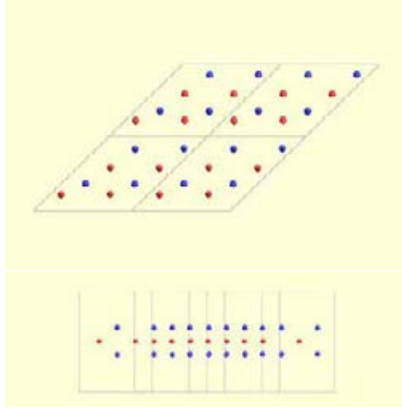

SbCs<sub>2</sub> (H)

×

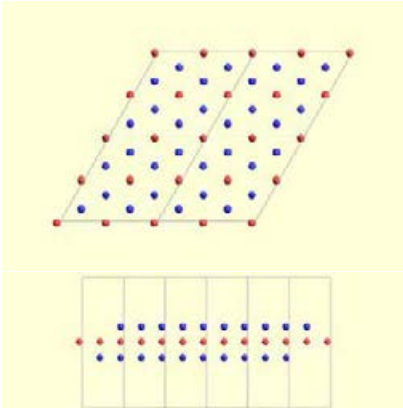

SbBa<sub>2</sub> (T)

×

×

×

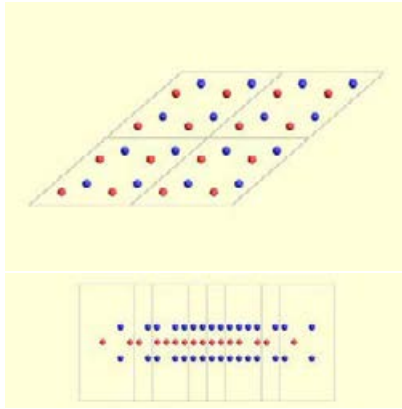

SbTl<sub>2</sub> (H)

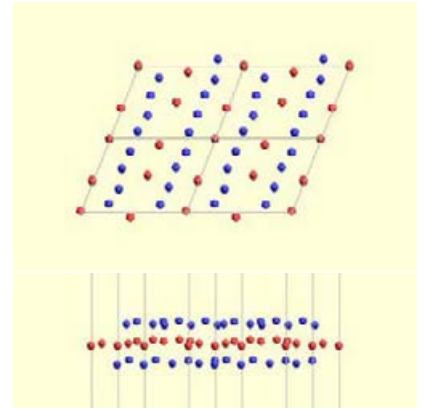

SbTl<sub>2</sub> (P)

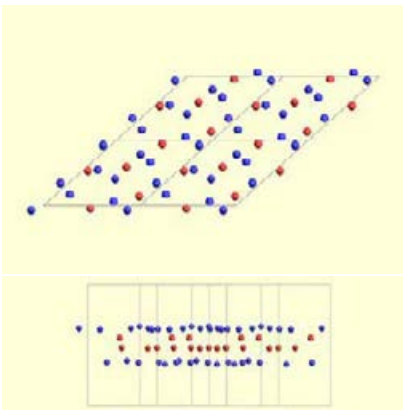

SbBi<sub>2</sub> (T)

×

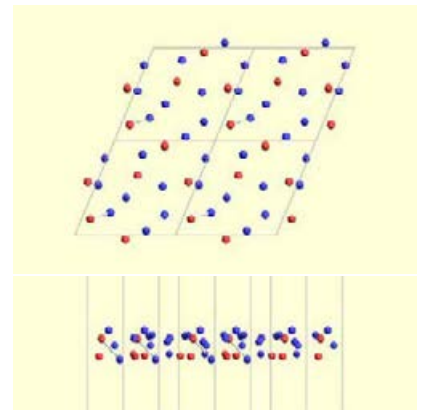

SbBi<sub>2</sub> (P)

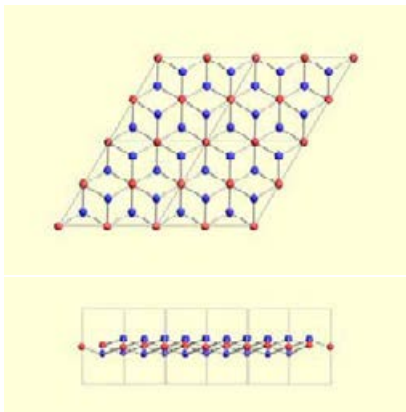

TeLi<sub>2</sub> (T)

×

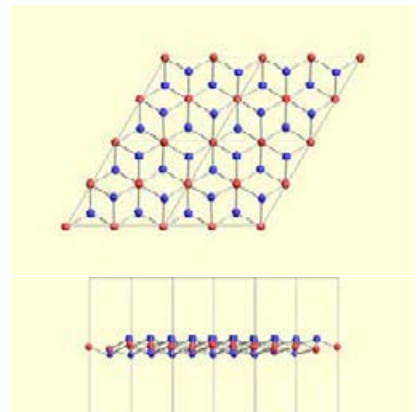

TeLi<sub>2</sub> (P)

×

×

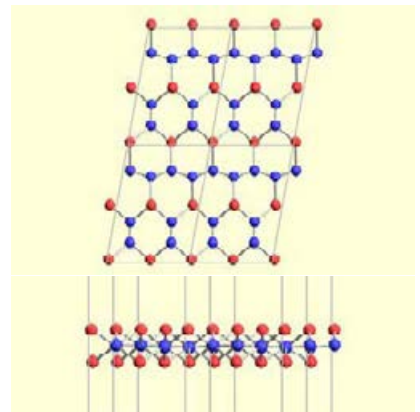

TeB<sub>2</sub> (P)

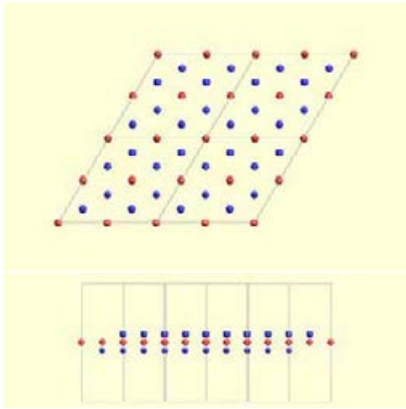

TeNa<sub>2</sub> (T)

×

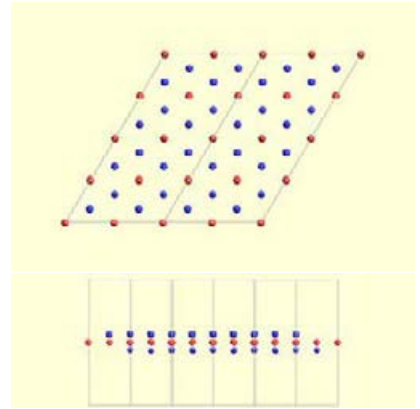

TeNa<sub>2</sub> (P)

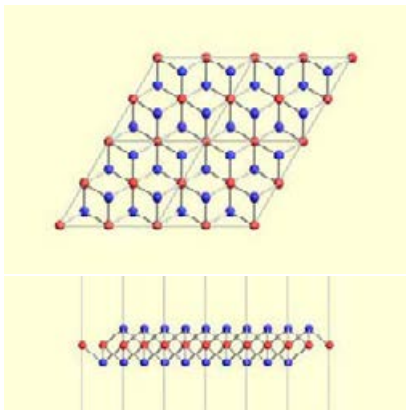

TeS<sub>2</sub> (T)

×

×

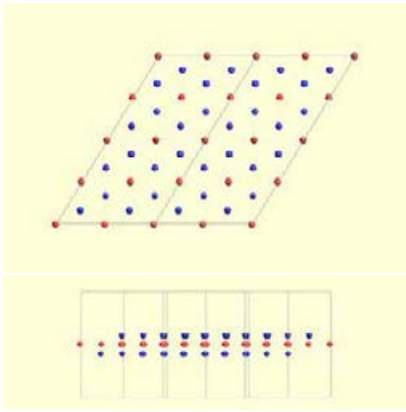

TeK<sub>2</sub> (T)

×

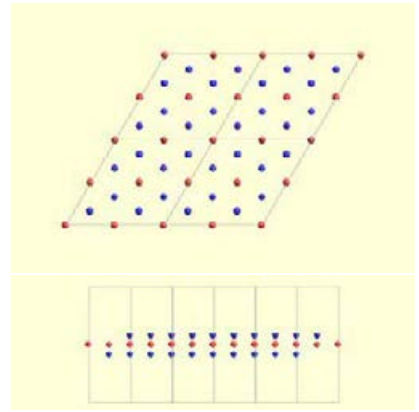

TeK<sub>2</sub> (P)

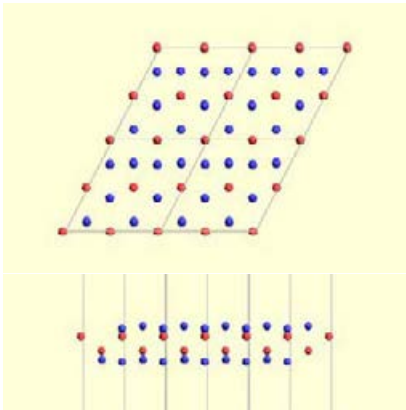

TeCa<sub>2</sub> (T)

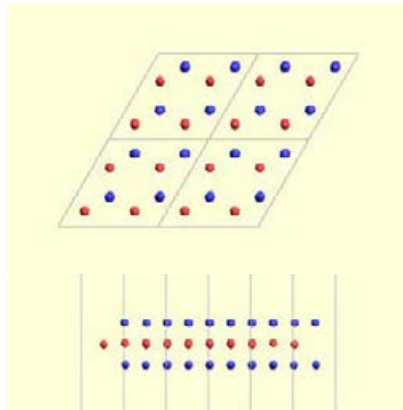

TeCa<sub>2</sub> (H)

×

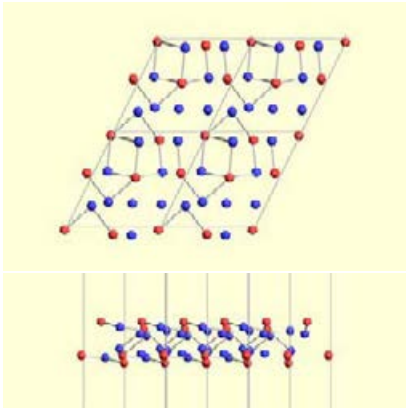

TeSe<sub>2</sub> (T)

×

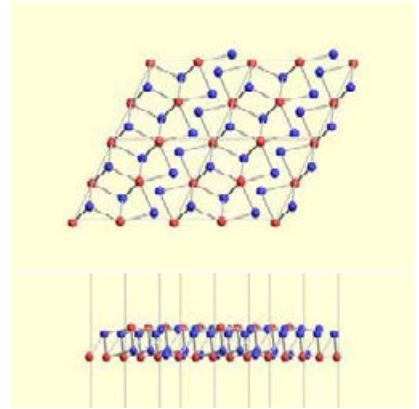

TeSe<sub>2</sub> (P)

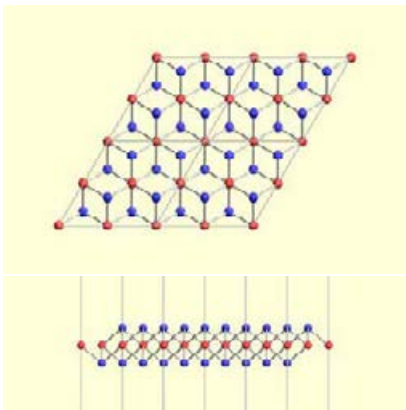

TeSe<sub>2</sub> (T)

×

×

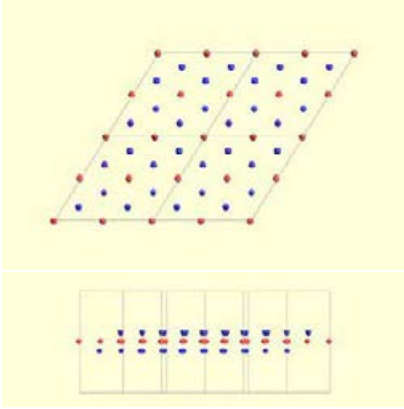

TeRb<sub>2</sub> (T)

×

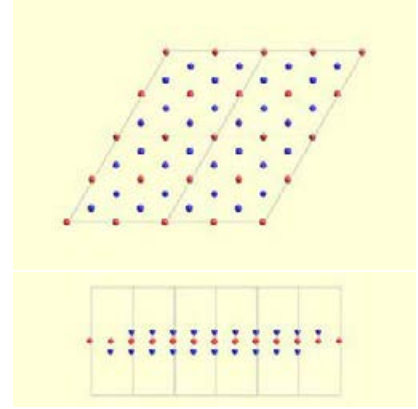

TeRb<sub>2</sub> (P)

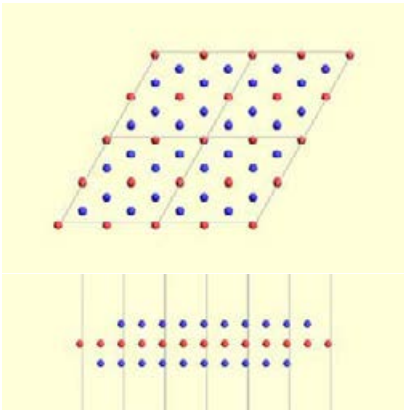

TeSr<sub>2</sub> (T)

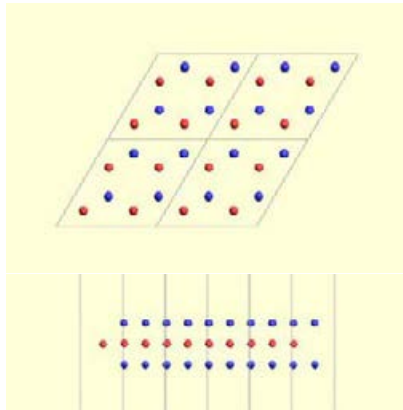

TeSr<sub>2</sub> (H)

×

×

×

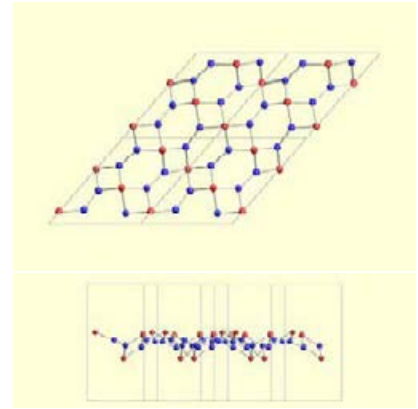

TeCd<sub>2</sub> (P)

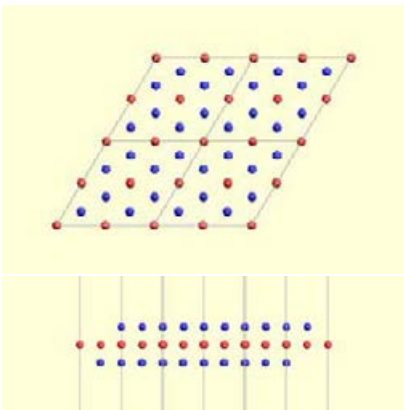

TeTe<sub>2</sub> (T)

×

×



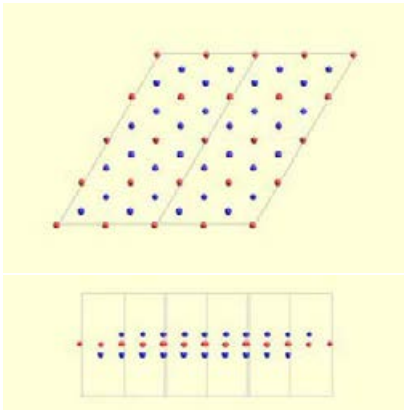

TeCs<sub>2</sub> (T)

×

×

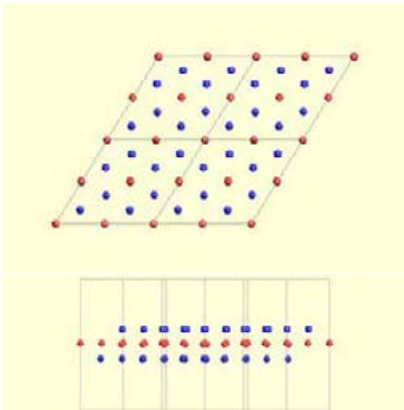

TeTl<sub>2</sub> (T)

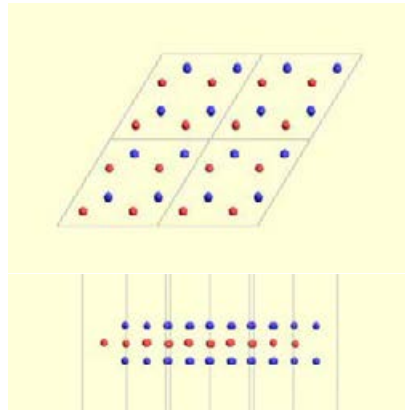

TeTl<sub>2</sub> (H)

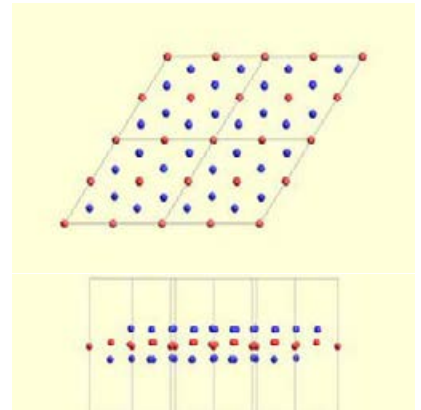

TeTl<sub>2</sub> (P)

×

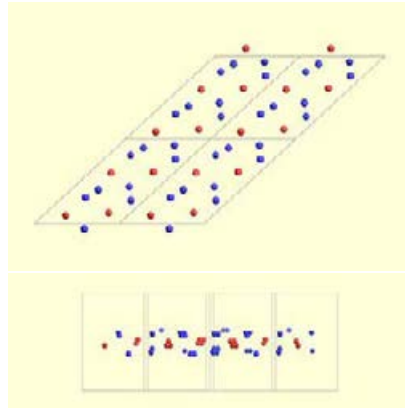

TePb<sub>2</sub> (H)

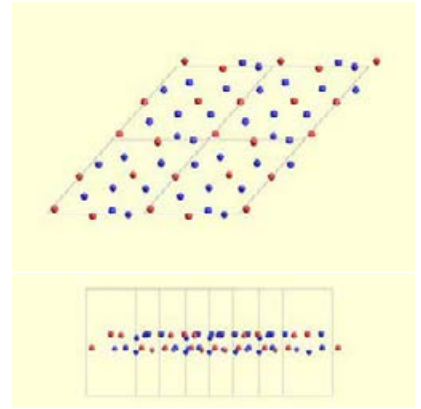

TePb<sub>2</sub> (P)

×

×

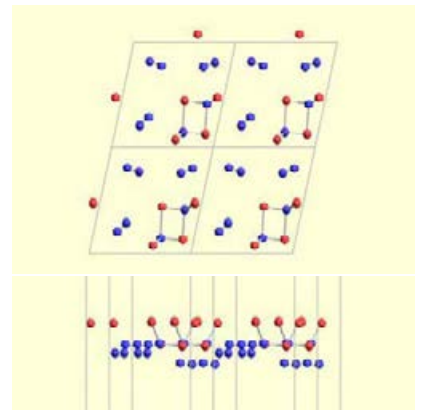

IN<sub>2</sub> (P)

×

×

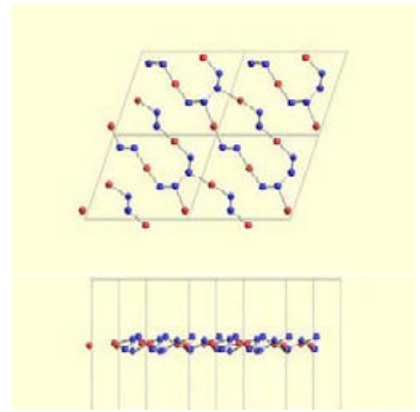

$IS_2$  (P)

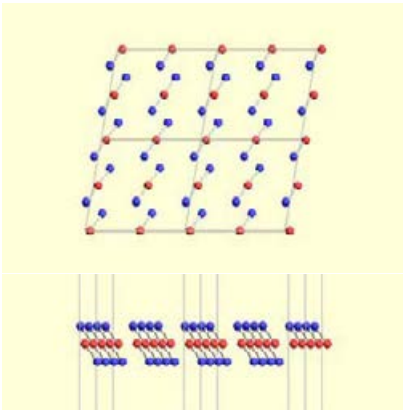

$ICl_2$  (T)

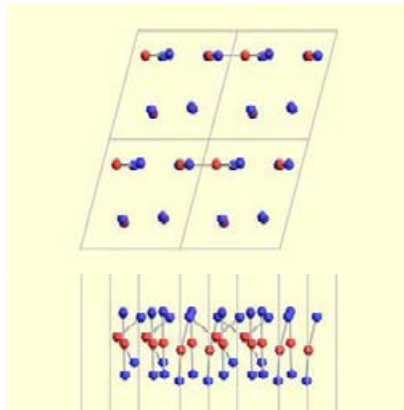

$ICl_2$  (H)

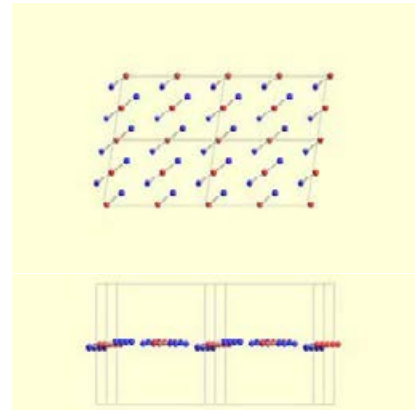

$ICl_2$  (P)

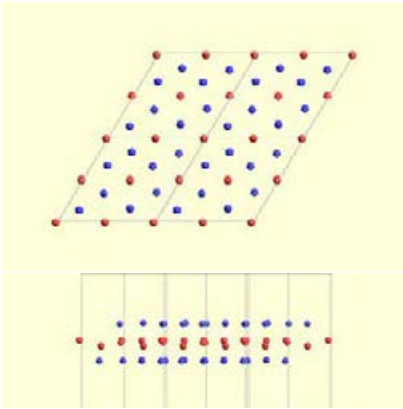

$IK_2$  (T)

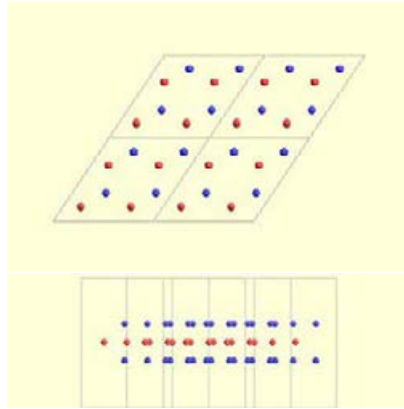

$IK_2$  (H)

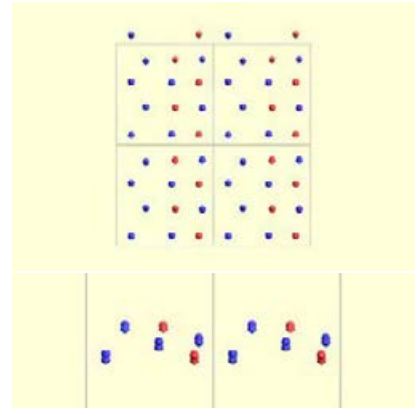

$IK_2$  (P)

×

×

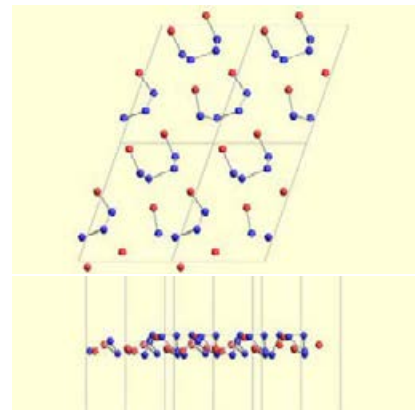

$ISe_2$  (P)

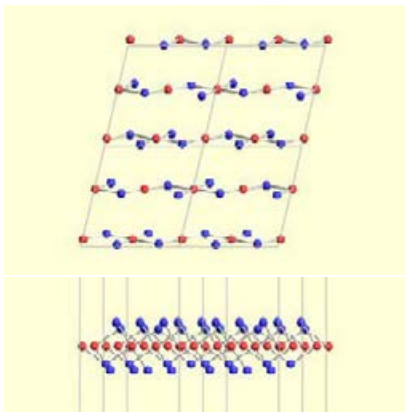

IBr<sub>2</sub> (T)

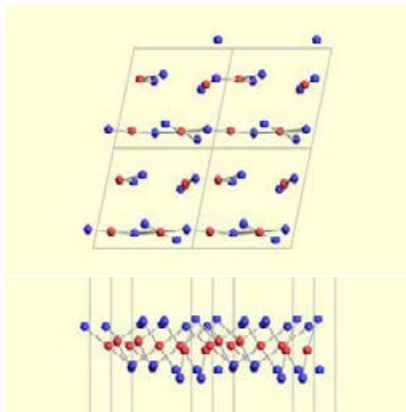

IBr<sub>2</sub> (H)

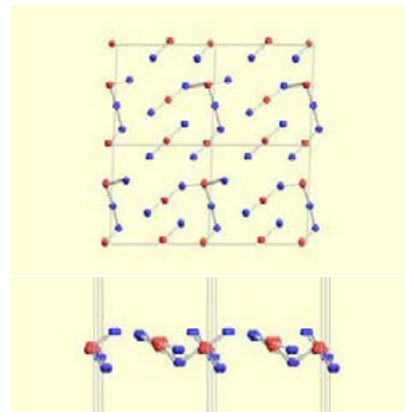

IBr<sub>2</sub> (P)

×

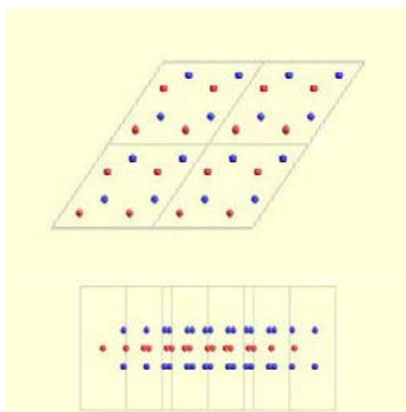

IRb<sub>2</sub> (H)

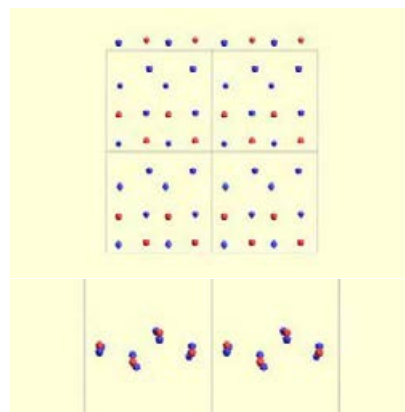

IRb<sub>2</sub> (P)

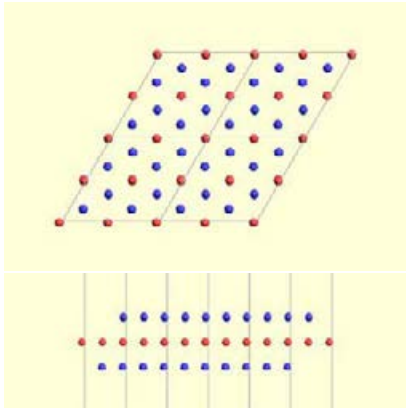

ISr<sub>2</sub> (T)

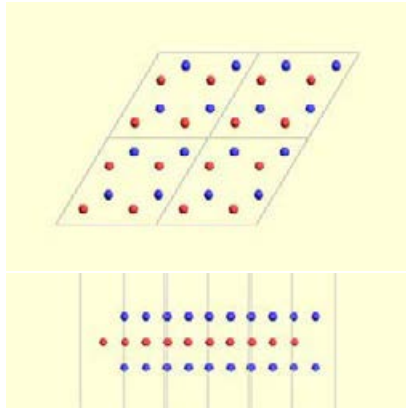

ISr<sub>2</sub> (H)

×

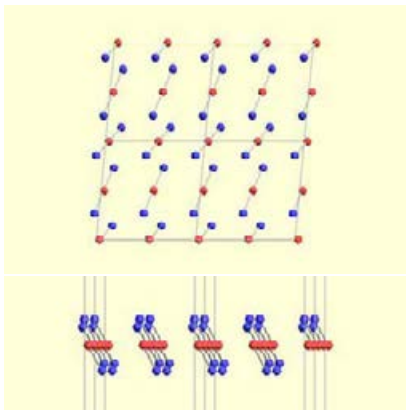

II<sub>2</sub> (T)

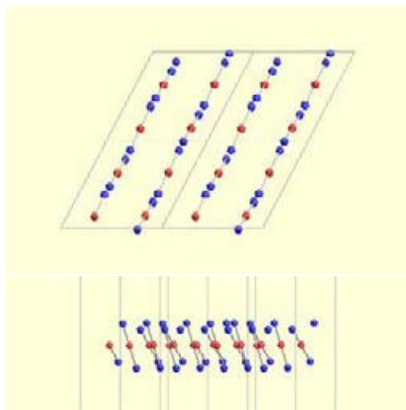

II<sub>2</sub> (H)

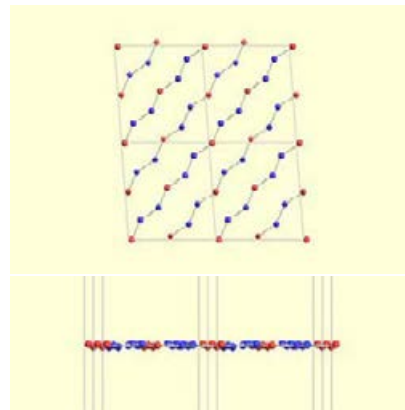

II<sub>2</sub> (P)

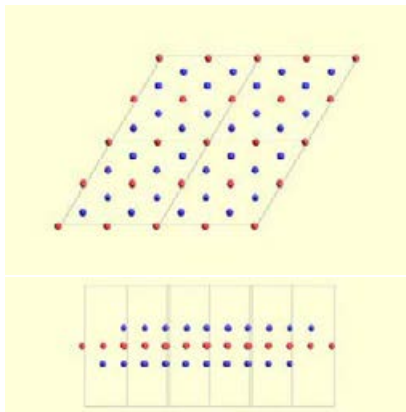

ICs<sub>2</sub> (T)

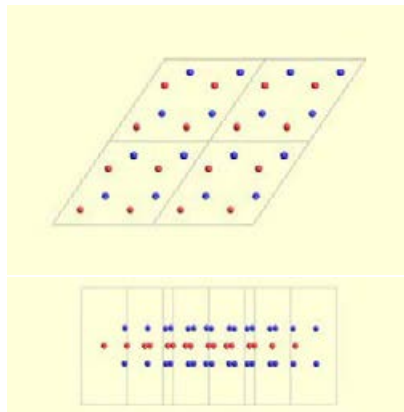

ICs<sub>2</sub> (H)

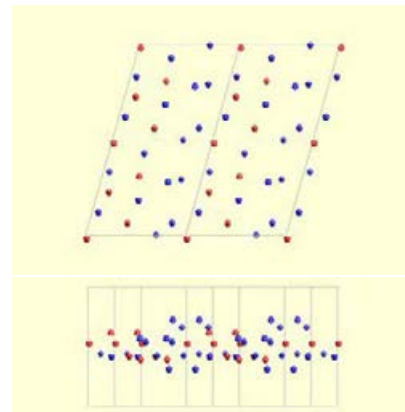

ICs<sub>2</sub> (P)

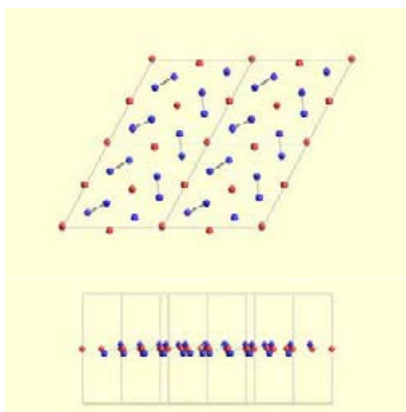

CsN<sub>2</sub> (T)

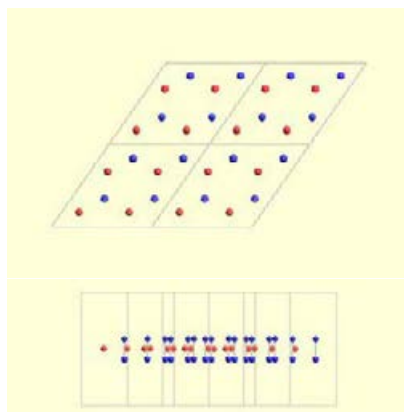

CsN<sub>2</sub> (H)

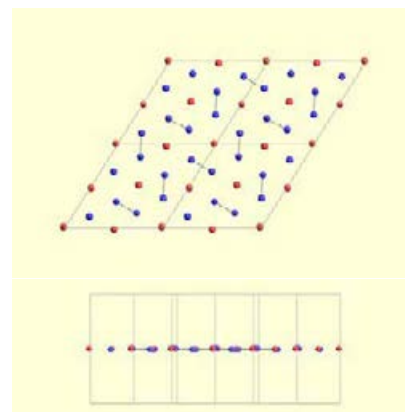

CsN<sub>2</sub> (P)

×

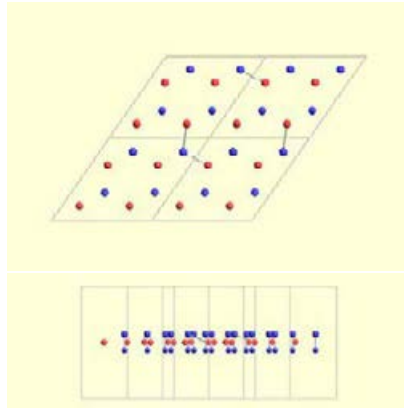

CsF<sub>2</sub> (H)

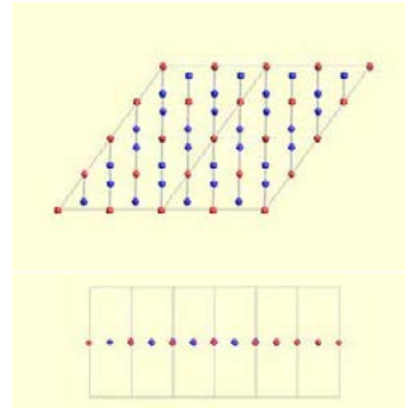

CsF<sub>2</sub> (P)

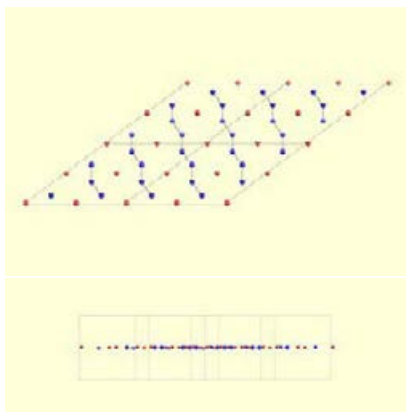

CsAl<sub>2</sub> (T)

×

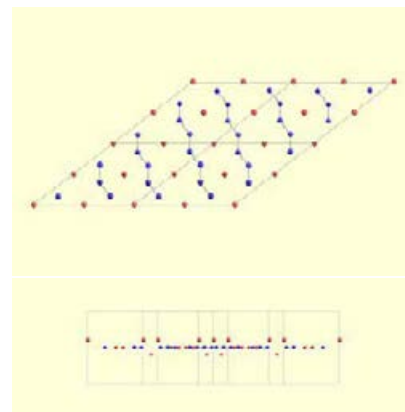

CsAl<sub>2</sub> (P)

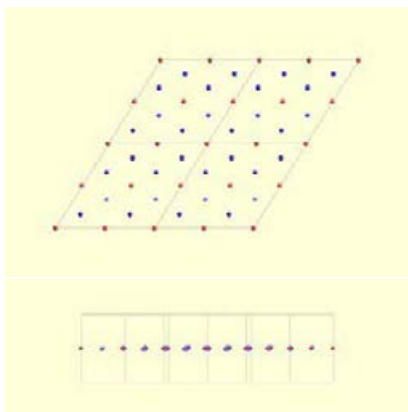

CsK<sub>2</sub> (T)

×

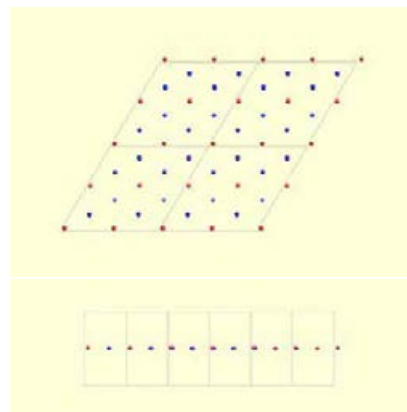

CsK<sub>2</sub> (P)

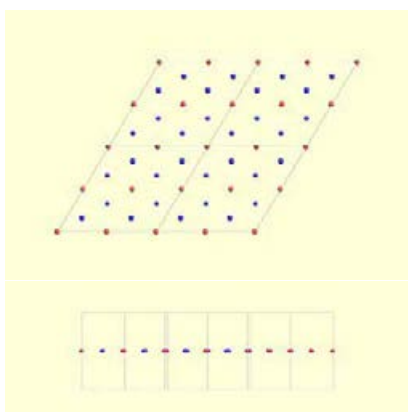

CsCa<sub>2</sub> (T)

×

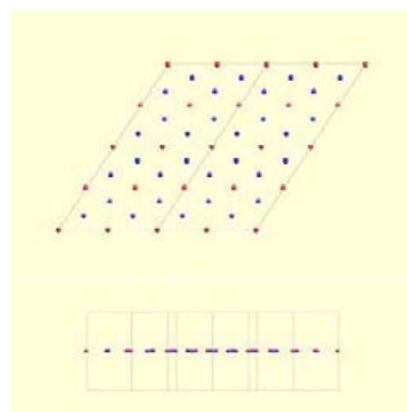

CsCa<sub>2</sub> (P)

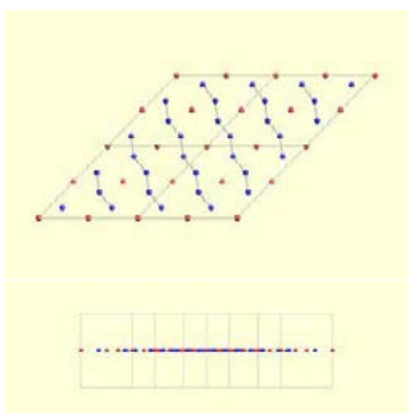

CsCr<sub>2</sub> (T)

×

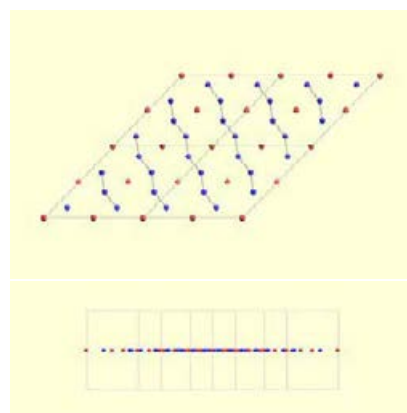

CsCr<sub>2</sub> (P)

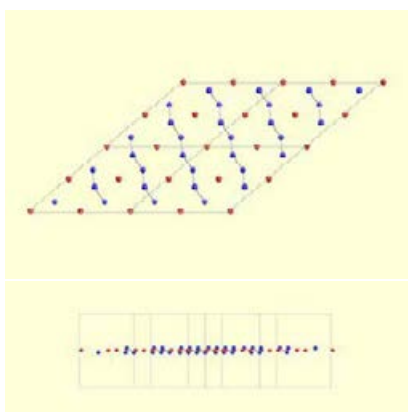

CsSe<sub>2</sub> (T)

×

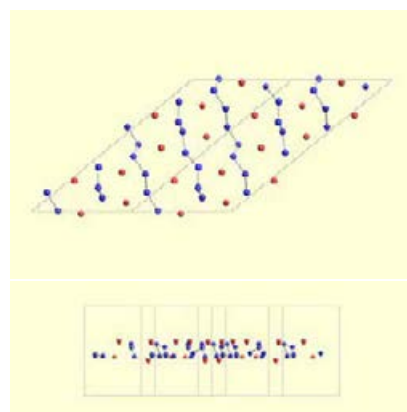

CsSe<sub>2</sub> (P)



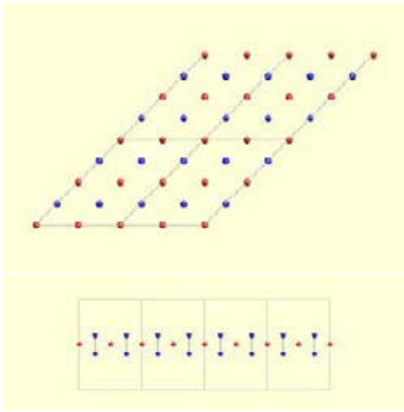

CsBr<sub>2</sub> (T)

×

×

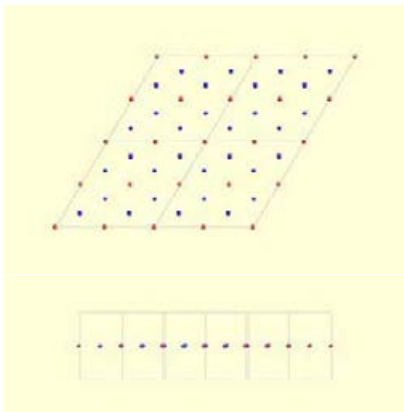

CsRb<sub>2</sub> (T)

×

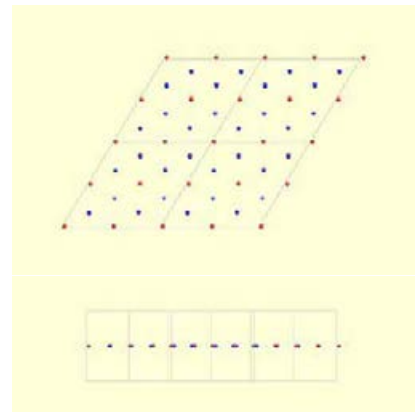

CsRb<sub>2</sub> (P)

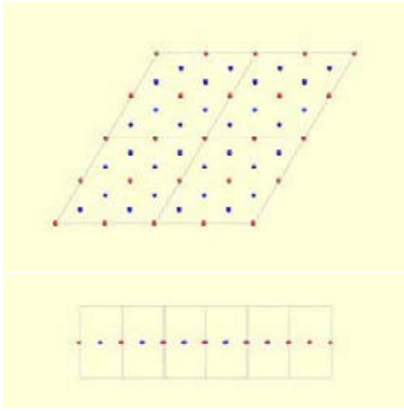

CsSr<sub>2</sub> (T)

×

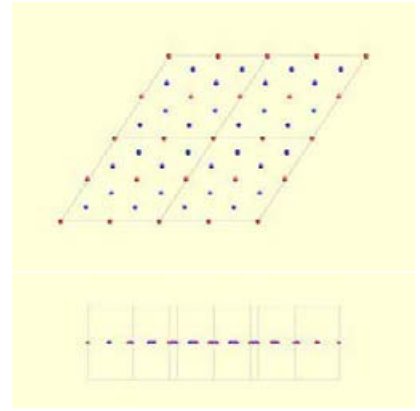

CsSr<sub>2</sub> (P)

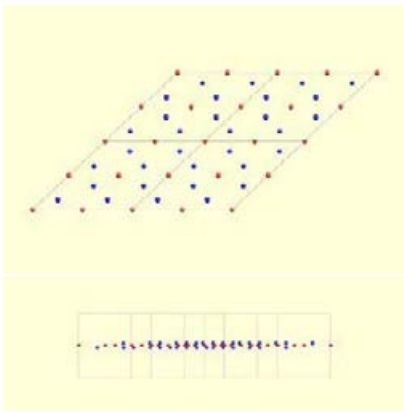

CsY<sub>2</sub> (T)

×

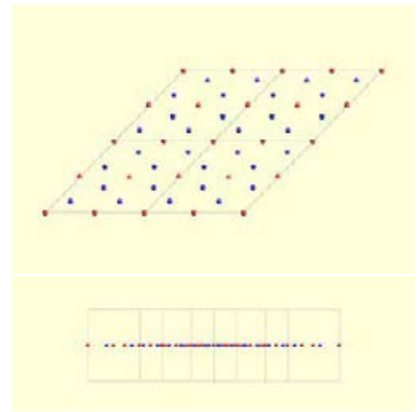

CsY<sub>2</sub> (P)

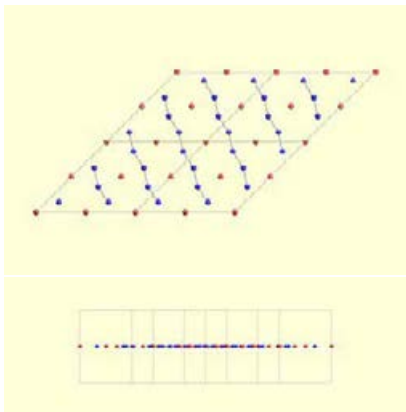

CsAg<sub>2</sub> (T)

×

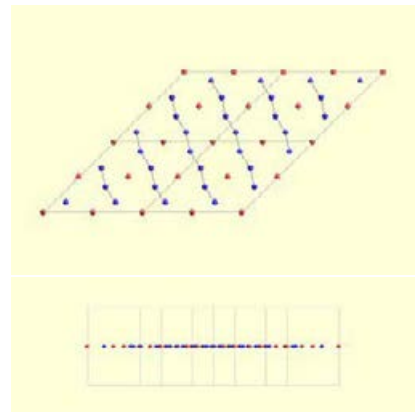

CsAg<sub>2</sub> (P)

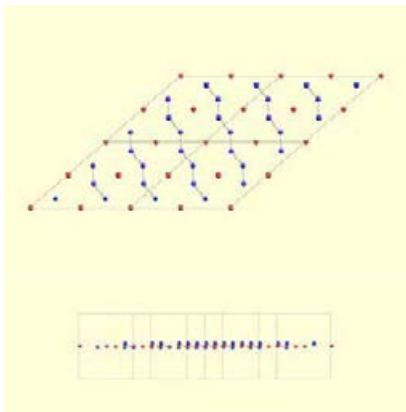

CsIn<sub>2</sub> (T)

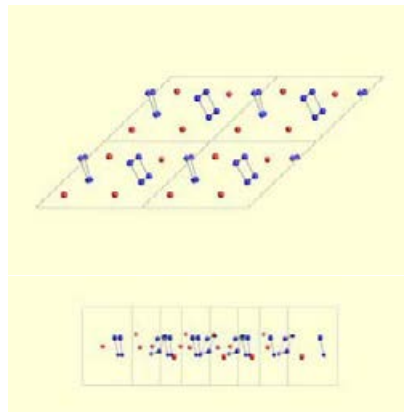

CsIn<sub>2</sub> (H)

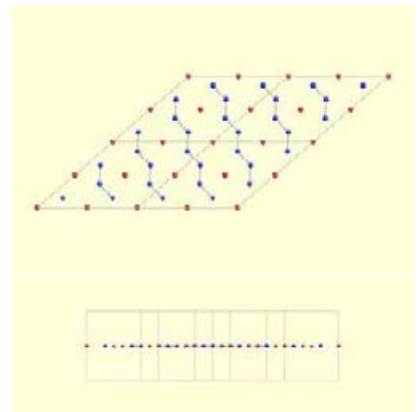

CsIn<sub>2</sub> (P)

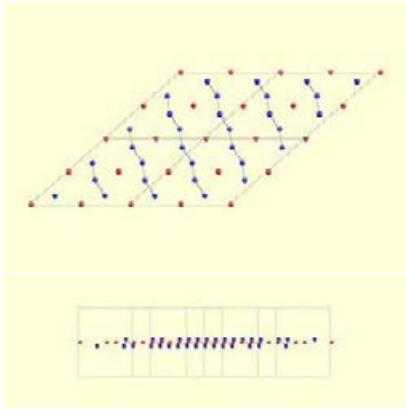

CsTe<sub>2</sub> (T)

×

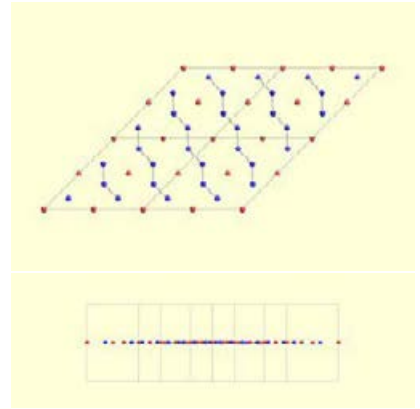

CsTe<sub>2</sub> (P)

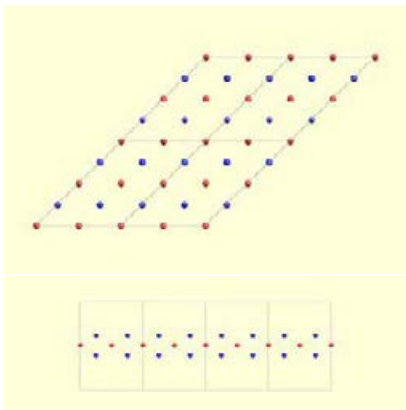

CsI<sub>2</sub> (T)

×

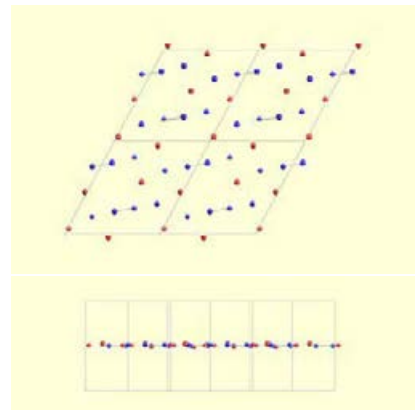

CsI<sub>2</sub> (P)

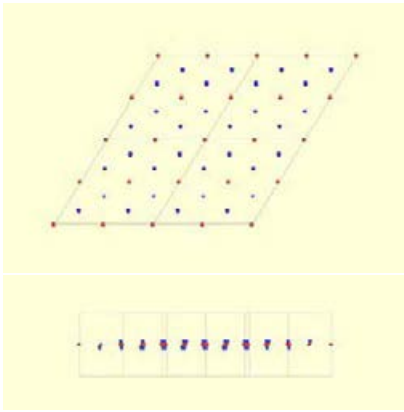

CsCs<sub>2</sub> (T)

×

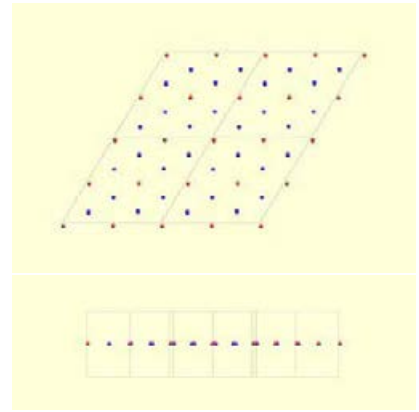

CsCs<sub>2</sub> (P)

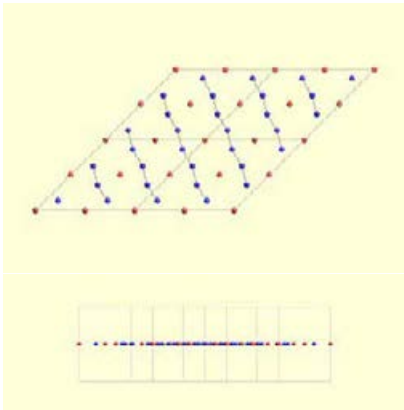

CsAu<sub>2</sub> (T)

×

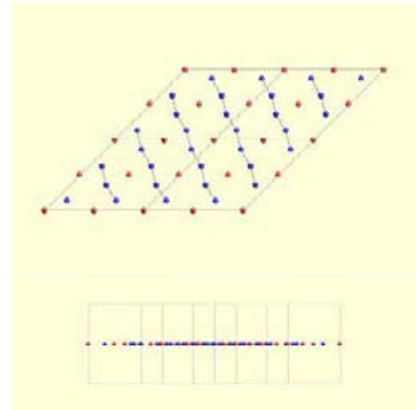

CsAu<sub>2</sub> (P)

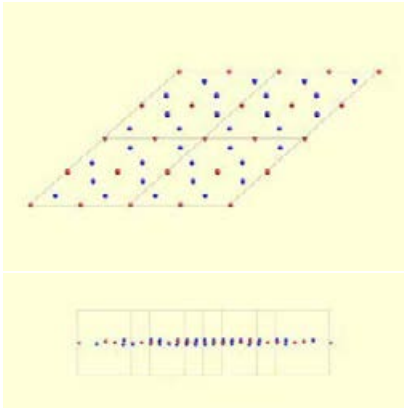

CsTl<sub>2</sub> (T)

×

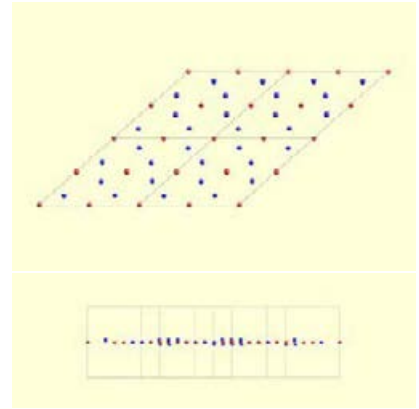

CsTl<sub>2</sub> (P)

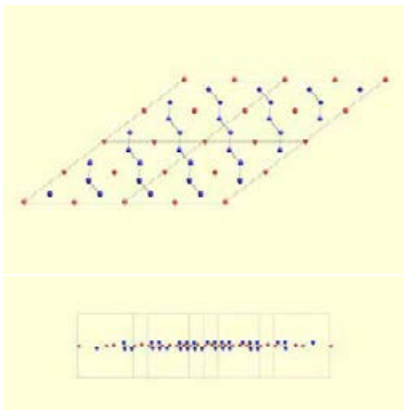

CsPb<sub>2</sub> (T)

×

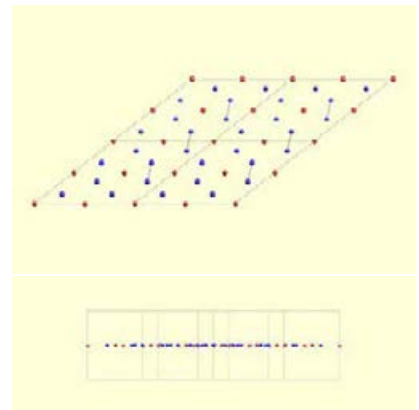

CsPb<sub>2</sub> (P)

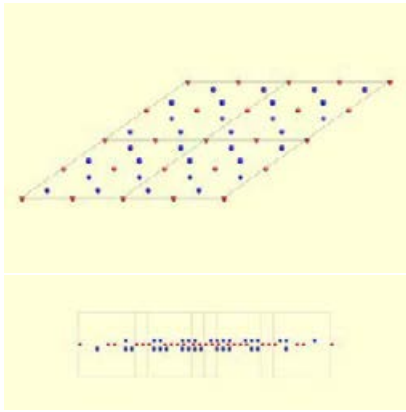

CsBi<sub>2</sub> (T)

×

×

×

×

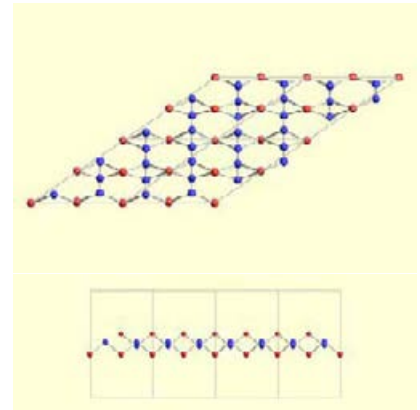

BaB<sub>2</sub> (P)

×

×

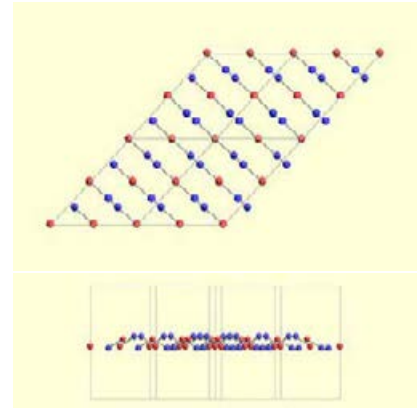

BaC<sub>2</sub> (P)

×

×

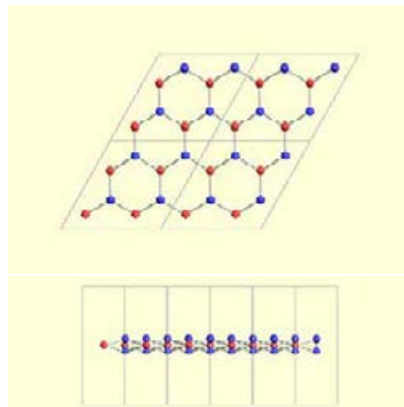

BaN<sub>2</sub> (H)

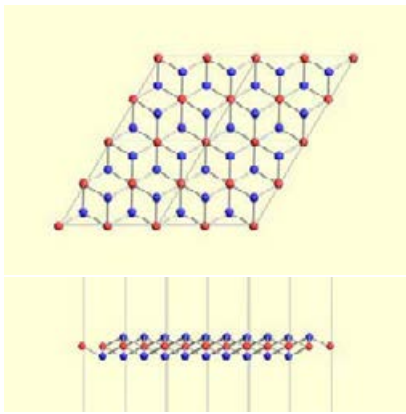

$\text{BaF}_2$  (T)

×

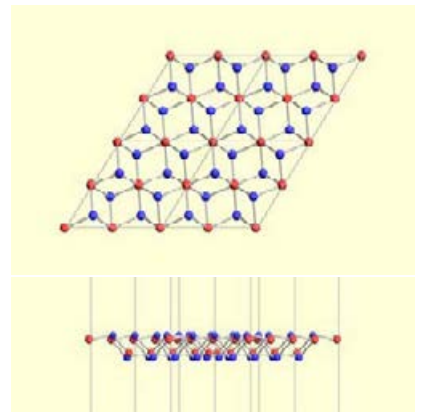

$\text{BaF}_2$  (P)

×

×

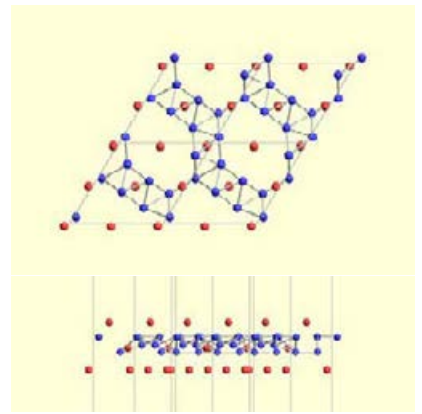

$\text{BaAl}_2$  (P)

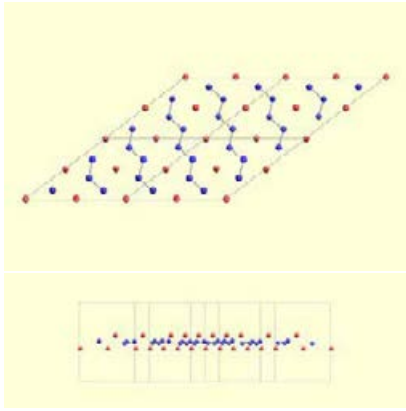

$\text{BaSi}_2$  (T)

×

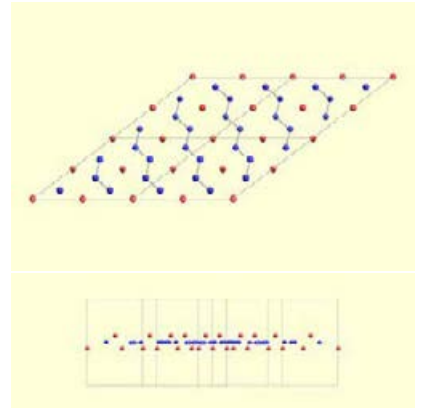

$\text{BaSi}_2$  (P)

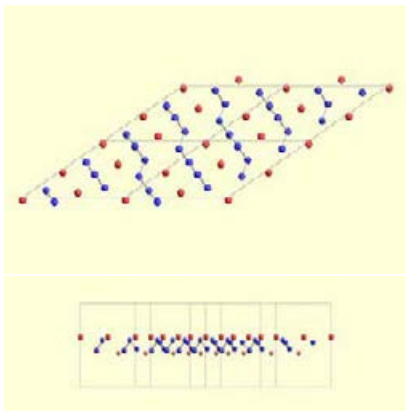

$\text{BaP}_2$  (T)

×

×



×

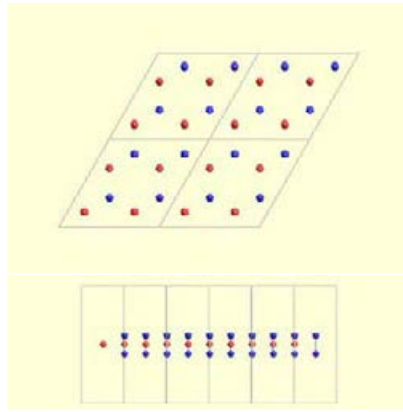

BaS<sub>2</sub> (H)

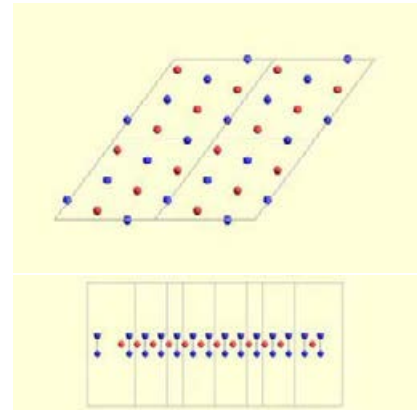

BaS<sub>2</sub> (P)

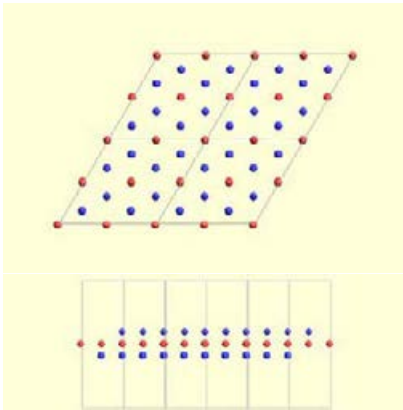

BaCl<sub>2</sub> (T)

×

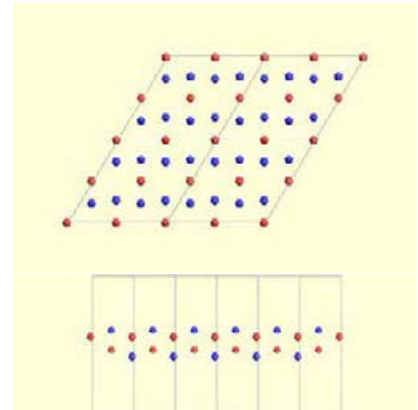

BaCl<sub>2</sub> (P)

×

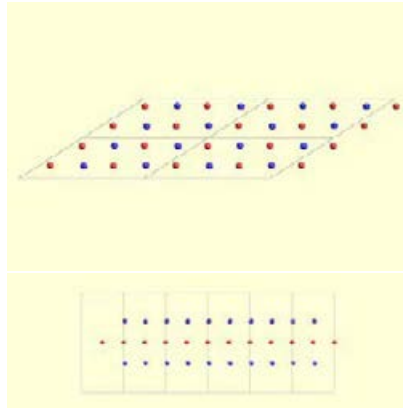

BaK<sub>2</sub> (H)

×

×

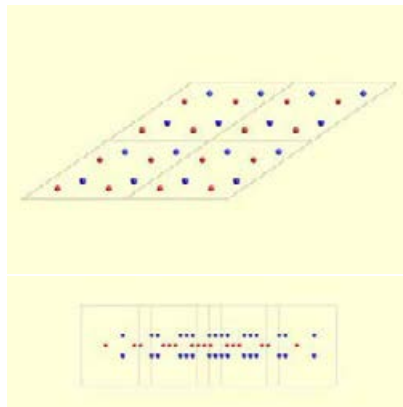

BaCa<sub>2</sub> (H)

×

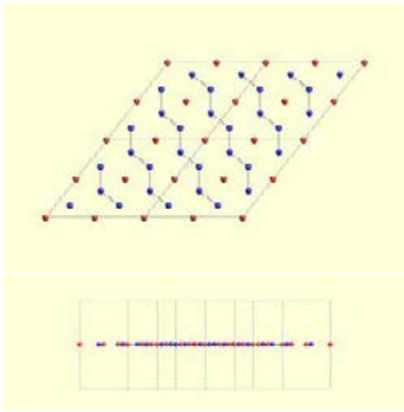

BaCr<sub>2</sub> (T)

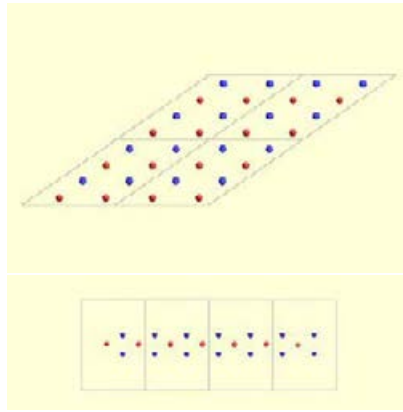

BaCr<sub>2</sub> (H)

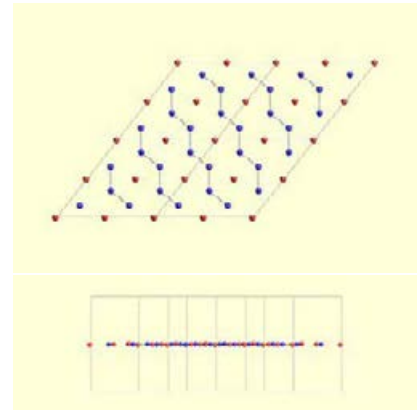

BaCr<sub>2</sub> (P)

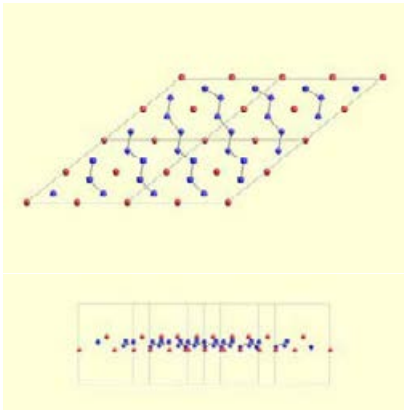

BaGe<sub>2</sub> (T)

×

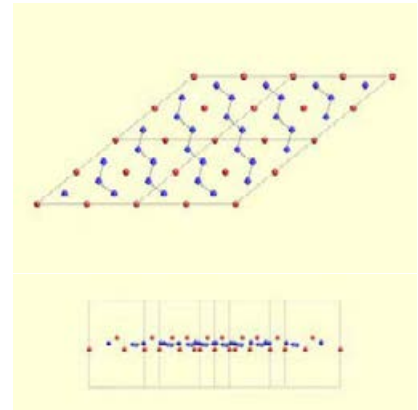

BaGe<sub>2</sub> (P)

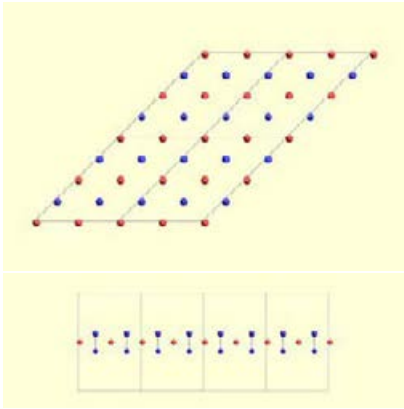

BaSe<sub>2</sub> (T)

×

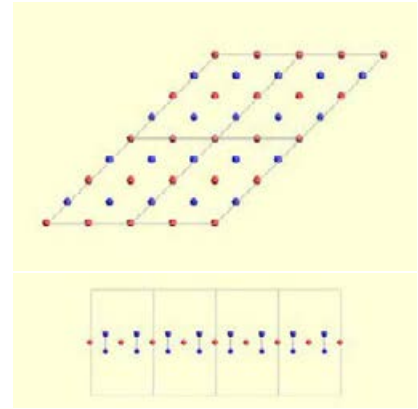

BaSe<sub>2</sub> (P)

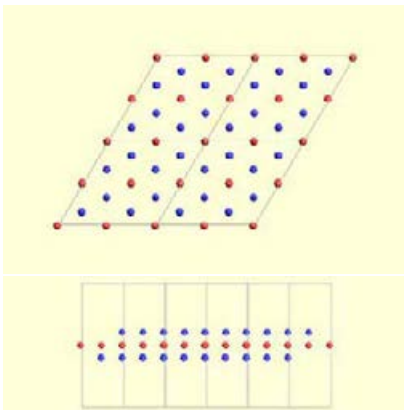

BaBr<sub>2</sub> (T)

×

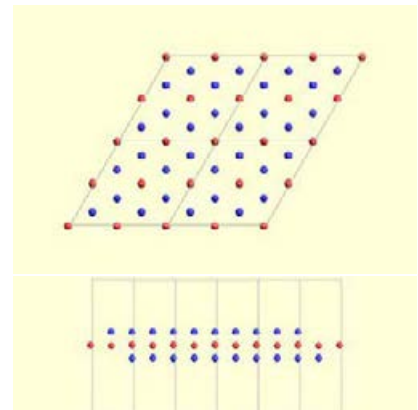

BaBr<sub>2</sub> (P)

×

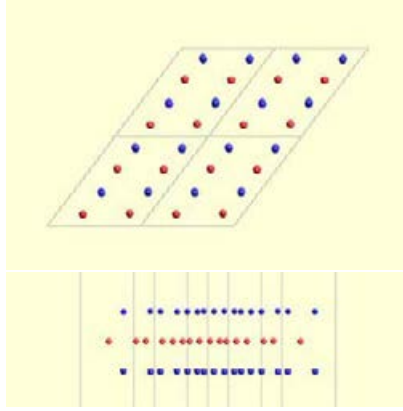

BaRb<sub>2</sub> (H)

×

×

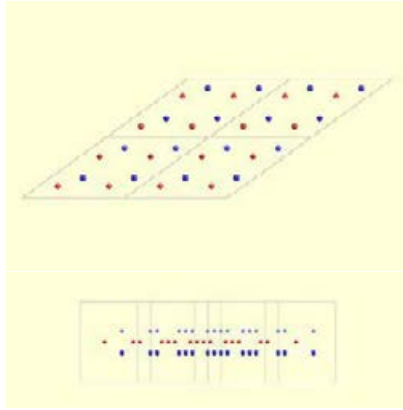

BaSr<sub>2</sub> (H)

×

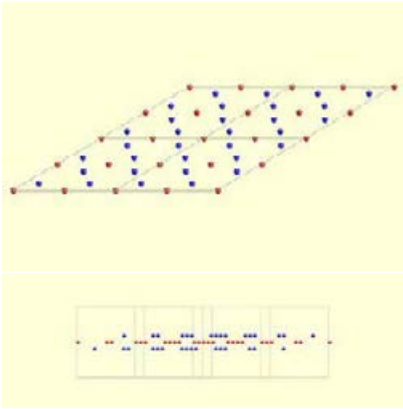

BaY<sub>2</sub> (T)

×

×

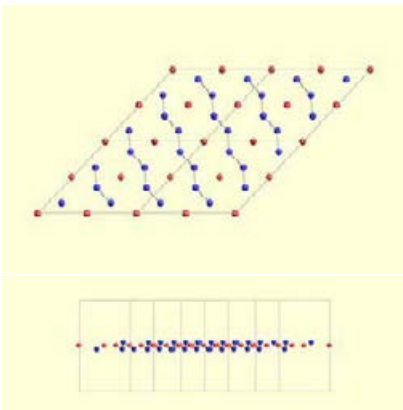

BaPd<sub>2</sub> (T)

×

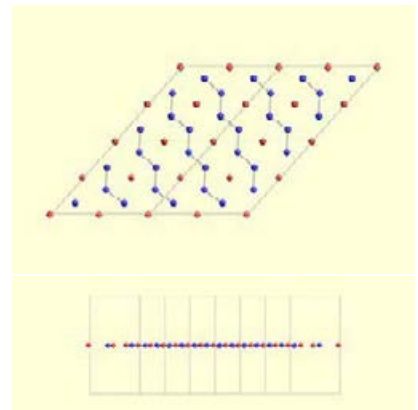

BaPd<sub>2</sub> (P)

×

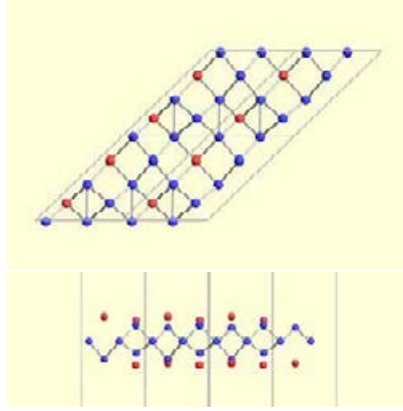

BaAg<sub>2</sub> (H)

×

×

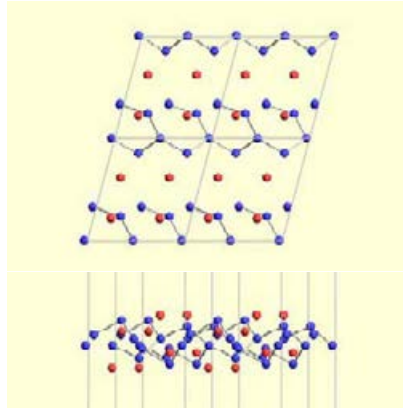

BaSn<sub>2</sub> (H)

×

×

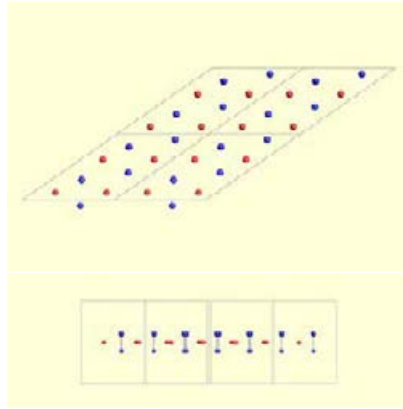

BaSb<sub>2</sub> (H)

×

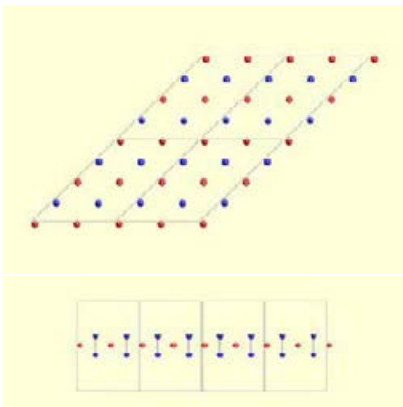

BaTe<sub>2</sub> (T)

×

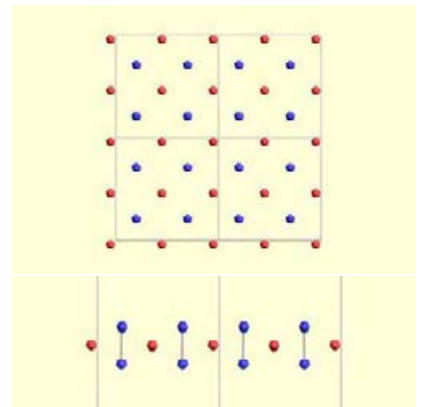

BaTe<sub>2</sub> (P)

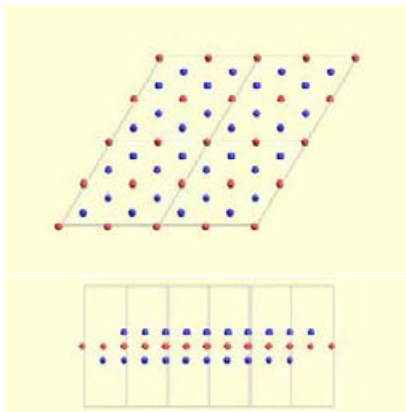

$\text{BaI}_2$  (T)

×

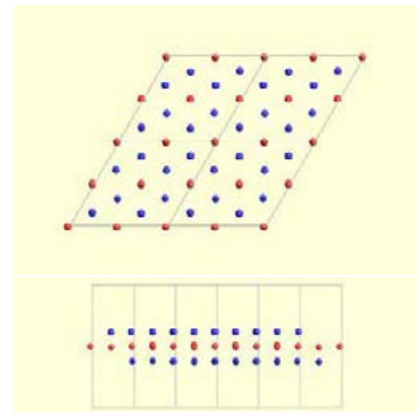

$\text{BaI}_2$  (P)

×

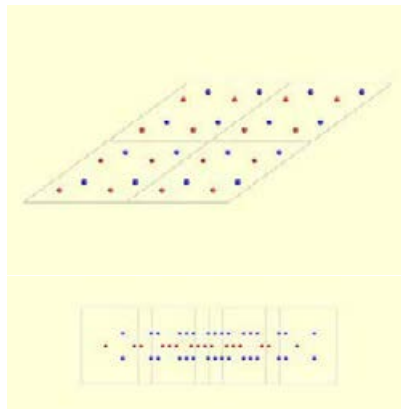

$\text{BaCs}_2$  (H)

×

×

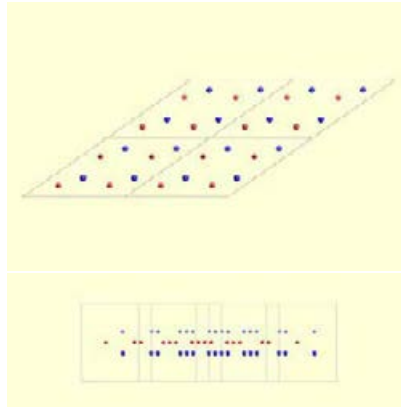

$\text{BaBa}_2$  (H)

×

×

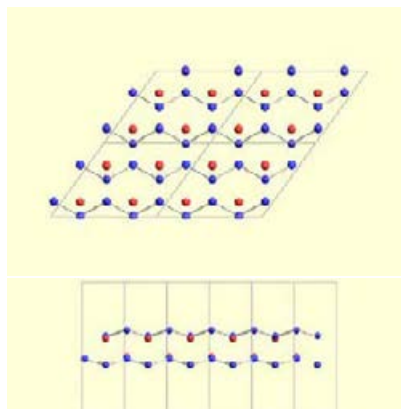

$\text{BaAu}_2$  (H)

×



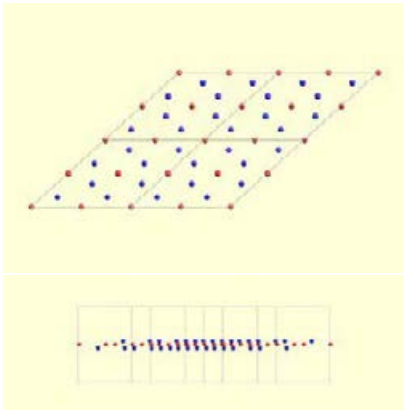

BaPb<sub>2</sub> (T)

×

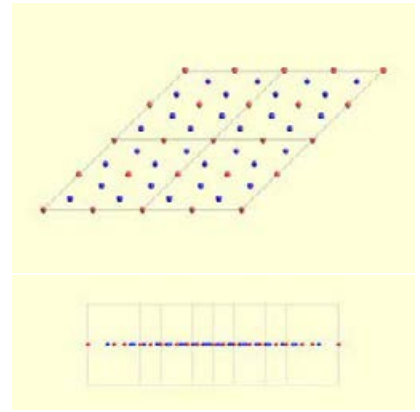

BaPb<sub>2</sub> (P)

×

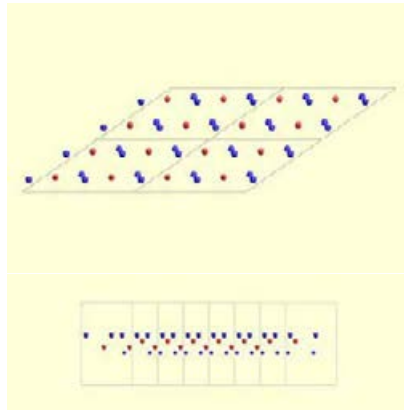

BaBi<sub>2</sub> (H)

×

×

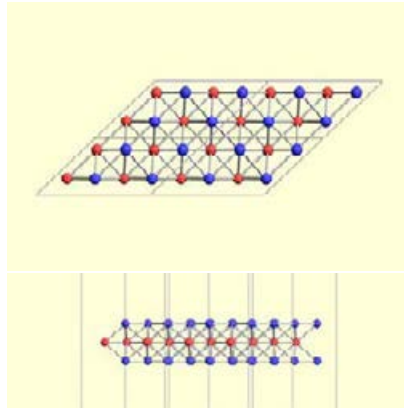

HfBe<sub>2</sub> (H)

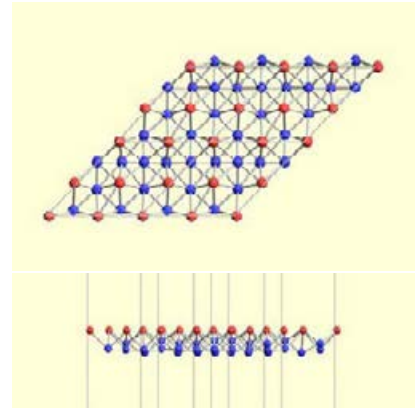

HfBe<sub>2</sub> (P)

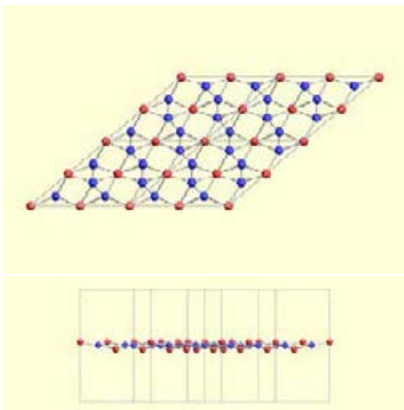

HfB<sub>2</sub> (T)

×

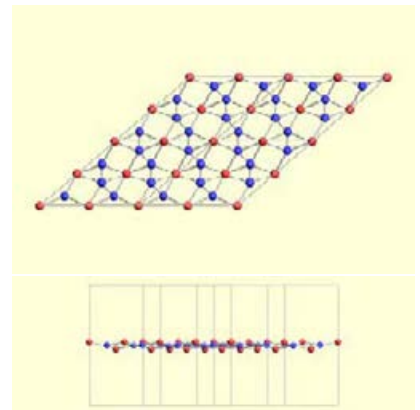

HfB<sub>2</sub> (P)

×

×

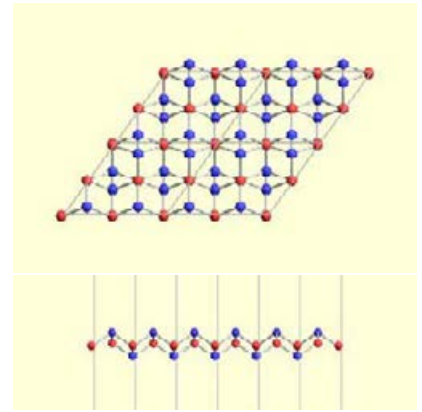

HfC<sub>2</sub> (P)

×

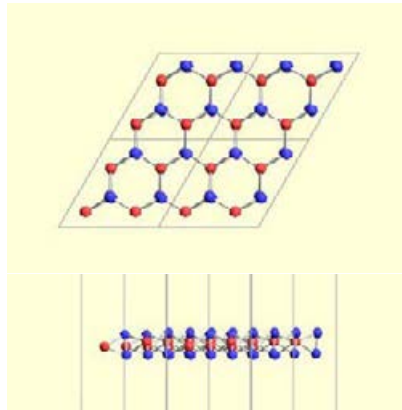

HfN<sub>2</sub> (H)

×

×

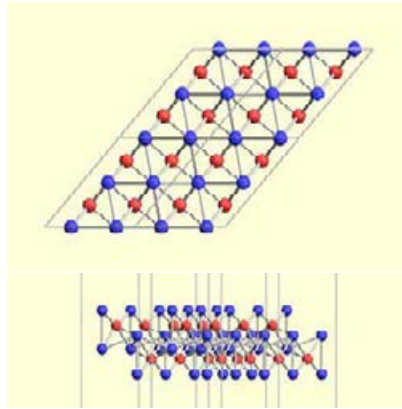

HfO<sub>2</sub> (H)

×

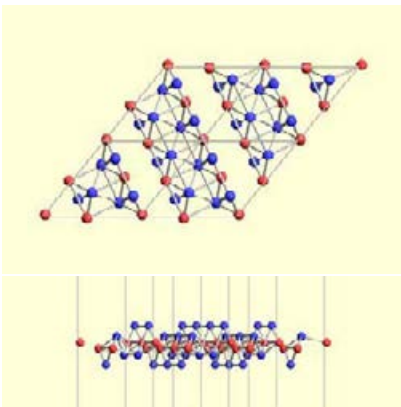

HfF<sub>2</sub> (T)

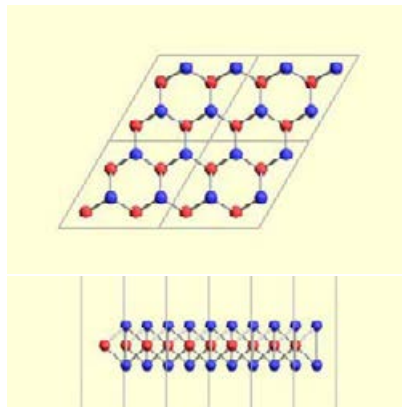

HfF<sub>2</sub> (H)

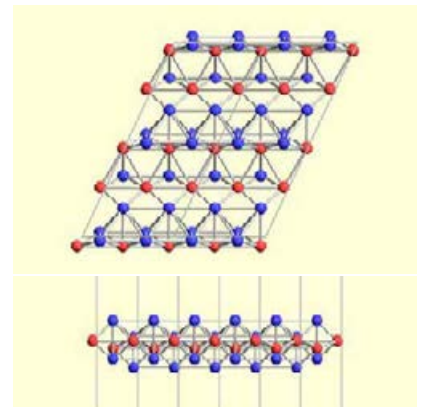

HfF<sub>2</sub> (P)

×

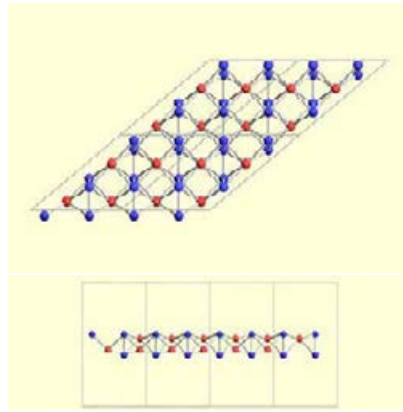

HfSi<sub>2</sub> (H)

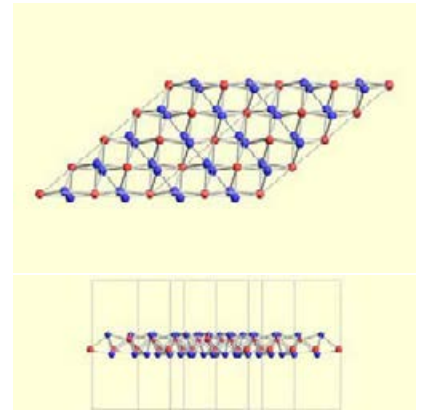

HfSi<sub>2</sub> (P)

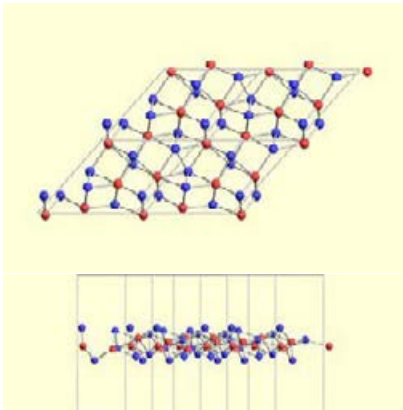

HfP<sub>2</sub> (T)

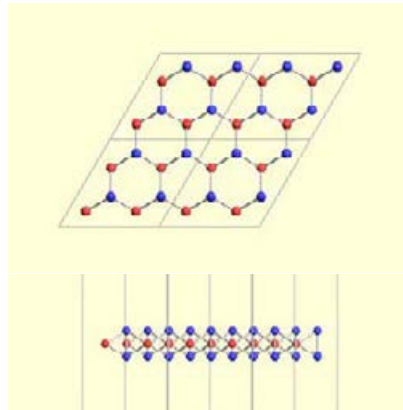

HfP<sub>2</sub> (H)

×

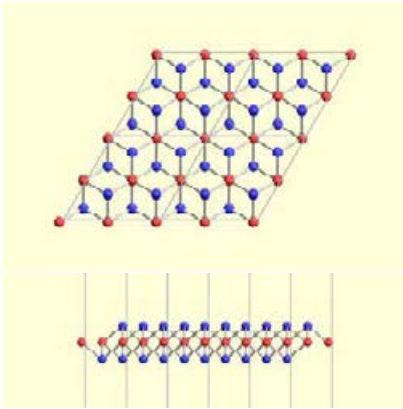

HfS<sub>2</sub> (T)

×

×

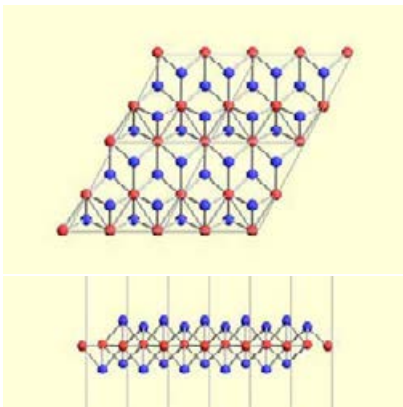

HfCl<sub>2</sub> (T)

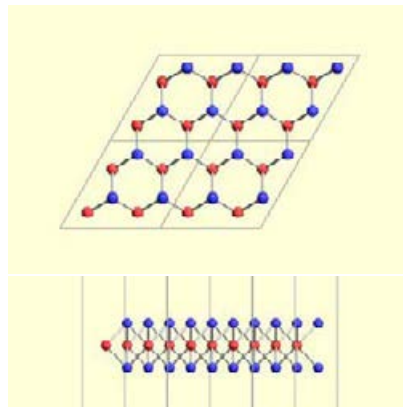

HfCl<sub>2</sub> (H)

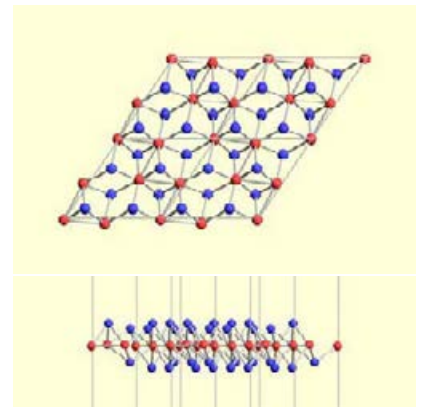

HfCl<sub>2</sub> (P)

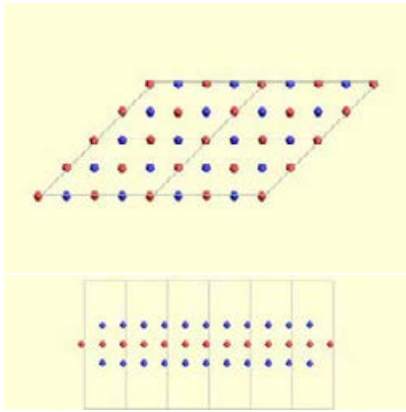

HfCa<sub>2</sub> (T)

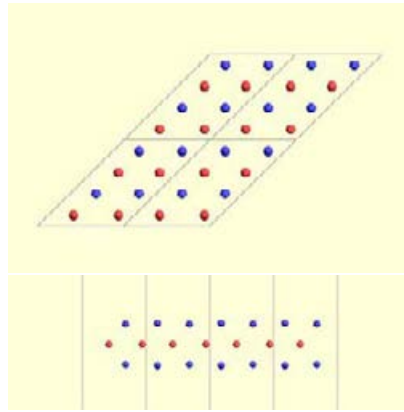

HfCa<sub>2</sub> (H)

×

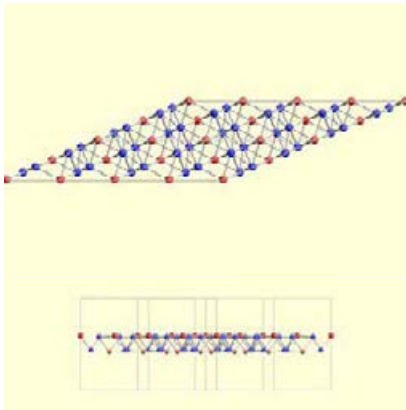

HfV<sub>2</sub> (T)

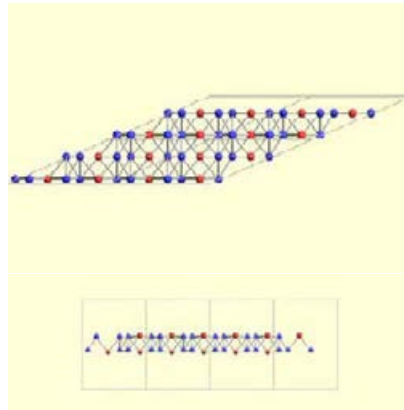

HfV<sub>2</sub> (H)

×

×

×

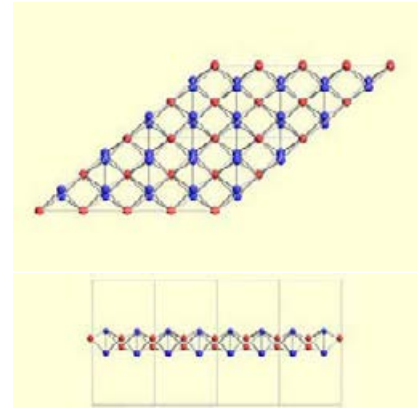

HfGe<sub>2</sub> (P)

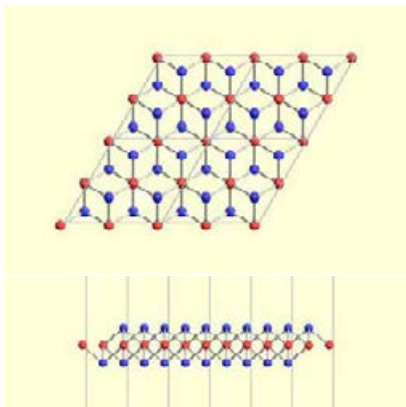

HfSe<sub>2</sub> (T)

×

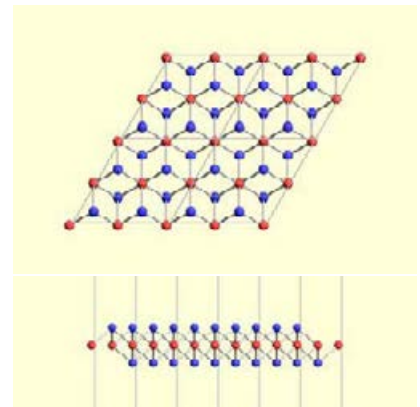

HfSe<sub>2</sub> (P)



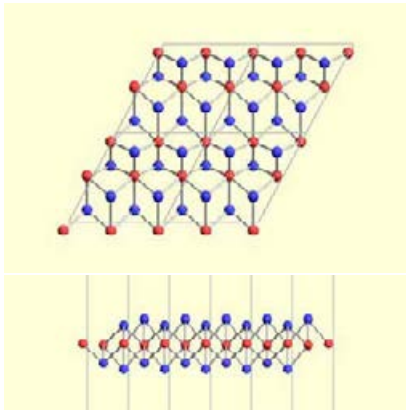

HfBr<sub>2</sub> (T)

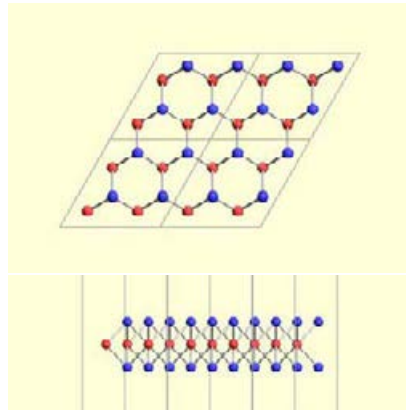

HfBr<sub>2</sub> (H)

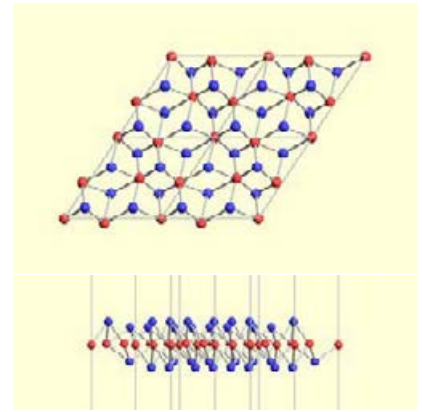

HfBr<sub>2</sub> (P)

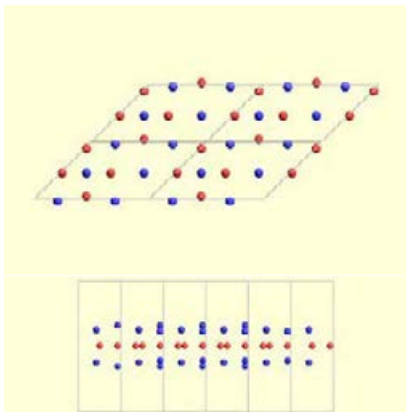

HfY<sub>2</sub> (T)

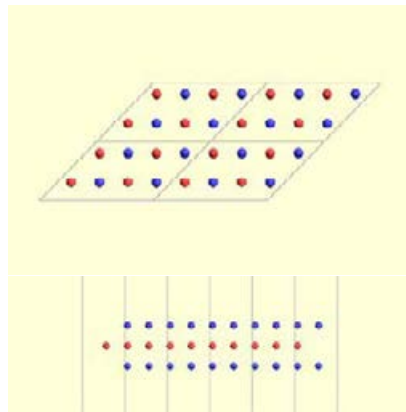

HfY<sub>2</sub> (H)

×

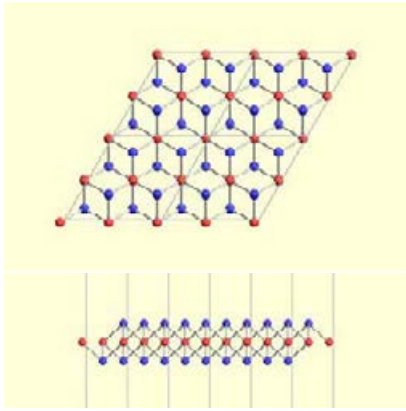

HfTe<sub>2</sub> (T)

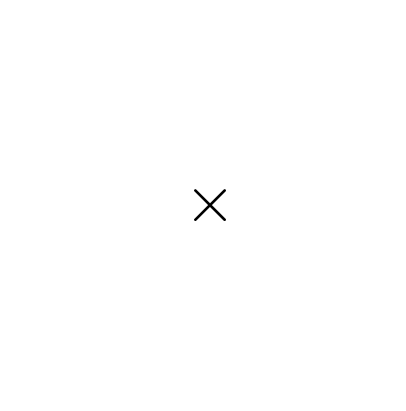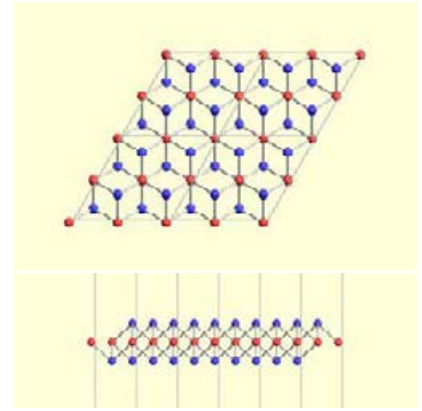

HfTe<sub>2</sub> (P)

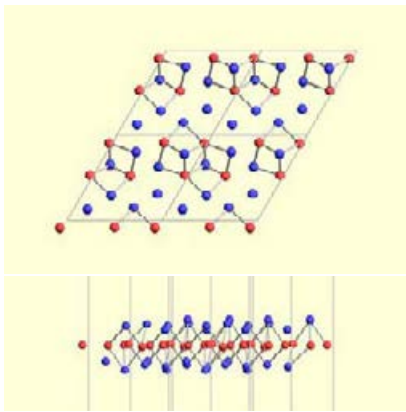

HfI<sub>2</sub> (T)

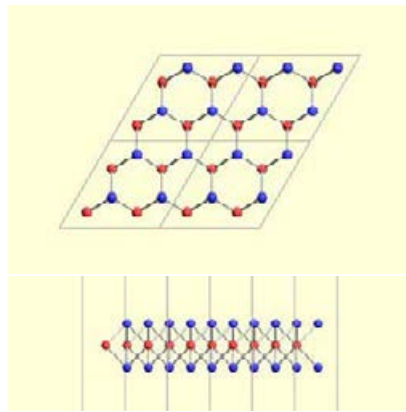

HfI<sub>2</sub> (H)

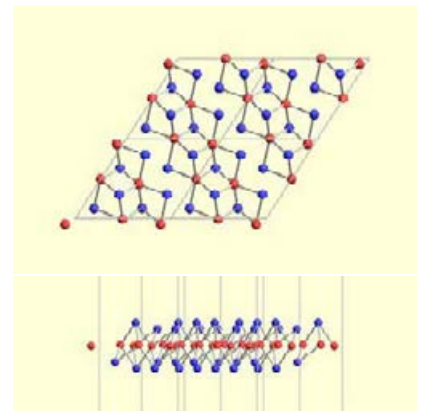

HfI<sub>2</sub> (P)



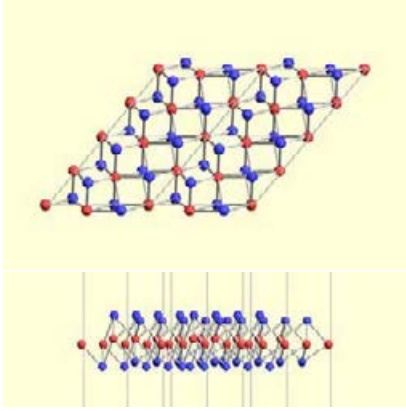

HfAu<sub>2</sub> (T)

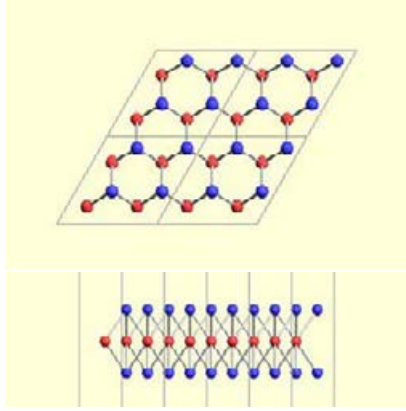

HfAu<sub>2</sub> (H)

×

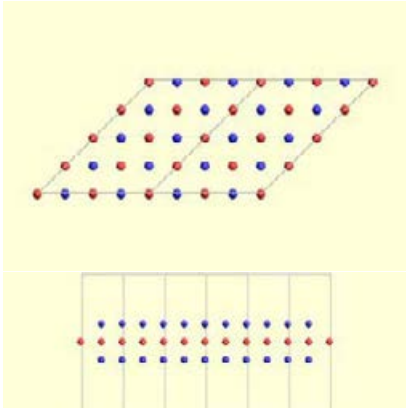

HfTl<sub>2</sub> (T)

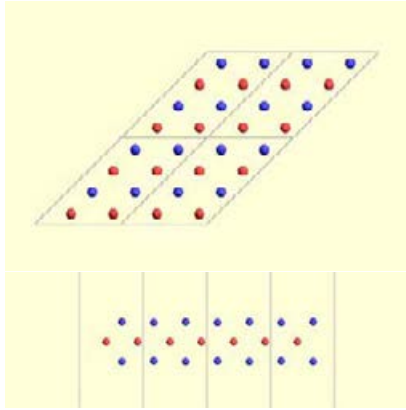

HfTl<sub>2</sub> (H)

×

×

×

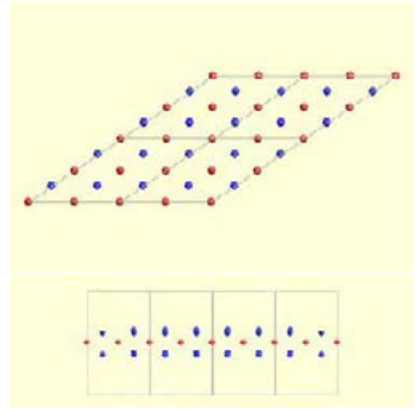

HfPb<sub>2</sub> (P)

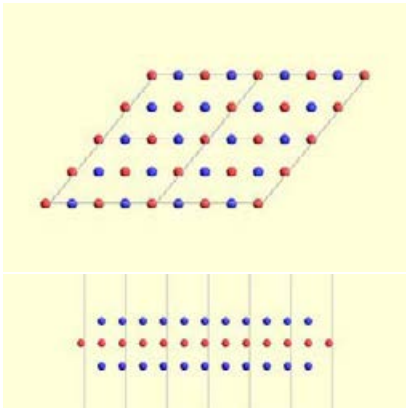

HfBi<sub>2</sub> (T)

×

×

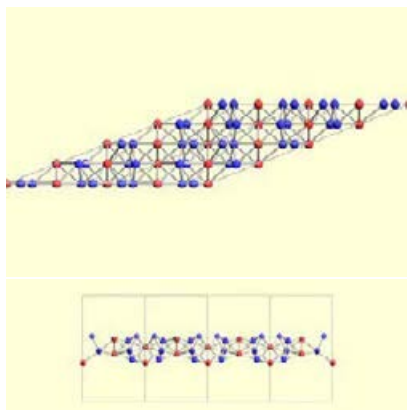

TaBe<sub>2</sub> (T)

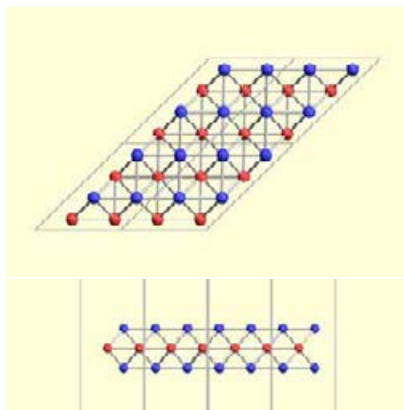

TaBe<sub>2</sub> (H)

×

×

×

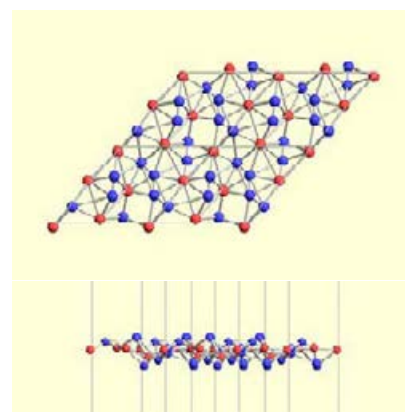

TaC<sub>2</sub> (P)

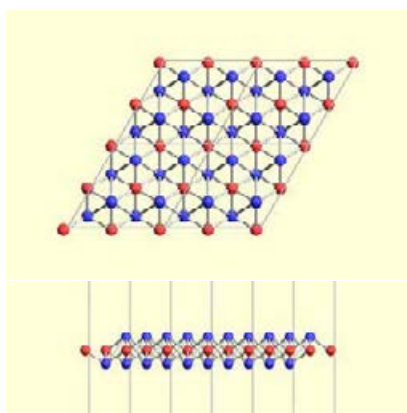

TaN<sub>2</sub> (T)

×

×

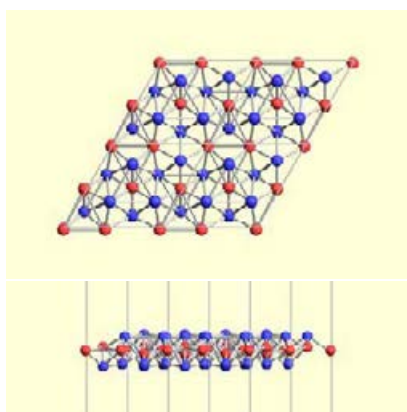

TaO<sub>2</sub> (T)

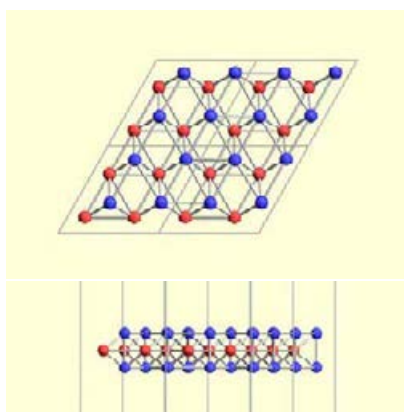

TaO<sub>2</sub> (H)

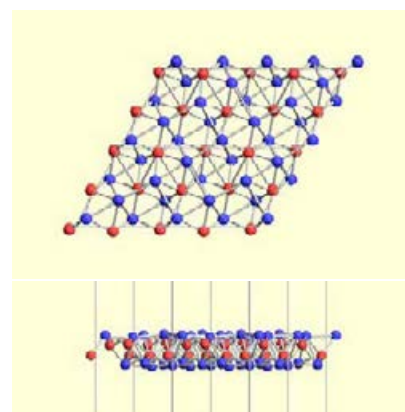

TaO<sub>2</sub> (P)

×

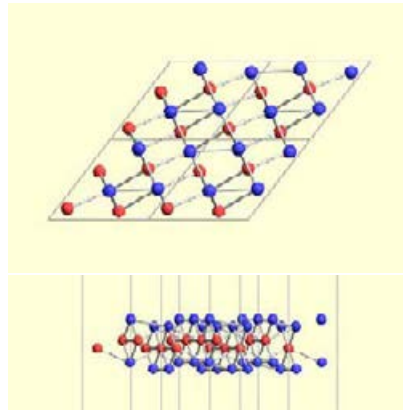

TaF<sub>2</sub> (H)

×

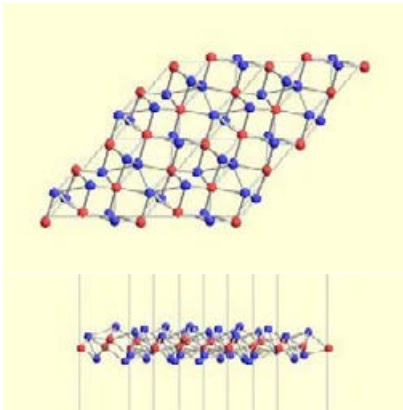

TaP<sub>2</sub> (T)

×

×

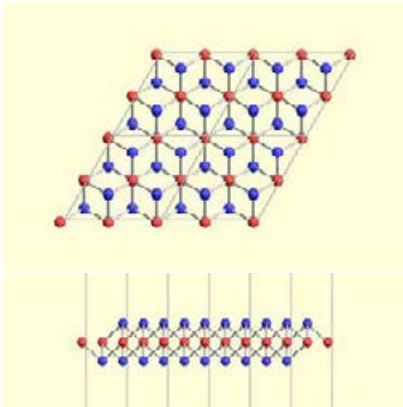

TaS<sub>2</sub> (T)

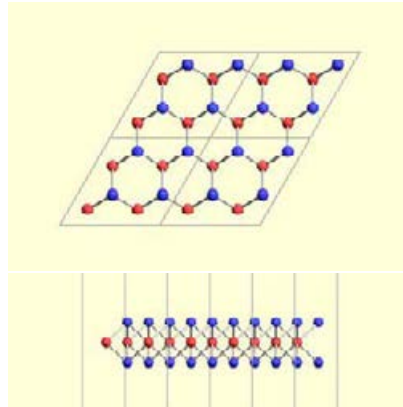

TaS<sub>2</sub> (H)

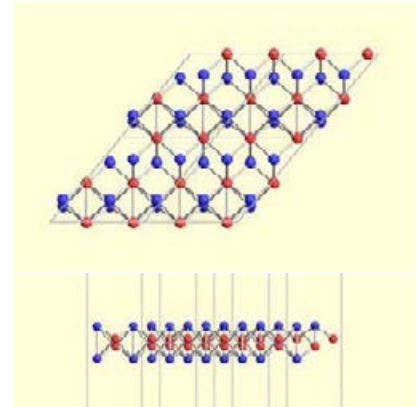

TaS<sub>2</sub> (P)

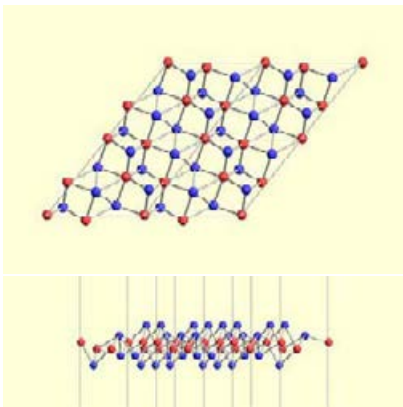

TaAs<sub>2</sub> (T)

×

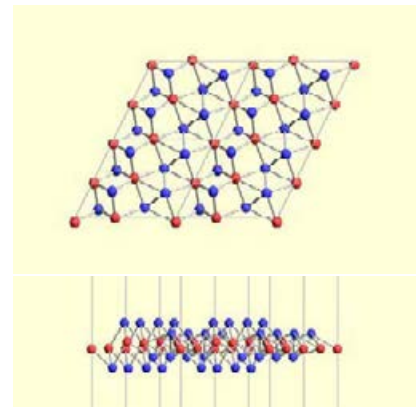

TaAs<sub>2</sub> (P)

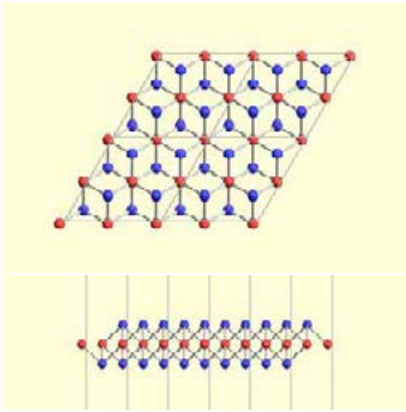

TaSe<sub>2</sub> (T)

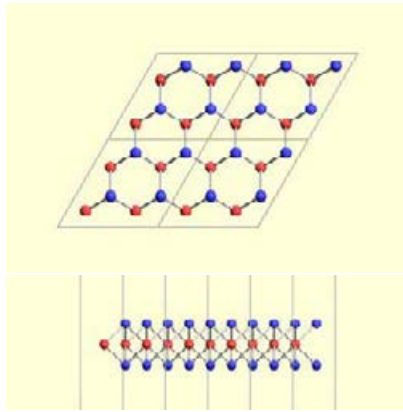

TaSe<sub>2</sub> (H)

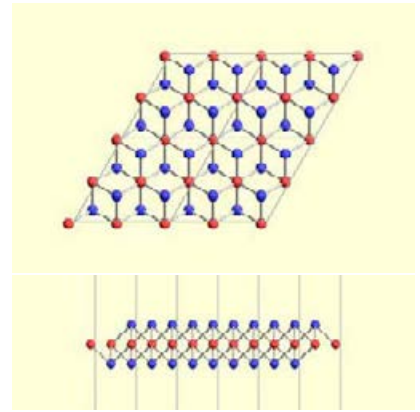

TaSe<sub>2</sub> (P)

×

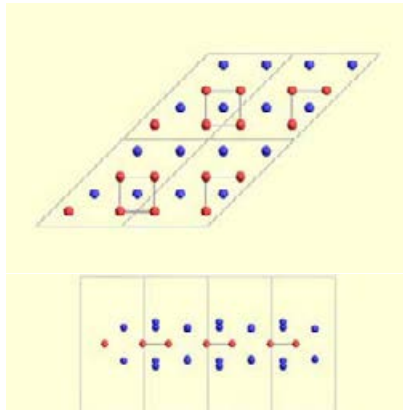

TaY<sub>2</sub> (H)

×

×

×

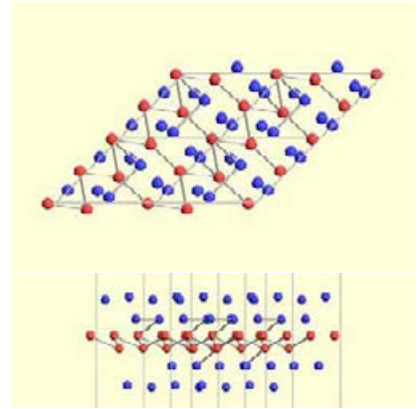

TaIn<sub>2</sub> (P)

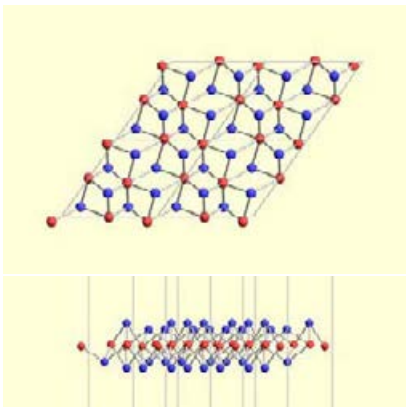

TaTe<sub>2</sub> (T)

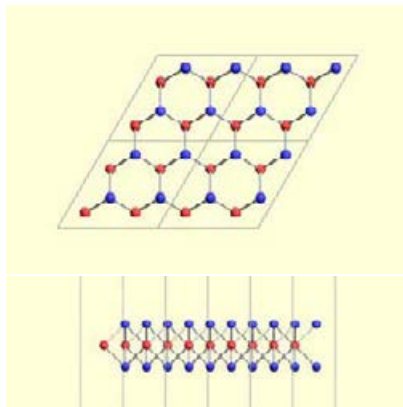

TaTe<sub>2</sub> (H)

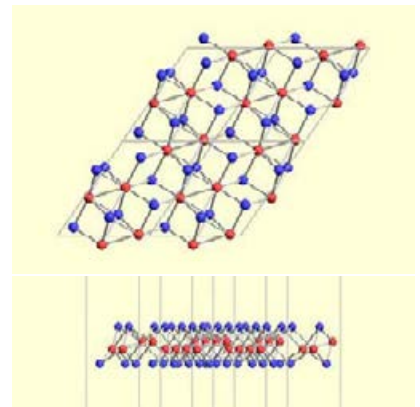

TaTe<sub>2</sub> (P)

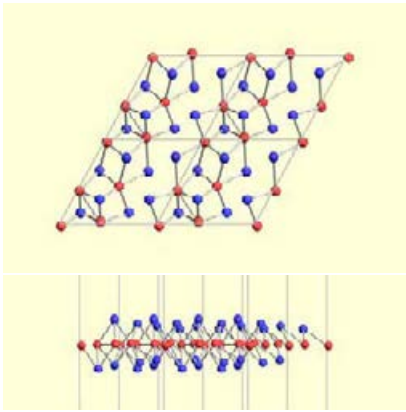

TaI<sub>2</sub> (T)

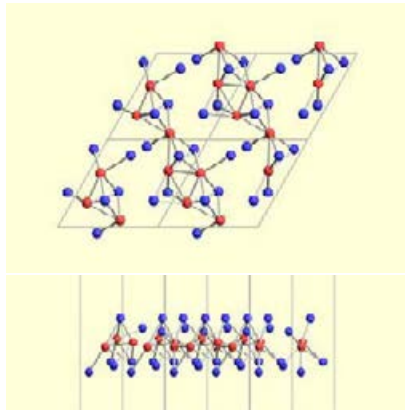

TaI<sub>2</sub> (H)

×

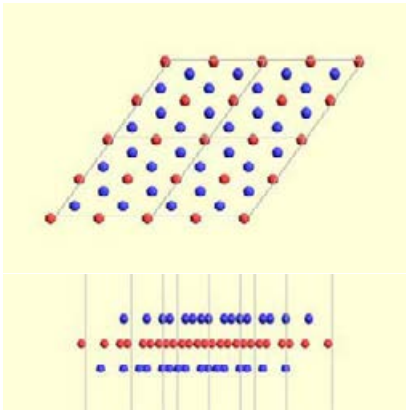

TaBi<sub>2</sub> (T)

×

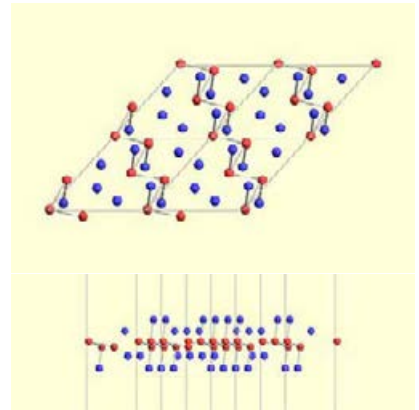

TaBi<sub>2</sub> (P)

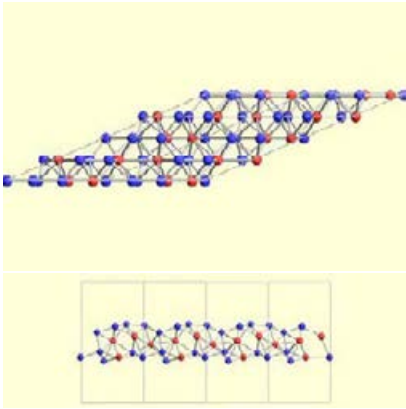

WBe<sub>2</sub> (T)

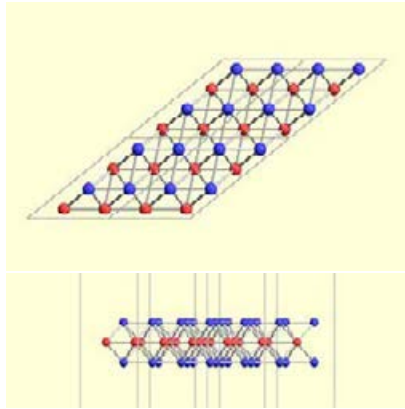

WBe<sub>2</sub> (H)

×

×

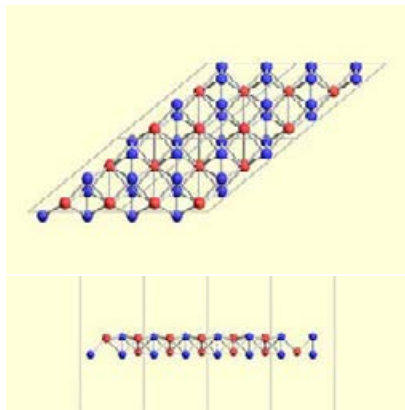

WB<sub>2</sub> (H)

×



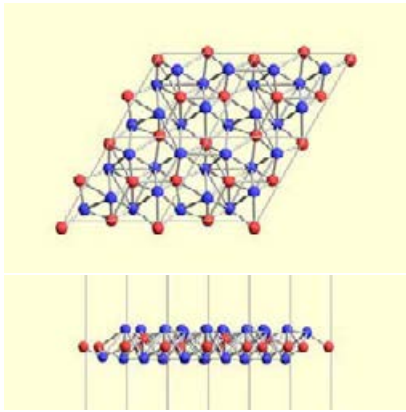

WN<sub>2</sub> (T)

×

×

×

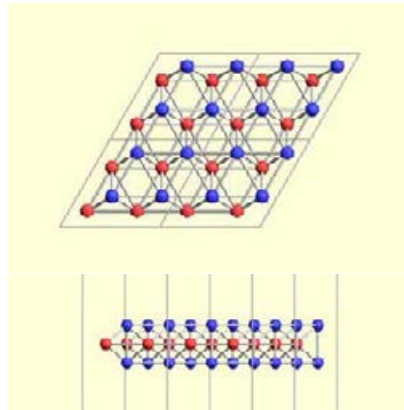

WO<sub>2</sub> (H)

×

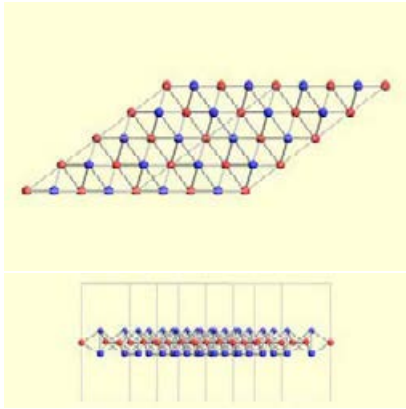

WAl<sub>2</sub> (T)

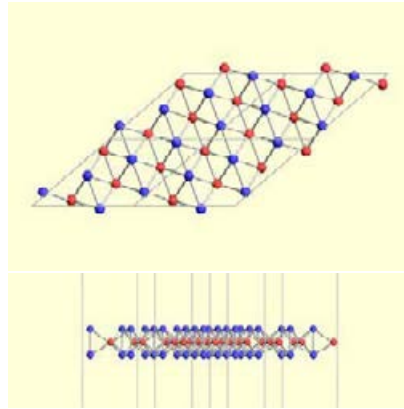

WAl<sub>2</sub> (H)

×

×

×

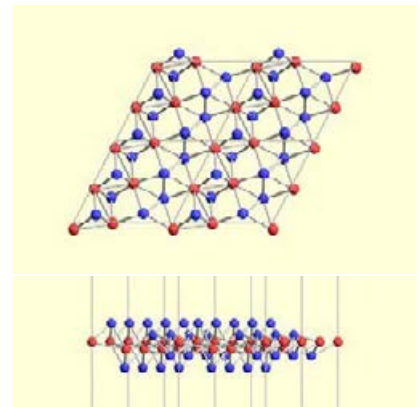

WP<sub>2</sub> (P)

×

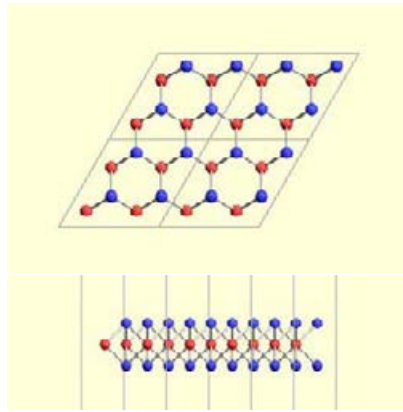

WS<sub>2</sub> (H)

×

×

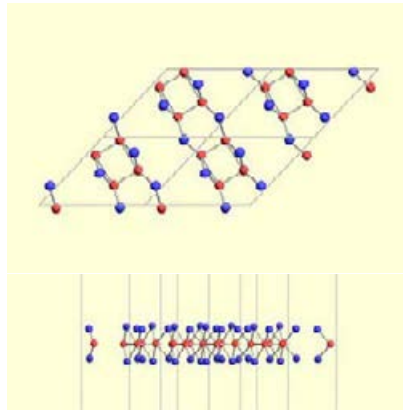

WCl<sub>2</sub> (H)

×

×

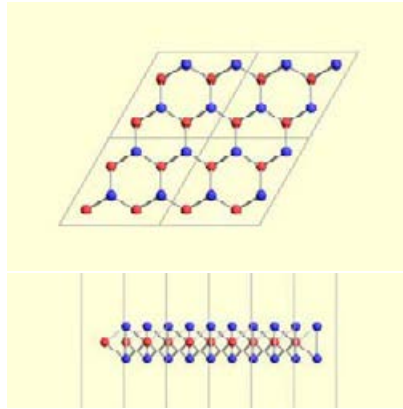

WAs<sub>2</sub> (H)

×

×

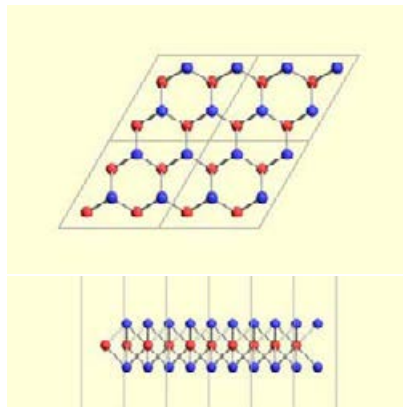

WSe<sub>2</sub> (H)

×

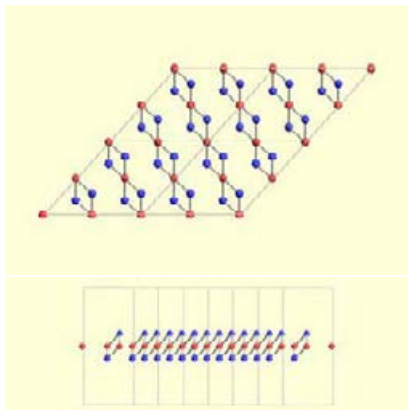

WBr<sub>2</sub> (T)

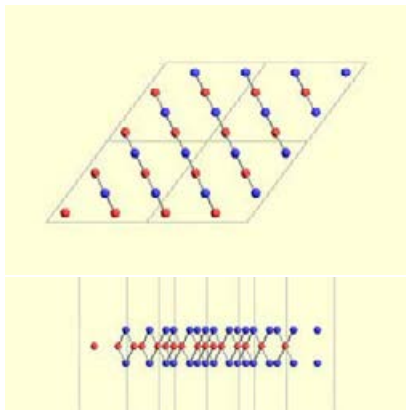

WBr<sub>2</sub> (H)

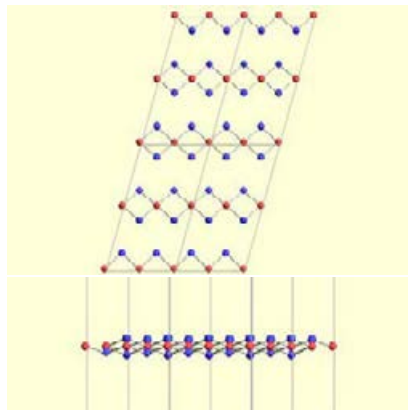

WBr<sub>2</sub> (P)

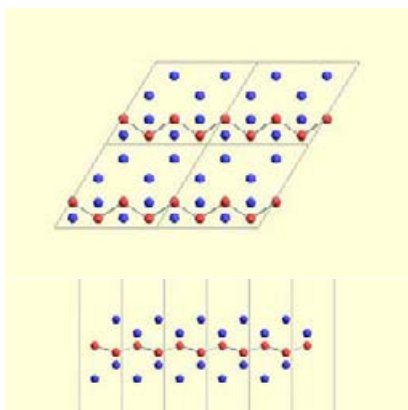

WSr<sub>2</sub> (T)

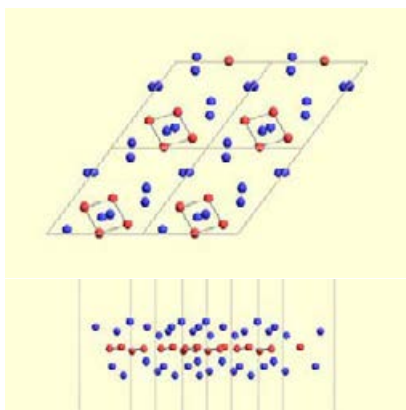

WSr<sub>2</sub> (H)

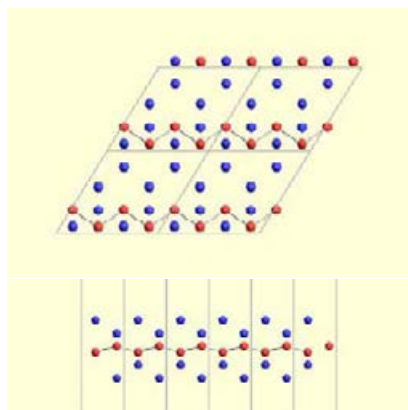

WSr<sub>2</sub> (P)

×

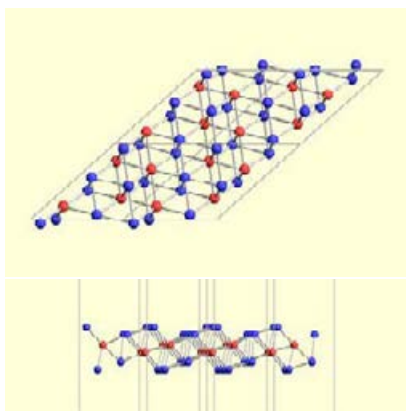

WNb<sub>2</sub> (H)

×

×

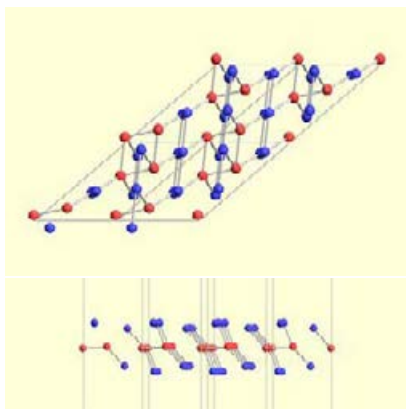

WSn<sub>2</sub> (H)

×

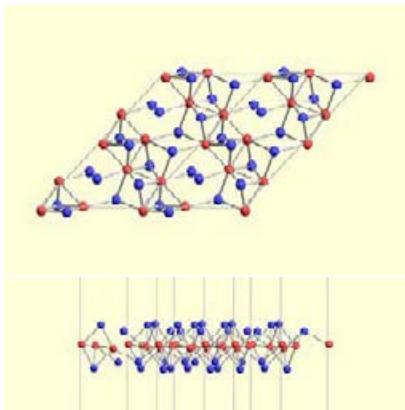

WSb<sub>2</sub> (T)

×

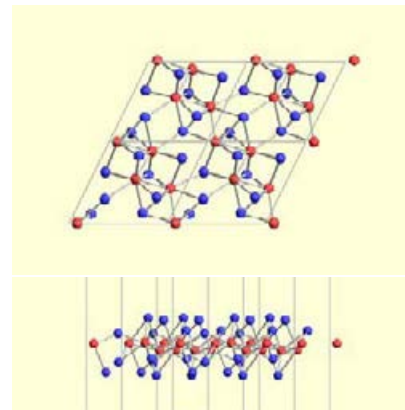

WSb<sub>2</sub> (P)

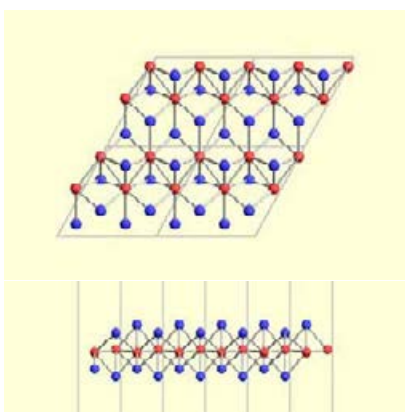

WTe<sub>2</sub> (T)

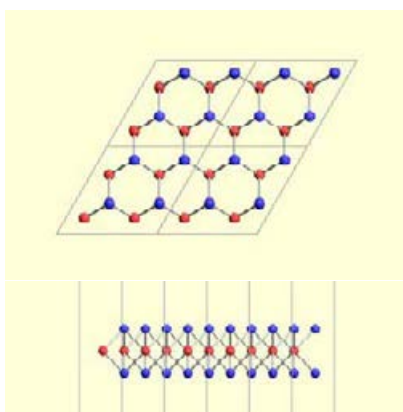

WTe<sub>2</sub> (H)

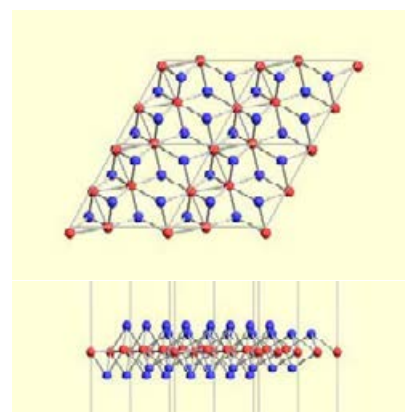

WTe<sub>2</sub> (P)

×

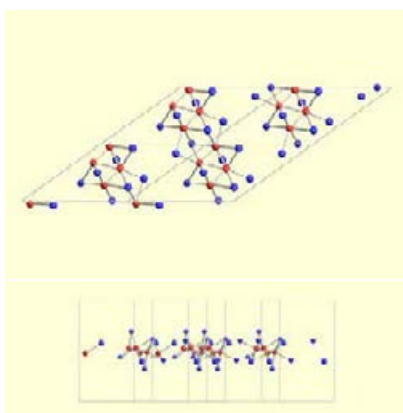

WI<sub>2</sub> (H)

×

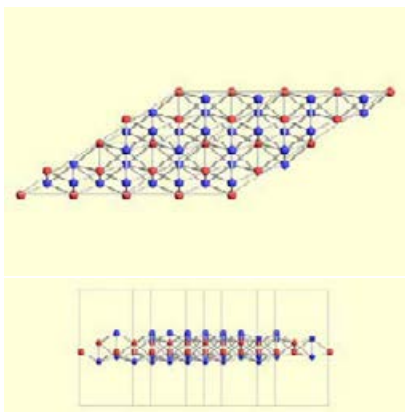

WTa<sub>2</sub> (T)

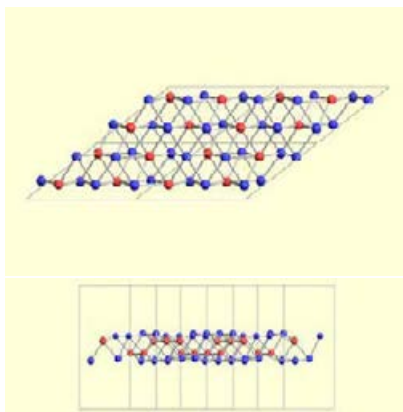

WTa<sub>2</sub> (H)

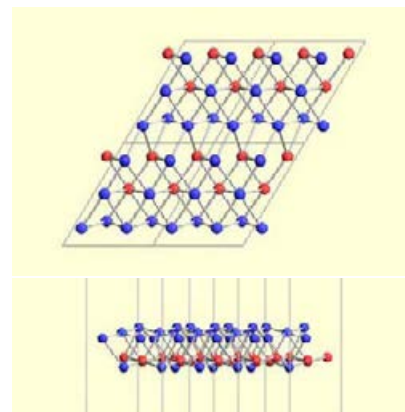

WTa<sub>2</sub> (P)

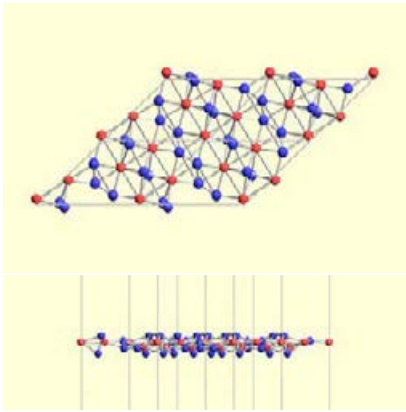

ReB<sub>2</sub> (T)

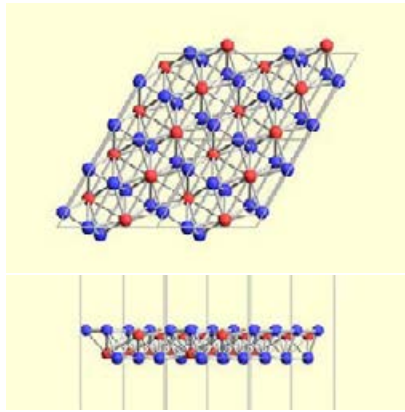

ReB<sub>2</sub> (H)

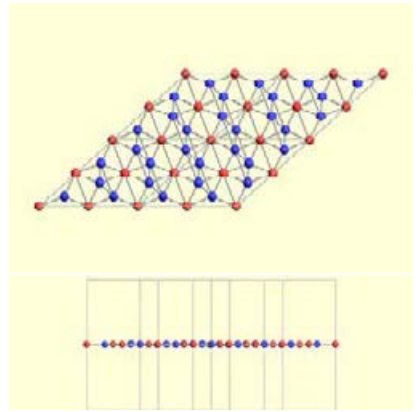

ReB<sub>2</sub> (P)

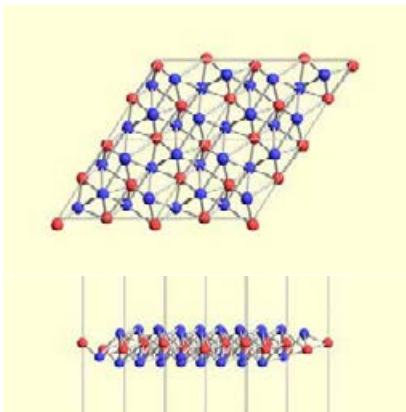

ReN<sub>2</sub> (T)

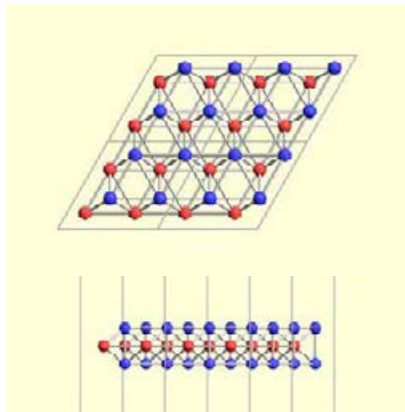

ReN<sub>2</sub> (H)

×

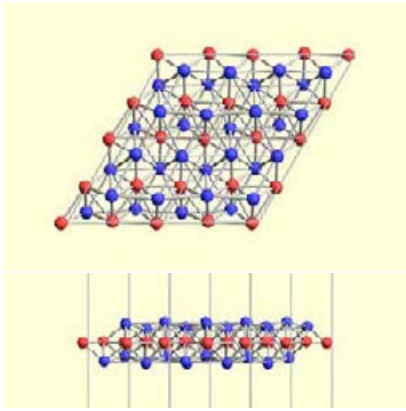

ReO<sub>2</sub> (T)

×

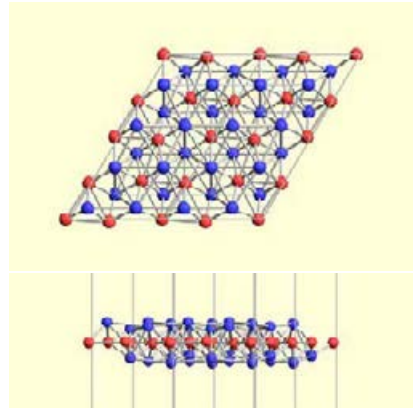

ReO<sub>2</sub> (P)

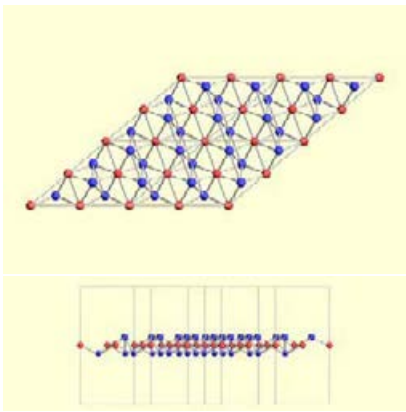

ReSi<sub>2</sub> (T)

×

×



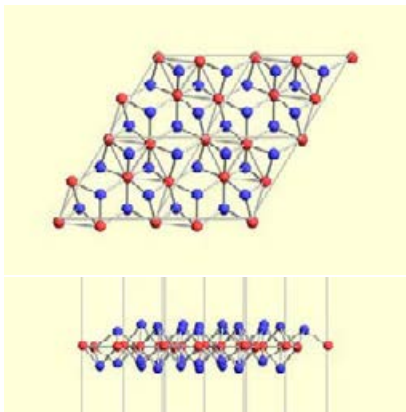

ReS<sub>2</sub> (T)

×

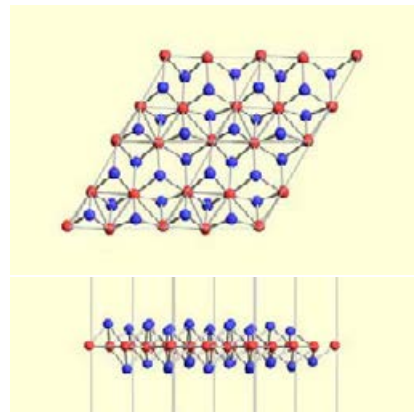

ReS<sub>2</sub> (P)

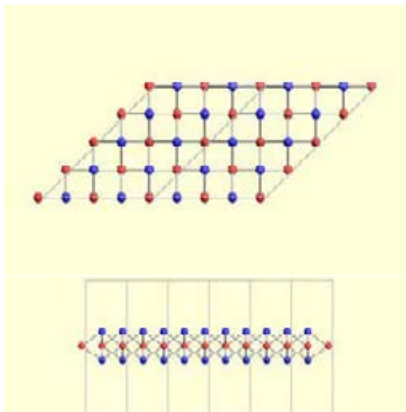

ReSc<sub>2</sub> (T)

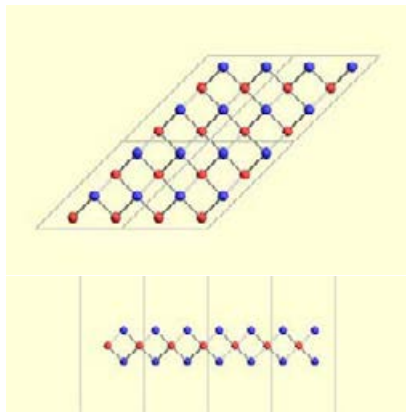

ReSc<sub>2</sub> (H)

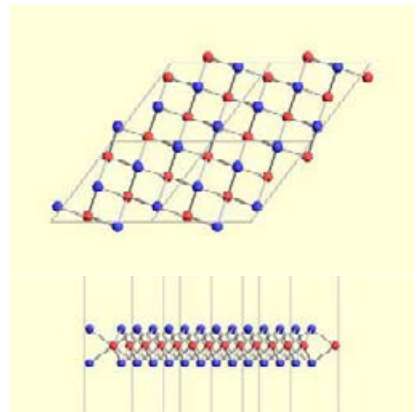

ReSc<sub>2</sub> (P)

×

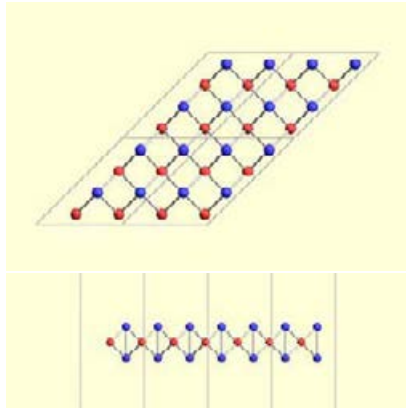

ReTi<sub>2</sub> (H)

×

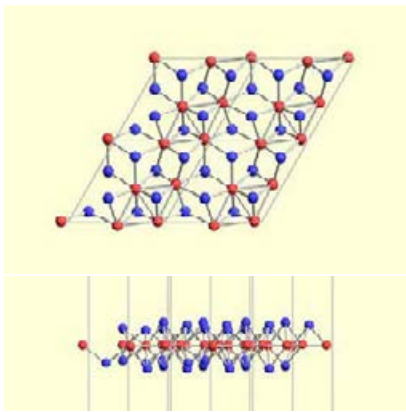

ReSe<sub>2</sub> (T)

×

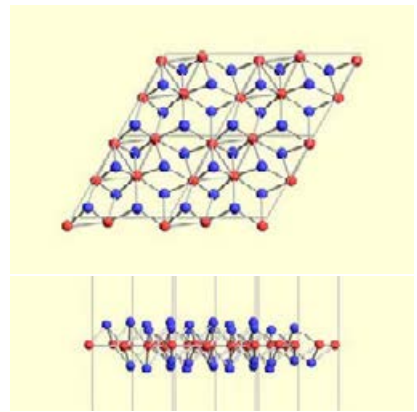

ReSe<sub>2</sub> (P)

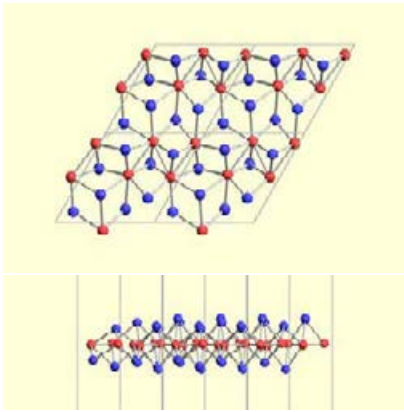

ReTe<sub>2</sub> (T)

×

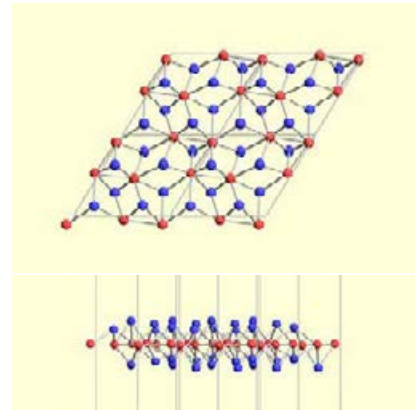

ReTe<sub>2</sub> (P)

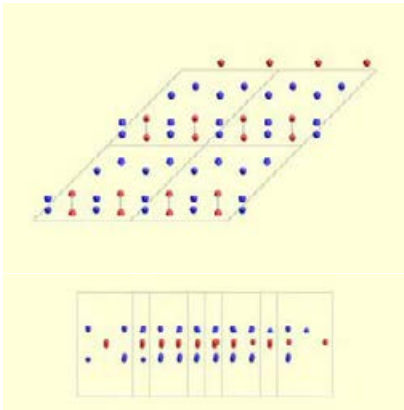

ReCs<sub>2</sub> (T)

×

×

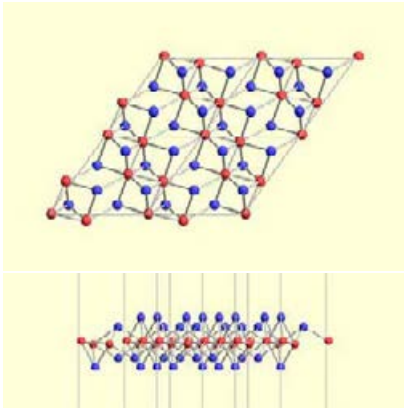

ReBi<sub>2</sub> (T)

×

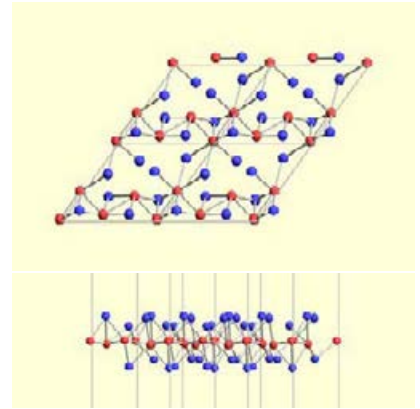

ReBi<sub>2</sub> (P)

×

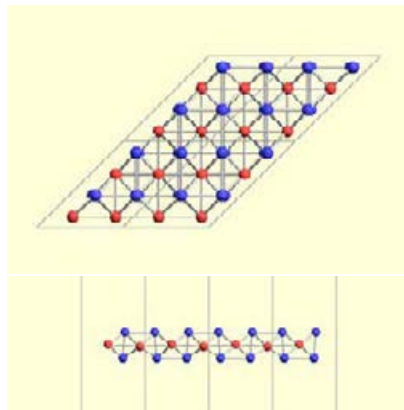

OsBe<sub>2</sub> (H)

×

×

×

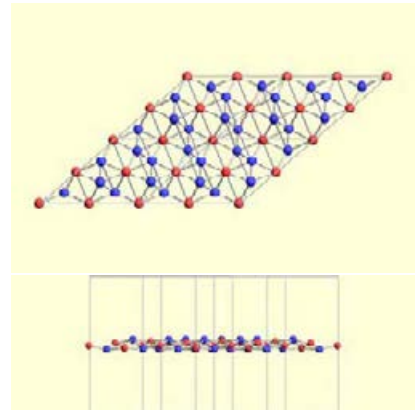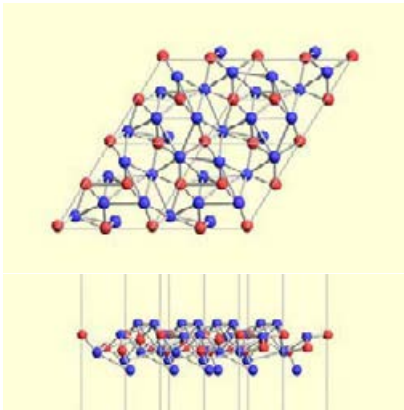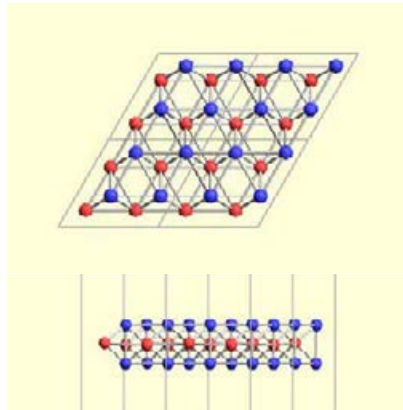

×

×

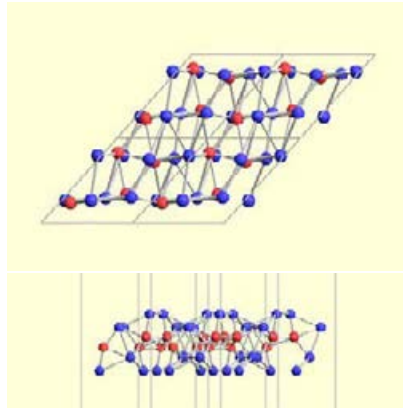

×

×

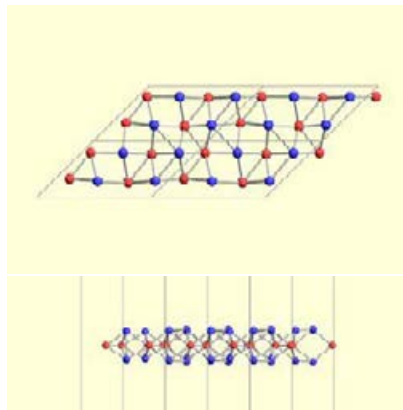

×

×

×

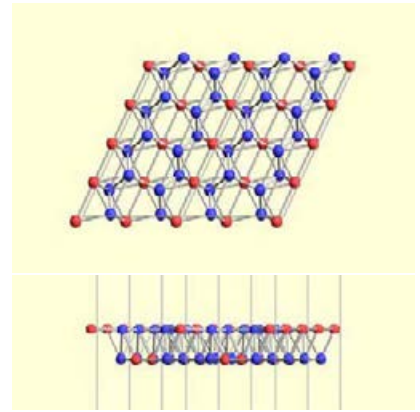

OsSi<sub>2</sub> (P)

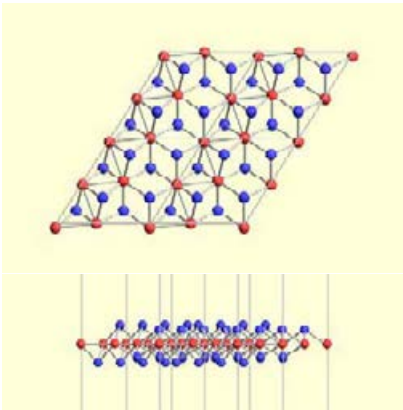

OsS<sub>2</sub> (T)

×

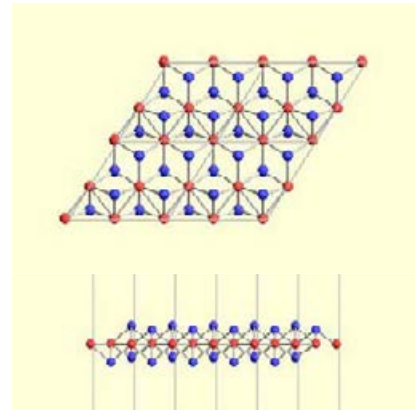

OsS<sub>2</sub> (P)

×

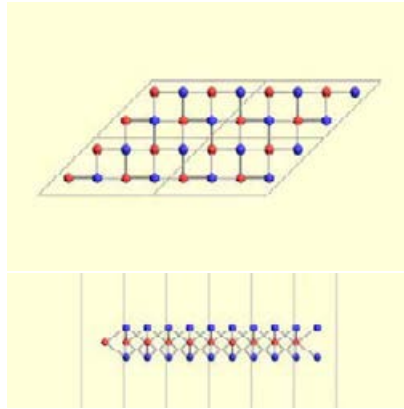

OsSc<sub>2</sub> (H)

×

×

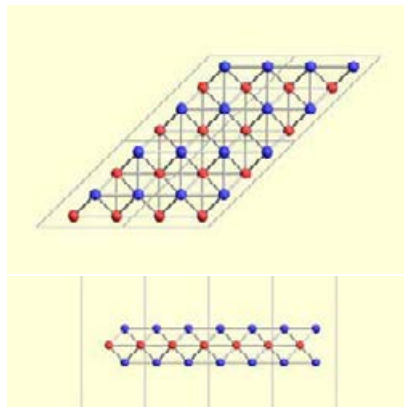

OsTi<sub>2</sub> (H)

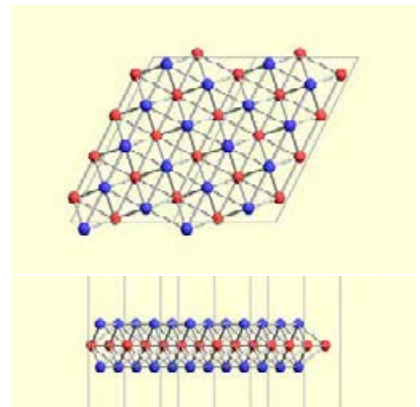

OsTi<sub>2</sub> (P)

×

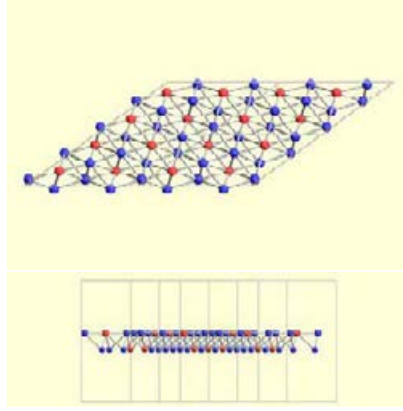

×

×

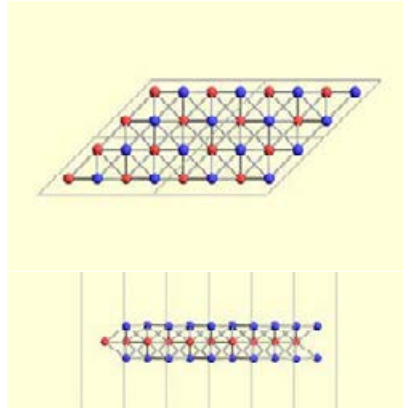

×

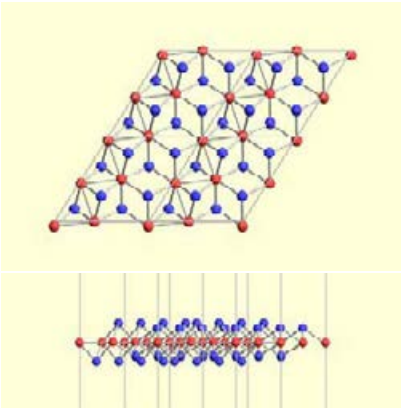

×

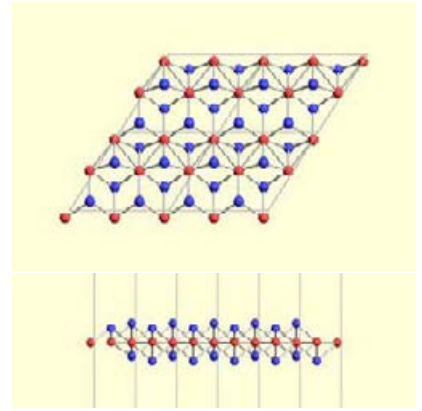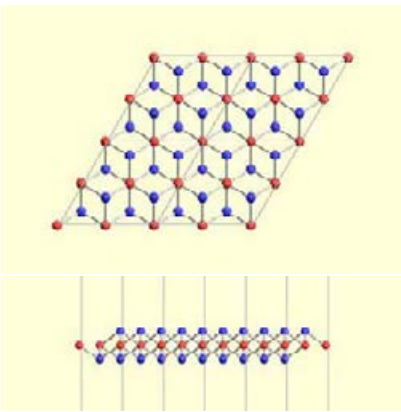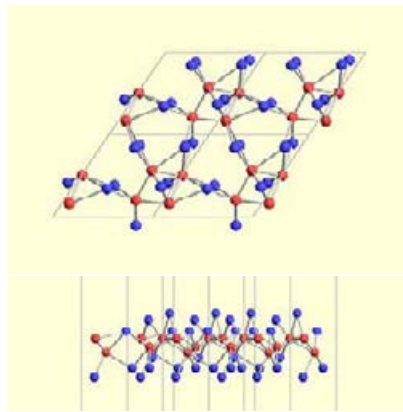

×

OsSe<sub>2</sub> (T)

OsSe<sub>2</sub> (P)

OsBr<sub>2</sub> (T)

OsBr<sub>2</sub> (H)



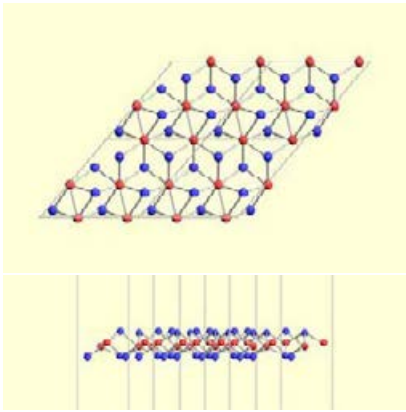

OsZr<sub>2</sub> (T)

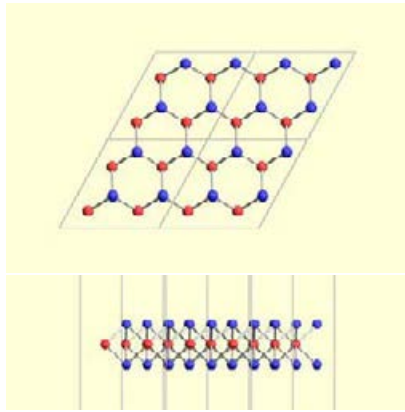

OsZr<sub>2</sub> (H)

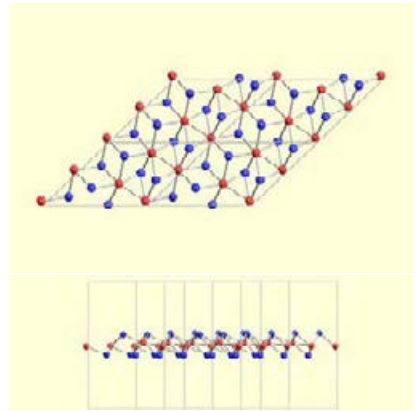

OsZr<sub>2</sub> (P)

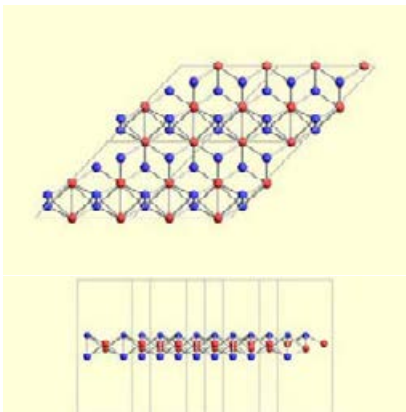

OsNb<sub>2</sub> (T)

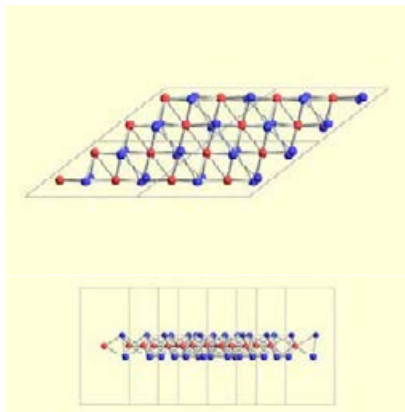

OsNb<sub>2</sub> (H)

×

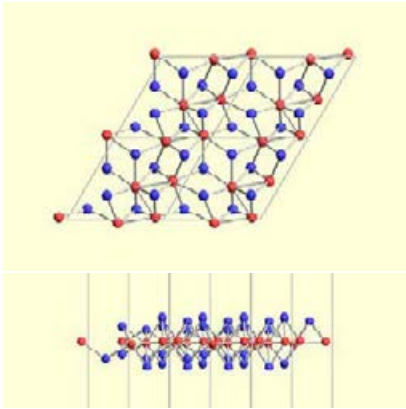

OsSb<sub>2</sub> (T)

×

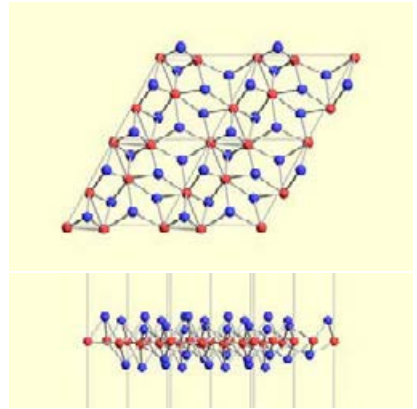

OsSb<sub>2</sub> (P)

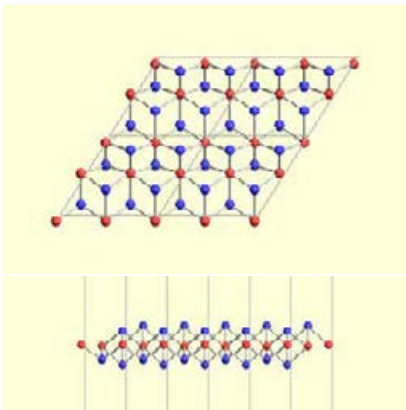

OsTe<sub>2</sub> (T)

×

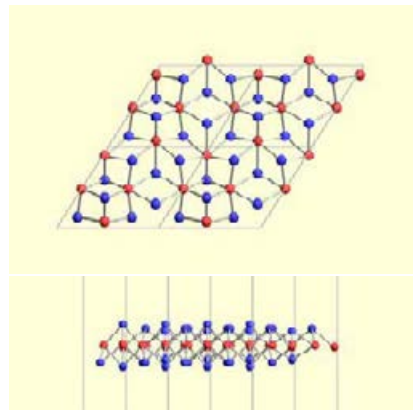

OsTe<sub>2</sub> (P)

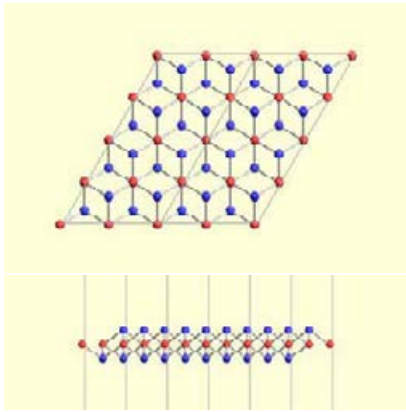

OsI<sub>2</sub> (T)

×

×

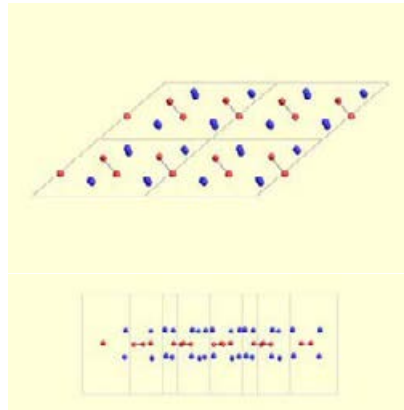

OsCs<sub>2</sub> (H)

×

×

×

×

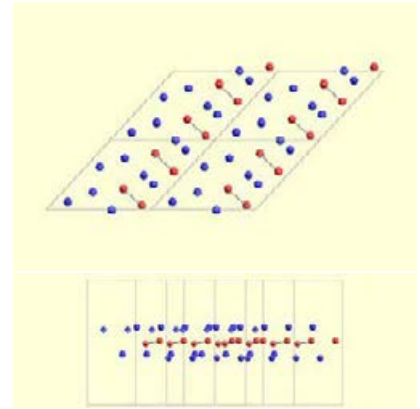

OsBa<sub>2</sub> (P)

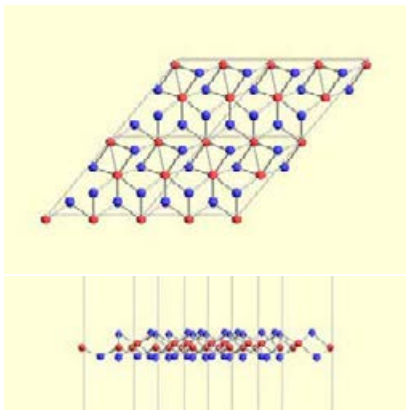

OsHf<sub>2</sub> (T)

×

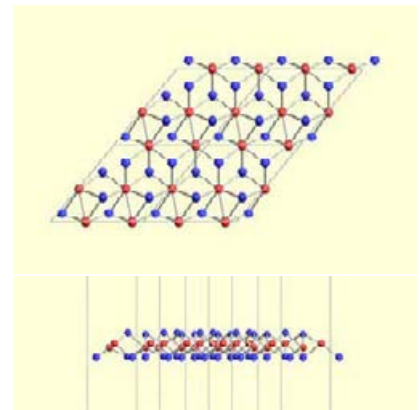

OsHf<sub>2</sub> (P)

×

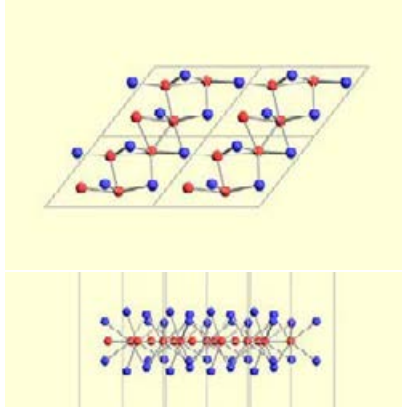

×

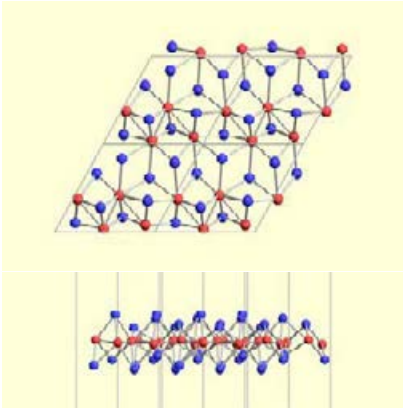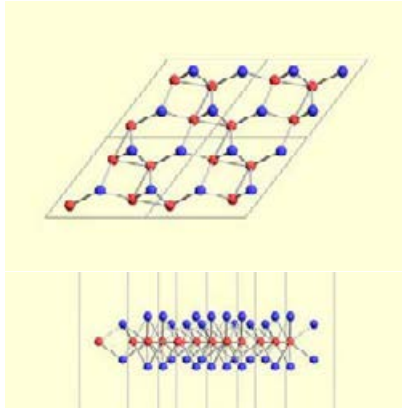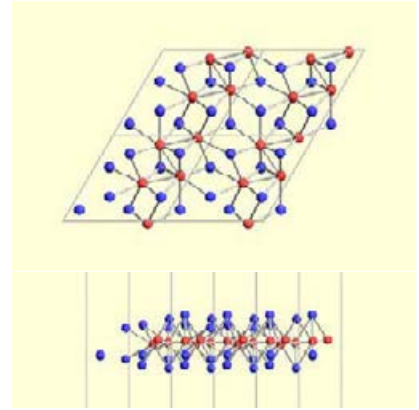

×

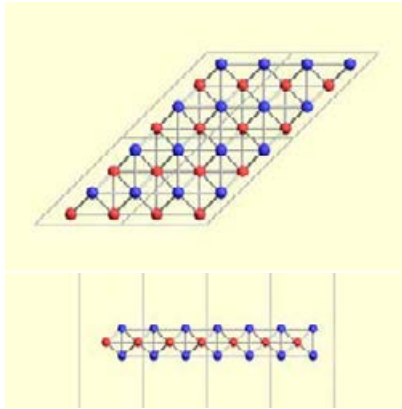

×

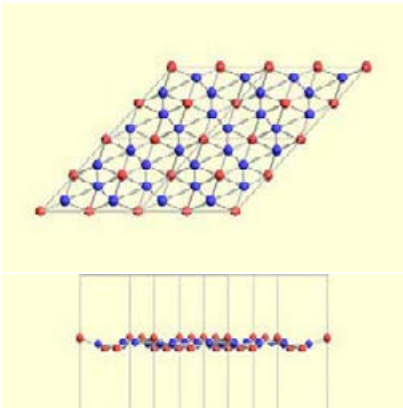

×

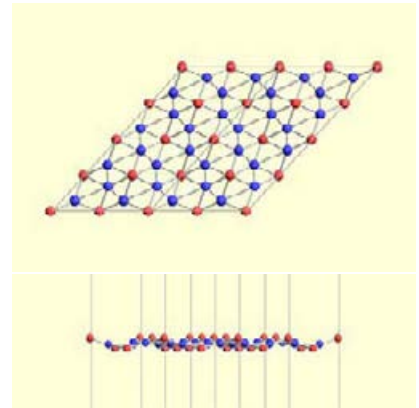

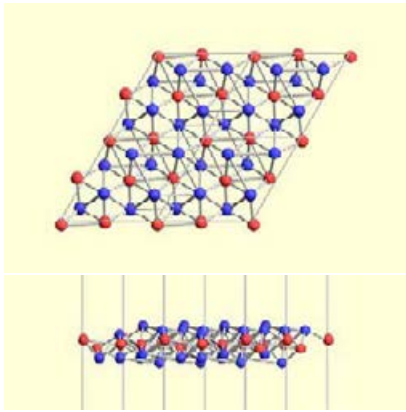

IrN<sub>2</sub> (T)

×

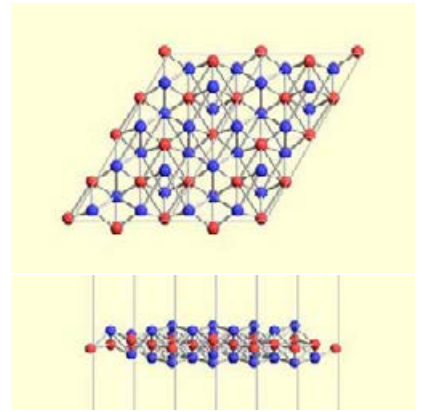

IrN<sub>2</sub> (P)

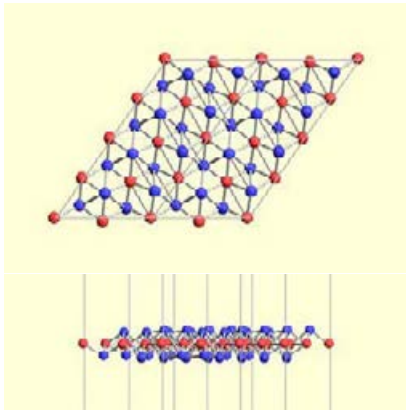

IrO<sub>2</sub> (T)

×

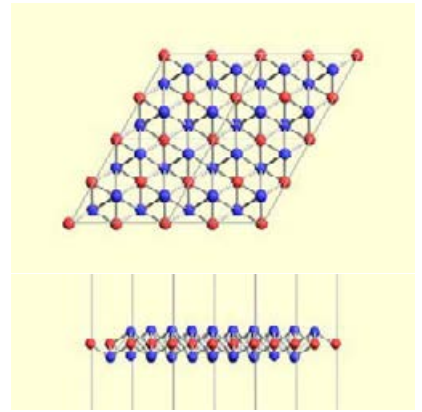

IrO<sub>2</sub> (P)

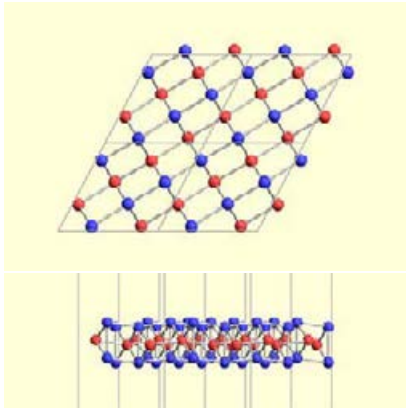

IrF<sub>2</sub> (T)

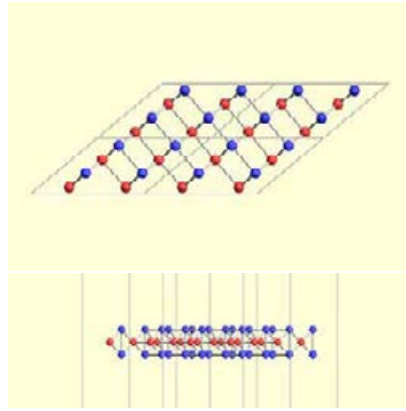

IrF<sub>2</sub> (H)

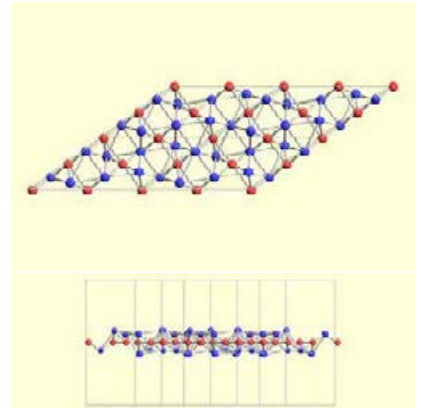

IrF<sub>2</sub> (P)

×

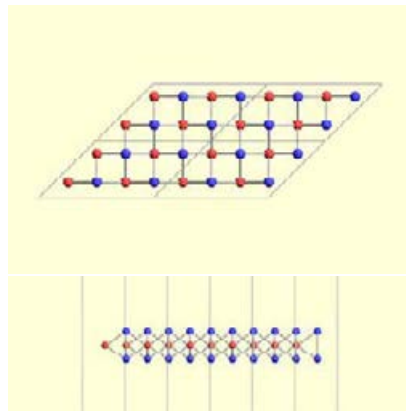

IrMg<sub>2</sub> (H)

×

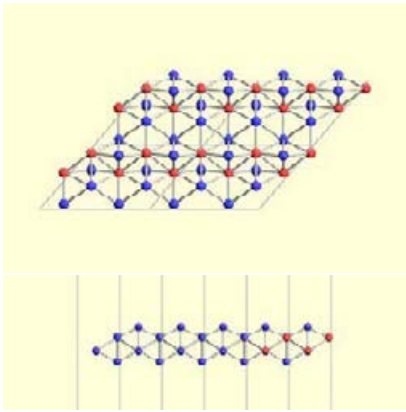

IrAl<sub>2</sub> (T)

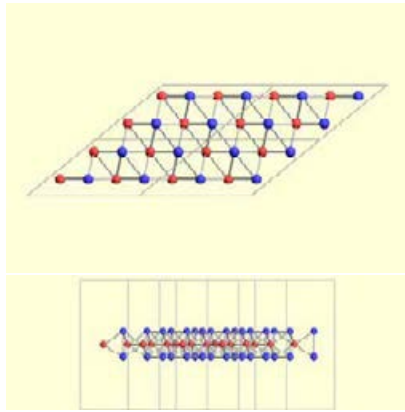

IrAl<sub>2</sub> (H)

×

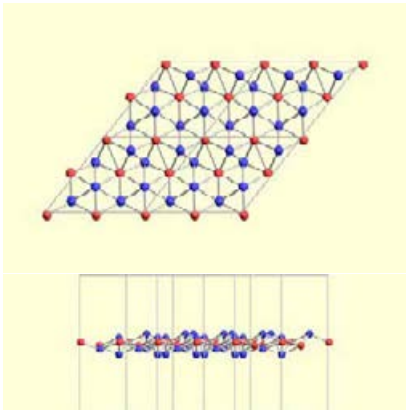

IrSi<sub>2</sub> (T)

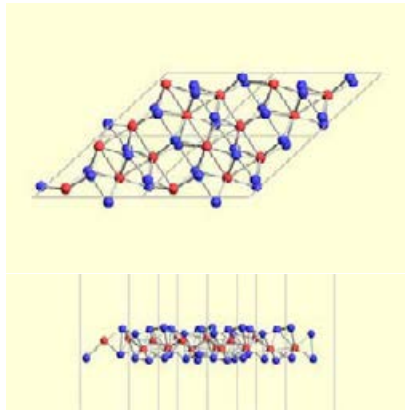

IrSi<sub>2</sub> (H)

×

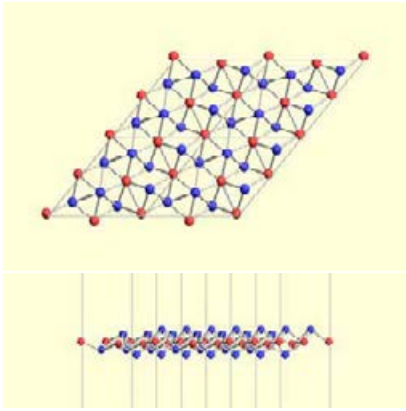

IrP<sub>2</sub> (T)

×

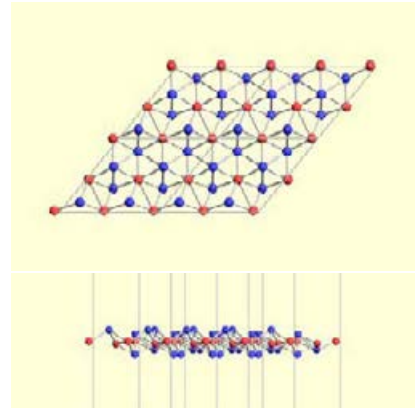

IrP<sub>2</sub> (P)

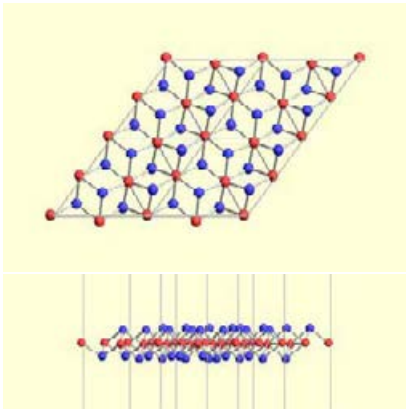

IrS<sub>2</sub> (T)

×

×



×

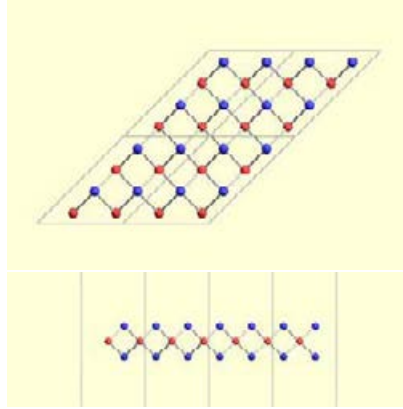

IrCa<sub>2</sub> (H)

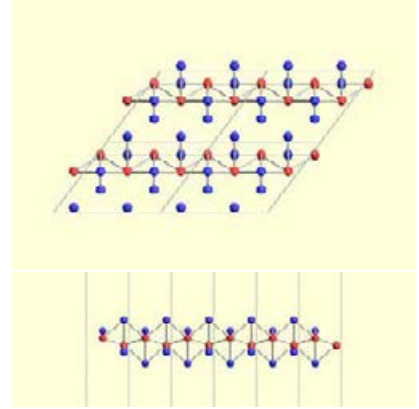

IrCa<sub>2</sub> (P)

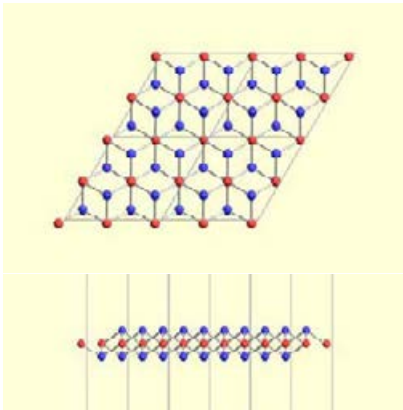

IrSc<sub>2</sub> (T)

×

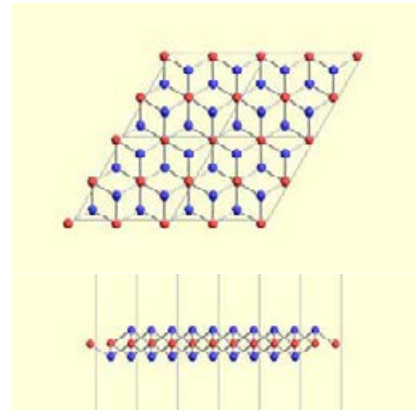

IrSc<sub>2</sub> (P)

×

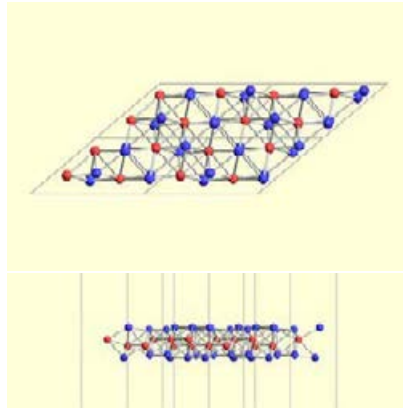

IrTi<sub>2</sub> (H)

×

×

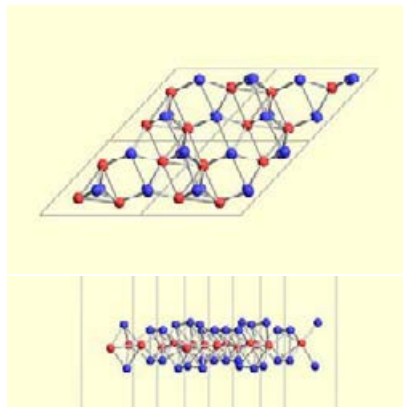

IrGe<sub>2</sub> (H)

×

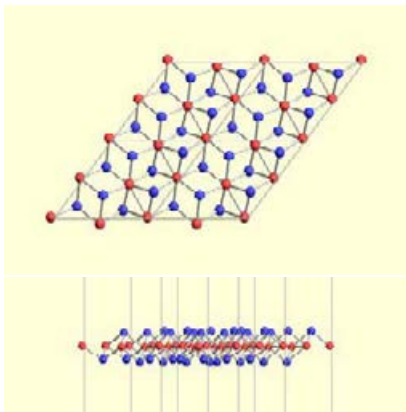

IrSe<sub>2</sub> (T)

×

×

×

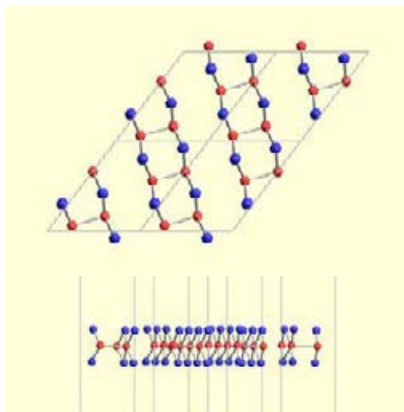

IrBr<sub>2</sub> (H)

×

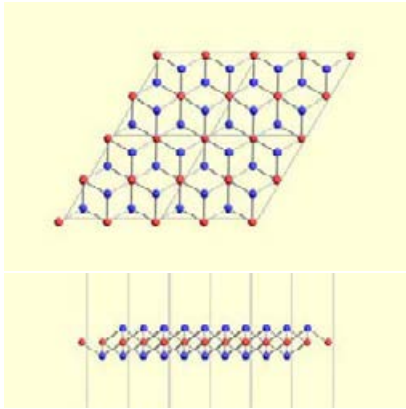

IrSr<sub>2</sub> (T)

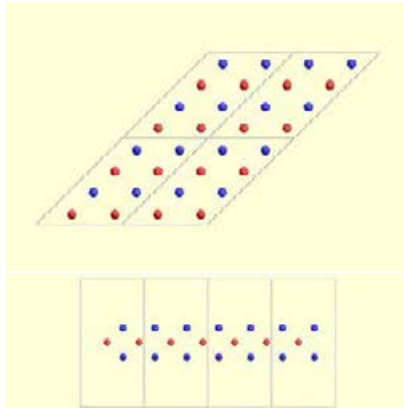

IrSr<sub>2</sub> (H)

×

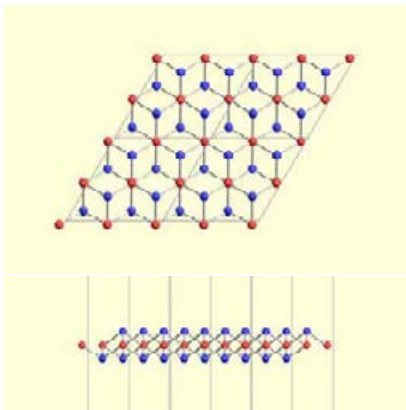

IrY<sub>2</sub> (T)

×

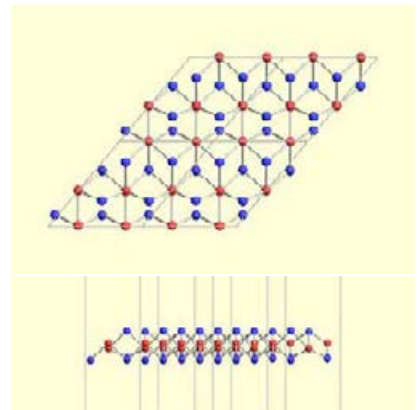

IrY<sub>2</sub> (P)

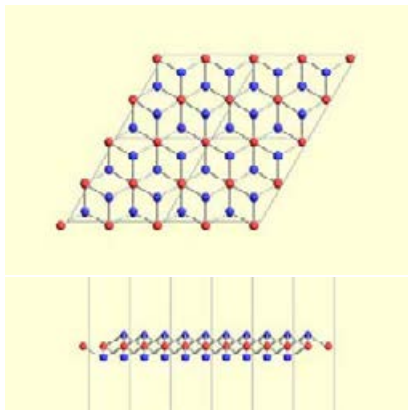

IrZr<sub>2</sub> (T)

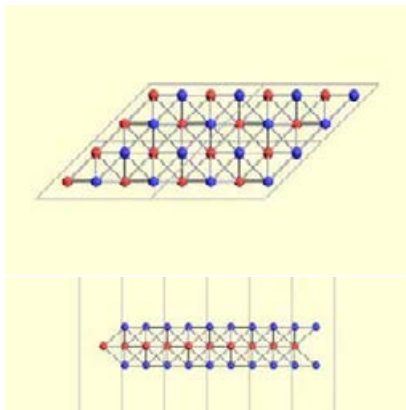

IrZr<sub>2</sub> (H)

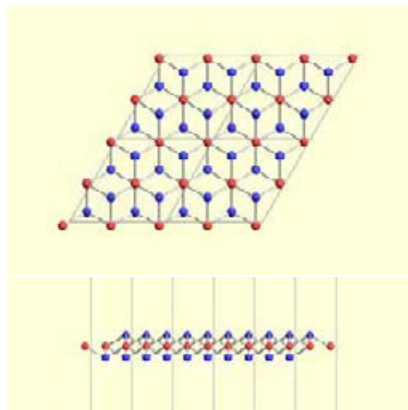

IrZr<sub>2</sub> (P)

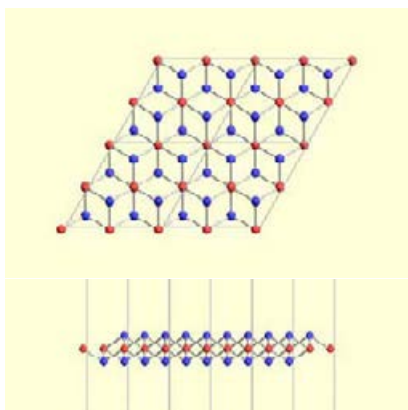

IrIn<sub>2</sub> (T)

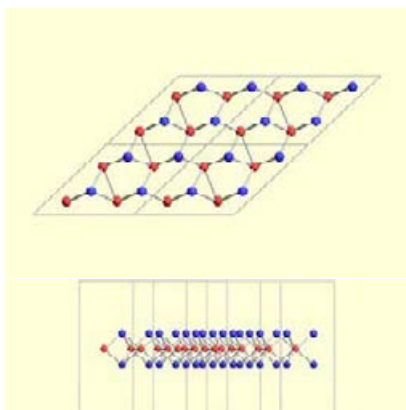

IrIn<sub>2</sub> (H)

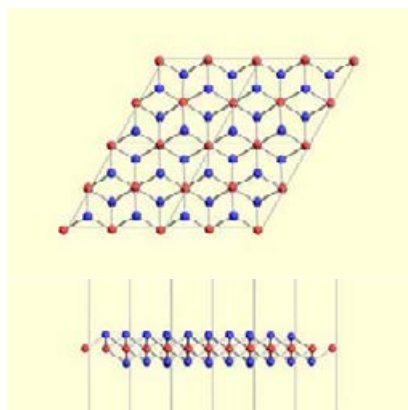

IrIn<sub>2</sub> (P)

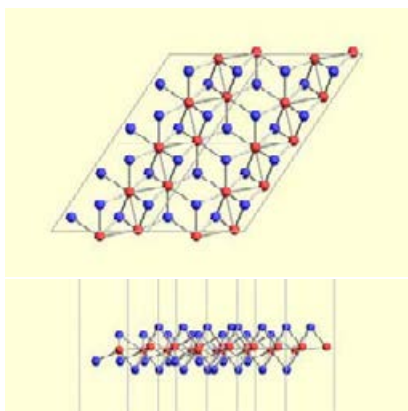

IrSb<sub>2</sub> (T)

×

×

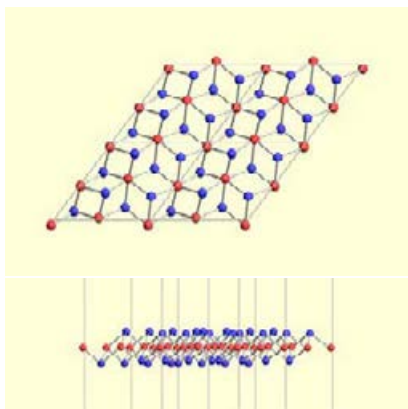

IrTe<sub>2</sub> (T)

×

×

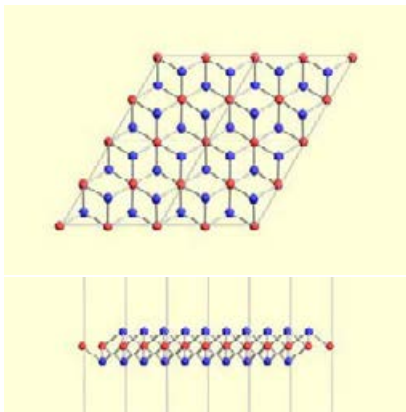

IrI<sub>2</sub> (T)

×

×

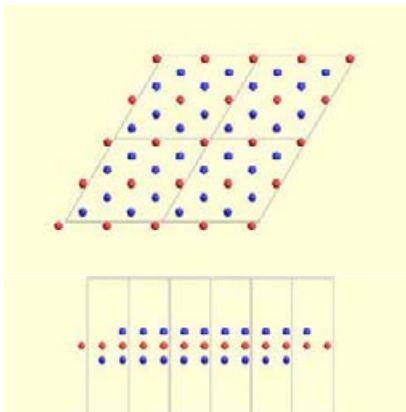

IrBa<sub>2</sub> (T)

×

×

×

×

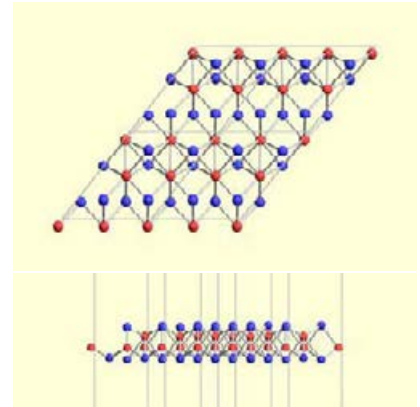

IrHf<sub>2</sub> (P)

×

×

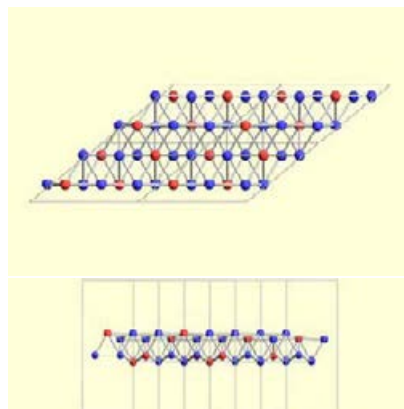

IrOs<sub>2</sub> (H)

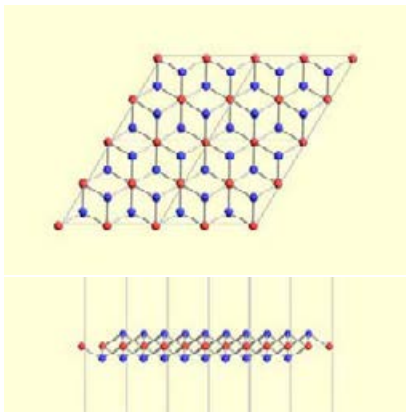

IrTi<sub>2</sub> (T)

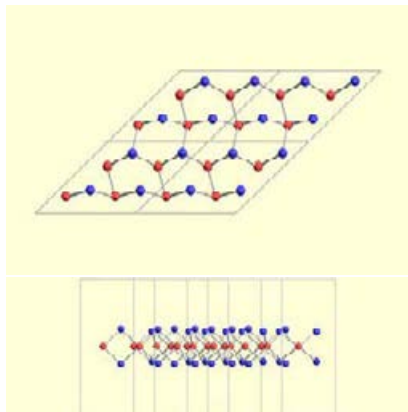

IrTi<sub>2</sub> (H)

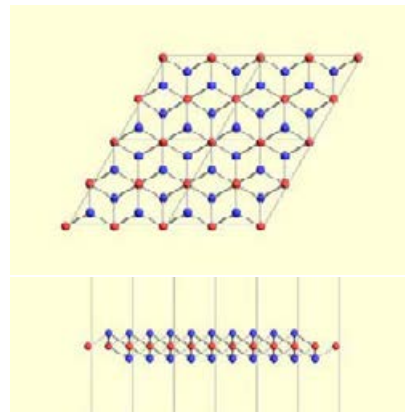

IrTi<sub>2</sub> (P)

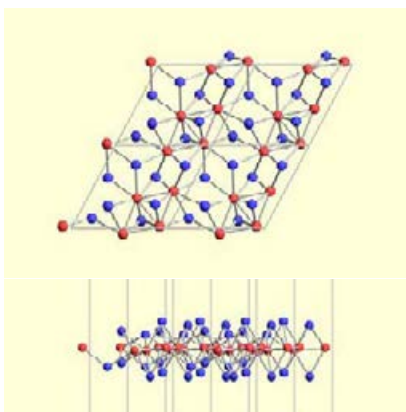

IrPb<sub>2</sub> (T)

×

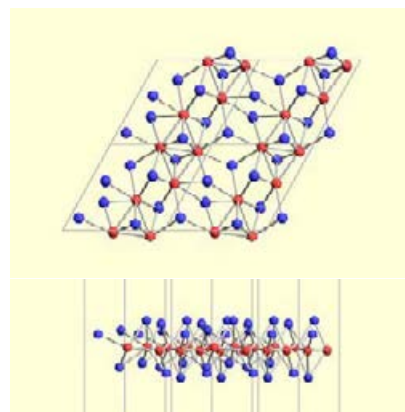

IrPb<sub>2</sub> (P)

×

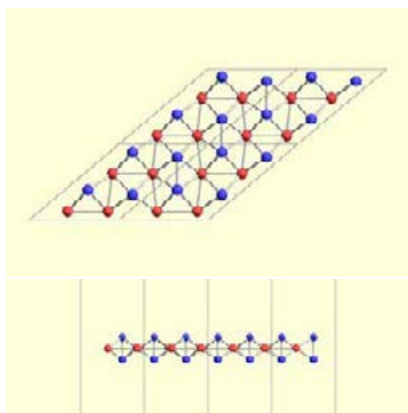

PtBe<sub>2</sub> (H)

×

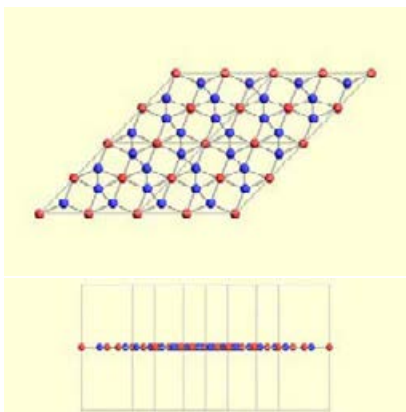

PtB<sub>2</sub> (T)

×

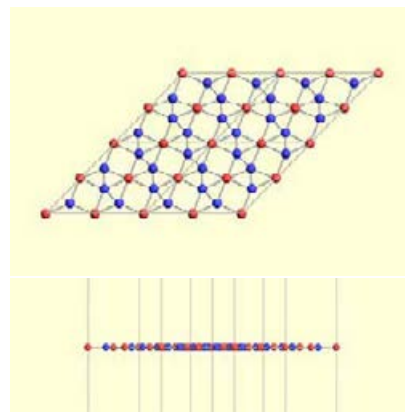

PtB<sub>2</sub> (P)



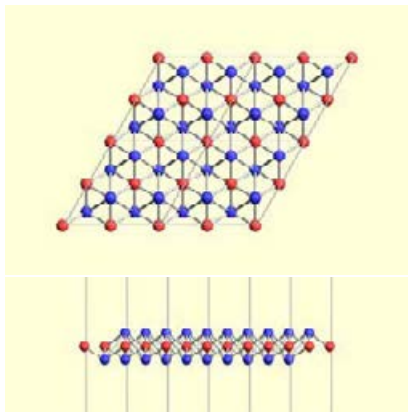

PtO<sub>2</sub> (T)

×

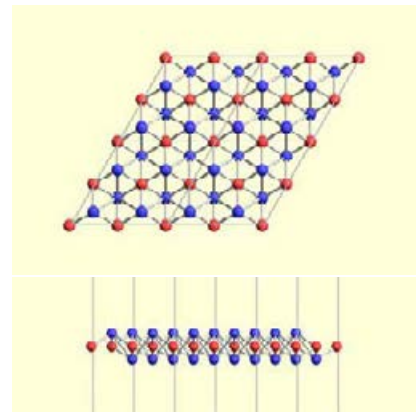

PtO<sub>2</sub> (P)

×

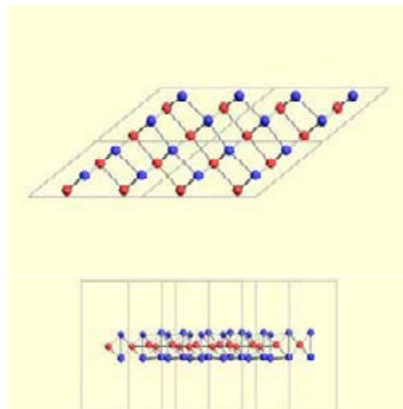

PtF<sub>2</sub> (H)

×

×

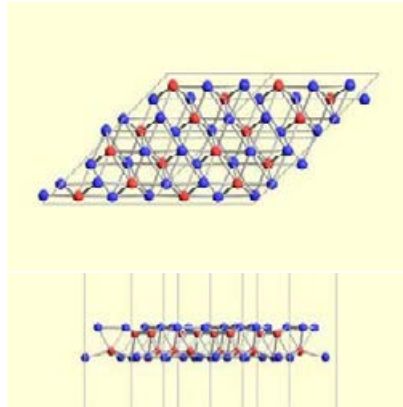

PtAl<sub>2</sub> (H)

×

×

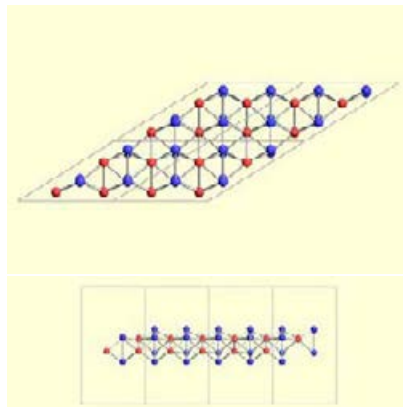

PtSi<sub>2</sub> (H)

×

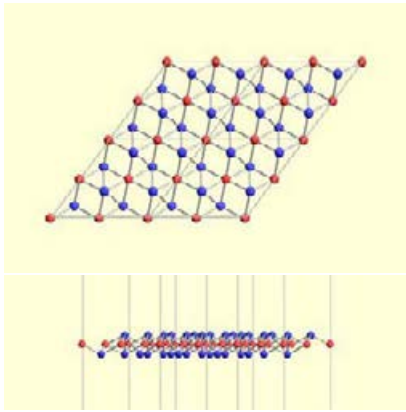

PtP<sub>2</sub> (T)

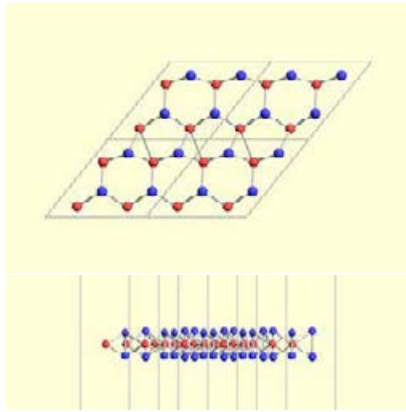

PtP<sub>2</sub> (H)

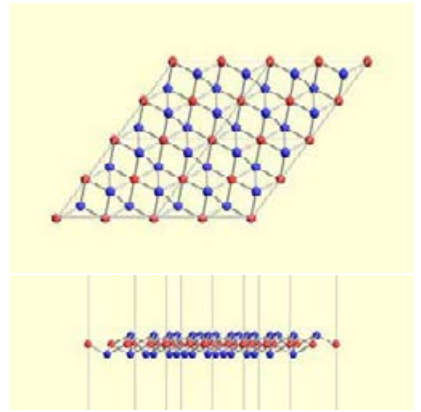

PtP<sub>2</sub> (P)

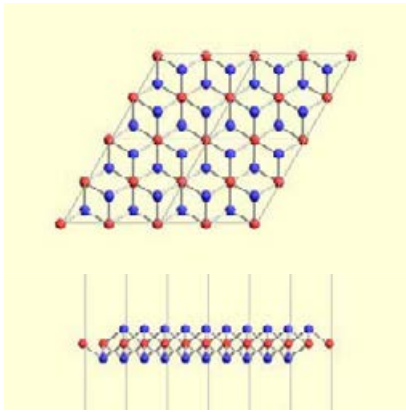

PtS<sub>2</sub> (T)

×

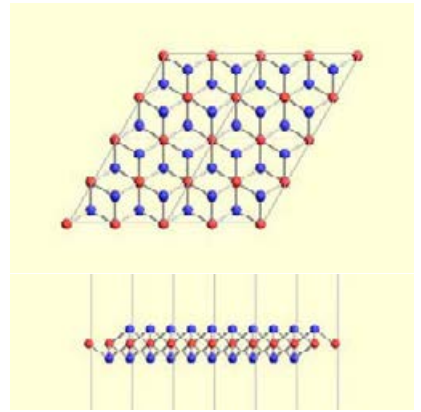

PtS<sub>2</sub> (P)

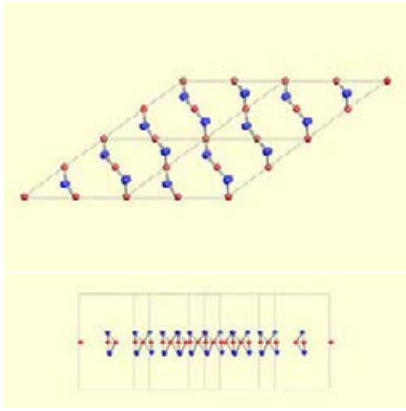

PtCl<sub>2</sub> (T)

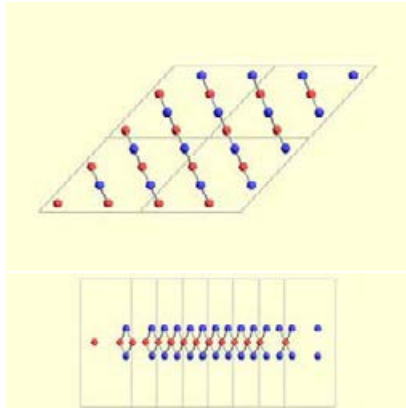

PtCl<sub>2</sub> (H)

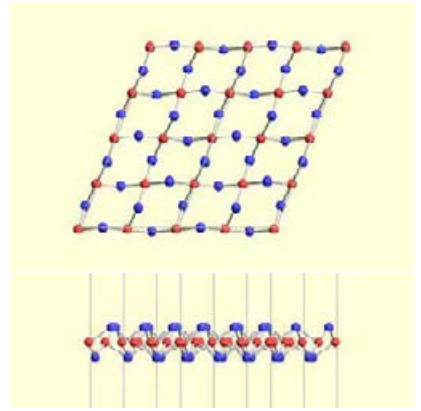

PtCl<sub>2</sub> (P)

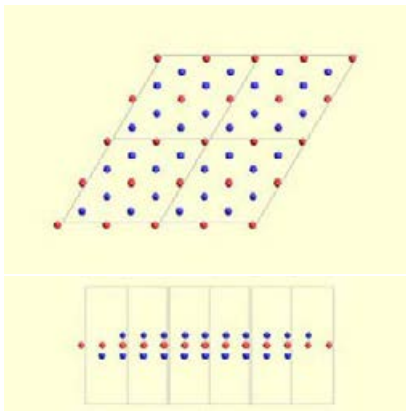

PtK<sub>2</sub> (T)

×

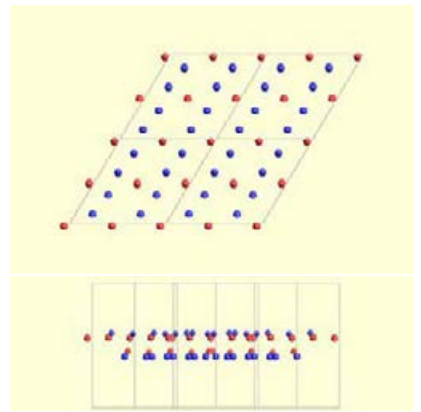

PtK<sub>2</sub> (P)

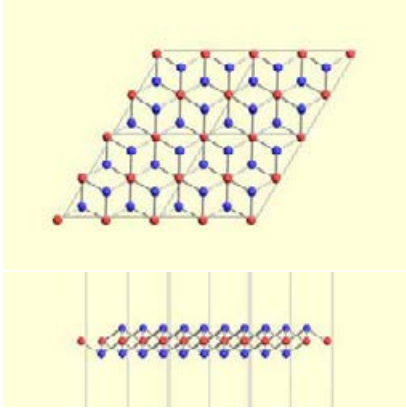

PtSc<sub>2</sub> (T)

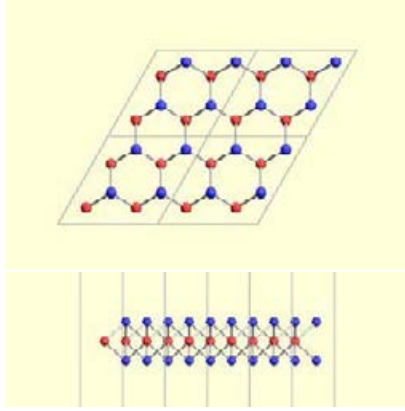

PtSc<sub>2</sub> (H)

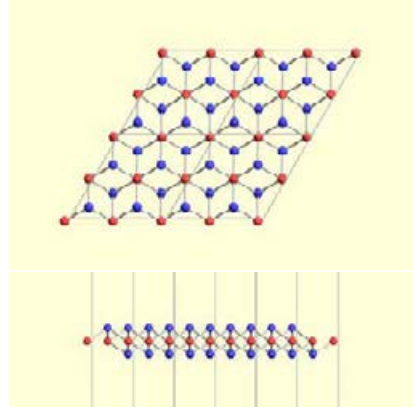

PtSc<sub>2</sub> (P)

×

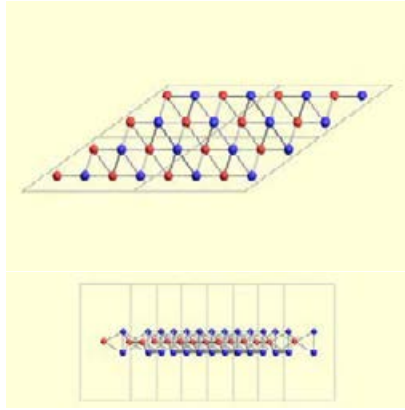

PtTi<sub>2</sub> (H)

×

×

×

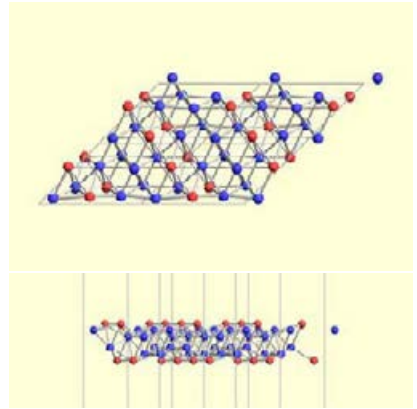

PtV<sub>2</sub> (P)

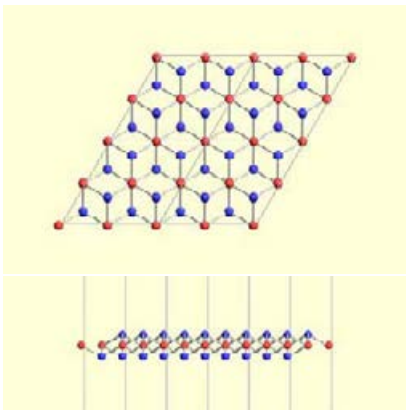

PtGa<sub>2</sub> (T)

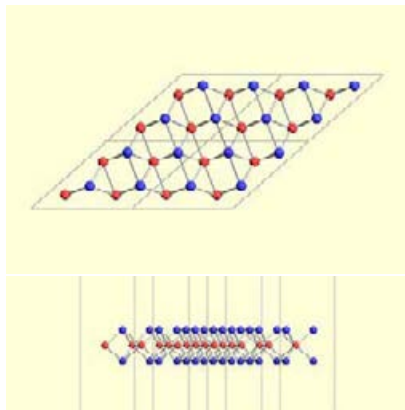

PtGa<sub>2</sub> (H)

×

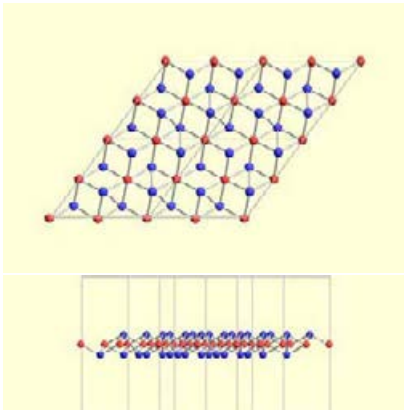

PtAs<sub>2</sub> (T)

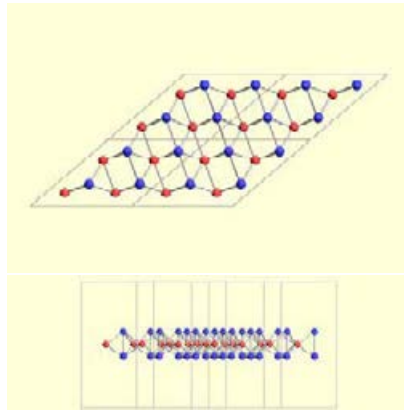

PtAs<sub>2</sub> (H)

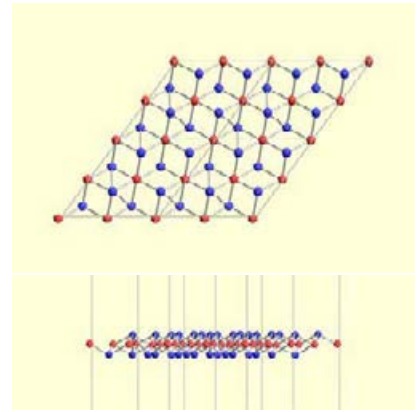

PtAs<sub>2</sub> (P)

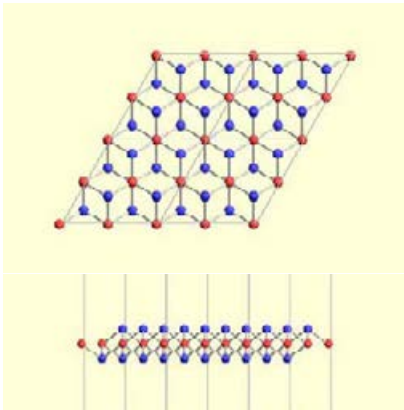

PtSe<sub>2</sub> (T)

×

×

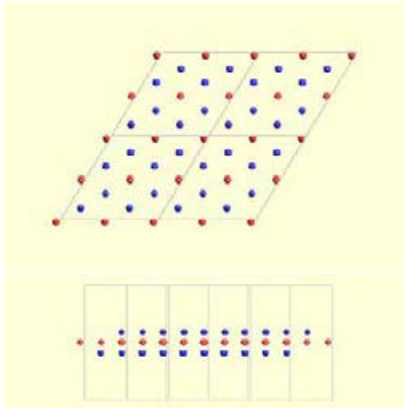

PtRb<sub>2</sub> (T)

×

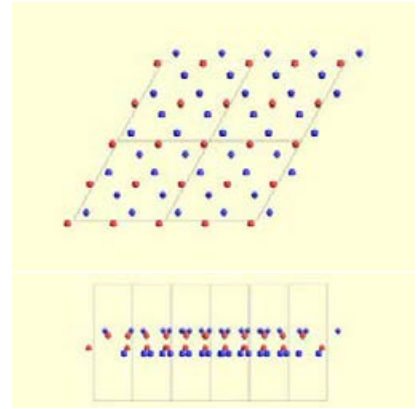

PtRb<sub>2</sub> (P)

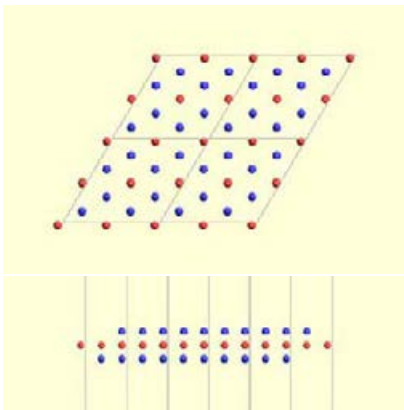

PtSr<sub>2</sub> (T)

×

×

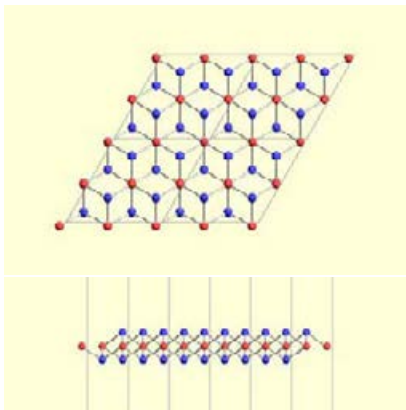

PtY<sub>2</sub> (T)

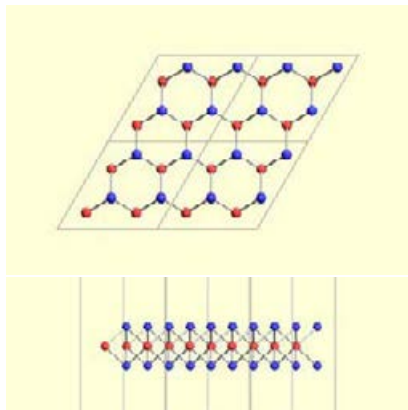

PtY<sub>2</sub> (H)

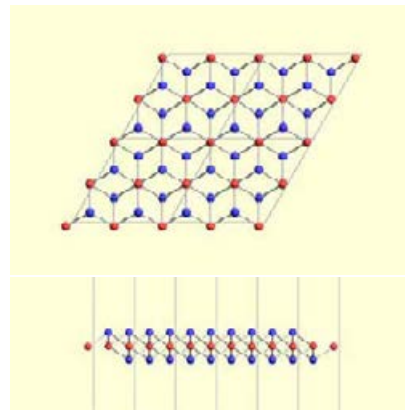

PtY<sub>2</sub> (P)

×

×

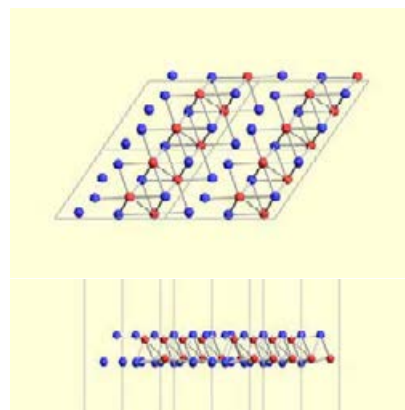

PtZr<sub>2</sub> (P)

×

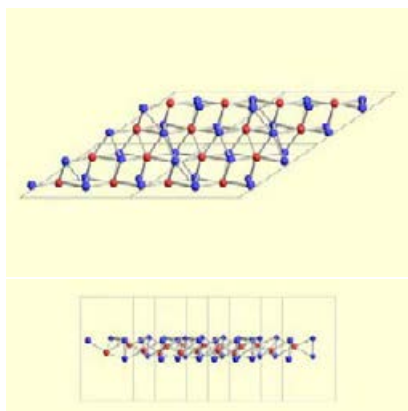

PtNb<sub>2</sub> (H)

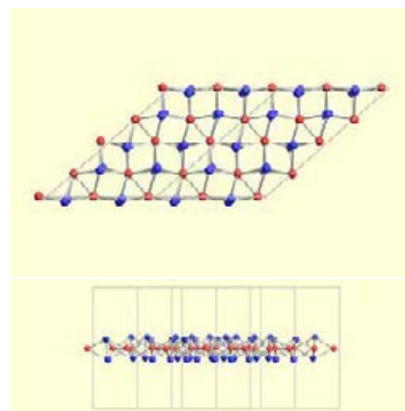

PtNb<sub>2</sub> (P)

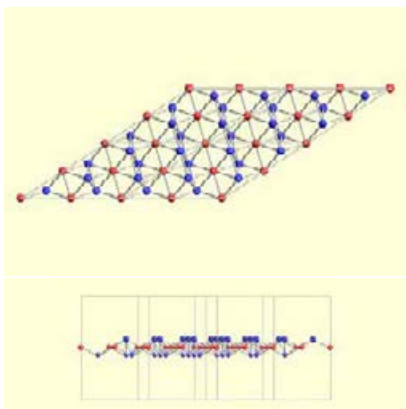

PtRu<sub>2</sub> (T)

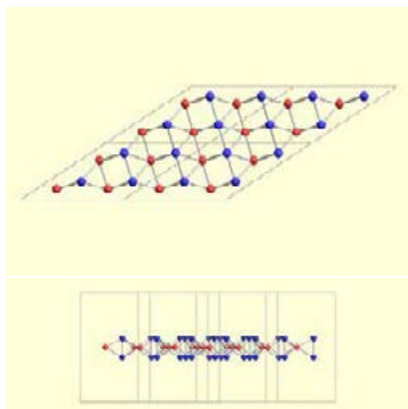

PtRu<sub>2</sub> (H)

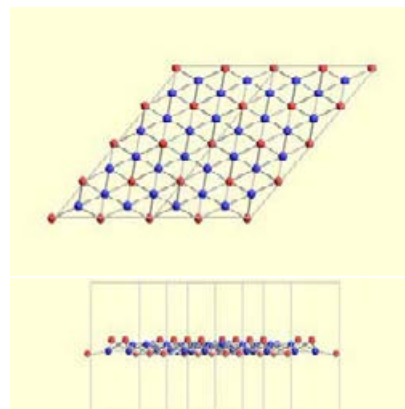

PtRu<sub>2</sub> (P)



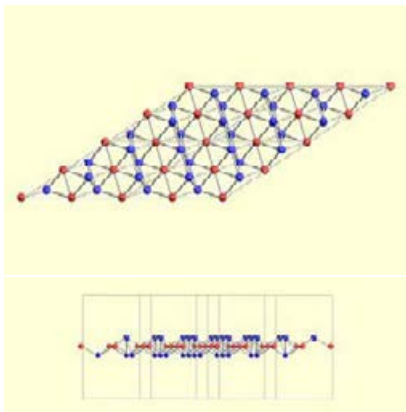

PtRh<sub>2</sub> (T)

×

×

×

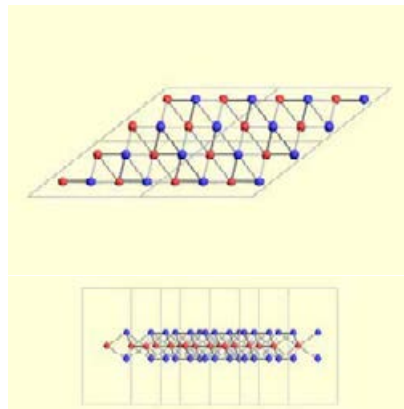

PtCd<sub>2</sub> (H)

×

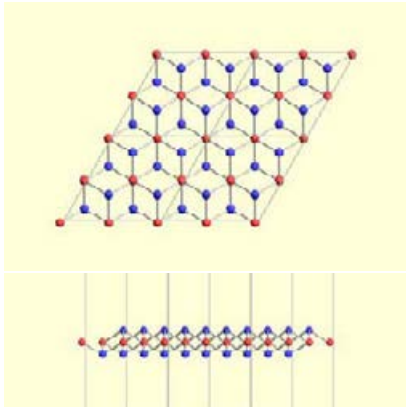

PtIn<sub>2</sub> (T)

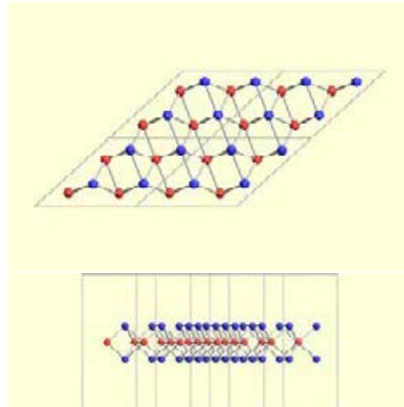

PtIn<sub>2</sub> (H)

×

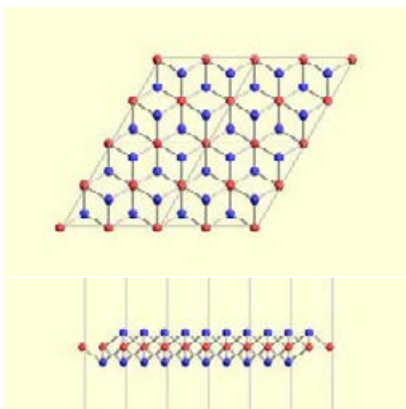

PtTe<sub>2</sub> (T)

×

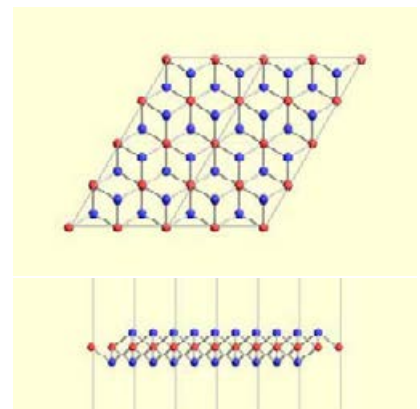

PtTe<sub>2</sub> (P)

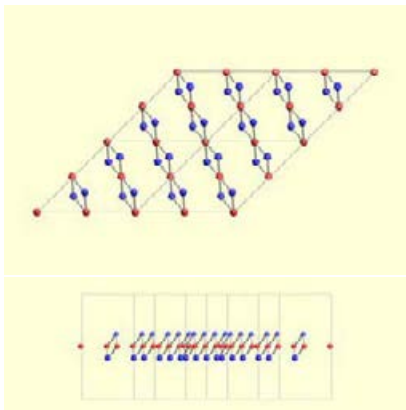

PtI<sub>2</sub> (T)

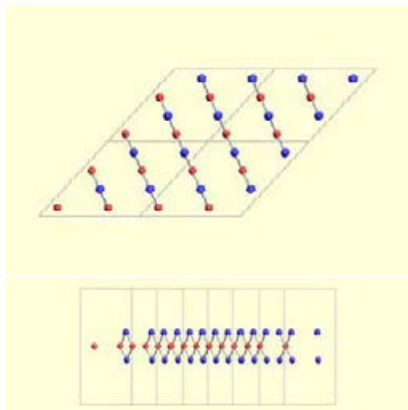

PtI<sub>2</sub> (H)

×

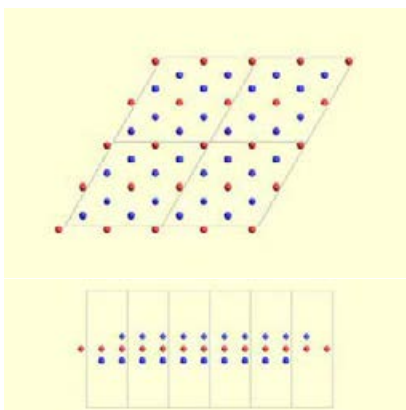

PtCs<sub>2</sub> (T)

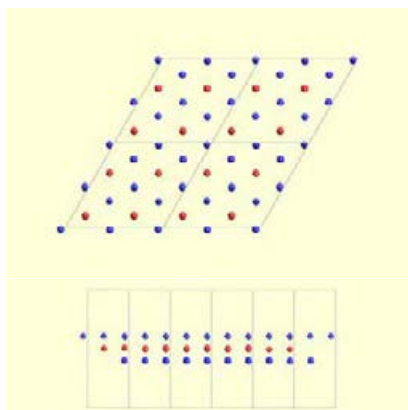

PtCs<sub>2</sub> (H)

×

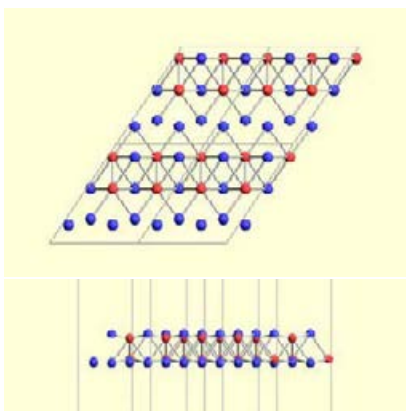

PtHf<sub>2</sub> (T)

×

×

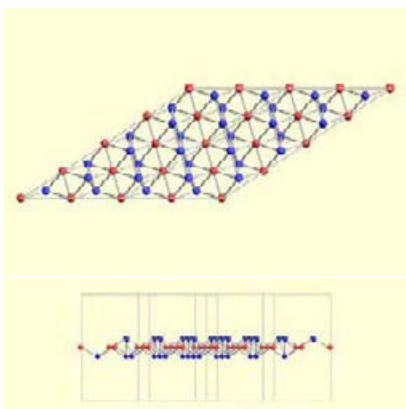

PtIr<sub>2</sub> (T)

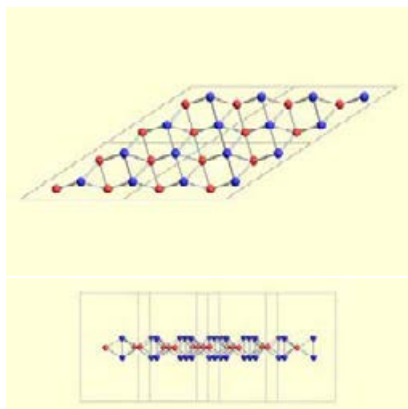

PtIr<sub>2</sub> (H)

×

×

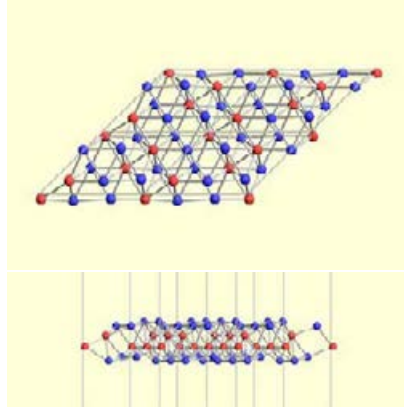

PtAu<sub>2</sub> (H)

×

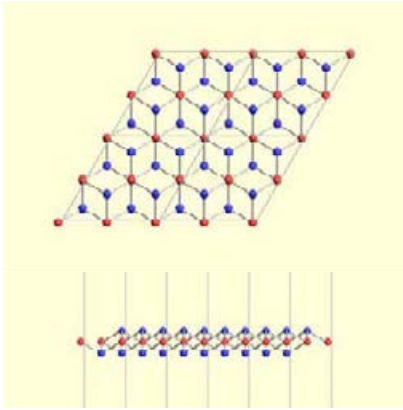

PtHg<sub>2</sub> (T)

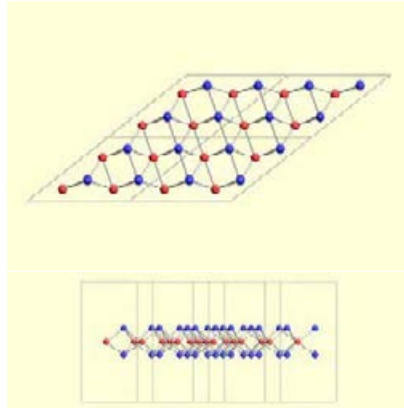

PtHg<sub>2</sub> (H)

×

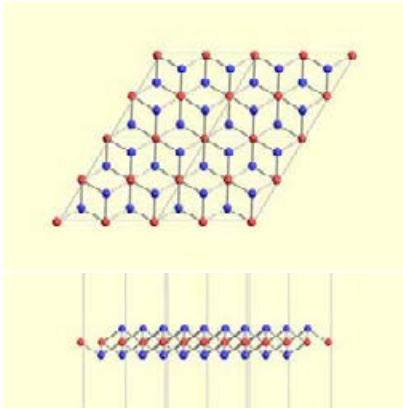

PtTl<sub>2</sub> (T)

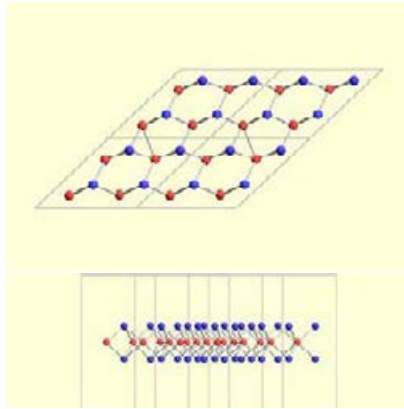

PtTl<sub>2</sub> (H)

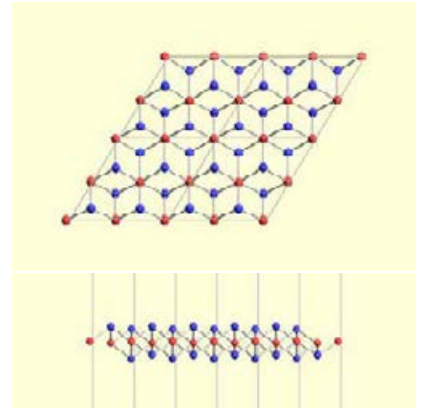

PtTl<sub>2</sub> (P)

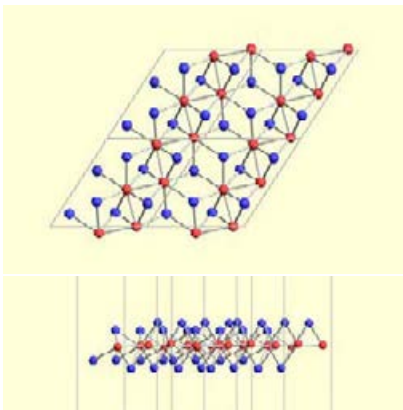

PtPb<sub>2</sub> (T)

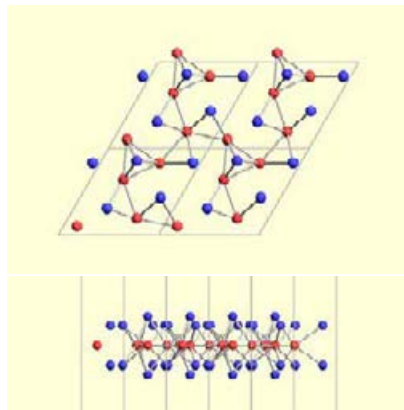

PtPb<sub>2</sub> (H)

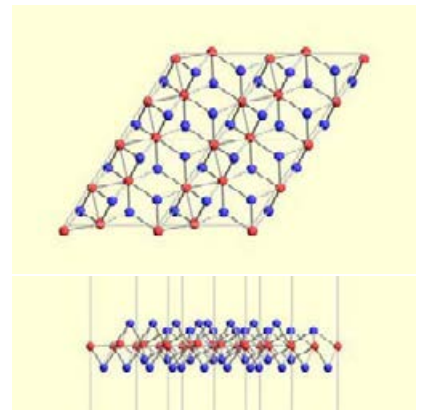

PtPb<sub>2</sub> (P)

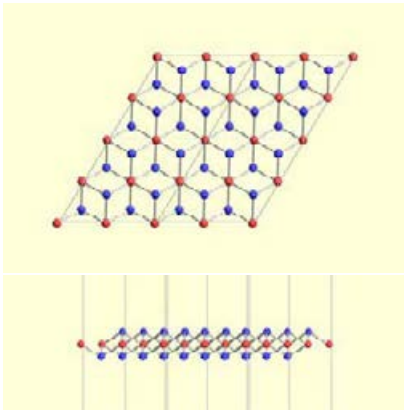

PtBi<sub>2</sub> (T)

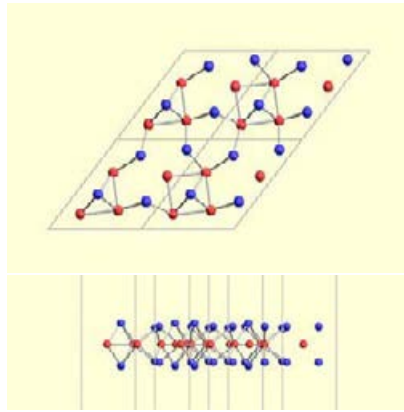

PtBi<sub>2</sub> (H)

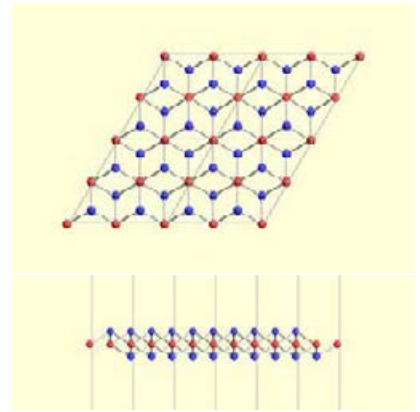

PtBi<sub>2</sub> (P)

×

×

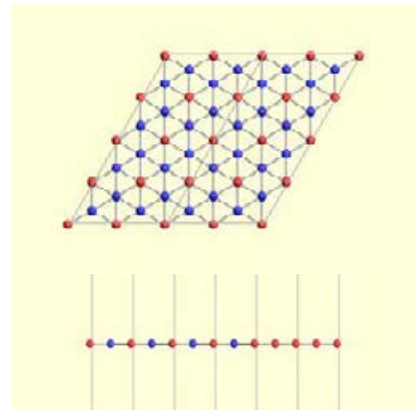

AuBe<sub>2</sub> (P)

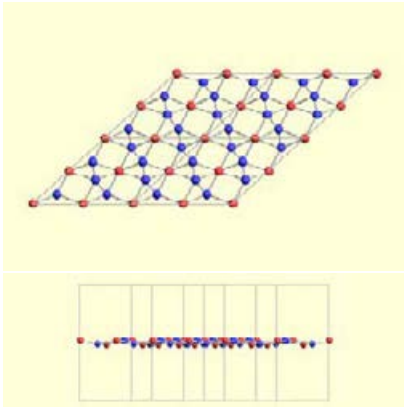

AuB<sub>2</sub> (T)

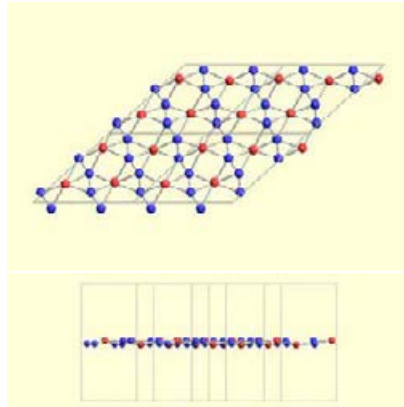

AuB<sub>2</sub> (H)

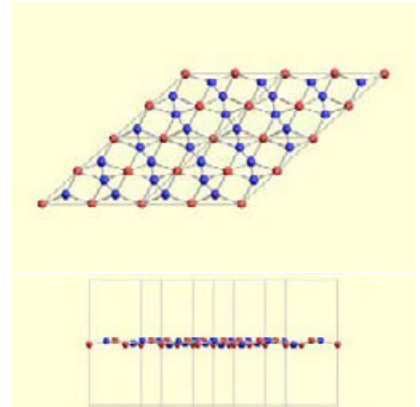

AuB<sub>2</sub> (P)

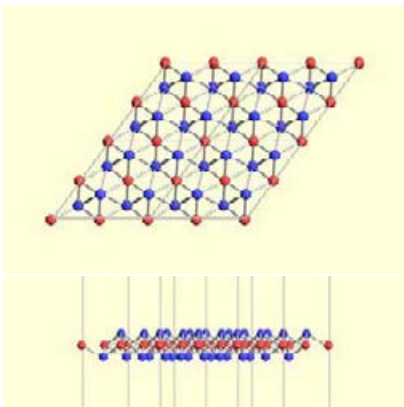

AuO<sub>2</sub> (T)

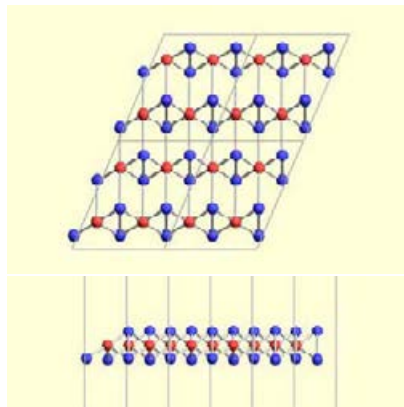

AuO<sub>2</sub> (H)

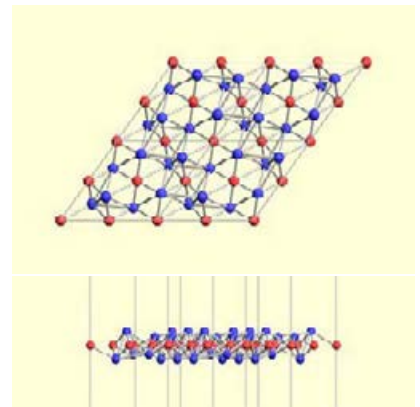

AuO<sub>2</sub> (P)



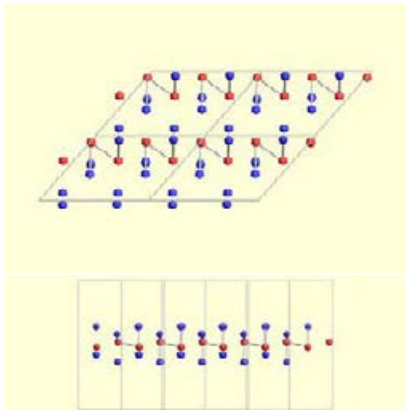

AuNa<sub>2</sub> (T)

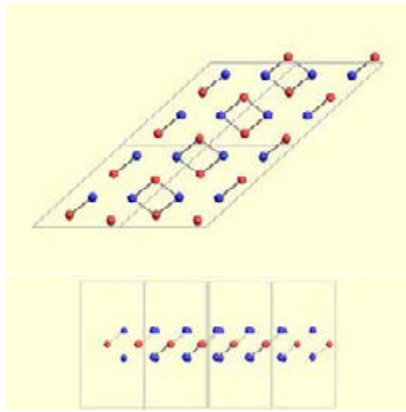

AuNa<sub>2</sub> (H)

×

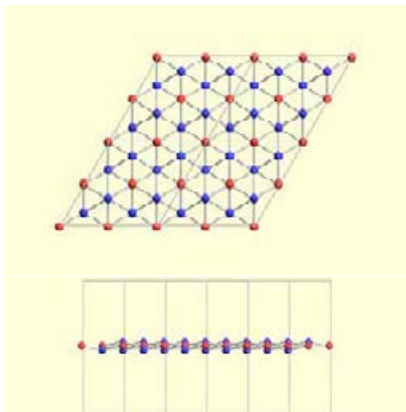

AuAl<sub>2</sub> (T)

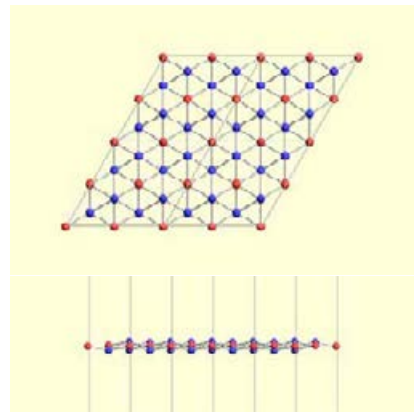

AuAl<sub>2</sub> (P)

×

×

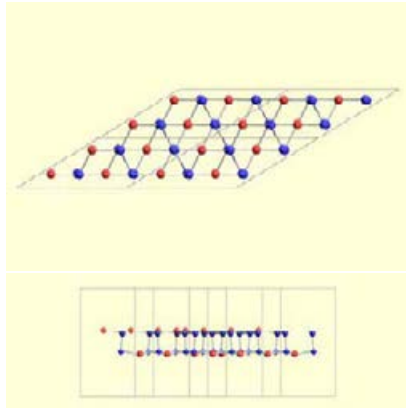

AuSi<sub>2</sub> (H)

×

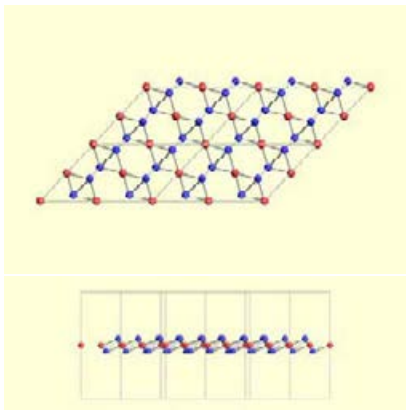

AuP<sub>2</sub> (T)

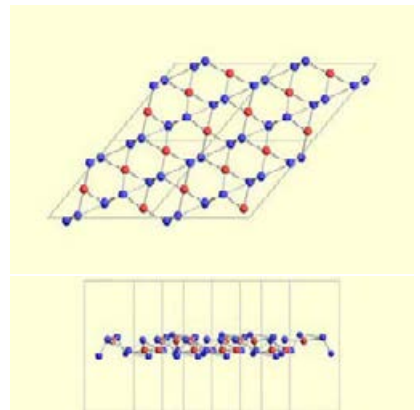

AuP<sub>2</sub> (P)

×



×

×

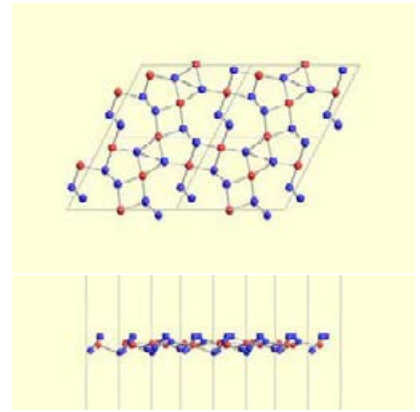

AuS<sub>2</sub> (P)

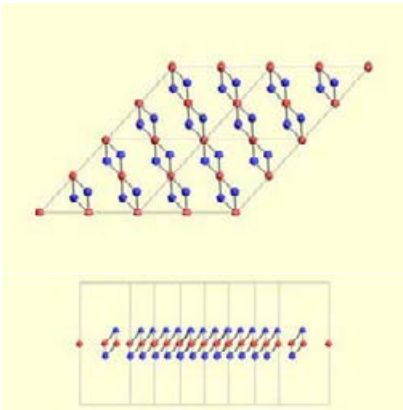

AuCl<sub>2</sub> (T)

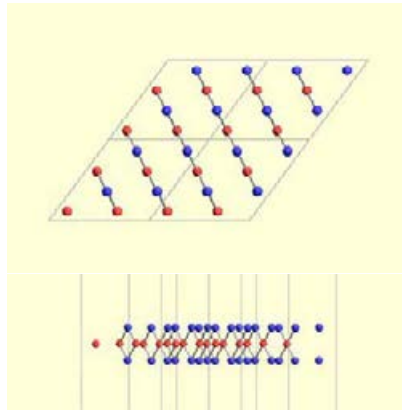

AuCl<sub>2</sub> (H)

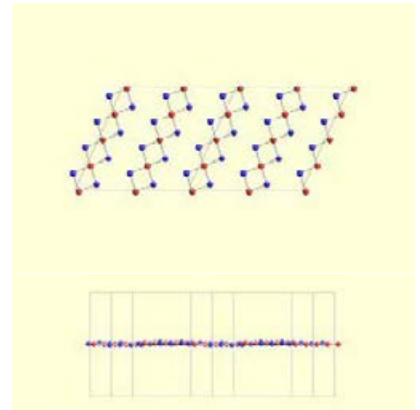

AuCl<sub>2</sub> (P)

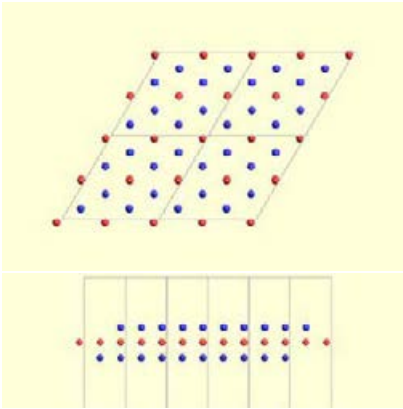

AuK<sub>2</sub> (T)

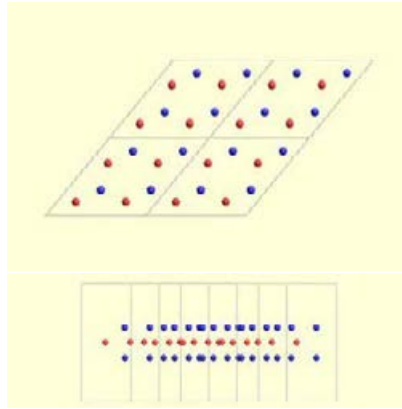

AuK<sub>2</sub> (H)

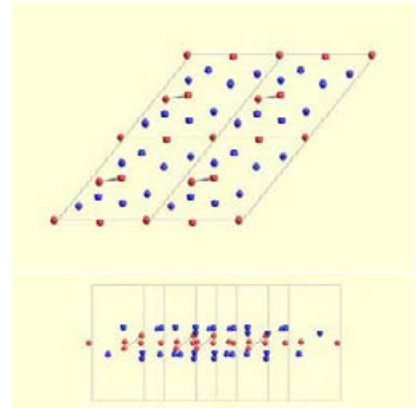

AuK<sub>2</sub> (P)

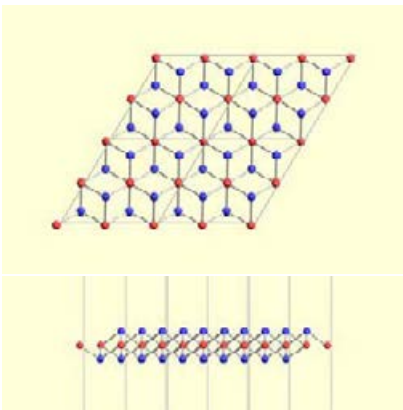

AuCa<sub>2</sub> (T)

×

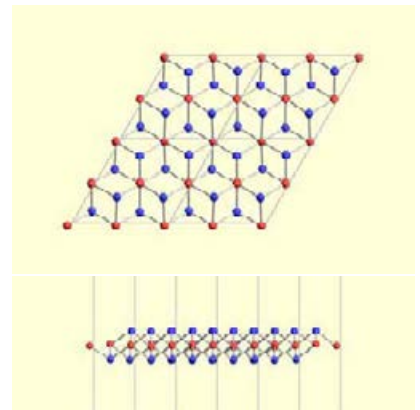

AuCa<sub>2</sub> (P)

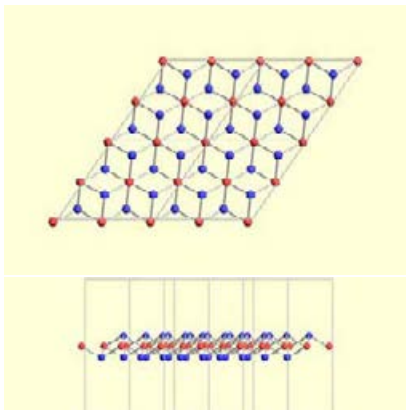

AuSc<sub>2</sub> (T)

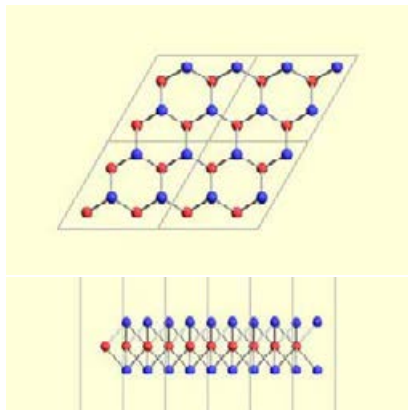

AuSc<sub>2</sub> (H)

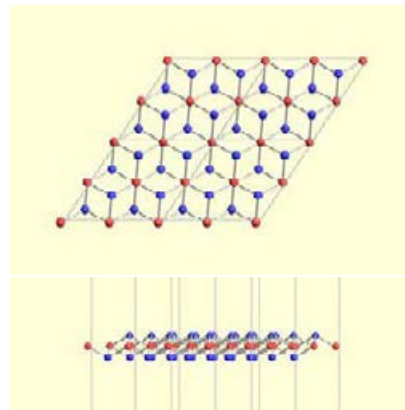

AuSc<sub>2</sub> (P)

×

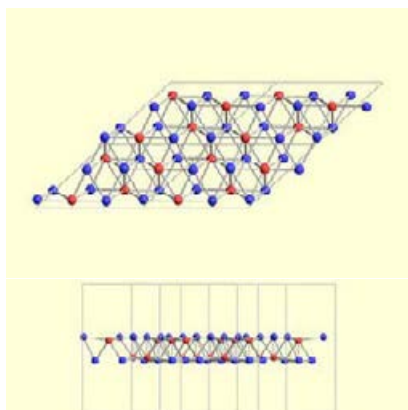

AuCr<sub>2</sub> (H)

×

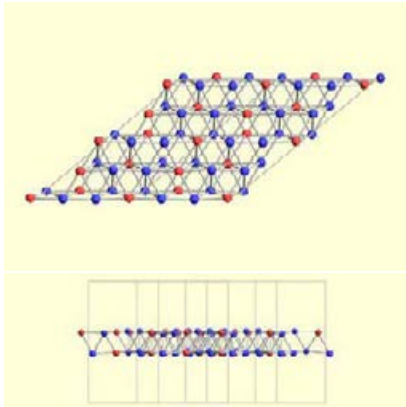

AuMn<sub>2</sub> (T)

×

×

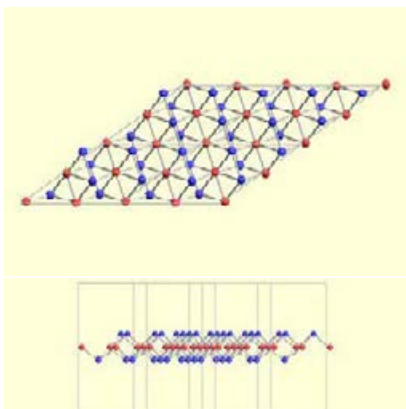

AuGa<sub>2</sub> (T)

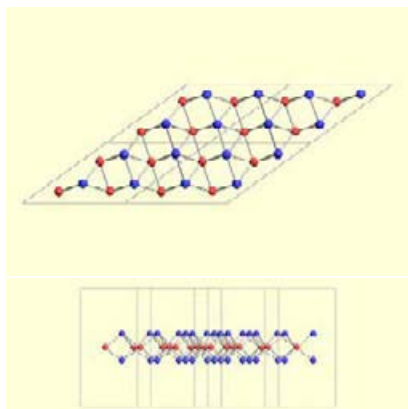

AuGa<sub>2</sub> (H)

×

×

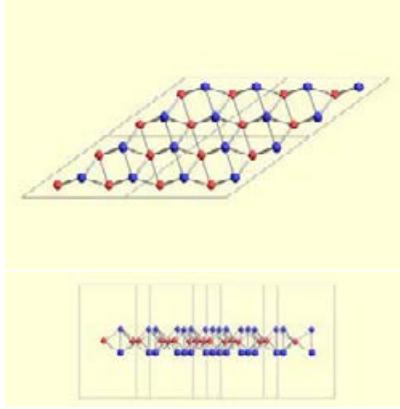

AuGe<sub>2</sub> (H)

×

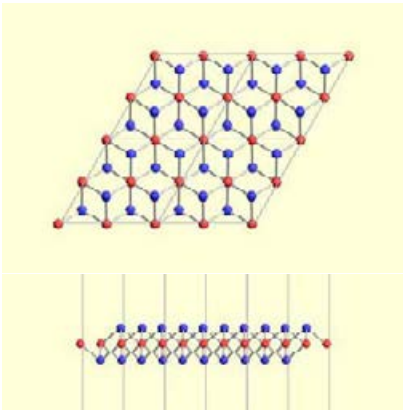

AuSe<sub>2</sub> (T)

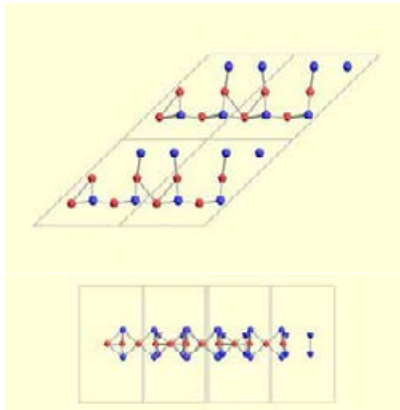

AuSe<sub>2</sub> (H)

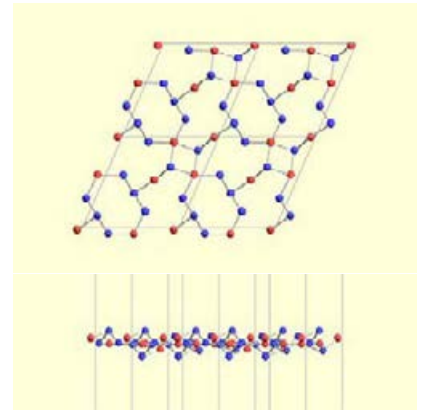

AuSe<sub>2</sub> (P)

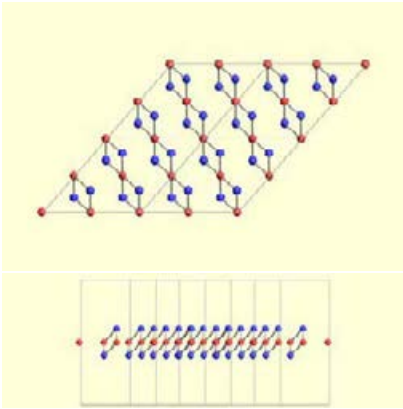

AuBr<sub>2</sub> (T)

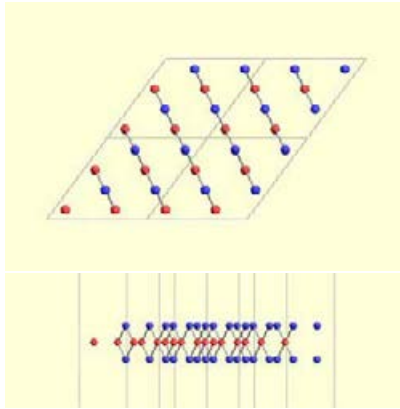

AuBr<sub>2</sub> (H)

×

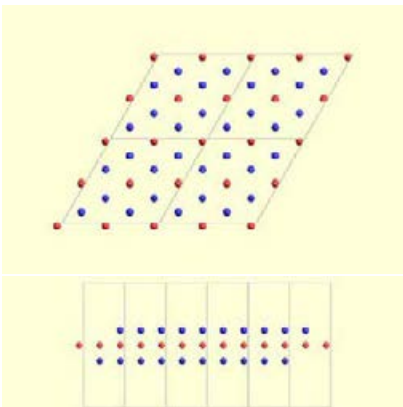

AuRb<sub>2</sub> (T)

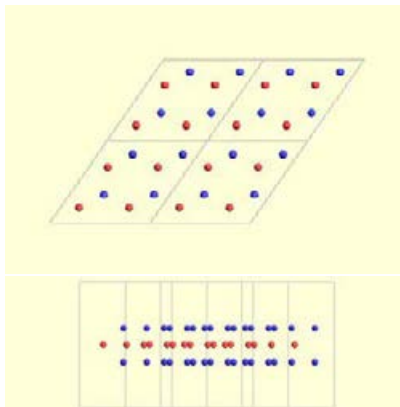

AuRb<sub>2</sub> (H)

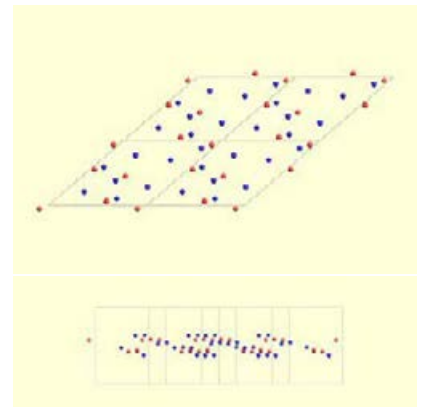

AuRb<sub>2</sub> (P)

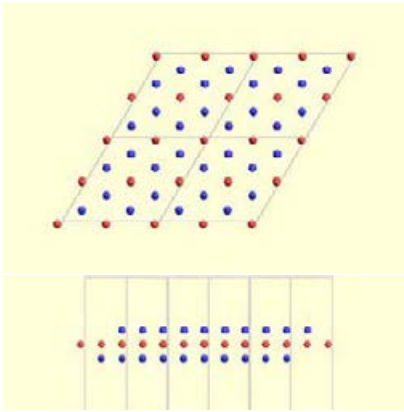

AuSr<sub>2</sub> (T)

×

×

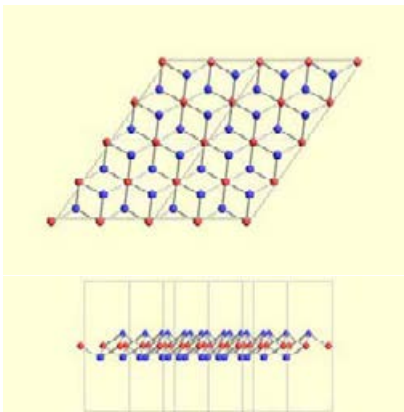

AuY<sub>2</sub> (T)

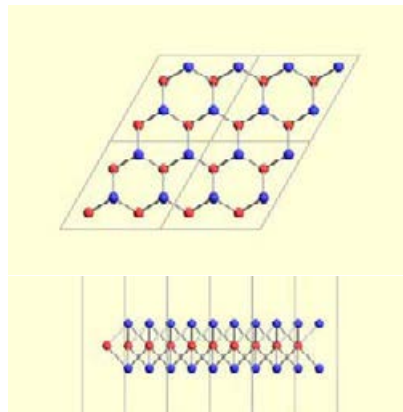

AuY<sub>2</sub> (H)

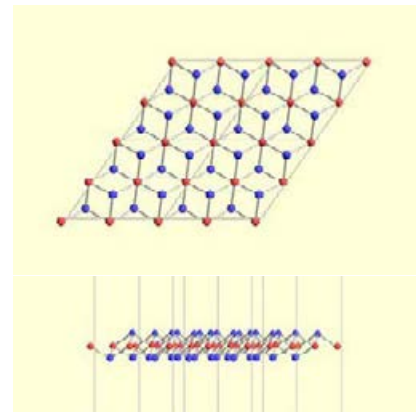

AuY<sub>2</sub> (P)

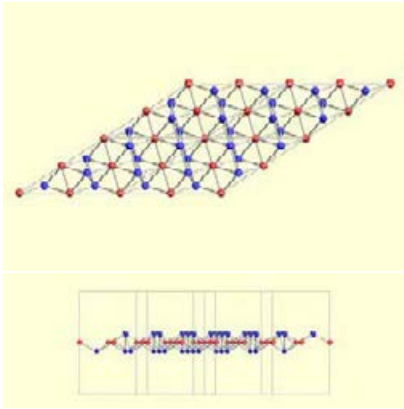

AuPd<sub>2</sub> (T)

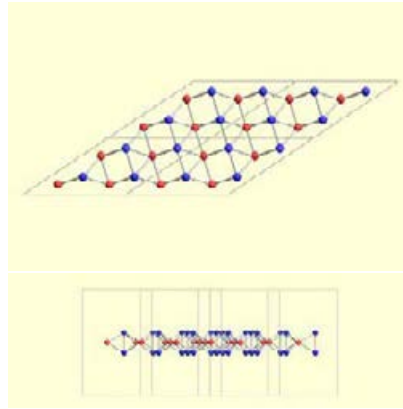

AuPd<sub>2</sub> (H)

×

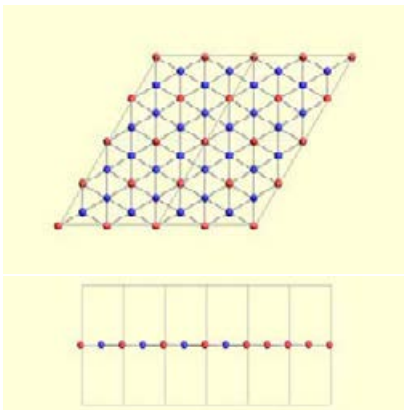

AuAg<sub>2</sub> (T)

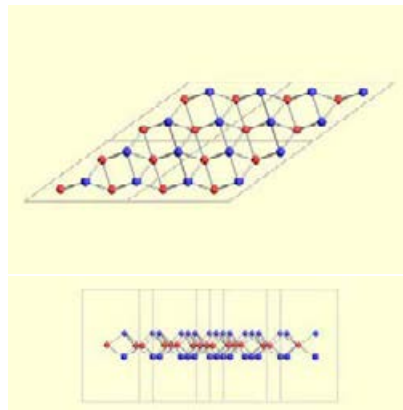

AuAg<sub>2</sub> (H)

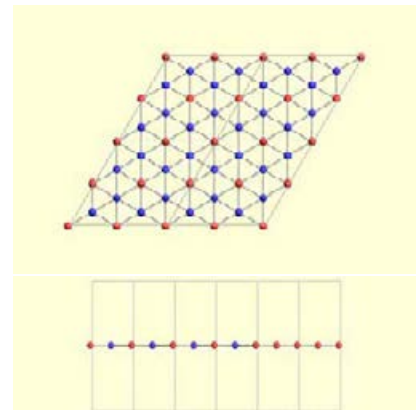

AuAg<sub>2</sub> (P)



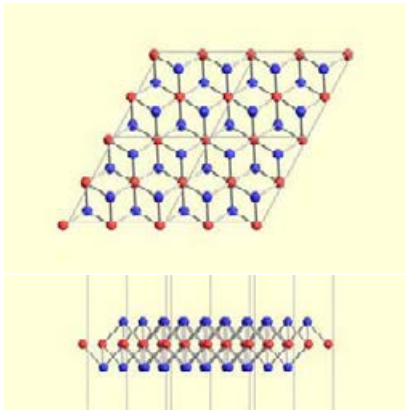

AuIn<sub>2</sub> (T)

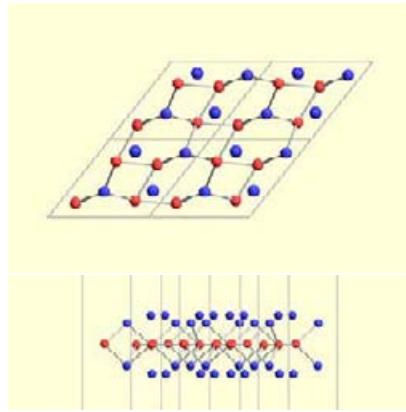

AuIn<sub>2</sub> (H)

×

×

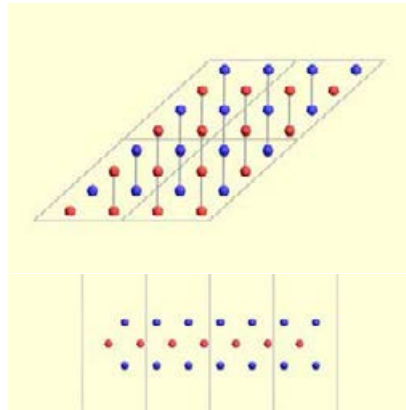

AuSn<sub>2</sub> (H)

×

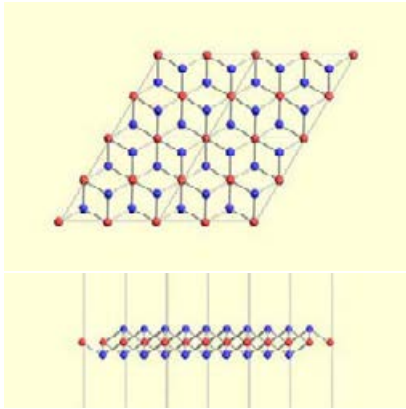

AuSb<sub>2</sub> (T)

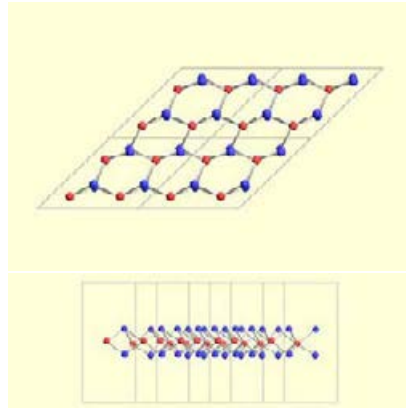

AuSb<sub>2</sub> (H)

×

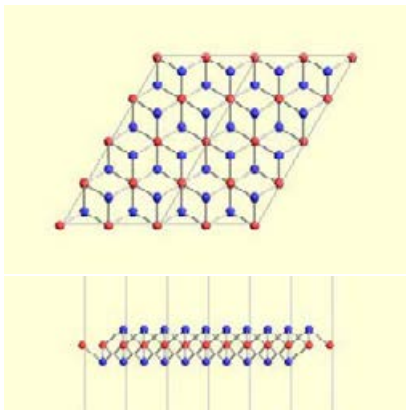

AuTe<sub>2</sub> (T)

×

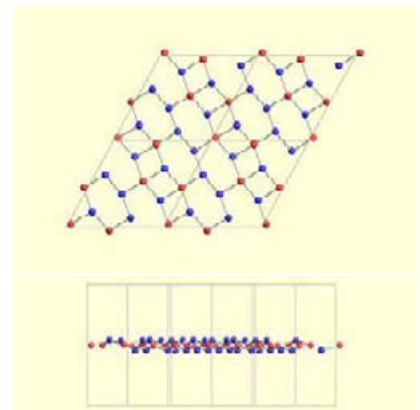

AuTe<sub>2</sub> (P)



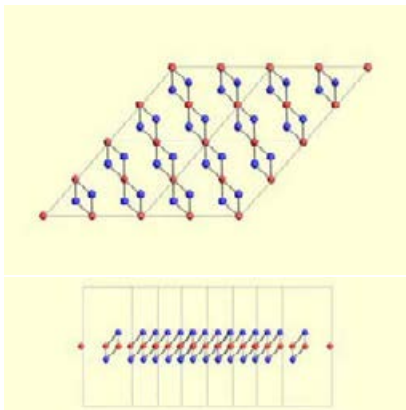

AuI<sub>2</sub> (T)

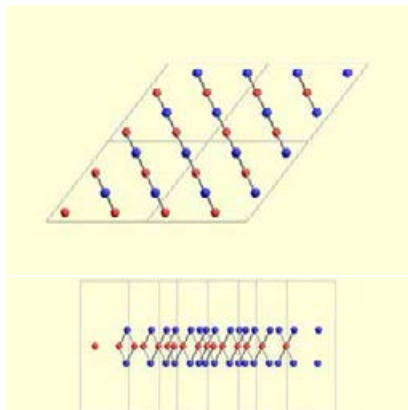

AuI<sub>2</sub> (H)

×

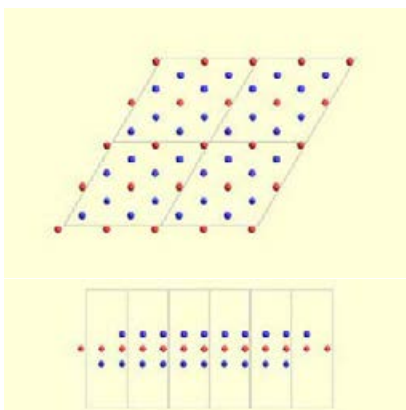

AuCs<sub>2</sub> (T)

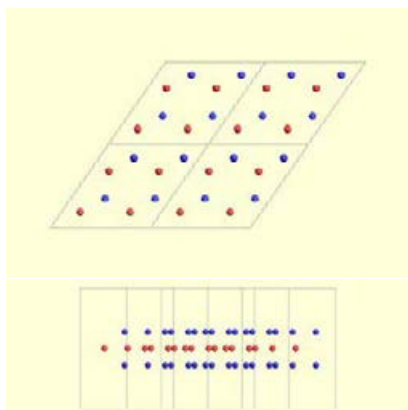

AuCs<sub>2</sub> (H)

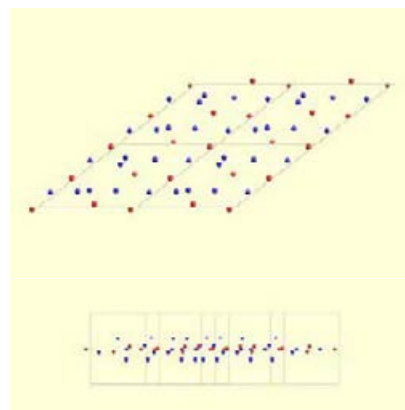

AuCs<sub>2</sub> (P)

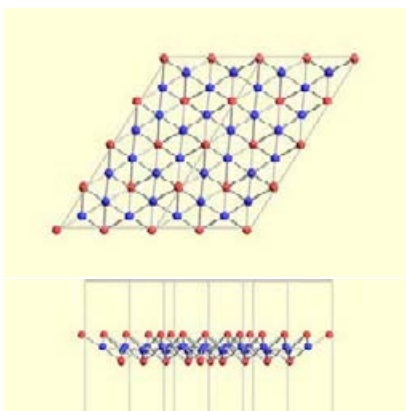

AuIr<sub>2</sub> (T)

×

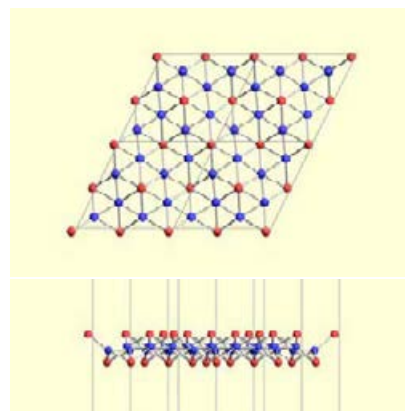

AuIr<sub>2</sub> (P)

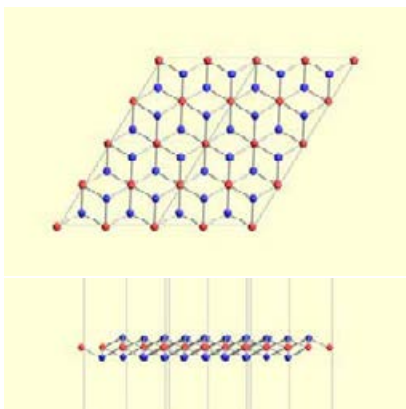

AuHg<sub>2</sub> (T)

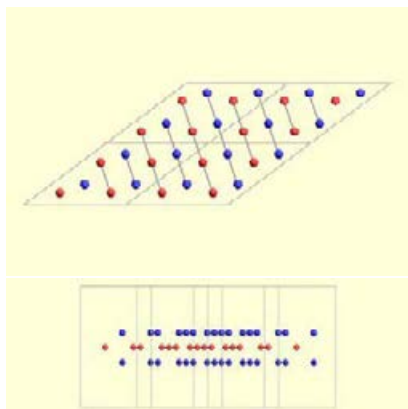

AuHg<sub>2</sub> (H)

×

×

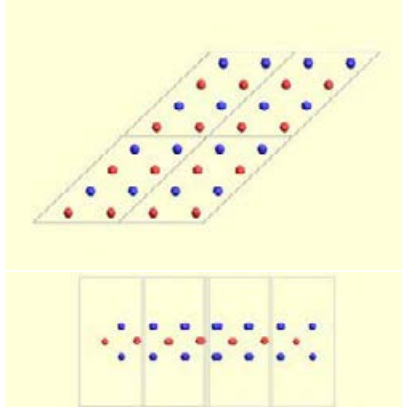

AuPb<sub>2</sub> (H)

×

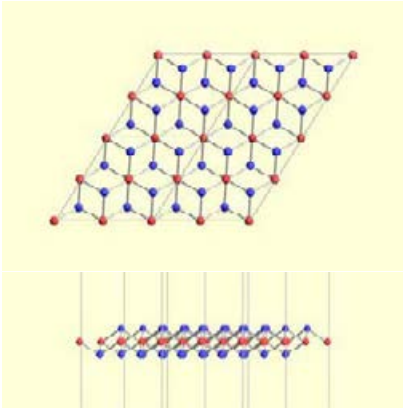

AuBi<sub>2</sub> (T)

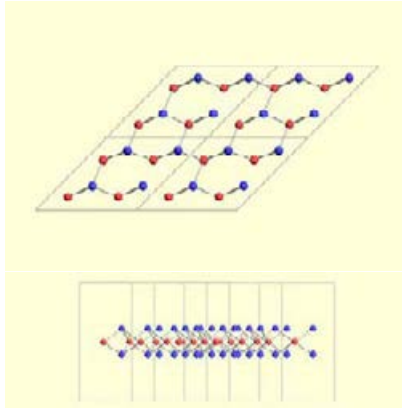

AuBi<sub>2</sub> (H)

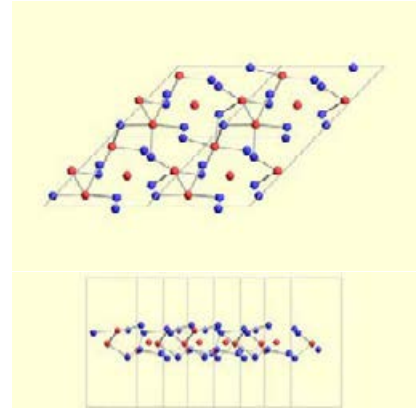

AuBi<sub>2</sub> (P)

×

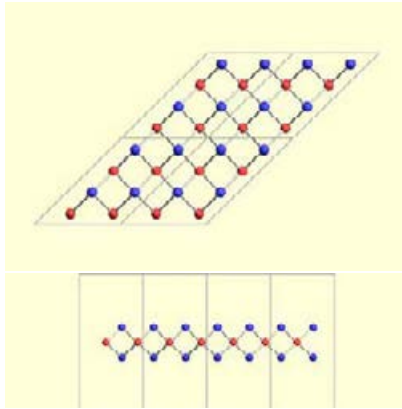

HgLi<sub>2</sub> (H)

×

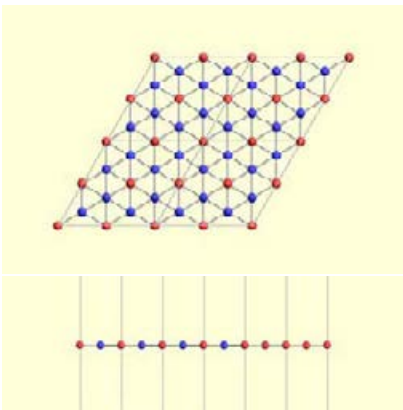

HgBe<sub>2</sub> (T)

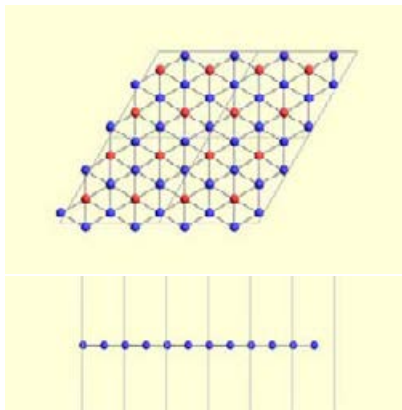

HgBe<sub>2</sub> (H)

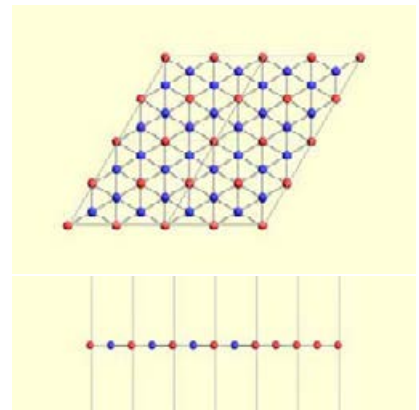

HgBe<sub>2</sub> (P)

×

×

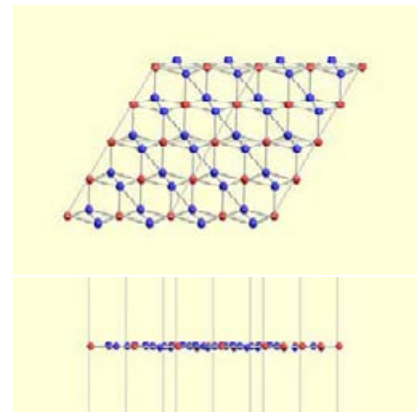

HgO<sub>2</sub> (P)

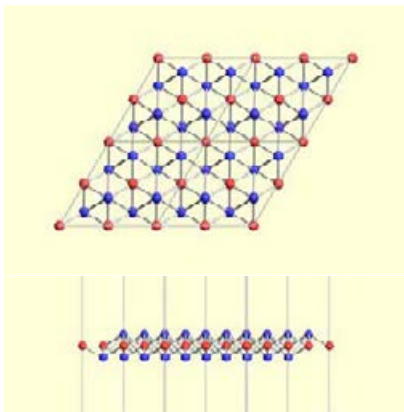

HgF<sub>2</sub> (T)

×

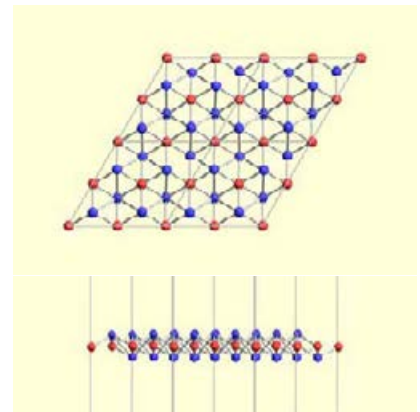

HgF<sub>2</sub> (P)

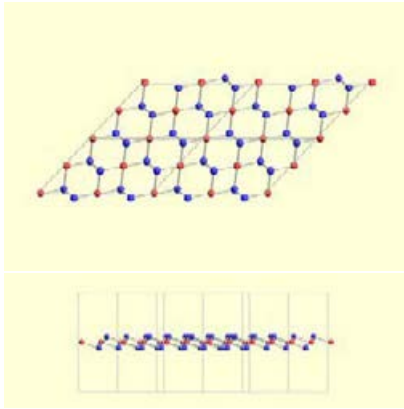

HgP<sub>2</sub> (T)

×

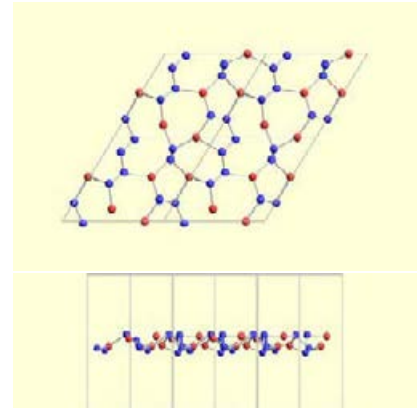

HgP<sub>2</sub> (P)

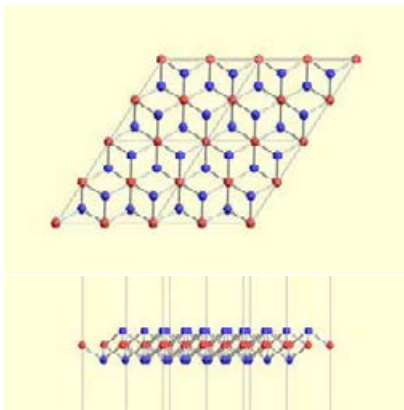

HgCl<sub>2</sub> (T)

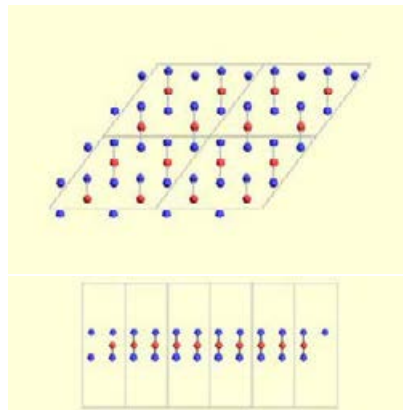

HgCl<sub>2</sub> (H)

×

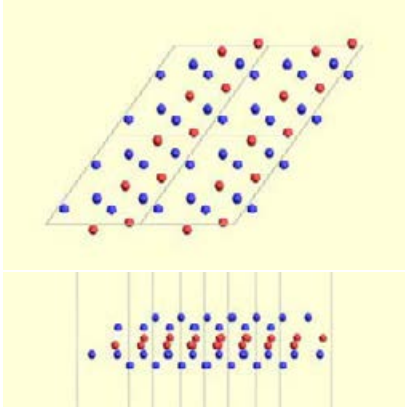

HgCa<sub>2</sub> (T)

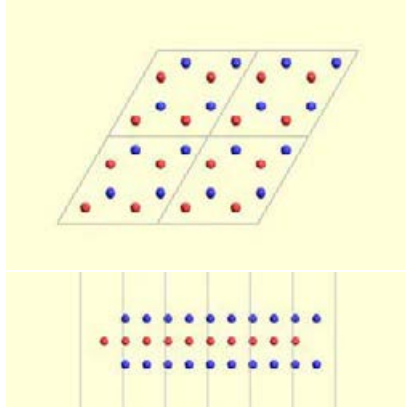

HgCa<sub>2</sub> (H)

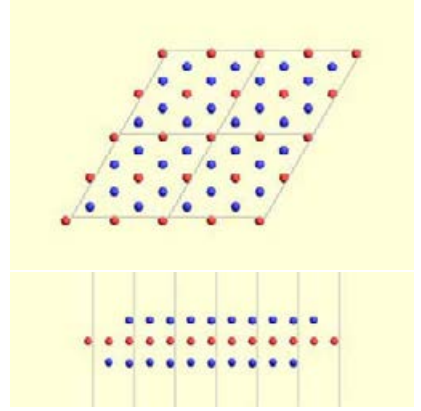

HgCa<sub>2</sub> (P)

×

×

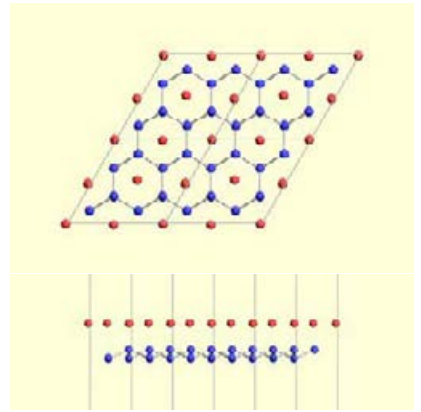

HgGe<sub>2</sub> (P)

×

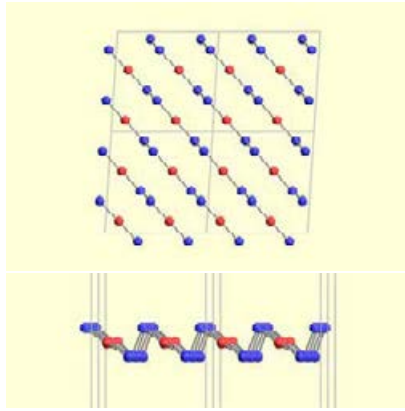

HgSe<sub>2</sub> (H)

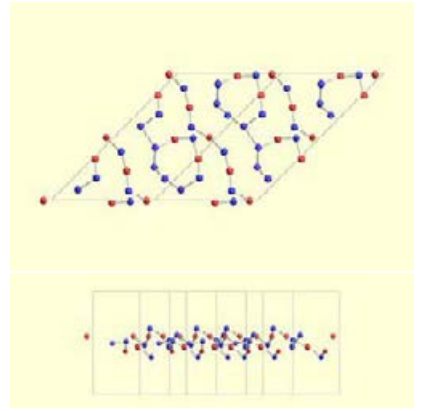

HgSe<sub>2</sub> (P)

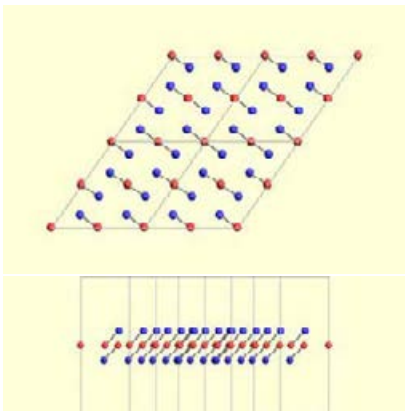

HgBr<sub>2</sub> (T)

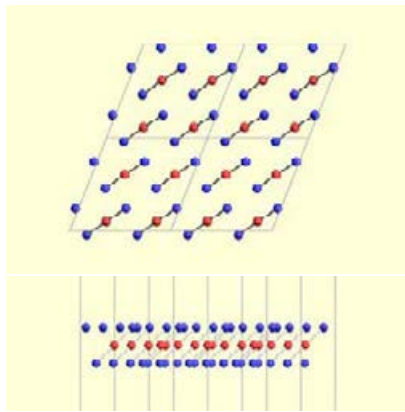

HgBr<sub>2</sub> (H)

×



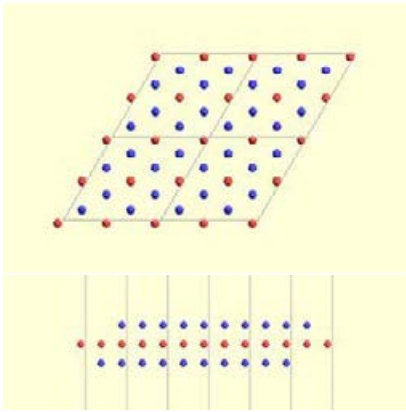

HgSr<sub>2</sub> (T)

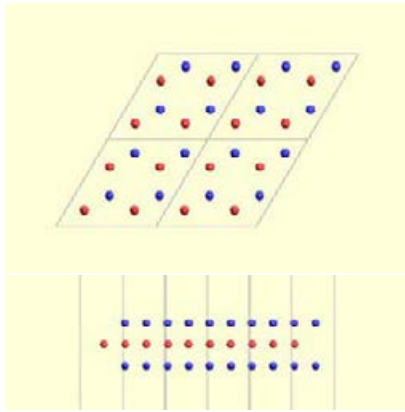

HgSr<sub>2</sub> (H)

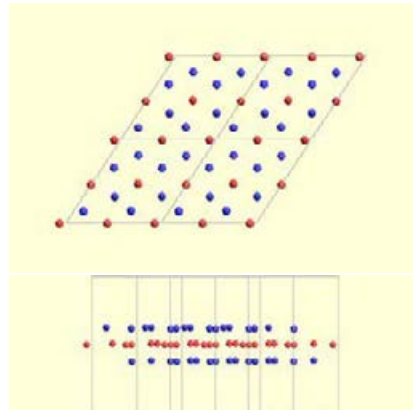

HgSr<sub>2</sub> (P)

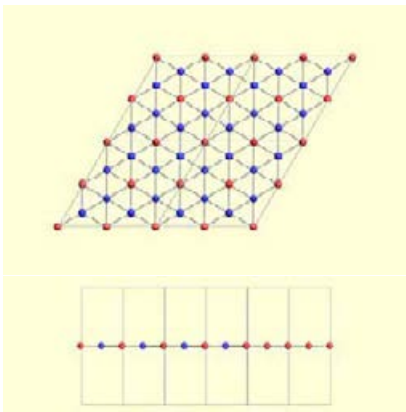

HgAg<sub>2</sub> (T)

×

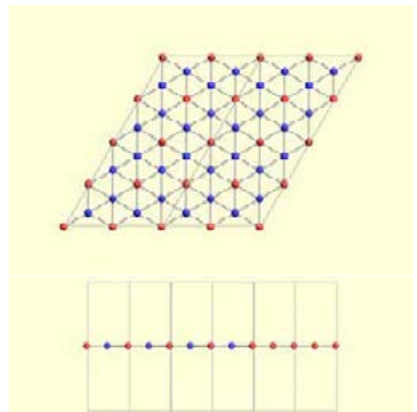

HgAg<sub>2</sub> (P)

×

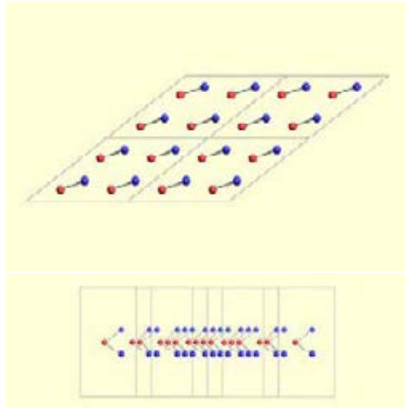

HgSn<sub>2</sub> (H)

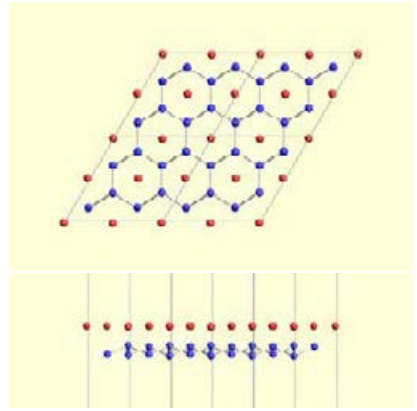

HgSn<sub>2</sub> (P)

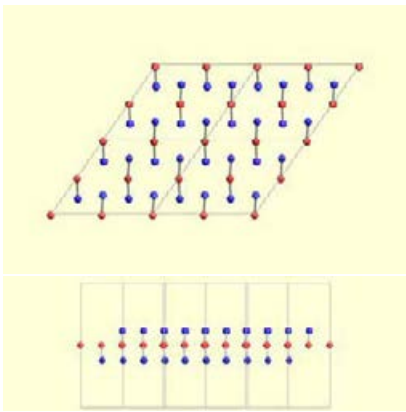

HgI<sub>2</sub> (T)

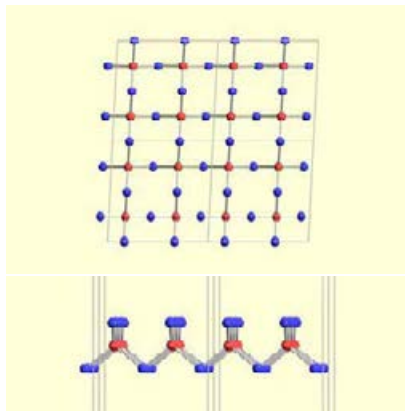

HgI<sub>2</sub> (H)

×



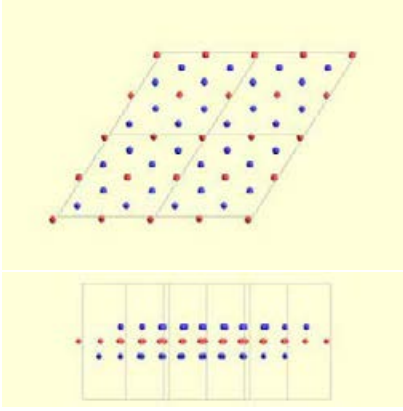

HgCs<sub>2</sub> (T)

×

×

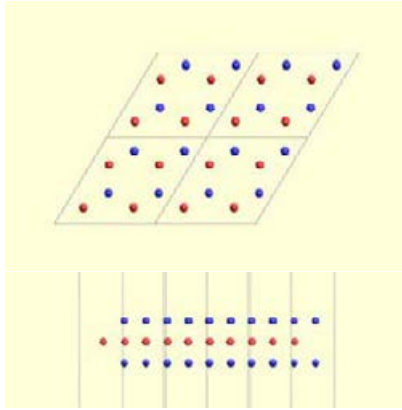

HgBa<sub>2</sub> (H)

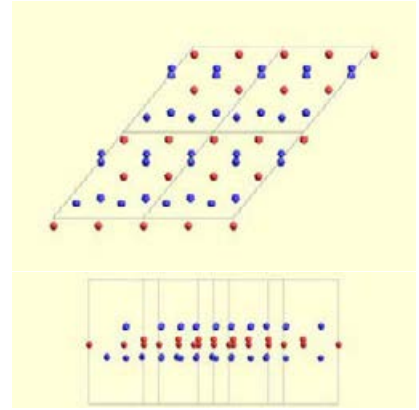

HgBa<sub>2</sub> (P)

×

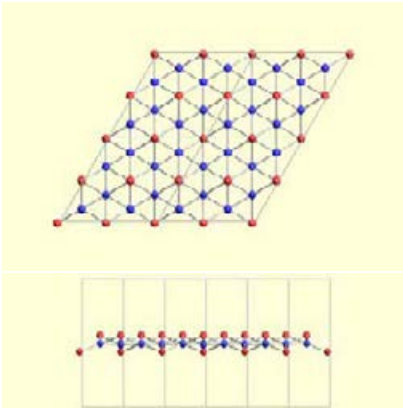

HgPt<sub>2</sub> (T)

×

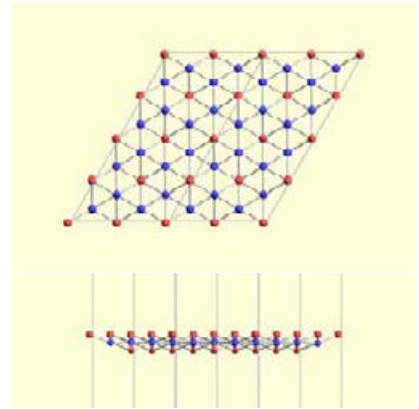

HgPt<sub>2</sub> (P)

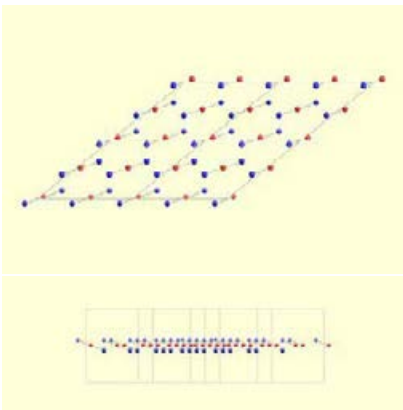

HgBi<sub>2</sub> (T)

×

×

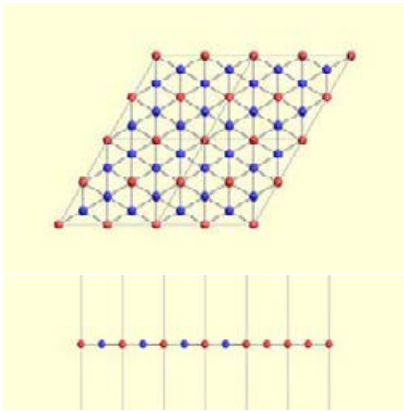

TlBe<sub>2</sub> (T)

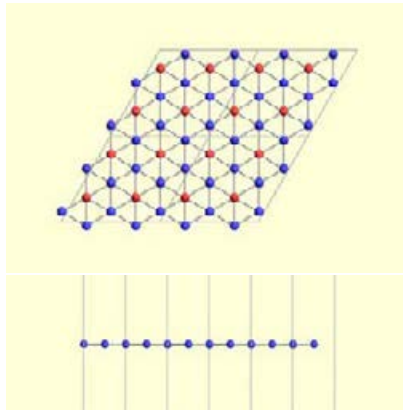

TlBe<sub>2</sub> (H)

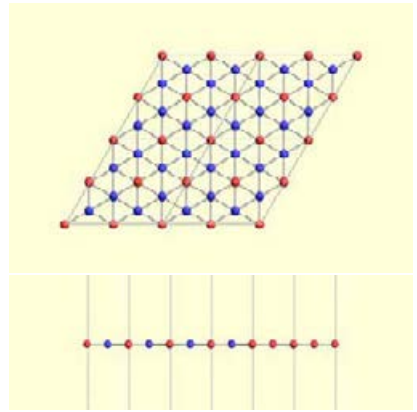

TlBe<sub>2</sub> (P)

×

×

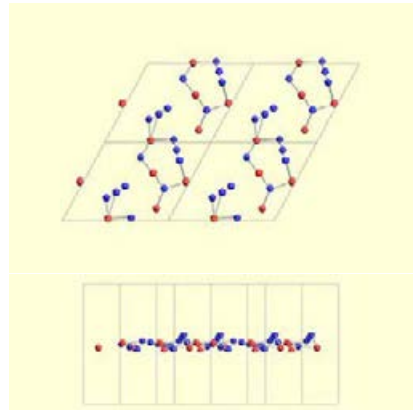

TlN<sub>2</sub> (P)

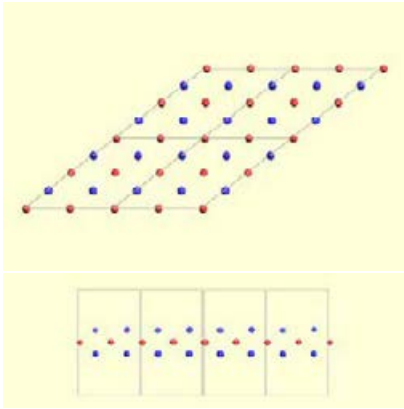

TlNa<sub>2</sub> (T)

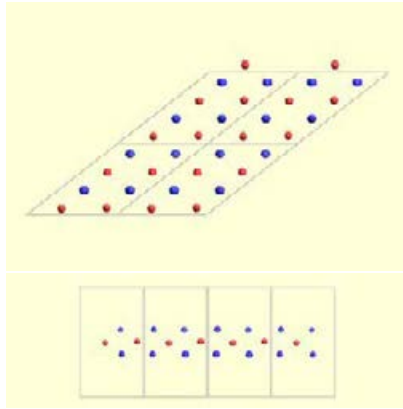

TlNa<sub>2</sub> (H)

×

×

×

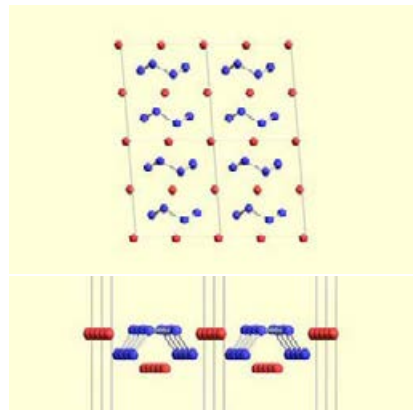

TlS<sub>2</sub> (P)

×

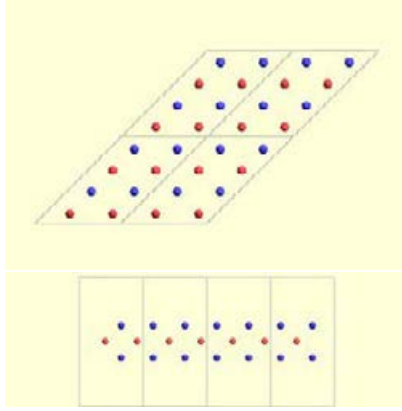

$\text{TiCa}_2$  (H)

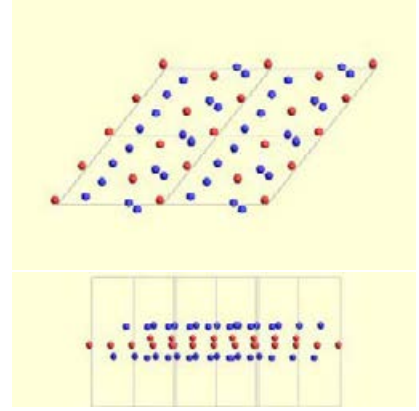

$\text{TiCa}_2$  (P)

×

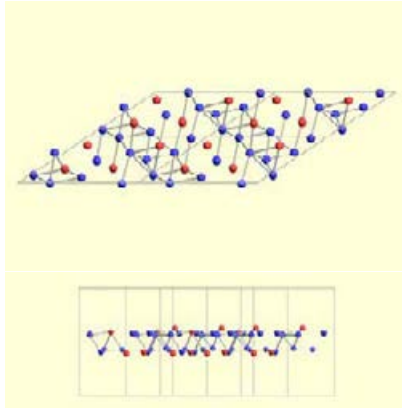

$\text{TiCr}_2$  (H)

×

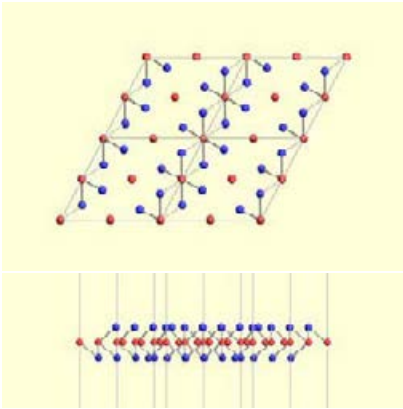

$\text{TiBr}_2$  (T)

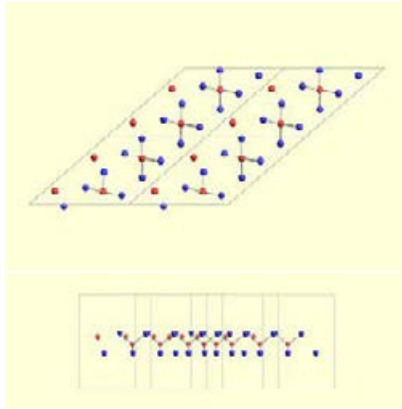

$\text{TiBr}_2$  (H)

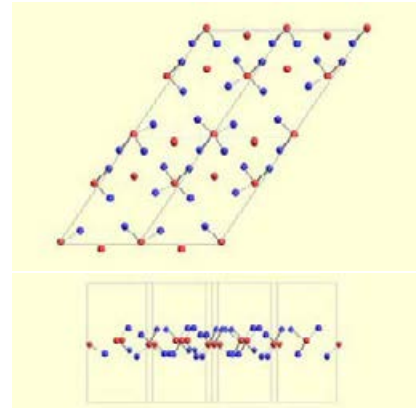

$\text{TiBr}_2$  (P)

×

×

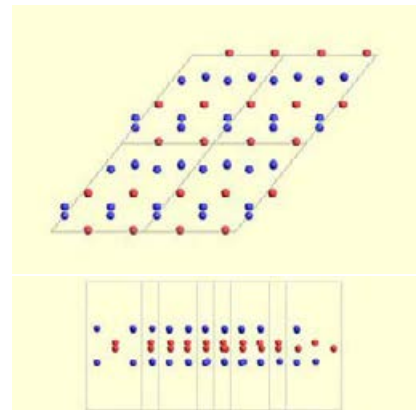

$\text{TiSr}_2$  (P)

×

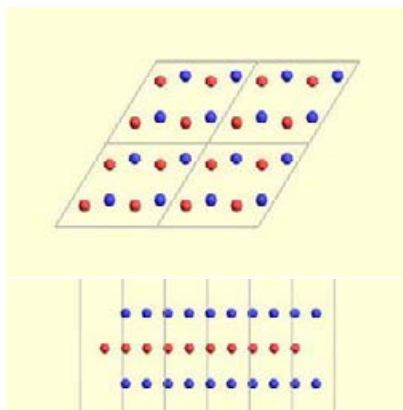

TlIn<sub>2</sub> (H)

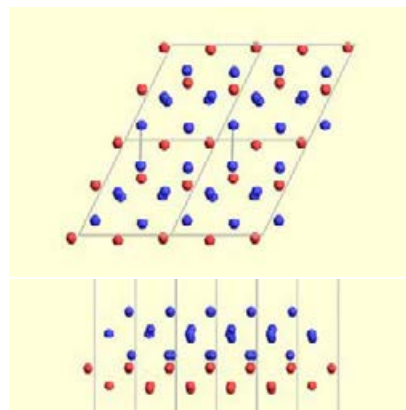

TlIn<sub>2</sub> (P)

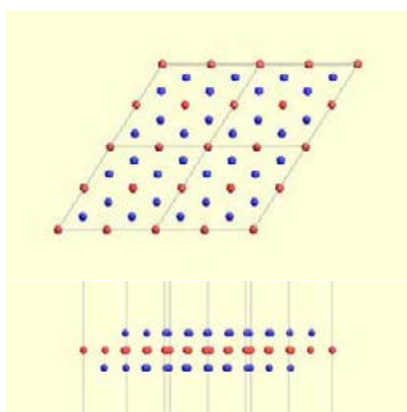

Tl<sub>2</sub> (T)

×

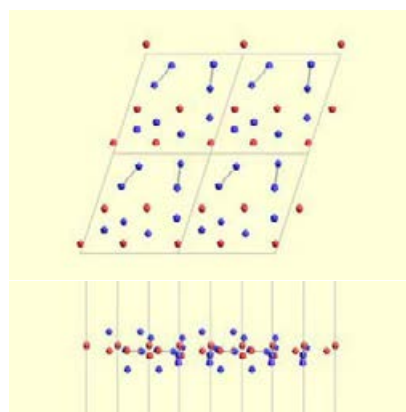

Tl<sub>2</sub> (P)

×

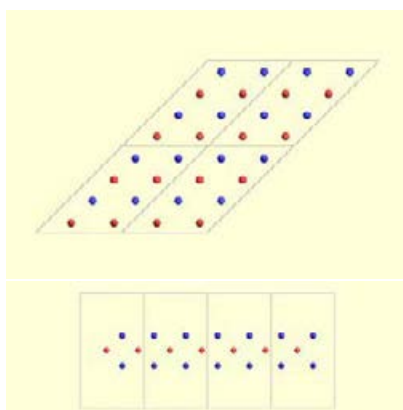

TlBa<sub>2</sub> (H)

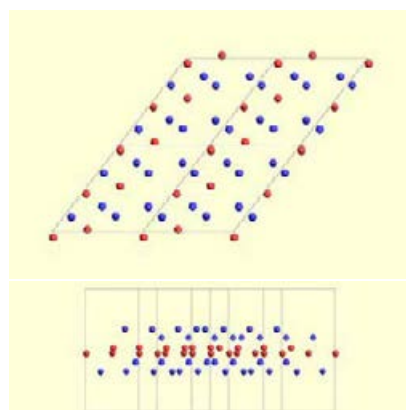

TlBa<sub>2</sub> (P)

×

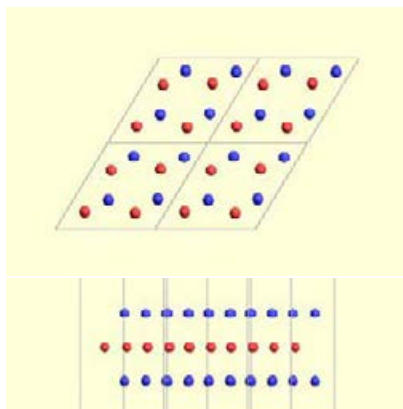

TlTl<sub>2</sub> (H)

×

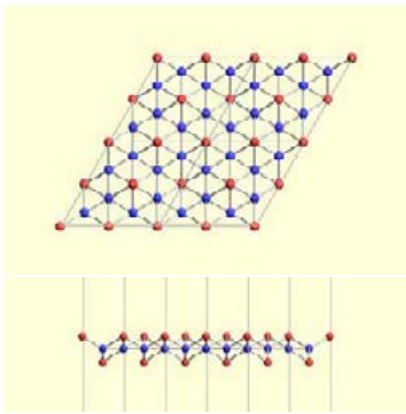

$\text{PbBe}_2$  (T)

×

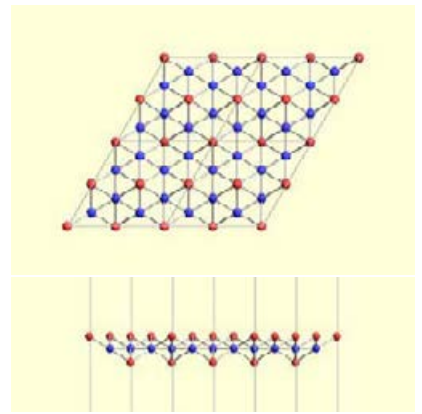

$\text{PbBe}_2$  (P)

×

×

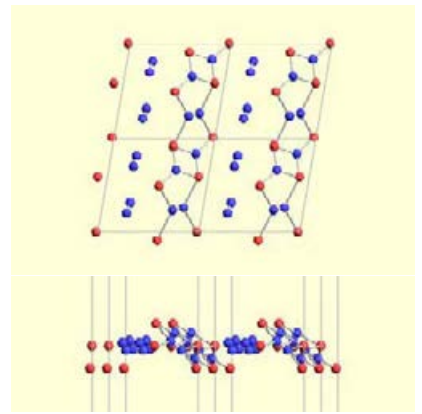

$\text{PbN}_2$  (P)

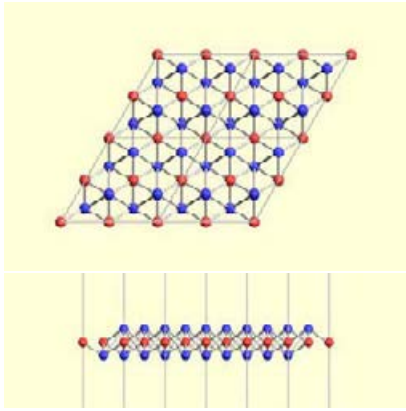

$\text{PbO}_2$  (T)

×

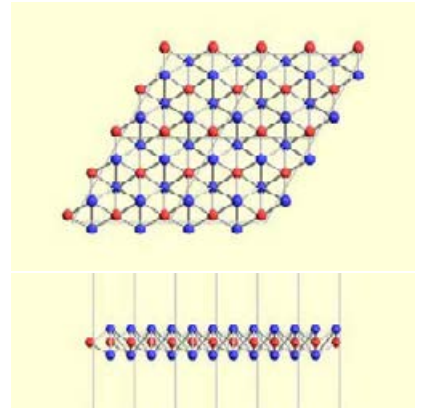

$\text{PbO}_2$  (P)

×

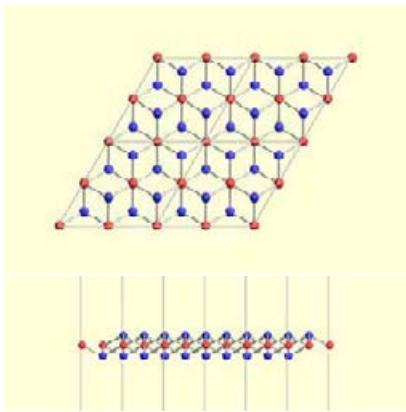

$\text{PbF}_2$  (T)

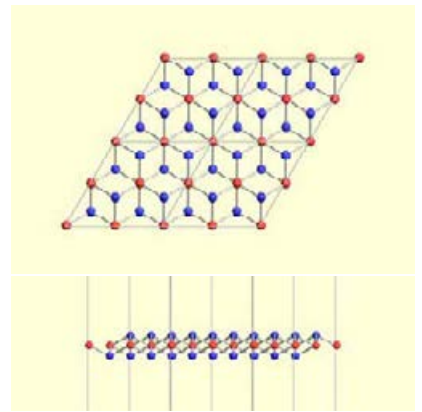

$\text{PbF}_2$  (P)



×

×

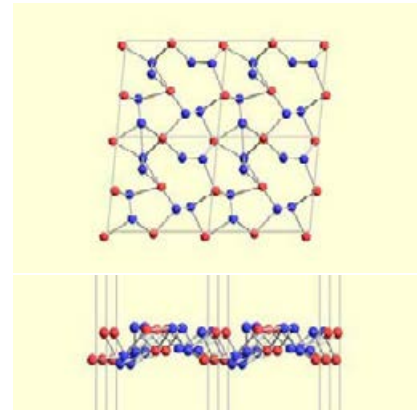

PbS<sub>2</sub> (P)

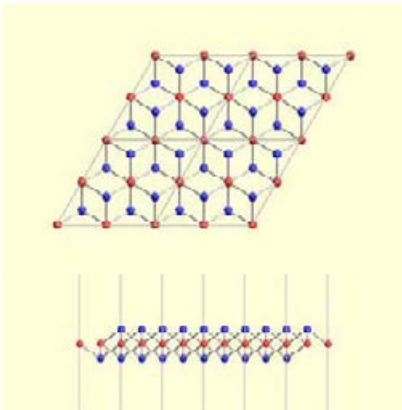

PbCl<sub>2</sub> (T)

×

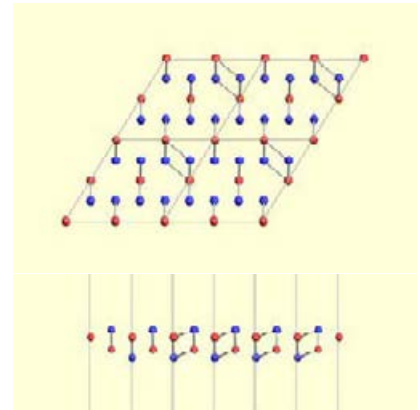

PbCl<sub>2</sub> (P)

×

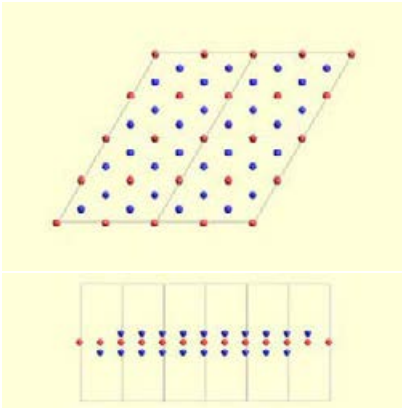

PbCa<sub>2</sub> (T)

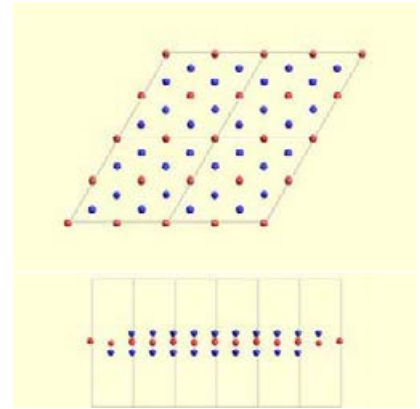

PbCa<sub>2</sub> (P)

×

×

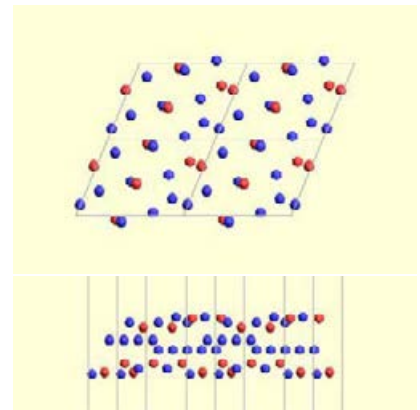

PbSc<sub>2</sub> (P)

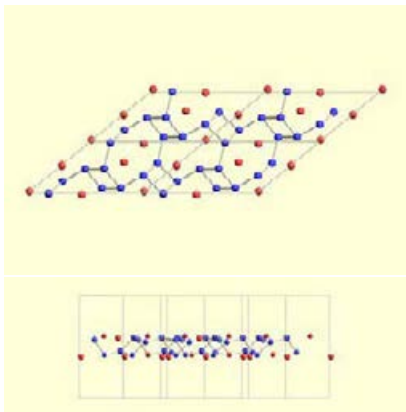

PbGe<sub>2</sub> (T)

×

×

×

×

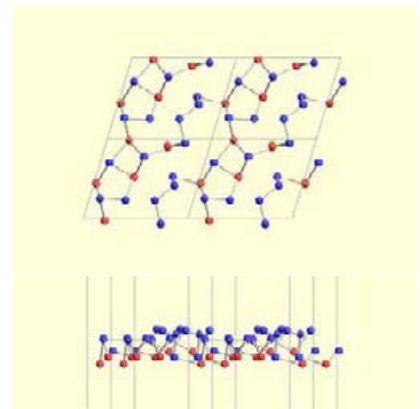

PbSe<sub>2</sub> (P)

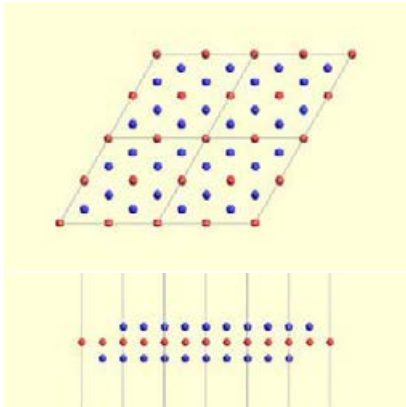

PbBr<sub>2</sub> (T)

×

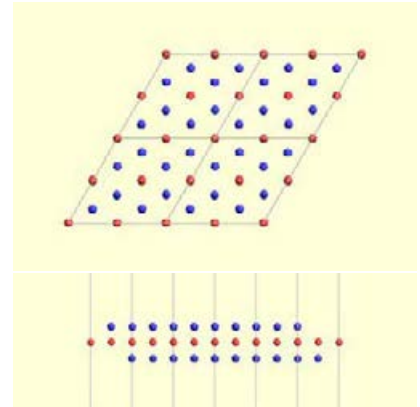

PbBr<sub>2</sub> (P)

×

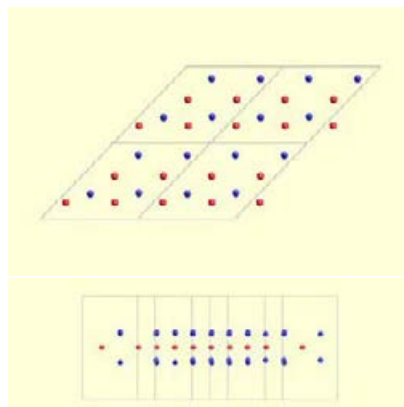

PbRb<sub>2</sub> (H)

×

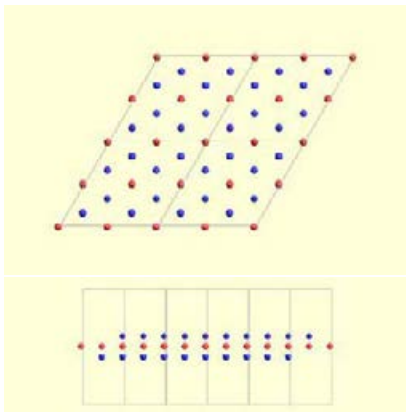

PbSr<sub>2</sub> (T)

×

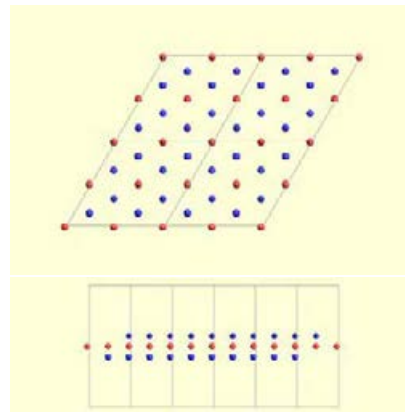

PbSr<sub>2</sub> (P)

×

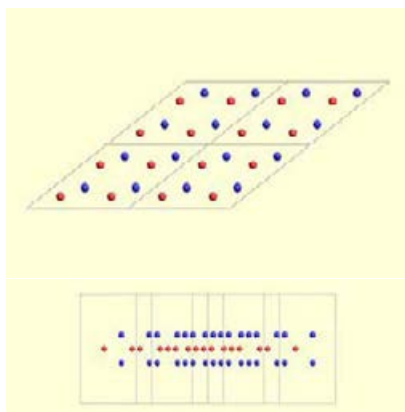

PbIn<sub>2</sub> (H)

×

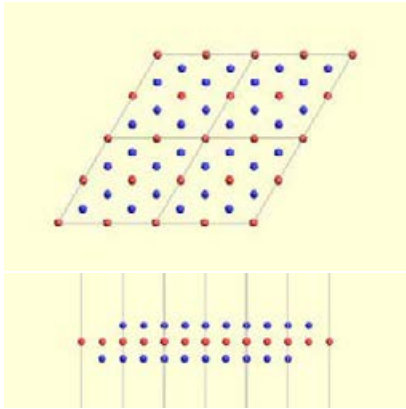

PbI<sub>2</sub> (T)

×

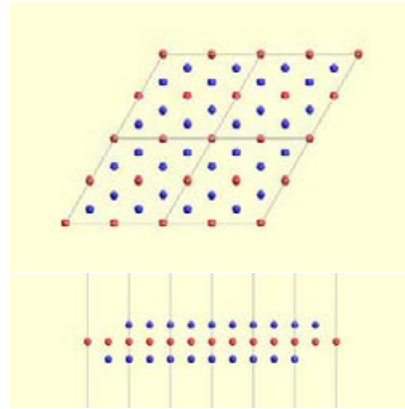

PbI<sub>2</sub> (P)

×

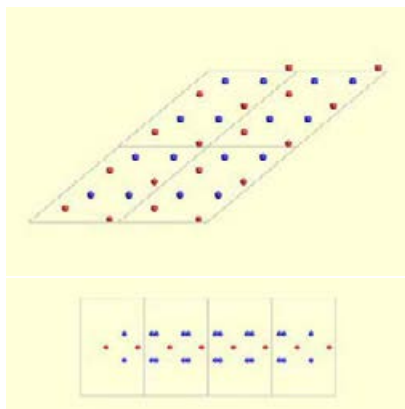

PbCs<sub>2</sub> (H)

×

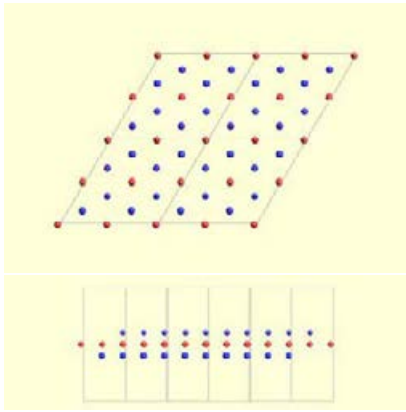

PbBa<sub>2</sub> (T)

×

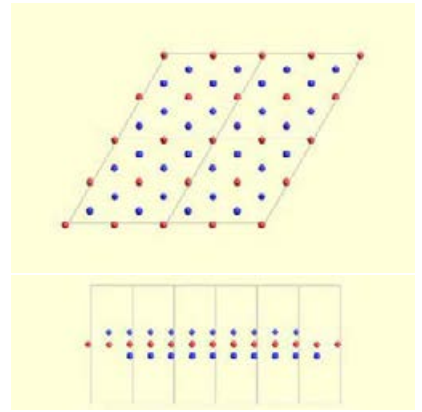

PbBa<sub>2</sub> (P)

×

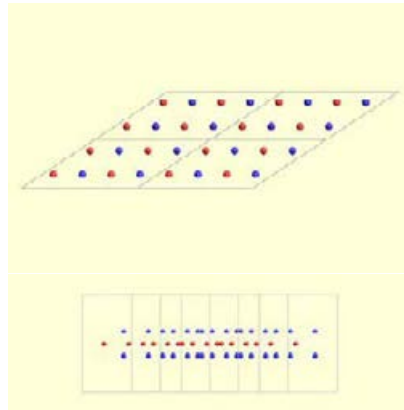

PbTl<sub>2</sub> (H)

×

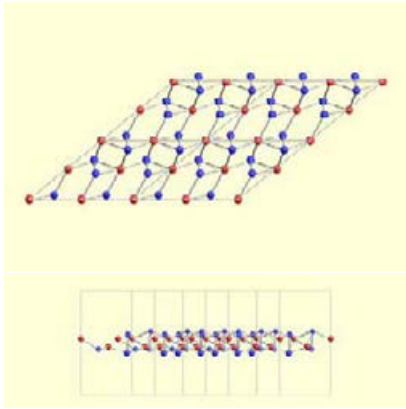

BiLi<sub>2</sub> (T)

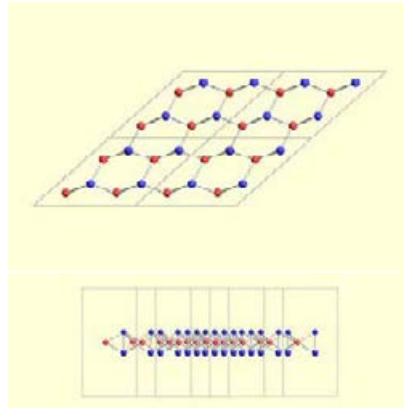

BiLi<sub>2</sub> (H)

×

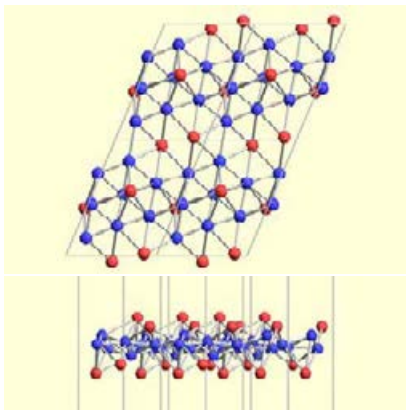

BiBe<sub>2</sub> (T)

×

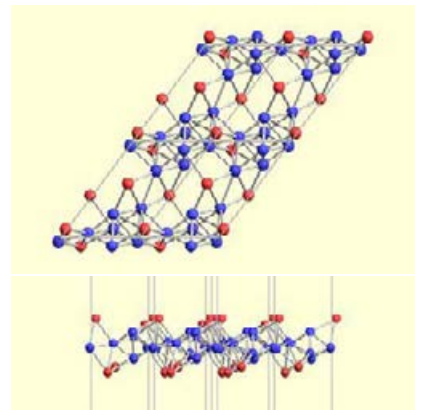

BiBe<sub>2</sub> (P)

×

×

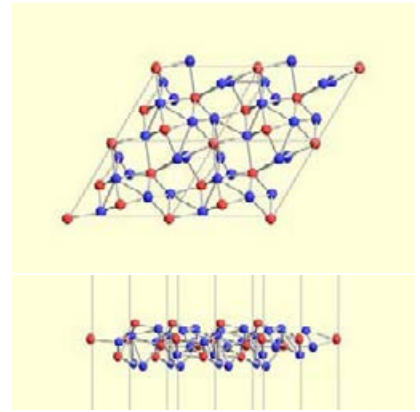

BiO<sub>2</sub> (P)

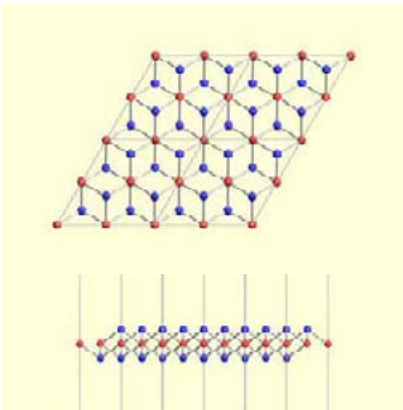

BiAl<sub>2</sub> (T)

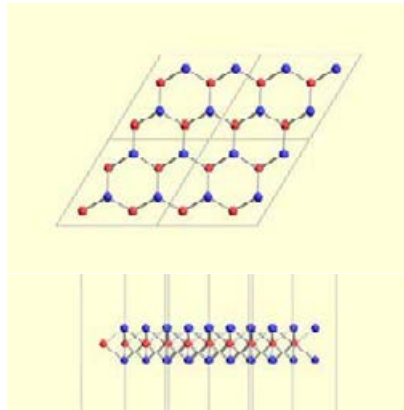

BiAl<sub>2</sub> (H)

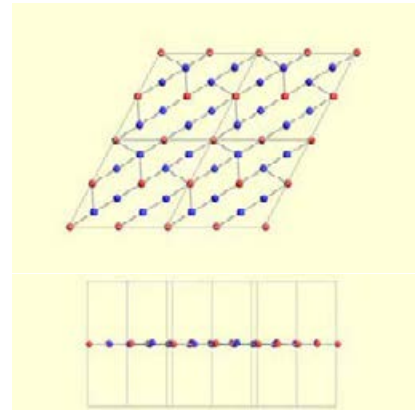

BiAl<sub>2</sub> (P)

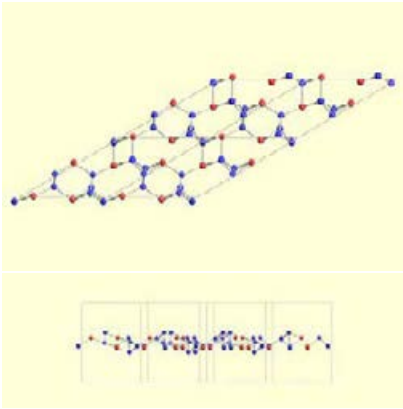

BiSi<sub>2</sub> (T)

×

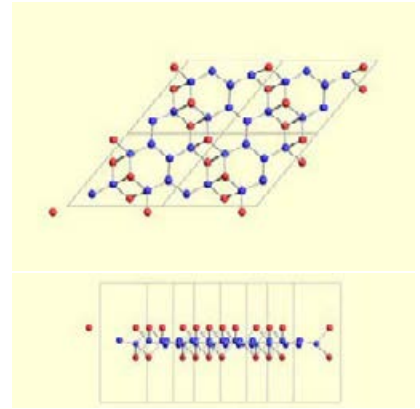

BiSi<sub>2</sub> (P)

×

×

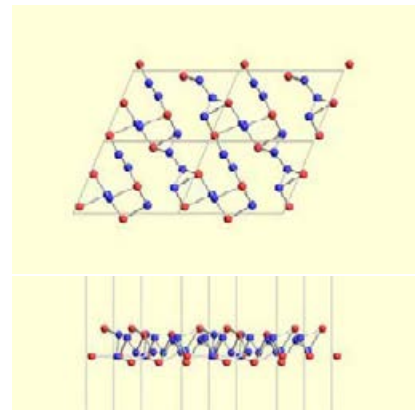

BiP<sub>2</sub> (P)



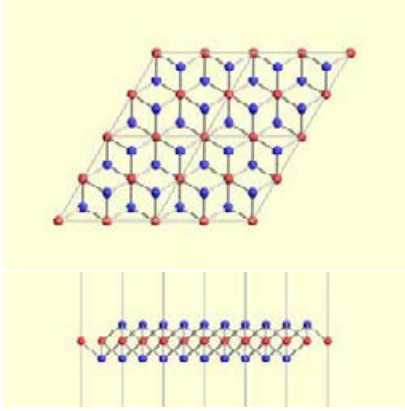

$\text{BiS}_2$  (T)

×

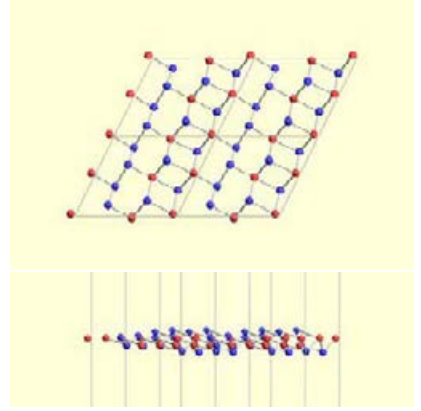

$\text{BiS}_2$  (P)

×

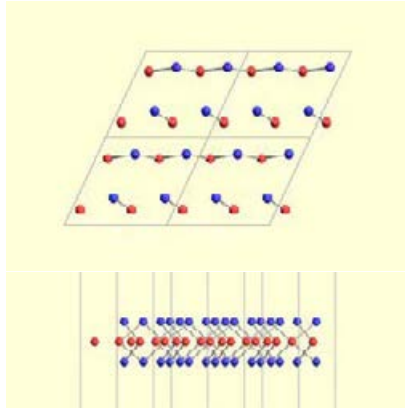

$\text{BiCl}_2$  (H)

×

×

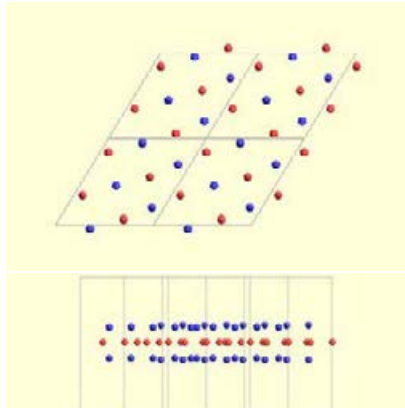

$\text{BiK}_2$  (H)

×

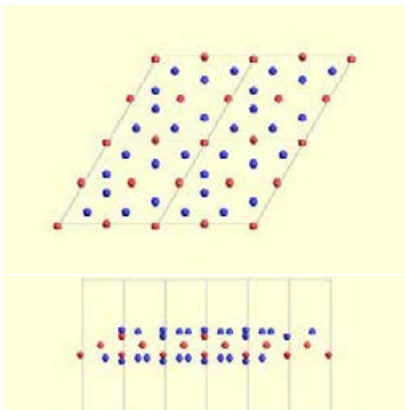

$\text{BiCa}_2$  (T)

×

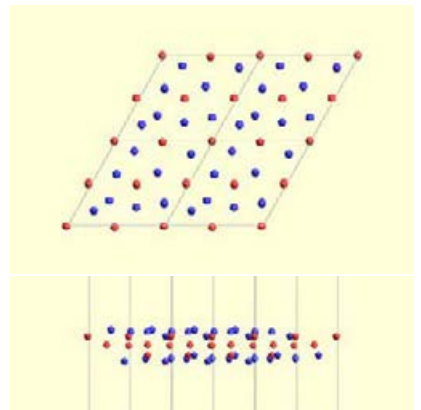

$\text{BiCa}_2$  (P)

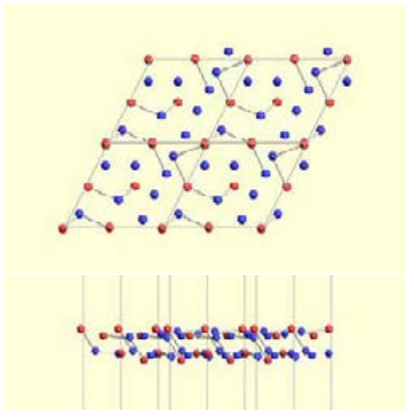

BiSc<sub>2</sub> (T)

×

×

×

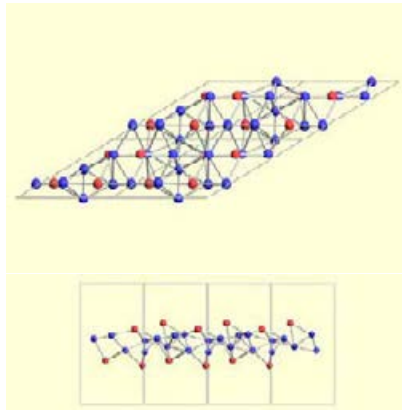

BiV<sub>2</sub> (H)

×

×

×

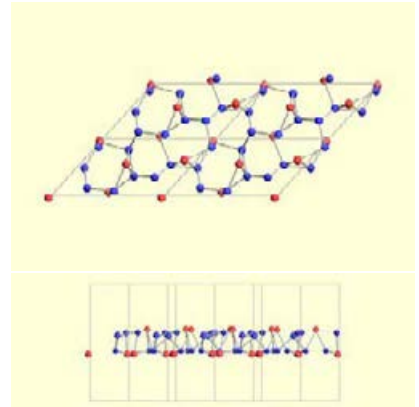

BiGe<sub>2</sub> (P)

×

×

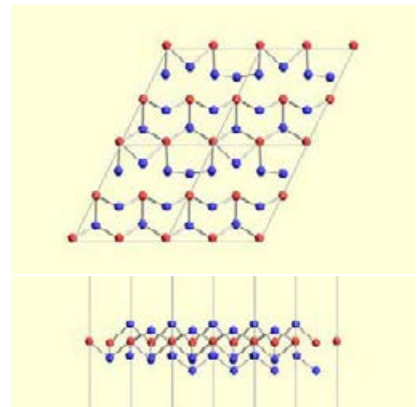

BiSe<sub>2</sub> (P)

×

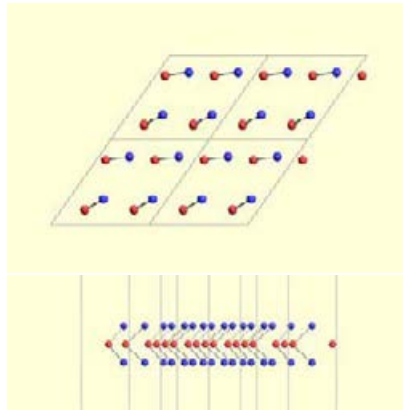

$\text{BiBr}_2$  (H)

×

×

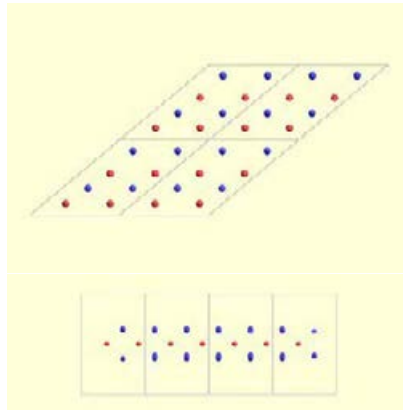

$\text{BiRb}_2$  (H)

×

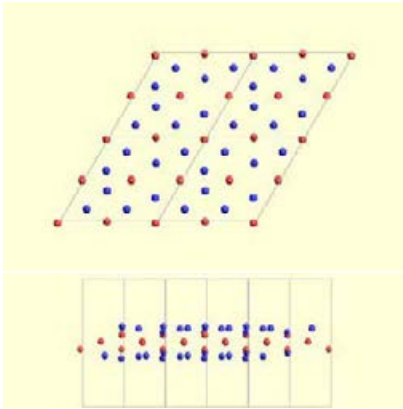

$\text{BiSr}_2$  (T)

×

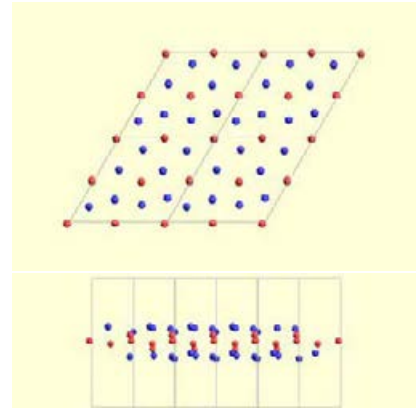

$\text{BiSr}_2$  (P)

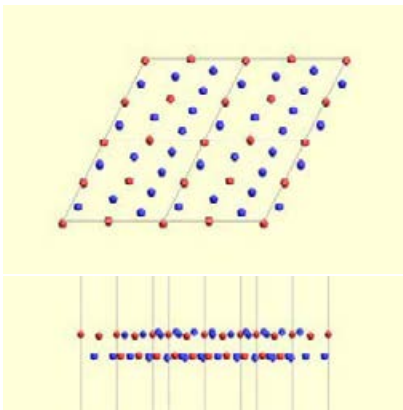

$\text{BiY}_2$  (T)

×

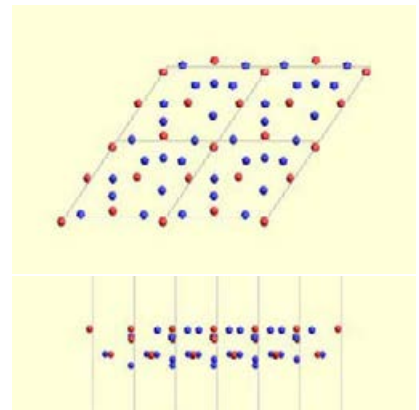

$\text{BiY}_2$  (P)

×

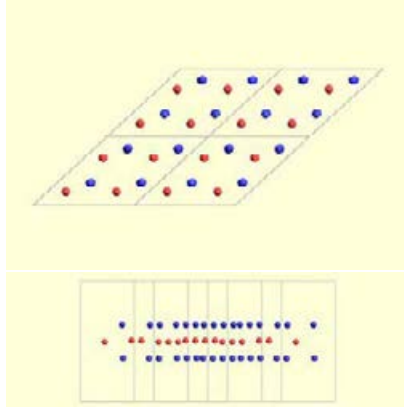

×

BiIn<sub>2</sub> (H)

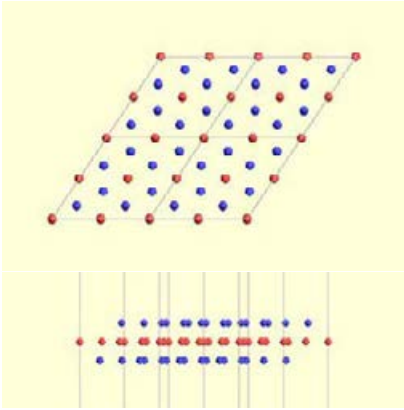

BiTe<sub>2</sub> (T)

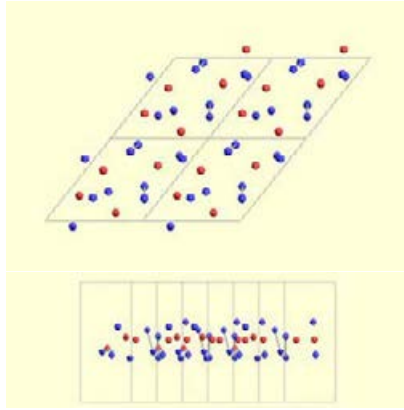

BiTe<sub>2</sub> (H)

×

×

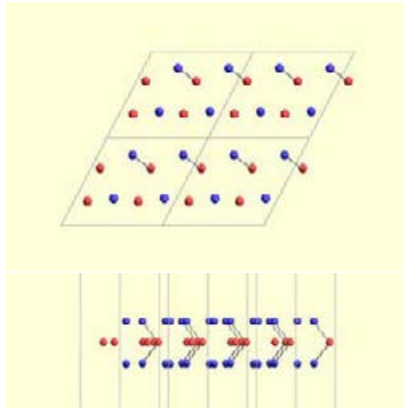

BiI<sub>2</sub> (H)

×

×

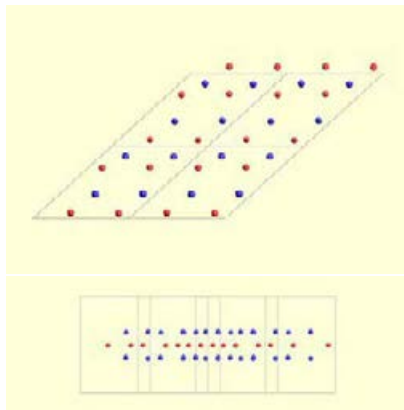

BiCs<sub>2</sub> (H)

×

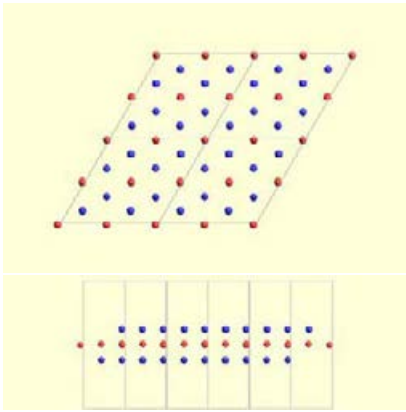

BiBa<sub>2</sub> (T)

×

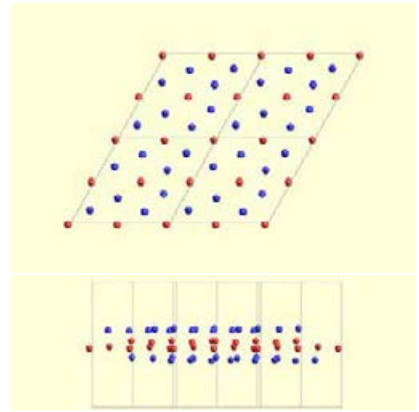

BiBa<sub>2</sub> (P)

×

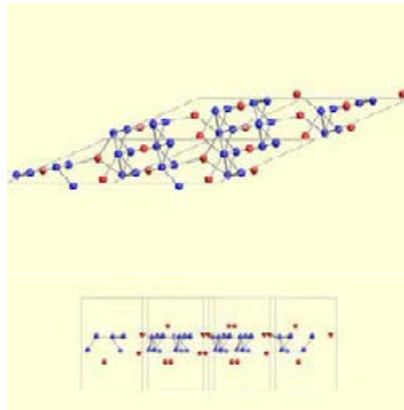

BiRe<sub>2</sub> (H)

×

×

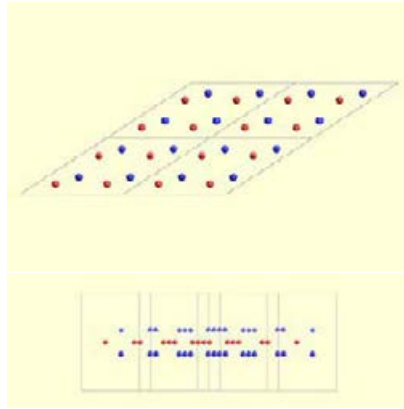

BiHg<sub>2</sub> (H)

×

×

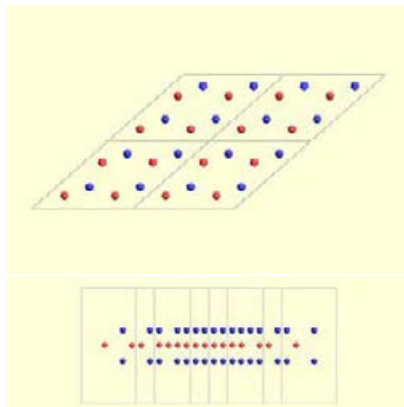

BiTl<sub>2</sub> (H)

×



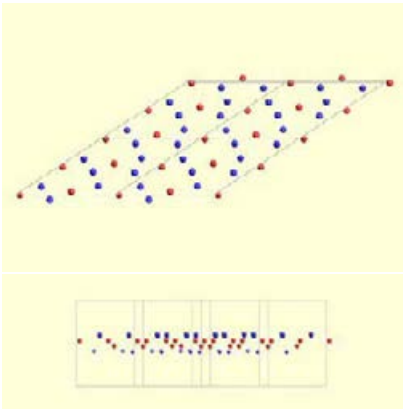

BiPb<sub>2</sub> (T)

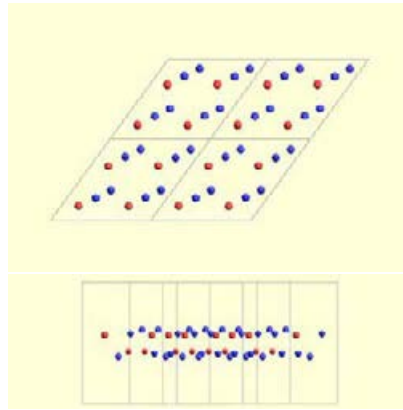

BiPb<sub>2</sub> (H)

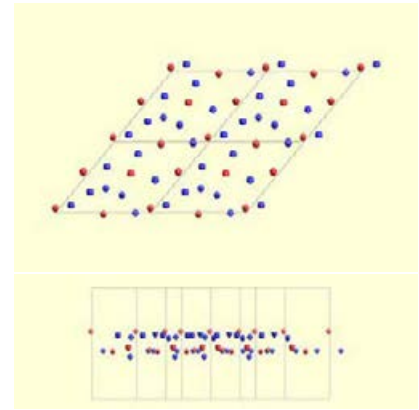

BiPb<sub>2</sub> (P)

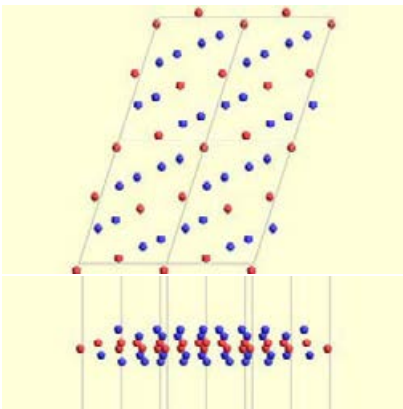

BiBi<sub>2</sub> (T)

×

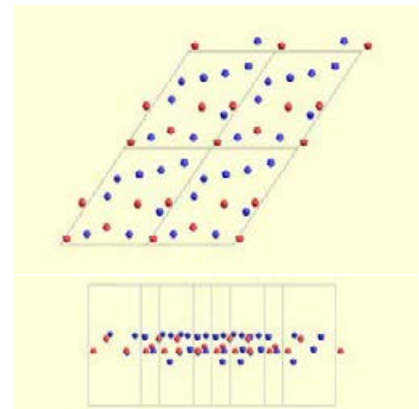

BiBi<sub>2</sub> (P)
